# Supplementary material
Source: MDPI journal article supplement (https://www.mdpi.com/2072-4292/13/5/1035)
Supplement: s1 [file s1]

1  
2  
3  
4  
5  
6  
7  
8  
9  
10  
11  
12  
13  
14  
15  
16  
17  
18  
19  
20  
21

Supplementary Data for

Remote soil moisture measurement from drone-borne reflectance spectroscopy: Applications to  
hydroperiod measurement in desert playas

Joseph Levy<sup>a\*</sup> and Jessica Johnson<sup>a</sup>

<sup>a</sup> Colgate University, Department of Geology, 13 Oak Drive, Hamilton, NY 13346, USA.

[jlevy@colgate.edu](mailto:jlevy@colgate.edu)

\* Indicates corresponding author

- This supporting dataset includes:
- Ground-based reflectance measurements for the two plume-crossing transects (AHT3 and AHT4). Data show reflectance by wavelength at each scan position.
  - Reduced data records (RDR) showing GPS position data for the drone and the associated reflectance measurement, by wavelength, averaged over 1 second intervals for the three mapping sorties, AHS4, 5, and 7.
  - The sample datasheet showing ground-based and lab-base measurements of the sampling transects.
