# Supplementary material
Source: MDPI journal article supplement (https://www.mdpi.com/2072-4292/13/5/1035)
Supplement: s1 [file s1]

Archive with 18 entries (17 files):
- supporting_data/
- __MACOSX/._supporting_data
- supporting_data/AHT4_ground_spectra.csv
- __MACOSX/supporting_data/._AHT4_ground_spectra.csv
- supporting_data/fly033sec-ahs7-matched.csv
- __MACOSX/supporting_data/._fly033sec-ahs7-matched.csv
- supporting_data/.DS_Store
- __MACOSX/supporting_data/._.DS_Store
- supporting_data/supplement.pdf
- __MACOSX/supporting_data/._supplement.pdf
- supporting_data/fly030sec-ahs4-matched.csv
- __MACOSX/supporting_data/._fly030sec-ahs4-matched.csv
- supporting_data/AHT3_ground_spectra.csv
- __MACOSX/supporting_data/._AHT3_ground_spectra.csv
- supporting_data/Alvord Datasheet.csv
- __MACOSX/supporting_data/._Alvord Datasheet.csv
- supporting_data/fly031sec-ahs5-matched.csv
- __MACOSX/supporting_data/._fly031sec-ahs5-matched.csv
