# Supplementary material
Source: MDPI journal article supplement (https://www.mdpi.com/2072-4292/13/5/1035)
Supplement: s1 [file s1 › supporting_data/AHT3_ground_spectra.csv]

Wavelength	AHT3-A	AHT3-B	C	D	E	F	G	H	I	J	K	L	M
940.046	19.65	17.4	20.69	24.38	24.64	27.68	29.67	25.86	27.59	21.87	20.82	26.38	15.57
946.742	19.23	17.74	20.68	24.18	24.37	27.28	29.36	25.24	27.08	21.66	20.41	25.9	14.99
953.407	19.29	17.03	20.3	24.24	24.35	27.47	29.22	25.39	27.25	21.45	20.33	25.99	14.94
960.04	19.43	17.1	20.48	24.26	24.55	27.56	29.52	25.74	27.38	21.82	20.55	26.33	15.11
966.642	19.24	16.87	20.24	24.26	24.55	27.67	29.43	25.52	27.39	21.86	20.32	26.49	15.11
973.214	19.31	17.24	20.6	24.28	24.61	27.15	29.47	25.75	27.4	21.75	20.53	26.18	15.34
979.755	19	16.86	20.29	23.79	24.25	26.94	28.76	25.26	27.26	21.13	19.94	26.03	14.66
986.266	18.95	17.03	20.33	24.08	24.39	27.21	28.72	25.35	26.9	21.26	20.19	26.32	14.9
992.747	19.01	16.95	19.87	23.93	23.99	27.54	28.67	25.09	26.99	20.97	20.18	25.92	14.58
999.199	19.18	16.84	20.13	23.86	24.4	27.21	29.07	25.25	26.87	21.15	19.89	25.99	15.11
1005.621	19.12	17.12	20	23.97	24.2	27.08	29.08	25.15	27.08	21.36	19.97	26.17	14.78
1012.015	19.53	17.23	20.85	24.37	24.3	27.78	29.48	25.82	27.24	21.52	20.61	26.4	15.87
1018.38	18.32	16.34	19.96	23.61	23.68	26.58	28.35	25.04	26.1	20.44	19.55	25.45	14.26
1024.718	18.97	16.72	20.07	23.66	23.83	27.25	28.27	24.79	26.36	20.89	19.62	25.68	14.56
1031.027	18.7	16.8	20.01	23.64	24.06	27.2	28.86	25.37	26.89	21.57	20.43	26.72	15.45
1037.309	18.62	16.72	19.56	23.64	23.36	27.08	28.56	24.9	26.73	20.97	19.74	25.99	15.1
1043.564	18.22	16.36	19.55	23.44	23.76	26.49	28.4	24.8	26.2	20.49	19.45	25.81	14.56
1049.792	18.39	16.83	19.77	23.7	23.37	26.86	28.61	25.34	26.46	20.83	19.77	26.14	14.94
1055.994	18.21	16.43	19.45	22.66	22.84	26.27	27.61	23.72	25.72	19.6	18.76	24.48	13.66
1062.169	18.42	16.55	20.1	23.46	23.61	26.67	28.54	25.07	26.26	20.92	19.8	25.89	14.79
1068.319	18.77	16.9	19.57	23.45	23.75	26.91	28.55	24.59	26.34	20.78	19.68	26.27	15.04
1074.443	18.45	16.08	19.16	23.02	23.3	26.21	28.26	24.16	25.98	20.14	18.8	25.11	14.47
1080.542	17.9	16.19	18.7	22.29	22.62	25.54	27.55	23.41	25.13	19.24	18.28	24.62	13.77
1086.616	18.23	16.86	19.25	22.79	23.05	25.93	27.83	24.29	25.88	20.4	19.07	25.04	14.56
1092.666	18	16.23	19.16	22.47	22.76	25.78	27.75	23.81	25.44	19.88	18.96	24.92	14.02
1098.692	17.49	15.95	18.95	22.59	23.23	26.36	28.4	24.31	26.42	21	19.53	26.1	14.49
1104.694	18.27	15.91	19.55	23.18	24.07	27.31	29.47	24.95	26.23	21.51	20.24	26.13	16.21
1110.672	16.83	15.98	18.16	21.67	22.64	24.7	27.36	23.61	23.61	19.98	19.01	24.09	14.41
1116.627	17.24	16.06	19.4	21.98	23.81	25.54	28.34	23.17	25.54	20.37	19.83	24.68	15.84
1122.559	17.29	16.28	19.31	22.24	21.94	25.48	27	23.66	25.58	20.12	18.71	24.57	14.96
1128.469	16.52	15.42	16.92	20.63	21.03	24.03	25.77	22.29	23	17.87	16.84	23.24	11.62
1134.357	18.26	17.69	20.25	23.08	23.56	26.96	29.14	25.64	27.06	21.95	21.29	27.15	18.26
1140.223	17.96	16.54	20.13	22.97	22.97	26.73	28.15	25.98	27.15	22.06	20.89	26.48	17.13
1146.067	18.13	16.29	18.79	22.08	21.81	25.49	26.48	23.06	24.18	19.05	18.27	23.78	14.13
1151.89	17.59	15.65	18.22	21.85	21.74	24.16	26.52	22.85	24.37	18.86	17.96	23.58	14.08
1157.693	17.69	16.15	18.9	22.07	21.79	24.83	26.92	23.47	24.36	19.46	18.34	24.78	14.47
1163.475	18.18	16.28	19.11	22.24	22.33	25.51	27.18	24.32	25.29	19.95	18.8	25.38	15.27
1169.236	18.41	16.48	18.8	22.54	22.63	25.66	27.68	24.21	25.66	20.3	19.46	25.92	15.99
1174.978	18.37	16.48	18.96	22.69	21.97	25.57	27.33	24	25.12	20.13	19.32	25.71	15.17
1180.701	17.79	15.75	18.5	21.47	21.52	24.49	26.97	22.94	24.05	18.77	17.97	24.58	14.2
1186.404	17.93	15.93	18.14	21.88	21.84	25.06	26.81	22.85	24.26	19.16	17.88	24.47	14.15
1192.088	18.61	16.78	18.79	22.37	22.5	25.91	27.52	23.72	25.08	19.83	18.74	25.38	14.98
1197.754	18.26	16.05	18.48	22.46	22.24	25.38	26.57	22.94	24.23	19.23	17.99	25.33	14.41
1203.401	18.54	16.77	19.06	22.62	22.53	25.82	27.86	24.35	25.52	20.49	19.15	26.21	15.42
1209.031	18.21	16.38	18.29	22.03	22.03	25.27	26.88	23.22	24.97	19.01	18.21	24.88	14.72
1214.643	18.62	16.53	18.53	22.62	22.53	25.45	27.45	23.78	25.03	19.45	18.66	25.49	15.16
1220.238	18.61	16.57	18.36	21.98	22.19	25.48	27.77	23.36	25.19	19.53	18.57	25.56	15.11
1225.816	18.94	16.61	18.77	22.9	23.15	25.97	28.1	23.97	25.69	20.37	18.98	26.22	15.5
1231.378	18.4	15.9	18.48	21.95	22.24	25.18	27.27	23.59	24.61	19.38	18.11	25.35	14.88
1236.923	18.14	16.25	17.86	21.73	21.48	25.11	26.72	23.05	24.45	18.93	18.23	25.24	13.98
1242.453	18.7	17.08	19.15	22.52	22.81	26.09	28	24.51	25.88	20.61	19.86	26.59	16.12
1247.967	18.76	16.65	18.72	22.19	22.45	26.01	27.15	23.72	24.9	19.74	18.68	26.05	15.46
1253.466	18.19	16.75	18.19	22.04	21.99	25.54	27.28	23.57	24.92	19.63	18.45	25.32	15.13
1258.95	18.56	16.15	18.23	22.11	22.11	25.13	26.59	23.24	24.52	19.7	18	25.6	15.02
1264.419	19.64	17.16	19.74	23.43	23.18	26.92	28.85	25.35	26.72	21.2	20.19	27.63	17.46
1269.874	18.7	16.27	18.84	22	22.05	25.45	26.95	23.46	24.62	19.04	18.41	25.06	15.25
1275.315	18.6	16.52	18.37	22.4	22.54	25.59	27.26	23.51	24.71	19.57	18.65	25.45	15.41
1280.743	18.65	15.96	18.83	22.26	21.8	25.42	26.25	22.91	24.35	19.16	17.76	25.23	14.52
1286.157	18.83	16.86	18.78	23.03	22.39	25.69	27.74	24.31	25.64	20.02	19.01	26.74	16.13
1291.559	18.59	16.59	18.36	21.98	22.35	25.65	27.09	23.42	24.91	18.82	17.7	25.98	15.24
1296.948	18.87	16.41	18.63	22.25	22.35	25.87	27.61	23.94	24.71	20.27	19.02	26.35	15.69
1302.325	18.12	16.12	18.07	21.56	21.71	24.54	26.28	22.9	23.77	18.63	17.4	25.1	14.48
1307.69	19.12	17.55	19.23	22.43	23.46	25.68	28.22	24.54	26.16	20.64	19.61	27.41	16.74
1313.043	18.36	16.47	17.71	21.56	22.22	25.41	27.55	24.05	25.12	19.25	18.25	26.18	15.52
1318.385	18.19	16.21	18.13	21.29	21.53	24.63	26.55	23.02	24.38	18.94	17.33	24.44	14.73
1323.716	17.86	16.95	18.19	22.23	22.03	24.64	26.6	23.21	24.64	18.9	18.19	26.14	14.93
1329.037	18.26	17.17	19.1	22.61	23.2	25.71	28.31	24.87	26.55	21.19	20.85	28.14	17.84
1334.347	17.52	15.09	16.74	20.9	20.99	23.85	24.8	21.51	22.81	17.69	16.39	24.2	14.4
1339.647	18.02	15.62	17.84	21.63	21.16	24.03	26.99	23.2	24.77	19.59	18.11	25.42	16.17
1344.938	18.09	16.62	17.21	22.65	21.76	26.03	28.68	24.71	25.44	20.44	19.41	27.94	16.62
1350.22	18.21	16.12	17.01	23.88	22.99	24.78	31.64	25.07	27.16	21.79	21.79	27.46	16.72
1355.493	17.18	12.33	17.62	22.47	22.91	23.35	33.04	23.79	26.43	23.79	17.62	25.55	17.62
1360.757	12.02	12.98	11.54	22.12	19.71	26.44	23.56	25	23.56	24.04	14.42	21.63	11.06
1366.012	16.26	18.72	16.75	23.15	24.63	24.63	31.53	25.12	26.6	27.59	19.7	29.06	16.26
1371.26	14	16.5	15.5	18.5	20	21.5	26	21	18.5	18	20	21.5	11.5
1376.501	20.53	19.47	24.74	24.21	25.79	23.16	36.32	24.21	27.37	25.79	20.53	26.32	17.89
1381.734	8.29	11.05	17.68	16.02	17.68	18.78	21.55	14.92	13.26	10.5	11.05	13.81	5.52
1386.96	11.98	14.58	16.67	18.23	16.15	20.83	27.6	16.67	24.48	11.98	16.15	15.1	8.33
1392.179	9.9	7.81	11.98	20.83	22.4	15.1	26.04	14.58	13.02	11.46	13.54	16.67	5.73
1397.392	19	18.5	22	22.5	30	24	34	24.5	30.5	26	23	25	19
1402.599	14.29	9.85	18.23	16.26	25.62	18.72	28.57	21.18	25.62	18.72	15.27	19.21	10.34
1407.801	10.73	11.71	14.63	21.95	16.59	21.95	24.39	17.56	20.49	16.59	20.49	21.95	10.24
1412.997	19.62	16.92	20	25.77	24.23	26.15	33.08	23.85	27.31	22.69	21.15	30	18.46
1418.189	16.07	13.93	18.21	22.86	18.93	21.43	31.07	23.57	25	17.5	18.21	25.71	15.36
1423.376	16.88	15.61	15.29	22.61	21.66	24.84	27.39	20.7	23.89	20.38	20.06	27.07	19.43
1428.558	17.86	12.64	16.21	15.66	19.23	18.41	23.9	15.93	19.78	16.21	12.64	19.78	11.81
1433.737	16.19	14.77	17.33	19.32	20.74	22.73	26.42	22.16	21.31	21.31	18.47	26.14	15.91
1438.911	14.01	12.09	14.29	16.21	16.21	17.58	22.25	16.76	15.66	14.01	13.46	18.41	10.99
1444.083	14.35	15.07	16.99	16.75	19.62	19.62	23.68	20.81	20.33	18.18	17.46	25.36	16.03
1449.252	17.54	15.03	15.45	19	17.95	19.83	22.34	20.04	21.5	18.79	17.33	23.8	17.54
1454.418	14.43	13.84	13.99	16.52	16.52	18.15	21.43	16.52	17.56	15.77	15.92	22.92	14.58
1459.581	15.01	14.6	15.01	15.98	18.04	17.63	19.97	18.04	17.91	15.98	16.39	23.42	15.7
1464.743	14.49	13.38	13.69	15.76	18.31	16.88	20.38	15.29	15.61	14.17	12.42	19.9	11.78
1469.903	14.05	12.75	14.23	17.93	18.67	17.93	23.48	18.67	19.96	18.85	17.01	23.84	16.82
1475.062	16.06	14.24	14.39	17.58	17.42	20.3	20.91	19.39	20.61	17.42	16.67	25	16.06
1480.22	16.22	12.97	13.65	15.81	16.35	18.24	19.19	16.89	17.16	13.92	13.38	21.22	13.92
1485.377	15.64	14.67	13.94	17.94	16.97	18.91	21.45	16	18.06	15.27	14.55	22.42	13.94
1490.534	14.86	13.33	12.67	16	15.05	16.67	18.48	15.05	15.33	13.05	12.1	20.48	13.05
1495.69	15.55	14.24	13.91	15.88	16.53	18	19.07	17.02	16.86	14.48	13.75	21.77	13.83
1500.848	16.17	14.91	15.06	16.72	16.8	19.16	21.06	17.82	18.3	15.54	14.59	23.34	15.06
1506.006	16.59	14.96	14.22	17.33	17.04	18.74	20.67	18.22	18.44	15.04	14.89	22.67	14.3
1511.164	15.26	14.43	13.66	17	16.72	17.7	20.14	17.14	17.21	14.56	14.08	22.09	13.38
1516.325	16.91	14.97	15.04	17.74	17.53	19.54	22.25	19.06	19.2	16.01	15.94	24.95	16.15
1521.486	17	15.49	15.09	17.82	17.54	19.66	22.12	18.57	19.32	15.56	15.56	24.37	15.97
1526.65	16.05	14	14.21	16.94	16.73	18.58	20.63	17.14	17.76	14.55	13.87	22.68	13.8
1531.816	15.93	14.81	14.48	17.18	16.79	18.3	21.26	17.71	18.3	14.55	13.82	22.58	13.96
1536.985	17.08	15.16	15.23	18.3	18.55	20.15	22.52	19	19.51	15.99	15.16	23.8	15.61
1542.157	17.27	15.08	15.66	18.3	18.49	19.78	22.23	19.33	19.65	15.59	14.63	24.36	15.4
1547.332	17.22	15.37	15.82	18.88	18.75	20.92	22.7	20.41	20.47	16.58	15.56	24.74	15.37
1552.511	17.25	15.37	15.05	18.68	18.35	20.88	23.02	19.2	20.36	16.02	15.43	24.25	15.11
1557.694	17.1	15.4	16.38	18.81	19.4	21.04	23.2	20.38	20.12	16.71	16.06	25.03	16.12
1562.881	17.66	15.85	16.19	19.41	19.41	22.36	23.51	20.55	21.76	17.39	17.06	25.65	16.12
1568.073	17.46	15.43	16.34	19.55	19.27	21.93	24.37	21.93	21.72	17.95	16.9	26.05	16.34
1573.27	17.51	16.21	16.28	19.91	19.26	21.66	23.84	20.78	21.29	16.57	15.99	24.42	15.33
1578.472	17.95	16.12	16.41	20.51	19.56	22.49	24.69	21.39	22.2	17.07	16.63	25.86	16.56
1583.679	18.32	15.35	16.15	19.26	18.68	21.94	24.55	21	22.16	17.09	16.15	25.71	16.58
1588.893	18.27	15.72	16.3	19.21	19.07	21.69	24.38	20.6	20.52	15.79	15.5	24.82	16.3
1594.113	18.06	16.67	16.45	19.59	19.59	23.03	24.71	20.98	21.86	16.96	16.89	25.29	16.59
1599.339	18.4	16.03	16.18	19.47	19.47	21.91	25.04	21.6	21.45	17.4	17.1	25.5	16.64
1604.573	18.7	16.23	16.69	20.4	20.02	22.64	24.73	21.79	22.33	17	17.08	25.97	16.62
1609.814	18.62	15.81	16.2	19.64	19.64	22.77	24.02	21.05	21.36	16.74	15.88	24.96	15.18
1615.062	18.31	16.17	17.09	20.75	20.67	23.26	25.78	22.73	23.11	17.77	17.62	26.16	16.78
1620.319	17.76	14.8	15.65	19.16	18.69	21.5	24.22	20.87	21.03	15.89	15.26	24.69	15.73
1625.583	17.93	15.74	16.13	19.26	19.89	22.71	24.75	21.77	21.69	16.91	15.82	25.61	16.05
1630.857	19.07	16.52	17.4	21.39	21.07	24.18	26.34	22.91	23.22	18.36	18.28	27.45	18.04
1636.139	17.86	15.56	16.21	20.33	20	22.8	25.27	21.23	22.55	17.37	16.54	25.93	16.05
1641.431	18.28	16.36	16.36	21.93	20.63	23.85	25.85	22.37	22.37	17.93	16.45	26.72	16.54
1646.732	18.9	17.58	17.58	21.11	22.08	24.73	27.39	23.5	24.12	19.26	19.08	29.06	18.99
