# Supplementary material
Source: MDPI journal article supplement (https://www.mdpi.com/2072-4292/13/5/1035)
Supplement: s1 [file s1 › supporting_data/AHT4_ground_spectra.csv]

Wavelength	AHT4-A	AHT4-B	C	D	E	F	G	H	I	J	K	L	M
940.046	17.23	19.81	19.18	22.76	28.37	30.25	30.63	30.17	29.27	29.34	27.51	24.82	18.29
946.742	16.94	19.7	19.03	22.66	28.14	29.94	30.27	29.88	28.96	29.13	27.07	24.42	17.94
953.407	16.89	19.58	18.96	22.68	28.08	29.88	30.19	29.79	28.81	28.93	27.03	24.38	17.87
960.04	16.87	19.54	18.88	22.75	27.99	30	30.19	29.81	28.76	28.98	27.07	24.67	17.84
966.642	16.95	19.52	18.84	22.55	27.88	29.85	30.23	29.67	28.82	28.88	27.08	24.54	17.77
973.214	16.81	19.39	18.82	22.54	27.81	29.75	30.09	29.59	28.79	28.79	26.95	24.32	17.78
979.755	16.87	19.5	18.84	22.66	27.87	29.79	30.06	29.63	28.71	28.79	26.94	24.46	17.68
986.266	16.68	19.34	18.6	22.37	27.69	29.58	29.95	29.39	28.61	28.63	26.78	24.32	17.7
992.747	16.81	19.3	18.68	22.25	27.67	29.51	29.87	29.39	28.52	28.64	26.72	24.28	17.54
999.199	16.7	19.29	18.64	22.28	27.74	29.53	29.82	29.42	28.6	28.59	26.71	24.27	17.49
1005.621	16.76	19.3	18.59	22.22	27.58	29.51	29.79	29.26	28.52	28.55	26.7	24.15	17.45
1012.015	16.76	19.3	18.66	22.31	27.63	29.4	29.76	29.38	28.5	28.57	26.7	24.26	17.54
1018.38	16.46	18.89	18.24	21.83	27.21	29.14	29.49	28.98	28.12	28.2	26.34	23.78	17.21
1024.718	16.5	18.91	18.32	21.94	27.34	29.18	29.51	29.1	28.24	28.23	26.4	23.86	17.28
1031.027	16.73	19.22	18.51	22.19	27.42	29.33	29.65	29.22	28.34	28.42	26.59	24.05	17.41
1037.309	16.44	18.99	18.16	21.85	27.23	29.14	29.52	28.96	28.17	28.3	26.37	23.89	17.14
1043.564	16.55	18.93	18.27	21.84	27.17	28.93	29.42	28.91	28.2	28.12	26.31	23.72	17.17
1049.792	16.36	18.91	18.23	21.75	27.07	28.9	29.36	28.83	27.96	28.01	26.29	23.73	17.08
1055.994	16.06	18.44	17.91	21.3	26.69	28.61	29.03	28.48	27.61	27.7	25.69	23.18	16.78
1062.169	16.2	18.58	17.97	21.53	26.83	28.75	29.07	28.56	27.84	27.82	25.98	23.4	16.88
1068.319	16.24	18.64	18.06	21.52	26.79	28.74	29.12	28.52	27.92	27.88	26	23.46	16.87
1074.443	16.04	18.55	17.69	21.2	26.54	28.48	28.91	28.4	27.7	27.63	25.74	23.26	16.78
1080.542	15.97	18.34	17.66	21.07	26.28	28.16	28.6	28.07	27.35	27.25	25.5	23.01	16.57
1086.616	15.84	18.32	17.48	21.05	26.3	28.26	28.68	28.06	27.29	27.5	25.34	23.04	16.65
1092.666	15.84	18.12	17.57	21.04	26.21	27.94	28.47	28.03	27.15	27.18	25.34	22.93	16.65
1098.692	15.92	17.98	17.59	21.19	25.74	27.79	28.67	27.84	27.5	27.35	25.57	23.18	16.62
1104.694	15.79	17.74	17.51	20.97	25.45	27.49	28.29	27.96	27.72	27.62	25.57	23.26	16.84
1110.672	15.51	17.92	17.05	20.56	25.76	27.28	28.27	27.91	27.38	27.11	25.37	22.92	16.95
1116.627	16.22	18.31	17.85	21.46	26.44	28.36	28.54	28.12	27.4	27.32	25.79	23.39	17.78
1122.559	15.89	18.21	17.61	21.13	26	27.7	28.42	27.98	27.53	27.48	25.77	23.21	17.1
1128.469	15.77	18.06	17.34	20.65	25.88	27.47	27.91	27.58	26.76	26.89	25.05	22.76	16.77
1134.357	15.73	18.32	17.61	21.02	25.95	27.72	28.27	28.15	27.7	27.68	25.78	23.28	17.56
1140.223	16.28	18.64	17.78	21.19	26.55	28.34	28.54	28.38	27.83	27.45	25.96	23.46	17.7
1146.067	16.1	18.12	17.42	20.81	26.03	27.61	27.91	27.73	26.78	26.77	25.2	22.96	16.57
1151.89	15.97	18.2	17.31	20.54	25.85	27.47	27.68	27.34	26.56	26.6	24.93	22.66	16.47
1157.693	16.06	18.12	17.64	20.77	25.87	27.77	28.07	27.7	26.87	26.82	25.19	22.82	16.52
1163.475	15.9	17.92	17.29	20.59	25.76	27.61	28.09	27.64	26.56	26.75	25.07	22.71	16.34
1169.236	16.14	18.19	17.47	20.88	26.12	27.78	28.43	27.89	27.16	27.08	25.25	22.85	16.71
1174.978	16	17.96	17.4	20.73	25.89	27.7	28.22	27.74	26.84	26.96	25.13	22.74	16.53
1180.701	15.82	17.81	17.19	20.53	25.51	27.26	27.81	27.1	26.56	26.49	24.68	22.39	16.14
1186.404	16.01	18.02	17.3	20.56	25.68	27.61	28.02	27.49	26.66	26.62	25.07	22.57	16.38
1192.088	16.03	18.1	17.28	20.53	25.83	27.47	28.11	27.47	26.8	26.82	25	22.69	16.41
1197.754	16.07	17.97	17.2	20.51	25.57	27.32	27.98	27.46	26.49	26.53	24.84	22.51	16.27
1203.401	16.3	18.17	17.5	20.76	26	27.88	28.38	27.8	27	26.95	25.24	22.77	16.6
1209.031	16.06	18.06	17.37	20.55	25.92	27.62	28.34	27.46	26.66	26.78	24.97	22.62	16.27
1214.643	16.07	17.96	17.27	20.36	25.92	27.73	28.25	27.64	27.04	26.98	25.09	22.51	16.32
1220.238	16.23	18.12	17.38	20.73	25.94	27.93	28.35	27.79	27.06	26.91	25.21	22.8	16.47
1225.816	16.55	18.33	17.54	20.84	26.19	28.05	28.55	27.95	27.33	27.31	25.36	22.89	16.69
1231.378	16.21	17.93	17.46	20.51	25.82	27.91	28.29	27.59	26.91	26.88	24.99	22.68	16.51
1236.923	16.15	18.1	17.25	20.58	25.89	27.79	28.36	27.5	26.83	26.96	24.94	22.62	16.32
1242.453	16.46	18.28	17.64	20.84	26.34	28.14	28.81	28.19	27.32	27.31	25.48	23.12	16.74
1247.967	16.4	18.27	17.46	20.84	26.08	28.09	28.74	28.02	27.12	27.19	25.35	22.92	16.61
1253.466	16.32	18.14	17.53	20.61	26.01	27.94	28.46	27.76	27.16	27.09	25.12	22.83	16.45
1258.95	16.27	18.2	17.47	20.82	25.92	27.78	28.54	27.68	27.16	26.91	25.05	22.74	16.47
1264.419	16.58	18.36	17.66	20.98	26.23	28.17	29	28.32	27.65	27.64	25.62	23.28	16.96
1269.874	16.83	18.44	17.67	20.88	26.26	28.28	28.7	28.14	27.16	27.2	25.38	22.94	16.75
1275.315	16.55	18.21	17.47	20.73	26.14	27.88	28.53	28	27.03	27.04	25.18	22.83	16.72
1280.743	16.43	18.07	17.37	20.59	25.85	27.75	28.26	27.76	27.05	26.75	25.1	22.57	16.33
1286.157	16.83	18.41	17.67	20.98	26.49	28.18	29.01	28.27	27.55	27.38	25.58	22.95	16.86
1291.559	16.54	18.19	17.4	20.78	26.13	27.81	28.53	27.92	27.13	27.1	25.23	22.85	16.56
1296.948	16.59	18.25	17.48	20.81	26.1	27.91	28.59	28.02	27.21	27.1	25.28	22.97	16.83
1302.325	16.31	17.93	17.13	20.49	25.65	27.39	28.26	27.55	26.74	26.75	24.85	22.61	16.3
1307.69	16.63	18.35	17.5	20.73	25.89	27.9	28.73	28.1	27.19	27.22	25.24	22.98	16.76
1313.043	16.63	18.19	17.6	20.85	25.86	27.54	28.42	27.94	27.02	27.07	25.31	23	16.77
1318.385	16.45	17.95	17.1	20.35	25.52	27.25	28	27.4	26.65	26.7	24.89	22.49	16.37
1323.716	16.34	17.93	16.99	20.36	25.3	27.24	27.91	27.27	26.67	26.38	24.74	22.52	16.27
1329.037	16.59	17.85	17.21	20.71	25.32	27.1	28.22	27.55	27.01	27.13	25.2	23.07	16.81
1334.347	16.51	18.09	17.21	20.51	25.56	26.79	28.03	27.55	26.08	26.5	25.02	22.83	16.65
1339.647	16.34	17.92	17.1	20.35	25.4	26.97	27.61	27.09	26.3	26.57	25.01	22.71	16.66
1344.938	15.42	17.29	16.67	20.38	24.65	26.5	27.47	26.6	26.29	26.86	24.85	22.74	17.01
1350.22	17.17	18.85	18.75	22.38	26.8	27.54	29.65	29.04	28.2	28.02	27.39	25.1	19.26
1355.493	16.4	19.17	17.06	23.52	27.04	29.07	29.57	29.4	28.86	30.48	29.03	26.58	21.33
1360.757	17.59	19.32	19.78	23.98	27.64	28.55	30.06	29.69	29.05	30.7	28.78	26.63	21.56
1366.012	17.56	19.05	19.6	24.05	29.47	29.7	29.98	31.65	29.66	30.86	28.78	28.59	22.85
1371.26	16.35	19.89	19.46	22.75	27.34	28.73	30.54	30.26	27.58	28.15	27.68	24.86	21.32
1376.501	17.28	18.99	18.83	22.04	28.61	29.07	30.21	30.83	28.82	29.54	27.83	28.04	21.11
1381.734	16.2	17.92	17.72	22.77	25.8	27.66	28.07	29.33	26.7	29.38	24.53	23.83	19.03
1386.96	16.77	19.35	19.55	21.99	29.48	29.58	30.47	30.92	29.13	28.64	29.43	27.44	20.45
1392.179	15.76	17.43	18.67	21.3	26.65	27.13	29.37	29.42	27.89	26.7	26.65	23.83	19.25
1397.392	16.75	19.05	19.38	23.66	27.75	29.02	29.44	31.23	29.35	30.48	28.6	26.62	21.92
1402.599	15.47	18.39	17.65	21.78	26.29	28.24	29.77	28.8	27.03	29.03	25.92	24.76	20.72
1407.801	17.62	18.8	18.52	22.64	28.8	28.08	31.11	30.39	29.57	30.39	26.77	27.81	21.51
1412.997	16.86	20.6	18.03	22.75	26.44	29.35	29.72	30.37	28.63	27.91	26.67	25.24	21.09
1418.189	17.09	19.77	17.3	20.82	25.37	26.85	27.55	28.29	27.52	27.55	26.81	24.81	19.2
1423.376	15.98	17.88	17.76	20.42	23.53	25.78	26.19	26.4	25.42	25.63	24.21	22.43	18.97
1428.558	15.02	15.37	14.87	18.5	21.96	22.69	23.35	22.94	22.36	22.99	22.36	19.71	15.65
1433.737	15.02	15.97	15.23	19.29	22.82	22.5	23.4	24.3	23.06	23.69	22.74	21.07	16.72
1438.911	15.13	15.98	15.93	18.01	21.69	22.48	23.11	23.88	21.84	22.85	22.48	20.13	16.19
1444.083	15.39	17.85	16.32	18.7	21.98	23.12	23.55	23.76	22.71	23.89	22.37	20.91	17.42
1449.252	14.84	16.02	14.88	17.46	20.66	21.75	22	22.14	20.76	22.2	20.92	18.97	16.32
1454.418	14.15	15.12	14.43	16.53	19.59	19.88	20.55	20.98	19.59	20.45	19.94	18.85	14.92
1459.581	14.38	14.84	14.25	15.96	18.99	19.79	19.94	20.11	19.39	20.11	19.83	18.05	14.27
1464.743	14.23	14.77	14.3	16.33	18.99	19.91	20.31	20.35	19.23	20.45	19.43	17.49	13.75
1469.903	15.46	16.49	15.8	18.31	21.77	22.37	22.91	23.03	21.91	23.01	21.82	20.58	16.39
1475.062	14.81	15.34	14.86	17.23	20.28	21.18	21.52	21.6	20.52	21.12	20.81	19.33	15.31
1480.22	14.91	15.93	15.02	17.25	20.49	21.13	21.2	21.79	20.43	21.11	20.23	19.08	14.91
1485.377	14.57	15.42	14.8	16.88	20.03	20.43	21.24	20.84	20.02	21.17	19.87	18.61	14.92
1490.534	14.34	15	14.14	15.99	19.47	20.3	20.14	20.29	19.2	20.13	19.09	17.53	14.11
1495.69	14.42	15.17	14.38	16.16	19.61	20.26	20.45	20.3	19.31	20.25	19.43	17.73	14.04
1500.848	14.75	15.01	14.46	16.6	19.55	20.46	20.81	20.62	19.58	20.73	19.58	17.83	14.5
1506.006	14.65	15.11	14.59	16.63	19.98	20.52	20.9	20.87	19.82	20.78	19.71	18.12	14.21
1511.164	14.62	15.3	14.62	16.52	19.88	20.69	21.04	20.8	19.76	20.58	19.69	18.09	14.17
1516.325	15.11	15.35	15.08	16.96	20.52	21.54	21.54	21.52	20.62	21.56	20.46	18.9	14.5
1521.486	14.8	15.21	14.55	16.64	19.99	20.84	21.21	21.04	20.11	21.01	20.06	18.47	14.23
1526.65	15	15.2	14.66	16.71	20.2	21.08	21.34	21.14	20.22	21.18	19.93	18.29	14.36
1531.816	15.29	15.48	15	16.83	20.94	21.8	22.14	22	20.73	21.35	20.47	18.62	14.43
1536.985	15.04	15.68	14.71	16.95	20.89	21.96	22.31	22.19	20.9	21.7	20.68	18.81	14.42
1542.157	15.24	15.85	15.05	17.46	21.32	22.19	22.79	22.54	21.51	22.22	21.11	19.34	14.78
1547.332	15.43	15.9	15.18	17.51	21.53	22.62	23.35	23.02	21.77	22.43	21.4	19.42	15.04
1552.511	15.49	16.1	15.25	17.86	21.79	23.14	23.31	23.03	21.86	22.61	21.35	19.35	14.9
1557.694	16.03	16.26	15.63	18.05	22.06	23.24	23.76	23.46	22.48	23.11	22.13	20.13	15.32
1562.881	15.61	16.08	15.45	18.13	22.08	23.39	23.99	23.72	22.65	23.07	22.04	19.9	15.29
1568.073	16.03	16.36	15.87	18.36	22.56	23.75	24.51	23.96	23.05	23.66	22.37	20.28	15.5
1573.27	15.87	16.4	15.45	18.38	22.56	23.87	24.58	23.92	22.92	23.52	22.18	19.97	15.06
1578.472	16.13	16.49	15.72	18.45	22.79	24.06	24.88	24.49	23.51	23.94	22.73	20.71	15.51
1583.679	16.52	16.58	16.1	18.65	23.13	24.36	25.1	24.85	23.71	24.08	22.97	20.7	15.61
1588.893	16.23	16.48	15.73	18.39	22.92	24.2	24.93	24.62	23.52	23.68	22.37	20.23	15.15
1594.113	16.54	16.83	15.75	18.69	23.07	24.61	25.41	24.99	23.93	24.33	23.06	20.86	15.9
1599.339	16.47	16.89	15.83	18.87	23.41	24.69	25.59	24.95	24.24	24.43	23.25	21.06	16.08
1604.573	16.51	16.85	16.03	18.85	23.38	24.83	25.53	25.21	24.27	24.51	23.04	20.86	15.61
1609.814	16.49	16.52	15.99	18.63	23.56	24.61	25.44	25.23	24.15	24.33	22.93	20.58	15.54
1615.062	16.63	16.97	16.22	18.91	23.69	25.18	26.12	25.7	24.59	24.67	23.34	21.14	16.02
1620.319	16.49	16.71	16.01	18.71	23.43	24.86	25.53	25.23	24.18	24.47	23.12	20.78	15.46
1625.583	16.54	16.88	16.06	18.62	23.79	25.16	26.12	25.77	24.55	24.85	23.3	21.24	15.89
1630.857	16.9	16.95	16.27	18.68	23.91	25.33	26.13	25.67	24.73	25.03	23.47	21.36	15.98
1636.139	16.47	16.81	15.92	18.76	23.52	25.05	26.15	25.38	24.38	24.52	23.35	20.89	15.8
1641.431	16.59	16.83	16.21	18.86	23.92	25.37	26.37	25.91	24.97	24.94	23.49	21.62	15.92
1646.732	16.88	16.9	16.48	19.09	24.11	25.68	26.8	26.12	25.32	25.16	23.96	21.7	16.51
