# Supplementary material
Source: MDPI journal article supplement (https://www.mdpi.com/2072-4292/13/5/1035)
Supplement: s1 [file s1 › supporting_data/Alvord Datasheet.csv]

Sample_Name	Gross_GWC_gperg	Net_GWC_gperg	VWC_volpervol	EC_ds_per_cm	Soil_extract_ppm	CRWI	WISOIL	Residual_water_gperg	sand_pct	silt_pct	clay_pct	US_soil_taxonomy
AHT3-A	0.23	0.01	0.24	0.13	8223	2.03	0.909871245	0.05	9.58	44.31	46.11	Silty Clay
AHT3-B	0.22	0	NoData	NoData	8601	1.25	0.893474624	0.04	12.62	48.63	38.76	Silty Clay Loam
AHT3-C	0.27	0.05	0.26	0.2	7773	2.76	0.868651489	0.04	15.61	58.59	25.8	Silt Loam
AHT3-E	0.36	0.14	0.48	8.8	2760.3	4.18	0.80545809	0.04	16.8	29.03	54.17	Clay
AHT3-G	0.36	0.14	0.46	6.93	2266.5	5.74	0.778485492	0.03	19.82	79.03	1.15	Silt Loam
AHT3-I	0.33	0.11	0.47	5.84	2659.2	5.6	0.776364996	0.04	11.74	57.65	30.6	Silty Clay Loam
AHT3-K	0.27	0.05	0.26	3.25	7554	3.16	0.841851107	0.04	13.14	53.67	33.18	Silty Clay Loam
AHT3-M	0.22	0	0.1	0.07	11592	2.06	1.001226994	0.05	19.01	58.74	22.25	Silt Loam
AHT4-A	0.24	0.02	0.18	0	10947	1.96	0.909871245	0.05	13.4	43.03	43.56	Silty Clay
AHT4-C	0.25	0.03	0.22	2.91	10380	2.09	0.868651489	0.05	15.48	38.96	45.56	Clay
AHT4-E	0.32	0.1	0.58	11.65	1807.5	4.77	0.80545809	0.03	20.13	59.22	20.65	Silt Loam
AHT4-G	0.38	0.16	0.51	7.8	2448	6.22	0.778485492	0.04	10.93	64.65	24.42	Silt loam
AHT4-I	0.4	0.18	0.23	4.86	1506.9	5.83	0.776364996	0.04	15.64	80.71	3.65	Silt
AHT4-K	0.37	0.15	0.56	5.99	3678	4.55	0.841851107	0.03	12.26	62.22	25.52	Silt Loam
AHT4-M	0.25	0.03	0.28	0.6	6879	2	1.001226994	0.04	16.46	42.32	41.21	Silty Clay
