# Supplementary material
Source: MDPI journal article supplement (https://www.mdpi.com/2072-4292/13/5/1035)
Supplement: s1 [file s1 › supporting_data/fly030sec-ahs4-matched.csv]

datetime	rtk_lon_p	rtk_lat_pLat_P	rtk_elev_msl_p	Datetime	940.046	946.742	953.407	960.04	966.642	973.214	979.755	986.266	992.747	999.199	1005.621	1012.015	1018.38	1024.718	1031.027	1037.309	1043.564	1049.792	1055.994	1062.169	1068.319	1074.443	1080.542	1086.616	1092.666	1098.692	1104.694	1110.672	1116.627	1122.559	1128.469	1134.357	1140.223	1146.067	1151.89	1157.693	1163.475	1169.236	1174.978	1180.701	1186.404	1192.088	1197.754	1203.401	1209.031
8/11/19 11:35:04	-118.5134281	42.54328785	1218.690445	8/11/19 11:36:02	1.554444444	1.605555556	1.48	1.151111111	1.741111111	1.198888889	1.335555556	1.658888889	1.576666667	1.394444444	1.588888889	1.341111111	1.111111111	1.468888889	1.35	1.238888889	1.312222222	1.254444444	1.737777778	1.667777778	1.382222222	1.505555556	1.453333333	1.263333333	1.351111111	1.667777778	1.514444444	1.536666667	1.476666667	1.376666667	1.281111111	1.4	1.324444444	1.587777778	1.952222222	1.15	1.223333333	1.895555556	1.275555556	1.747777778	1.243333333	1.531111111	1.052222222	1.302222222	1.492222222
8/11/19 11:35:05	-118.5134288	42.54328661	1218.967474	8/11/19 11:36:03	9.542222222	9.372222222	9.61	9.046666667	9.648888889	9.468888889	9.368888889	9.774444444	9.903333333	9.567777778	9.751111111	9.5	9.493333333	9.741111111	9.562222222	9.536666667	9.482222222	9.383333333	9.874444444	9.943333333	9.543333333	9.637777778	9.526666667	9.491111111	9.471111111	9.757777778	9.607777778	9.625555556	9.608888889	9.461111111	9.314444444	9.337777778	9.055555556	8.984444444	9.157777778	8.842222222	8.23	9.347777778	8.917777778	9.255555556	8.917777778	9.136666667	8.884444444	8.938888889	9.136666667
8/11/19 11:35:06	-118.5134293	42.5432863	1220.00389	8/11/19 11:36:04	6.045555556	5.975555556	5.883333333	5.421111111	6.052222222	5.716666667	5.767777778	6.076666667	5.997777778	5.758888889	5.926666667	5.74	5.697777778	6.048888889	5.912222222	5.793333333	5.775555556	5.714444444	6.167777778	6.247777778	5.826666667	5.995555556	5.86	5.77	5.862222222	6.16	5.997777778	6.061111111	5.942222222	5.885555556	5.804444444	5.906666667	5.553333333	5.8	6.221111111	5.726666667	5.321111111	6.193333333	5.648888889	6.05	5.666666667	5.915555556	5.727777778	5.825555556	5.986666667
8/11/19 11:35:07	-118.5134292	42.54328566	1221.217335	8/11/19 11:36:05	8.822222222	8.725555556	8.562222222	8.191111111	8.928888889	8.611111111	8.612222222	8.902222222	8.95	8.624444444	8.894444444	8.573333333	8.638888889	8.856666667	8.654444444	8.566666667	8.638888889	8.52	8.906666667	8.964444444	8.607777778	8.651111111	8.626666667	8.432222222	8.516666667	8.721111111	8.568888889	8.552222222	8.535555556	8.423333333	8.241111111	8.111111111	8.293333333	8.194444444	8.255555556	7.838888889	7.521111111	8.24	7.93	8.123333333	7.762222222	8.267777778	8.014444444	8.176666667	8.268888889
8/11/19 11:35:08	-118.5134283	42.54328494	1222.261303	8/11/19 11:36:06	10.59888889	10.23555556	10.30111111	10.19222222	10.42888889	10.35444444	10.41444444	10.74111111	10.77444444	10.44111111	10.61666667	10.49	10.41666667	10.55555556	10.37	10.42222222	10.35888889	10.24222222	10.68444444	10.55666667	10.27333333	10.29	10.2	10.05444444	10.10444444	10.35666667	10.08111111	10.21777778	10.09888889	9.977777778	9.743333333	9.68	9.605555556	9.248888889	9.617777778	9.035555556	9.035555556	9.823333333	9.316666667	9.522222222	9.326666667	9.667777778	9.355555556	9.622222222	9.765555556
8/11/19 11:35:09	-118.5134272	42.54328509	1223.349555	8/11/19 11:36:07	10.56222222	10.28	10.1	9.771111111	10.36333333	10.04111111	10.16888889	10.47777778	10.54777778	10.29	10.44666667	10.17222222	10.12333333	10.33666667	10.17	10.14666667	10.09	10.04222222	10.40444444	10.40555556	10.12666667	10.10222222	9.995555556	9.788888889	9.864444444	10.14444444	9.907777778	9.923333333	9.8	9.787777778	9.574444444	9.457777778	9.273333333	9.368888889	9.556666667	8.95	8.686666667	9.363333333	9.411111111	9.517777778	8.782222222	9.303333333	9.155555556	9.358888889	9.612222222
8/11/19 11:35:10	-118.5134283	42.54328593	1224.363071	8/11/19 11:36:08	10.48111111	10.27888889	10.14111111	10.02222222	10.47888889	10.05	10.29444444	10.60777778	10.53333333	10.19777778	10.50555556	10.34111111	10.17111111	10.44555556	10.22333333	10.14666667	10.20111111	10.09333333	10.49333333	10.53222222	9.99	10.13888889	9.977777778	9.912222222	9.887777778	10.11777778	9.961111111	10.02111111	9.83	9.808888889	9.507777778	9.555555556	9.321111111	9.546666667	9.677777778	8.764444444	8.745555556	9.68	9.207777778	9.514444444	9.096666667	9.385555556	9.24	9.335555556	9.626666667
8/11/19 11:35:11	-118.5134328	42.54328778	1225.306461	8/11/19 11:36:09	10.60777778	10.40444444	10.64111111	10.04666667	10.58222222	10.40555556	10.61777778	10.91	10.91777778	10.60444444	10.81777778	10.62444444	10.61555556	10.65333333	10.51333333	10.46222222	10.41111111	10.35	10.78	10.71444444	10.35666667	10.38	10.29555556	10.18111111	10.21111111	10.42	10.28777778	10.29777778	10.08	9.976666667	9.868888889	9.884444444	9.738888889	9.902222222	10.02333333	9.223333333	9.165555556	9.933333333	9.325555556	9.591111111	9.27	9.835555556	9.413333333	9.604444444	9.843333333
8/11/19 11:35:12	-118.5134404	42.54329021	1226.289107	8/11/19 11:36:10	11.43	11.03555556	11.12666667	10.77666667	11.34666667	11.07888889	11.07666667	11.58666667	11.50444444	11.29888889	11.57555556	11.24222222	11.30555556	11.47333333	11.19333333	11.07	11.17555556	11.03666667	11.44	11.41333333	11.06666667	11.15888889	11.05666667	10.89222222	10.84888889	11.03444444	10.92777778	10.97333333	10.86666667	10.74444444	10.45444444	10.44888889	10.36555556	10.32111111	10.43	9.933333333	9.857777778	10.47	10.17888889	10.39777778	10.08777778	10.42555556	10.15111111	10.24222222	10.47555556
8/11/19 11:35:13	-118.5134496	42.54329309	1227.436168	8/11/19 11:36:11	11.81555556	11.54888889	11.65111111	11.23444444	11.87444444	11.51666667	11.55666667	11.93888889	11.94888889	11.67444444	11.83777778	11.56333333	11.58444444	11.84555556	11.56666667	11.56	11.53	11.38888889	11.81444444	11.76222222	11.41	11.50666667	11.28	11.22444444	11.24222222	11.47666667	11.39111111	11.29777778	11.19888889	11.04333333	10.75777778	10.76888889	10.75888889	10.78	10.71555556	9.97	10.18666667	10.81555556	10.60222222	10.65333333	10.32555556	10.68666667	10.59111111	10.77	10.81555556
8/11/19 11:35:14	-118.5134581	42.54329558	1228.727652	8/11/19 11:36:12	11.97888889	11.90666667	11.99	11.63333333	12.11444444	11.94111111	12.08	12.25666667	12.23333333	12.01111111	12.31222222	12.08333333	11.95111111	12.06111111	12.02	11.86	11.96333333	11.77888889	12.04222222	12.19444444	11.76333333	11.80444444	11.65444444	11.59111111	11.48777778	11.75333333	11.65	11.63222222	11.53	11.40777778	11.28444444	11.20888889	10.81888889	10.88666667	10.87444444	10.31222222	9.971111111	11.18888889	10.67333333	10.96666667	10.52666667	11.08555556	10.72888889	11.03222222	11.21555556
8/11/19 11:35:15	-118.5134684	42.54329858	1229.954274	8/11/19 11:36:13	12.18666667	12.08444444	12.07888889	11.60666667	12.22555556	12.00222222	12.15666667	12.37666667	12.27888889	12.11222222	12.36888889	12.07555556	12.01333333	12.20111111	12.00666667	11.95	11.86666667	11.89777778	12.29	12.12666667	11.74666667	11.85333333	11.73111111	11.69666667	11.67222222	11.79777778	11.65	11.66555556	11.62	11.48222222	11.25888889	11.19555556	11.03111111	10.93222222	11.02777778	10.45888889	10.56888889	11.22111111	10.45333333	10.87555556	10.75222222	11.18666667	11.02888889	11.23222222	11.18222222
8/11/19 11:35:16	-118.5134798	42.5433024	1231.085113	8/11/19 11:36:14	12.59777778	12.47111111	12.29666667	12.07444444	12.69222222	12.51555556	12.58555556	12.79555556	12.78111111	12.49777778	12.74111111	12.55444444	12.51	12.64	12.43333333	12.43333333	12.35444444	12.33888889	12.60444444	12.68	12.14666667	12.28333333	12.12333333	11.98333333	12.05777778	12.29444444	12.06444444	12.06333333	11.94	11.86666667	11.76	11.60888889	11.45	11.33666667	11.42444444	10.83888889	10.59777778	11.46888889	11.00111111	11.29222222	11.02333333	11.57333333	11.26555556	11.48666667	11.81
8/11/19 11:35:17	-118.5134914	42.54330641	1231.514597	8/11/19 11:36:15	13.74	13.40666667	13.23	13.23111111	13.69777778	13.30111111	13.51666667	13.80111111	13.83444444	13.50666667	13.79777778	13.62777778	13.56666667	13.71222222	13.45888889	13.39333333	13.35333333	13.22777778	13.65111111	13.56333333	13.15666667	13.29444444	13.19555556	13.10555556	12.96888889	13.13111111	13.00888889	13.02222222	12.88333333	12.89777778	12.56222222	12.60888889	12.25666667	12.41111111	12.33111111	11.87	11.71888889	12.49555556	12.15444444	12.20555556	12.11555556	12.49777778	12.39333333	12.56111111	12.79
8/11/19 11:35:18	-118.5134966	42.54330813	1231.755139	8/11/19 11:36:16	16.12333333	16.13555556	16.04666667	15.77444444	16.18666667	15.87555556	16.07666667	16.30444444	16.28666667	16.06444444	16.31444444	16.06222222	16.01	16.07333333	15.91666667	15.95666667	15.84111111	15.76444444	16.09888889	16.11555556	15.75333333	15.79	15.70666667	15.60333333	15.42777778	15.70888889	15.52888889	15.56555556	15.26666667	15.28333333	15.16666667	15.12	14.93777778	15.01888889	14.78111111	13.83777778	14.22444444	14.84666667	14.82444444	14.64444444	14.32111111	15.02111111	14.80222222	14.91555556	15.17666667
8/11/19 11:35:19	-118.5134965	42.54330823	1232.389619	8/11/19 11:36:17	17.65111111	17.45222222	17.32888889	17.14666667	17.49555556	17.24888889	17.34444444	17.71444444	17.76111111	17.47444444	17.64666667	17.44777778	17.37777778	17.50666667	17.34666667	17.29333333	17.15666667	17.17222222	17.49444444	17.52111111	17.15777778	17.10444444	17.07111111	16.81222222	16.79888889	17.12333333	16.74666667	16.92222222	16.78555556	16.66666667	16.49666667	16.51111111	16.48888889	16.04333333	16.32555556	15.09444444	15.35777778	16.13444444	15.89888889	16.10444444	15.62777778	16.29	15.99777778	16.31	16.54
8/11/19 11:35:20	-118.5134959	42.54330794	1233.168194	8/11/19 11:36:18	20.33333333	20.29888889	20.34	19.89888889	20.34444444	20.10333333	20.27	20.37555556	20.50222222	20.22	20.46888889	20.41666667	20.19666667	20.35	20.08666667	20.09666667	20.09	19.98555556	20.26444444	20.23555556	19.94333333	19.99222222	19.8	19.62222222	19.54222222	19.76444444	19.51222222	19.64888889	19.38222222	19.42444444	19.22555556	19.04888889	19.06333333	18.67666667	18.68333333	17.77222222	17.84555556	18.81333333	18.52222222	18.56	18.27111111	18.96111111	18.72	19.05777778	19.26666667
8/11/19 11:35:21	-118.5134956	42.54330782	1234.079817	8/11/19 11:36:19	22.93333333	22.71444444	22.57555556	22.31666667	22.64222222	22.55444444	22.65111111	22.78333333	22.92	22.68555556	22.86444444	22.59	22.57	22.69111111	22.39333333	22.55666667	22.39	22.36111111	22.62111111	22.60888889	22.29666667	22.23444444	22.13111111	21.93	22.02555556	22.06222222	22.02888889	21.88888889	21.79222222	21.65666667	21.59777778	21.48	21.19	20.83555556	20.52444444	19.88555556	20.10888889	21.05777778	20.70222222	20.78666667	20.46888889	21.03555556	20.94888889	21.12444444	21.40777778
8/11/19 11:35:22	-118.5134954	42.54330776	1234.459232	8/11/19 11:36:20	24.19333333	24.11666667	23.85222222	23.72222222	24.14888889	23.75555556	24.04555556	24.31222222	24.31888889	23.92	24.18666667	24.07222222	24.05	24.07555556	23.91555556	23.88333333	23.93	23.73555556	24.00888889	24.05333333	23.55777778	23.62777778	23.48111111	23.40555556	23.42555556	23.54	23.40111111	23.36666667	23.24666667	23.18888889	22.81333333	22.72444444	22.56	22.19888889	21.87555556	21.18888889	21.15555556	22.02777778	21.88444444	21.75111111	21.69888889	22.36333333	22.30777778	22.57555556	22.76222222
8/11/19 11:35:23	-118.5134953	42.54330749	1234.475977	8/11/19 11:36:21	24.68111111	24.74222222	24.75777778	24.23666667	24.56444444	24.44444444	24.64777778	24.88888889	24.99444444	24.61555556	24.87111111	24.58222222	24.47666667	24.69555556	24.45	24.46333333	24.39888889	24.26333333	24.55555556	24.55333333	24.19	24.23888889	24.05555556	23.93333333	23.89	24.00666667	23.83444444	24.02555556	23.73	23.63111111	23.58555556	23.23555556	23.08666667	22.52888889	22.61	21.68777778	21.88777778	22.78	22.30111111	22.45	22.46666667	22.81444444	22.84111111	23.05777778	23.37777778
8/11/19 11:35:24	-118.5134954	42.54330731	1234.479361	8/11/19 11:36:22	24.87222222	24.53333333	24.56222222	24.16888889	24.57888889	24.41555556	24.66222222	24.87111111	24.94111111	24.64111111	24.81777778	24.61444444	24.54	24.67333333	24.46666667	24.48	24.42777778	24.30333333	24.47222222	24.5	24.25333333	24.23444444	24.15	23.88444444	23.97555556	24.08111111	23.83	23.88555556	23.76555556	23.65666667	23.44	23.42222222	23.02555556	22.87666667	22.53777778	21.78333333	21.96	22.74444444	22.43222222	22.36666667	22.31777778	22.89666667	22.89	23.19	23.29
8/11/19 11:35:25	-118.5134993	42.54330838	1234.466926	8/11/19 11:36:23	24.26444444	24.19222222	24.07111111	23.90444444	24.33	24	24.22444444	24.46444444	24.54777778	24.14666667	24.38111111	24.19444444	24.15555556	24.22888889	23.99888889	23.97	23.89333333	23.94	24.14333333	24.17555556	23.74222222	23.89666667	23.65222222	23.45444444	23.56	23.66444444	23.44666667	23.44666667	23.29666667	23.22777778	23.00666667	22.91555556	22.62	22.37444444	22.09	20.97666667	21.33555556	22.16666667	21.90777778	22.17666667	22.17222222	22.49444444	22.49	22.73333333	22.85
8/11/19 11:35:26	-118.5135081	42.54331112	1234.428663	8/11/19 11:36:24	24.83111111	24.83888889	24.63555556	24.31333333	24.67888889	24.38888889	24.84555556	24.84333333	24.96555556	24.69	24.95666667	24.67777778	24.53333333	24.67888889	24.53333333	24.57888889	24.44333333	24.25	24.62888889	24.53	24.22333333	24.28111111	24.19	24.04555556	23.95555556	24.16333333	23.90222222	23.98666667	23.86444444	23.79777778	23.55888889	23.46222222	23.22444444	22.80444444	22.53888889	21.61	22.04333333	22.99444444	22.39333333	22.48777778	22.42333333	23.13	22.92111111	23.13666667	23.52888889
8/11/19 11:35:27	-118.5135188	42.54331475	1234.389265	8/11/19 11:36:25	25.92666667	25.87111111	25.85	25.43888889	25.69333333	25.62777778	25.81888889	26.11888889	26.04333333	25.72666667	25.98111111	25.73333333	25.72888889	25.93444444	25.63333333	25.79333333	25.53888889	25.45666667	25.79666667	25.75333333	25.48	25.43111111	25.30555556	25.22444444	25.13555556	25.35777778	25.14	25.15777778	24.89	24.79777778	24.64111111	24.72	24.36888889	23.94666667	23.53333333	22.73666667	23.12888889	23.71666667	23.77333333	23.68888889	23.76555556	24.16333333	24.11555556	24.46777778	24.57111111
8/11/19 11:35:28	-118.513532	42.5433191	1234.380135	8/11/19 11:36:26	27.83	27.41777778	27.21888889	27.23222222	27.48777778	27.28555556	27.57444444	27.75888889	27.82111111	27.61444444	27.73111111	27.55333333	27.49888889	27.65444444	27.36	27.52	27.40222222	27.39	27.65111111	27.64555556	27.19333333	27.32111111	27.20333333	27.07555556	27.09888889	27.10777778	26.93777778	26.98888889	26.84111111	26.72666667	26.56888889	26.40888889	26.15666667	25.82444444	25.22222222	24.33444444	24.56888889	25.66555556	25.41222222	25.45111111	25.36222222	25.97666667	25.98	26.35	26.56222222
8/11/19 11:35:29	-118.5135467	42.54332374	1234.3759	8/11/19 11:36:27	28.81444444	28.80666667	28.83444444	28.54555556	28.84777778	28.69333333	28.83555556	29.00777778	29.13666667	28.90555556	29.05666667	28.95888889	28.90555556	29.02333333	28.76	28.81666667	28.73111111	28.77333333	28.97444444	28.92222222	28.65444444	28.73	28.49666667	28.34222222	28.29444444	28.44888889	28.21111111	28.27	28.20222222	28.12888889	27.89222222	27.79111111	27.54777778	26.94444444	26.42	25.60888889	25.77777778	26.94111111	26.49333333	26.65888889	26.91222222	27.33555556	27.48777778	27.66888889	27.83333333
8/11/19 11:35:30	-118.513562	42.54332835	1234.357263	8/11/19 11:36:28	28.18666667	28.04777778	27.92111111	27.71888889	28.15555556	27.73666667	27.99111111	28.19666667	28.31222222	28.12	28.17777778	28.17	28.02555556	28.09555556	27.86777778	27.92666667	27.90222222	27.85111111	28.10333333	28.11	27.84	27.86888889	27.59444444	27.58666667	27.54333333	27.54333333	27.46777778	27.56222222	27.26555556	27.22333333	27.18777778	26.89777778	26.63777778	26.24444444	25.75	24.84222222	25.20555556	26.34222222	25.85111111	26.06888889	25.98444444	26.61555556	26.54222222	26.99444444	27.20333333
8/11/19 11:35:31	-118.5135783	42.54333336	1234.344556	8/11/19 11:36:29	25.94777778	25.72888889	25.71222222	25.47666667	25.94333333	25.65777778	25.83444444	26.00777778	26.16666667	25.90444444	26.15111111	25.87888889	25.84111111	26.04555556	25.77333333	25.77555556	25.71	25.65111111	25.90777778	25.89444444	25.57666667	25.58777778	25.38888889	25.31333333	25.32555556	25.51111111	25.29555556	25.29	25.18666667	25.09666667	24.86111111	24.76444444	24.59111111	23.98666667	23.86111111	23.08777778	23.03666667	24.39222222	23.62444444	24.00111111	23.98222222	24.45	24.34555556	24.72	24.83
8/11/19 11:35:32	-118.5135949	42.54333865	1234.356767	8/11/19 11:36:30	24.15444444	24.14666667	24.15666667	23.88444444	24.18111111	23.89888889	24.14777778	24.28444444	24.42444444	24.05777778	24.33222222	24.07222222	24.05777778	24.24111111	23.99888889	24.03666667	23.90555556	23.82222222	24.17	24.14555556	23.81666667	23.91555556	23.79444444	23.58111111	23.63555556	23.69222222	23.64666667	23.66222222	23.50333333	23.51	23.11777778	22.95111111	23.01666667	22.61777778	22.47888889	21.27777778	21.65333333	22.64888889	22.35555556	22.16888889	22.02111111	22.72333333	22.65	22.93555556	23.24888889
8/11/19 11:35:33	-118.5136094	42.54334324	1234.384984	8/11/19 11:36:31	24.86555556	24.74888889	25.09333333	24.60222222	24.86	24.58	24.91	25.06111111	25.10777778	24.69666667	25.09888889	24.75777778	24.70111111	24.98888889	24.68777778	24.76222222	24.61555556	24.46555556	24.85222222	24.88111111	24.45222222	24.60888889	24.43555556	24.28666667	24.33666667	24.48	24.38777778	24.30666667	24.25333333	24.03	24.04555556	23.87555556	23.81222222	23.31	23.15555556	22.19222222	22.34222222	23.41333333	23.1	23.08111111	22.77444444	23.45444444	23.51666667	23.88333333	23.90111111
8/11/19 11:35:34	-118.5136201	42.54334648	1234.40164	8/11/19 11:36:32	23.96222222	23.79777778	23.81111111	23.50222222	23.77777778	23.43888889	23.82333333	23.86555556	24.05777778	23.66111111	24.01333333	23.74555556	23.68333333	23.83111111	23.67444444	23.67666667	23.64222222	23.52888889	23.76222222	23.84444444	23.45444444	23.46777778	23.36555556	23.25888889	23.23333333	23.42777778	23.13555556	23.32	23.09888889	23.04666667	22.84555556	22.80888889	22.63444444	22.45666667	22.25222222	21.36444444	21.56777778	22.23555556	22.03333333	22.13111111	21.80666667	22.47555556	22.25888889	22.67333333	22.85777778
8/11/19 11:35:35	-118.5136374	42.54335229	1234.458694	8/11/19 11:36:33	23.81555556	23.7	23.63333333	23.19777778	23.74444444	23.40333333	23.57888889	23.80888889	23.81555556	23.57222222	23.83555556	23.60222222	23.51666667	23.70444444	23.42	23.49	23.48222222	23.36333333	23.72555556	23.75333333	23.35666667	23.44666667	23.27111111	23.13444444	23.09222222	23.28444444	23.09666667	23.25333333	22.97777778	23.03111111	22.75111111	22.62666667	22.55555556	22.30222222	22.04	21.51111111	21.34444444	22.08444444	21.92222222	22.04666667	21.71333333	22.38444444	22.33444444	22.47777778	22.86
8/11/19 11:35:36	-118.5136646	42.54336105	1234.48669	8/11/19 11:36:34	25.03666667	25.13555556	25.05111111	24.46444444	24.96666667	24.62888889	25.09777778	25.11555556	25.19	25.01333333	25.16888889	24.96222222	24.88444444	25.06666667	25.03444444	25.04222222	24.88666667	24.82111111	25.12333333	25.10444444	24.83222222	24.92111111	24.73	24.67444444	24.64777778	24.71666667	24.55444444	24.66555556	24.49777778	24.45111111	24.24666667	24.25333333	23.97666667	23.77	23.04555556	22.29888889	22.60555556	23.43555556	23.40555556	23.37666667	23.30888889	23.80666667	23.75333333	24.13333333	24.32888889
8/11/19 11:35:37	-118.5136982	42.54337165	1234.506452	8/11/19 11:36:35	26.23	26.22333333	26.08555556	25.86666667	26.30333333	25.87222222	26.32	26.33444444	26.47666667	26.34333333	26.62111111	26.30111111	26.27555556	26.43222222	26.21666667	26.30666667	26.28444444	26.20333333	26.53666667	26.39222222	26.09666667	26.19888889	26.14222222	25.91333333	26.01333333	26.09111111	25.95888889	26.00555556	25.84222222	25.78666667	25.72666667	25.51555556	25.24888889	24.73666667	24.29666667	23.57666667	23.84	24.76444444	24.48	24.60666667	24.62777778	25.28	25.11777778	25.52666667	25.68111111
8/11/19 11:35:38	-118.5137318	42.54338234	1234.490274	8/11/19 11:36:36	26.43	26.20555556	26.27666667	26.03333333	26.36	26.15111111	26.38444444	26.67111111	26.88222222	26.43333333	26.69222222	26.53	26.42222222	26.60777778	26.43333333	26.49	26.43777778	26.29222222	26.62888889	26.61444444	26.35333333	26.41555556	26.20444444	26.10666667	26.15444444	26.34888889	26.09888889	26.12666667	26.00333333	25.99666667	25.88555556	25.58666667	25.59111111	25.03555556	24.49111111	23.91555556	24.09222222	24.92222222	24.84666667	24.88333333	24.69555556	25.38555556	25.29555556	25.63333333	26.03777778
8/11/19 11:35:39	-118.5137536	42.54338928	1234.404363	8/11/19 11:36:37	27.22222222	27.32888889	26.99333333	26.88777778	27.17666667	27.06111111	27.32888889	27.46888889	27.61444444	27.34333333	27.52777778	27.41111111	27.35888889	27.49	27.29333333	27.3	27.36111111	27.18555556	27.46555556	27.45666667	27.17333333	27.20555556	27.22888889	27.06444444	27.04777778	27.08888889	26.91222222	26.98555556	26.76777778	26.79666667	26.63555556	26.37333333	26.27111111	25.48	25.35444444	24.23777778	24.69222222	25.75444444	25.46555556	25.61888889	25.63888889	26.16888889	26.27444444	26.58555556	26.76111111
8/11/19 11:35:40	-118.5137595	42.54339138	1234.340787	8/11/19 11:36:38	26.57222222	26.45111111	26.33222222	26.16444444	26.35666667	26	26.42555556	26.55222222	26.79222222	26.46777778	26.73666667	26.53666667	26.45777778	26.56222222	26.41666667	26.42333333	26.37666667	26.30444444	26.64666667	26.67888889	26.28666667	26.41	26.30555556	26.07222222	26.15888889	26.27	26.16	26.11333333	25.97111111	25.94333333	25.77333333	25.72888889	25.47555556	25.05777778	24.42888889	23.59666667	24.00777778	24.90888889	24.60444444	24.70777778	24.79888889	25.29888889	25.41333333	25.73555556	25.92111111
8/11/19 11:35:41	-118.513767	42.54339422	1234.376558	8/11/19 11:36:39	26.27555556	26.06333333	26.28444444	25.84888889	26.22555556	26.03888889	26.29555556	26.50777778	26.65	26.28666667	26.52111111	26.23555556	26.23444444	26.48	26.35333333	26.31666667	26.36	26.19	26.55222222	26.48555556	26.27333333	26.22666667	26.08	26.02777778	26.08666667	26.15111111	26.12444444	26.05777778	25.92888889	25.92333333	25.66333333	25.54222222	25.33111111	24.64888889	24.50111111	23.98555556	23.74555556	25.04666667	24.43111111	24.81444444	24.59	25.35666667	25.38888889	25.65888889	25.83444444
8/11/19 11:35:42	-118.5137784	42.54339802	1234.423655	8/11/19 11:36:40	26.91	26.96444444	26.87	26.58111111	26.81222222	26.74	27.06	27.10111111	27.38555556	27.00222222	27.35111111	27.14222222	27.07888889	27.29555556	27.06	27.15	27.17222222	27.10111111	27.36222222	27.40444444	27.08333333	27.18111111	27.05555556	26.85222222	26.85333333	26.88555556	26.86666667	26.83666667	26.67888889	26.68	26.47888889	26.42666667	26.26333333	25.67888889	25.04	24.29555556	24.50444444	25.80444444	25.37222222	25.62	25.41888889	26.05555556	26.04555556	26.57777778	26.70333333
8/11/19 11:35:43	-118.5137922	42.54340275	1234.4806	8/11/19 11:36:41	27.527	27.296	27.347	27.039	27.339	27.188	27.442	27.589	27.713	27.489	27.683	27.607	27.433	27.713	27.513	27.536	27.455	27.407	27.745	27.683	27.443	27.433	27.291	27.222	27.186	27.284	27.239	27.254	27.055	27.013	26.968	26.84	26.389	25.532	25.664	24.717	25.035	26.068	25.684	25.881	26.032	26.586	26.661	27.017	27.199
8/11/19 11:35:44	-118.5138087	42.54340856	1234.469229	8/11/19 11:36:42	26.60875	26.44625	26.41	26.1725	26.54875	26.395	26.49125	26.6575	26.74875	26.5	26.72875	26.5125	26.48125	26.68625	26.505	26.4725	26.4675	26.3475	26.68875	26.6725	26.43125	26.44375	26.23625	26.205	26.0925	26.37875	26.11	26.27875	26.08375	26.04375	25.8825	25.66	25.31125	24.94625	24.655	23.70875	23.905	25.16875	24.48875	24.905	24.96	25.55	25.57	25.68125	26.1175
8/11/19 11:35:45	-118.5138288	42.54341576	1234.430694	8/11/19 11:36:43	25.519	25.345	25.257	24.977	25.452	25.101	25.259	25.529	25.693	25.367	25.671	25.442	25.267	25.514	25.332	25.37	25.295	25.256	25.584	25.559	25.223	25.226	25.295	24.946	25.06	25.121	25.053	25.07	24.849	24.913	24.667	24.56	24.198	23.975	23.78	22.795	23.056	24.03	23.758	23.769	23.692	24.356	24.379	24.63	24.833
8/11/19 11:35:46	-118.513851	42.5434232	1234.399632	8/11/19 11:36:44	26.45222222	26.42111111	26.27	25.92444444	26.26666667	26.37333333	26.33666667	26.63888889	26.65444444	26.38555556	26.69888889	26.42111111	26.44666667	26.54333333	26.32666667	26.39666667	26.27666667	26.27333333	26.64	26.63333333	26.31666667	26.30888889	26.18	25.97666667	26.12888889	26.19333333	26.12	26.10666667	25.91444444	25.99333333	25.74777778	25.52444444	25.17888889	24.76777778	24.30666667	23.71333333	23.74555556	25.01111111	24.33	24.89555556	24.59666667	25.23555556	25.22	25.74222222	25.85444444
8/11/19 11:35:47	-118.5138739	42.54343053	1234.407771	8/11/19 11:36:45	27.63	27.27666667	27.33444444	27.27222222	27.38333333	27.35666667	27.37777778	27.71333333	27.84111111	27.46777778	27.78333333	27.54111111	27.50111111	27.72666667	27.48	27.53333333	27.46111111	27.39111111	27.72333333	27.67777778	27.34333333	27.39222222	27.24222222	27.11888889	27.17333333	27.30777778	27.17777778	27.04333333	27.03777778	26.92888889	26.81444444	26.65333333	26.38222222	25.86555556	25.34222222	24.43333333	24.70888889	25.81111111	25.81888889	25.74111111	25.72666667	26.27111111	26.40444444	26.76555556	27.02222222
8/11/19 11:35:48	-118.5138966	42.54343805	1234.419063	8/11/19 11:36:46	29	28.69555556	28.90222222	28.63333333	28.98777778	28.73222222	28.97666667	29.20555556	29.31222222	29.02333333	29.22444444	29.13444444	29.03222222	29.22777778	29.02777778	29.05666667	29.01222222	28.93111111	29.16444444	29.26333333	28.80555556	28.91555556	28.74222222	28.67555556	28.70222222	28.82333333	28.64111111	28.61777778	28.52444444	28.42222222	28.44777778	28.10222222	27.74888889	27.13777778	26.80555556	26.09777778	26.25444444	27.49888889	27.01666667	27.26222222	27.30222222	28.02666667	28.11444444	28.39777778	28.65222222
8/11/19 11:35:49	-118.5139198	42.54344572	1234.393635	8/11/19 11:36:47	29.45222222	29.46	29.36666667	29.06	29.30666667	29.26444444	29.50777778	29.62222222	29.84777778	29.62111111	29.87111111	29.61333333	29.54333333	29.65111111	29.53333333	29.51666667	29.53	29.54777778	29.75444444	29.74666667	29.41333333	29.38333333	29.22777778	29.17444444	29.25222222	29.22777778	29.14111111	29.12111111	29.06333333	28.93888889	28.73333333	28.63555556	28.18666667	27.77333333	27.29444444	26.31222222	26.63666667	28.02777778	27.60444444	27.72444444	27.77333333	28.40666667	28.61444444	28.82444444	29.2
8/11/19 11:35:50	-118.5139438	42.54345362	1234.355758	8/11/19 11:36:48	29.85111111	30.02	29.87555556	29.75333333	30.00444444	29.82555556	29.94222222	30.23888889	30.51666667	30.04333333	30.37222222	30.16777778	29.99666667	30.25222222	30.17	30.13333333	30.04111111	30.02222222	30.27333333	30.27333333	29.92	29.99444444	29.86555556	29.74666667	29.72	29.82222222	29.65888889	29.65888889	29.39333333	29.42777778	29.39222222	29.05777778	28.80333333	28.11111111	27.7	27.16888889	27.23666667	28.51222222	27.89666667	28.18777778	28.24444444	29.04333333	29.10111111	29.54444444	29.61777778
8/11/19 11:35:51	-118.513968	42.54346157	1234.352767	8/11/19 11:36:49	32.05888889	32.08444444	31.96333333	31.85888889	32.15	31.98777778	32.34333333	32.36111111	32.58333333	32.29888889	32.46888889	32.47111111	32.31888889	32.45333333	32.46222222	32.4	32.28222222	32.32111111	32.46	32.51666667	32.16333333	32.20555556	31.93666667	31.81	31.84666667	31.83111111	31.78111111	31.69666667	31.66888889	31.50666667	31.40444444	31.23111111	30.98666667	30.31	29.78555556	29.04888889	29.38555556	30.22777778	30.07444444	30.25666667	30.22333333	31.12	31.08888889	31.46222222	31.59222222
8/11/19 11:35:52	-118.5139927	42.54346971	1234.359635	8/11/19 11:36:50	32.14111111	32.16666667	32.12444444	31.95444444	32.27555556	32.23111111	32.26222222	32.47777778	32.79666667	32.34333333	32.74333333	32.66888889	32.45777778	32.63777778	32.52	32.40222222	32.41111111	32.33555556	32.42888889	32.62777778	32.17	32.42333333	32.03555556	31.91333333	31.90444444	31.94444444	31.84111111	31.84	31.67555556	31.55777778	31.43333333	31.30222222	30.99222222	30.18222222	29.71444444	29.06777778	29.40444444	30.66777778	30.02666667	30.39888889	30.32333333	31.13333333	31.17777778	31.49111111	31.62222222
8/11/19 11:35:53	-118.5140192	42.54347824	1234.404558	8/11/19 11:36:51	32.65	32.36777778	32.46777778	32.15555556	32.60777778	32.48444444	32.65222222	32.79333333	33.07666667	32.66555556	33.05111111	32.89333333	32.73555556	32.91	32.72666667	32.73777778	32.67444444	32.55555556	32.76111111	32.91333333	32.44333333	32.54888889	32.27111111	32.12888889	32.11	32.20444444	32.11444444	32.12333333	31.85111111	31.87888889	31.61888889	31.4	30.98111111	30.52888889	30.12222222	29.22444444	29.49888889	30.91666667	30.47333333	30.81	30.93333333	31.44	31.31666667	31.65111111	31.72888889
8/11/19 11:35:54	-118.5140475	42.54348703	1234.440552	8/11/19 11:36:52	31.00888889	31.18555556	30.90666667	30.88444444	31.18222222	31.03777778	31.14777778	31.42777778	31.63	31.32444444	31.65333333	31.46555556	31.34222222	31.47555556	31.38333333	31.41666667	31.21	31.24888889	31.37444444	31.56444444	31.04333333	31.22333333	30.85444444	30.74444444	30.82888889	30.91333333	30.73222222	30.76333333	30.53555556	30.57444444	30.32555556	30.08444444	29.85333333	29.20777778	29.20555556	28.26	28.27333333	29.37888889	29.11888889	29.43555556	29.36444444	29.88888889	29.89777778	30.34333333	30.43444444
8/11/19 11:35:55	-118.5140765	42.54349631	1234.443016	8/11/19 11:36:53	33.96333333	33.72	33.81222222	33.52666667	33.82555556	33.95222222	34.08555556	34.18333333	34.45333333	34.21555556	34.57	34.46	34.25888889	34.38888889	34.10888889	34.17333333	34.19	33.99	34.24444444	34.31444444	33.90111111	33.85444444	33.74111111	33.58	33.56888889	33.64444444	33.42111111	33.51222222	33.26777778	33.20444444	33.04777778	32.70222222	32.38	31.89888889	31.38111111	30.75333333	30.97666667	32.13555556	31.63222222	31.88777778	31.95111111	32.66888889	32.65111111	33.05777778	33.07666667
8/11/19 11:35:56	-118.5141057	42.54350576	1234.416857	8/11/19 11:36:54	35.37888889	35.44222222	35.52222222	35.25222222	35.54444444	35.49	35.60666667	35.81111111	36	35.82111111	36.19777778	35.86222222	35.70777778	35.97	35.69666667	35.71333333	35.62777778	35.51555556	35.76777778	35.77333333	35.52333333	35.54333333	35.25555556	35.23111111	35.34555556	35.34777778	35.03666667	35.08555556	34.91222222	34.71666667	34.52555556	34.44444444	33.85666667	33.48555556	32.84444444	32.38	32.39555556	33.74555556	33.33444444	33.56222222	33.52888889	34.16222222	34.20666667	34.66666667	34.51888889
8/11/19 11:35:57	-118.5141357	42.54351526	1234.381003	8/11/19 11:36:55	35.95	35.88333333	35.89444444	35.58666667	36.08	36.15444444	36.28777778	36.40222222	36.69444444	36.47555556	36.66777778	36.50666667	36.34888889	36.56222222	36.32333333	36.36666667	36.39888889	36.15222222	36.48	36.32222222	36.12333333	36.14666667	35.97222222	35.96333333	35.91666667	35.92222222	35.83	35.85222222	35.49	35.36444444	35.29333333	35.02222222	34.42333333	33.97888889	33.23222222	32.86666667	32.8	34.29666667	33.87333333	34.23888889	34.28333333	34.96777778	34.87777778	35.13	35.32555556
8/11/19 11:35:58	-118.5141672	42.5435254	1234.33891	8/11/19 11:36:56	34.87333333	34.58222222	34.64222222	34.39111111	34.91222222	34.75222222	34.90111111	35.09111111	35.33222222	35.01444444	35.29555556	35.09555556	35.01888889	35.16111111	34.99333333	35.00666667	35.04666667	34.80555556	35.06555556	34.96777778	34.79777778	34.84111111	34.56777778	34.52666667	34.51555556	34.58111111	34.29777778	34.33444444	34.13666667	33.88555556	33.85666667	33.63555556	33.15888889	32.73555556	32.41888889	31.46333333	31.79111111	32.96111111	32.54777778	32.86888889	32.76111111	33.50222222	33.59333333	33.94222222	33.82333333
8/11/19 11:35:59	-118.5141993	42.54353578	1234.326342	8/11/19 11:36:57	31.17888889	31.02111111	31.09777778	30.86	31.06888889	31.15111111	31.17111111	31.39222222	31.72888889	31.34222222	31.51444444	31.42	31.26888889	31.46777778	31.25333333	31.33777778	31.24444444	31.29	31.38666667	31.57666667	31.15	31.16666667	30.96444444	30.85666667	30.78555556	30.86111111	30.73	30.67666667	30.59777778	30.56666667	30.35888889	30.24444444	29.80444444	29.19222222	28.84	28.27111111	28.36666667	29.69777778	28.79666667	29.57888889	29.40222222	30.01333333	30.01222222	30.44333333	30.47777778
8/11/19 11:36:00	-118.5142312	42.54354605	1234.349619	8/11/19 11:36:58	26.18333333	26.16888889	25.97111111	25.86666667	26.09222222	26.12333333	26.16666667	26.44	26.59	26.10666667	26.53666667	26.21111111	26.15777778	26.28555556	26.05333333	26.15	26.06333333	25.94888889	26.34222222	26.14777778	25.97222222	25.98888889	25.83555556	25.76222222	25.77666667	25.84111111	25.77222222	25.76333333	25.43444444	25.53666667	25.40666667	25.24888889	24.75	24.41333333	24.42	23.77	23.58888889	24.94111111	24.3	24.59222222	24.60222222	25.23333333	25.14444444	25.36333333	25.39555556
8/11/19 11:36:01	-118.5142624	42.54355613	1234.35114	8/11/19 11:36:59	20.02888889	19.90444444	20.06888889	19.56555556	20.13222222	19.76111111	19.94444444	20.10444444	20.14444444	19.82777778	20.04	19.71333333	19.68	19.89888889	19.70777778	19.57333333	19.70555556	19.56777778	19.94111111	19.78	19.49555556	19.51222222	19.37888889	19.30222222	19.31777778	19.51555556	19.34666667	19.27555556	19.21666667	19.22666667	19.03555556	19.03555556	18.52333333	18.42777778	18.57222222	17.80111111	17.78777778	18.82555556	18.25666667	18.61111111	18.12666667	18.69222222	18.61555556	18.73111111	18.89777778
8/11/19 11:36:02	-118.5142931	42.543566	1234.341177	8/11/19 11:37:00	19.71	19.80777778	19.61777778	19.35111111	19.9	19.40222222	19.49333333	19.70444444	19.93	19.51777778	19.76	19.37111111	19.31666667	19.62555556	19.18	19.22666667	19.18888889	19.06888889	19.47666667	19.31555556	19.01666667	19.01333333	18.98222222	18.81888889	18.74444444	19.00888889	18.82444444	18.82111111	18.60555556	18.72	18.41888889	18.44444444	18.19	18.17666667	17.96333333	17.23444444	17.45222222	18.33666667	17.52111111	17.99666667	17.64333333	18.22111111	18.10111111	18.09	18.28444444
8/11/19 11:36:03	-118.5143214	42.543575	1234.325936	8/11/19 11:37:01	20.30444444	20.16333333	19.96555556	19.66	20.06666667	19.74222222	19.82	19.93333333	20.14666667	19.80111111	20.04555556	19.66444444	19.56666667	19.7	19.56222222	19.5	19.47666667	19.32555556	19.76111111	19.59444444	19.31333333	19.36666667	19.1	19.10777778	19.08222222	19.19111111	19.14888889	19.08111111	18.87	19.02777778	18.81555556	18.67111111	18.28	18.5	18.18666667	17.64666667	17.75333333	18.43333333	18.01444444	18.46666667	17.88222222	18.39666667	18.23888889	18.42222222	18.59222222
8/11/19 11:36:04	-118.5143523	42.54358513	1234.31397	8/11/19 11:37:02	20.85111111	20.84	20.81888889	20.22666667	20.71444444	20.53	20.56888889	20.79	20.80333333	20.41777778	20.76444444	20.5	20.30333333	20.57111111	20.25222222	20.25666667	20.33222222	20	20.50222222	20.36222222	20.10666667	20.04444444	19.95	19.81777778	19.84888889	19.85666667	19.86444444	19.76444444	19.67	19.67222222	19.52222222	19.46222222	19.15444444	19.08	19.15444444	18.48111111	18.40555556	19.14888889	18.69	18.89555556	18.50888889	19.02666667	18.96444444	19.12333333	19.15111111
8/11/19 11:36:05	-118.5143865	42.54359639	1234.320217	8/11/19 11:37:03	23.77777778	23.66444444	23.42	23.19777778	23.48333333	23.32888889	23.44777778	23.59555556	23.64	23.21777778	23.57555556	23.22777778	23.08222222	23.23333333	23.06777778	23.03	22.98888889	22.79555556	23.15444444	23.06888889	22.68222222	22.70666667	22.54777778	22.46	22.49111111	22.50111111	22.42888889	22.40444444	22.30888889	22.13333333	22.10777778	21.96	21.74555556	21.88333333	21.74444444	20.65444444	20.87666667	21.46555556	21.38222222	21.40222222	20.94666667	21.48444444	21.34666667	21.57555556	21.63444444
8/11/19 11:36:06	-118.5144155	42.54360579	1234.341456	8/11/19 11:37:04	28.74111111	29.01555556	28.88	28.27222222	28.68777778	28.39888889	28.63666667	28.77111111	28.92888889	28.50777778	28.75666667	28.49111111	28.28888889	28.50666667	28.32777778	28.29666667	28.26222222	28.06	28.31222222	28.22333333	27.95666667	27.91555556	27.66222222	27.59333333	27.60888889	27.65888889	27.56888889	27.44	27.26555556	27.28444444	27.17333333	26.96444444	26.64666667	26.53222222	26.28888889	25.28	25.39333333	26.51333333	26.21777778	26.23555556	25.80111111	26.18333333	26.22444444	26.45222222	26.57
8/11/19 11:36:07	-118.5144483	42.54361635	1234.401114	8/11/19 11:37:05	33.43666667	33.32666667	33.19555556	33.06777778	33.18666667	32.97666667	33.21444444	33.21444444	33.46111111	33.10111111	33.37333333	33.24222222	33.04333333	33.23888889	32.92777778	32.94555556	32.84444444	32.79666667	32.81888889	32.93	32.52444444	32.64333333	32.29888889	32.04333333	32.11222222	32.10111111	31.84555556	31.85888889	31.74777778	31.80777778	31.52555556	31.20444444	30.83888889	30.65777778	30.31444444	29.69111111	29.57333333	30.45222222	30.27777778	30.42333333	29.94222222	30.56	30.33888889	30.62333333	30.78888889
8/11/19 11:36:08	-118.5144848	42.54362845	1234.453358	8/11/19 11:37:06	34.63	34.37444444	34.38222222	34.09333333	34.50666667	34.37	34.31888889	34.53666667	34.57444444	34.47777778	34.58333333	34.40111111	34.33333333	34.48777778	34.19	34.15	34.13111111	33.93111111	34.23555556	34.00222222	33.81333333	33.75444444	33.53666667	33.24111111	33.43777778	33.16444444	32.95888889	32.96888889	32.77222222	32.77666667	32.66777778	32.48444444	32.06111111	31.53555556	31.54444444	30.74333333	30.75222222	31.67333333	31.24888889	31.45444444	31.28555556	31.72777778	31.67555556	31.78333333	31.75777778
8/11/19 11:36:09	-118.5145179	42.5436393	1234.419993	8/11/19 11:37:07	33.46	33.47444444	33.25888889	33.13111111	33.11888889	33.00333333	33.16777778	33.13666667	33.46666667	33.02333333	33.31777778	33.08222222	32.99555556	33.12555556	32.81666667	32.90333333	32.70222222	32.61666667	32.76777778	32.86	32.35666667	32.36333333	32.20333333	31.96666667	31.9	31.94111111	31.79333333	31.82555556	31.50888889	31.57666667	31.36777778	31.14666667	30.78444444	30.53	30.47666667	29.52444444	29.85444444	30.50222222	30.13666667	30.52111111	30.06111111	30.26222222	30.22222222	30.52	30.59555556
8/11/19 11:36:10	-118.5145511	42.54365014	1234.362697	8/11/19 11:37:08	29.71888889	29.75111111	29.72111111	29.14777778	29.48	29.32555556	29.39	29.59333333	29.66666667	29.32222222	29.44444444	29.13333333	29.07666667	29.19333333	29.00666667	28.94	28.93555556	28.75111111	29.11666667	28.85222222	28.59888889	28.60222222	28.35222222	28.27777778	28.20111111	28.32111111	28.17666667	28.01111111	27.98333333	27.84	27.85777778	27.68888889	27.37333333	27.20222222	27.06111111	26.24333333	26.39444444	27.18222222	26.9	26.90222222	26.72	27.08777778	26.94222222	26.97444444	27.04888889
8/11/19 11:36:11	-118.5145858	42.54366144	1234.334942	8/11/19 11:37:09	31.48111111	31.41	31.23444444	31.19777778	31.24333333	31.13777778	31.32666667	31.35666667	31.48555556	31.13888889	31.35888889	31.27888889	30.98444444	31.08	30.96333333	30.89222222	30.76111111	30.69555556	30.86222222	30.92666667	30.28111111	30.50444444	30.26666667	30.09666667	30.00555556	30.07888889	29.94888889	29.91333333	29.66777778	29.69666667	29.45888889	29.31111111	29.11555556	29.06333333	28.41333333	27.88111111	28.01111111	28.71	28.44333333	28.65888889	28.22777778	28.67111111	28.59555556	28.72333333	28.87666667
8/11/19 11:36:12	-118.5146209	42.54367278	1234.352816	8/11/19 11:37:10	31.58666667	31.77333333	31.55444444	31.50555556	31.52777778	31.44888889	31.52777778	31.59111111	31.82444444	31.47777778	31.78111111	31.42111111	31.14555556	31.44888889	31.11333333	31.09	31.07222222	30.86222222	31.20666667	31.17555556	30.79333333	30.8	30.48333333	30.42666667	30.34666667	30.33111111	30.17666667	30.17777778	30.03	29.94333333	29.71333333	29.48	29.13222222	28.82888889	28.82	28.05333333	28.12444444	28.79444444	28.44333333	28.87111111	28.52777778	28.80777778	28.55	28.84444444	28.86333333
8/11/19 11:36:13	-118.5146564	42.54368435	1234.415742	8/11/19 11:37:11	34.04555556	33.88444444	33.73555556	33.53333333	33.66111111	33.52111111	33.71666667	33.86111111	33.99111111	33.65444444	33.94777778	33.80222222	33.56666667	33.70444444	33.47777778	33.64111111	33.42	33.25888889	33.49111111	33.42222222	33.11333333	33.12111111	32.84	32.57333333	32.59333333	32.64666667	32.45111111	32.34666667	32.20888889	32.23	31.96555556	31.83111111	31.32777778	31.24	30.86222222	30.22666667	30.15333333	30.97888889	30.76333333	30.90888889	30.5	30.97111111	30.90555556	31.02333333	31.01777778
8/11/19 11:36:14	-118.5146912	42.54369571	1234.46841	8/11/19 11:37:12	33.51888889	33.43666667	33.41555556	33.14888889	33.42111111	33.32	33.40222222	33.44888889	33.67666667	33.43222222	33.61222222	33.44333333	33.27111111	33.55666667	33.19555556	33.21777778	33.05666667	32.98555556	33.20777778	33.22666667	32.73333333	32.83222222	32.50777778	32.40444444	32.25333333	32.35555556	32.04555556	32.10888889	31.88	31.87777778	31.61777778	31.44	31.09888889	30.68111111	30.16111111	29.88555556	29.95555556	30.63444444	29.97888889	30.50666667	30.10666667	30.32444444	30.53	30.76555556	30.66
8/11/19 11:36:15	-118.5147259	42.54370699	1234.455748	8/11/19 11:37:13	31.03111111	30.95444444	30.93444444	30.64444444	30.93888889	30.75666667	30.8	30.93555556	31.2	30.84	31.10777778	30.72888889	30.61333333	30.73777778	30.60666667	30.68	30.49555556	30.33888889	30.60222222	30.62555556	30.29222222	30.14666667	29.93222222	29.77888889	29.78555556	29.76222222	29.71444444	29.53777778	29.28111111	29.39666667	29.25888889	29.10666667	28.62666667	28.53	28.21888889	27.59888889	27.51555556	28.45555556	28.00666667	28.24111111	28.02	28.19777778	28.26	28.37666667	28.32222222
8/11/19 11:36:16	-118.5147622	42.54371876	1234.394265	8/11/19 11:37:14	26.41444444	26.28777778	26.18222222	25.96888889	26.13	26.04333333	25.96111111	26.16111111	26.34555556	26.01888889	26.23333333	25.79444444	25.69111111	25.89111111	25.75777778	25.64222222	25.64666667	25.32555556	25.74555556	25.51	25.35	25.28	25.11333333	25.00555556	24.95888889	25.09333333	24.93	24.86555556	24.67333333	24.61333333	24.51	24.34666667	24.02444444	23.99666667	23.95	23.12777778	23.18666667	23.99111111	23.50666667	23.93333333	23.36555556	23.71444444	23.71666667	23.87555556	23.95888889
8/11/19 11:36:17	-118.5148004	42.54373088	1234.346077	8/11/19 11:37:15	24.37	24.74888889	24.71777778	24.40555556	24.59666667	24.43666667	24.37222222	24.59888889	24.66555556	24.29111111	24.71222222	24.21888889	24.05777778	24.31111111	24.01111111	24.05333333	24.06555556	23.80333333	24.31888889	24.04333333	23.77111111	23.78	23.46777778	23.42888889	23.44111111	23.43	23.40444444	23.40222222	23.10333333	23.19777778	23.03444444	22.90666667	22.46	22.65	22.61	21.47111111	21.59555556	22.60111111	22.20555556	22.39111111	22.11	22.34444444	22.28111111	22.36333333	22.36888889
8/11/19 11:36:18	-118.5148386	42.54374232	1234.327597	8/11/19 11:37:16	21.41444444	21.54666667	21.56333333	21.16555556	21.59	21.28222222	21.24444444	21.39777778	21.68444444	21.27888889	21.43777778	21.16444444	20.95888889	21.20888889	20.93	20.88	20.90111111	20.77777778	21.15666667	21.03444444	20.64555556	20.55555556	20.40666667	20.46111111	20.27333333	20.36333333	20.30111111	20.18666667	20.08555556	20.08888889	19.76444444	19.77777778	19.54	19.41555556	19.20222222	18.75555556	18.53777778	19.53444444	18.92333333	19.47777778	18.76111111	19.18555556	19.17888889	19.38555556	19.37888889
8/11/19 11:36:19	-118.5148766	42.54375431	1234.38269	8/11/19 11:37:17	17.18333333	17.55333333	17.26666667	17.02777778	17.27222222	17.01222222	17.03555556	17.16	17.41777778	17.01888889	17.27555556	17.01333333	16.81222222	17.00111111	16.84333333	16.84333333	16.78888889	16.52111111	16.96333333	16.77555556	16.52333333	16.49777778	16.24	16.21555556	16.20222222	16.31777778	16.18111111	16.08333333	15.99777778	15.89666667	15.76777778	15.71555556	15.53666667	15.63	15.75555556	14.93666667	14.9	15.68777778	15.27111111	15.55	15.00444444	15.54888889	15.22	15.28777778	15.40888889
8/11/19 11:36:20	-118.5149156	42.5437665	1234.396494	8/11/19 11:37:18	18.08111111	17.88111111	18.1	17.60777778	18.02555556	17.67222222	17.71888889	17.88888889	18.08333333	17.64888889	17.95222222	17.49555556	17.41222222	17.63111111	17.42333333	17.42555556	17.37777778	17.21222222	17.54111111	17.38444444	17.05	17.08	16.89888889	16.70111111	16.70555556	16.91666667	16.73777778	16.76888889	16.59888889	16.56444444	16.35222222	16.18222222	15.87444444	15.88888889	15.99	15.37777778	15.34777778	16.37333333	15.55444444	16.00666667	15.38222222	15.86333333	15.79111111	15.85555556	15.93666667
8/11/19 11:36:21	-118.5149546	42.54377893	1234.360119	8/11/19 11:37:19	19.10444444	19.17444444	19.05222222	18.74111111	19.06111111	18.78333333	18.82222222	18.99444444	19.18222222	18.79666667	19.18777778	18.66666667	18.55111111	18.75666667	18.48666667	18.45	18.49111111	18.12777778	18.63	18.45333333	18.09222222	18.14222222	17.93222222	17.78666667	17.80111111	17.95777778	17.76444444	17.63666667	17.55	17.43555556	17.36111111	17.22666667	17.02333333	16.80777778	16.77333333	16.32222222	16.18	17.19333333	16.47777778	17.03888889	16.34333333	16.82222222	16.56666667	16.85	16.76555556
8/11/19 11:36:22	-118.5149924	42.54379114	1234.32909	8/11/19 11:37:20	21.02111111	21.24888889	21.05	20.59888889	21.03888889	20.88	20.86555556	21.04444444	21.19222222	20.84222222	20.98222222	20.67777778	20.49	20.69777778	20.53444444	20.51	20.39666667	20.18444444	20.56777778	20.43777778	20.10333333	19.91111111	19.87	19.65777778	19.61222222	19.90777778	19.69777778	19.53444444	19.44777778	19.44555556	19.34	19.28888889	18.91666667	18.81222222	18.45	18.21	17.87444444	18.86	18.03777778	18.76444444	18.07	18.64666667	18.48555556	18.54666667	18.59
8/11/19 11:36:23	-118.5150298	42.54380313	1234.318639	8/11/19 11:37:21	22.28111111	22.33333333	22.1	21.86222222	22.09111111	21.97666667	21.86555556	22.04555556	22.32666667	21.85666667	22.04111111	21.70444444	21.49222222	21.68777778	21.54	21.47666667	21.4	21.19666667	21.63111111	21.38666667	21.19333333	21.07444444	20.81666667	20.76888889	20.70888889	20.86444444	20.79444444	20.56666667	20.52666667	20.49888889	20.41	20.30222222	19.93777778	19.98111111	19.87444444	19.53444444	19.24	19.84555556	19.44888889	20.06444444	19.39444444	19.55666667	19.62	19.60333333	19.74444444
8/11/19 11:36:24	-118.5150687	42.54381547	1234.343897	8/11/19 11:37:22	19.47555556	19.51555556	19.41444444	19.01777778	19.28555556	18.94666667	19.10333333	19.20222222	19.57111111	19.06222222	19.30111111	18.88777778	18.82777778	19.00666667	18.78	18.78666667	18.75555556	18.51777778	18.97444444	18.79555556	18.48888889	18.43777778	18.34777778	18.16888889	18.11	18.30555556	18.24555556	18.03444444	17.98222222	17.91666667	17.76888889	17.70666667	17.32111111	17.46	17.14	16.89555556	16.53555556	17.73888889	17.05888889	17.36555556	16.72	17.19777778	17.17666667	17.31111111	17.29222222
8/11/19 11:36:25	-118.5151074	42.54382793	1234.369319	8/11/19 11:37:23	19.43555556	19.63444444	19.50666667	19.33888889	19.64111111	19.39888889	19.60333333	19.64222222	19.95666667	19.50777778	19.76111111	19.39222222	19.35111111	19.53	19.26111111	19.23	19.23888889	18.99555556	19.50333333	19.27777778	19.02222222	18.97888889	18.88444444	18.79111111	18.71888889	18.85666667	18.75444444	18.63111111	18.49222222	18.5	18.39333333	18.24888889	17.85555556	17.82222222	17.75888889	17.06	17.04	18.02666667	17.56111111	17.97444444	17.22111111	17.84333333	17.81666667	18.02111111	18.07777778
8/11/19 11:36:26	-118.5151463	42.5438405	1234.392487	8/11/19 11:37:24	17.71111111	18.10444444	17.67555556	17.73888889	18.00333333	17.73222222	17.61666667	18.01222222	18.09333333	17.77111111	18.01222222	17.75777778	17.59888889	17.79444444	17.58666667	17.52777778	17.53222222	17.2	17.83333333	17.62444444	17.35333333	17.37777778	17.06555556	17.02888889	17.07555556	17.16666667	17.15	16.95777778	16.87444444	16.80444444	16.59888889	16.58222222	16.15666667	16.07333333	15.97	15.62888889	15.24555556	16.60333333	15.72666667	16.27	15.76	16.17444444	16.09	16.39333333	16.36555556
8/11/19 11:36:27	-118.5151851	42.54385301	1234.421319	8/11/19 11:37:25	16.84444444	16.81222222	16.95222222	16.35444444	17.09111111	16.62222222	16.60666667	16.83333333	17.05	16.77777778	17.07666667	16.59444444	16.49444444	16.67222222	16.6	16.63	16.49	16.33666667	16.81777778	16.58888889	16.36666667	16.32	16.23555556	16.17555556	16.14333333	16.21	16.13444444	16.05	15.92888889	15.98444444	15.79222222	15.65777778	15.49333333	15.59222222	15.20777778	14.96777778	14.75666667	15.39666667	15.10666667	15.65	15.01222222	15.45666667	15.34	15.36333333	15.64111111
8/11/19 11:36:28	-118.5152239	42.54386565	1234.478173	8/11/19 11:37:26	16.97	17.15333333	17.04111111	16.87111111	17.17888889	16.94777778	16.94777778	17.12555556	17.44	17.13333333	17.40666667	16.96444444	17.03333333	17.22555556	16.93333333	16.89666667	16.99777778	16.68111111	17.31666667	17.00888889	16.81666667	16.71777778	16.59888889	16.57555556	16.61444444	16.65777778	16.66222222	16.43666667	16.42111111	16.34777778	16.21666667	16.11111111	15.67111111	15.77555556	15.62333333	14.88111111	15.09555556	15.88555556	15.53111111	15.96	15.28777778	15.67666667	15.68	15.79666667	15.83666667
8/11/19 11:36:29	-118.5152593	42.54387701	1234.449952	8/11/19 11:37:27	15.88777778	15.83888889	15.86888889	15.47222222	15.91444444	15.87	15.80444444	16.07555556	16.21333333	15.95222222	16.21555556	15.85222222	15.72333333	15.95	15.79777778	15.77888889	15.9	15.67666667	16.09888889	15.87444444	15.66666667	15.73	15.57888889	15.36444444	15.53888889	15.66	15.60888889	15.47222222	15.45777778	15.28	15.19111111	15.16888889	14.75111111	14.73222222	14.80111111	14.20777778	13.96444444	14.94333333	14.42555556	15.04	14.20222222	14.84555556	14.78888889	14.90666667	14.96
8/11/19 11:36:30	-118.515299	42.54388976	1234.408924	8/11/19 11:37:28	18.606	18.655	18.656	18.266	18.867	18.658	18.554	18.762	18.986	18.687	18.944	18.636	18.544	18.799	18.58	18.587	18.604	18.463	18.907	18.681	18.548	18.469	18.344	18.276	18.355	18.541	18.406	18.305	18.057	18.166	18.09	17.908	17.616	17.659	17.456	16.758	17.061	17.613	17.384	17.736	17.201	17.56	17.475	17.666	17.819
8/11/19 11:36:31	-118.5153407	42.54390325	1234.40991	8/11/19 11:37:29	21.13333333	21.05444444	21.04777778	20.90666667	21.16444444	21.04555556	20.93888889	21.22111111	21.46	21.17777778	21.47444444	21.13555556	20.98	21.21333333	20.94888889	20.96777778	21.01666667	20.77777778	21.24444444	20.99666667	20.86222222	20.75888889	20.61444444	20.66111111	20.65888889	20.77	20.70666667	20.58111111	20.40666667	20.47444444	20.43444444	20.18222222	19.70111111	19.80555556	19.41666667	18.89222222	18.92	20.16777778	19.40777778	19.84222222	19.43222222	19.71	19.90777778	20.06	20.12222222
8/11/19 11:36:32	-118.5153664	42.54391089	1234.4086	8/11/19 11:37:30	15.89555556	15.92666667	15.93777778	15.73222222	15.77222222	15.69111111	15.70666667	15.73777778	15.97444444	15.62444444	15.89111111	15.57888889	15.32777778	15.72333333	15.45777778	15.41	15.47555556	15.26333333	15.80444444	15.37777778	15.27666667	15.26888889	15.17555556	15.20444444	15.12555556	15.25555556	15.21777778	15.04111111	15.01888889	15.14555556	14.87555556	15.04	14.44777778	14.89888889	15.02444444	14.20888889	14.11222222	14.92222222	14.69222222	15.01222222	14.17	14.71555556	14.50444444	14.61777778	14.63777778
8/11/19 11:36:33	-118.5153756	42.543909	1234.41109	8/11/19 11:37:31	15.60777778	15.71222222	15.54888889	15.44777778	15.67333333	15.44666667	15.46222222	15.58333333	15.86777778	15.47333333	15.78777778	15.43555556	15.33111111	15.44777778	15.35555556	15.46666667	15.42777778	15.11888889	15.66111111	15.49666667	15.29666667	15.19444444	15.13111111	15.08555556	15.01111111	15.24222222	15.12111111	15.06333333	14.87777778	15.04555556	14.76888889	14.89777778	14.51888889	14.81666667	14.76888889	14.22555556	13.97444444	14.77111111	14.31	14.78888889	14.18555556	14.50888889	14.39777778	14.52222222	14.57555556
8/11/19 11:36:34	-118.5153847	42.54390011	1234.442006	8/11/19 11:37:32	15.65222222	15.71888889	15.50222222	15.52888889	15.79888889	15.55333333	15.60777778	15.52111111	15.83555556	15.53555556	15.84333333	15.50444444	15.24444444	15.62222222	15.39666667	15.34	15.41888889	15.10555556	15.64222222	15.53111111	15.34	15.24888889	15.11444444	15.06555556	15.11777778	15.22222222	15.14222222	15.08777778	15.03	15.01	15.03333333	14.94222222	14.61555556	14.69	14.81	14.05333333	14.08444444	14.75	14.34	15.03333333	14.01888889	14.57888889	14.46444444	14.55666667	14.68777778
8/11/19 11:36:35	-118.5153947	42.54388628	1234.480123	8/11/19 11:37:33	14.97111111	15.09333333	15.04555556	14.52222222	14.97444444	14.67666667	14.64444444	14.85666667	15.06	14.75	14.94333333	14.67666667	14.52555556	14.72777778	14.49444444	14.54333333	14.61222222	14.32333333	14.85444444	14.69777778	14.42666667	14.38777778	14.29	14.23666667	14.29555556	14.56555556	14.47222222	14.32444444	14.25666667	14.22444444	14.10888889	14.14666667	13.92555556	13.96222222	13.89555556	13.46888889	13.46666667	14.26111111	13.82111111	14.26444444	13.49111111	13.98111111	13.89555556	13.82444444	13.99555556
8/11/19 11:36:36	-118.5154058	42.54386858	1234.519394	8/11/19 11:37:34	12.89666667	13.27333333	13.18333333	12.77888889	13.12	12.90888889	12.75666667	13.01888889	13.17777778	12.77777778	13.18555556	12.77111111	12.62222222	12.89	12.71	12.64666667	12.65444444	12.48666667	12.99888889	12.73333333	12.59	12.59444444	12.46555556	12.41666667	12.41666667	12.51444444	12.52	12.36222222	12.22111111	12.49777778	12.29222222	12.32	12.05333333	12.14444444	12.18777778	12.04666667	11.45777778	12.39888889	12.2	12.55555556	11.71333333	12.09	11.88	11.99222222	12.18777778
8/11/19 11:36:37	-118.5154153	42.54385183	1234.51204	8/11/19 11:37:35	12.44222222	12.59111111	12.39222222	12.11777778	12.56888889	12.34	12.09	12.32111111	12.59333333	12.26	12.51888889	12.18	11.91444444	12.29888889	11.93333333	12.03666667	12.10777778	11.83333333	12.35666667	12.07222222	11.88333333	11.75444444	11.62777778	11.63222222	11.49777778	11.91777778	11.76111111	11.60555556	11.56333333	11.77777778	11.49222222	11.63555556	11.27444444	11.63444444	11.72111111	11.15888889	11.00111111	11.51777778	11.22111111	11.68	10.78333333	11.18555556	11.05111111	11.24444444	11.26888889
8/11/19 11:36:38	-118.5154151	42.54384611	1234.584216	8/11/19 11:37:36	11.75555556	11.70555556	11.64777778	11.22888889	11.66222222	11.49555556	11.33111111	11.68888889	11.72666667	11.35111111	11.69888889	11.31	11.14555556	11.44333333	11.17	11.13111111	11.20666667	10.88666667	11.50333333	11.16777778	11.04333333	10.93555556	10.85222222	10.79666667	10.73	10.95555556	10.92555556	10.77222222	10.81333333	10.88555556	10.54555556	10.69777778	10.38444444	10.89333333	10.73555556	10.44777778	10.08111111	10.66333333	10.38888889	10.89777778	10.04333333	10.36888889	10.23555556	10.40555556	10.45888889
8/11/19 11:36:39	-118.5154067	42.54384195	1234.597581	8/11/19 11:37:37	11.61555556	11.60888889	11.45333333	11.00888889	11.46666667	11.16333333	11.09777778	11.35777778	11.51444444	11.16444444	11.31111111	10.92888889	10.77888889	10.99444444	10.75777778	10.88777778	10.87555556	10.63555556	11.25111111	10.89111111	10.63666667	10.60333333	10.58666667	10.52666667	10.48777778	10.69777778	10.51222222	10.52444444	10.51888889	10.50777778	10.45333333	10.47111111	10.12222222	10.62777778	10.55	10.01111111	9.894444444	10.61555556	10.37666667	10.75333333	9.848888889	10.21777778	10.07555556	10.13333333	10.05222222
8/11/19 11:36:40	-118.5153901	42.54383606	1234.548265	8/11/19 11:37:38	11.25222222	11.17666667	11.12444444	10.99666667	11.18111111	10.97222222	10.84777778	11.05333333	11.23888889	10.90555556	11.24777778	10.73555556	10.70777778	10.88333333	10.66222222	10.68777778	10.70555556	10.53777778	11.03333333	10.68111111	10.6	10.49333333	10.33888889	10.38222222	10.39111111	10.63888889	10.47444444	10.34777778	10.29444444	10.26	10.19666667	10.38222222	10.06666667	10.44111111	10.74444444	9.962222222	9.681111111	10.38888889	10.26555556	10.53555556	9.8	10.19	9.848888889	10.09333333	10.06444444
8/11/19 11:36:41	-118.5153671	42.5438283	1234.476681	8/11/19 11:37:39	10.51111111	10.62	10.59333333	10.31666667	10.59888889	10.43888889	10.26888889	10.5	10.75222222	10.38	10.62111111	10.19222222	10.03	10.41	10.05333333	10.20333333	10.20222222	9.946666667	10.53	10.21	9.993333333	10.04777778	9.884444444	9.867777778	9.836666667	10.00333333	9.94	9.781111111	9.818888889	9.872222222	9.667777778	9.755555556	9.474444444	9.853333333	9.921111111	9.563333333	9.184444444	10.07888889	9.465555556	9.85	9.212222222	9.5	9.506666667	9.684444444	9.606666667
8/11/19 11:36:42	-118.5153402	42.5438197	1234.42668	8/11/19 11:37:40	10.99222222	11.16222222	11.11111111	10.88222222	11.23333333	10.91444444	10.81666667	11.07444444	11.25888889	10.92555556	11.18	10.75555556	10.64222222	10.95444444	10.69444444	10.70444444	10.68333333	10.46666667	10.97111111	10.78444444	10.55666667	10.48	10.40777778	10.28222222	10.28333333	10.55111111	10.55888889	10.32888889	10.34	10.37222222	10.19888889	10.23111111	9.876666667	10.42666667	10.55111111	9.728888889	9.577777778	10.19555556	9.982222222	10.41222222	9.51	9.943333333	9.711111111	10.05444444	10.13777778
8/11/19 11:36:43	-118.5153105	42.54381039	1234.4157	8/11/19 11:37:41	10.60888889	10.80777778	10.92777778	10.54222222	10.86666667	10.62	10.58888889	10.71222222	10.99444444	10.59333333	10.87222222	10.47333333	10.32444444	10.61333333	10.36222222	10.38	10.37222222	10.05555556	10.69777778	10.33555556	10.15666667	10.10222222	10.01777778	9.971111111	10.00555556	10.18222222	10.02666667	9.99	9.876666667	10.16888889	9.858888889	9.875555556	9.733333333	10.07888889	9.892222222	9.465555556	9.231111111	10.21555556	9.698888889	9.986666667	9.184444444	9.603333333	9.577777778	9.658888889	9.768888889
8/11/19 11:36:44	-118.5152779	42.5437999	1234.420335	8/11/19 11:37:42	10.81555556	11.14222222	10.82444444	10.71888889	10.95222222	10.90555556	10.71666667	10.77888889	11.13777778	10.67888889	10.94444444	10.54777778	10.43555556	10.62	10.41666667	10.56222222	10.57333333	10.14777778	10.77222222	10.53888889	10.3	10.22111111	10.13	10.15	10.11333333	10.24	10.15444444	10.12222222	10.08777778	10.09444444	9.943333333	10.09777778	9.696666667	9.991111111	10.48	9.65	9.166666667	10.00333333	9.645555556	10.04666667	9.372222222	9.792222222	9.644444444	9.771111111	9.931111111
8/11/19 11:36:45	-118.5152437	42.54378911	1234.441281	8/11/19 11:37:43	11.39777778	11.46777778	11.27555556	11.01	11.37222222	11.10555556	11.00888889	11.23888889	11.48777778	11.17888889	11.46888889	10.90777778	10.80666667	11.15111111	10.94111111	10.98	10.86	10.72111111	11.17666667	10.88	10.63333333	10.60666667	10.57444444	10.43444444	10.55111111	10.61888889	10.46666667	10.46777778	10.40111111	10.41888889	10.33444444	10.34222222	10.05111111	10.53666667	10.43	9.913333333	9.576666667	10.49111111	9.957777778	10.55777778	9.53	9.891111111	9.973333333	10.16666667	10.17222222
8/11/19 11:36:46	-118.5152091	42.54377815	1234.43596	8/11/19 11:37:44	11.65111111	11.6	11.75888889	11.28	11.65666667	11.36777778	11.29777778	11.42888889	11.85222222	11.25777778	11.61111111	11.24888889	11.14888889	11.34222222	11.01666667	11.10666667	11.20222222	10.85888889	11.49222222	11.24666667	10.92333333	10.8	10.81777778	10.74	10.63666667	10.89888889	10.82888889	10.77888889	10.71555556	10.58777778	10.44555556	10.58222222	10.25666667	10.68222222	10.72444444	9.962222222	9.755555556	10.47111111	10.18888889	10.70777778	9.742222222	10.12	10.05777778	10.25888889	10.23444444
8/11/19 11:36:47	-118.5151747	42.54376706	1234.433971	8/11/19 11:37:45	10.92555556	11.37222222	11.16555556	10.89	11.11666667	10.99888889	10.81666667	11.04555556	11.38666667	11.02222222	11.17777778	10.81777778	10.64111111	10.98666667	10.70666667	10.63666667	10.79111111	10.42444444	11.08	10.78888889	10.51	10.40666667	10.34111111	10.33777778	10.33111111	10.56555556	10.36444444	10.25888889	10.24444444	10.32333333	10.12666667	10.16888889	9.8	10.17555556	10.18555556	9.728888889	9.437777778	10.18111111	9.951111111	10.19888889	9.295555556	9.798888889	9.755555556	9.883333333	9.978888889
8/11/19 11:36:48	-118.5151405	42.54375605	1234.444529	8/11/19 11:37:46	11.06777778	11.31111111	11.05666667	10.82777778	11.19888889	10.95888889	10.81333333	11.15666667	11.30888889	11.04666667	11.21111111	10.79777778	10.67111111	10.95888889	10.71444444	10.74333333	10.68888889	10.45444444	11.04222222	10.79666667	10.50333333	10.52	10.40777778	10.35111111	10.31333333	10.45555556	10.42777778	10.27777778	10.23	10.31666667	10.23777778	10.14222222	9.914444444	10.18333333	10.28888889	9.534444444	9.401111111	10.07	9.784444444	10.10111111	9.207777778	9.926666667	9.706666667	9.987777778	9.926666667
8/11/19 11:36:49	-118.5151073	42.54374537	1234.469816	8/11/19 11:37:47	11.26666667	11.56444444	11.35777778	11.19111111	11.43333333	11.19555556	11.13666667	11.35444444	11.62333333	11.23222222	11.46888889	11.21333333	10.97666667	11.30111111	10.99	11.05666667	11.03555556	10.77555556	11.32333333	10.97111111	10.92	10.74666667	10.6	10.55777778	10.55666667	10.66444444	10.75	10.50444444	10.45111111	10.54444444	10.36777778	10.33777778	10.15666667	10.15888889	10.04222222	9.618888889	9.522222222	10.31333333	9.958888889	10.44333333	9.677777778	9.988888889	9.884444444	10.10444444	10.11777778
8/11/19 11:36:50	-118.5150751	42.54373531	1234.47952	8/11/19 11:37:48	13.33444444	13.40111111	13.47666667	13.19444444	13.40222222	13.16	12.95222222	13.15333333	13.54444444	13.11111111	13.36777778	12.87555556	12.75666667	13.01333333	12.78333333	12.88333333	12.87777778	12.52333333	13.20111111	12.76111111	12.64222222	12.35888889	12.36222222	12.36666667	12.32	12.41777778	12.28222222	12.21666667	12.08444444	12.24	11.99	12.11111111	11.71111111	12.08666667	12.40111111	11.58666667	11.12	11.97777778	11.61222222	12.36444444	11.21333333	11.65444444	11.49	11.63	11.52444444
8/11/19 11:36:51	-118.5150444	42.54372559	1234.477042	8/11/19 11:37:49	15.72	15.82333333	15.72	15.27666667	15.82111111	15.46333333	15.41777778	15.62888889	15.81111111	15.48666667	15.66444444	15.29222222	14.96111111	15.42	14.99888889	15.08333333	15.14666667	14.82111111	15.30666667	15.03333333	14.81	14.70444444	14.57222222	14.50777778	14.48111111	14.70333333	14.60666667	14.32888889	14.39888889	14.40555556	14.25333333	14.14666667	13.82888889	14.25444444	14.18222222	13.28333333	13.53333333	14.21888889	13.89222222	14.19888889	13.13333333	13.82	13.68111111	13.88777778	13.60888889
8/11/19 11:36:52	-118.5150139	42.54371587	1234.472142	8/11/19 11:37:50	17.44666667	17.44333333	17.45777778	17.11555556	17.38111111	17.03444444	17.05666667	17.22888889	17.52555556	17.07222222	17.4	16.88	16.73444444	16.93777778	16.73333333	16.76666667	16.79444444	16.42555556	16.98666667	16.57111111	16.50333333	16.35333333	16.21	16.27	16.18444444	16.38444444	16.14111111	15.98222222	15.89555556	16.00333333	15.79222222	15.97333333	15.44444444	15.90555556	15.67444444	15.2	15.18	15.76777778	15.35	16.02777778	14.87888889	15.30222222	15.20222222	15.40444444	15.28111111
8/11/19 11:36:53	-118.5149845	42.54370647	1234.463474	8/11/19 11:37:51	18.00888889	18.20222222	18.09777778	17.83888889	17.96111111	17.71666667	17.68333333	17.83888889	18.13222222	17.62444444	17.93111111	17.53	17.23444444	17.54777778	17.28333333	17.26666667	17.36444444	16.91888889	17.53666667	17.19444444	17.01	16.93222222	16.81888889	16.76777778	16.69222222	16.82777778	16.63222222	16.58888889	16.43777778	16.44444444	16.37333333	16.31111111	16.00222222	16.39555556	16.33666667	15.86333333	15.70333333	16.1	15.90666667	16.13444444	15.19888889	15.77555556	15.71333333	15.82555556	15.71666667
8/11/19 11:36:54	-118.5149561	42.54369746	1234.472355	8/11/19 11:37:52	16.20888889	16.54444444	16.35333333	15.70555556	16.33888889	15.88444444	15.89666667	15.98555556	16.34222222	15.82777778	16.16111111	15.75555556	15.49222222	15.74555556	15.49222222	15.54	15.55444444	15.17444444	15.75777778	15.39	15.25333333	15.16555556	14.96	14.96777778	14.88777778	15.00666667	14.90444444	14.83888889	14.72	14.80222222	14.63333333	14.64	14.36666667	14.82555556	14.86111111	14.24777778	13.99222222	14.42444444	14.20444444	14.63666667	13.87444444	14.17444444	13.88666667	14.15555556	14.03777778
8/11/19 11:36:55	-118.5149284	42.5436885	1234.48254	8/11/19 11:37:53	17	17.30222222	16.97444444	16.70666667	16.96777778	16.75	16.73111111	16.73444444	17.09666667	16.73777778	16.98	16.5	16.25	16.55111111	16.22111111	16.26333333	16.31555556	16.03222222	16.52666667	16.19333333	15.97	15.91666667	15.74888889	15.65111111	15.67444444	15.84222222	15.60777778	15.55	15.56888889	15.51777778	15.37333333	15.4	15.07	15.59777778	15.55333333	14.69444444	14.67444444	15.21111111	15.02111111	15.58555556	14.47111111	14.88444444	14.59777778	14.98555556	14.90222222
8/11/19 11:36:56	-118.5149008	42.54367944	1234.472526	8/11/19 11:37:54	20.18555556	20.26777778	20.04888889	19.79333333	20.02666667	19.82555556	19.71	19.86555556	20.05	19.61111111	20.04111111	19.44888889	19.16777778	19.59111111	19.21555556	19.22555556	19.24	18.96	19.57333333	19.11666667	18.86555556	18.72888889	18.52777778	18.57	18.56888889	18.58555556	18.63888889	18.30555556	18.23888889	18.30444444	18.22333333	18.23555556	17.90333333	18.17111111	18.11666667	17.71222222	17.55444444	18.07444444	17.77888889	18.23111111	17.37888889	17.67666667	17.38444444	17.50888889	17.61666667
8/11/19 11:36:57	-118.5148728	42.54367033	1234.413897	8/11/19 11:37:55	23.67333333	23.97777778	23.46333333	23.30444444	23.50555556	23.36666667	23.20666667	23.22	23.63555556	23.22888889	23.42555556	22.93777778	22.81222222	23.11555556	22.72222222	22.72333333	22.65111111	22.35777778	22.77888889	22.37444444	22.27444444	22.13444444	22.10222222	21.96444444	21.78111111	22.00888889	21.83555556	21.65666667	21.68555556	21.73777778	21.54777778	21.59111111	21.20666667	21.55222222	21.29777778	20.61444444	20.57444444	21.34555556	20.86666667	21.07555556	20.33333333	20.77222222	20.56666667	20.82444444	20.72222222
8/11/19 11:36:58	-118.5148451	42.5436615	1234.36239	8/11/19 11:37:56	27.87444444	27.81	27.67555556	27.41	27.62444444	27.48222222	27.27666667	27.38444444	27.72555556	27.21555556	27.52444444	27.03111111	26.76444444	27.07777778	26.68333333	26.8	26.76111111	26.44555556	26.97	26.56777778	26.44	26.18555556	25.97555556	25.95444444	25.86222222	25.92222222	25.85888889	25.66888889	25.52666667	25.72	25.51	25.38222222	24.96666667	25.22888889	24.88555556	24.46333333	24.32777778	25.00444444	24.69888889	25.11777778	24.15222222	24.51777778	24.42222222	24.63111111	24.55777778
8/11/19 11:36:59	-118.5148184	42.54365296	1234.359245	8/11/19 11:37:57	30.11888889	30.27111111	30.14333333	29.54444444	29.89555556	29.52777778	29.60333333	29.76	30.00111111	29.51555556	29.86	29.41666667	29.15	29.50444444	29.09777778	29.18	29.18555556	28.86111111	29.32	29.04	28.86666667	28.75	28.50666667	28.46666667	28.26666667	28.47555556	28.33555556	28.12777778	27.95666667	28.06666667	27.94666667	27.83111111	27.51333333	27.47555556	27.39666667	26.73111111	26.56333333	27.29777778	27.05666667	27.09222222	26.33555556	26.72777778	26.67333333	26.87666667	26.73222222
8/11/19 11:37:00	-118.5147926	42.54364467	1234.397	8/11/19 11:37:58	33.96222222	34.04666667	33.79666667	33.42222222	33.60555556	33.39111111	33.12777778	33.20111111	33.65444444	33.18111111	33.44444444	33.16444444	32.89666667	33.23888889	32.92111111	32.92333333	32.99555556	32.64555556	33.17888889	32.75444444	32.64777778	32.41555556	32.31222222	32.03555556	32.01111111	32.07666667	31.96555556	31.73888889	31.52222222	31.75777778	31.67888889	31.49777778	31.06555556	31.27111111	30.90333333	30.29666667	30.12444444	30.79222222	30.28444444	30.63666667	29.78888889	30.04333333	29.93222222	30.19222222	30.06111111
8/11/19 11:37:01	-118.5147679	42.54363684	1234.426087	8/11/19 11:37:59	36.20666667	36.24	36.20333333	35.89444444	35.92555556	35.82	35.74777778	35.64777778	36.17	35.72333333	36.04777778	35.68	35.49	35.67	35.42	35.45	35.53666667	35.15666667	35.54	35.25	35.15666667	34.91666667	34.77777778	34.63111111	34.54222222	34.49111111	34.30333333	34.38	33.96444444	34.07222222	33.91	33.76	33.43888889	33.34	33.16	32.60444444	32.49	33.17555556	32.68222222	32.80111111	32.10888889	32.34777778	32.39666667	32.61555556	32.39333333
8/11/19 11:37:02	-118.5147435	42.54362913	1234.446416	8/11/19 11:38:00	36.49555556	36.47555556	36.30555556	36.01444444	36.09888889	35.81222222	35.91333333	35.81444444	36.21444444	35.88888889	36.22111111	35.72666667	35.59333333	35.73777778	35.44333333	35.56	35.50111111	35.2	35.59666667	35.22555556	35.14333333	34.91666667	34.73888889	34.62	34.48222222	34.65444444	34.39777778	34.43555556	34.05444444	34.13777778	34.10666667	33.87111111	33.55555556	33.82444444	33.27111111	32.62333333	32.53888889	33.38	32.91666667	33.22666667	32.28222222	32.71555556	32.65888889	32.82444444	32.74666667
8/11/19 11:37:03	-118.51472	42.54362165	1234.467484	8/11/19 11:38:01	34.841	34.896	34.687	34.374	34.658	34.389	34.373	34.389	34.771	34.462	34.762	34.355	34.208	34.485	34.069	34.099	34.12	33.789	34.248	33.869	33.702	33.632	33.282	33.272	33.154	33.259	33.091	32.919	32.579	32.735	32.728	32.54	32.081	32.196	31.857	31.273	31.34	32.045	31.636	31.983	31.132	31.5	31.54	31.669	31.477
8/11/19 11:37:04	-118.5146975	42.54361431	1234.468332	8/11/19 11:38:02	32.32666667	32.36777778	32.09777778	31.76555556	32.05222222	31.80555556	31.64222222	31.66444444	32.07444444	31.66333333	31.85555556	31.56777778	31.25555556	31.4	31.17777778	31.29	31.24666667	31.05333333	31.40888889	31.08333333	30.96	30.74333333	30.55333333	30.54777778	30.39222222	30.51	30.36333333	30.22555556	30.06	30.21444444	30.10888889	29.99111111	29.73111111	29.80333333	29.79555556	28.87333333	28.86444444	29.51555556	29.13333333	29.58777778	28.70444444	29.04777778	29.12	29.29555556	29.07666667
8/11/19 11:37:05	-118.5146759	42.5436072	1234.4381	8/11/19 11:38:03	32.83	32.96777778	33.20444444	32.67	32.76555556	32.66333333	32.36444444	32.53	32.86111111	32.29	32.80111111	32.25111111	32.03444444	32.31888889	32.07333333	32.02666667	32.05555556	31.77333333	32.11222222	31.89333333	31.71666667	31.61555556	31.27111111	31.13333333	31.13111111	31.14	31.02222222	30.97777778	30.78333333	30.86	30.79222222	30.69333333	30.20777778	30.27888889	29.92666667	29.57555556	29.48888889	30.31555556	29.91	30.15555556	29.33777778	29.85	29.62555556	29.95111111	29.69555556
8/11/19 11:37:06	-118.5146546	42.54360016	1234.414316	8/11/19 11:38:04	36.94777778	36.97555556	36.87222222	36.48777778	36.67333333	36.35777778	36.31111111	36.34555556	36.98666667	36.51	36.73777778	36.45555556	36.07555556	36.37333333	35.99	36.12666667	36.07888889	35.73	36.2	35.84111111	35.73666667	35.54888889	35.27333333	35.31333333	35.18444444	35.29222222	35.00333333	34.82555556	34.62	34.65666667	34.56777778	34.45333333	33.96	34.09888889	33.49555556	32.94111111	33.16444444	33.72555556	33.29333333	33.64555556	32.93222222	33.38	33.37666667	33.46222222	33.26666667
8/11/19 11:37:07	-118.514633	42.54359309	1234.425694	8/11/19 11:38:05	37.72444444	37.93555556	37.59222222	37.35555556	37.44777778	37.40888889	37.27666667	37.53555556	37.91222222	37.34444444	37.70666667	37.36111111	37.02888889	37.23	37.00222222	37.09333333	36.99111111	36.66222222	37.07777778	36.80777778	36.61333333	36.54333333	36.24222222	36.21777778	36.15222222	36.16444444	36.07666667	35.84777778	35.53666667	35.63444444	35.48666667	35.27111111	34.82777778	34.82333333	34.05666667	33.49666667	33.71555556	34.51888889	33.88888889	34.51333333	33.74	34.07444444	34.04666667	34.16	34.06555556
8/11/19 11:37:08	-118.514611	42.54358578	1234.464437	8/11/19 11:38:06	37.22333333	37.37666667	37.10333333	36.90777778	37.17	36.79555556	36.81	36.92888889	37.55	36.96555556	37.26666667	36.77222222	36.56111111	36.92	36.50444444	36.65666667	36.56777778	36.26111111	36.69444444	36.25333333	36.22666667	35.98777778	35.83	35.70555556	35.76333333	35.65777778	35.48333333	35.33333333	35.08444444	35.02111111	34.95444444	34.73777778	34.42444444	34.25333333	33.94222222	33.09888889	33.50888889	34.03666667	33.63	33.81	33.04222222	33.59111111	33.62555556	33.89555556	33.60666667
8/11/19 11:37:09	-118.5145883	42.54357808	1234.46749	8/11/19 11:38:07	36.4	36.27125	36.25625	36.1325	36.0875	35.94	35.82125	35.98125	36.4525	36.05125	36.42375	35.83375	35.6375	35.975	35.6125	35.66125	35.6925	35.33625	35.72375	35.47	35.275	35.13	34.87875	34.8325	34.7175	34.7875	34.5825	34.3775	34.17	34.2875	34.15375	34.03	33.5975	33.575	32.9825	32.36125	32.585	33.0125	32.985	33.19125	32.265	32.65625	32.62	32.925	32.81125
8/11/19 11:37:10	-118.5145627	42.54356952	1234.431868	8/11/19 11:38:08	35.78444444	36.08333333	36.00666667	35.81222222	35.98444444	35.73222222	35.58555556	35.65777778	36.12444444	35.78777778	36.08333333	35.51444444	35.48222222	35.69888889	35.35	35.47	35.37777778	35.01555556	35.58444444	35.17333333	34.92666667	34.85111111	34.76888889	34.53333333	34.64777778	34.51333333	34.39111111	34.08444444	34.02777778	34.09222222	33.95222222	33.71555556	33.36	33.26111111	32.85555556	32.14555556	32.16444444	32.91444444	32.48111111	33.15111111	32.07777778	32.66888889	32.67222222	32.83666667	32.66444444
8/11/19 11:37:11	-118.5145318	42.54355934	1234.396632	8/11/19 11:38:09	35.94	35.845	35.712	35.473	35.663	35.359	35.267	35.273	35.815	35.488	35.828	35.432	35.141	35.422	35.026	35.071	35.172	34.758	35.243	34.805	34.732	34.662	34.437	34.266	34.165	34.249	34.17	33.899	33.783	33.76	33.636	33.592	33.03	33.038	32.716	32.156	32.28	32.822	32.405	32.723	32.001	32.333	32.386	32.564	32.482
8/11/19 11:37:12	-118.5144956	42.54354746	1234.400174	8/11/19 11:38:10	34.48222222	34.76777778	34.44555556	34.33444444	34.34888889	34.17	33.96222222	34.16	34.49888889	34.24111111	34.49666667	33.95777778	33.75555556	34.09222222	33.62888889	33.93444444	33.77888889	33.49666667	33.91888889	33.66333333	33.44444444	33.32666667	33.01555556	32.96555556	32.91	32.88555556	32.80111111	32.54222222	32.45222222	32.47444444	32.47666667	32.24888889	31.68	31.75444444	31.23888889	30.78333333	30.65777778	31.46777778	31.24888889	31.48777778	30.75111111	31.24444444	31.12555556	31.35444444	31.23555556
8/11/19 11:37:13	-118.5144532	42.54353363	1234.430168	8/11/19 11:38:11	26.25111111	26.43555556	26.25	25.96333333	26.32111111	26.06777778	25.89888889	25.91222222	26.26888889	25.92222222	26.20555556	25.79222222	25.47777778	25.79	25.48888889	25.65888889	25.55222222	25.28	25.75666667	25.34555556	25.29333333	25.13333333	24.92333333	24.97222222	24.87444444	24.88	24.84777778	24.69777778	24.62	24.74555556	24.68777778	24.62222222	24.28888889	24.47222222	23.96111111	23.36111111	23.31666667	24.02	23.67111111	24.39555556	23.34666667	23.66	23.71111111	23.76222222	23.78888889
8/11/19 11:37:14	-118.5144104	42.54351974	1234.46596	8/11/19 11:38:12	23.95555556	24.12444444	24.11111111	23.80888889	24.17111111	23.78333333	23.64555556	23.75555556	24.13444444	23.71111111	24.01555556	23.54444444	23.42111111	23.63666667	23.38555556	23.54	23.56222222	23.10222222	23.57333333	23.25777778	23.14	23.02444444	22.88222222	22.84444444	22.76333333	22.89555556	22.85555556	22.55111111	22.43888889	22.73	22.54444444	22.50666667	21.87222222	22.05333333	22.04888889	21.06444444	21.26888889	22.10333333	21.79222222	22.2	21.30555556	21.75333333	21.57888889	21.85888889	21.72666667
8/11/19 11:37:15	-118.5143678	42.54350601	1234.470729	8/11/19 11:38:13	20.70888889	20.79666667	20.79777778	20.56222222	20.87444444	20.62222222	20.36	20.53777778	20.91666667	20.55111111	20.75333333	20.24555556	20.07777778	20.42444444	20.11444444	20.20333333	20.30666667	19.86777778	20.53777778	20.05444444	19.95666667	19.81777778	19.77555556	19.68666667	19.78333333	19.68444444	19.81666667	19.51777778	19.46666667	19.55888889	19.49777778	19.37333333	18.88444444	19.24777778	18.78555556	18.23	18.34888889	18.97777778	18.66444444	19.26555556	18.25111111	18.69333333	18.75444444	18.96222222	18.83333333
8/11/19 11:37:16	-118.5143247	42.54349208	1234.454977	8/11/19 11:38:14	19.26777778	19.58222222	19.63111111	19.11666667	19.40555556	19.18777778	19.02444444	19.24222222	19.66444444	19.06777778	19.53333333	18.88777778	18.83111111	19.10333333	18.77	18.86666667	18.93666667	18.50222222	19.15555556	18.66888889	18.63111111	18.57888889	18.41444444	18.33	18.30333333	18.49	18.53222222	18.20222222	18.17888889	18.25888889	18.09555556	18.16888889	17.75111111	18	17.67777778	17.13	17.08888889	17.88222222	17.62222222	18.09555556	16.96444444	17.35777778	17.52777778	17.68	17.52555556
8/11/19 11:37:17	-118.5142814	42.54347818	1234.417119	8/11/19 11:38:15	20.77111111	20.89	20.91333333	20.51555556	21.01222222	20.96111111	20.46666667	20.72222222	21.15111111	20.64888889	21.03555556	20.48222222	20.33222222	20.70222222	20.30666667	20.44	20.47555556	20.10888889	20.74777778	20.28	20.19666667	20.01888889	19.98555556	19.93888889	19.83888889	20.11555556	20.06333333	19.82555556	19.74555556	19.96777778	19.74222222	19.72444444	19.18444444	19.42666667	19.12222222	18.84333333	18.32222222	19.58222222	18.80444444	19.40222222	18.62333333	19.08444444	19.08888889	19.36888889	19.21888889
8/11/19 11:37:18	-118.5142389	42.54346463	1234.35684	8/11/19 11:38:16	22.34111111	22.75777778	22.65111111	22.24888889	22.64111111	22.40111111	22.15888889	22.47	22.88888889	22.50555556	22.78777778	22.34222222	22.10444444	22.42	22.23	22.31666667	22.28555556	22.01555556	22.56111111	22.19777778	22.12333333	22.01888889	21.89444444	21.84111111	21.88666667	22.00777778	21.91555556	21.65888889	21.58555556	21.81111111	21.68444444	21.69777778	21.17888889	21.12666667	20.64555556	20.18666667	20.32222222	21.31333333	20.96111111	21.43444444	20.59555556	21.24888889	21.21555556	21.50333333	21.39333333
8/11/19 11:37:19	-118.5141971	42.54345122	1234.333968	8/11/19 11:38:17	24.14111111	24.41555556	24.37	24.25555556	24.55222222	24.32	24.02333333	24.31444444	24.71555556	24.27888889	24.63	24.09666667	23.93777778	24.18222222	23.90666667	24.09	24.16444444	23.72222222	24.28333333	23.86222222	23.89444444	23.66555556	23.53	23.61111111	23.52111111	23.63777778	23.56	23.47888889	23.35777778	23.49	23.3	23.27111111	22.79333333	22.61666667	22.27333333	21.88222222	21.81111111	22.97888889	22.48888889	23.09666667	22.15888889	22.80666667	22.76555556	23.02222222	23.06888889
8/11/19 11:37:20	-118.5141546	42.54343744	1234.348719	8/11/19 11:38:18	29.56444444	29.81111111	29.88444444	29.58666667	29.80333333	29.56666667	29.39666667	29.58111111	30.03	29.53555556	29.93222222	29.42888889	29.28222222	29.50666667	29.18444444	29.39333333	29.43111111	29.08222222	29.60888889	29.32777778	29.13	29.05888889	28.87333333	28.80222222	28.87333333	28.92777778	28.94555556	28.78666667	28.60888889	28.78333333	28.77666667	28.52444444	28.19	28.02333333	27.37666667	27.00333333	26.84333333	28.01444444	27.70777778	28.13444444	27.63111111	28.18888889	28.21111111	28.56444444	28.49111111
8/11/19 11:37:21	-118.5141139	42.5434243	1234.35281	8/11/19 11:38:19	21.27444444	21.52333333	21.42333333	21.24	21.58333333	21.32444444	21.16	21.33333333	21.64888889	21.28333333	21.75222222	21.18777778	20.87777778	21.30555556	21.07444444	21.10333333	21.12555556	20.80444444	21.47	21.02888889	20.97444444	20.79222222	20.63666667	20.73888889	20.64666667	20.81222222	20.75666667	20.62888889	20.47	20.66666667	20.68222222	20.51111111	20.07666667	20.30444444	19.79222222	19.38666667	18.99666667	19.96222222	19.91222222	20.36111111	19.47888889	19.97777778	20.05333333	20.29444444	20.20222222
8/11/19 11:37:22	-118.5140747	42.54341152	1234.34141	8/11/19 11:38:20	25.43	25.73666667	25.65777778	25.35888889	25.81111111	25.55333333	25.41666667	25.57777778	25.95222222	25.55111111	25.89222222	25.42222222	25.24222222	25.62777778	25.24444444	25.42444444	25.51222222	25.10777778	25.72444444	25.27333333	25.24222222	25.07777778	24.93555556	24.93555556	24.94777778	25.07222222	25.04555556	24.79444444	24.71444444	24.89666667	24.79555556	24.62666667	24.18666667	23.99666667	23.63555556	22.77555556	23.06333333	24.26666667	23.73333333	24.07888889	23.42111111	24.18666667	24.13666667	24.54888889	24.42777778
8/11/19 11:37:23	-118.5140371	42.54339935	1234.34068	8/11/19 11:38:21	27.88888889	28.34555556	28.16	27.90888889	28.05111111	27.96888889	27.91222222	27.89888889	28.38111111	27.85	28.26111111	27.79	27.57444444	28.10333333	27.63666667	27.86333333	27.77888889	27.50111111	28.06222222	27.60555556	27.63333333	27.49111111	27.37666667	27.34111111	27.47	27.44888889	27.42111111	27.20111111	27.18333333	27.35666667	27.18	27.13777778	26.54111111	26.48555556	25.87	25.45555556	25.35444444	26.51333333	25.93	26.64333333	25.97888889	26.53111111	26.74777778	27.11888889	26.92666667
8/11/19 11:37:24	-118.5140009	42.54338761	1234.357961	8/11/19 11:38:22	26.75555556	26.88111111	26.93222222	26.65444444	26.87777778	26.86555556	26.68555556	26.85777778	27.40444444	26.91888889	27.20777778	26.77333333	26.49	27.03	26.61	26.68111111	26.83555556	26.47666667	27.02666667	26.64777778	26.52666667	26.41888889	26.28555556	26.35777778	26.30222222	26.42222222	26.33555556	26.17666667	26.08888889	26.22777778	26.19444444	26.10666667	25.54444444	25.24444444	24.93888889	24.33555556	24.33666667	25.27222222	24.92555556	25.71	24.88555556	25.49666667	25.68111111	26.05111111	25.90555556
8/11/19 11:37:25	-118.5139638	42.54337539	1234.380287	8/11/19 11:38:23	24.16222222	24.63	24.45666667	24.33666667	24.50333333	24.32111111	24.03333333	24.17222222	24.73666667	24.23333333	24.58222222	24.16111111	23.89444444	24.32444444	23.98666667	24.11888889	24.16777778	23.73333333	24.43333333	23.99333333	24.01777778	23.81888889	23.75333333	23.76777778	23.76555556	23.86	23.86555556	23.62555556	23.62777778	23.84888889	23.58	23.54666667	23.08111111	22.85111111	22.43555556	21.96777778	21.82	23.00666667	22.79666667	23.07333333	22.43111111	23.05444444	23.13222222	23.44222222	23.34444444
8/11/19 11:37:26	-118.5139257	42.54336328	1234.401397	8/11/19 11:38:24	31.05333333	31.38666667	31.40444444	31.08666667	31.37333333	31.19444444	30.84	31.16555556	31.69333333	31.14	31.47777778	31.07222222	30.90222222	31.28777778	30.95111111	30.93333333	31.06222222	30.80666667	31.2	30.90888889	30.81222222	30.68888889	30.48666667	30.42666667	30.38222222	30.51777778	30.37222222	30.21	30.17444444	30.26555556	30.20777778	30.10222222	29.42888889	29.32777778	28.66777778	28.48333333	28.2	29.40555556	28.91444444	29.57222222	28.95	29.53888889	29.68666667	30.01777778	29.89111111
8/11/19 11:37:27	-118.5138891	42.54335167	1234.4119	8/11/19 11:38:25	30.42222222	30.59	30.47777778	30.44888889	30.52333333	30.43444444	30.28666667	30.55777778	30.90111111	30.41111111	30.87222222	30.43111111	30.24888889	30.60111111	30.21	30.45	30.45888889	30.15777778	30.66111111	30.30777778	30.18777778	29.95111111	29.97777778	29.71777778	29.82	29.87222222	29.80444444	29.71444444	29.53	29.85	29.64444444	29.50222222	28.89111111	28.83	28.06777778	27.64666667	27.73333333	28.76	28.41222222	29.03222222	28.27777778	28.91555556	29.07222222	29.47111111	29.41444444
8/11/19 11:37:28	-118.5138545	42.54334037	1234.4319	8/11/19 11:38:26	27.48111111	27.95333333	27.86555556	27.45444444	27.78777778	27.59	27.44777778	27.50444444	28.02555556	27.54888889	27.93444444	27.45777778	27.35444444	27.72555556	27.36333333	27.55333333	27.57555556	27.12444444	27.77666667	27.45	27.32333333	27.19555556	27.15333333	27.12666667	27.13666667	27.20444444	27.11555556	26.96222222	26.81333333	27.03666667	26.90666667	26.89777778	26.37111111	26.32222222	25.75	25.18222222	24.95444444	26.02444444	25.94444444	26.36444444	25.72111111	26.27444444	26.47333333	26.79444444	26.71111111
8/11/19 11:37:29	-118.5138234	42.54333009	1234.449765	8/11/19 11:38:27	26.74	26.63	26.86333333	26.57222222	26.99111111	26.61	26.37	26.48555556	27.1	26.59555556	27.05888889	26.43555556	26.37666667	26.87	26.42666667	26.53111111	26.70444444	26.26555556	26.86555556	26.48666667	26.46	26.3	26.08555556	26.12555556	26.10222222	26.23777778	26.29	25.98	25.90333333	26.07111111	25.94777778	25.83111111	25.34666667	25.36444444	24.45888889	24.03444444	23.76444444	25.06777778	24.70555556	25.50444444	24.62222222	25.27444444	25.44666667	25.88444444	25.74444444
8/11/19 11:37:30	-118.5138115	42.54332642	1234.475323	8/11/19 11:38:28	25.14666667	25.37222222	25.45333333	25.12444444	25.44777778	25.21888889	24.92222222	25.11888889	25.53	25.17	25.51	25.08111111	24.94666667	25.27111111	24.98888889	25.16666667	25.22333333	24.89666667	25.47444444	25.08666667	24.99333333	24.84777778	24.78444444	24.68777778	24.74333333	24.85111111	24.78555556	24.52333333	24.57666667	24.54888889	24.63777778	24.46666667	23.87	23.81	23.41333333	23.13888889	22.71	24.09555556	23.43	24.23666667	23.27777778	24.01555556	23.94444444	24.38111111	24.29222222
8/11/19 11:37:31	-118.5138121	42.54332664	1234.467158	8/11/19 11:38:29	25.78444444	26.11555556	25.89666667	25.92555556	26.01444444	25.72555556	25.60222222	25.98	26.31777778	25.82666667	26.22666667	25.78666667	25.68666667	25.95444444	25.72333333	25.85666667	25.95888889	25.50333333	26.10888889	25.69111111	25.67	25.45333333	25.29111111	25.48333333	25.32777778	25.47666667	25.39444444	25.22222222	25.21666667	25.36	25.17111111	25.21333333	24.59777778	24.44777778	24.08111111	23.62444444	23.48333333	24.57888889	24.02333333	24.51666667	23.84333333	24.60777778	24.7	25.03333333	24.96222222
8/11/19 11:37:32	-118.5138142	42.54332729	1234.45946	8/11/19 11:38:30	25.10333333	25.39	25.22888889	25.09444444	25.49555556	25.16	25.01	25.19555556	25.80333333	25.26222222	25.65777778	25.18444444	24.82333333	25.39111111	25.04	25.12222222	25.26333333	24.88111111	25.51111111	25.10555556	25.00333333	24.91111111	24.68888889	24.67444444	24.72777778	24.83333333	24.76	24.61111111	24.51777778	24.83111111	24.61666667	24.44444444	23.87555556	24.10111111	23.45111111	22.79555556	22.54	23.75666667	23.47777778	23.95666667	23.16444444	23.90333333	23.79333333	24.20555556	24.15555556
8/11/19 11:37:33	-118.5138155	42.54332786	1234.500271	8/11/19 11:38:31	24.88111111	25.23222222	25.20666667	24.93666667	25.13111111	24.97333333	24.75555556	25.08444444	25.62111111	25.09444444	25.43333333	25	24.88111111	25.16333333	24.8	25.04888889	25.11333333	24.73222222	25.38555556	24.89333333	24.84	24.66777778	24.59777778	24.61	24.53555556	24.61666667	24.67333333	24.43	24.36777778	24.50777778	24.26777778	24.39555556	23.70777778	23.69666667	22.96333333	22.48444444	22.42777778	23.68888889	23.07555556	24.02222222	22.75	23.53666667	23.68555556	24.05111111	23.95111111
8/11/19 11:37:34	-118.5138163	42.54332803	1234.508035	8/11/19 11:38:32	24.83	25.21	25.24888889	24.95333333	25.20111111	24.92888889	24.75888889	25.02222222	25.53333333	25.08333333	25.52888889	24.99	24.74555556	25.26888889	24.83	25.01444444	25.09888889	24.72555556	25.25888889	24.88666667	24.8	24.69666667	24.64333333	24.55	24.48666667	24.60888889	24.57111111	24.31777778	24.4	24.41333333	24.31555556	24.25333333	23.65888889	23.63444444	22.98444444	22.43666667	22.40777778	23.59777778	23.24777778	23.78777778	22.96333333	23.69333333	23.70333333	23.90333333	23.87777778
8/11/19 11:37:35	-118.5138162	42.54332799	1234.48539	8/11/19 11:38:33	24.48888889	25.06777778	24.88	24.74	25.04333333	24.77777778	24.55555556	24.66888889	25.28444444	24.82222222	25.19	24.79222222	24.61333333	25.03222222	24.56333333	24.76777778	24.91333333	24.46	25.17	24.71222222	24.66666667	24.38	24.36666667	24.33555556	24.26111111	24.46888889	24.40666667	24.13888889	24.10555556	24.31222222	24.16222222	24.16	23.44222222	23.38333333	23.13777778	22.21333333	22.15555556	23.36	23.07666667	23.58222222	22.68555556	23.33	23.35888889	23.74	23.66555556
8/11/19 11:37:36	-118.5138161	42.54332804	1234.48799	8/11/19 11:38:34	24.52555556	24.80333333	24.73	24.53333333	24.89555556	24.78222222	24.33444444	24.55888889	25.16888889	24.76333333	25.15888889	24.68222222	24.52666667	24.88333333	24.55666667	24.80555556	24.81666667	24.48666667	25.09333333	24.58333333	24.67666667	24.52666667	24.24666667	24.25888889	24.31666667	24.41777778	24.39666667	24.18777778	24.06444444	24.42666667	24.17111111	24.12	23.34555556	23.65	22.88444444	22.3	22.1	23.57333333	22.94333333	23.62777778	22.64888889	23.32	23.51333333	23.9	23.64
8/11/19 11:37:37	-118.5138145	42.5433289	1234.518406	8/11/19 11:38:35	23.37777778	23.85666667	23.75666667	23.42	23.67444444	23.50222222	23.36222222	23.40888889	24.08111111	23.59555556	24.05333333	23.56888889	23.30777778	23.80111111	23.41	23.64666667	23.75	23.35222222	23.92888889	23.52555556	23.58666667	23.34555556	23.27111111	23.26777778	23.29	23.46777778	23.48777778	23.06555556	23.09	23.23888889	23.20222222	23.05333333	22.63	22.61111111	21.76444444	21.41444444	21.34333333	22.43444444	22.05666667	22.70888889	21.81888889	22.39444444	22.41888889	22.71	22.65222222
8/11/19 11:37:38	-118.5138067	42.54333215	1234.511558	8/11/19 11:38:36	22.96333333	23.53	23.41666667	22.99	23.47111111	23.27333333	22.91111111	23.16888889	23.72	23.35666667	23.71111111	23.15222222	23.04666667	23.53333333	23.20666667	23.24	23.48	22.94555556	23.79555556	23.24444444	23.37888889	23.15555556	22.96444444	23.06444444	22.97888889	23.08666667	23.05555556	22.94555556	22.91	23.10555556	22.96111111	22.84444444	22.21666667	22.26333333	21.73333333	21.41555556	20.97666667	22.17222222	21.73555556	22.51888889	21.65111111	22.24222222	22.35222222	22.67666667	22.57777778
8/11/19 11:37:39	-118.5137834	42.5433333	1234.306226	8/11/19 11:38:37	21.62888889	21.78333333	21.81222222	21.41777778	21.65	21.52333333	21.27333333	21.34888889	21.98	21.69777778	22.01444444	21.49888889	21.36333333	21.7	21.45333333	21.59666667	21.73777778	21.28666667	22.03333333	21.60888889	21.60666667	21.45	21.31555556	21.32666667	21.34333333	21.48222222	21.38333333	21.35777778	21.25	21.48222222	21.28777778	21.18222222	20.74	20.86777778	20.32111111	19.72	19.65222222	20.74777778	20.46777778	21.02888889	20.01888889	20.51555556	20.80555556	21.09111111	20.89888889
8/11/19 11:37:40	-118.5137465	42.54332983	1233.909497	8/11/19 11:38:38	20.53444444	20.86777778	20.81777778	20.60555556	20.85666667	20.82444444	20.32222222	20.54555556	21.23333333	20.79444444	21.09555556	20.73333333	20.43444444	20.88666667	20.61444444	20.74	20.87888889	20.51	21.25333333	20.78111111	20.53	20.57333333	20.40666667	20.51222222	20.40111111	20.63777778	20.71	20.41	20.23777778	20.57888889	20.46	20.37777778	19.81111111	19.78777778	19.35555556	19.45666667	18.69666667	19.91333333	19.40111111	20.09444444	19.03777778	19.75555556	19.78666667	20.11555556	20.12222222
8/11/19 11:37:41	-118.5137114	42.54332607	1233.530581	8/11/19 11:38:39	19.906	20.381	20.245	20.119	20.412	20.096	19.905	20.041	20.736	20.251	20.538	20.06	19.891	20.24	20.042	20.166	20.335	19.976	20.613	20.122	20.167	19.955	19.879	19.862	19.82	20.059	20.101	19.845	19.757	20.018	19.805	19.9	19.261	19.362	18.618	18.325	18.359	19.448	18.885	19.713	18.558	19.268	19.288	19.624	19.43
8/11/19 11:37:42	-118.5136824	42.54332521	1233.3522	8/11/19 11:38:40	19.93333333	20.36444444	20.40111111	20.03777778	20.43888889	20.25333333	19.82111111	20.14222222	20.75444444	20.26666667	20.55444444	20.18555556	19.99	20.37222222	20.06444444	20.26333333	20.41333333	19.96	20.63666667	20.14	20.18333333	19.95111111	19.90666667	19.97222222	20.00555556	20.18333333	20.12222222	19.79222222	19.90444444	20.05555556	19.94333333	19.98666667	19.31222222	19.15888889	18.79666667	18.52111111	18.05888889	19.55555556	19	19.94222222	18.80444444	19.35222222	19.46111111	19.72111111	19.56555556
8/11/19 11:37:43	-118.513664	42.54332612	1233.087287	8/11/19 11:38:41	18.60777778	18.93111111	18.84777778	18.72222222	18.99222222	18.76888889	18.47777778	18.71333333	19.21555556	18.80444444	19.23111111	18.60444444	18.48555556	18.99444444	18.58111111	18.77555556	18.86666667	18.43888889	19.18333333	18.58777778	18.65111111	18.49444444	18.48	18.38222222	18.39444444	18.53666667	18.57333333	18.23444444	18.35222222	18.50333333	18.28	18.53777778	17.87666667	17.99333333	17.41333333	17.09111111	16.97555556	18.07333333	17.65333333	18.39333333	17.08333333	17.76444444	17.84888889	18.14222222	17.99111111
8/11/19 11:37:44	-118.5136565	42.54332652	1232.444674	8/11/19 11:38:42	18.12777778	18.66888889	18.59666667	18.48222222	18.89444444	18.40222222	18.22777778	18.31666667	18.84333333	18.52666667	18.89111111	18.35	18.24	18.60444444	18.26	18.36888889	18.48444444	18.09111111	18.90444444	18.32	18.38	18.21222222	18.13777778	18.22555556	18.15111111	18.30111111	18.28222222	17.98777778	17.95555556	18.26444444	18.06333333	18.09777778	17.37	17.67666667	17.36111111	16.96444444	16.68555556	17.90444444	17.38	18.06444444	16.97555556	17.65666667	17.71777778	18.06444444	17.86222222
8/11/19 11:37:45	-118.5136393	42.54332493	1231.653103	8/11/19 11:38:43	17.57666667	17.97777778	17.79888889	17.54444444	17.90111111	17.69333333	17.35111111	17.63222222	18.09222222	17.75888889	18.01888889	17.53888889	17.43666667	17.84666667	17.49	17.65777778	17.74777778	17.38111111	18.08222222	17.57666667	17.66444444	17.42222222	17.38111111	17.28888889	17.4	17.48222222	17.54777778	17.30666667	17.35333333	17.62444444	17.39666667	17.25777778	16.81222222	17.16222222	16.58111111	15.81444444	16.05111111	17.2	16.69888889	17.27555556	16.34444444	16.92888889	17.12	17.26555556	17.14666667
8/11/19 11:37:46	-118.5136171	42.54332345	1230.87622	8/11/19 11:38:44	15.77888889	16.10555556	16.01222222	15.60555556	16.00666667	15.90888889	15.46444444	15.85777778	16.28333333	15.88	16.27	15.60333333	15.44222222	15.94111111	15.67777778	15.78666667	15.76888889	15.45111111	16.21222222	15.66777778	15.65	15.54666667	15.48777778	15.33444444	15.39555556	15.58777778	15.60555556	15.35222222	15.51333333	15.55444444	15.47444444	15.43555556	14.96888889	15.00333333	14.85222222	14.49111111	13.84222222	15.36111111	14.68555556	15.35222222	14.35222222	15.01111111	14.93555556	15.36	15.26222222
8/11/19 11:37:47	-118.5135961	42.54332213	1230.071619	8/11/19 11:38:45	16.40888889	16.88666667	16.70777778	16.51777778	16.83	16.52777778	16.29555556	16.57444444	17.16111111	16.70888889	16.97	16.53444444	16.3	16.69666667	16.32666667	16.51	16.60888889	16.27111111	16.99	16.45777778	16.46333333	16.25333333	16.18	16.24333333	16.21111111	16.36	16.30111111	16.20777778	16.09777778	16.44333333	16.18333333	16.2	15.52555556	15.84888889	15.46333333	15.18222222	14.80555556	16.00222222	15.53888889	16.41666667	15.20666667	15.79222222	15.84	16.13444444	16.02333333
8/11/19 11:37:48	-118.5135771	42.54332088	1229.300529	8/11/19 11:38:46	15.34111111	15.99444444	15.76	15.41555556	15.77555556	15.56666667	15.16666667	15.47777778	16.05111111	15.56444444	15.86666667	15.27555556	15.20333333	15.59444444	15.31555556	15.41	15.53111111	15.12333333	15.87333333	15.26777778	15.3	15.05444444	15.03222222	15.02111111	14.99	15.30777778	15.29111111	14.98	15.06222222	15.31333333	15.00777778	15.15555556	14.48	14.74333333	14.36333333	13.86777778	13.60777778	14.97777778	14.46666667	15.11555556	14.04888889	14.69222222	14.72222222	14.87222222	14.74444444
8/11/19 11:37:49	-118.5135594	42.54331885	1228.451829	8/11/19 11:38:47	14.05333333	14.70888889	14.64333333	14.08	14.58222222	14.57777778	14.06111111	14.36555556	14.83333333	14.47222222	14.76777778	14.16666667	13.96222222	14.42777778	14.04333333	14.12333333	14.35111111	13.84444444	14.78	14.14666667	14.08666667	13.96666667	13.84333333	13.99666667	13.94111111	14.14555556	14.14	13.84	13.88222222	13.98111111	13.96111111	13.97333333	13.31666667	13.81777778	13.04444444	13.06888889	12.56777778	13.77888889	13.19444444	14	12.99555556	13.51666667	13.57666667	13.79333333	13.67111111
8/11/19 11:37:50	-118.5135429	42.54331573	1227.661475	8/11/19 11:38:48	14.28777778	14.59555556	14.52444444	14.54111111	14.88777778	14.64	14.16	14.54222222	15.03666667	14.62111111	14.98777778	14.42444444	14.16444444	14.48777778	14.32666667	14.34333333	14.50555556	14.00222222	14.78888889	14.28111111	14.32666667	14.02555556	14.11888889	14.10555556	13.97	14.24111111	14.33888889	14.02666667	14.04888889	14.17111111	14.04777778	14.14666667	13.50555556	13.65	13.30555556	12.80555556	12.79666667	13.88666667	13.47	13.99333333	12.84	13.54444444	13.59444444	13.97555556	13.83
8/11/19 11:37:51	-118.5135253	42.54331178	1226.785349	8/11/19 11:38:49	15.14111111	15.45111111	15.42444444	15.12	15.58777778	15.35777778	15.02555556	15.18888889	15.74222222	15.25444444	15.64444444	15.11888889	14.88333333	15.34333333	14.92444444	15.02	15.20888889	14.75111111	15.55666667	14.95	14.94666667	14.75333333	14.70333333	14.71555556	14.80333333	14.84666667	14.87777778	14.59333333	14.63	14.74111111	14.63666667	14.73777778	14.14222222	14.61555556	13.67222222	13.62333333	13.14111111	14.24777778	13.87777778	14.76	13.71777778	14.19888889	14.26444444	14.53	14.35666667
8/11/19 11:37:52	-118.513509	42.54330768	1225.861471	8/11/19 11:38:50	14.22333333	14.56111111	14.75888889	14.32222222	14.66	14.41222222	14.05777778	14.32444444	14.88222222	14.43666667	14.83111111	14.18111111	13.98666667	14.49555556	14.15333333	14.26333333	14.27666667	13.79222222	14.65888889	14.15111111	14.20666667	13.94444444	13.79888889	13.84	13.84666667	14.01444444	13.99666667	13.67555556	13.62222222	13.92444444	13.71666667	13.68444444	13.28333333	13.53888889	13.55	12.75555556	12.44777778	13.36444444	13.14	13.80888889	12.63666667	13.42666667	13.37222222	13.71666667	13.40555556
8/11/19 11:37:53	-118.5135014	42.5433056	1225.031371	8/11/19 11:38:51	12.41333333	12.86555556	12.79	12.53333333	12.89555556	12.78	12.33888889	12.45666667	13.12333333	12.61333333	12.91777778	12.32555556	12.10666667	12.64666667	12.24666667	12.37	12.44555556	12.07777778	12.84777778	12.29666667	12.31666667	12.08666667	12.08444444	12.02333333	12.08111111	12.28	12.19333333	11.92555556	11.93	12.18	11.95666667	12.00888889	11.40111111	11.81333333	11.30555556	11.37555556	10.76444444	11.79333333	11.31444444	12.10777778	10.89777778	11.47777778	11.45555556	11.74222222	11.60444444
8/11/19 11:37:54	-118.5134999	42.54330496	1224.216387	8/11/19 11:38:52	14.86777778	15.40666667	15.46	15.05111111	15.52222222	15.29888889	14.91	15.13555556	15.56444444	15.25	15.60222222	15.04777778	14.77777778	15.16	14.84333333	14.94333333	15.17333333	14.61666667	15.33111111	14.69111111	14.79222222	14.59333333	14.50444444	14.51888889	14.49111111	14.62666667	14.65555556	14.41666667	14.41777778	14.53	14.50222222	14.49777778	13.85111111	14.09444444	13.85666667	13.46777778	13.06555556	14.10888889	13.88333333	14.61444444	13.46	13.94	13.95555556	14.27666667	14.07333333
8/11/19 11:37:55	-118.5134927	42.54330228	1223.48178	8/11/19 11:38:53	17.11888889	17.59888889	17.62111111	17.32333333	17.50111111	17.43222222	17.00888889	17.33111111	17.75777778	17.36666667	17.73444444	17.18444444	16.84888889	17.33555556	16.93666667	17.11666667	17.21777778	16.75888889	17.50111111	16.90888889	16.86666667	16.65555556	16.71777778	16.57888889	16.67333333	16.75666667	16.71666667	16.44555556	16.42444444	16.72888889	16.48111111	16.46666667	15.86444444	16.03444444	15.89	15.14222222	15.12333333	16.07111111	15.62555556	16.52222222	15.11333333	15.98	15.92	16.22333333	16.04444444
8/11/19 11:37:56	-118.513479	42.54329784	1222.8037	8/11/19 11:38:54	16.77222222	17.32333333	17.39666667	16.82111111	17.21666667	17.11555556	16.73888889	16.80888889	17.42444444	17.00111111	17.38888889	16.75	16.58333333	16.97111111	16.62333333	16.79222222	16.88888889	16.36888889	17.08111111	16.55666667	16.52333333	16.35	16.17666667	16.35777778	16.14	16.46333333	16.37333333	16.08222222	16.03888889	16.27666667	16.03444444	16.22666667	15.43	15.82444444	15.15777778	14.72333333	14.65666667	15.61	15.23222222	15.89888889	14.91666667	15.49333333	15.43444444	15.81555556	15.64666667
8/11/19 11:37:57	-118.5134648	42.54329363	1222.423981	8/11/19 11:38:55	19.11111111	19.43555556	19.29666667	18.88666667	19.31333333	19.28777778	18.79222222	19.04111111	19.61333333	19.17444444	19.5	18.79666667	18.73666667	19.11222222	18.74111111	18.86333333	18.99	18.51111111	19.24777778	18.72555556	18.58666667	18.46888889	18.32333333	18.44111111	18.34111111	18.60222222	18.41777778	18.11888889	18.15777778	18.40333333	18.17333333	18.26222222	17.58666667	17.79111111	17.47555556	17.07111111	16.58222222	17.97888889	17.38777778	18.18	16.96555556	17.55555556	17.54555556	17.95888889	17.67333333
8/11/19 11:37:58	-118.5134532	42.5432917	1221.9033	8/11/19 11:38:56	19.053	19.639	19.478	19.427	19.636	19.4	19.001	19.218	19.786	19.336	19.695	19.048	18.81	19.253	18.983	19.099	19.164	18.767	19.396	18.837	18.813	18.661	18.562	18.63	18.564	18.742	18.607	18.4	18.348	18.6	18.395	18.464	17.774	18.129	17.283	17.143	16.793	18.065	17.673	18.324	17.128	17.884	17.929	18.211	17.942
8/11/19 11:37:59	-118.5134466	42.5432914	1221.4445	8/11/19 11:38:57	19.55666667	19.92555556	19.69333333	19.50222222	19.84222222	19.69777778	19.26444444	19.47111111	20.09555556	19.58	19.95	19.33555556	19.06777778	19.44666667	19.15444444	19.26	19.26444444	18.94666667	19.63	19.03111111	18.99555556	18.73222222	18.75	18.72222222	18.55444444	18.83666667	18.81222222	18.53333333	18.44555556	18.64777778	18.47	18.59555556	18.11	18.25777778	17.75888889	17.15888889	17.12555556	18.07555556	17.72555556	18.51222222	17.15333333	17.87444444	17.96444444	18.18444444	18.06222222
8/11/19 11:38:00	-118.5134452	42.54329131	1220.975022	8/11/19 11:38:58	19.96333333	20.48222222	20.10222222	19.92222222	20.4	20.23555556	19.75666667	20.00111111	20.54888889	20.09111111	20.43	19.84222222	19.66222222	19.98777778	19.67777778	19.89666667	19.94444444	19.47222222	20.14888889	19.42555556	19.5	19.29777778	19.24555556	19.21222222	19.22	19.35333333	19.32111111	18.90777778	18.91888889	19.22777778	18.98777778	19.04444444	18.42333333	18.83	17.64777778	17.35222222	17.34	18.48111111	17.95333333	18.85555556	17.54888889	18.16555556	18.28444444	18.55333333	18.28888889
8/11/19 11:38:01	-118.5134388	42.5432894	1220.524426	8/11/19 11:38:59	19.57111111	20.22333333	19.76222222	19.73444444	20.10555556	19.83777778	19.40333333	19.65555556	20.25111111	19.66666667	20.09	19.49444444	19.26	19.74333333	19.29333333	19.47	19.59222222	19.05	19.83444444	19.19111111	19.13555556	18.99111111	18.83111111	18.89888889	18.83	18.99444444	19.00666667	18.64777778	18.58222222	18.86	18.60666667	18.75111111	17.97222222	18.31333333	17.70777778	17.43111111	17.29444444	18.29444444	17.82777778	18.43	17.41	17.71888889	17.97	18.28777778	18.12333333
8/11/19 11:38:02	-118.5134332	42.54328766	1220.068529	8/11/19 11:39:00	29.00777778	29.40777778	29.27	28.94444444	29.31111111	29.17333333	28.61555556	28.87111111	29.55444444	28.98666667	29.32222222	28.75111111	28.53888889	28.98333333	28.57888889	28.77666667	28.79222222	28.43	29.07444444	28.56888889	28.64555556	28.44111111	28.37	28.35444444	28.36666667	28.54777778	28.49333333	28.18333333	28.13333333	28.45666667	28.33333333	28.36444444	27.58666667	28.06333333	27.89333333	27.75444444	27.06666667	28.36	27.69	28.53777778	27.20222222	27.54	27.15888889	27.4	27.04333333
8/11/19 11:38:03	-118.5134329	42.54328786	1219.606916	8/11/19 11:39:01	26.2	26.27444444	26.44888889	26.02	26.48333333	26.32111111	25.68777778	25.80333333	26.62222222	26.03555556	26.33666667	25.87666667	25.45	26.04222222	25.68444444	25.84666667	25.81555556	25.32888889	26.12444444	25.58	25.55555556	25.25111111	25.12333333	25.16666667	25.20444444	25.20444444	25.29555556	24.86444444	24.85888889	25.15	24.98444444	25.00444444	24.26666667	24.33333333	24.30777778	23.67222222	23.36222222	24.55555556	23.96111111	24.75222222	23.67333333	23.86666667	23.75666667	23.90111111	23.54666667
8/11/19 11:38:04	-118.5134325	42.54328825	1219.29428	8/11/19 11:39:02	18.48222222	18.97555556	18.84777778	18.57777778	18.91555556	18.88111111	18.32333333	18.44111111	19.11666667	18.69444444	19.08777778	18.43555556	18.23222222	18.63666667	18.23666667	18.33555556	18.52	18.06333333	18.84	18.20555556	18.26333333	17.95666667	17.91777778	17.96111111	17.80888889	18.05	17.95222222	17.72666667	17.71444444	17.86444444	17.73111111	17.72444444	17.16888889	17.16111111	16.59111111	16.47666667	16.25333333	17.26111111	16.82333333	17.66222222	16.39888889	16.85444444	17.14555556	17.27	17.04222222
8/11/19 11:38:05	-118.5134286	42.54328797	1219.241797	8/11/19 11:39:03	26.58444444	26.99444444	27.17	26.82444444	27.26888889	27.04444444	26.63444444	26.88111111	27.62	27.01444444	27.35444444	26.74444444	26.52333333	26.97444444	26.48555556	26.74777778	26.79	26.36888889	27.02777778	26.45	26.51111111	26.15222222	26.14222222	26.16333333	26.11222222	26.21888889	26.28111111	25.98777778	25.89666667	25.98888889	25.92111111	25.77333333	25.09888889	25.49444444	24.61222222	24.62666667	24.04666667	25.08777778	24.79777778	25.49666667	24.33111111	24.63888889	24.49777778	24.67666667	24.37555556
8/11/19 11:38:06	-118.5134267	42.54328761	1219.041526	8/11/19 11:39:04	32.00666667	32.48666667	32.58444444	32.32111111	32.66222222	32.51555556	32.09222222	32.24	33.07888889	32.59111111	32.99111111	32.31	32.12888889	32.38222222	32.04777778	32.20888889	32.31444444	31.85555556	32.63444444	32.03666667	32.12333333	31.89666667	31.68222222	31.84111111	31.69222222	31.93111111	31.89	31.49111111	31.51	31.67666667	31.62777778	31.51111111	30.63777778	31.01333333	30.75222222	30.52777778	29.97444444	31.04	30.37888889	31.34111111	30.08666667	30.18888889	29.95	30.09	29.61333333
8/11/19 11:38:07	-118.5134273	42.54328806	1218.741716	8/11/19 11:39:05	19.46555556	20.4	20.15777778	20.07666667	20.33444444	20.17	20.2	20.18444444	20.87333333	20.51666667	21.02333333	20.36555556	20.14111111	20.53333333	20.27888889	20.54111111	20.64666667	20.14444444	20.99666667	20.52888889	20.51666667	20.24555556	20.19333333	20.29111111	20.25777778	20.39111111	20.45222222	20.21222222	20.16555556	20.42777778	20.24	20.4	19.82666667	20.24888889	19.28444444	18.42555556	18.53666667	18.93	19.41	19.58666667	18.13444444	18.73888889	18.91666667	19.03666667	18.77666667
8/11/19 11:38:08	-118.5134276	42.54328842	1218.548865	8/11/19 11:39:06	2.682222222	3.305555556	3.763333333	3.115555556	3.608888889	3.326666667	2.932222222	3.221111111	3.904444444	3.53	3.824444444	3.246666667	3.155555556	3.573333333	3.272222222	3.446666667	3.681111111	3.208888889	4.186666667	3.416666667	3.5	3.331111111	3.306666667	3.4	3.355555556	3.653333333	3.658888889	3.431111111	3.424444444	3.658888889	3.585555556	3.657777778	3.178888889	3.845555556	3.353333333	3.048888889	2.751111111	3.306666667	3.212222222	3.854444444	2.568888889	2.971111111	2.958888889	3.273333333	2.996666667
8/11/19 11:38:09	-118.5134277	42.54328842	1218.548723	8/11/19 11:39:07	-0.243333333	0.417777778	0.408888889	0.213333333	0.524444444	0.36	-0.154444444	0.11	0.598888889	0.328888889	0.638888889	0.043333333	-0.217777778	0.303333333	-0.02	0.086666667	0.348888889	-0.186666667	0.823333333	0.146666667	0.36	0.123333333	0.078888889	0.153333333	0.167777778	0.471111111	0.506666667	0.144444444	0.293333333	0.55	0.542222222	0.711111111	0.207777778	0.854444444	0.6	0.272222222	-0.253333333	0.818888889	0.33	1.155555556	-0.163333333	0.193333333	0.106666667	0.288888889	0.17
8/11/19 11:38:10	-118.5134277	42.54328842	1218.552087	8/11/19 11:39:08	-0.251111111	0.452222222	0.395555556	0.068888889	0.687777778	0.186666667	-0.232222222	0.077777778	0.557777778	0.175555556	0.64	-0.07	-0.196666667	0.273333333	0.026666667	0.136666667	0.344444444	-0.103333333	0.853333333	0.143333333	0.156666667	0.076666667	0.128888889	0.077777778	0.194444444	0.437777778	0.408888889	0.057777778	0.225555556	0.436666667	0.415555556	0.657777778	0.111111111	0.936666667	0.548888889	0.338888889	-0.147777778	0.662222222	0.124444444	0.995555556	-0.276666667	0.04	0.311111111	0.358888889	0.085555556
8/11/19 11:38:48	-118.5134282	42.54328795	1218.71054	8/11/19 11:39:47	25.54777778	26.44333333	26.21555556	26.01222222	26.26111111	26.37	25.85222222	26.01333333	26.83555556	26.41111111	26.86333333	26.20777778	25.97666667	26.35555556	26.00333333	26.24111111	26.41222222	25.87	26.83444444	26.10111111	26.24333333	25.85222222	25.84555556	26.06666667	26.01777778	26.07333333	26.20777778	25.75333333	25.77	26.05444444	26.03444444	26.03555556	25.20444444	25.81666667	25.05888889	24.61777778	24.35444444	24.85333333	25.13777778	25.57333333	24.08555556	24.73555556	24.59666667	24.79888889	24.37111111
8/11/19 11:38:49	-118.5134299	42.54328665	1219.794497	8/11/19 11:39:48	15.86666667	16.60111111	16.42111111	16.09666667	16.65111111	16.46444444	15.84222222	16.18	16.84555556	16.37444444	16.78111111	15.96555556	15.82111111	16.41666667	16.20666667	16.11	16.41111111	15.80555556	16.73777778	15.85444444	16.12333333	15.77555556	15.68777778	15.73888889	15.85222222	16.01888889	15.84	15.54555556	15.50888889	15.81222222	15.71333333	15.73333333	14.85222222	15.06111111	14.49777778	14.52	14.17666667	15.24	14.70888889	15.61	14.18111111	14.86	14.90444444	15.28555556	14.95333333
8/11/19 11:38:50	-118.5134311	42.5432861	1221.073542	8/11/19 11:39:49	18.22888889	18.89222222	18.74555556	18.62111111	18.84777778	18.66111111	18.13333333	18.40444444	19.3	18.59	19.25	18.43111111	18.12111111	18.67888889	18.36555556	18.54333333	18.66444444	18.13555556	18.92888889	18.13444444	18.29111111	18.02222222	17.94666667	18.00222222	18.01888889	18.20333333	18.22333333	17.75888889	17.85	18.12555556	17.86333333	17.88444444	17.02888889	17.22777778	16.65111111	16.75777778	16.18888889	17.28111111	16.90111111	17.65666667	16.25555556	17.01222222	17.06222222	17.45777778	16.99666667
8/11/19 11:38:51	-118.5134312	42.54328605	1222.318277	8/11/19 11:39:50	20.23	21.21111111	21.05777778	20.71	20.94111111	20.97	20.44666667	20.59444444	21.40777778	20.93444444	21.39	20.77777778	20.46333333	20.96	20.63333333	20.74333333	20.94333333	20.39111111	21.18222222	20.50777778	20.60333333	20.33888889	20.21777778	20.24444444	20.13666667	20.43444444	20.44666667	19.98555556	20.02555556	20.17555556	20.21888889	20.20888889	19.13777778	19.79777778	18.65555556	18.37555556	17.91888889	19.34111111	18.94555556	20.03444444	18.52777778	19.28111111	19.18888889	19.60777778	19.42444444
8/11/19 11:38:52	-118.5134309	42.54328616	1224.24162	8/11/19 11:39:51	21.56333333	22.28777778	22.06666667	21.84444444	22.31555556	22.19444444	21.56444444	21.76444444	22.66222222	22.09222222	22.46888889	21.76111111	21.54333333	22.16555556	21.58333333	21.89	22.07	21.46777778	22.32111111	21.53222222	21.7	21.38888889	21.31333333	21.32444444	21.31666667	21.48888889	21.46333333	21.09555556	20.93555556	21.24555556	21.24777778	21.29777778	20.34666667	20.36777778	19.48666667	19.43777778	18.98444444	20.41555556	19.58	20.92111111	19.48444444	20.34888889	20.28888889	20.69444444	20.34777778
8/11/19 11:38:53	-118.5134308	42.54328639	1225.474808	8/11/19 11:39:52	22.37777778	23.17222222	22.94444444	22.97222222	23.20333333	23.12333333	22.43	22.60222222	23.37111111	22.85777778	23.31111111	22.59333333	22.28222222	22.85777778	22.46666667	22.76333333	22.81888889	22.26333333	23.13888889	22.31666667	22.48333333	22.21666667	22.02333333	22.17	22.09777778	22.33555556	22.35222222	21.80888889	21.87444444	22.18888889	21.92111111	21.96888889	21.02	21.11	20.38333333	20.46	19.76222222	21.14	20.38	21.58333333	20.51333333	21.07555556	21.29444444	21.54666667	21.30222222
8/11/19 11:38:54	-118.5134309	42.54328671	1226.913832	8/11/19 11:39:53	22.56888889	23.14333333	23.06777778	22.64444444	23.25777778	23.12222222	22.42888889	22.66777778	23.53444444	22.96777778	23.44666667	22.56222222	22.39888889	22.89111111	22.5	22.78666667	22.88666667	22.27	23.23444444	22.43666667	22.58	22.24666667	22.1	22.17	22.08333333	22.26444444	22.39666667	21.74222222	21.82888889	22.12555556	22.05777778	22.14222222	21.12	21.21444444	20.47555556	20.25666667	20.03333333	21.53222222	20.73333333	21.61444444	20.23777778	21.04	21.18222222	21.57111111	21.13666667
8/11/19 11:38:55	-118.5134325	42.54328738	1228.662219	8/11/19 11:39:54	22.74	23.32111111	23.3	23.27222222	23.49	23.23	22.70333333	22.95111111	23.74	23.27777778	23.73111111	22.95444444	22.70888889	23.28444444	22.79666667	23.02333333	23.21222222	22.55	23.44555556	22.61	22.82666667	22.56333333	22.51	22.46333333	22.42555556	22.50111111	22.53444444	22.18777778	22.13111111	22.45111111	22.38777778	22.33333333	21.34777778	21.56777778	20.74888889	20.48	20.15555556	21.62222222	21.02333333	21.85111111	20.74	21.38444444	21.48888889	21.82888889	21.57777778
8/11/19 11:38:56	-118.5134394	42.5432895	1230.18776	8/11/19 11:39:55	23.22222222	23.86444444	23.66111111	23.57	23.91888889	23.68333333	23.20444444	23.37444444	24.22888889	23.75333333	24.14111111	23.56666667	23.21	23.61555556	23.33666667	23.54	23.72666667	23.14111111	23.94666667	23.08	23.34	23.03777778	22.9	22.93222222	22.95333333	23.04666667	23.01	22.69111111	22.58888889	22.84111111	22.92333333	22.88888889	21.80777778	21.87666667	21.02222222	20.63555556	20.64222222	21.87666667	21.04666667	22.41222222	21.12333333	21.81111111	22.07666667	22.27222222	21.94111111
8/11/19 11:38:57	-118.5134497	42.54329221	1231.771352	8/11/19 11:39:56	22.74888889	23.50777778	23.34777778	23.22444444	23.54222222	23.41666667	22.73555556	23.13555556	23.97222222	23.43888889	23.80111111	23.17666667	22.84777778	23.50777778	23.06333333	23.26333333	23.30333333	22.82333333	23.66111111	22.86666667	23.20666667	22.72222222	22.62666667	22.63888889	22.63444444	22.74666667	22.80333333	22.37111111	22.30444444	22.63777778	22.39777778	22.52444444	21.51222222	21.51888889	20.70666667	20.32333333	20.21111111	21.79444444	20.89777778	22.07	20.60777778	21.38555556	21.63555556	22.03888889	21.71888889
8/11/19 11:38:58	-118.5134621	42.54329525	1233.291852	8/11/19 11:39:57	22.987	23.606	23.529	23.434	23.836	23.603	22.976	23.197	24.182	23.51	23.856	23.282	23.005	23.471	23.206	23.361	23.479	22.936	23.774	22.982	23.138	22.77	22.726	22.809	22.697	22.779	22.798	22.432	22.468	22.631	22.533	22.508	21.536	21.513	20.944	20.674	20.378	21.851	21.073	22.004	20.911	21.673	21.793	22.041	21.782
8/11/19 11:38:59	-118.5134751	42.54329865	1234.037739	8/11/19 11:39:58	23.23666667	23.89333333	23.75	23.72777778	24.15333333	23.85	23.39111111	23.57333333	24.52666667	23.87444444	24.29	23.6	23.43111111	23.92555556	23.53444444	23.69666667	23.83333333	23.27444444	24.19555556	23.34111111	23.41555556	23.16777778	23.04	22.98333333	23.03777778	23.18444444	23.12777778	22.84	22.67555556	23.09444444	22.76111111	22.97777778	21.97222222	22.13444444	21.24555556	20.64555556	20.44555556	22.10555556	21.48555556	22.19888889	21.14111111	21.87777778	22.05777778	22.36777778	22.16333333
8/11/19 11:39:00	-118.5134881	42.54329844	1234.17144	8/11/19 11:39:59	24.27444444	25.13444444	24.69111111	24.72222222	25.18555556	24.86222222	24.50111111	24.67888889	25.48444444	24.99444444	25.41	24.78888889	24.51777778	24.94444444	24.51666667	24.81666667	24.96666667	24.42777778	25.25555556	24.46222222	24.59	24.26888889	24.11	24.12444444	24.27888889	24.31888889	24.32333333	23.86	23.91	24.18333333	24.05222222	24.06666667	23.20777778	23.32	22.22222222	22.08555556	21.71666667	23.09	22.39333333	23.48222222	22.26666667	23.06888889	23.26	23.64444444	23.24444444
8/11/19 11:39:01	-118.5135029	42.54328839	1234.194726	8/11/19 11:40:00	24.69555556	25.22666667	25.22888889	24.93666667	25.49222222	25.22333333	24.64888889	24.93666667	25.75555556	25.26888889	25.66888889	24.92111111	24.75666667	25.24222222	24.88666667	25.03444444	25.29777778	24.66333333	25.59777778	24.61444444	24.95111111	24.52666667	24.49888889	24.57444444	24.49	24.64	24.73555556	24.29222222	24.19333333	24.60555556	24.41333333	24.40444444	23.45666667	23.65666667	22.34444444	22.36777778	22.14777778	23.37333333	23.00666667	23.99444444	22.68222222	23.54777778	23.76222222	24.06333333	23.79777778
8/11/19 11:39:02	-118.513517	42.54327433	1234.120432	8/11/19 11:40:01	23.05222222	23.59	23.40777778	23.44444444	23.80444444	23.73333333	23.11111111	23.20777778	24.15222222	23.59555556	24.05222222	23.24555556	23.08888889	23.60555556	23.24	23.4	23.58555556	22.98333333	23.84555556	23.03333333	23.24666667	22.87222222	22.84777778	22.94333333	22.98222222	23.05	23.17555556	22.62444444	22.61777778	22.81	22.72444444	22.85333333	21.66555556	21.93888889	20.93222222	21.01666667	20.55888889	22.03777778	21.20333333	22.40666667	21.15333333	21.80666667	21.97	22.33888889	22.01777778
8/11/19 11:39:03	-118.5135246	42.54326588	1234.092848	8/11/19 11:40:02	22.53444444	23.06222222	22.89666667	22.76888889	23.26888889	23.08222222	22.49444444	22.82777778	23.59444444	23.11444444	23.53666667	22.86333333	22.56555556	23.13333333	22.69333333	22.99333333	22.97	22.45333333	23.39111111	22.47	22.7	22.35888889	22.34333333	22.37444444	22.28222222	22.37444444	22.55222222	22.04666667	22.11222222	22.41777778	22.22222222	22.27555556	21.23333333	21.53555556	20.26	20.52888889	20.07222222	21.50666667	20.89555556	21.85111111	20.46333333	21.27666667	21.33888889	21.83666667	21.50666667
8/11/19 11:39:04	-118.513528	42.54326458	1234.079048	8/11/19 11:40:03	22.92444444	23.59666667	23.68777778	23.42555556	23.83666667	23.69666667	23.24	23.37333333	24.37555556	23.62111111	24.18666667	23.30777778	23.12333333	23.65777778	23.27666667	23.50666667	23.67222222	23.07444444	23.99111111	23.10666667	23.39111111	22.98	22.93555556	22.98777778	22.95666667	23.17222222	23.11555556	22.76888889	22.66222222	22.90555556	22.91222222	22.87111111	22	21.89888889	21.06111111	20.52888889	20.54888889	21.92333333	21.19555556	22.26222222	21.05333333	21.78555556	22.08111111	22.36444444	22.11555556
8/11/19 11:39:05	-118.5135346	42.54326563	1234.02284	8/11/19 11:40:04	23.11	24.06555556	23.86444444	23.62111111	24.02777778	24.01	23.34444444	23.55	24.41888889	23.89777778	24.23333333	23.61666667	23.39	23.93	23.51222222	23.84666667	23.96333333	23.33666667	24.17555556	23.45	23.56555556	23.23	23.26666667	23.24555556	23.19777778	23.32	23.35222222	22.91111111	22.96222222	23.31333333	23.20555556	23.13777778	22.17	22.15	21.17444444	21.05333333	20.87555556	22.38555556	21.57888889	22.65666667	21.41222222	22.05	22.36111111	22.75333333	22.43444444
8/11/19 11:39:06	-118.5135439	42.54326802	1233.995855	8/11/19 11:40:05	23.64444444	24.36222222	24.19888889	24.01666667	24.61	24.43444444	23.90444444	23.94333333	24.81777778	24.36888889	24.80111111	24.12111111	23.97777778	24.44555556	24.01555556	24.29333333	24.39111111	23.84555556	24.76333333	23.89333333	24.19	23.79111111	23.68555556	23.82777778	23.73888889	23.89111111	23.87888889	23.5	23.45777778	23.83777778	23.58111111	23.70666667	22.70111111	22.78	21.64222222	21.58888889	21.25777778	22.70333333	22.01	23.16444444	21.77	22.58888889	22.81888889	23.14444444	22.90444444
8/11/19 11:39:07	-118.5135555	42.54327132	1233.990135	8/11/19 11:40:06	24.17	25.08444444	24.60777778	24.37666667	24.79888889	24.8	24.27111111	24.35777778	25.21	24.76222222	25.20666667	24.56777778	24.29222222	24.77333333	24.45333333	24.72555556	24.87222222	24.31666667	25.16666667	24.31777778	24.62	24.30333333	24.15333333	24.17555556	24.12666667	24.22888889	24.35888889	23.94666667	23.93777778	24.23	24.14222222	24.09777778	23.17666667	22.97333333	22.32444444	21.93	21.55888889	23.17888889	22.45555556	23.38444444	22.33555556	22.99888889	23.35333333	23.73777778	23.45111111
8/11/19 11:39:08	-118.5135687	42.54327495	1233.994448	8/11/19 11:40:07	24.58444444	25.52888889	25.20777778	25.13777778	25.60888889	25.33888889	24.9	25.07888889	25.96777778	25.47555556	25.87666667	25.34777778	25.02333333	25.44444444	25.11	25.41333333	25.54222222	24.91111111	25.81222222	25.01111111	25.18	24.90111111	24.87555556	24.97111111	24.89666667	25.04666667	25.05777778	24.61444444	24.66222222	24.97222222	24.85444444	24.83555556	23.80111111	23.69	22.76111111	22.55333333	22.13	23.8	23.05222222	24.30555556	23.10777778	23.76111111	24.15222222	24.53888889	24.19444444
8/11/19 11:39:09	-118.5135834	42.54327904	1233.995503	8/11/19 11:40:08	25.03	25.73888889	25.75888889	25.54666667	25.92777778	25.75222222	25.03111111	25.29111111	26.16777778	25.75888889	26.30222222	25.46222222	25.23555556	25.87888889	25.4	25.66666667	25.75333333	25.24333333	26.05888889	25.29	25.56333333	25.13555556	25.20111111	25.28666667	25.14888889	25.27777778	25.36777778	24.87888889	24.89111111	25.32555556	25.01888889	25.08444444	24.15666667	24.20444444	23.02555556	22.55333333	22.53888889	24.15	23.46888889	24.63888889	23.53	24.21888889	24.47333333	24.88444444	24.47
8/11/19 11:39:10	-118.5135992	42.54328338	1233.968316	8/11/19 11:40:09	26.82333333	27.64	27.29222222	27.16444444	27.68444444	27.43777778	26.90222222	27.18555556	28.00111111	27.56	28.05555556	27.35333333	27.11111111	27.60444444	27.29555556	27.42333333	27.70222222	27.02666667	27.97333333	27.18222222	27.34666667	27.03	27.01555556	27.09666667	27.04	27.16	27.26222222	26.73888889	26.74333333	27.10888889	27.03444444	26.99111111	26.14888889	26.26111111	25.31333333	24.89888889	24.44888889	25.74222222	25.55222222	26.52222222	25.26888889	26.04666667	26.19444444	26.71222222	26.38111111
8/11/19 11:39:11	-118.5136159	42.54328801	1233.914755	8/11/19 11:40:10	31.57	32.30666667	32.1	32.26111111	32.37666667	32.42111111	31.76888889	32.02666667	32.92777778	32.51222222	32.83333333	32.24333333	32.19	32.65888889	32.21777778	32.42444444	32.66111111	32.08222222	32.91222222	32.23777778	32.32111111	31.96777778	31.93666667	32.05777778	31.85888889	31.86666667	32.01444444	31.63444444	31.46888889	31.85444444	31.81444444	31.64444444	30.65555556	30.30333333	29.30777778	29.06666667	29.09777778	30.53	29.66555556	31.14333333	29.89777778	30.73333333	31.10222222	31.50444444	31.12333333
8/11/19 11:39:12	-118.5136328	42.54329301	1233.891132	8/11/19 11:40:11	31.51777778	32.06111111	32.18	32.10444444	32.37777778	32.43777778	31.68444444	31.99777778	32.86666667	32.41666667	32.86666667	32.19555556	32.02	32.47555556	32.12111111	32.44	32.54222222	32.03111111	32.73777778	32.11666667	32.21	31.85222222	31.71444444	31.75111111	31.76777778	31.84	31.74777778	31.41	31.41222222	31.77888889	31.50888889	31.48888889	30.46111111	30.17333333	29.00333333	29.14555556	28.65666667	30.63888889	29.55666667	30.92444444	29.98555556	30.77222222	31.01	31.37555556	31.06777778
8/11/19 11:39:13	-118.5136497	42.54329798	1233.884865	8/11/19 11:40:12	26.16333333	26.75333333	26.76111111	26.7	26.91444444	26.96444444	26.19555556	26.47	27.36444444	26.85666667	27.32222222	26.52777778	26.25111111	26.88444444	26.49333333	26.73111111	26.82	26.24	27.16444444	26.34666667	26.58	26.16222222	26.20666667	26.20444444	26.19666667	26.34222222	26.37333333	25.89333333	26.06666667	26.26444444	26.18222222	26.11555556	25.23222222	25.14777778	24.30666667	24.11222222	23.71777778	25.30111111	24.73	25.59555556	24.65444444	25.26333333	25.57444444	25.97555556	25.49444444
8/11/19 11:39:14	-118.5136667	42.5433031	1233.86994	8/11/19 11:40:13	24.15666667	24.83111111	24.88	24.67222222	25.02111111	24.92888889	24.19	24.53444444	25.38888889	24.82333333	25.39666667	24.67333333	24.39888889	24.98111111	24.58333333	24.84666667	25.10555556	24.42222222	25.28777778	24.52	24.72333333	24.39	24.34444444	24.4	24.40555556	24.53111111	24.46333333	24.19333333	24.14111111	24.41444444	24.20777778	24.38222222	23.45111111	23.48777778	22.42555556	22.48666667	21.89666667	23.44111111	22.95888889	23.78777778	22.62444444	23.44111111	23.71666667	24.10888889	23.77777778
8/11/19 11:39:15	-118.5136833	42.54330806	1233.87191	8/11/19 11:40:14	24.12555556	24.77888889	24.71777778	24.51444444	24.92888889	24.86666667	24.18555556	24.39333333	25.31444444	24.83	25.33888889	24.56222222	24.38111111	24.86	24.41	24.76555556	24.98333333	24.36	25.20333333	24.46777778	24.67333333	24.37666667	24.29555556	24.28222222	24.25555556	24.47222222	24.39777778	24.03666667	24.05111111	24.40333333	24.34	24.32444444	23.33555556	23.45666667	22.41666667	22.36888889	21.60555556	23.41333333	22.71555556	24.02222222	22.64222222	23.58777778	23.69666667	24.03333333	23.70222222
8/11/19 11:39:16	-118.5136988	42.5433127	1233.895536	8/11/19 11:40:15	23.906	24.622	24.72	24.442	24.717	24.703	24.104	24.215	25.256	24.721	25.175	24.349	24.207	24.72	24.327	24.59	24.826	24.198	25.087	24.391	24.545	24.171	24.06	24.118	24.222	24.311	24.306	23.863	23.945	24.316	24.239	24.124	23.294	23.475	22.251	21.842	21.918	23.379	22.856	23.556	22.437	23.126	23.516	23.815	23.546
8/11/19 11:39:17	-118.5137161	42.54331794	1233.913103	8/11/19 11:40:16	25.48111111	26.2	26.35444444	25.95444444	26.36888889	26.24	25.74555556	25.97555556	26.91333333	26.41333333	26.81777778	26.14222222	25.9	26.44666667	26.09666667	26.33666667	26.57444444	25.89222222	26.76555556	26.06888889	26.17	25.85666667	25.89333333	25.93555556	25.97777778	25.96666667	26.15444444	25.65111111	25.71777778	26.05555556	25.79444444	25.88444444	24.88888889	24.85	23.82	23.44888889	23.35444444	24.63888889	24.32222222	25.29222222	24.08	24.92444444	25.02	25.61666667	25.42777778
8/11/19 11:39:18	-118.5137353	42.54332375	1233.94236	8/11/19 11:40:17	25.84555556	26.47333333	26.51	26.22	26.58333333	26.59222222	25.92444444	26.17	27.12222222	26.59333333	26.95222222	26.27666667	26.11333333	26.61	26.26666667	26.53333333	26.71666667	26.13666667	27.06666667	26.18333333	26.45	26.05111111	26.02333333	26.01111111	26.07777778	26.22444444	26.35444444	25.87	25.86222222	26.33555556	26.23777778	26.03555556	25.18444444	24.80222222	23.96111111	23.92555556	23.67111111	25.18111111	24.28444444	25.58888889	24.37666667	25.22888889	25.50888889	25.90777778	25.63
8/11/19 11:39:19	-118.5137526	42.54332888	1233.955923	8/11/19 11:40:18	24.95555556	25.93	25.52888889	25.46555556	25.9	25.83333333	25.27111111	25.48222222	26.35666667	25.83777778	26.31666667	25.66555556	25.33111111	25.99333333	25.64333333	25.87666667	26.05111111	25.47666667	26.4	25.57444444	25.81666667	25.43333333	25.33555556	25.44444444	25.29555556	25.59444444	25.69111111	25.22111111	25.21111111	25.68777778	25.58	25.47555556	24.40888889	24.51111111	23.27	23.17555556	22.88666667	24.55777778	23.94	24.97888889	23.63444444	24.51666667	24.88222222	25.21222222	24.87888889
8/11/19 11:39:20	-118.5137685	42.54333362	1233.957652	8/11/19 11:40:19	25.08888889	25.9	26.03444444	25.81111111	26.11333333	26.04888889	25.52111111	25.67444444	26.55888889	26.11333333	26.57777778	25.82	25.50777778	26.18888889	25.81333333	25.99	26.20777778	25.63111111	26.46111111	25.70333333	25.94	25.64666667	25.45777778	25.55888889	25.59888889	25.70444444	25.84666667	25.34111111	25.31	25.71888889	25.65444444	25.61333333	24.65333333	24.59222222	23.34	23.43111111	22.82111111	24.74444444	23.86777778	25.14	23.88	24.70444444	24.94888889	25.41555556	25.1
8/11/19 11:39:21	-118.5137867	42.54333891	1233.949876	8/11/19 11:40:20	24.42222222	24.92666667	25.16111111	25.01	25.19777778	25.24666667	24.67555556	24.93666667	25.79777778	25.28111111	25.80555556	24.99888889	24.75333333	25.37	24.95	25.22666667	25.40333333	24.79666667	25.69666667	24.88444444	25.14333333	24.74333333	24.70111111	24.81	24.72666667	24.88666667	24.90222222	24.61444444	24.51	24.91777778	24.73444444	24.70222222	23.66333333	23.64111111	22.69222222	22.53444444	22.19555556	23.98555556	23.28666667	24.32111111	23.10888889	23.80111111	23.98666667	24.54111111	24.12111111
8/11/19 11:39:22	-118.5138071	42.54334459	1233.954694	8/11/19 11:40:21	23.95333333	24.74888889	24.52555556	24.47	24.98777778	24.66666667	24.24444444	24.45111111	25.33444444	24.86222222	25.19	24.59222222	24.25444444	24.84888889	24.47333333	24.79777778	24.92888889	24.20666667	25.20555556	24.35777778	24.58	24.22222222	24.19555556	24.31	24.29666667	24.50777778	24.48222222	24.05222222	24.05444444	24.36555556	24.16111111	24.42666667	23.34111111	23.55222222	22.27	22.24111111	21.92222222	23.25333333	22.78	23.88	22.43555556	23.36888889	23.55555556	23.92111111	23.67666667
8/11/19 11:39:23	-118.5138256	42.54334985	1233.96358	8/11/19 11:40:22	26.11777778	26.91222222	26.90444444	26.84222222	27.03	27.09	26.54	26.81555556	27.54	27.11777778	27.58111111	26.92555556	26.63333333	27.24555556	26.76222222	27.02333333	27.28888889	26.63333333	27.54555556	26.79111111	27.09	26.54888889	26.62888889	26.64444444	26.59111111	26.87	26.86444444	26.46888889	26.48	26.82888889	26.70333333	26.75555556	25.82444444	25.87111111	24.76444444	24.42444444	24.24222222	25.52111111	24.95	26.20444444	24.84222222	25.76666667	26.13555556	26.47222222	26.18333333
8/11/19 11:39:24	-118.5138442	42.54335504	1233.973987	8/11/19 11:40:23	30.03666667	30.80666667	30.64111111	30.65666667	31.05111111	30.85111111	30.41222222	30.58222222	31.48111111	30.99	31.40222222	30.85666667	30.57111111	31.02888889	30.64333333	30.90222222	31.15111111	30.58333333	31.34666667	30.65555556	30.8	30.56333333	30.31555556	30.40222222	30.39333333	30.61222222	30.53444444	30.00555556	30.07222222	30.36666667	30.38777778	30.28444444	29.35555556	29.06444444	27.59111111	27.84	27.81444444	29.11111111	28.81222222	29.82888889	28.36333333	29.40222222	29.81222222	29.99777778	29.80777778
8/11/19 11:39:25	-118.5138632	42.54336052	1233.989203	8/11/19 11:40:24	31.67222222	32.33666667	32.16777778	32.16777778	32.28666667	32.38555556	31.79777778	31.94444444	32.97444444	32.38444444	32.72777778	32.34444444	32.09	32.57444444	32.14	32.45888889	32.59666667	32.01777778	32.64666667	32.06666667	32.08333333	31.94555556	31.57555556	31.59555556	31.69222222	31.74888889	31.74222222	31.41777778	31.24222222	31.81	31.58	31.57777778	30.36	30.19111111	29.23777778	29.17444444	28.72111111	30.51444444	29.80666667	30.87666667	29.80888889	30.58	30.89888889	31.44888889	31.10777778
8/11/19 11:39:26	-118.5138824	42.54336598	1233.996087	8/11/19 11:40:25	30.02888889	30.67777778	30.53888889	30.35444444	30.64777778	30.64444444	30.03555556	30.14	31.16444444	30.67555556	31.07333333	30.39111111	30.11555556	30.70777778	30.27666667	30.60333333	30.66444444	30.11666667	30.97444444	30.38888889	30.50333333	30.14555556	29.98333333	30.10444444	30.02888889	30.17777778	30.32222222	29.80222222	29.79666667	30.15444444	29.98888889	30.03111111	28.89777778	29.00555556	27.76222222	27.78333333	27.58222222	29.06333333	28.41333333	29.60888889	28.43444444	28.99111111	29.50222222	29.87666667	29.39111111
8/11/19 11:39:27	-118.5139016	42.54337135	1233.99434	8/11/19 11:40:26	30.01444444	30.64222222	30.51222222	30.34777778	30.67444444	30.65444444	29.88666667	30.23888889	31.23666667	30.6	31.25111111	30.45666667	30.10888889	30.74	30.4	30.66666667	30.80555556	30.22666667	30.98	30.36333333	30.49666667	30.15666667	30.12444444	30.11777778	30.12	30.22111111	30.27111111	29.89111111	29.82555556	30.10333333	30.09555556	30.00444444	28.98777778	28.86222222	27.77222222	27.82222222	27.48666667	29.01555556	28.58555556	29.59444444	28.35111111	29.25555556	29.62222222	30.07222222	29.58444444
8/11/19 11:39:28	-118.5139212	42.54337662	1233.999423	8/11/19 11:40:27	30.29666667	30.92444444	31.18666667	30.95222222	31.14555556	31.32444444	30.65555556	30.90222222	31.80555556	31.25888889	31.75888889	31.09	30.79111111	31.35888889	30.99666667	31.22333333	31.38777778	30.95111111	31.70888889	30.95666667	31.06	30.77333333	30.75111111	30.69777778	30.60444444	30.68333333	30.78222222	30.41666667	30.32111111	30.69666667	30.53222222	30.62222222	29.54555556	29.48222222	28.63666667	28.32666667	27.90888889	29.48111111	28.88222222	29.96777778	28.71777778	29.71111111	30.04444444	30.53	30.23
8/11/19 11:39:29	-118.5139417	42.54338222	1234.025868	8/11/19 11:40:28	29.79888889	30.30222222	30.38888889	30.29222222	30.5	30.40444444	29.97444444	30.11111111	31.05	30.50666667	31.00777778	30.29666667	30.02333333	30.64111111	30.22	30.38333333	30.59777778	30.19111111	30.92444444	30.16888889	30.22555556	29.93777778	29.86888889	29.92666667	29.89555556	29.88333333	30.09	29.56333333	29.61555556	30.02666667	29.81222222	29.77777778	28.86777778	28.72555556	27.37555556	27.46222222	27.13333333	28.79333333	28.00555556	29.1	28.15222222	28.94555556	29.43333333	29.70555556	29.29777778
8/11/19 11:39:30	-118.5139619	42.54338809	1234.037039	8/11/19 11:40:29	26.72555556	27.48444444	27.17777778	27.32777778	27.56888889	27.51444444	26.93222222	27.12	27.98111111	27.58444444	27.85111111	27.23222222	27.01	27.60111111	27.17777778	27.36333333	27.66111111	27.02111111	27.87444444	27.10555556	27.35666667	26.91888889	26.70777778	26.89666667	26.88333333	27.04333333	27.15444444	26.70222222	26.65	27.05555556	26.97777778	26.86666667	25.69777778	25.71222222	24.72333333	24.45111111	24.20555556	25.99666667	25.26222222	26.59333333	25.26888889	26.16222222	26.42111111	26.89	26.44111111
8/11/19 11:39:31	-118.5139816	42.54339395	1234.01482	8/11/19 11:40:30	23.82333333	24.68888889	24.54777778	24.38222222	24.80555556	24.68222222	24.09222222	24.18666667	25.13111111	24.62111111	25.08333333	24.22666667	24.01444444	24.61111111	24.21	24.44555556	24.67111111	24.00666667	25.01555556	24.16222222	24.38333333	23.95444444	23.92555556	24.03555556	23.98666667	24.16	24.28111111	23.77444444	23.79	24.21333333	24.03333333	24.15111111	23.16555556	22.98666667	22.36444444	21.98	21.84666667	23.31666667	22.96666667	23.74888889	22.57555556	23.24666667	23.53	23.92666667	23.67444444
8/11/19 11:39:32	-118.5140011	42.54339962	1233.977226	8/11/19 11:40:31	24	24.87444444	24.78555556	24.72777778	25.06111111	25.00111111	24.44	24.61222222	25.56111111	24.96222222	25.47	24.70777778	24.34888889	25.01888889	24.63	24.88666667	25.06111111	24.43777778	25.33333333	24.55111111	24.79	24.40666667	24.45555556	24.48777778	24.49777778	24.52333333	24.67111111	24.24888889	24.31333333	24.61333333	24.48111111	24.57777778	23.52666667	23.72222222	22.56666667	22.42666667	22.09111111	23.53	23.45888889	24.00888889	22.70222222	23.71555556	23.82	24.23888889	24.01888889
8/11/19 11:39:33	-118.5140219	42.54340572	1233.903716	8/11/19 11:40:32	27.81555556	28.36	28.69777778	28.41888889	28.76111111	28.64666667	27.99111111	28.34	29.15444444	28.63777778	29.12111111	28.37444444	28.17333333	28.73666667	28.38777778	28.71333333	28.79777778	28.17111111	29.16666667	28.34777778	28.52777778	28.11111111	28.21555556	28.22	28.16777778	28.26777778	28.34888889	27.83444444	27.91111111	28.25555556	28.18222222	28.39555556	27.32333333	27.33111111	26.38111111	26.18666667	25.85111111	27.07888889	26.75111111	27.72444444	26.59333333	27.23444444	27.76444444	28.05888889	27.82555556
8/11/19 11:39:34	-118.5140443	42.54341216	1233.847926	8/11/19 11:40:33	29.361	29.819	29.975	29.902	30.107	30.13	29.506	29.632	30.438	30.004	30.51	29.73	29.485	30.049	29.747	29.963	30.172	29.608	30.465	29.736	29.898	29.563	29.489	29.52	29.539	29.652	29.639	29.238	29.219	29.751	29.629	29.496	28.436	28.391	27.274	27.135	26.903	28.773	27.985	29.228	28.066	28.799	29.132	29.579	29.151
8/11/19 11:39:35	-118.5140681	42.54341873	1233.844681	8/11/19 11:40:34	23.37888889	24.19888889	24.12111111	24.2	24.29444444	24.29777778	23.46	23.86111111	24.66666667	24.09777778	24.55888889	23.72777778	23.61777778	24.14111111	23.78888889	23.90666667	24.24	23.58	24.42333333	23.61	23.81444444	23.58333333	23.54222222	23.58555556	23.58555556	23.73	23.72777778	23.41777778	23.48888889	23.63888889	23.60555556	23.64	22.64666667	22.72888889	21.98888889	21.91888889	21.55	22.97111111	22.48111111	23.61333333	22.16666667	22.87222222	23.05666667	23.44666667	23.08888889
8/11/19 11:39:36	-118.5140928	42.54342552	1233.85504	8/11/19 11:40:35	19.05111111	19.93333333	19.81	19.55222222	20.03444444	19.82	19.23888889	19.35	20.23444444	19.78111111	20.21333333	19.37888889	19.03	19.69777778	19.30888889	19.50333333	19.64444444	19.05444444	19.98444444	19.16777778	19.40333333	19.06444444	19.02	19.04555556	19.09555556	19.23888889	19.29666667	18.89222222	18.82333333	19.19888889	19.11555556	19.16444444	18.30777778	18.51444444	17.78888889	17.58666667	17.21888889	18.46	18.03888889	19.11444444	17.67222222	18.25111111	18.5	18.86666667	18.39777778
8/11/19 11:39:37	-118.514119	42.54343285	1233.867342	8/11/19 11:40:36	19.11777778	20.16333333	19.91777778	19.79777778	20.16444444	19.98555556	19.48	19.62666667	20.51	19.88555556	20.33222222	19.63666667	19.25444444	19.93666667	19.49555556	19.73666667	19.96666667	19.28444444	20.16222222	19.47666667	19.55444444	19.17777778	19.18444444	19.23888889	19.3	19.45333333	19.56777778	19.07555556	19.13444444	19.61222222	19.46333333	19.61777778	18.55666667	18.89444444	18.15666667	17.85	17.66777778	18.82555556	18.42222222	19.17444444	17.97555556	18.46111111	18.75888889	19.07	18.79111111
8/11/19 11:39:38	-118.5141473	42.54344073	1233.885835	8/11/19 11:40:37	26.79333333	27.82666667	27.32111111	27.33333333	27.66777778	27.46555556	26.94888889	27.16888889	28.13555556	27.51666667	27.99	27.16777778	26.97666667	27.58333333	27.20222222	27.38888889	27.61888889	26.89222222	27.82444444	26.92888889	27.26	26.88333333	26.88666667	26.96777778	26.86333333	27.11222222	27.17555556	26.74	26.85777778	27.17666667	27.08555556	27.10222222	26.27	26.55	25.36333333	25.45555556	25.03888889	26.32	25.85666667	26.90333333	25.53222222	26.25888889	26.48222222	26.92555556	26.64777778
8/11/19 11:39:39	-118.5141773	42.54344899	1233.912	8/11/19 11:40:38	26.69777778	27.41666667	27.17	27.43	27.69111111	27.61777778	26.88111111	27.14555556	28.11555556	27.40111111	27.90222222	27.22888889	26.96111111	27.51222222	27.15111111	27.41	27.57222222	26.87333333	27.84888889	27.02333333	27.19888889	26.82111111	26.84777778	26.92	26.93	26.97333333	27.03555556	26.59111111	26.68111111	27.03222222	26.93666667	27.04	25.91555556	25.94555556	24.68333333	24.75444444	24.58888889	26.12777778	25.34888889	26.72111111	25.50666667	26.26444444	26.46222222	26.80222222	26.46555556
8/11/19 11:39:40	-118.5142084	42.54345751	1233.921623	8/11/19 11:40:39	21.31888889	22.00555556	21.82666667	21.71444444	22.40777778	21.99	21.52888889	21.61444444	22.53888889	22.05	22.54666667	21.68444444	21.45777778	22.10888889	21.67	21.93333333	22.11666667	21.46666667	22.38888889	21.48555556	21.64333333	21.42444444	21.30111111	21.54555556	21.38888889	21.52333333	21.46777778	21.14444444	21.24222222	21.56555556	21.41444444	21.42666667	20.61	20.78888889	19.62888889	19.63111111	19.45333333	20.56777778	20.31111111	21.12111111	19.57777778	20.53111111	20.82111111	21.03222222	20.71888889
8/11/19 11:39:41	-118.5142409	42.54346658	1233.897116	8/11/19 11:40:40	22.14888889	22.94222222	22.82	22.72	23.13333333	23.05777778	22.41444444	22.64666667	23.58333333	23.02555556	23.56111111	22.71111111	22.47888889	22.95777778	22.65666667	22.85666667	23.11	22.37333333	23.37444444	22.46333333	22.67	22.23444444	22.31666667	22.36888889	22.38555556	22.59333333	22.54777778	22.22555556	22.03555556	22.44	22.38333333	22.34666667	21.66	21.53666667	20.80888889	20.55777778	20.25888889	21.67	20.87555556	22.18333333	20.76222222	21.35444444	21.84	22.11444444	21.79444444
8/11/19 11:39:42	-118.5142747	42.54347603	1233.875742	8/11/19 11:40:41	21.06	21.99111111	21.95	21.78222222	21.79666667	21.85111111	21.2	21.53555556	22.35	21.96555556	22.27888889	21.51666667	21.24888889	21.79444444	21.41666667	21.68	21.93555556	21.21777778	22.19888889	21.25888889	21.61	21.18888889	21.07666667	21.08888889	21.18333333	21.32	21.40222222	20.94666667	20.99	21.35444444	21.29222222	21.13777778	20.24444444	20.42555556	19.48888889	19.35	18.99555556	20.49888889	20.01222222	21.10444444	19.47222222	20.23666667	20.32888889	20.76888889	20.40444444
8/11/19 11:39:43	-118.5143096	42.54348605	1233.882806	8/11/19 11:40:42	19.29666667	20.14111111	20.10888889	19.88777778	20.27333333	20.07	19.56111111	19.69666667	20.62	20.09666667	20.54777778	19.65444444	19.42888889	19.95333333	19.62111111	19.73666667	19.94777778	19.29	20.24555556	19.45111111	19.61333333	19.27	19.22222222	19.25888889	19.15444444	19.39666667	19.41333333	18.93555556	19.08555556	19.25	19.14111111	19.20888889	18.34888889	18.54555556	17.57666667	17.37111111	17.23666667	18.55	18.13111111	19.14444444	17.61888889	18.13333333	18.46777778	18.71444444	18.27444444
8/11/19 11:39:44	-118.5143453	42.5434964	1233.896035	8/11/19 11:40:43	19.17888889	19.88888889	19.86333333	19.42111111	19.98444444	19.79444444	19.23444444	19.31222222	20.28777778	19.65555556	20.13	19.29555556	19.12222222	19.62888889	19.17888889	19.45333333	19.61666667	18.96444444	19.89777778	19.01333333	19.22	18.93888889	18.80888889	18.89444444	18.85777778	19.04222222	19.11222222	18.42222222	18.70333333	19.04888889	18.82777778	18.92444444	17.99555556	18.22555556	17.28222222	17.23666667	16.80777778	18.19888889	17.73888889	18.60444444	17.01555556	17.93222222	18.10666667	18.42333333	17.99555556
8/11/19 11:39:45	-118.5143806	42.54350664	1233.88666	8/11/19 11:40:44	20.14888889	20.92222222	20.74222222	20.76111111	21.04333333	21.00555556	20.28888889	20.52111111	21.37555556	20.93111111	21.31555556	20.66444444	20.24111111	20.88555556	20.39	20.65333333	20.74222222	20.04777778	21.16555556	20.15	20.4	20.02555556	19.98111111	20.02	20.06222222	20.12444444	20.07666667	19.68777778	19.75	20.12444444	19.91333333	20.04888889	18.93888889	19.28777778	18.19666667	18.27777778	17.93888889	19.36333333	18.79777778	19.75333333	18.00111111	18.80888889	19.05888889	19.36	19.00444444
8/11/19 11:39:46	-118.5144156	42.54351661	1233.865119	8/11/19 11:40:45	22.43666667	23.42	23.05444444	23.17888889	23.35222222	23.17444444	22.67	22.72111111	23.65888889	23.00111111	23.56444444	22.69444444	22.50222222	23.13222222	22.61333333	22.77	22.98666667	22.34777778	23.23555556	22.33888889	22.62111111	22.18333333	22.20888889	22.22555556	22.16111111	22.29777778	22.42333333	21.86111111	21.85555556	22.27	22.14555556	22.14666667	21.33777778	21.28777778	20.66666667	20.17555556	20.05333333	21.52555556	20.74888889	21.84888889	20.18777778	20.84888889	21.21444444	21.46111111	20.99222222
8/11/19 11:39:47	-118.5144513	42.54352672	1233.860461	8/11/19 11:40:46	23.65222222	24.51111111	24.41	24.04888889	24.46444444	24.32888889	23.72222222	23.87444444	24.76111111	24.20888889	24.66666667	23.87444444	23.49888889	24.13444444	23.59888889	23.87333333	24.04777778	23.34666667	24.25	23.40111111	23.55333333	23.24	23.07555556	23.22222222	23.19111111	23.29777778	23.33888889	22.78	22.80777778	23.16444444	23.04666667	23.14666667	22.27444444	22.21333333	21.77555556	21.67888889	21.22111111	22.48222222	21.74333333	22.75333333	21.24777778	22.01444444	22.05444444	22.20555556	21.90777778
8/11/19 11:39:48	-118.5144868	42.54353658	1233.871417	8/11/19 11:40:47	26.66111111	27.50555556	27.47666667	27.43444444	27.61888889	27.46888889	26.71666667	26.99777778	27.81	27.29222222	27.84111111	27.00666667	26.66888889	27.31	26.75111111	26.97666667	27.10444444	26.55666667	27.36555556	26.55666667	26.70111111	26.34111111	26.21	26.33222222	26.22222222	26.36333333	26.40888889	25.86888889	25.82777778	26.33111111	26.19444444	26.18666667	25.23444444	25.46222222	24.61222222	24.24777778	23.86	25.15555556	24.92555556	25.62666667	24.15111111	24.67444444	25.03777778	25.39888889	24.80666667
8/11/19 11:39:49	-118.5145217	42.54354638	1233.892048	8/11/19 11:40:48	33.63777778	34.18666667	34.23333333	34.08777778	34.25	34.22333333	33.48333333	33.48	34.53222222	34.02888889	34.50444444	33.86777778	33.51666667	34.08666667	33.59111111	33.88333333	33.98111111	33.31	34.09777778	33.30666667	33.45	33.01111111	32.91333333	32.84444444	32.84666667	32.90555556	32.82333333	32.37	32.37222222	32.63777778	32.63333333	32.56	31.70555556	31.69888889	30.89111111	30.66555556	30.27555556	31.71666667	30.90555556	32.07888889	30.53111111	31.05222222	31.22333333	31.50333333	31.10111111
8/11/19 11:39:50	-118.5145574	42.54355617	1233.907684	8/11/19 11:40:49	34.52555556	35.32444444	35.04444444	35.21333333	35.30444444	35.09222222	34.40888889	34.66444444	35.53666667	35.16444444	35.58555556	34.92222222	34.42111111	35.01666667	34.5	34.76	35.05111111	34.25666667	35.19888889	34.28333333	34.54777778	34.11333333	33.96222222	33.92666667	33.87333333	33.98	33.97333333	33.45111111	33.23666667	33.73222222	33.64333333	33.52888889	32.81777778	32.69555556	31.63555556	31.68666667	31.44333333	32.55555556	32.06333333	32.84222222	31.34888889	32.00666667	32.24111111	32.59222222	32.10444444
8/11/19 11:39:51	-118.5145934	42.54356604	1233.911648	8/11/19 11:40:50	36.987	37.545	37.324	37.348	37.408	37.173	36.696	36.808	37.868	37.341	37.771	36.985	36.6	37.203	36.728	36.928	37.072	36.381	37.308	36.376	36.682	36.137	36.004	36.169	36.082	36.117	36.066	35.567	35.596	35.785	35.678	35.736	34.644	34.854	33.568	33.646	33.089	34.465	33.992	34.91	33.346	34.004	34.269	34.479	33.957
8/11/19 11:39:52	-118.5146295	42.54357601	1233.91031	8/11/19 11:40:51	37.08111111	37.74777778	37.49111111	37.41777778	37.6	37.50111111	36.88333333	36.98777778	38.01777778	37.48555556	37.91777778	37.13555556	36.80222222	37.28333333	36.87111111	37.15666667	37.35666667	36.49666667	37.40222222	36.49222222	36.77	36.29111111	36.25777778	36.29555556	36.22444444	36.28333333	36.19111111	35.71555556	35.66	35.87333333	35.76222222	35.61333333	34.75333333	34.65444444	33.74	33.80111111	33.57555556	34.76777778	34.19555556	35.43777778	33.52777778	34.05111111	34.34333333	34.68444444	34.10444444
8/11/19 11:39:53	-118.5146651	42.54358595	1233.91263	8/11/19 11:40:52	28.21555556	29.00888889	28.97111111	28.67444444	28.89666667	28.79333333	28.00666667	28.10444444	29.02555556	28.45666667	28.91333333	28.05888889	27.75888889	28.37333333	27.89888889	28.17888889	28.31777778	27.62888889	28.47555556	27.54444444	27.80222222	27.42444444	27.45222222	27.35555556	27.40111111	27.45666667	27.53888889	27.00333333	26.95444444	27.42333333	27.38777778	27.30666667	26.60333333	27.00888889	26.12555556	25.90555556	25.76777778	26.73444444	26.13333333	27.26777778	25.69444444	26.17888889	26.23777778	26.51888889	26.08
8/11/19 11:39:54	-118.5147007	42.54359569	1233.874906	8/11/19 11:40:53	32.73222222	33.17777778	33.10666667	33.05666667	33.26333333	32.98	32.34777778	32.49777778	33.53888889	32.95555556	33.37555556	32.60333333	32.31666667	32.87	32.35777778	32.58111111	32.86333333	32.14	32.87111111	32.13777778	32.26444444	31.89888889	31.69111111	31.71555556	31.67111111	31.71555556	31.73444444	31.37555556	31.23555556	31.70111111	31.62222222	31.52	30.63555556	31.02777778	30.16111111	29.68	29.17111111	30.41222222	30.10444444	30.89444444	29.43888889	29.93444444	30.21888889	30.56888889	30.08333333
8/11/19 11:39:55	-118.5147369	42.54360569	1233.843055	8/11/19 11:40:54	34.35777778	35.08	34.91444444	34.88666667	34.89444444	34.96555556	34.22333333	34.15888889	35.16888889	34.72888889	35.08111111	34.38	34.13555556	34.59222222	34	34.36666667	34.54333333	33.76222222	34.65777778	33.70777778	33.97333333	33.54666667	33.35666667	33.42333333	33.28	33.21555556	33.24444444	32.80888889	32.63888889	32.99666667	33.18111111	32.94222222	32.15222222	32.00333333	31.37222222	31.11333333	30.89111111	32.26666667	31.67111111	32.53555556	31.05222222	31.55666667	31.61	32.02666667	31.52222222
8/11/19 11:39:56	-118.5147737	42.5436159	1233.827777	8/11/19 11:40:55	35.32	35.80777778	35.46	35.32666667	35.40222222	35.38111111	34.63111111	34.63222222	35.82333333	35.29555556	35.60666667	34.96888889	34.63888889	35.16666667	34.64333333	34.98	35.14333333	34.34555556	35.36555556	34.41555556	34.62777778	34.21555556	34.03555556	34.07444444	34.10555556	33.98222222	34.06222222	33.56666667	33.45444444	33.76555556	33.81666667	33.67555556	32.68222222	33.08222222	31.96111111	32.16444444	31.69555556	32.72777778	32.04777778	32.99222222	31.09111111	31.78444444	31.89777778	32.19888889	31.62777778
8/11/19 11:39:57	-118.5148096	42.54362608	1233.84154	8/11/19 11:40:56	34.33111111	35.00555556	34.51333333	34.48555556	34.50111111	34.48888889	33.78333333	33.86555556	34.72666667	34.29	34.77333333	33.96666667	33.59	34.18	33.75555556	33.96777778	34.07222222	33.37555556	34.31111111	33.38777778	33.59777778	33.14222222	33.03333333	33.03111111	32.99888889	32.95	32.89666667	32.46666667	32.43222222	32.82555556	32.73444444	32.62222222	31.65222222	31.87333333	31.17777778	30.84888889	30.78111111	31.92	31.03888889	32.1	30.33	30.78777778	31.04111111	31.20444444	30.73444444
8/11/19 11:39:58	-118.5148448	42.54363617	1233.882219	8/11/19 11:40:57	30.97	31.51222222	31.41	31.33444444	31.41333333	31.20888889	30.63333333	30.70555556	31.64777778	31.04222222	31.42888889	30.65222222	30.26444444	30.75555556	30.36333333	30.56333333	30.66444444	30.11111111	30.90555556	29.94111111	30.20666667	29.70444444	29.60555556	29.74222222	29.60666667	29.57111111	29.7	29.20555556	29.26444444	29.61555556	29.44666667	29.60444444	28.52222222	28.94	27.96444444	27.86111111	27.33666667	28.54555556	28.02	29.00111111	27.38333333	27.95555556	28.16444444	28.42666667	27.92666667
8/11/19 11:39:59	-118.5148808	42.54364642	1233.90031	8/11/19 11:40:58	29.42222222	30.13	30.02111111	29.83333333	30.14666667	29.93444444	29.02777778	29.21777778	30.19111111	29.61444444	29.98111111	29.18444444	28.83111111	29.38666667	28.89555556	29.04333333	29.20888889	28.55111111	29.43888889	28.5	28.68666667	28.16222222	28.08888889	28.17444444	28.01666667	28.10333333	28.20333333	27.67777778	27.65888889	28.12333333	27.95666667	27.81777778	27.06555556	27.23333333	26.64444444	26.84888889	25.98222222	27.14	26.43	27.55666667	25.97777778	26.63888889	26.62777778	27.12444444	26.44
8/11/19 11:40:00	-118.5149175	42.54365685	1233.907174	8/11/19 11:40:59	25.80777778	26.19888889	26.16222222	25.83666667	26.34777778	26.10111111	25.32444444	25.43888889	26.52222222	25.82	26.20888889	25.41222222	24.96666667	25.57444444	25.00666667	25.21777778	25.48777778	24.66777778	25.62666667	24.61444444	24.82444444	24.34222222	24.31666667	24.45111111	24.35444444	24.43888889	24.46777778	23.97444444	23.95888889	24.32888889	24.16333333	24.32	23.40888889	23.64111111	23.24555556	23.08888889	22.66222222	23.70444444	23.21	24.09888889	22.37888889	22.93	23.15444444	23.32	22.89666667
8/11/19 11:40:01	-118.5149541	42.54366732	1233.923506	8/11/19 11:41:00	22.37111111	23.29111111	23.11555556	22.78777778	23.04666667	23.02111111	22.23	22.42444444	23.36888889	22.76222222	23.17	22.23	22.04222222	22.56222222	22.09666667	22.25333333	22.57	21.75777778	22.67111111	21.64444444	21.94666667	21.53222222	21.40444444	21.33111111	21.40222222	21.54222222	21.53777778	21.01333333	21.02444444	21.47777778	21.31444444	21.37333333	20.36777778	20.91555556	20.07777778	19.92333333	19.56777778	20.72555556	20.35666667	21.31666667	19.46333333	20.06888889	20.28888889	20.48888889	20.04555556
8/11/19 11:40:02	-118.5149907	42.54367813	1233.94444	8/11/19 11:41:01	25.17	26.06555556	25.90222222	25.61	25.83111111	25.63888889	25.14333333	25.26666667	26.09666667	25.56888889	25.96333333	25.14888889	24.82666667	25.34888889	24.90888889	25.17222222	25.19111111	24.52222222	25.41777778	24.59333333	24.67666667	24.36555556	24.18	24.29	24.14	24.28444444	24.26222222	23.74666667	23.86444444	24.21444444	24.16333333	24.09333333	23.14888889	23.68	22.87111111	23.01	22.09111111	23.40666667	23.03666667	23.88666667	22.20333333	22.68444444	22.88333333	23.20777778	22.81333333
8/11/19 11:40:03	-118.5150266	42.54368876	1233.967916	8/11/19 11:41:02	30.18555556	30.80555556	30.67555556	30.52555556	30.52222222	30.62333333	29.95444444	29.93888889	30.97555556	30.36888889	30.91555556	30.05333333	29.75333333	30.29	29.79	30.05333333	30.19777778	29.50666667	30.23111111	29.38888889	29.55666667	29.12444444	29.01888889	29.05111111	29.05444444	29.22222222	29.16333333	28.69111111	28.67666667	29.06	28.90666667	28.95111111	28.07111111	28.10333333	27.12111111	27.09222222	26.57111111	27.86444444	27.44888889	28.23444444	26.81888889	27.29666667	27.44333333	27.90555556	27.50888889
8/11/19 11:40:04	-118.5150636	42.5436998	1233.968203	8/11/19 11:41:03	28.28777778	29.10333333	28.83444444	28.68777778	28.96666667	28.75777778	28.06333333	28.32777778	29.26777778	28.57222222	29.01888889	28.27888889	27.94222222	28.38666667	27.9	28.14666667	28.40222222	27.63666667	28.6	27.53777778	27.80444444	27.33333333	27.28555556	27.31444444	27.30555556	27.28777778	27.44333333	26.76666667	26.84666667	27.23666667	27.15	27.06666667	25.94777778	26.33222222	25.27111111	25.63111111	25	26.02333333	25.78111111	26.66666667	24.97222222	25.57333333	25.81888889	26.13444444	25.63444444
8/11/19 11:40:05	-118.5151007	42.54371046	1233.923955	8/11/19 11:41:04	24.68111111	25.48333333	25.07777778	25.05555556	25.45333333	25.20111111	24.46777778	24.64555556	25.52777778	24.97222222	25.33333333	24.57111111	24.26444444	24.87	24.27666667	24.56333333	24.77333333	23.97	24.91444444	24	24.27333333	23.75666667	23.71111111	23.80777778	23.71888889	23.82888889	23.92444444	23.37111111	23.32666667	23.72555556	23.73	23.71555556	22.92777778	23.10111111	22.40555556	22.08888889	21.73555556	23.11111111	22.13555556	23.54333333	21.66333333	22.28222222	22.48111111	22.77333333	22.27555556
8/11/19 11:40:06	-118.5151377	42.54372104	1233.883173	8/11/19 11:41:05	20.96444444	21.79222222	21.86888889	21.53	21.76333333	21.76333333	20.95	21.24666667	22.07555556	21.64555556	22.09111111	21.28111111	20.85222222	21.53444444	21.09	21.19333333	21.39555556	20.71888889	21.71666667	20.75555556	21.04	20.66111111	20.50444444	20.58444444	20.48888889	20.67888889	20.82	20.09777778	20.18666667	20.53888889	20.47333333	20.50222222	19.54555556	19.85444444	19.25555556	18.71555556	18.34	19.80444444	19.29888889	20.18666667	18.58666667	19.24111111	19.57222222	19.86	19.42
8/11/19 11:40:07	-118.5151747	42.54373178	1233.865913	8/11/19 11:41:06	20.05	20.64555556	20.84333333	20.46666667	21.04555556	20.87	20.02444444	20.40666667	21.22333333	20.78666667	21.21111111	20.35888889	20.08222222	20.69777778	20.31333333	20.45666667	20.68333333	20.01777778	20.98666667	20.08	20.31666667	19.89444444	19.74333333	19.82111111	19.77777778	19.99777778	19.96666667	19.58777778	19.52666667	19.99555556	19.90888889	19.87111111	18.86444444	19.06222222	18.21777778	18.27777778	17.62	19.13555556	18.64111111	19.65222222	18.00222222	18.70222222	19.08333333	19.32555556	18.84333333
8/11/19 11:40:08	-118.5152131	42.54374325	1233.879339	8/11/19 11:41:07	21.46111111	22.31111111	22.12666667	21.8	22.32111111	22.26222222	21.48222222	21.68777778	22.78111111	22.14666667	22.49666667	21.68888889	21.48444444	22.11666667	21.58	21.89666667	22.10777778	21.38444444	22.34111111	21.47777778	21.75333333	21.18333333	21.16666667	21.23777778	21.24333333	21.36444444	21.39777778	20.87888889	20.99555556	21.33333333	21.26	21.24	20.32111111	20.32666667	19.60111111	19.28111111	19.02222222	20.46333333	19.80666667	20.77777778	19.29555556	19.99777778	20.42333333	20.63222222	20.17777778
8/11/19 11:40:09	-118.515252	42.54375472	1233.8849	8/11/19 11:41:08	26.26	27.129	26.809	26.574	26.905	26.837	26.217	26.26	27.167	26.625	27.058	26.316	25.931	26.539	26.167	26.361	26.491	25.712	26.732	25.774	25.945	25.533	25.373	25.551	25.439	25.577	25.611	25.083	25.128	25.499	25.367	25.44	24.435	24.714	23.76	23.681	23.123	24.339	23.962	24.96	23.351	24.014	24.173	24.531	24.068
8/11/19 11:40:10	-118.5152912	42.54376616	1233.897137	8/11/19 11:41:09	26.83	27.28333333	27.18444444	26.96888889	27.31777778	27.31222222	26.45444444	26.69111111	27.51555556	27.05111111	27.49	26.66888889	26.29666667	26.84444444	26.39666667	26.65	26.81333333	26.23555556	27.05222222	26.14444444	26.35666667	25.95666667	25.81666667	25.82666667	25.83666667	25.89111111	25.90777778	25.48111111	25.49111111	25.86444444	25.79555556	25.69333333	24.74333333	24.93888889	24.15333333	24.08111111	23.62444444	24.84	24.14111111	25.36777778	23.8	24.30333333	24.50222222	24.91222222	24.49111111
8/11/19 11:40:11	-118.5153308	42.54377745	1233.907526	8/11/19 11:41:10	22.67444444	23.52333333	23.23	23.10444444	23.50333333	23.33	22.56666667	22.71666667	23.73444444	23.18333333	23.66444444	22.76555556	22.50777778	23.04	22.58111111	22.89666667	23.04	22.42777778	23.29888889	22.30888889	22.62777778	22.16777778	22.18777778	22.28111111	22.14333333	22.18222222	22.36111111	21.76777778	21.93111111	22.22555556	22.15777778	22.25333333	21.24	21.47222222	20.90111111	20.69222222	19.88222222	21.56	20.96888889	22.04	20.33111111	20.91333333	21.02555556	21.4	20.97444444
8/11/19 11:40:12	-118.5153695	42.54378827	1233.919813	8/11/19 11:41:11	22.52777778	23.31444444	23.06777778	23.04888889	23.40222222	23.26	22.44666667	22.63222222	23.58444444	22.97666667	23.42222222	22.65333333	22.34777778	22.88222222	22.45	22.58	22.82	22.13111111	23.11222222	22.20444444	22.48333333	21.96555556	21.96888889	22.10444444	22.01777778	22.05111111	22.13111111	21.67888889	21.64777778	22.24777778	22.08222222	22.04888889	21.26333333	21.30222222	20.86111111	20.79	20.04333333	21.55333333	20.96111111	22.02555556	20.44555556	20.87555556	21.16555556	21.50333333	21.00888889
8/11/19 11:40:13	-118.5154021	42.54379734	1233.932358	8/11/19 11:41:12	21.29555556	21.99888889	21.67777778	21.62333333	21.99333333	21.94888889	21.20222222	21.51777778	22.33444444	21.80222222	22.26777778	21.39666667	21.08111111	21.72555556	21.25333333	21.51333333	21.76444444	20.91555556	21.88888889	21.05555556	21.39333333	20.84444444	20.79555556	20.89333333	20.86777778	20.99111111	21.11666667	20.66333333	20.66333333	21.16888889	21.02111111	20.96888889	20.15666667	20.62555556	19.70111111	19.49444444	19.05111111	20.35444444	19.82444444	20.96888889	19.32333333	20.11	20.16111111	20.63222222	19.99444444
8/11/19 11:40:14	-118.5154139	42.54379789	1234.019	8/11/19 11:41:13	21.06444444	21.96777778	21.67111111	21.68111111	21.98333333	21.98777778	21.08333333	21.32777778	22.23	21.71555556	22.19222222	21.29111111	21.02	21.59888889	21.15666667	21.43	21.54888889	20.84888889	21.79777778	20.88	21.16	20.78333333	20.74111111	20.74333333	20.76333333	20.94	20.94111111	20.43222222	20.55222222	20.93888889	20.84666667	20.88	19.97222222	20.15888889	19.69111111	19.36888889	19.06111111	20.14888889	19.92777778	20.97777778	19.02555556	19.62222222	19.87555556	20.27333333	19.79888889
8/11/19 11:40:15	-118.515422	42.54378809	1234.068847	8/11/19 11:41:14	21.23666667	22.08777778	21.93111111	21.83333333	22.21111111	21.86444444	21.07888889	21.41	22.30333333	21.84444444	22.19555556	21.35111111	21.05111111	21.66666667	21.24666667	21.42666667	21.68222222	20.91666667	21.96111111	20.94555556	21.17666667	20.85666667	20.78777778	20.92444444	20.80111111	21.04333333	21.05555556	20.44888889	20.63222222	21.02555556	20.85111111	20.91111111	19.84333333	20.43333333	19.84333333	19.53444444	19.13666667	20.29888889	19.95111111	20.89222222	19.12	19.73444444	19.88	20.33555556	19.97222222
8/11/19 11:40:16	-118.5154322	42.54377128	1234.092906	8/11/19 11:41:15	22.42777778	23.27	22.95888889	22.92666667	23.11333333	22.98333333	22.18333333	22.36888889	23.33222222	22.79	23.21555556	22.53888889	22.09444444	22.75777778	22.19	22.41333333	22.65333333	21.94777778	22.96555556	21.94666667	22.24333333	21.84888889	21.74	21.83777778	21.81888889	21.96888889	21.95555556	21.51555556	21.58222222	22.05777778	21.94888889	21.97333333	21.03555556	21.31888889	20.45333333	20.46111111	20.33333333	21.20222222	20.82777778	21.80444444	20.10333333	20.95222222	21.05333333	21.33444444	20.87555556
8/11/19 11:40:17	-118.5154449	42.54374827	1234.092248	8/11/19 11:41:16	26.32666667	27.38777778	26.92444444	27.02777778	27.30222222	27.03444444	26.39222222	26.61333333	27.51666667	26.86111111	27.39555556	26.45222222	26.17333333	26.71	26.44333333	26.57	26.76111111	26.02666667	26.99888889	25.99888889	26.32666667	25.86	25.76222222	25.90333333	25.87666667	26.04333333	26.05444444	25.54222222	25.47777778	26	25.87333333	26.05777778	25.03111111	25.44444444	24.57	24.20888889	24.08222222	25.32111111	24.53555556	25.62	23.97444444	24.79	24.87666667	25.13222222	24.75111111
8/11/19 11:40:18	-118.5154552	42.54372864	1234.035297	8/11/19 11:41:17	27.51	28.14555556	28.06444444	27.87	28.15444444	28.10666667	27.22111111	27.38888889	28.39	27.89444444	28.27111111	27.37888889	27.06888889	27.65333333	27.20666667	27.46333333	27.68555556	26.92666667	27.88	26.87	27.19666667	26.71888889	26.66333333	26.71333333	26.66555556	26.88	26.87	26.40111111	26.43333333	26.89666667	26.76	26.84444444	25.81333333	26.25	25.61888889	25.66777778	25.03666667	25.94777778	25.45	26.69111111	24.98111111	25.61333333	25.73666667	26.06444444	25.58111111
8/11/19 11:40:19	-118.5154552	42.54372276	1234.061017	8/11/19 11:41:18	27.84444444	28.95	28.26888889	28.10888889	28.39555556	28.30888889	27.56444444	27.75111111	28.71	28.06444444	28.56	27.67222222	27.24888889	27.91333333	27.43666667	27.70333333	27.87111111	27.13888889	28.13	27.15888889	27.55333333	27.01888889	27.02111111	27.02555556	27.05444444	27.13222222	27.11666667	26.70111111	26.65555556	27.10555556	27.05666667	27.21777778	26.26555556	26.55777778	25.72777778	25.6	25.46666667	26.34888889	25.90555556	27.1	25.36777778	25.85777778	26.07666667	26.34888889	25.82666667
8/11/19 11:40:20	-118.5154479	42.54371937	1234.067142	8/11/19 11:41:19	27.08222222	28.10111111	27.67	27.60666667	28.00666667	27.62666667	26.97888889	27.17111111	28.02666667	27.5	27.91333333	27.14666667	26.83222222	27.37666667	26.87	27.07333333	27.35444444	26.49555556	27.58555556	26.59666667	26.93333333	26.43888889	26.4	26.47888889	26.47333333	26.57777778	26.47	26.20555556	26.14222222	26.63888889	26.66555556	26.59555556	25.48555556	25.96333333	25.19	25.19333333	24.52111111	25.85333333	25.34777778	26.36444444	24.83555556	25.44555556	25.37555556	25.74888889	25.22777778
8/11/19 11:40:21	-118.5154336	42.54371478	1234.061652	8/11/19 11:41:20	26.16222222	27.04555556	26.65333333	26.64111111	26.89777778	26.72555556	25.89555556	26.25555556	27.09555556	26.47111111	26.85	26.01777778	25.73	26.36222222	25.91333333	26.08666667	26.27444444	25.50666667	26.54444444	25.58	25.92333333	25.46333333	25.41333333	25.4	25.47555556	25.48888889	25.49888889	25.12	25.06111111	25.73222222	25.51888889	25.51555556	24.63777778	25.20444444	24.01222222	24.32444444	23.75555556	24.99777778	24.35444444	25.41444444	23.71777778	24.34444444	24.53555556	24.66666667	24.24222222
8/11/19 11:40:22	-118.5154133	42.54370856	1234.054732	8/11/19 11:41:21	25.53222222	26.29666667	26.16111111	25.77333333	26.25111111	26.03111111	25.24111111	25.53111111	26.50333333	25.95333333	26.29444444	25.43	25.14333333	25.68	25.17666667	25.5	25.70666667	24.96777778	25.92666667	24.95222222	25.21333333	24.73333333	24.65777778	24.76222222	24.77777778	24.79666667	24.87555556	24.48888889	24.54777778	24.88888889	24.90444444	24.85333333	23.91777778	24.20333333	23.42222222	23.60555556	22.87666667	24.06888889	23.71222222	24.62222222	23.03777778	23.68666667	23.80222222	24.10444444	23.69333333
8/11/19 11:40:23	-118.5153885	42.54370111	1234.075923	8/11/19 11:41:22	25.01444444	25.85	25.67777778	25.30777778	25.64888889	25.47555556	24.71666667	24.96111111	25.89222222	25.33555556	25.76111111	24.87888889	24.56555556	25.13555556	24.61666667	24.97888889	25.04111111	24.32	25.50555556	24.35666667	24.69	24.27333333	24.16888889	24.17111111	24.32	24.28666667	24.38444444	23.85666667	23.96222222	24.45222222	24.18	24.2	23.50888889	23.81666667	22.94333333	22.84222222	22.37222222	23.48222222	23.07666667	24.19	22.51111111	23.12	23.26333333	23.62888889	23.16444444
8/11/19 11:40:24	-118.5153598	42.54369333	1234.080052	8/11/19 11:41:23	24.17111111	25.06888889	24.99	24.73555556	25.03888889	24.85222222	23.96111111	24.32777778	25.24222222	24.57444444	24.98222222	24.13333333	23.79888889	24.52111111	23.85777778	24.29333333	24.38	23.72666667	24.66444444	23.69444444	24.01666667	23.51222222	23.47777778	23.62555556	23.45555556	23.61888889	23.68777778	23.24111111	23.24222222	23.54555556	23.54222222	23.70666667	22.72555556	23.06	22.09888889	21.93888889	21.72666667	22.83555556	22.36222222	23.46888889	21.75666667	22.24666667	22.36	22.76111111	22.31888889
8/11/19 11:40:25	-118.5153276	42.54368452	1234.06771	8/11/19 11:41:24	21.71888889	22.45444444	22.20888889	21.96333333	22.39777778	22.10111111	21.38666667	21.62111111	22.53444444	21.97777778	22.59111111	21.58111111	21.32777778	21.88222222	21.43	21.71666667	21.92444444	21.18	22.24111111	21.10222222	21.49333333	20.99777778	20.97	21.13888889	21.08	21.22666667	21.27777778	20.77555556	20.82555556	21.2	21.05	21.25333333	20.26	20.39222222	19.89555556	19.55333333	19.17333333	20.54222222	19.90111111	21.00777778	19.21888889	19.90111111	20.29333333	20.50888889	20.09888889
8/11/19 11:40:26	-118.5152936	42.54367515	1234.012513	8/11/19 11:41:25	21.23555556	21.97111111	21.97666667	21.71333333	22.19333333	22.05666667	21.24111111	21.44	22.45666667	21.80888889	22.27333333	21.45777778	21.15777778	21.71777778	21.37666667	21.65	21.85555556	21.07555556	22.10333333	21.11333333	21.5	21.04444444	21.13555556	21.13666667	21.06222222	21.12555556	21.23555556	20.73777778	20.78888889	21.20222222	21.09888889	21.28444444	20.11777778	20.61	19.79444444	19.59444444	19.02333333	20.57444444	19.84	20.93222222	19.54555556	20.16	20.36555556	20.74444444	20.28
8/11/19 11:40:27	-118.5152578	42.54366517	1233.962473	8/11/19 11:41:26	21.65222222	22.57222222	22.46222222	22.45	22.60333333	22.54888889	21.80555556	21.99111111	22.91222222	22.25666667	22.81222222	21.91555556	21.63333333	22.34222222	21.81333333	22.10333333	22.28222222	21.56888889	22.58666667	21.56111111	21.89333333	21.47111111	21.4	21.51	21.37555556	21.51	21.63333333	21.12111111	21.19555556	21.46222222	21.51777778	21.50222222	20.50555556	20.68888889	19.76222222	19.91222222	19.22888889	20.77555556	20.28777778	21.54666667	19.59444444	20.31222222	20.52444444	20.83222222	20.44333333
8/11/19 11:40:28	-118.5152195	42.54365463	1233.937306	8/11/19 11:41:27	22.926	23.771	23.553	23.559	23.753	23.667	22.769	22.956	23.893	23.381	23.653	22.828	22.511	23.004	22.54	22.836	23.082	22.306	23.302	22.325	22.588	22.151	22.083	22.122	21.954	22.273	22.323	21.775	21.795	22.236	22.047	22.156	21.193	21.718	20.522	20.682	20.219	21.362	21.015	21.963	20.164	20.759	20.913	21.277	20.712
8/11/19 11:40:29	-118.5151793	42.54364359	1233.941806	8/11/19 11:41:28	22.78555556	23.66444444	23.42888889	23.14888889	23.40111111	23.18888889	22.38777778	22.47888889	23.53444444	22.78888889	23.33888889	22.40333333	22.10777778	22.69222222	22.20333333	22.43333333	22.64111111	21.92444444	22.85333333	21.76555556	22.08333333	21.60555556	21.58111111	21.62333333	21.58555556	21.63888889	21.65888889	21.12333333	21.20222222	21.59777778	21.48333333	21.62666667	20.54222222	21.44111111	20.37222222	20.37222222	19.96888889	21.28333333	20.85888889	21.65888889	19.89333333	20.47111111	20.39	20.75555556	20.37111111
8/11/19 11:40:30	-118.5151404	42.54363277	1233.977519	8/11/19 11:41:29	24.11888889	24.63	24.49222222	24.38777778	24.46111111	24.50888889	23.45888889	23.68777778	24.66333333	23.95777778	24.38222222	23.51777778	23.25444444	23.86888889	23.32222222	23.61666667	23.70222222	22.96333333	23.94888889	22.86	23.12777778	22.74222222	22.69666667	22.72222222	22.68111111	22.78333333	22.8	22.19333333	22.23444444	22.75777778	22.75555556	22.82666667	21.81444444	22.05444444	21.62333333	21.62777778	20.82888889	22.38	21.60444444	22.90777778	20.92888889	21.45	21.41	21.73888889	21.26555556
8/11/19 11:40:31	-118.5151038	42.54362271	1234.013181	8/11/19 11:41:30	24.09666667	24.82333333	24.61555556	24.50111111	24.85333333	24.64111111	23.71444444	23.92888889	24.83222222	24.21777778	24.55555556	23.84333333	23.42666667	23.95555556	23.42666667	23.75666667	23.94333333	23.11111111	24.12777778	23.03444444	23.35111111	22.88555556	22.73444444	22.85222222	22.86	22.87888889	22.94666667	22.39333333	22.39222222	22.87	22.78666667	22.82666667	21.93	22.65	21.64222222	21.74555556	21.46555556	22.29111111	21.69666667	22.92888889	20.99777778	21.49444444	21.62	21.85444444	21.34
8/11/19 11:40:32	-118.5150701	42.54361381	1233.9984	8/11/19 11:41:31	26.69666667	27.33	27.10888889	26.98777778	27.17777778	26.97333333	26.05333333	26.21222222	27.12555556	26.61222222	26.96444444	26.15888889	25.72222222	26.37666667	25.89666667	26.13111111	26.36	25.61555556	26.55444444	25.47444444	25.78	25.34666667	25.26333333	25.25333333	25.29	25.42111111	25.40666667	24.77111111	24.80444444	25.26777778	25.22777778	25.16	24.13111111	24.48555556	23.87888889	23.92666667	23.38222222	24.48111111	23.53888889	24.88111111	22.93888889	23.62	23.45333333	23.73	23.15777778
8/11/19 11:40:33	-118.5150378	42.54360544	1233.999019	8/11/19 11:41:32	28.93333333	29.64	29.01777778	28.87666667	29.08222222	28.82888889	27.91444444	28.12222222	29.03	28.50888889	29.02222222	28.13444444	27.75888889	28.54888889	28.04666667	28.30333333	28.53222222	27.75666667	28.84111111	27.85333333	28.10333333	27.81	27.56666667	27.66666667	27.63	27.72333333	27.77333333	27.15777778	27.2	27.50222222	27.40777778	27.37333333	26.46222222	26.72666667	26.05555556	25.77555556	25.35444444	26.09444444	25.30222222	26.30333333	24.27555556	24.85333333	24.73111111	24.92777778	24.53444444
8/11/19 11:40:34	-118.515009	42.54359748	1234.02084	8/11/19 11:41:33	29.11888889	29.69888889	29.09333333	28.70222222	28.67888889	28.46444444	27.54222222	27.77888889	28.82888889	28.28	28.73888889	27.96444444	27.81	28.57	28.20555556	28.65333333	28.85111111	28.23222222	29.25222222	28.35111111	28.72222222	28.34333333	28.30666667	28.42666667	28.18333333	28.41444444	28.38777778	27.93666667	27.76111111	28.19777778	28.01	28.03555556	26.85888889	27.16111111	25.84111111	26.12666667	24.99222222	25.80444444	24.82333333	25.5	23.13222222	23.50111111	23.50222222	23.85111111	23.36
8/11/19 11:40:35	-118.5149769	42.54358888	1234.042224	8/11/19 11:41:34	28.03111111	28.73222222	28.26777778	27.92888889	27.84888889	27.77888889	26.90222222	26.90333333	28.04111111	27.41666667	27.99666667	27.26888889	26.97555556	27.68777778	27.21333333	27.65666667	27.91222222	27.29444444	28.28777778	27.4	27.64666667	27.22777778	27.26555556	27.42666667	27.29333333	27.36555556	27.36	26.92111111	26.88555556	27.16111111	27.08222222	27.16888889	25.90333333	26.20222222	25.30222222	25.13222222	24.55111111	25.15777778	24.05444444	24.88222222	22.82	23.23222222	23.31222222	23.48222222	22.99111111
8/11/19 11:40:36	-118.5149412	42.5435796	1234.05622	8/11/19 11:41:35	28.91222222	29.49777778	29.07111111	28.81444444	28.98777778	28.9	27.97222222	28.08888889	29.21555556	28.41555556	28.99222222	28.00888889	27.69	28.39333333	27.75666667	28.05333333	28.29444444	27.62666667	28.64555556	27.66	27.97555556	27.50555556	27.46	27.52444444	27.40333333	27.49222222	27.55555556	27.02888889	26.99555556	27.45888889	27.25888889	27.33777778	26.34888889	26.66333333	25.97333333	26.05888889	25.28111111	26.51444444	25.72444444	26.76	24.79777778	25.21666667	25.30111111	25.43555556	24.84444444
8/11/19 11:40:37	-118.5149079	42.54357076	1234.060271	8/11/19 11:41:36	29.19888889	29.94444444	29.51666667	29.01111111	29.30555556	29.14222222	28.28888889	28.39555556	29.41111111	28.85444444	29.25	28.35777778	28.07777778	28.71555556	28.23444444	28.49	28.81666667	27.96888889	28.97333333	27.96	28.31333333	27.75888889	27.78	27.90444444	27.79111111	27.87555556	27.97444444	27.32333333	27.36555556	27.77333333	27.56777778	27.68888889	26.83555556	27.08	26.33	26.26111111	25.59888889	26.65777778	25.97666667	26.95555556	25.26777778	25.59333333	25.75333333	25.84111111	25.43111111
8/11/19 11:40:38	-118.514874	42.54356181	1233.986829	8/11/19 11:41:37	28.30333333	28.75333333	28.71666667	28.35555556	28.60777778	28.38111111	27.47888889	27.71333333	28.77111111	28.04222222	28.56333333	27.65555556	27.38888889	27.91333333	27.37333333	27.67	27.89111111	27.15888889	28.08555556	27.11777778	27.4	26.91666667	26.86555556	26.9	26.83777778	26.94444444	27.03555556	26.39777778	26.45555556	26.87333333	26.82777778	26.72888889	25.75444444	26.27555556	25.77	25.52333333	24.98111111	26.05888889	25.34666667	26.43777778	24.57777778	24.87333333	25.05111111	25.25666667	24.80444444
8/11/19 11:40:39	-118.5148388	42.54355252	1233.852287	8/11/19 11:41:38	29.88777778	30.70333333	30.62111111	30.46888889	30.55111111	30.36666667	29.51111111	29.63111111	30.69333333	30.02555556	30.41222222	29.64	29.18555556	29.82777778	29.34666667	29.53666667	29.75	28.92	29.94555556	28.86555556	29.10888889	28.68888889	28.54888889	28.60777778	28.52777778	28.53	28.63777778	28.10555556	28.24444444	28.62	28.53222222	28.58666667	27.51111111	27.92	27.48777778	27.09111111	26.50666667	27.65	27.11222222	28.33333333	26.56888889	27.18555556	27.31555556	27.50333333	27.04333333
8/11/19 11:40:40	-118.5148018	42.543542	1233.750013	8/11/19 11:41:39	32.16333333	33.23666667	32.90333333	32.57666667	32.71666667	32.65777778	31.76333333	32.01444444	32.99444444	32.30888889	32.83777778	32.06333333	31.68555556	32.33555556	31.87666667	32	32.21666667	31.50111111	32.26666667	31.45444444	31.56333333	31.15333333	30.94222222	31.04	30.95666667	30.96777778	31.13666667	30.53444444	30.55	30.97111111	30.97666667	30.86222222	29.74555556	30.08666667	29.42	29.54444444	28.99333333	30.10111111	29.73777778	30.81888889	29.01777778	29.50444444	29.61222222	29.91	29.40777778
8/11/19 11:40:41	-118.5147626	42.54353043	1233.724442	8/11/19 11:41:40	32.30444444	33.03666667	32.86333333	32.84777778	32.82555556	32.80555556	31.82888889	32.04444444	33.07888889	32.38111111	32.89222222	32.15	31.75888889	32.33	31.80666667	32.17666667	32.16222222	31.45222222	32.38222222	31.62222222	31.70666667	31.33777778	30.99222222	31.05888889	31.01	31.16555556	31.11666667	30.78333333	30.68555556	31.05444444	30.89777778	31.07111111	29.95222222	30.26222222	29.55222222	29.36777778	28.87222222	30.24777778	29.72111111	30.88333333	29.02444444	29.56111111	29.60888889	30.03555556	29.4
8/11/19 11:40:42	-118.5147214	42.54351846	1233.843687	8/11/19 11:41:41	30.88888889	31.55	31.41888889	31.22888889	31.51111111	31.34222222	30.37444444	30.62	31.52777778	30.99666667	31.48666667	30.54222222	30.35888889	30.92222222	30.47	30.73666667	30.80666667	30.08777778	31.03333333	30.12777778	30.34333333	29.83666667	29.74555556	29.77	29.65555556	29.87555556	29.81888889	29.27111111	29.24777778	29.75333333	29.65888889	29.64888889	28.58555556	28.89222222	28.00777778	28.13222222	27.32	28.81444444	27.93555556	29.29777778	27.50333333	28.15444444	28.36	28.70666667	28.20888889
8/11/19 11:40:43	-118.5146807	42.54350713	1233.999823	8/11/19 11:41:42	26.57	27.44666667	27.12333333	27.18444444	27.31777778	27.10666667	26.29777778	26.45333333	27.52777778	26.86444444	27.27	26.45444444	26.13777778	26.74888889	26.24111111	26.45777778	26.68888889	25.95777778	26.97	25.90666667	26.23888889	25.76444444	25.59333333	25.71888889	25.67888889	25.89555556	25.82	25.32222222	25.39666667	25.83222222	25.76666667	25.84888889	24.79111111	25.06777778	24.39666667	24.59666667	23.91555556	24.91555556	24.47	25.81	24.02444444	24.52666667	24.60888889	24.91555556	24.50444444
8/11/19 11:40:44	-118.5146435	42.54349703	1234.087043	8/11/19 11:41:43	27.299	28.012	27.915	27.81	28.02	27.818	26.847	27.119	28.127	27.508	27.911	27.103	26.678	27.328	26.945	27.125	27.371	26.59	27.525	26.552	26.855	26.451	26.404	26.522	26.406	26.48	26.525	26.002	26.083	26.423	26.407	26.392	25.416	25.627	24.859	24.97	24.503	25.63	24.922	26.334	24.636	25.013	25.265	25.497	24.975
8/11/19 11:40:45	-118.5146096	42.54348737	1234.084052	8/11/19 11:41:44	24.22777778	25.20222222	25.16777778	24.96777778	25.15222222	24.91555556	24.24777778	24.49333333	25.51111111	24.89888889	25.42	24.47333333	24.15111111	24.84222222	24.38444444	24.65888889	24.74111111	24.02888889	25.06666667	23.98333333	24.38555556	23.95555556	23.85555556	23.95333333	23.96777778	24.02777778	24.04555556	23.63555556	23.59666667	24.03	23.89666667	24.11555556	22.90444444	23.27666667	22.55777778	22.37666667	21.61222222	23.05444444	22.53555556	23.49888889	21.88888889	22.55222222	22.82	23.10777778	22.65111111
8/11/19 11:40:46	-118.514577	42.54347824	1234.032645	8/11/19 11:41:45	21.98444444	22.75555556	22.57666667	22.40555556	22.74888889	22.74333333	21.86333333	22.10777778	23.19888889	22.51888889	23.04555556	22.18333333	21.94111111	22.43111111	21.99	22.27666667	22.58777778	21.79444444	22.81666667	21.76666667	22.12	21.72	21.63	21.72555556	21.57666667	21.80888889	21.86222222	21.26888889	21.35666667	21.75	21.65	21.70222222	20.71	20.83666667	19.88333333	19.81444444	19.50111111	20.87777778	20.42666667	21.56777778	19.80444444	20.49	20.56888889	20.98555556	20.49666667
8/11/19 11:40:47	-118.5145444	42.54346918	1233.980145	8/11/19 11:41:46	21.71111111	22.29666667	22.33111111	22.19222222	22.56555556	22.37444444	21.55777778	21.85333333	22.92888889	22.24333333	22.77222222	21.82333333	21.52333333	22.15	21.65	21.92333333	22.23555556	21.45888889	22.47444444	21.35444444	21.83333333	21.26666667	21.29888889	21.41777778	21.30777778	21.51222222	21.56777778	20.98777778	21.09333333	21.48888889	21.34333333	21.48444444	20.22888889	20.55222222	19.90444444	19.72111111	19.15444444	20.52666667	20.00555556	21.12777778	19.46555556	20.15555556	20.4	20.72222222	20.21333333
8/11/19 11:40:48	-118.5145126	42.54346028	1233.930597	8/11/19 11:41:47	20.59333333	21.52555556	21.46555556	21.41666667	21.56666667	21.66444444	20.72	20.85888889	21.94222222	21.37	21.79444444	20.92444444	20.60888889	21.28222222	20.84333333	21.19666667	21.38555556	20.54	21.60666667	20.58777778	20.88333333	20.44666667	20.30777778	20.43555556	20.42888889	20.54444444	20.66777778	20.10777778	20.13444444	20.44111111	20.54666667	20.47111111	19.39222222	19.79555556	18.61333333	18.69555556	18.20888889	19.60444444	19.01666667	20.23333333	18.45444444	19.23111111	19.33777778	19.80444444	19.27333333
8/11/19 11:40:49	-118.5144803	42.54345059	1233.905406	8/11/19 11:41:48	21.42111111	22.51888889	22.13555556	22.22333333	22.50555556	22.43666667	21.48222222	21.75	22.86333333	22.29	22.74111111	21.84	21.49111111	22.15	21.74222222	21.91333333	22.31777778	21.49222222	22.43666667	21.43	21.86111111	21.38888889	21.37	21.38888889	21.36444444	21.67111111	21.56444444	21.08	21.06777778	21.49888889	21.38	21.41777778	20.34555556	20.65	19.43666667	19.65	19.18111111	20.74777778	19.76	21.16111111	19.56	20.20666667	20.41111111	20.74777778	20.37222222
8/11/19 11:40:50	-118.5144485	42.54344125	1233.910306	8/11/19 11:41:49	26.40666667	27.24666667	27.28777778	27.27111111	27.50444444	27.46777778	26.52555556	26.88111111	27.89444444	27.34222222	27.83888889	26.97666667	26.63	27.32	26.88666667	27.19666667	27.34	26.58	27.59888889	26.59888889	26.98333333	26.55666667	26.47333333	26.59111111	26.64	26.68222222	26.71333333	26.21111111	26.22444444	26.64111111	26.63222222	26.55555556	25.48111111	25.23777778	24.29555556	24.78333333	24.05444444	25.74777778	24.69777778	26.19	24.79111111	25.68555556	26.00777778	26.22222222	25.76333333
8/11/19 11:40:51	-118.5144172	42.54343238	1233.917555	8/11/19 11:41:50	29.38555556	30.20555556	30.18444444	30.24333333	30.40777778	30.43777778	29.39666667	29.69888889	30.87444444	30.16777778	30.68222222	29.89888889	29.47444444	30.21777778	29.78444444	30.09666667	30.35888889	29.56	30.56555556	29.53777778	29.99111111	29.38555556	29.34333333	29.35111111	29.37111111	29.62222222	29.57444444	29.03555556	29.16888889	29.60666667	29.46666667	29.4	28.20444444	28.04	27.12111111	27.28555556	26.71111111	28.75222222	27.86444444	29.06888889	27.68	28.52777778	28.68777778	29.23333333	28.66555556
8/11/19 11:40:52	-118.5143869	42.54342409	1233.9077	8/11/19 11:41:51	30.69	31.84	31.58222222	31.62666667	31.86444444	31.79555556	31.03	31.31444444	32.29888889	31.75555556	32.22666667	31.45888889	31.17333333	31.81555556	31.30666667	31.66	31.91666667	31.11444444	32.07666667	31.15222222	31.48777778	30.99222222	30.92555556	31.01888889	31.03777778	31.00111111	31.13555556	30.64222222	30.63333333	31.12222222	31.11777778	31.07555556	29.85888889	29.67555556	28.47333333	28.71666667	28.16	30.11	29.24222222	30.56666667	29.3	30.10555556	30.31333333	30.91111111	30.21555556
8/11/19 11:40:53	-118.5143561	42.54341524	1233.921394	8/11/19 11:41:52	20.84222222	21.94666667	21.69666667	21.58777778	21.92777778	21.90111111	20.98	21.36222222	22.28666667	21.73555556	22.16888889	21.34	21.01777778	21.70888889	21.16555556	21.50222222	21.77222222	21.01888889	22.05666667	21.02222222	21.37111111	20.96111111	20.85	21.08666667	21.02777778	21.16333333	21.34333333	20.76444444	20.76888889	21.25888889	21.11888889	21.17333333	20.01777778	20.53777778	19.47777778	19.33222222	18.99444444	20.23777778	19.95777778	20.83888889	19.27777778	20.08888889	20.32333333	20.68555556	20.21222222
8/11/19 11:40:54	-118.5143249	42.54340572	1233.917268	8/11/19 11:41:53	23.88777778	24.49666667	24.65666667	24.36222222	24.80555556	24.62777778	23.77444444	24.12555556	25.32444444	24.57444444	24.96555556	24.11	23.78111111	24.45555556	23.97	24.22888889	24.47666667	23.74777778	24.87333333	23.66888889	24.08888889	23.70666667	23.71888889	23.82333333	23.76	23.88888889	23.84	23.47555556	23.39666667	23.93777778	23.86666667	23.97333333	22.77777778	22.71222222	21.76555556	22.19333333	21.54888889	23.30333333	22.48888889	23.99111111	22.22888889	23.01444444	23.20444444	23.71111111	23.02444444
8/11/19 11:40:55	-118.514294	42.54339711	1233.898371	8/11/19 11:41:54	28.65111111	29.40111111	29.50888889	29.4	29.72	29.50888889	28.74333333	28.86666667	29.87111111	29.29333333	29.87666667	28.93666667	28.69222222	29.35555556	28.88	29.15333333	29.37111111	28.6	29.64555556	28.64111111	29.12222222	28.50444444	28.51555556	28.69777778	28.56777778	28.82444444	28.96888889	28.34	28.4	28.86111111	28.68444444	28.8	27.68444444	27.64444444	26.74555556	26.99333333	26.16111111	27.97444444	27.44777778	28.62222222	27.14777778	28.02222222	28.17555556	28.61444444	28.17444444
8/11/19 11:40:56	-118.5142632	42.54338813	1233.921261	8/11/19 11:41:55	23.26	24.16444444	23.91333333	23.93333333	24.07111111	24.06888889	23.27666667	23.49888889	24.44666667	23.97	24.38888889	23.55222222	23.27444444	23.84111111	23.48777778	23.76444444	24.04888889	23.23555556	24.38	23.24333333	23.69777778	23.20666667	23.15333333	23.30111111	23.31222222	23.46333333	23.52444444	23.00666667	23.12	23.50444444	23.44777778	23.44888889	22.39777778	22.57666667	21.73333333	21.78444444	21.26888889	22.69666667	22.18888889	23.35444444	21.75222222	22.45111111	22.69	23.05333333	22.60888889
8/11/19 11:40:57	-118.5142334	42.54337964	1233.98908	8/11/19 11:41:56	22.73333333	23.50222222	23.44888889	23.52555556	23.84888889	23.72666667	22.75444444	23.08888889	24.11111111	23.52111111	23.99888889	23.15888889	22.84333333	23.53777778	23.01	23.40333333	23.67666667	22.90111111	23.93888889	22.97222222	23.27	22.85111111	22.83222222	22.88444444	22.91111111	22.96555556	23.08222222	22.58777778	22.63888889	23.01333333	23.05	23.03555556	21.91	22.13444444	21.12444444	21.35666667	20.27777778	22.30555556	21.57111111	22.96555556	21.06666667	22.10111111	22.29444444	22.54333333	22.22666667
8/11/19 11:40:58	-118.5142031	42.54337106	1234.0195	8/11/19 11:41:57	22.57777778	23.81333333	23.59888889	23.36777778	23.64111111	23.80111111	22.76222222	22.95666667	24.22111111	23.53777778	23.95666667	23.15666667	22.86555556	23.49555556	23.07222222	23.41555556	23.58777778	22.82222222	23.87888889	22.84777778	23.14888889	22.78888889	22.68777778	22.84555556	22.78777778	23.00222222	23.10666667	22.43333333	22.48222222	22.94222222	22.85333333	22.97777778	21.90111111	22.03666667	21.25555556	21.11222222	20.42777778	22.26333333	21.63444444	22.86777778	21.23444444	21.95333333	22.31111111	22.61111111	22.12777778
8/11/19 11:40:59	-118.5141728	42.54336261	1233.985387	8/11/19 11:41:58	24.35555556	25.31444444	25.17333333	25.14333333	25.53	25.37	24.51777778	24.76333333	25.86444444	25.28666667	25.76111111	24.88222222	24.65	25.13222222	24.76111111	25.04	25.29111111	24.60444444	25.53111111	24.63111111	24.86888889	24.45333333	24.60333333	24.58333333	24.52222222	24.77333333	24.85444444	24.27222222	24.39666667	24.77777778	24.76	24.70666667	23.57222222	23.64	22.79222222	22.73888889	22.30555556	24.17222222	23.49111111	24.57	23.08888889	23.67444444	24.18111111	24.46444444	23.96555556
8/11/19 11:41:00	-118.5141462	42.54335531	1233.955125	8/11/19 11:41:59	29.26	30.03333333	30.00666667	29.91	30.22666667	30.29111111	29.19666667	29.49333333	30.68222222	30.06333333	30.55111111	29.75666667	29.39222222	30.05444444	29.50555556	29.90666667	30.18111111	29.41222222	30.34333333	29.43666667	29.66555556	29.31222222	29.07666667	29.21333333	29.18777778	29.28111111	29.31555556	28.89	28.83666667	29.39444444	29.26333333	29.24444444	27.67555556	27.65222222	27	27.23888889	26.53333333	28.64333333	27.28333333	29.03111111	27.64333333	28.29666667	28.64222222	28.94111111	28.45333333
8/11/19 11:41:01	-118.5141193	42.54334805	1233.941958	8/11/19 11:42:00	38.906	39.745	39.515	39.508	39.759	39.851	39.159	39.307	40.552	39.806	40.229	39.461	39.054	39.659	39.145	39.423	39.596	38.869	39.814	38.761	39.15	38.591	38.541	38.604	38.638	38.774	38.877	38.298	38.271	38.669	38.487	38.288	37.111	37.106	35.827	36.362	35.42	37.557	36.741	38.105	36.886	37.419	37.775	38.212	37.76
8/11/19 11:41:02	-118.5140866	42.54333867	1233.985786	8/11/19 11:42:01	40.00777778	40.99333333	40.77555556	40.87444444	41.05555556	41.19333333	40.3	40.66333333	41.69222222	40.92888889	41.41333333	40.53888889	40.21	40.79555556	40.27	40.65	40.78	40.05777778	40.99111111	39.90333333	40.24222222	39.78111111	39.69	39.67888889	39.76666667	39.80555556	39.88555556	39.44777778	39.33444444	39.79333333	39.61777778	39.51111111	38.21444444	38.05444444	37.06333333	37.52111111	36.91444444	38.82222222	37.76	39.27666667	37.97444444	38.65555556	38.89	39.43	39.07222222
8/11/19 11:41:03	-118.514053	42.54332925	1234.068477	8/11/19 11:42:02	36.54777778	37.35666667	37.30666667	37.21	37.56111111	37.55555556	36.55111111	36.91777778	37.94666667	37.54333333	37.97777778	37.05333333	36.97666667	37.47555556	36.91666667	37.27333333	37.53111111	36.70888889	37.68888889	36.69888889	37.13666667	36.58777778	36.50111111	36.69444444	36.78333333	36.62666667	36.81111111	36.25333333	36.14666667	36.47111111	36.41	36.44	34.96555556	35.10666667	33.98444444	34.08333333	33.64111111	35.61333333	34.53222222	36.17555556	34.71111111	35.56222222	35.83555556	36.25333333	35.80555556
8/11/19 11:41:04	-118.514022	42.54332038	1234.092442	8/11/19 11:42:03	35.38555556	36.57333333	36.36	36.46222222	36.51333333	36.56222222	35.59	35.83777778	37.13222222	36.61888889	37.05888889	36.10222222	35.76444444	36.56555556	36.00444444	36.29666667	36.58555556	35.80555556	36.80333333	35.79	36.17333333	35.77	35.73444444	35.76666667	35.79666667	35.66555556	35.80111111	35.25222222	35.29666667	35.61777778	35.51777778	35.43111111	34.34	34.34	32.83333333	33.31444444	32.61222222	34.61444444	33.70111111	35.40777778	33.84111111	34.59222222	34.84222222	35.27666667	34.85111111
8/11/19 11:41:05	-118.5139911	42.54331214	1234.076303	8/11/19 11:42:04	32.72666667	33.86	33.52444444	33.57333333	33.67333333	33.82888889	32.92555556	33.18111111	34.31666667	33.71666667	34.28222222	33.56	33.20111111	33.81333333	33.33777778	33.69666667	33.95666667	33.25	34.10222222	33.12111111	33.55222222	33.04222222	33.09888889	33.02222222	33.02333333	33.21222222	33.07777778	32.61333333	32.65222222	33.01888889	33.03555556	32.91111111	31.67	31.47111111	30.39444444	30.59666667	29.95666667	31.91555556	31.06777778	32.42	31.26111111	32.06888889	32.36777778	32.91555556	32.26111111
8/11/19 11:41:06	-118.5139626	42.54330447	1234.030873	8/11/19 11:42:05	32.38555556	33.32444444	33.15666667	33.04222222	33.44333333	33.46333333	32.50777778	32.77222222	33.90111111	33.37555556	33.94222222	33.11444444	32.77777778	33.51444444	32.99888889	33.36	33.67222222	32.84777778	33.77111111	32.83777778	33.12	32.71333333	32.55333333	32.56333333	32.53888889	32.63111111	32.67777778	32.18222222	32.15555556	32.60777778	32.53555556	32.56888889	31.2	31.1	30.04	30.30444444	29.55444444	31.57555556	30.67444444	32.21777778	30.69666667	31.64222222	32.03222222	32.39333333	31.98666667
8/11/19 11:41:07	-118.5139356	42.54329688	1233.994684	8/11/19 11:42:06	31.28111111	32.28444444	32.21444444	32.11111111	32.42222222	32.31777778	31.56111111	31.83	32.81	32.31222222	32.97555556	32.13555556	31.72222222	32.38888889	32.01666667	32.34111111	32.61777778	31.92111111	32.71777778	31.77444444	32.09333333	31.74	31.50666667	31.69777778	31.62444444	31.65777778	31.78	31.22333333	31.17666667	31.67	31.66111111	31.61777778	30.22777778	30.34222222	29.14333333	29.19444444	28.58222222	30.68111111	29.75111111	31.14333333	29.73444444	30.69555556	31.02666667	31.60888889	30.97111111
8/11/19 11:41:08	-118.5139079	42.54328916	1234.010806	8/11/19 11:42:07	28.50555556	29.49222222	29.35111111	29.05333333	29.46444444	29.54	28.58888889	28.84	29.98444444	29.44666667	29.98888889	29.11222222	28.89333333	29.50333333	29.05111111	29.36666667	29.50555556	28.88111111	29.89444444	28.93444444	29.14222222	28.71444444	28.69666667	28.87222222	28.79777778	28.92	28.95111111	28.62333333	28.53111111	29.05555556	28.83555556	28.84	27.58333333	27.58666667	26.08444444	26.54555556	25.90888889	27.96111111	26.94	28.41555556	26.93444444	27.87	28.25	28.72333333	28.27111111
8/11/19 11:41:09	-118.5138799	42.54328163	1234.054613	8/11/19 11:42:08	30.44444444	31.37111111	31.34222222	31.16777778	31.50444444	31.53555556	30.56555556	30.84555556	32.05555556	31.31444444	31.93777778	31.14444444	30.77666667	31.53888889	31.01666667	31.45555556	31.65	30.97222222	31.86888889	30.94666667	31.25666667	30.76333333	30.64	30.68888889	30.68222222	30.79777778	30.87111111	30.38444444	30.29333333	30.77777778	30.68	30.66222222	29.33333333	29.29	28.10666667	28.33777778	27.68444444	29.76555556	28.84333333	30.28666667	28.91777778	29.80222222	30.27888889	30.65777778	30.17777778
8/11/19 11:41:10	-118.513854	42.54327442	1234.053237	8/11/19 11:42:09	27.61444444	28.68222222	28.41222222	28.41333333	28.66666667	28.63222222	27.83333333	28.05555556	29.23666667	28.56555556	29.08666667	28.33	28.01333333	28.79444444	28.23444444	28.57	28.74777778	27.94333333	29.16555556	28.01666667	28.40111111	27.93333333	27.96333333	27.95222222	28.06	28.17666667	28.22444444	27.74777778	27.79888889	28.23111111	28.11777778	28.20444444	26.93222222	26.80666667	25.73111111	25.87444444	25.18777778	26.97444444	26.35888889	27.62555556	26.22222222	27.06666667	27.45111111	27.96444444	27.51222222
8/11/19 11:41:11	-118.5138284	42.54326694	1234.025474	8/11/19 11:42:10	26.60666667	27.51444444	27.33555556	27.33555556	27.73	27.74666667	26.76555556	27.05444444	28.15	27.61444444	28.12777778	27.29777778	26.92555556	27.71	27.26	27.55	27.79444444	27.03333333	28.13444444	27.09222222	27.46	26.98222222	26.89888889	27.16333333	27.00222222	27.10888889	27.20666667	26.66888889	26.75777778	27.18	27.20666667	27.18222222	25.82333333	26.11444444	24.60111111	25.07444444	24.44	26.21666667	25.24666667	26.72888889	25.42666667	26.09333333	26.36444444	26.89888889	26.47444444
8/11/19 11:41:12	-118.5138036	42.5432599	1234.006639	8/11/19 11:42:11	24.40555556	25.28222222	25.18111111	24.94888889	25.40555556	25.18777778	24.33222222	24.70222222	25.89555556	25.11444444	25.73777778	24.87777778	24.67888889	25.23	24.84222222	25.19777778	25.34	24.62222222	25.67666667	24.56333333	25.03111111	24.57111111	24.52111111	24.68222222	24.62888889	24.68888889	24.89444444	24.35555556	24.43888889	24.74666667	24.67	24.88	23.63555556	23.90777778	22.34333333	22.61222222	22.15777778	23.75111111	23.46777778	24.39555556	22.76111111	23.65777778	24.01111111	24.39555556	24.00444444
8/11/19 11:41:13	-118.5137793	42.54325352	1233.988635	8/11/19 11:42:12	22.57	23.38111111	23.46222222	23.20555556	23.55444444	23.48777778	22.43444444	22.80555556	24.07777778	23.47777778	23.85888889	23.02444444	22.68777778	23.45	23.03666667	23.18666667	23.55	22.81666667	23.82555556	22.84777778	23.13333333	22.62111111	22.65444444	22.79555556	22.72111111	22.86333333	22.80666667	22.38222222	22.51777778	22.84666667	22.89666667	22.81777778	21.64333333	21.45666667	20.54555556	20.79333333	20.15555556	21.97444444	21.25888889	22.67888889	21.07777778	21.64333333	22.06333333	22.47222222	21.91888889
8/11/19 11:41:14	-118.5137564	42.54324728	1233.972967	8/11/19 11:42:13	23.02222222	23.96222222	24.04222222	23.90333333	24.22666667	24.11777778	23.18777778	23.66888889	24.72	23.99888889	24.59888889	23.81	23.39333333	24.1	23.68333333	23.98	24.26444444	23.42666667	24.54222222	23.48333333	23.86111111	23.44666667	23.38555556	23.50222222	23.52777778	23.59444444	23.68888889	23.27333333	23.21777778	23.66222222	23.53666667	23.60444444	22.40666667	22.65	21.49	21.49222222	21.10888889	22.87555556	21.79777778	23.44444444	21.80777778	22.31777778	22.89444444	23.13555556	22.69777778
8/11/19 11:41:15	-118.5137335	42.54324097	1233.992894	8/11/19 11:42:14	23.21444444	24.22111111	24.27444444	23.94777778	24.36666667	24.19111111	23.38666667	23.61888889	24.80333333	24.18	24.81888889	23.84444444	23.57333333	24.22	23.81	24.15	24.35888889	23.62222222	24.65333333	23.59	23.96666667	23.54666667	23.66222222	23.65333333	23.64555556	23.81777778	23.76222222	23.24555556	23.27111111	23.77444444	23.63111111	23.79111111	22.62444444	22.66555556	21.41888889	21.66777778	21.17444444	22.96444444	22.15111111	23.37	21.89	22.60333333	22.95666667	23.47777778	22.90111111
8/11/19 11:41:16	-118.5137105	42.54323489	1234.023665	8/11/19 11:42:15	23.34111111	24.14666667	23.94666667	24.15555556	24.45	24.31222222	23.39	23.60333333	24.87888889	24.22666667	24.78888889	23.81333333	23.67555556	24.31444444	23.84777778	24.26	24.45555556	23.65444444	24.80444444	23.77333333	24.02333333	23.55444444	23.62444444	23.70111111	23.76444444	23.85888889	23.94777778	23.43	23.44444444	23.89555556	23.72888889	23.89777778	22.49333333	22.88444444	21.51	21.50111111	21.26	22.79222222	22.33222222	23.50555556	21.99666667	22.69222222	23.08555556	23.40222222	23.05
8/11/19 11:41:17	-118.5136878	42.54322875	1233.997748	8/11/19 11:42:16	22.987	24.121	23.834	23.684	24.022	24.085	23.107	23.368	24.576	23.977	24.489	23.666	23.365	24.089	23.534	23.906	24.156	23.439	24.406	23.408	23.834	23.283	23.303	23.429	23.481	23.545	23.621	23.076	23.14	23.733	23.557	23.592	22.341	22.451	21.208	21.427	20.791	22.647	21.644	23.126	21.77	22.318	22.823	23.134	22.561
8/11/19 11:41:18	-118.5136646	42.54322247	1233.960745	8/11/19 11:42:17	24.5225	25.45875	25.48375	25.19125	25.53375	25.65875	24.685	24.97625	26.03625	25.46875	26.04875	25.16375	24.77	25.52375	25.13625	25.37375	25.67875	24.925	26.10875	24.93875	25.37375	24.8675	24.8125	24.93375	24.96	25.09625	25.1875	24.65	24.62125	25.235	25.11125	25.025	23.70625	23.9125	22.39375	22.63375	22.42375	24.27125	23.28125	24.71875	23.2625	24.06125	24.26375	24.90625	24.2225
8/11/19 11:41:19	-118.5136438	42.54321706	1233.96901	8/11/19 11:42:18	23.48	24.696	24.472	24.222	24.66	24.32	23.646	24.044	25.086	24.422	24.921	24.243	23.882	24.5	24.087	24.361	24.665	23.794	24.997	23.988	24.416	23.906	23.727	23.955	23.947	24.096	24.164	23.629	23.704	24.124	24.029	24.024	22.89	22.792	21.986	21.638	21.414	23.119	22.382	23.618	22.159	22.984	23.284	23.725	23.247
8/11/19 11:41:20	-118.5136267	42.54321245	1233.983758	8/11/19 11:42:19	22.22888889	23.39777778	23.27333333	23.13	23.51555556	23.42555556	22.65555556	22.83	24.08111111	23.44111111	23.88444444	23.03444444	22.78222222	23.46111111	22.95333333	23.29	23.57111111	22.82888889	23.91666667	22.88222222	23.24666667	22.70777778	22.74222222	22.80222222	22.73888889	23.00666667	23.11333333	22.51	22.59111111	23.04222222	22.87555556	22.98666667	21.64888889	21.68111111	20.67888889	20.81	20.15666667	22.00111111	20.82777778	22.50333333	21.08444444	21.76	22.10333333	22.52666667	22.04777778
8/11/19 11:41:21	-118.51362	42.54321053	1233.964897	8/11/19 11:42:20	23.35333333	24.41333333	24.16555556	24.19777778	24.47555556	24.43	23.53555556	23.85888889	24.95333333	24.38666667	24.91888889	24.07666667	23.64888889	24.47222222	23.95777778	24.27	24.64111111	23.77222222	24.81222222	23.84888889	24.23	23.78	23.77888889	23.87222222	23.93777778	24.03888889	24.03	23.39777778	23.60888889	24.04777778	24.00888889	23.96444444	22.79	23.06222222	21.68444444	21.78333333	21.30444444	22.92444444	21.97888889	23.48444444	21.85111111	22.93111111	23.14777778	23.63444444	23.15111111
8/11/19 11:41:22	-118.513622	42.54321131	1233.969303	8/11/19 11:42:21	23.45888889	24.41555556	24.34888889	24.17444444	24.66222222	24.54666667	23.77777778	23.92666667	25.07888889	24.43555556	24.94444444	24.26555556	23.82222222	24.51111111	24.12444444	24.45333333	24.75	24.00222222	25.00555556	23.97	24.28	23.84555556	23.77	23.96666667	23.99111111	24.02	24.23333333	23.72222222	23.80777778	24.13	24.11111111	24.15111111	22.71555556	22.87555556	21.81444444	21.80333333	21.28777778	23.17777778	22.24555556	23.41666667	22.10444444	22.92333333	23.32111111	23.64555556	23.31333333
8/11/19 11:41:23	-118.5136236	42.5432141	1233.934423	8/11/19 11:42:22	23.43	24.35444444	24.20111111	24.22	24.49111111	24.41555556	23.62888889	23.90333333	24.96111111	24.52444444	24.97111111	24.10222222	23.83555556	24.42	24.03333333	24.28	24.64444444	23.77111111	24.95444444	23.91777778	24.26666667	23.82333333	23.75444444	23.86333333	23.84888889	24.00777778	24.08555556	23.61333333	23.65	24.11	23.95333333	23.95555556	22.89555556	22.76111111	21.5	21.78333333	21.13666667	23.13777778	22.24555556	23.62222222	22.14333333	22.90333333	23.18333333	23.73333333	23.14111111
8/11/19 11:41:24	-118.5136219	42.54322245	1233.926313	8/11/19 11:42:23	23.52555556	24.62222222	24.55222222	24.46444444	24.81444444	24.76888889	23.97777778	24.15111111	25.24777778	24.72666667	25.31666667	24.52888889	24.16777778	24.85333333	24.41	24.72666667	24.99222222	24.23333333	25.33	24.21444444	24.61333333	24.12555556	24.20888889	24.25333333	24.25222222	24.36111111	24.44111111	23.96	23.92666667	24.52222222	24.48555556	24.29777778	23.16555556	23.25333333	22.34444444	22.16444444	21.72666667	23.58111111	22.70888889	23.96222222	22.32888889	23.31444444	23.63333333	24.03888889	23.55222222
8/11/19 11:41:25	-118.5136179	42.54323497	1233.889371	8/11/19 11:42:24	23.42888889	24.37777778	24.15666667	24.20666667	24.53666667	24.45333333	23.68888889	23.86222222	25.08222222	24.45222222	25.05555556	24.17888889	23.80111111	24.54555556	24.01444444	24.33666667	24.65666667	23.85888889	25.01777778	23.94888889	24.26111111	23.84111111	23.82	23.96777778	23.92444444	24.08666667	24.16666667	23.64777778	23.68888889	24.07888889	23.91666667	23.97333333	23.00222222	22.96444444	21.76333333	22.00777778	21.42666667	23.02	22.27777778	23.59888889	21.98555556	22.88777778	23.31888889	23.81222222	23.20222222
8/11/19 11:41:26	-118.5136129	42.54324911	1233.87949	8/11/19 11:42:25	21.97	23.04777778	22.78222222	22.82222222	23.00444444	22.92888889	22.07333333	22.30111111	23.49	22.81111111	23.38	22.54666667	22.26666667	22.83222222	22.36666667	22.67666667	22.92	22.16666667	23.29555556	22.22222222	22.6	22.04	22.16111111	22.35333333	22.15333333	22.28222222	22.49666667	21.86555556	21.89888889	22.38333333	22.33222222	22.39111111	21.11888889	21.28777778	20.17	20.25333333	19.44555556	21.51222222	20.53888889	21.99555556	20.35111111	21.05222222	21.45111111	21.86222222	21.23333333
8/11/19 11:41:27	-118.5136069	42.5432651	1233.919194	8/11/19 11:42:26	22.85333333	23.93	23.79111111	23.57	23.92	24.05444444	22.94	23.28	24.51888889	23.93555556	24.23888889	23.56444444	23.23555556	23.91666667	23.41777778	23.80555556	23.96111111	23.19222222	24.23444444	23.24666667	23.61666667	23.17	23.16666667	23.22777778	23.35777778	23.23111111	23.45444444	22.89111111	23.03444444	23.36777778	23.32111111	23.33777778	22.16222222	22.36	21.03333333	21.50111111	20.79222222	22.49777778	21.8	23.06555556	21.35	22.28333333	22.49111111	22.87333333	22.46333333
8/11/19 11:41:28	-118.5136001	42.5432815	1233.937197	8/11/19 11:42:27	26.31111111	27.52777778	27.35444444	27.40444444	27.47666667	27.51	26.67222222	26.93666667	28.09777778	27.53777778	28.07222222	27.16777778	26.95222222	27.57333333	27.21	27.51333333	27.71888889	26.96555556	27.99333333	26.92111111	27.30333333	26.9	26.90777778	26.92888889	26.89111111	26.98	27.17333333	26.67666667	26.66333333	27.06444444	26.96777778	26.94666667	25.78777778	26.11555556	24.31666667	24.41444444	23.90666667	25.84555556	25.18666667	26.45555556	24.88555556	25.73555556	26.13111111	26.70666667	26.23
8/11/19 11:41:29	-118.5135928	42.54329877	1233.952903	8/11/19 11:42:28	25.71222222	26.70333333	26.7	26.49222222	27.00333333	26.99222222	26.04222222	26.32111111	27.46111111	26.80444444	27.38222222	26.47555556	26.16	26.89777778	26.45	26.81666667	27.01	26.23777778	27.37444444	26.21111111	26.68	26.12666667	26.14111111	26.25444444	26.21555556	26.32	26.47777778	25.89555556	25.98	26.46333333	26.27555556	26.32444444	25.08888889	24.88222222	24.04222222	24.01333333	23.17666667	25.14222222	24.47777778	25.69555556	24.40222222	25.11222222	25.51222222	25.90555556	25.47666667
8/11/19 11:41:30	-118.513585	42.54331577	1233.944032	8/11/19 11:42:29	23.16333333	24.16777778	23.80555556	23.86555556	24.32777778	24.33777778	23.32888889	23.5	24.79111111	24.19222222	24.64111111	23.81777778	23.43888889	24.14666667	23.70555556	24.02666667	24.25	23.45222222	24.59	23.41333333	23.89555556	23.39111111	23.28222222	23.48444444	23.41222222	23.61777778	23.72777778	23.17111111	23.2	23.64666667	23.48777778	23.49333333	22.31777778	22.46555556	21.47888889	21.31777778	20.77222222	22.51777778	21.86	23.15666667	21.49222222	22.34888889	22.66888889	23.08666667	22.70333333
8/11/19 11:41:31	-118.513577	42.54333251	1233.948568	8/11/19 11:42:30	22.53333333	23.48666667	23.53222222	23.44444444	23.92111111	23.64777778	22.78666667	23.00888889	24.26	23.56222222	24.08222222	23.31555556	22.98111111	23.66333333	23.18	23.46	23.72444444	22.91444444	23.98555556	22.92888889	23.47111111	22.90555556	22.82444444	22.96111111	22.89444444	23.07333333	23.16	22.59888889	22.60111111	23.19111111	22.96555556	23.07111111	21.96888889	22.00555556	21.05222222	21.07333333	20.25777778	22.12444444	21.52444444	22.82333333	20.99666667	21.77555556	22.22222222	22.58444444	22.19777778
8/11/19 11:41:32	-118.513569	42.54334885	1233.969974	8/11/19 11:42:31	22.10444444	23.09111111	22.96333333	22.97	23.19333333	23.17666667	22.42222222	22.58111111	23.75777778	23.19888889	23.60555556	22.84666667	22.48222222	23.19777778	22.67666667	22.97333333	23.23888889	22.41888889	23.60666667	22.45888889	22.83	22.34777778	22.36333333	22.51888889	22.44333333	22.60777778	22.71	22.13111111	22.21444444	22.63333333	22.55333333	22.51111111	21.40222222	21.88222222	20.52333333	20.40222222	19.83777778	21.57333333	20.96	22.14555556	20.30111111	21.13555556	21.51444444	22.03777778	21.49555556
8/11/19 11:41:33	-118.5135611	42.54336484	1233.974227	8/11/19 11:42:32	21.54888889	22.72666667	22.50888889	22.56333333	22.82333333	22.76888889	21.80555556	22.06111111	23.19888889	22.60777778	23.17777778	22.21888889	21.84111111	22.64666667	22.08666667	22.43666667	22.73333333	21.94222222	22.97888889	21.79666667	22.21	21.84	21.78444444	21.95222222	21.91222222	21.97	22.02	21.54555556	21.49555556	22.02666667	21.84444444	22.04444444	20.53666667	20.86777778	19.82444444	19.85444444	19.15666667	20.89888889	20.36555556	21.08111111	19.67111111	20.62777778	20.83	21.24222222	20.84444444
8/11/19 11:41:34	-118.5135532	42.54338096	1233.967045	8/11/19 11:42:33	21.04444444	22.10222222	22.06555556	21.90777778	22.15	22.23333333	21.32111111	21.64222222	22.65666667	22.15222222	22.65777778	21.64	21.30444444	22.00666667	21.51666667	21.84333333	22.11222222	21.21666667	22.30333333	21.27	21.69666667	21.11333333	21.15111111	21.21	21.18222222	21.23888889	21.34222222	20.73444444	20.71222222	21.22222222	21.15111111	21.19111111	20.09333333	20.23888889	19.12333333	19.25111111	18.60222222	20.20333333	19.42333333	20.74666667	19.10111111	19.85111111	20.19111111	20.48222222	20.04
8/11/19 11:41:35	-118.5135453	42.54339696	1233.961206	8/11/19 11:42:34	21.46	22.32	22.558	22.107	22.64	22.491	21.644	21.888	23.037	22.397	22.961	21.953	21.71	22.354	21.859	22.161	22.375	21.582	22.652	21.487	21.886	21.453	21.326	21.46	21.354	21.571	21.784	21.105	21.142	21.547	21.497	21.472	20.21	20.848	19.413	19.405	18.713	20.34	19.879	21.205	19.293	20.035	20.356	20.825	20.273
8/11/19 11:41:36	-118.5135382	42.54341109	1233.985339	8/11/19 11:42:35	21.51222222	22.46	22.41333333	22.33777778	22.56666667	22.56333333	21.78888889	21.90555556	22.96444444	22.31111111	22.87555556	21.96	21.64777778	22.35777778	21.84	22.21333333	22.39666667	21.58888889	22.67333333	21.62777778	21.94666667	21.40444444	21.33333333	21.44666667	21.36444444	21.54333333	21.59666667	20.99444444	21.10444444	21.58222222	21.42111111	21.53333333	20.39444444	20.53666667	19.30555556	19.57444444	18.64111111	20.53333333	19.73777778	21.16666667	19.33222222	20.14555556	20.46333333	20.76222222	20.28555556
8/11/19 11:41:37	-118.5135366	42.54341622	1233.977968	8/11/19 11:42:36	21.43666667	22.63222222	22.50111111	22.24333333	22.61555556	22.54222222	21.70444444	21.85444444	23.09555556	22.41222222	22.96333333	22.06333333	21.75666667	22.44333333	21.85333333	22.15	22.32333333	21.58333333	22.67888889	21.6	21.93333333	21.43333333	21.44111111	21.47555556	21.46666667	21.55333333	21.64	21.08888889	21.17666667	21.54777778	21.64555556	21.56	20.48333333	20.77	19.46666667	19.37	19.10666667	20.54	19.99888889	21.28888889	19.51666667	20.00333333	20.47111111	20.79	20.28111111
8/11/19 11:41:38	-118.5135387	42.54341545	1233.964697	8/11/19 11:42:37	21.34777778	22.11888889	22.25666667	22.27333333	22.51777778	22.61444444	21.61111111	21.85888889	23.08222222	22.35333333	22.87111111	22	21.61888889	22.26666667	21.78	22.15666667	22.32555556	21.55333333	22.66444444	21.53333333	21.97333333	21.39333333	21.33111111	21.44444444	21.36	21.50444444	21.62888889	20.99777778	21.05333333	21.53444444	21.41555556	21.49777778	20.32	20.27222222	19.16222222	19.32	18.64222222	20.65111111	20.15444444	20.97666667	19.25111111	20.02888889	20.41333333	20.79	20.18
8/11/19 11:41:39	-118.5135435	42.54341502	1233.9739	8/11/19 11:42:38	21.22111111	22.48222222	22.07222222	22.09111111	22.42333333	22.35555556	21.47	21.79777778	22.83333333	22.25444444	22.75777778	21.77777778	21.57222222	22.20555556	21.78	22.06666667	22.24666667	21.37666667	22.62111111	21.34666667	21.81666667	21.29666667	21.27444444	21.35444444	21.41777778	21.50555556	21.53444444	20.92	20.93333333	21.51222222	21.31333333	21.45777778	20.19333333	20.37444444	19.18333333	19.50333333	18.95	20.47777778	19.65444444	21.10444444	19.10111111	19.99777778	20.42222222	20.63	20.12
8/11/19 11:41:40	-118.513551	42.54341538	1233.9627	8/11/19 11:42:39	21.03111111	22.35555556	21.84111111	21.86888889	22.14555556	22.17555556	21.26222222	21.52111111	22.64888889	22.08333333	22.59777778	21.68777778	21.28	22.06777778	21.53	21.73666667	22.02	21.18222222	22.31555556	21.17333333	21.65666667	21.07333333	21.07666667	21.21555556	21.15888889	21.31888889	21.43333333	20.73555556	20.86333333	21.36555556	21.13111111	21.26666667	20.14555556	20.20888889	19.16222222	19.28111111	18.45222222	20.14	19.42555556	20.77111111	19.08333333	19.82555556	20.03555556	20.50222222	20.03444444
8/11/19 11:41:41	-118.5135611	42.54341689	1233.926097	8/11/19 11:42:40	20.83666667	21.92555556	21.69	21.59444444	22.08444444	22.06444444	21.01555556	21.24111111	22.41777778	21.76222222	22.27777778	21.42	21.11555556	21.74444444	21.26333333	21.56	21.91444444	21.07777778	22.15666667	21.05333333	21.36	21.03	20.79222222	21.08111111	20.98444444	20.97777778	21.16222222	20.60888889	20.59222222	21.05666667	20.86666667	21	19.75222222	19.99	18.85666667	18.82333333	18.26666667	20.02444444	19.40222222	20.70888889	19.01222222	19.70222222	19.87111111	20.33888889	19.83888889
8/11/19 11:41:42	-118.5135722	42.54341894	1233.859387	8/11/19 11:42:41	20.96888889	22.04333333	21.68333333	21.64888889	22.04666667	21.98888889	21.06222222	21.38333333	22.41333333	21.90666667	22.33555556	21.46555556	21.13555556	21.86222222	21.29333333	21.68	21.94	21.07555556	22.20333333	21.12666667	21.5	21.00888889	20.91	21.12555556	21.02666667	21.10777778	21.23222222	20.63444444	20.7	21.27111111	21.08333333	21.21333333	19.97	20.17444444	18.99	19.04777778	18.32444444	20.20333333	19.73222222	20.78111111	18.77222222	19.76444444	20.09333333	20.45777778	19.91666667
8/11/19 11:41:43	-118.5135838	42.54342138	1233.821533	8/11/19 11:42:42	21.47333333	22.63888889	22.11333333	22.13555556	22.56	22.34888889	21.52222222	21.78444444	22.87	22.26666667	22.85555556	21.97888889	21.63111111	22.25666667	21.76333333	22.03333333	22.45666667	21.55777778	22.69888889	21.56333333	21.94666667	21.42333333	21.40888889	21.61	21.51555556	21.61666667	21.78222222	21.12444444	21.24444444	21.68555556	21.44555556	21.58222222	20.56777778	20.77111111	19.39555556	19.47777778	18.89222222	20.60777778	20.1	21.32555556	19.58333333	20.28777778	20.57777778	20.96777778	20.61111111
8/11/19 11:41:44	-118.5135955	42.54342358	1233.807687	8/11/19 11:42:43	21.91888889	23.24	23.01888889	22.85111111	23.04555556	23	22.29888889	22.38666667	23.51111111	23.01	23.42666667	22.51777778	22.26888889	22.87888889	22.37	22.77333333	23.06666667	22.31555556	23.47333333	22.34111111	22.63	22.24111111	22.21888889	22.31222222	22.31555556	22.45888889	22.53222222	21.91444444	21.99555556	22.50777778	22.52666667	22.52	21.29	21.36777778	20.18888889	20.28666667	19.62222222	21.60111111	20.75555556	22.04	20.24444444	21.10444444	21.44111111	21.96444444	21.40333333
8/11/19 11:41:45	-118.5136071	42.54342545	1233.799474	8/11/19 11:42:44	23.08777778	24.23555556	24.06333333	24.00444444	24.15888889	24.24333333	23.40666667	23.59444444	24.7	24.24111111	24.72333333	23.83444444	23.47888889	24.26777778	23.72666667	24.07666667	24.34333333	23.48666667	24.69444444	23.52444444	23.96222222	23.55333333	23.37444444	23.66888889	23.48555556	23.61777778	23.81111111	23.14444444	23.31888889	23.74222222	23.75333333	23.70222222	22.53555556	22.55444444	21.49888889	21.36444444	21.11888889	22.58666667	21.98666667	23.17222222	21.57	22.48555556	22.74333333	23.25666667	22.69222222
8/11/19 11:41:46	-118.5136186	42.54342749	1233.857342	8/11/19 11:42:45	23.89777778	24.89111111	24.95444444	24.83	25.19777778	25.07111111	24.21555556	24.46777778	25.72666667	25.13111111	25.65111111	24.72	24.48222222	25.19222222	24.62333333	24.96444444	25.29333333	24.42555556	25.61222222	24.41111111	24.76	24.33222222	24.32666667	24.44	24.43666667	24.57444444	24.65222222	23.98777778	24.12888889	24.72666667	24.50666667	24.57777778	23.41444444	23.54333333	22.10111111	22.33888889	21.75555556	23.76555556	22.67555556	24.26777778	22.37888889	23.52666667	23.74333333	24.20666667	23.65222222
8/11/19 11:41:47	-118.5136308	42.54343002	1233.959967	8/11/19 11:42:46	23.17777778	24.17777778	24.01555556	24.07333333	24.56	24.51555556	23.45888889	23.64	24.86	24.36444444	24.87888889	23.91777778	23.69444444	24.38111111	23.84555556	24.17	24.42777778	23.67111111	24.75666667	23.75222222	24.14888889	23.66222222	23.61444444	23.69333333	23.64555556	23.82666667	24.01111111	23.37555556	23.32777778	23.95777778	23.75888889	23.80888889	22.62444444	22.52	21.46	21.34555556	21.09777778	22.89	21.85333333	23.43111111	21.88333333	22.41555556	22.88555556	23.32444444	22.71333333
8/11/19 11:41:48	-118.5136441	42.54343311	1234.038823	8/11/19 11:42:47	21.73333333	22.80222222	22.64555556	22.48888889	22.89333333	22.8	21.87777778	22.11333333	23.43555556	22.78888889	23.24888889	22.44111111	22.08777778	22.86444444	22.28	22.66666667	22.9	22.13777778	23.19555556	22.16888889	22.51333333	21.94888889	22.03777778	22.16222222	22.13777778	22.28555556	22.39222222	21.75	21.75777778	22.33	22.23555556	22.29333333	21.03	21.31222222	19.78444444	19.98222222	19.77111111	21.38222222	20.50555556	21.71333333	20.28222222	20.99222222	21.22222222	21.70222222	21.28333333
8/11/19 11:41:49	-118.5136573	42.54343636	1234.049848	8/11/19 11:42:48	21.00777778	22.14	21.95	21.80555556	22.25888889	22.12333333	21.33777778	21.55555556	22.74333333	22.19555556	22.68777778	21.86	21.54222222	22.22	21.61	22.03666667	22.31222222	21.55333333	22.66111111	21.54222222	21.87333333	21.47	21.36333333	21.60555556	21.48888889	21.61333333	21.71555556	21.17222222	21.26888889	21.66333333	21.56888889	21.68444444	20.55888889	20.66666667	19.47555556	19.52222222	18.9	20.79555556	20.17111111	21.27222222	19.63444444	20.42888889	20.79666667	21.26666667	20.60555556
8/11/19 11:41:50	-118.5136707	42.54343954	1234.046703	8/11/19 11:42:49	20.58555556	21.68555556	21.62888889	21.43	21.83444444	21.74	20.80333333	21.00666667	22.21333333	21.64555556	22.18444444	21.22555556	20.97555556	21.63777778	21.18666667	21.56666667	21.80222222	21.00888889	22.09	20.96333333	21.41333333	20.91	20.93333333	21.12888889	21.03333333	21.14222222	21.24222222	20.68555556	20.80222222	21.20555556	21.13555556	21.15555556	19.86777778	20.16666667	19.15222222	18.93111111	18.59333333	20.20333333	19.59	20.80333333	19.21333333	19.85555556	20.30222222	20.66	20.16333333
8/11/19 11:41:51	-118.5136841	42.54344277	1234.034035	8/11/19 11:42:50	19.91888889	21.02666667	20.83666667	20.81666667	20.98222222	21.01555556	20.22111111	20.54444444	21.48333333	20.95222222	21.62333333	20.70555556	20.34888889	21.03777778	20.57333333	20.92	21.21666667	20.43666667	21.42666667	20.43666667	20.85666667	20.28333333	20.28666667	20.42888889	20.38222222	20.57888889	20.56	20.05777778	20.25333333	20.63888889	20.45333333	20.63555556	19.24888889	19.57777778	18.53222222	18.49222222	18.02333333	19.71333333	18.86888889	20.17111111	18.37333333	19.41888889	19.64444444	20.18444444	19.51555556
8/11/19 11:41:52	-118.5136978	42.54344619	1234.036343	8/11/19 11:42:51	19.32555556	20.61555556	20.44888889	20.39222222	20.81	20.74111111	19.82111111	20.12888889	21.31333333	20.77	21.28777778	20.40777778	20.14	20.82	20.31	20.6	20.85111111	20.08555556	21.20333333	20.04666667	20.5	20.07333333	20.03	20.20555556	20.18777778	20.22444444	20.41111111	19.79333333	19.87555556	20.36444444	20.10888889	20.29333333	19.08	19.25555556	18.07555556	18.19	17.57444444	19.24555556	18.64111111	19.80555556	18.06444444	19.15333333	19.38666667	19.73333333	19.26555556
8/11/19 11:41:53	-118.5137123	42.54344991	1234.044871	8/11/19 11:42:52	20.20777778	21.21888889	21.03555556	21.12111111	21.45222222	21.39111111	20.44888889	20.76	21.92333333	21.34555556	21.80111111	21.06222222	20.75777778	21.49888889	20.90666667	21.28666667	21.62111111	20.89888889	21.99555556	20.87111111	21.33333333	20.78888889	20.75555556	20.92	20.87555556	21.11222222	21.15111111	20.58444444	20.63	21.17444444	20.92	21	19.88	20.09444444	19.06111111	18.82333333	18.05111111	20.05888889	19.35555556	20.59555556	18.84222222	19.66777778	20.12888889	20.64	20.16888889
8/11/19 11:41:54	-118.5137266	42.54345362	1234.051597	8/11/19 11:42:53	21.367	22.581	22.357	22.215	22.637	22.67	21.738	21.993	23.151	22.633	23.206	22.288	22.041	22.664	22.243	22.545	22.842	22.095	23.225	22.026	22.51	22.028	22.033	22.16	22.118	22.371	22.327	21.781	21.87	22.35	22.121	22.24	21.026	21.188	20.029	20.089	19.1	21.165	20.457	21.908	20.032	21.151	21.528	21.848	21.444
8/11/19 11:41:55	-118.5137394	42.54345671	1234.041403	8/11/19 11:42:54	21.71777778	22.74222222	22.40777778	22.42333333	22.84888889	22.86666667	21.91888889	22.28888889	23.48222222	22.96555556	23.38	22.57333333	22.24222222	22.97111111	22.57	22.9	23.21777778	22.40333333	23.53444444	22.49333333	22.80333333	22.40333333	22.29777778	22.49666667	22.49111111	22.73111111	22.69777778	22.12888889	22.18666667	22.73111111	22.67111111	22.59111111	21.49666667	21.60888889	20.04777778	20.28555556	20.08888889	21.73222222	20.73222222	22.19888889	20.66444444	21.49222222	21.95666667	22.30777778	21.77444444
8/11/19 11:41:56	-118.5137514	42.54345925	1234.04691	8/11/19 11:42:55	21.74777778	22.85222222	22.82333333	22.66555556	22.99222222	23.15444444	22.19777778	22.5	23.64666667	23.08333333	23.57222222	22.68666667	22.41666667	23.14	22.65333333	23.08666667	23.28111111	22.60666667	23.66666667	22.47666667	22.95666667	22.49666667	22.52666667	22.71888889	22.62777778	22.73222222	22.81555556	22.30444444	22.30555556	22.81777778	22.76555556	22.84	21.36555556	21.63333333	20.24	20.37222222	19.92222222	21.80111111	21.13333333	22.28888889	20.82888889	21.60333333	21.97	22.44444444	21.93111111
8/11/19 11:41:57	-118.5137631	42.54346186	1234.05609	8/11/19 11:42:56	21.32666667	22.40777778	22.08666667	22.32444444	22.68666667	22.54444444	21.68555556	21.95333333	23.01666667	22.47444444	23.05555556	22.20777778	21.85666667	22.60333333	22.20666667	22.52333333	22.80555556	21.93888889	23.06666667	21.97444444	22.43666667	21.91444444	21.90555556	22.14222222	22.05888889	22.19	22.33888889	21.68777778	21.81444444	22.34222222	22.04888889	22.17333333	20.92444444	21.05222222	19.88333333	20.08888889	19.59444444	21.19555556	20.43444444	21.88	20.16888889	21.03444444	21.49555556	21.95444444	21.40888889
8/11/19 11:41:58	-118.5137762	42.54346479	1234.04911	8/11/19 11:42:57	21.19333333	22.14888889	22.08444444	22.20333333	22.44	22.30444444	21.51	21.72222222	22.97333333	22.40333333	22.95777778	22.02888889	21.75444444	22.46111111	21.99333333	22.32666667	22.57111111	21.82333333	23.00333333	21.82777778	22.23333333	21.71777778	21.77111111	21.93777778	21.81666667	21.99	22.12111111	21.54777778	21.63444444	22.02555556	21.96	22.04444444	20.79555556	20.92333333	19.74111111	20.05111111	19.35111111	21.19	20.24	21.78333333	20.01222222	21.02333333	21.29888889	21.75444444	21.11444444
8/11/19 11:41:59	-118.5137891	42.54346799	1234.040039	8/11/19 11:42:58	21.29444444	22.48222222	22.28333333	22.12333333	22.44555556	22.42333333	21.45222222	21.85888889	22.95	22.40444444	22.88888889	22.06	21.81444444	22.42444444	22.00666667	22.28	22.59666667	21.75	22.84	21.77777778	22.24	21.77333333	21.82222222	21.94555556	21.70888889	21.95	22.15	21.58333333	21.59888889	22.14555556	21.80666667	21.98222222	20.76888889	20.80111111	19.56888889	19.84444444	19.41666667	21.08444444	20.27777778	21.67444444	19.86666667	20.80555556	21.20888889	21.45777778	21.11666667
8/11/19 11:42:00	-118.5138032	42.54347177	1234.018423	8/11/19 11:42:59	22.88111111	24.08888889	24.03444444	23.68888889	24.02888889	24.02666667	23.08888889	23.31777778	24.62333333	24.03333333	24.6	23.73111111	23.43333333	24.07222222	23.57777778	23.97666667	24.21	23.50555556	24.51222222	23.50111111	23.84333333	23.33666667	23.32666667	23.43555556	23.43555556	23.58222222	23.78555556	23.17111111	23.18555556	23.66666667	23.59777778	23.59111111	22.39333333	22.42333333	21.06333333	21.24777778	20.80111111	22.67777778	22.05888889	22.91444444	21.48111111	22.32444444	22.74777778	23.20555556	22.73
8/11/19 11:42:01	-118.5138181	42.54347582	1234.012213	8/11/19 11:43:00	24.21444444	25.01666667	25.07222222	24.89333333	25.27222222	25.29111111	24.34444444	24.69111111	25.77111111	25.27666667	25.79222222	24.73888889	24.53555556	25.30555556	24.84	25.05	25.43444444	24.64444444	25.70666667	24.61555556	25.1	24.53666667	24.46777778	24.75111111	24.57444444	24.71222222	24.95777778	24.30444444	24.43777778	24.91	24.83111111	24.76888889	23.41888889	23.39111111	22.34444444	22.58111111	21.71777778	24.01444444	23.11777778	24.25222222	22.73	23.63333333	23.94555556	24.35666667	23.96111111
8/11/19 11:42:02	-118.5138333	42.54347977	1234.01021	8/11/19 11:43:01	25.37777778	26.68111111	26.56555556	26.49222222	26.85111111	26.48444444	25.99222222	26.11222222	27.40666667	26.71111111	27.29222222	26.39777778	26.1	26.80111111	26.34666667	26.72666667	26.93222222	26.12444444	27.17888889	26.14111111	26.56666667	26.07111111	26.05333333	26.19777778	26.10111111	26.31666667	26.43111111	25.82222222	25.86666667	26.49222222	26.26555556	26.25333333	25.11444444	25.26888889	23.80888889	24.00333333	23.34333333	25.21111111	24.33777778	25.89333333	24.27555556	25.28444444	25.59333333	26.23222222	25.48888889
8/11/19 11:42:03	-118.5138494	42.54348396	1233.983461	8/11/19 11:43:02	26.84555556	27.90111111	27.82	27.70555556	28.29111111	28.02333333	27.25555556	27.43888889	28.69666667	28.02666667	28.60888889	27.66888889	27.53111111	28.11	27.65	28.01333333	28.33777778	27.52444444	28.55444444	27.49666667	27.97666667	27.45777778	27.35777778	27.54	27.51666667	27.61777778	27.66777778	27.12777778	27.15555556	27.66666667	27.65555556	27.62222222	26.46777778	26.07333333	24.86555556	25.31777778	24.73777778	26.76111111	25.83333333	27.20888889	25.61444444	26.55444444	27.02777778	27.49888889	27.06888889
8/11/19 11:42:04	-118.5138663	42.54348812	1233.942532	8/11/19 11:43:03	28.76333333	29.61777778	29.44777778	29.46222222	29.81333333	29.77777778	28.96555556	29.19666667	30.35888889	29.76111111	30.36555556	29.43333333	29.19222222	29.82777778	29.43333333	29.79333333	30.01111111	29.24666667	30.23222222	29.27444444	29.55333333	29.12888889	29.06444444	29.29222222	29.14222222	29.32333333	29.49555556	28.81444444	28.79111111	29.3	29.34	29.24	28.04555556	28.11222222	26.57333333	26.95666667	26.52444444	28.18111111	27.44777778	28.84111111	27.39777778	28.29555556	28.78222222	29.15	28.63555556
8/11/19 11:42:05	-118.5138839	42.54349226	1233.90901	8/11/19 11:43:04	29.88222222	31.08777778	30.69444444	30.62555556	31.04555556	30.98555556	30.14111111	30.40444444	31.58333333	30.91333333	31.46555556	30.68444444	30.22888889	30.99333333	30.64333333	30.72	31.08666667	30.24666667	31.39444444	30.43222222	30.68	30.10666667	30.05222222	30.22888889	30.18	30.38666667	30.48	29.79777778	29.89444444	30.34777778	30.30555556	30.24444444	29	29.18444444	28.11777778	27.78444444	27.74111111	29.19222222	28.67111111	29.87666667	28.40222222	29.27	29.68	30.16666667	29.67777778
8/11/19 11:42:06	-118.5139017	42.54349661	1233.88488	8/11/19 11:43:05	31.10222222	32.09333333	32.03777778	32.02222222	32.20888889	32.19333333	31.31444444	31.69888889	32.77888889	32.17	32.73111111	31.95555556	31.64444444	32.26777778	32.02	32.14111111	32.43111111	31.59111111	32.61111111	31.67555556	31.89333333	31.53111111	31.26222222	31.42888889	31.44	31.43222222	31.55666667	31.15	30.98111111	31.59333333	31.59222222	31.48888889	30.19444444	30.11777778	28.98222222	28.84333333	28.54444444	30.52111111	29.65	31.26666667	29.60222222	30.42888889	30.87333333	31.32777778	30.90111111
8/11/19 11:42:07	-118.5139183	42.54350117	1233.869472	8/11/19 11:43:06	32.34	33.50222222	33.05444444	33.04777778	33.42	33.38666667	32.49222222	32.67444444	33.85	33.28444444	33.92888889	33.16666667	32.71888889	33.45111111	32.96888889	33.41333333	33.56777778	32.86	33.80111111	32.66777778	33.11333333	32.64222222	32.48777778	32.56222222	32.58222222	32.64222222	32.70777778	32.13888889	32.18111111	32.74	32.49666667	32.47111111	31.27111111	31.27888889	30.04	30.17888889	29.88111111	31.67333333	31.01222222	31.96333333	30.56222222	31.46333333	31.92555556	32.51111111	31.83666667
8/11/19 11:42:08	-118.5139362	42.54350604	1233.862405	8/11/19 11:43:07	35.08111111	36.21666667	35.96444444	35.96333333	36.46111111	36.28555556	35.26222222	35.55	36.86555556	36.34444444	36.76444444	35.79777778	35.54222222	36.13666667	35.71555556	36.01	36.32555556	35.43666667	36.47	35.42222222	35.93333333	35.24555556	35.20666667	35.33111111	35.30111111	35.36666667	35.42666667	34.90444444	34.86	35.27333333	35.16222222	35.26222222	33.89111111	34.02666667	32.47888889	32.78777778	32.27777778	34.31111111	33.45111111	34.82333333	33.41444444	33.98333333	34.57333333	34.94222222	34.38888889
8/11/19 11:42:09	-118.5139557	42.54351163	1233.870681	8/11/19 11:43:08	38.767	39.793	39.552	39.593	39.706	39.815	39.147	39.29	40.631	39.781	40.302	39.358	38.991	39.678	39.132	39.568	39.743	38.91	39.941	38.684	39.215	38.699	38.513	38.734	38.733	38.646	38.728	38.207	38.216	38.651	38.419	38.34	37.104	36.873	35.626	35.758	35.412	37.371	36.466	37.995	36.404	37.207	37.614	38.233	37.535
8/11/19 11:42:10	-118.5139715	42.54351604	1233.833375	8/11/19 11:43:09	39.26	40.05111111	40.04111111	40.05111111	40.24666667	40.38777778	39.60777778	39.85555556	41.11888889	40.39888889	40.87777778	40.04111111	39.74111111	40.27888889	39.72	40.06333333	40.31888889	39.43111111	40.46	39.37666667	39.77444444	39.31555556	39.18111111	39.32555556	39.32	39.32222222	39.39111111	38.80111111	38.82777778	39.15333333	39.04	38.96	37.67333333	37.58	36.25111111	36.23444444	36.14888889	37.89222222	36.90666667	38.53777778	36.92	37.77666667	38.27	38.81333333	38.23777778
8/11/19 11:42:11	-118.513989	42.54352092	1233.812168	8/11/19 11:43:10	37.86555556	38.65444444	38.41333333	38.33222222	38.73555556	38.8	37.89	38.24777778	39.55222222	38.85666667	39.46333333	38.51888889	38.15333333	38.84	38.34	38.64555556	38.89666667	38.12444444	39.12666667	38.11666667	38.49333333	37.89555556	37.80333333	37.97444444	38.03222222	38.06555556	38.1	37.63888889	37.54555556	37.92	37.76666667	37.79555556	36.39666667	35.96111111	34.94	35.07666667	34.76333333	36.73	35.70111111	37.50444444	35.94666667	36.85888889	37.03444444	37.46333333	37.10444444
8/11/19 11:42:12	-118.5140089	42.54352645	1233.842719	8/11/19 11:43:11	35.15555556	36.13666667	35.89	36.02888889	36.36666667	36.45222222	35.44555556	35.73333333	37.05222222	36.41555556	37.04444444	36.14111111	35.82666667	36.45444444	35.89	36.35	36.58555556	35.74111111	36.69222222	35.72111111	36.17	35.70222222	35.59	35.76666667	35.73888889	35.74888889	35.82444444	35.19333333	35.07444444	35.56777778	35.42333333	35.54222222	34.02666667	33.97	32.41777778	32.87555556	32.50111111	34.51888889	33.41	34.99111111	33.71555556	34.46333333	34.96222222	35.42444444	34.79555556
8/11/19 11:42:13	-118.5140261	42.54353096	1233.911565	8/11/19 11:43:12	33.99222222	35.12444444	34.85444444	34.82444444	35.16111111	35.17111111	34.09777778	34.59666667	35.75777778	35.34333333	35.88888889	35.10333333	34.53222222	35.33777778	34.84333333	35.11333333	35.50777778	34.65	35.71888889	34.54777778	35.16	34.46	34.54444444	34.62333333	34.60333333	34.67888889	34.63555556	34.12333333	34.10666667	34.42666667	34.43666667	34.47555556	33.04666667	33.00333333	31.73777778	31.90222222	31.27444444	33.31222222	32.33	34.13222222	32.46555556	33.26111111	33.80222222	34.25111111	33.74222222
8/11/19 11:42:14	-118.5140435	42.54353597	1233.987484	8/11/19 11:43:13	33.54888889	34.63333333	34.54	34.40333333	34.79111111	34.78	33.72444444	34.03555556	35.39777778	34.83555556	35.45	34.48333333	34.07777778	34.92111111	34.38666667	34.83	35.03444444	34.16666667	35.19888889	34.19555556	34.61	34.03666667	33.98555556	34.17555556	33.97888889	34.16666667	34.25888889	33.56777778	33.55222222	34.07444444	33.87888889	34.03111111	32.48	32.34111111	30.85333333	31.46333333	30.98555556	33.14777778	31.74111111	33.62333333	32.22444444	32.92222222	33.31333333	33.85111111	33.23444444
8/11/19 11:42:15	-118.5140608	42.5435411	1234.03648	8/11/19 11:43:14	32.86666667	34.11444444	33.67555556	33.75444444	34.08444444	34.22222222	33.19	33.42777778	34.73222222	34.20888889	34.71666667	33.89111111	33.56444444	34.29777778	33.73111111	34.1	34.37666667	33.52	34.64	33.57555556	33.90333333	33.52555556	33.34888889	33.43888889	33.36555556	33.48222222	33.56777778	32.95222222	32.95111111	33.45888889	33.31555556	33.33333333	31.85444444	31.55333333	30.04888889	30.82222222	30.04	32.31444444	31.40666667	32.78666667	31.37333333	32.31333333	32.68	33.04888889	32.66888889
8/11/19 11:42:16	-118.5140797	42.54354664	1234.054148	8/11/19 11:43:15	30	30.88	30.64111111	30.80111111	31.17333333	31.22666667	30.04555556	30.38333333	31.60333333	31.02555556	31.55444444	30.67777778	30.41444444	31.02777778	30.68	30.84	31.15222222	30.30888889	31.38777778	30.45555556	30.74333333	30.29444444	30.10111111	30.21222222	30.21888889	30.29222222	30.46888889	29.93888889	29.89	30.40555556	30.24777778	30.22666667	28.81777778	28.66888889	27.33666667	27.73444444	27.17	29.24888889	27.96555556	30.01222222	28.56666667	29.36666667	29.64222222	29.96777778	29.49444444
8/11/19 11:42:17	-118.5140986	42.54355212	1234.079403	8/11/19 11:43:16	26.47333333	27.46888889	27.31555556	27.39111111	27.70555556	27.73222222	26.85555556	26.98	28.31111111	27.60333333	28.21888889	27.2	26.96888889	27.73111111	27.23111111	27.49333333	27.74333333	27.00222222	28.15	26.97	27.41111111	26.83111111	26.90888889	26.98777778	27.07	27.11555556	27.27333333	26.62444444	26.71777778	27.30888889	27.06222222	26.99555556	25.82444444	25.82333333	24.57	24.48111111	23.89777778	25.90666667	25.23111111	26.63888889	25.01777778	25.91	26.41111111	26.79111111	26.29111111
8/11/19 11:42:18	-118.514116	42.543557	1234.105312	8/11/19 11:43:17	29.57888889	30.59777778	30.51222222	30.48	30.87333333	30.93444444	29.94111111	30.24	31.45666667	30.90777778	31.38333333	30.46777778	30.15333333	30.87333333	30.43444444	30.78333333	31.06555556	30.27333333	31.26777778	30.35888889	30.67888889	30.09888889	30.05333333	30.26777778	30.21	30.27333333	30.43666667	29.75222222	29.83444444	30.35888889	30.34444444	30.30222222	28.81	28.83888889	27.72111111	27.70444444	27.17888889	29.05555556	28.32666667	29.68666667	28.20222222	28.93555556	29.56222222	30.10555556	29.63888889
8/11/19 11:42:19	-118.5141359	42.54356245	1234.103014	8/11/19 11:43:18	30.26	31.47666667	31.35	31.28666667	31.55555556	31.71222222	30.67222222	30.88888889	32.31111111	31.62555556	32.15444444	31.35111111	30.98444444	31.72333333	31.27	31.60666667	31.87222222	31.15333333	32.09	31.16888889	31.39666667	30.97888889	30.87888889	30.98444444	31.03666667	31.06555556	31.23555556	30.59	30.70888889	31.13666667	30.98555556	31.18666667	29.64666667	29.48111111	28.03777778	28.29	27.98333333	30.02666667	28.89888889	30.44444444	29.16555556	30.02333333	30.40888889	30.77888889	30.30222222
8/11/19 11:42:20	-118.5141572	42.54356853	1234.037852	8/11/19 11:43:19	27.98555556	28.93333333	29.10666667	28.93444444	29.34555556	29.33	28.44	28.65666667	29.92333333	29.23555556	29.77888889	28.88666667	28.55666667	29.24222222	28.80333333	29.15666667	29.46333333	28.61555556	29.68555556	28.61555556	29.03	28.57555556	28.46888889	28.55888889	28.64777778	28.76666667	28.89555556	28.37222222	28.33555556	28.79	28.83	28.69333333	27.25444444	27.17	25.93333333	26.08888889	25.50444444	27.72555556	26.71888889	28.10555556	26.71333333	27.74666667	28.13	28.54444444	28.01333333
8/11/19 11:42:21	-118.5141757	42.54357368	1233.969545	8/11/19 11:43:20	26.72333333	28.02666667	27.82333333	27.79555556	28.04	28.19666667	27.19555556	27.50555556	28.72333333	28.09222222	28.57555556	27.61333333	27.28444444	28.12333333	27.59111111	27.97	28.20666667	27.37666667	28.55666667	27.31333333	27.77333333	27.30111111	27.32111111	27.42666667	27.34333333	27.46777778	27.56333333	27.15	27.05777778	27.51888889	27.50222222	27.50666667	26.06888889	26.09888889	24.77333333	25.12444444	24.38222222	26.44444444	25.49111111	27.17111111	25.62666667	26.56555556	26.90666667	27.27777778	26.75666667
8/11/19 11:42:22	-118.5141935	42.54357868	1233.918071	8/11/19 11:43:21	23.09555556	24.12555556	23.99444444	24.14111111	24.54666667	24.47333333	23.46888889	23.85	24.95222222	24.29222222	24.73222222	23.86777778	23.57333333	24.31777778	23.76555556	24.14111111	24.36333333	23.61777778	24.66	23.52444444	24.02222222	23.54222222	23.52555556	23.56111111	23.47777778	23.61333333	23.77	23.26777778	23.27333333	23.62444444	23.71111111	23.68444444	22.39666667	22.44888889	21.40888889	21.41444444	21.00666667	22.86888889	21.86888889	23.29444444	21.86333333	22.78222222	22.91666667	23.26111111	22.74333333
8/11/19 11:42:23	-118.5142114	42.54358362	1233.925783	8/11/19 11:43:22	20.05222222	21.21777778	21.06333333	20.88888889	21.33333333	21.28	20.24444444	20.56777778	21.72444444	21.16666667	21.64555556	20.72666667	20.37333333	20.97333333	20.53666667	20.90666667	21.08111111	20.29666667	21.57444444	20.25333333	20.76666667	20.28888889	20.25666667	20.33444444	20.35	20.47555556	20.55111111	19.93666667	20.10333333	20.49222222	20.50888889	20.46666667	19.30777778	19.49777778	18.50111111	18.52111111	18.08888889	19.74888889	18.83777778	20.30777778	18.54222222	19.28555556	19.57333333	19.97555556	19.48777778
8/11/19 11:42:24	-118.5142297	42.54358864	1233.924823	8/11/19 11:43:23	19.253	20.226	20.123	20.013	20.358	20.214	19.289	19.581	20.787	20.043	20.671	19.664	19.418	20.156	19.563	19.86	20.273	19.281	20.546	19.331	19.801	19.182	19.224	19.354	19.239	19.426	19.607	18.946	19.021	19.597	19.523	19.62	18.369	18.652	17.768	17.949	16.97	18.803	18.244	19.452	17.671	18.431	18.565	19.016	18.461
8/11/19 11:42:25	-118.5142483	42.54359361	1233.922316	8/11/19 11:43:24	18.99888889	20.32777778	20.04111111	19.95777778	20.35666667	20.36111111	19.32666667	19.64888889	20.88444444	20.09666667	20.63	19.63444444	19.31888889	20.07333333	19.59111111	19.89	20.11222222	19.39777778	20.35333333	19.22444444	19.65666667	19.29222222	19.21111111	19.34	19.26555556	19.38444444	19.60888889	18.99333333	18.99333333	19.59888889	19.47666667	19.46222222	18.12	18.77444444	17.48444444	17.5	17.02333333	18.84444444	18.21777778	19.47111111	17.58777778	18.39666667	18.63555556	18.91111111	18.44222222
8/11/19 11:42:26	-118.514267	42.54359862	1233.917465	8/11/19 11:43:25	19.39777778	20.37888889	20.37	20.18777778	20.47666667	20.47666667	19.46888889	19.72111111	20.93888889	20.24444444	20.78444444	19.79	19.57777778	20.15333333	19.72777778	20.02333333	20.19111111	19.46111111	20.58444444	19.43222222	19.84666667	19.37444444	19.28111111	19.38444444	19.30666667	19.48	19.69888889	19.05888889	19.25	19.66	19.48	19.71555556	18.36	18.72555556	17.62666667	17.90666667	16.93777778	18.88666667	18.12333333	19.19666667	17.61333333	18.33555556	18.68444444	18.99777778	18.45222222
8/11/19 11:42:27	-118.5142861	42.5436039	1233.908761	8/11/19 11:43:26	18.11888889	19.22111111	19.05777778	19.03111111	19.41777778	19.33555556	18.28	18.59777778	19.77444444	19.17888889	19.64888889	18.75666667	18.43111111	19.06333333	18.58333333	18.93333333	19.09333333	18.32444444	19.46333333	18.34222222	18.65222222	18.25333333	18.19222222	18.33777778	18.17888889	18.30222222	18.46333333	17.94555556	18.07444444	18.44666667	18.37666667	18.48	17.25222222	17.47666667	16.46777778	16.59222222	15.96444444	17.77222222	16.80666667	18.28333333	16.44333333	17.16222222	17.55888889	17.74555556	17.28888889
8/11/19 11:42:28	-118.5143027	42.54360875	1233.915075	8/11/19 11:43:27	17.89666667	18.89888889	18.99888889	18.84888889	19.47555556	19.22666667	18.26888889	18.51	19.66666667	18.99777778	19.57222222	18.53222222	18.24444444	19.02	18.41333333	18.68	19.01111111	18.02111111	19.35	18.09	18.62888889	18.04666667	17.95333333	18.21111111	18.09666667	18.25444444	18.29555556	17.76333333	17.88	18.28666667	18.22888889	18.26666667	17.12	17.44333333	16.29666667	16.44666667	15.64555556	17.44111111	16.62555556	18.23888889	16.32444444	17.02	17.24777778	17.59	17.03
8/11/19 11:42:29	-118.5143216	42.5436144	1233.899532	8/11/19 11:43:28	18.32777778	19.59888889	19.36666667	19.25777778	19.48666667	19.64666667	18.71555556	18.83888889	20.08777778	19.46333333	20.04888889	18.95222222	18.64444444	19.26	18.89666667	19.15333333	19.41	18.58111111	19.73444444	18.54888889	18.91666667	18.44444444	18.49	18.50222222	18.47444444	18.66111111	18.77333333	18.23777778	18.22666667	18.68888889	18.67444444	18.63111111	17.54	18.04	16.89555556	16.73888889	16.25444444	17.93777778	17.10666667	18.56777778	16.76222222	17.52555556	17.74555556	18.12888889	17.55333333
8/11/19 11:42:30	-118.5143432	42.54362079	1233.899252	8/11/19 11:43:29	18.89666667	19.73111111	19.80888889	19.74222222	20.00111111	20.06777778	18.97555556	19.33777778	20.41	19.80222222	20.28666667	19.24666667	18.95333333	19.66666667	19.03666667	19.53333333	19.72666667	18.8	20.00555556	18.88	19.23666667	18.78666667	18.80222222	18.79888889	18.89888889	18.98111111	19.01	18.50111111	18.55111111	19.09111111	18.99666667	18.96	17.73444444	18	16.83444444	17.16777778	16.45222222	18.30111111	17.58333333	18.81111111	16.90555556	17.78888889	18.08333333	18.42222222	17.73777778
8/11/19 11:42:31	-118.5143635	42.54362672	1233.93629	8/11/19 11:43:30	19.76888889	20.89111111	20.74333333	20.67333333	21.08666667	20.99	19.98333333	20.17111111	21.33333333	20.72666667	21.29777778	20.22777778	19.90333333	20.63	20.08555556	20.46	20.70888889	19.87111111	21.01333333	19.85111111	20.19666667	19.63555556	19.77333333	19.79111111	19.72666667	19.78	19.92	19.39444444	19.49888889	19.89555556	19.85111111	19.97333333	18.6	19.10333333	17.99444444	17.99444444	17.48222222	18.76333333	18.27222222	19.67666667	17.78777778	18.42333333	18.88444444	19.09777778	18.60555556
8/11/19 11:42:32	-118.5143846	42.54363267	1233.952581	8/11/19 11:43:31	24.66555556	26.02	25.73222222	25.69333333	25.93333333	25.90444444	25.03888889	25.25444444	26.40111111	25.74111111	26.22333333	25.25444444	24.83333333	25.67444444	25.08555556	25.38111111	25.66666667	24.8	25.86111111	24.74666667	25.23	24.52555556	24.60111111	24.64555556	24.53666667	24.72666667	24.80777778	24.16444444	24.22333333	24.74777778	24.61111111	24.49333333	23.51	23.73555556	22.56888889	22.55333333	22.23333333	23.60555556	23.13222222	24.28111111	22.54333333	23.06	23.36777778	23.75444444	23.19888889
8/11/19 11:42:33	-118.5144059	42.5436382	1233.976147	8/11/19 11:43:32	25.26666667	26.25777778	26.27666667	26.19555556	26.44	26.50777778	25.45777778	25.69555556	26.82555556	26.15888889	26.78555556	25.79777778	25.46555556	26.11222222	25.47333333	25.85666667	26.04222222	25.22222222	26.27111111	25.14444444	25.54333333	24.91222222	25.00333333	25.05	24.97666667	25.04111111	25.23555556	24.60111111	24.64333333	25.1	24.94333333	25.04	23.89777778	24.11666667	23.03555556	23.17666667	22.39	23.90333333	23.29555556	24.54777778	22.70777778	23.50222222	23.82	24.08444444	23.56444444
8/11/19 11:42:34	-118.5144269	42.54363569	1233.973158	8/11/19 11:43:33	28.79888889	29.64555556	29.53	29.53888889	30.00555556	29.90777778	28.84888889	28.98222222	30.19111111	29.61666667	30.06555556	29.13333333	28.75111111	29.45	28.98666667	29.27	29.43222222	28.68555556	29.61555556	28.53222222	28.90444444	28.39666667	28.32888889	28.40111111	28.31222222	28.44111111	28.48888889	27.93888889	27.88888889	28.40111111	28.15	28.23555556	26.93333333	27.03444444	25.98444444	26.25555556	25.38444444	27.20111111	26.49333333	27.67777778	26.12888889	26.54333333	27.00111111	27.25666667	26.64888889
8/11/19 11:42:35	-118.5144488	42.54362036	1233.9208	8/11/19 11:43:34	28.67222222	29.92111111	29.30444444	29.31666667	29.51777778	29.66111111	28.60555556	28.85555556	29.95	29.31666667	29.79222222	28.95666667	28.56222222	29.20333333	28.84777778	29.01444444	29.34555556	28.36111111	29.49444444	28.43222222	28.66777778	28.24111111	28.01888889	28.17444444	28.18444444	28.33555556	28.21888889	27.69222222	27.69111111	28.35888889	28.12	28.08888889	26.96	27.17	25.97444444	26.34222222	25.59777778	27.18777778	26.43555556	27.73333333	25.80111111	26.62	27.01888889	27.15333333	26.54888889
8/11/19 11:42:36	-118.5144646	42.54360394	1233.878768	8/11/19 11:43:35	31.57666667	32.32222222	32.31	32.25	32.60222222	32.37333333	31.32666667	31.48	32.68	32.07333333	32.52555556	31.64444444	31.35333333	32.01777778	31.50666667	31.78	32.11666667	31.28444444	32.15888889	31.13	31.45	30.84333333	30.75444444	30.96666667	30.81333333	30.87	30.95555556	30.34555556	30.3	30.78222222	30.68555556	30.78666667	29.42333333	29.34333333	28.48555556	28.87333333	28.00222222	29.83444444	28.6	30.30333333	28.36444444	29.04666667	29.33333333	29.68	29.03555556
8/11/19 11:42:37	-118.5144663	42.54359539	1233.95226	8/11/19 11:43:36	31.27444444	32.1	31.94333333	32.08555556	32.15666667	32.21222222	31.17555556	31.53	32.57888889	31.94333333	32.38333333	31.55444444	31.17888889	31.83777778	31.25333333	31.56333333	31.92666667	31.09777778	32.02	30.99555556	31.3	30.73	30.67777778	30.66555556	30.72333333	30.87333333	30.80888889	30.25666667	30.23777778	30.69555556	30.61111111	30.56888889	29.31111111	29.41666667	28.16888889	28.50444444	27.92777778	29.63444444	28.49111111	29.86888889	28.33222222	29.06222222	29.24444444	29.53777778	28.94444444
8/11/19 11:42:38	-118.5144604	42.54358783	1234.011923	8/11/19 11:43:37	29.81555556	30.87333333	30.70777778	30.66888889	30.87333333	30.94111111	29.92888889	30.11666667	31.22888889	30.59222222	31.11555556	30.25888889	29.82111111	30.64	30.07	30.36666667	30.60555556	29.83666667	30.77111111	29.58777778	30.09	29.54	29.53	29.55777778	29.43777778	29.56555556	29.61666667	28.99444444	29.09777778	29.56777778	29.52555556	29.41777778	28.20777778	28.30666667	26.98888889	27.25777778	26.76	28.23555556	27.61333333	28.82555556	27.12111111	27.82777778	27.94111111	28.35555556	27.69666667
8/11/19 11:42:39	-118.5144506	42.54358141	1233.979116	8/11/19 11:43:38	28.70333333	29.78111111	29.48222222	29.44333333	29.66111111	29.61666667	28.76444444	29.03555556	29.98333333	29.39777778	29.98888889	29.11777778	28.67555556	29.27333333	28.82	29.10666667	29.36777778	28.47666667	29.58	28.49666667	28.86111111	28.22111111	28.27555556	28.31444444	28.26555556	28.40555556	28.48666667	27.78222222	27.86888889	28.28666667	28.32888889	28.27555556	26.81111111	27.24111111	26.01333333	26.21444444	25.77777778	27.22444444	26.53222222	27.81555556	25.87777778	26.49444444	26.86111111	27.23777778	26.58333333
8/11/19 11:42:40	-118.514439	42.54357561	1233.927365	8/11/19 11:43:39	27.68222222	28.83555556	28.56222222	28.45	28.70555556	28.85555556	27.81666667	28.09444444	29.16555556	28.50666667	29.03555556	28.17333333	27.72222222	28.46888889	27.92555556	28.20333333	28.42888889	27.63666667	28.80111111	27.51222222	27.88666667	27.39333333	27.35222222	27.50888889	27.43666667	27.51444444	27.68333333	26.91444444	26.99	27.48888889	27.33222222	27.46222222	26.26666667	26.44555556	25.26222222	25.50444444	25.03777778	26.34777778	25.38777778	27.08555556	25.16888889	25.76777778	26.09111111	26.48222222	25.96111111
8/11/19 11:42:41	-118.5144251	42.54356969	1233.853216	8/11/19 11:43:40	27.128	28.132	27.958	27.989	28.275	28.204	27.18	27.395	28.644	28.025	28.436	27.518	27.23	27.807	27.387	27.689	27.906	27.123	28.198	26.991	27.374	26.831	26.825	26.884	26.87	26.945	27.044	26.44	26.435	26.931	26.83	26.776	25.555	25.81	24.456	24.688	24.191	25.748	25.12	26.217	24.567	25.191	25.54	25.986	25.35
8/11/19 11:42:42	-118.514409	42.54356387	1233.811653	8/11/19 11:43:41	25.81444444	26.77	26.67888889	26.47222222	26.85	26.78444444	25.76444444	26.06111111	27.23777778	26.57111111	27.06333333	26.12333333	25.83444444	26.51	25.87111111	26.25222222	26.52111111	25.59555556	26.76555556	25.60777778	25.97222222	25.46666667	25.45333333	25.57777778	25.50444444	25.60111111	25.65666667	25.12333333	25.10555556	25.66888889	25.47444444	25.53777778	24.36444444	24.59222222	23.13666667	23.53666667	22.68	24.37	23.81111111	24.92888889	23.18333333	23.82333333	24.23	24.50888889	23.89888889
8/11/19 11:42:43	-118.5143904	42.54355777	1233.828948	8/11/19 11:43:42	20.94111111	21.96888889	21.89444444	21.87555556	22.14111111	22.01222222	21.13444444	21.27444444	22.53777778	21.97333333	22.38222222	21.45555556	21.19444444	21.78	21.25888889	21.64333333	21.82555556	21.03555556	22.17333333	20.94666667	21.40777778	20.83333333	20.93666667	20.95	20.90111111	21.05555556	21.17666667	20.49222222	20.67888889	21.09888889	21.07222222	21.08444444	19.77333333	20.52111111	19	18.82333333	18.64	20.17444444	19.50444444	20.73444444	18.83666667	19.47111111	20.00777778	20.19222222	19.72777778
8/11/19 11:42:44	-118.5143706	42.54355185	1233.891755	8/11/19 11:43:43	18.42222222	19.43333333	19.33333333	19.23777778	19.63666667	19.48444444	18.56666667	19.04111111	20.05777778	19.39444444	19.97666667	18.91222222	18.55222222	19.35	18.85333333	19.16	19.39666667	18.48333333	19.80777778	18.56777778	18.95333333	18.46666667	18.42444444	18.59333333	18.51777778	18.69111111	18.82555556	18.13555556	18.22	18.66444444	18.56222222	18.75555556	17.43111111	17.79777778	16.77333333	16.83777778	16.04111111	17.90111111	16.86111111	18.56666667	16.5	17.55555556	17.69222222	18.08111111	17.48333333
8/11/19 11:42:45	-118.5143522	42.54354696	1233.928619	8/11/19 11:43:44	18.03777778	19.38111111	19.23666667	19.11888889	19.51555556	19.60555556	18.46	18.68333333	19.91111111	19.29666667	19.87222222	18.89111111	18.53666667	19.30444444	18.75333333	19.12333333	19.44666667	18.55	19.63111111	18.47888889	18.86666667	18.36777778	18.24777778	18.52444444	18.34666667	18.56666667	18.66444444	18.14666667	18.08333333	18.50777778	18.54777778	18.65333333	17.38333333	17.65444444	16.53888889	16.74888889	16.10666667	17.81888889	17.09777778	18.46111111	16.46222222	17.47555556	17.76333333	18.07111111	17.53888889
8/11/19 11:42:46	-118.5143353	42.54354309	1233.93692	8/11/19 11:43:45	18.37777778	19.41333333	19.48888889	19.30666667	19.76111111	19.58777778	18.60777778	18.90888889	20.01333333	19.35888889	19.98777778	18.94555556	18.66333333	19.28222222	18.79666667	19.09666667	19.47	18.54666667	19.70333333	18.57444444	19.07	18.39666667	18.43888889	18.53888889	18.48444444	18.65111111	18.79111111	18.13666667	18.26	18.80333333	18.61	18.68444444	17.53555556	18.00777778	16.73222222	16.78777778	16.59111111	18.08777778	17.25444444	18.79555556	16.67555556	17.56555556	17.94111111	18.09222222	17.51777778
8/11/19 11:42:47	-118.5143189	42.54353899	1233.924777	8/11/19 11:43:46	18.44444444	19.51666667	19.36444444	19.12555556	19.64666667	19.70111111	18.65666667	18.92222222	20.02444444	19.41111111	19.98333333	18.9	18.78888889	19.31777778	18.81333333	19.16333333	19.44111111	18.68666667	19.64444444	18.50444444	18.98	18.41666667	18.46222222	18.55111111	18.50444444	18.75111111	18.80222222	18.25111111	18.31444444	18.74666667	18.66111111	18.80444444	17.42777778	17.87777778	17.16	17.14	16.36666667	17.92222222	17.20888889	18.64888889	16.74	17.42333333	17.82111111	18.13444444	17.55888889
8/11/19 11:42:48	-118.5143009	42.5435345	1233.921968	8/11/19 11:43:47	18.85888889	19.80777778	19.93888889	19.57222222	20.13333333	20.11222222	18.96555556	19.33	20.55888889	19.90333333	20.47	19.46666667	18.98555556	19.76888889	19.30111111	19.58	19.95555556	19.05555556	20.21222222	19.11666667	19.32666667	18.91666667	18.96111111	19.03111111	18.95555556	19.08111111	19.13222222	18.64	18.69777778	19.19666667	19.07666667	19.24444444	17.81333333	18.16888889	17.10777778	17.30222222	16.46888889	18.18333333	17.52888889	18.79444444	16.94666667	17.78333333	18.12333333	18.49111111	17.91222222
8/11/19 11:42:49	-118.5142805	42.54352914	1233.895142	8/11/19 11:43:48	19.86111111	20.87	20.76555556	20.76222222	21.12	21.14888889	20.04444444	20.35555556	21.46777778	20.88777778	21.44666667	20.42444444	20.07888889	20.92333333	20.45333333	20.64666667	21.03	20.08111111	21.19777778	19.99111111	20.46333333	19.98555556	20.01111111	20.09444444	19.98777778	20.17	20.30666667	19.59555556	19.70777778	20.21888889	20.28666667	20.24	19.01111111	19.19333333	18.24666667	18.11222222	17.61111111	19.29888889	18.21888889	19.83666667	18.09666667	18.95555556	19.28888889	19.45444444	19
8/11/19 11:42:50	-118.5142584	42.54352308	1233.862077	8/11/19 11:43:49	21.63	22.66777778	22.50888889	22.67666667	22.96	23.02333333	22.00444444	22.23	23.52222222	22.94333333	23.37222222	22.52555556	22.12666667	22.84555556	22.36	22.65666667	22.97111111	22.17333333	23.29111111	22.10333333	22.52333333	22.12111111	22.10444444	22.14555556	22.12222222	22.25111111	22.47222222	21.78555556	21.85666667	22.37666667	22.22888889	22.31555556	20.89222222	21.06888889	19.96555556	20.21666667	19.48333333	21.28444444	20.38888889	22.19222222	20.26888889	21.08	21.41	21.79888889	21.31555556
8/11/19 11:42:51	-118.5142335	42.54351617	1233.844948	8/11/19 11:43:50	26.03777778	27.20222222	27.3	26.98888889	27.41333333	27.37111111	26.35222222	26.74111111	27.88333333	27.24111111	27.75	26.85	26.48444444	27.28444444	26.81222222	27.11444444	27.38	26.53666667	27.71	26.52333333	27.03111111	26.52333333	26.46777778	26.67666667	26.69222222	26.77777778	26.84777778	26.30777778	26.44555556	26.82111111	26.83888889	26.96	25.40777778	25.75333333	24.30555556	24.69555556	23.89666667	26.15555556	24.81666667	26.64444444	24.96111111	25.80222222	26.18555556	26.55666667	25.89111111
8/11/19 11:42:52	-118.5142068	42.54350893	1233.8516	8/11/19 11:43:51	30.78555556	32.06222222	31.98222222	31.96555556	32.16	32.27888889	31.09888889	31.51222222	32.70777778	32.15777778	32.56444444	31.82444444	31.47	32.25888889	31.85	32.07111111	32.41	31.59	32.64333333	31.54555556	31.80666667	31.54333333	31.35222222	31.50777778	31.49666667	31.52555556	31.64888889	31.02444444	31.11666667	31.65	31.51666667	31.50666667	30.04333333	30.04666667	29.13555556	29.18444444	28.53444444	30.76555556	29.64333333	31.35666667	29.75888889	30.53444444	30.89555556	31.34555556	30.74777778
8/11/19 11:42:53	-118.5141787	42.54350142	1233.866381	8/11/19 11:43:52	32.4	33.46666667	33.36777778	33.21444444	33.66666667	33.74111111	32.59888889	32.95111111	34.10666667	33.64666667	34.11444444	33.40777778	32.92111111	33.72444444	33.21333333	33.57888889	33.77111111	33.01555556	34.05555556	33.01666667	33.37888889	32.86888889	32.67222222	32.94222222	32.77666667	33.01111111	32.98222222	32.38555556	32.41888889	32.90222222	32.80888889	32.83111111	31.43666667	31.24555556	30.11111111	30.38222222	29.98444444	31.97666667	30.83333333	32.37666667	31.11	31.95666667	32.29	32.61666667	32.17333333
8/11/19 11:42:54	-118.5141501	42.54349361	1233.833863	8/11/19 11:43:53	37.53222222	38.37888889	38.19444444	38.06777778	38.51222222	38.61888889	37.54	37.89666667	39.19444444	38.54666667	39.08666667	38.02777778	37.77777778	38.47222222	37.90888889	38.33777778	38.46	37.65777778	38.69333333	37.52	38.04333333	37.50333333	37.39111111	37.55444444	37.67444444	37.7	37.61444444	37.25888889	37.05222222	37.41666667	37.17	37.41333333	35.81888889	35.71111111	34.39222222	35.26111111	34.20333333	36.44666667	35.50444444	37.18666667	35.69444444	36.40555556	36.83222222	37.22555556	36.54666667
8/11/19 11:42:55	-118.5141218	42.54348589	1233.812668	8/11/19 11:43:54	37.661	38.777	38.484	38.463	38.866	38.971	37.874	38.309	39.501	38.812	39.38	38.319	37.996	38.612	38.109	38.514	38.705	37.861	38.83	37.734	38.242	37.638	37.623	37.71	37.773	37.801	37.955	37.417	37.244	37.6	37.66	37.608	35.993	36.078	34.833	35.4	34.808	36.925	35.727	37.18	35.917	36.705	36.977	37.321	36.709
8/11/19 11:42:56	-118.5140936	42.54347812	1233.81551	8/11/19 11:43:55	39.47333333	40.55777778	40.22555556	40.35888889	40.56333333	40.71333333	39.92666667	40.23888889	41.33333333	40.69	41.03888889	40.10666667	39.80111111	40.51555556	40.01666667	40.39	40.49555556	39.63111111	40.70444444	39.56222222	40.02888889	39.42555556	39.41111111	39.49	39.50111111	39.55	39.55666667	39.06777778	39.08444444	39.46111111	39.45666667	39.32888889	37.74111111	37.85555556	36.36444444	37.10111111	36.41111111	38.14777778	37.50333333	38.97888889	37.51111111	38.40111111	38.67888889	39.15888889	38.64555556
8/11/19 11:42:57	-118.5140658	42.54347049	1233.836616	8/11/19 11:43:56	37.60111111	38.75222222	38.71666667	38.71444444	38.91666667	39.07666667	38.11	38.47777778	39.71333333	39.10111111	39.65	38.76333333	38.33888889	38.91	38.55	38.86777778	39.06888889	38.27666667	39.23444444	38.14777778	38.57111111	38.03777778	37.95555556	38.14777778	38.00222222	38.12555556	38.23	37.70111111	37.81444444	38.07666667	37.93888889	37.84444444	36.33333333	36.42111111	35.40777778	35.47666667	34.74333333	36.88222222	36.08444444	37.59	35.99555556	36.84	37.27666667	37.67666667	37.24888889
8/11/19 11:42:58	-118.5140382	42.5434632	1233.850155	8/11/19 11:43:57	36.88111111	37.96222222	37.77777778	37.67	38.09222222	38.07555556	37.12888889	37.37777778	38.70111111	38.03666667	38.56222222	37.74777778	37.36666667	38.04666667	37.41222222	37.87	38.00444444	37.19222222	38.24777778	37.11777778	37.65333333	37.03888889	36.91444444	37.14111111	37.18	37.15111111	37.22111111	36.80222222	36.74555556	37.06111111	36.91333333	36.96444444	35.31666667	35.33333333	34.01333333	34.60777778	33.72555556	35.93111111	34.88333333	36.67	35.21777778	36.00555556	36.32444444	36.72	36.28555556
8/11/19 11:42:59	-118.5140107	42.5434559	1233.873558	8/11/19 11:43:58	33.59333333	34.79888889	34.49222222	34.60333333	34.60888889	34.79111111	33.82666667	34.02555556	35.45	34.85222222	35.36333333	34.48666667	34.26444444	34.86888889	34.27444444	34.69	34.94777778	34.05777778	35.09666667	33.99222222	34.48222222	33.90333333	33.88111111	33.92888889	33.96888889	33.90333333	34.04666667	33.51222222	33.47777778	33.91666667	33.90555556	33.78666667	32.47444444	32.41333333	31.12888889	31.76555556	31.01333333	32.73555556	31.83777778	33.56777778	32.01444444	32.86111111	33.19888889	33.70222222	33.09666667
8/11/19 11:43:00	-118.5139846	42.54344867	1233.8982	8/11/19 11:43:59	29.43555556	30.57666667	30.10222222	30.46333333	30.75333333	30.85555556	29.68333333	30.16777778	31.27777778	30.61666667	31.24333333	30.21222222	29.83888889	30.62111111	30.13333333	30.54	30.81444444	29.95333333	30.93222222	29.96777778	30.36	29.84	29.74555556	29.93888889	29.92777778	29.96777778	30.04333333	29.52111111	29.62111111	30.17777778	30.08777778	29.97333333	28.61111111	28.54	26.99	27.69555556	26.63777778	29.11222222	28.14555556	29.69111111	28.07111111	29.08222222	29.31777778	29.81777778	29.22666667
8/11/19 11:43:01	-118.5139592	42.54344152	1233.927513	8/11/19 11:44:00	28.87444444	30.01333333	30.10333333	29.65666667	30.24444444	30.33666667	29.16888889	29.56888889	30.88222222	30.10666667	30.54555556	29.74666667	29.45111111	30.07111111	29.62666667	30.06333333	30.37	29.54666667	30.61333333	29.43444444	29.92333333	29.37222222	29.30333333	29.45111111	29.44555556	29.48666667	29.70666667	29.09	29.09555556	29.63222222	29.54	29.39555556	27.97	27.92666667	26.77777778	27.07222222	26.38444444	28.62111111	27.45555556	29.19888889	27.83111111	28.57333333	28.89111111	29.28888889	28.86111111
8/11/19 11:43:02	-118.5139338	42.54343428	1233.959981	8/11/19 11:44:01	28.52555556	29.73666667	29.59111111	29.32333333	29.67888889	29.80333333	28.89111111	29.02	30.30444444	29.74333333	30.23555556	29.33666667	28.98444444	29.79666667	29.27777778	29.59666667	29.92	29.08777778	30.26444444	29.03666667	29.42	29.02333333	29.00333333	29.09777778	29.09333333	29.26	29.39111111	28.69666667	28.76555556	29.33111111	29.25	29.30222222	27.88444444	27.81333333	26.50111111	26.93555556	26.00888889	27.92555556	27.19	28.85	27.19222222	28.09888889	28.57333333	29.05	28.59888889
8/11/19 11:43:03	-118.5139071	42.54342695	1233.997053	8/11/19 11:44:02	27.16333333	28.31555556	28.25555556	28.10333333	28.60111111	28.47777778	27.59	27.88111111	29.11666667	28.5	29.09666667	28.15666667	27.67888889	28.54	28.10333333	28.54	28.72222222	27.81	28.99666667	27.85111111	28.26	27.81	27.68555556	27.80777778	27.78	27.97111111	28.03888889	27.46777778	27.54888889	28.00888889	27.85444444	27.96444444	26.58333333	26.41222222	25.07888889	25.40666667	25.01777778	26.68555556	25.82666667	27.60222222	25.87111111	26.90444444	27.37222222	27.76777778	27.24
8/11/19 11:43:04	-118.5138809	42.54341966	1234.003023	8/11/19 11:44:03	27.42222222	28.20333333	28.22777778	28.29888889	28.46	28.64777778	27.54777778	27.84444444	29.19111111	28.51555556	29.01555556	28.10666667	27.75222222	28.54222222	28.01555556	28.39333333	28.68666667	27.89888889	28.86	27.74555556	28.19444444	27.62888889	27.66444444	27.91444444	27.82333333	27.90888889	27.98	27.43222222	27.48555556	28.04444444	27.84555556	27.93333333	26.36111111	26.23333333	25.03666667	25.36888889	25.02777778	26.74888889	26.06	27.44333333	25.78333333	26.87777778	27.24666667	27.69222222	27.19888889
8/11/19 11:43:05	-118.5138542	42.54341226	1233.982232	8/11/19 11:44:04	22.83	23.99222222	23.78333333	23.77111111	24.21	24.19222222	23.26	23.47	24.69555556	24.18777778	24.63777778	23.73	23.38777778	24.21666667	23.69888889	24.11666667	24.37333333	23.56111111	24.70555556	23.47888889	23.99	23.47888889	23.41	23.55222222	23.63555556	23.77333333	23.86333333	23.26777778	23.34111111	23.84888889	23.72444444	23.73777778	22.39111111	22.25333333	21.04333333	21.44333333	20.63222222	22.83555556	21.77555556	23.52888889	21.80222222	22.64888889	23.05444444	23.44666667	22.95666667
8/11/19 11:43:06	-118.5138382	42.54340784	1233.966523	8/11/19 11:44:05	24.17	24.99444444	25.05777778	24.89333333	25.49111111	25.59	24.51555556	24.77666667	26.01888889	25.36777778	25.90888889	24.96333333	24.69444444	25.47222222	24.91	25.26444444	25.64777778	24.72777778	25.97777778	24.71333333	25.17333333	24.69777778	24.76666667	24.86888889	24.68111111	24.94666667	24.99666667	24.36111111	24.45555556	24.99111111	24.89777778	24.92888889	23.47333333	23.36777778	22.23111111	22.46666667	21.68	23.89666667	22.81666667	24.43333333	22.8	23.66777778	24.13888889	24.64666667	24.05888889
8/11/19 11:43:07	-118.5138373	42.54340824	1234.005426	8/11/19 11:44:06	24.19333333	25.27	25.02333333	25.18	25.61	25.53777778	24.56111111	24.73	26.01	25.52222222	26.03222222	25.19	24.78555556	25.54666667	24.99666667	25.30666667	25.68333333	24.87666667	26.01333333	24.93666667	25.37666667	24.76	24.85222222	24.86888889	24.90222222	25.12777778	25.14777778	24.46444444	24.55444444	25.18222222	24.94777778	24.94666667	23.45666667	23.52222222	22.17111111	22.66111111	21.95888889	23.94555556	23.10777778	24.44111111	22.92555556	24.02444444	24.32666667	24.74777778	24.21777778
8/11/19 11:43:08	-118.5138389	42.54340879	1234.021793	8/11/19 11:44:07	24.43111111	25.49111111	25.43333333	25.22555556	25.86	25.81777778	24.65666667	25.08	26.25777778	25.63	26.21333333	25.32888889	25.03222222	25.74666667	25.25666667	25.65666667	25.93222222	25.09333333	26.14777778	25.04888889	25.46333333	24.97777778	24.91777778	25.10222222	25.02333333	25.15222222	25.34222222	24.77	24.75888889	25.24	25.23666667	25.21777778	23.85666667	23.80444444	22.44555556	22.79666667	21.93222222	24.39777778	23.16111111	24.64	23.22777778	24.09	24.46	24.94333333	24.44555556
8/11/19 11:43:09	-118.5138407	42.54340928	1233.977287	8/11/19 11:44:08	24.71111111	25.85666667	25.73888889	25.61666667	25.96777778	25.98555556	25.04444444	25.38111111	26.57444444	25.94444444	26.51666667	25.54555556	25.33555556	26	25.41666667	25.85	26.17666667	25.34333333	26.51666667	25.37333333	25.8	25.24888889	25.28111111	25.39666667	25.38555556	25.40111111	25.58222222	25.06111111	25.11	25.52777778	25.40111111	25.41777778	24.20555556	24.20777778	22.93555556	23.02888889	22.32444444	24.28777778	23.50777778	25.10111111	23.29666667	24.25222222	24.78888889	25.11666667	24.72444444
8/11/19 11:43:10	-118.5138417	42.54340931	1233.96728	8/11/19 11:44:09	27.59222222	28.45777778	28.45222222	28.68111111	28.88222222	28.99777778	27.99666667	28.30777778	29.41444444	28.94	29.37666667	28.47111111	28.16	28.75777778	28.40666667	28.72333333	28.94555556	28.17555556	29.32111111	28.09	28.59333333	28.02777778	28.03	28.07222222	28.15222222	28.19777778	28.45888889	27.71777778	27.68444444	28.36	28.29777778	28.24	26.64444444	26.69666667	25.17222222	25.62111111	24.93333333	27.11222222	25.91333333	27.82111111	26.08555556	27.16777778	27.45888889	28.07555556	27.55888889
8/11/19 11:43:11	-118.5138361	42.54340729	1233.974814	8/11/19 11:44:10	25.68222222	26.80888889	26.76111111	26.42111111	26.98555556	26.93444444	26.11222222	26.16555556	27.58444444	26.93666667	27.45777778	26.59777778	26.24888889	27.04777778	26.47888889	26.94666667	27.15888889	26.27666667	27.43	26.28222222	26.72333333	26.17333333	26.12333333	26.37777778	26.28777778	26.50777778	26.52555556	25.98333333	26.02	26.51666667	26.44444444	26.34666667	25.13	25.05777778	23.36111111	24.18888889	23.45666667	25.12222222	24.4	26.03111111	24.33777778	25.35666667	25.76111111	26.11111111	25.68888889
8/11/19 11:43:12	-118.5138115	42.54339993	1233.70826	8/11/19 11:44:11	24.093	25.011	25.08	24.976	25.398	25.519	24.51	24.783	25.963	25.33	25.885	25.058	24.813	25.387	24.873	25.34	25.665	24.778	25.911	24.723	25.163	24.677	24.723	24.845	24.814	24.924	24.972	24.384	24.483	25.028	24.934	24.86	23.591	23.728	22.361	22.395	21.715	23.949	23.019	24.246	22.856	23.961	24.077	24.661	24.059
8/11/19 11:43:13	-118.5137783	42.54339082	1233.054274	8/11/19 11:44:12	24.4	25.50777778	25.69333333	25.35666667	25.89666667	25.89777778	25.01555556	25.16222222	26.45333333	25.86333333	26.33333333	25.47222222	25.16	25.89666667	25.49	25.64111111	25.98333333	25.2	26.39888889	25.20222222	25.70666667	25.19888889	25.17333333	25.28444444	25.28666667	25.41111111	25.53777778	24.92777778	24.99555556	25.56111111	25.37111111	25.23111111	24.09888889	24.14888889	22.79	22.99	22.35222222	24.22	23.44444444	24.73222222	23.34666667	24.18777778	24.63333333	25.12777778	24.63
8/11/19 11:43:14	-118.5137394	42.54338047	1232.140339	8/11/19 11:44:13	23.77666667	24.90555556	24.60777778	24.60222222	25.04444444	24.97777778	24.01111111	24.25444444	25.58555556	25.02888889	25.52555556	24.59444444	24.28222222	24.98777778	24.51333333	24.85	25.21333333	24.37666667	25.54333333	24.34111111	24.76333333	24.19555556	24.36111111	24.43111111	24.44111111	24.54444444	24.65222222	23.94111111	24.09888889	24.56666667	24.45555556	24.49333333	23.09666667	23.27	22.02666667	22.16222222	21.43777778	23.49	22.55666667	24.07	22.51222222	23.36333333	23.69777778	24.18	23.70666667
8/11/19 11:43:15	-118.5137006	42.54337034	1231.031813	8/11/19 11:44:14	23.08111111	24.31666667	24.28888889	24.14222222	24.50777778	24.59	23.51777778	23.79222222	25.06222222	24.44555556	24.97777778	24.04555556	23.75666667	24.48333333	23.97222222	24.38111111	24.66777778	23.75666667	24.90666667	23.78444444	24.19777778	23.74666667	23.64555556	23.81111111	23.80222222	23.84222222	24.04777778	23.48111111	23.52111111	24.00666667	23.92222222	23.97333333	22.49888889	22.64111111	21.38777778	21.76444444	20.94111111	23.01444444	22.05	23.51444444	21.80888889	22.72555556	23.1	23.57111111	22.96666667
8/11/19 11:43:16	-118.5136669	42.54336146	1229.888267	8/11/19 11:44:15	23.46	24.40777778	24.55333333	24.34444444	24.72777778	24.79555556	23.59888889	24.07777778	25.3	24.65111111	25.29888889	24.17111111	23.97444444	24.59666667	24.25444444	24.50888889	24.80444444	24.04111111	25.19777778	24.01666667	24.45	24.03222222	23.93888889	24.09222222	24.04555556	24.09888889	24.28555556	23.67777778	23.77444444	24.21	24.13666667	24.21777778	22.73666667	22.94777778	21.66111111	21.78444444	21.22222222	23.13777778	22.01	23.62222222	22.00888889	23.04333333	23.32111111	23.86333333	23.31444444
8/11/19 11:43:17	-118.5136368	42.5433534	1228.740216	8/11/19 11:44:16	21.50222222	22.62444444	22.43444444	22.64444444	22.79666667	23.00333333	21.86222222	22.11555556	23.46333333	22.85222222	23.43888889	22.32444444	22.11333333	22.84222222	22.35333333	22.71	23.05666667	22.09222222	23.25	22.10888889	22.57	22.05555556	21.99888889	22.19777778	22.16222222	22.22111111	22.49333333	21.86111111	21.77444444	22.54555556	22.23555556	22.24888889	21.06777778	20.92444444	19.83333333	20.05111111	19.25888889	21.27111111	20.57444444	21.96333333	20.01	21.01	21.30444444	21.82222222	21.31111111
8/11/19 11:43:18	-118.5136093	42.5433455	1227.722971	8/11/19 11:44:17	19.74777778	20.81	20.92666667	20.89444444	21.31	21.24777778	20.26777778	20.55	21.75555556	21.18444444	21.69777778	20.80666667	20.43333333	21.12333333	20.67555556	21.00666667	21.34555556	20.44	21.63777778	20.39111111	20.9	20.43	20.41444444	20.58666667	20.53222222	20.72444444	20.75111111	20.12333333	20.22555556	20.74555556	20.51666667	20.61777778	19.31333333	19.58555556	18.36	18.47111111	17.77111111	19.63	18.88444444	20.23222222	18.53333333	19.34777778	19.77111111	20.24666667	19.69444444
8/11/19 11:43:19	-118.5135839	42.54333707	1226.732855	8/11/19 11:44:18	17.79222222	18.76666667	18.75444444	18.57777778	18.95333333	19.09111111	18.03666667	18.34777778	19.55333333	19.02444444	19.53444444	18.52888889	18.21	18.93444444	18.39	18.77666667	19.09777778	18.29444444	19.45333333	18.23222222	18.65333333	18.23111111	18.18333333	18.29555556	18.29444444	18.38777778	18.56444444	17.88888889	18.08444444	18.48777778	18.35222222	18.45777778	17.24333333	17.35555556	16.15333333	16.36888889	15.72222222	17.75111111	16.81666667	18.08777778	16.37666667	17.20555556	17.55444444	17.91777778	17.37222222
8/11/19 11:43:20	-118.5135607	42.54332904	1225.671587	8/11/19 11:44:19	18.57	19.77777778	19.73333333	19.64666667	20.11555556	20.24888889	19.14888889	19.38222222	20.64777778	20.05222222	20.56444444	19.69666667	19.32222222	20.05444444	19.56444444	19.76	20.16888889	19.30444444	20.44333333	19.32333333	19.76111111	19.25111111	19.22888889	19.36333333	19.21444444	19.43	19.46888889	18.97666667	19.17777778	19.53777778	19.53333333	19.49777778	18.08888889	18.25777778	17.01777778	17.29444444	16.74222222	18.69	17.53777778	19.21222222	17.33666667	18.22111111	18.63555556	18.88888889	18.44777778
8/11/19 11:43:21	-118.5135372	42.5433213	1224.580893	8/11/19 11:44:20	18.27333333	19.35333333	19.14777778	19.16888889	19.54777778	19.64222222	18.56777778	18.95888889	20.17111111	19.52777778	20.09111111	19.22444444	18.94666667	19.62444444	19.06	19.32333333	19.70444444	18.85222222	19.99555556	18.82888889	19.23333333	18.77777778	18.74222222	18.92	18.79333333	19	19.17111111	18.44222222	18.54777778	19.14333333	18.93333333	19.08888889	17.50333333	17.64444444	16.49888889	16.66222222	16.07555556	18.07444444	17.20666667	18.53666667	16.72444444	17.55444444	17.99777778	18.34333333	17.93222222
8/11/19 11:43:22	-118.5135152	42.5433146	1223.53261	8/11/19 11:44:21	16.88111111	18.37333333	18.24111111	17.96	18.34777778	18.60111111	17.50333333	17.83	18.99888889	18.39	18.87444444	17.96444444	17.61777778	18.34333333	17.91333333	18.17777778	18.54222222	17.72444444	18.93888889	17.75	18.06555556	17.54	17.64777778	17.84333333	17.70777778	17.88666667	18.01333333	17.33333333	17.33333333	17.87888889	17.68444444	17.67111111	16.48444444	16.68555556	15.47111111	15.60888889	15.20666667	16.91111111	16.21222222	17.64666667	15.82333333	16.68111111	16.91444444	17.37444444	16.85666667
8/11/19 11:43:23	-118.513494	42.54330932	1222.513287	8/11/19 11:44:22	14.71222222	15.85222222	15.78222222	15.66222222	16.29444444	16.12444444	15.26	15.61	16.64777778	16.19888889	16.62888889	15.72444444	15.44333333	16.19555556	15.75222222	15.99222222	16.29555556	15.48888889	16.60555556	15.41888889	15.94444444	15.41444444	15.37	15.46	15.44555556	15.67666667	15.67444444	15.09222222	15.20777778	15.64666667	15.57111111	15.68	14.37	14.71555556	13.43888889	13.58444444	13.02666667	14.74111111	13.94666667	15.46555556	13.42222222	14.30666667	14.66333333	15.14	14.59777778
8/11/19 11:43:24	-118.5134735	42.54330441	1221.914852	8/11/19 11:44:23	11.82222222	13.11	12.95888889	12.90222222	13.33222222	13.25777778	12.31	12.55888889	13.85555556	13.32888889	13.86555556	12.87666667	12.41555556	13.25333333	12.71	13.15333333	13.34	12.51222222	13.76666667	12.54222222	12.98222222	12.54555556	12.60555556	12.53	12.43777778	12.63666667	12.85444444	12.12777778	12.26333333	12.74555556	12.62333333	12.64888889	11.64111111	11.87	10.95888889	10.67333333	10.46444444	11.84888889	11.35333333	12.82666667	10.80222222	11.43	11.77222222	12.11555556	11.53555556
8/11/19 11:43:25	-118.5134539	42.54329962	1221.865035	8/11/19 11:44:24	12.11	13.28111111	13.20444444	13.29333333	13.82777778	13.84444444	12.85444444	13.10666667	14.32333333	13.74444444	14.23555556	13.29	13.02111111	13.67444444	13.21	13.54333333	13.79666667	12.97111111	14.14444444	12.95111111	13.37333333	12.86444444	12.87222222	12.98	12.91555556	13.33555556	13.31555556	12.77111111	12.76777778	13.35	13.13444444	13.22666667	11.88888889	11.93444444	11.00777778	11.43111111	10.59666667	12.31666667	11.60555556	13.11	11.15444444	11.96555556	12.32111111	12.66777778	12.16555556
8/11/19 11:43:26	-118.5134441	42.54329753	1221.78665	8/11/19 11:44:25	10.614	11.52	11.563	11.613	12.103	12.021	11.041	11.391	12.469	12.009	12.525	11.478	11.184	11.995	11.455	11.791	12.097	11.289	12.387	11.2	11.738	11.185	11.19	11.303	11.284	11.407	11.512	10.854	11.077	11.536	11.325	11.512	10.144	10.71	9.488	9.877	9.123	10.677	9.896	11.292	9.362	10.283	10.548	10.867	10.344
8/11/19 11:43:27	-118.5134432	42.54329713	1221.602165	8/11/19 11:44:26	9.836666667	11.18555556	10.94111111	10.92222222	11.39444444	11.52555556	10.49444444	10.89333333	11.90888889	11.47777778	12.04222222	10.92333333	10.61	11.24666667	10.96111111	11.21444444	11.52222222	10.60111111	11.94	10.74222222	11.16	10.61666667	10.65777778	10.74888889	10.66666667	11.05444444	11.05333333	10.44222222	10.61	11.04333333	10.91222222	11.04888889	9.814444444	10.03	8.977777778	9.183333333	8.258888889	10.04333333	9.348888889	10.89888889	9.013333333	9.663333333	10.12	10.49666667	9.868888889
8/11/19 11:43:28	-118.5134407	42.54329526	1221.425471	8/11/19 11:44:27	10.93222222	12.32222222	12.25555556	12.04222222	12.63222222	12.54222222	11.67222222	12.01	13.16	12.53555556	13.07222222	12.09777778	11.93888889	12.58888889	12.14666667	12.47666667	12.79	11.76444444	13.10222222	11.88777778	12.32	11.8	11.76888889	11.97222222	11.97555556	12.21555556	12.28888889	11.52666667	11.69777778	12.23333333	11.96333333	12.09333333	10.89777778	11.24777778	9.971111111	10.34888889	9.71	11.26333333	10.60111111	11.85666667	9.981111111	10.76555556	11.19555556	11.62888889	11.00777778
8/11/19 11:43:29	-118.5134361	42.54329238	1221.139965	8/11/19 11:44:28	12.94888889	13.95777778	14.09	13.96777778	14.33111111	14.60888889	13.61777778	13.76	14.92333333	14.46777778	15.06444444	14.08444444	13.76888889	14.40444444	14.02666667	14.34111111	14.64666667	13.80666667	14.99333333	13.89555556	14.25777778	13.87	13.73111111	13.91666667	13.92555556	14.07222222	14.14666667	13.56444444	13.75333333	14.21777778	13.95888889	14.26222222	13.10222222	13.60888889	12.49222222	12.42666667	11.89666667	13.23222222	12.85111111	14.09111111	12.14666667	12.88333333	13.19888889	13.49777778	12.90333333
8/11/19 11:43:30	-118.5134306	42.54328961	1220.843203	8/11/19 11:44:29	11.91888889	13.27444444	13.21111111	13.23111111	13.68666667	13.66444444	12.70111111	12.99555556	14.24444444	13.63666667	14.19777778	13.23333333	12.99222222	13.67222222	13.15777778	13.51777778	13.90555556	13.07111111	14.25222222	13.14	13.60888889	13.18666667	13.15	13.40555556	13.33222222	13.53555556	13.81333333	13.04222222	13.22888889	13.80888889	13.62333333	13.74222222	12.65333333	13.24666667	12.01555556	12.15222222	11.43888889	13.01444444	12.41888889	13.61222222	11.82	12.52333333	12.62888889	12.89444444	12.34222222
8/11/19 11:43:31	-118.5134285	42.54328873	1220.4817	8/11/19 11:44:30	16.89444444	18.34333333	18.13222222	17.98444444	18.53777778	18.63555556	17.85777778	18.02333333	19.35555556	18.75444444	19.32333333	18.52	18.08777778	18.82111111	18.36444444	18.62	18.91333333	18.14666667	19.27666667	18.16111111	18.59222222	17.98555556	18.05555556	18.33666667	18.12888889	18.41111111	18.56	18.00888889	18.12222222	18.70555556	18.42	18.53777778	17.40777778	18.00777778	17.03777778	16.72888889	16.00333333	17.45555556	17.14333333	18.16444444	15.96	16.78222222	16.92555556	17.27888889	16.65777778
8/11/19 11:43:32	-118.5134291	42.54328909	1220.161684	8/11/19 11:44:31	16.92555556	18.29777778	18.18666667	18.23222222	18.73666667	18.99222222	18.06888889	18.27222222	19.68	19.17555556	19.78111111	18.9	18.49666667	19.32555556	18.74777778	19.14777778	19.38666667	18.60111111	19.73333333	18.62	19.13888889	18.51777778	18.57222222	18.78222222	18.70555556	18.88222222	19.02777778	18.36777778	18.36777778	18.86555556	18.64888889	18.82222222	17.55444444	17.87	16.87333333	16.62222222	15.72222222	17.59111111	17.07444444	18.33777778	15.90888889	16.90222222	17.04333333	17.36111111	16.83
8/11/19 11:43:33	-118.5134292	42.54328936	1219.863974	8/11/19 11:44:32	8.354444444	9.856666667	9.848888889	9.525555556	10.05222222	10.10333333	9.13	9.427777778	10.74222222	10.19333333	10.75444444	9.835555556	9.536666667	10.30444444	9.704444444	10.08444444	10.48888889	9.591111111	10.97111111	9.715555556	10.10444444	9.671111111	9.735555556	9.941111111	9.78	10.06333333	10.15333333	9.533333333	9.668888889	10.17888889	10.02	10.04888889	9.034444444	9.595555556	8.671111111	8.424444444	7.715555556	9.182222222	8.776666667	10.07666667	8.044444444	8.791111111	9.116666667	9.503333333	8.951111111
8/11/19 11:43:34	-118.5134287	42.54328938	1219.647753	8/11/19 11:44:33	7.303333333	8.696666667	8.745555556	8.606666667	9.054444444	9.062222222	8.036666667	8.375555556	9.501111111	9.024444444	9.553333333	8.575555556	8.32	9.013333333	8.613333333	8.823333333	9.362222222	8.396666667	9.587777778	8.501111111	8.84	8.323333333	8.405555556	8.543333333	8.558888889	8.811111111	8.853333333	8.175555556	8.485555556	8.877777778	8.67	8.96	7.888888889	8.361111111	7.34	7.45	6.48	8.176666667	7.694444444	8.97	6.985555556	7.678888889	7.987777778	8.364444444	7.756666667
8/11/19 11:43:35	-118.5134271	42.54328901	1219.476568	8/11/19 11:44:34	6.725555556	7.898888889	7.744444444	7.694444444	8.312222222	8.286666667	7.324444444	7.751111111	8.817777778	8.278888889	8.931111111	7.878888889	7.576666667	8.372222222	7.773333333	8.06	8.451111111	7.615555556	8.934444444	7.754444444	8.18	7.695555556	7.682222222	7.931111111	7.723333333	8.025555556	8.178888889	7.615555556	7.72	8.124444444	7.948888889	8.226666667	7.068888889	7.371111111	6.525555556	6.543333333	5.806666667	7.295555556	6.715555556	8.215555556	6.105555556	6.952222222	7.27	7.674444444	7.038888889
8/11/19 11:43:36	-118.5134251	42.54328926	1219.465726	8/11/19 11:44:35	6.013333333	7.351111111	7.157777778	7.304444444	7.857777778	7.77	6.758888889	7.082222222	8.29	7.747777778	8.302222222	7.274444444	7.086666667	7.702222222	7.246666667	7.453333333	7.95	7.028888889	8.392222222	7.151111111	7.491111111	7.202222222	7.094444444	7.307777778	7.216666667	7.524444444	7.61	7.013333333	7.174444444	7.702222222	7.458888889	7.64	6.522222222	6.953333333	5.754444444	6.047777778	5.171111111	6.875555556	6.262222222	7.365555556	5.664444444	6.347777778	6.611111111	6.928888889	6.443333333
8/11/19 11:43:37	-118.5134241	42.54328989	1219.379416	8/11/19 11:44:36	5.726666667	6.933333333	6.743333333	6.875555556	7.34	7.257777778	6.358888889	6.606666667	7.806666667	7.374444444	7.892222222	6.741111111	6.614444444	7.34	6.906666667	7.033333333	7.492222222	6.768888889	8.031111111	6.83	7.25	6.771111111	6.791111111	6.974444444	6.77	7.058888889	7.246666667	6.618888889	6.733333333	7.335555556	7.087777778	7.382222222	6.14	6.694444444	5.398888889	5.511111111	4.946666667	6.303333333	6.032222222	7.296666667	5.136666667	5.941111111	6.264444444	6.663333333	6.214444444
8/11/19 11:43:38	-118.513424	42.54329048	1219.187187	8/11/19 11:44:37	14.50222222	15.75777778	15.48555556	15.53666667	16.03222222	16.17777778	15.20888889	15.52	16.80222222	16.34555556	16.87888889	15.86	15.51333333	16.22666667	15.74	15.99	16.30555556	15.51111111	16.72555556	15.61444444	15.91888889	15.44	15.46888889	15.61333333	15.59444444	15.81111111	15.97444444	15.35	15.53888889	16.06777778	15.65111111	15.83555556	14.59222222	15.35555556	14.36333333	14.43	13.54333333	14.94555556	14.37111111	15.70111111	13.58555556	14.24555556	14.49888889	14.81	14.15
8/11/19 11:43:39	-118.5134235	42.54329187	1218.980263	8/11/19 11:44:38	15.73888889	16.90888889	16.80888889	16.76888889	17.24444444	17.36666667	16.38666667	16.70111111	17.95444444	17.35777778	17.96444444	16.97333333	16.66555556	17.26666667	16.83777778	17.14333333	17.45555556	16.55888889	17.80333333	16.65111111	17.05555556	16.46333333	16.59	16.72222222	16.64222222	16.92666667	16.98333333	16.31222222	16.50333333	16.98444444	16.85	16.87111111	15.81555556	16.38111111	15.53333333	15.56111111	14.92555556	16.09888889	15.78888889	16.96333333	15.04222222	15.51	15.51222222	15.89555556	15.18444444
8/11/19 11:43:40	-118.5134249	42.54329092	1218.706145	8/11/19 11:44:39	0.053333333	1.241111111	1.24	1.246666667	2.025555556	2.053333333	1.006666667	1.536666667	2.535555556	2.098888889	2.647777778	1.671111111	1.322222222	2.148888889	1.766666667	2.011111111	2.358888889	1.567777778	2.853333333	1.716666667	2.111111111	1.643333333	1.842222222	1.835555556	1.828888889	2.177777778	2.198888889	1.7	1.8	2.36	2.048888889	2.422222222	1.213333333	1.941111111	1.218888889	0.983333333	0.224444444	1.902222222	1.128888889	2.264444444	0.27	1.143333333	1.414444444	1.798888889	1.284444444
8/11/19 11:43:41	-118.5134254	42.54329088	1218.559061	8/11/19 11:44:40	-1.903333333	-0.416666667	-0.456666667	-0.553333333	0.05	-0.017777778	-0.905555556	-0.634444444	0.59	0.005555556	0.544444444	-0.515555556	-0.682222222	0.141111111	-0.38	-0.046666667	0.327777778	-0.576666667	0.836666667	-0.438888889	0.123333333	-0.453333333	-0.253333333	-0.136666667	-0.185555556	0.145555556	0.257777778	-0.39	-0.147777778	0.378888889	0.234444444	0.635555556	-0.568888889	0.042222222	-0.904444444	-0.747777778	-1.722222222	-0.021111111	-0.696666667	0.66	-1.318888889	-0.55	-0.293333333	-0.005555556	-0.561111111
[truncated: 96 more columns]
