# Supplementary material
Source: MDPI journal article supplement (https://www.mdpi.com/2072-4292/13/5/1035)
Supplement: s1 [file s1 › supporting_data/fly031sec-ahs5-matched.csv]

datetime	gps_long	gps_lat	gps_elev	rtk_long_p	rtk_lat_p	rtk_elev_masl_p	rtk_lon_s	rtk_lat_s	rtk_elev_s	Datetime	940.046	946.742	953.407	960.04	966.642	973.214	979.755	986.266	992.747	999.199	1005.621	1012.015	1018.38	1024.718	1031.027	1037.309	1043.564	1049.792	1055.994	1062.169	1068.319	1074.443	1080.542	1086.616	1092.666	1098.692	1104.694	1110.672	1116.627	1122.559	1128.469	1134.357	1140.223	1146.067	1151.89	1157.693	1163.475	1169.236	1174.978
8/11/2019 11:53:21	-118.513425	42.5432924	1221.542	-118.5134247	42.543292	1218.629013	-118.5134295	42.54328798	1220.588867	8/11/2019 11:54:20	19.03222222	18.42444444	18.36888889	18.61222222	18.46555556	18.18222222	18.63777778	18.27666667	17.88111111	17.98	18.21555556	18.21444444	18.37333333	18.13555556	18.06555556	18.05444444	17.71444444	18.08222222	17.61111111	17.95555556	17.59777778	17.82666667	17.91111111	17.66111111	17.73444444	17.75444444	17.31222222	17.61888889	17.44333333	17.28666667	17.65222222	17.02111111	17.38555556	17.27444444	17.91	16.94444444	17.72	17.32333333	17.47666667
8/11/2019 11:53:22	-118.5134229	42.54329317	1221.970323	-118.5134229	42.54329285	1219.036565	-118.5134275	42.54328864	1220.91971	8/11/2019 11:54:21	16.39888889	15.56	15.71555556	15.89222222	15.77111111	15.45333333	15.83111111	15.55222222	15.00777778	15.19777778	15.37333333	15.47333333	15.64777778	15.43777778	15.33333333	15.34333333	15.06666667	15.28111111	14.9	15.28111111	14.96555556	15.12555556	15.14222222	14.91555556	14.94888889	14.97222222	14.62222222	15.00222222	14.77888889	14.63222222	14.89777778	14.25111111	14.60888889	14.35222222	15.31222222	14.14333333	15.07555556	14.66777778	14.65222222
8/11/2019 11:53:23	-118.5134313	42.54329575	1222.541387	-118.5134309	42.54329547	1219.507761	-118.5134322	42.54329034	1221.656032	8/11/2019 11:54:22	17.16	16.44444444	16.28222222	16.38888889	16.40555556	15.96444444	16.48666667	16.00888889	15.65333333	15.80444444	16	16.05111111	16.14333333	15.96444444	15.92777778	15.86666667	15.59444444	15.95222222	15.47111111	15.82	15.44333333	15.74111111	15.72333333	15.56888889	15.69333333	15.55666667	15.23222222	15.41111111	15.48	15.21222222	15.46333333	14.85111111	15.17555556	15.21888889	16.07666667	14.66888889	15.70666667	15.11111111	15.39333333
8/11/2019 11:53:24	-118.5134334	42.54329689	1223.552452	-118.513433	42.54329662	1220.462874	-118.5134347	42.54329156	1222.795581	8/11/2019 11:54:23	17.08	16.23	16.40444444	16.53333333	16.42666667	16.02222222	16.55666667	16.10777778	15.70222222	15.81333333	16.04777778	16.09444444	16.22111111	16.05666667	15.95666667	15.90111111	15.57444444	15.94111111	15.59666667	15.86444444	15.53333333	15.77444444	15.79222222	15.55222222	15.61555556	15.62444444	15.28444444	15.63333333	15.46666667	15.19444444	15.58111111	14.92222222	15.45666667	15.24	15.86888889	14.76666667	15.95555556	15.16333333	15.35333333
8/11/2019 11:53:25	-118.5134333	42.54329732	1224.6498	-118.5134324	42.5432969	1221.50544	-118.5134345	42.543292	1223.7692	8/11/2019 11:54:24	17.80222222	17.31888889	17.18444444	17.23666667	17.21666667	16.88333333	17.25	16.84	16.55555556	16.65222222	16.75777778	16.9	16.95777778	16.73	16.76	16.67	16.36666667	16.81777778	16.32	16.60111111	16.30888889	16.52777778	16.51222222	16.39666667	16.42777778	16.40777778	16.09	16.43666667	16.17666667	16.14888889	16.38	15.78333333	16.15333333	15.94555556	16.73555556	15.65777778	16.56222222	15.97555556	16.24
8/11/2019 11:53:26	-118.5134336	42.54329809	1226.703677	-118.5134324	42.54329757	1223.466845	-118.5134346	42.54329285	1225.667323	8/11/2019 11:54:25	17.984	17.329	17.462	17.49	17.469	17.171	17.624	17.18	16.739	16.901	17.095	17.179	17.295	17.114	16.963	16.972	16.685	17.068	16.633	16.923	16.532	16.702	16.889	16.621	16.696	16.673	16.273	16.653	16.48	16.31	16.666	15.962	16.495	16.165	17.037	15.79	16.831	16.168	16.497
8/11/2019 11:53:27	-118.5134346	42.54329836	1228.843484	-118.513433	42.54329788	1225.561352	-118.5134356	42.54329336	1227.911097	8/11/2019 11:54:26	18.32	17.62111111	17.62	17.82222222	17.67777778	17.29888889	17.82888889	17.38333333	17.00333333	17.12555556	17.32	17.35444444	17.47777778	17.31444444	17.26777778	17.11888889	16.8	17.27555556	16.84444444	17.09666667	16.75777778	16.99444444	17.08777778	16.86333333	16.93	16.79222222	16.52	16.77444444	16.68666667	16.52888889	16.85777778	16.25222222	16.61	16.68222222	17.20666667	16.06111111	16.86666667	16.36555556	16.63555556
8/11/2019 11:53:28	-118.5134346	42.5432984	1230.698903	-118.5134327	42.5432979	1227.347148	-118.5134356	42.54329352	1229.725355	8/11/2019 11:54:27	18.32777778	17.54444444	17.71222222	17.85555556	17.62777778	17.40666667	17.81111111	17.39111111	16.98666667	17.17333333	17.47	17.47	17.55888889	17.36888889	17.32888889	17.22333333	16.91888889	17.34555556	16.89333333	17.23111111	16.89555556	16.99777778	17.09444444	16.88555556	16.97222222	17.02777778	16.57222222	16.92333333	16.73	16.66	16.85333333	16.15666667	16.73555556	16.61666667	17.37111111	15.85555556	16.82777778	16.48888889	16.77666667
8/11/2019 11:53:29	-118.5134345	42.54329832	1232.4692	-118.5134323	42.54329785	1229.04116	-118.5134353	42.5432936	1231.4246	8/11/2019 11:54:28	18.55777778	18.04888889	18.10666667	18.28222222	17.99444444	17.78555556	18.3	17.86888889	17.36111111	17.48444444	17.67222222	17.79111111	17.98111111	17.67888889	17.63444444	17.62111111	17.27777778	17.55333333	17.10222222	17.56111111	17.14222222	17.39777778	17.34	17.14333333	17.25222222	17.18555556	16.88333333	17.24111111	17.02	16.82333333	17.12	16.50888889	16.96111111	16.77888889	17.40444444	16.27333333	17.23666667	16.68666667	16.99666667
8/11/2019 11:53:30	-118.5134346	42.543298	1234.189774	-118.5134319	42.54329763	1230.725577	-118.513435	42.54329342	1233.090839	8/11/2019 11:54:29	18.79555556	17.94222222	17.97444444	17.99888889	17.91888889	17.61333333	18.21222222	17.76555556	17.25	17.34888889	17.70333333	17.79777778	17.79777778	17.63777778	17.54888889	17.49888889	17.13333333	17.53777778	17.07222222	17.44111111	17.03777778	17.37	17.32111111	17.18111111	17.18222222	17.28444444	16.76666667	17.10222222	16.95666667	16.83222222	17.14777778	16.41	16.93333333	16.80555556	17.48777778	16.36333333	17.26	16.45333333	17.02333333
8/11/2019 11:53:31	-118.5134349	42.54329766	1236.196774	-118.5134318	42.54329738	1232.664784	-118.5134349	42.54329322	1234.961226	8/11/2019 11:54:30	18.60888889	17.93333333	17.71222222	17.95666667	17.79	17.42333333	18.00111111	17.61333333	17.13555556	17.31888889	17.59555556	17.62	17.60444444	17.46666667	17.37666667	17.44666667	17.08111111	17.42	16.92222222	17.32	16.94	17.11	17.2	16.98111111	17.03666667	17.05	16.64333333	17.04111111	16.81333333	16.73222222	16.94777778	16.32666667	16.78777778	16.63222222	17.37	16.01888889	17.26111111	16.37111111	17.01
8/11/2019 11:53:32	-118.5134352	42.54329724	1237.976871	-118.5134315	42.54329685	1234.400516	-118.513435	42.54329286	1236.595032	8/11/2019 11:54:31	18.64	17.75888889	17.92666667	18.01111111	17.93666667	17.53333333	18.07555556	17.56333333	17.19666667	17.30555556	17.51777778	17.62111111	17.79222222	17.45333333	17.47111111	17.39777778	17.09888889	17.47444444	17.08444444	17.32777778	16.98888889	17.25111111	17.29	17.02888889	17.07333333	17.09222222	16.75	16.97444444	16.89333333	16.59555556	17.04888889	16.36666667	16.97444444	16.72444444	17.60888889	16.06	17.05666667	16.50555556	17.04222222
8/11/2019 11:53:33	-118.513435	42.54329726	1238.27271	-118.5134308	42.5432967	1234.722074	-118.5134346	42.54329269	1236.816742	8/11/2019 11:54:32	19.01333333	18.15666667	18.14666667	18.41	18.32555556	17.85777778	18.52666667	18.06777778	17.51	17.71	17.82	17.95888889	18.14222222	17.87222222	17.80888889	17.81111111	17.33222222	17.69111111	17.28888889	17.63111111	17.32222222	17.58222222	17.58222222	17.40666667	17.43666667	17.42555556	17.03222222	17.39666667	17.25	17.04777778	17.36111111	16.73222222	17.25111111	17.26888889	17.85777778	16.22333333	17.91	16.99222222	17.31666667
8/11/2019 11:53:34	-118.5134352	42.54329708	1238.3375	-118.5134307	42.54329665	1234.736575	-118.5134349	42.54329265	1236.955	8/11/2019 11:54:33	17.91555556	17.33777778	17.41111111	17.50888889	17.26222222	16.84777778	17.60888889	17.06333333	16.66666667	16.80444444	16.95	17.08111111	17.15555556	17.07222222	17.04111111	16.85444444	16.55222222	16.93111111	16.39222222	16.72777778	16.41111111	16.60222222	16.68444444	16.4	16.48777778	16.42888889	16.17666667	16.47444444	16.31	16.12111111	16.42888889	15.69111111	16.25555556	16.36666667	16.72666667	15.60888889	16.51666667	15.97333333	16.49555556
8/11/2019 11:53:35	-118.513436	42.54329711	1238.400649	-118.5134313	42.54329697	1234.803876	-118.5134383	42.54329339	1236.857838	8/11/2019 11:54:34	18.55222222	17.69	17.79444444	17.88444444	17.69	17.34444444	17.91888889	17.42666667	16.95333333	17.19888889	17.34111111	17.34666667	17.51555556	17.33	17.29333333	17.20444444	16.84333333	17.23777778	16.77333333	17.13	16.72444444	16.98777778	17.00888889	16.80888889	16.85555556	16.87222222	16.51111111	16.87222222	16.66333333	16.43666667	16.77888889	16.14444444	16.72888889	16.53333333	17.20666667	16.07666667	16.88444444	16.44222222	16.97
8/11/2019 11:53:36	-118.5134413	42.54329896	1238.344516	-118.5134365	42.54329894	1234.735771	-118.5134469	42.54329586	1236.621806	8/11/2019 11:54:35	18.40111111	17.52666667	17.80666667	17.77555556	17.77666667	17.45333333	17.99111111	17.39222222	17.03888889	17.26222222	17.33444444	17.43333333	17.55777778	17.36666667	17.24666667	17.25	16.98555556	17.28111111	16.82222222	17.19222222	16.78888889	17.02111111	17.08777778	16.88111111	16.89777778	16.89	16.52222222	16.83888889	16.79666667	16.51555556	16.83666667	16.15222222	16.81111111	16.54	17.41444444	15.84666667	17.06555556	16.47333333	17.01666667
8/11/2019 11:53:37	-118.5134497	42.54330176	1238.29329	-118.5134446	42.54330176	1234.662877	-118.5134584	42.54329981	1236.197	8/11/2019 11:54:36	18.607	17.963	18.106	17.966	17.924	17.529	18.054	17.66	17.184	17.374	17.552	17.498	17.696	17.581	17.464	17.389	17.096	17.477	17.014	17.418	16.932	17.257	17.291	17.014	17.109	17.027	16.769	17.171	16.897	16.693	16.89	16.33	16.913	16.734	17.415	16.299	17.375	16.699	16.989
8/11/2019 11:53:38	-118.5134603	42.54330494	1238.3258	-118.513455	42.54330492	1234.658507	-118.5134692	42.54330339	1235.957233	8/11/2019 11:54:37	18.53333333	17.79777778	17.80444444	17.85555556	17.77888889	17.37222222	17.96333333	17.49444444	17.04333333	17.24666667	17.44333333	17.52	17.55	17.34444444	17.39333333	17.33333333	16.93666667	17.33	16.92	17.27777778	16.89888889	17.13777778	17.17888889	16.85333333	16.97555556	16.92444444	16.67333333	17.02555556	16.89	16.58333333	16.98333333	16.29111111	16.83888889	16.61111111	17.30222222	16.2	17.21222222	16.55888889	16.59333333
8/11/2019 11:53:39	-118.5134728	42.54330968	1238.370452	-118.5134677	42.54330988	1234.64871	-118.513479	42.54330766	1235.899323	8/11/2019 11:54:38	17.44666667	16.75333333	16.71111111	16.73444444	16.69666667	16.27333333	16.84555556	16.40333333	15.97555556	16.12111111	16.29222222	16.34888889	16.42333333	16.25777778	16.23555556	16.13222222	15.88111111	16.18777778	15.81666667	16.11333333	15.65555556	15.95888889	16.00666667	15.73777778	15.84333333	15.85444444	15.39666667	15.85777778	15.62666667	15.51666667	15.84222222	15.14111111	15.70666667	15.45666667	16.45444444	14.83333333	16.16555556	15.42444444	15.66
8/11/2019 11:53:40	-118.5134906	42.54332062	1238.384677	-118.5134858	42.54332094	1234.661887	-118.5134934	42.54331779	1235.993839	8/11/2019 11:54:39	17.74	16.99666667	17.02	17.09777778	16.95555556	16.64777778	17.3	16.74555556	16.24777778	16.49777778	16.66111111	16.68777778	16.83444444	16.65111111	16.62888889	16.53111111	16.16111111	16.58333333	16.10666667	16.50222222	16.06444444	16.33111111	16.35333333	16.16777778	16.25222222	16.21444444	15.87777778	16.22333333	15.96333333	15.79888889	16.21666667	15.42444444	16.01222222	15.96555556	16.53777778	15.26555556	16.36777778	15.77	16.15111111
8/11/2019 11:53:41	-118.5135135	42.54333568	1238.331903	-118.5135086	42.54333596	1234.611513	-118.5135165	42.54333335	1236.000806	8/11/2019 11:54:40	17.29666667	16.46333333	16.73888889	16.74	16.62777778	16.19444444	16.74888889	16.31888889	15.76222222	16.00777778	16.25444444	16.29	16.35666667	16.20111111	16.10666667	16.04555556	15.73111111	16.09333333	15.67333333	15.97666667	15.65333333	15.90222222	15.93	15.68111111	15.79666667	15.75	15.29111111	15.73666667	15.57	15.27777778	15.58888889	15.03111111	15.49	15.48444444	16.25444444	15.01222222	15.92444444	15.36111111	15.58777778
8/11/2019 11:53:42	-118.5135385	42.54335034	1238.2498	-118.5135322	42.54335018	1234.57972	-118.5135394	42.54334698	1235.9722	8/11/2019 11:54:41	17.44777778	16.60777778	16.72333333	16.91111111	16.62666667	16.30333333	16.84	16.49444444	16.01222222	16.20222222	16.39555556	16.43888889	16.57	16.30111111	16.29222222	16.11555556	15.95	16.27222222	15.83888889	16.10777778	15.69777778	15.98111111	16.07111111	15.82777778	15.86333333	15.91222222	15.45888889	15.86555556	15.67333333	15.43333333	15.61	15.23777778	15.71777778	15.53333333	16.46	15.07777778	15.92444444	15.37222222	15.72666667
8/11/2019 11:53:43	-118.5135637	42.54336328	1238.001387	-118.5135578	42.5433636	1234.416397	-118.5135595	42.54335561	1235.836065	8/11/2019 11:54:42	17.69111111	16.90333333	16.98111111	16.89555556	16.86444444	16.44333333	17.03555556	16.63	16.09333333	16.35	16.52888889	16.49333333	16.71222222	16.41222222	16.38888889	16.35111111	15.97222222	16.40222222	15.90555556	16.28444444	15.85	16.18555556	16.21555556	15.88555556	16.02555556	16.04333333	15.64	16.03333333	15.77	15.55777778	15.98888889	15.32	15.81333333	15.79222222	16.40222222	15.23333333	16.34444444	15.78777778	15.92888889
8/11/2019 11:53:44	-118.5135894	42.54337521	1237.929355	-118.5135833	42.54337548	1234.384626	-118.5135845	42.54336877	1235.821935	8/11/2019 11:54:43	17.50444444	16.85111111	16.81777778	16.91111111	16.87444444	16.40777778	16.93333333	16.62111111	16.10222222	16.26777778	16.51111111	16.5	16.70333333	16.45777778	16.40777778	16.35444444	15.99888889	16.43111111	15.97	16.3	15.97555556	16.23777778	16.19222222	15.99777778	16.14222222	16.02222222	15.68555556	16.13555556	15.87666667	15.72777778	16.03333333	15.37	15.84444444	15.72888889	16.57333333	15.39777778	16.25111111	15.72222222	16.09
8/11/2019 11:53:45	-118.5136137	42.54338556	1237.880935	-118.5136076	42.54338566	1234.3839	-118.5135995	42.54337947	1236.06771	8/11/2019 11:54:44	19.37555556	18.71111111	18.62333333	18.85444444	18.52444444	18.23555556	18.85222222	18.38333333	17.95	18.15	18.40222222	18.44444444	18.56222222	18.32444444	18.27777778	18.22333333	17.94333333	18.39777778	18.02888889	18.36555556	17.9	18.16555556	18.16444444	17.97666667	18.11444444	18.04111111	17.67555556	17.92222222	17.95333333	17.76555556	18.05777778	17.50666667	18.09111111	17.84222222	18.50888889	17.00333333	18.36777778	17.45222222	18.00444444
8/11/2019 11:53:46	-118.5136384	42.54339467	1237.921645	-118.5136317	42.54339449	1234.397465	-118.513621	42.5433885	1236.360258	8/11/2019 11:54:45	21.81777778	21.05666667	21.02333333	21.06111111	20.96333333	20.63444444	21.27888889	20.75	20.29111111	20.46777778	20.68333333	20.77111111	20.93	20.71333333	20.60888889	20.59222222	20.36111111	20.64444444	20.30222222	20.65888889	20.26222222	20.51333333	20.56888889	20.41111111	20.38444444	20.43666667	20.11	20.39333333	20.29666667	20.14555556	20.39	19.82111111	20.33222222	20.00555556	20.66111111	19.25444444	20.35888889	19.95666667	20.39333333
8/11/2019 11:53:47	-118.513663	42.54340378	1237.9202	-118.5136559	42.54340329	1234.40494	-118.5136452	42.54339774	1236.629567	8/11/2019 11:54:46	19.28	18.40111111	18.46111111	18.45888889	18.40444444	17.98111111	18.60777778	18.20333333	17.74888889	17.90111111	18.08666667	18.16333333	18.39888889	18.15	18.06333333	18.04888889	17.75777778	18.20555556	17.72111111	18.02888889	17.72222222	18.01333333	18.02	17.82222222	17.86555556	17.70888889	17.50555556	17.82666667	17.64	17.52666667	17.87444444	17.28333333	17.78777778	17.57444444	18.21	16.98333333	18.19777778	17.61333333	17.97777778
8/11/2019 11:53:48	-118.5136888	42.54341263	1237.893903	-118.5136818	42.54341213	1234.4114	-118.5136711	42.54340697	1236.853581	8/11/2019 11:54:47	18.949	18.138	18.306	18.359	18.26	17.747	18.436	18.007	17.461	17.729	17.878	17.955	18.059	17.951	17.853	17.816	17.514	17.845	17.447	17.873	17.475	17.732	17.748	17.576	17.706	17.593	17.255	17.619	17.506	17.361	17.431	17.023	17.478	17.396	17.87	16.71	17.798	17.243	17.584
8/11/2019 11:53:49	-118.5137143	42.54342098	1237.843871	-118.5137076	42.54342054	1234.399681	-118.5136965	42.54341491	1237.03329	8/11/2019 11:54:48	19.18222222	18.46555556	18.61444444	18.82555556	18.64444444	18.22333333	18.69	18.43333333	18.06666667	18.21333333	18.36666667	18.45888889	18.60888889	18.31777778	18.32	18.27	17.90888889	18.38666667	17.87444444	18.38666667	17.84222222	18.31	18.26333333	18.00666667	18.12666667	18.06111111	17.80444444	18.11444444	17.88333333	17.75666667	18.06555556	17.44444444	17.99333333	17.92555556	18.55333333	17.18333333	18.19	17.79666667	18.09666667
8/11/2019 11:53:50	-118.5137358	42.5434284	1237.77325	-118.5137289	42.54342784	1234.380225	-118.5137184	42.543422	1237.16425	8/11/2019 11:54:49	20.03666667	19.34888889	19.33777778	19.53	19.35	19.00555556	19.61777778	19.22777778	18.8	18.88	19.10111111	19.12222222	19.37666667	19.16	19.18111111	19.03111111	18.69777778	19.14111111	18.70777778	19.18777778	18.77777778	18.92444444	19.02444444	18.82666667	18.82777778	18.84	18.56888889	18.87888889	18.75333333	18.58	18.90555556	18.35777778	18.90444444	18.80666667	19.28	17.94555556	19.06888889	18.66	18.95
8/11/2019 11:53:51	-118.5137592	42.54343602	1237.763162	-118.5137519	42.54343531	1234.377043	-118.5137505	42.5434248	1237.338108	8/11/2019 11:54:50	19.99888889	19.24666667	19.23	19.26777778	19.29333333	18.96222222	19.53888889	19.10555556	18.59777778	18.87222222	19.09	19.16777778	19.18777778	19.04333333	18.97222222	18.97666667	18.67222222	19.05222222	18.63222222	19.05555556	18.72333333	18.91222222	18.94555556	18.76111111	18.81777778	18.81333333	18.49777778	18.81	18.61333333	18.57333333	18.93777778	18.20666667	18.69888889	18.59888889	19.27222222	18.2	18.99111111	18.61333333	18.94333333
8/11/2019 11:53:52	-118.5137854	42.54344424	1237.731806	-118.5137782	42.54344353	1234.329668	-118.513808	42.54342608	1237.456903	8/11/2019 11:54:51	19.05777778	18.26444444	18.27111111	18.52222222	18.27333333	18.06888889	18.49888889	18.17444444	17.63666667	17.93222222	18.07	18.14	18.31888889	18.10888889	18.12444444	18.02666667	17.70111111	18.06444444	17.70888889	18.04666667	17.68333333	17.89222222	18.02555556	17.81111111	17.82888889	17.80333333	17.46666667	17.75888889	17.77666667	17.54222222	17.81666667	17.14777778	17.68	17.54111111	18.41444444	16.86333333	17.94888889	17.62111111	17.83
8/11/2019 11:53:53	-118.5138094	42.5434515	1237.705903	-118.5138022	42.54345097	1234.302548	-118.5138251	42.54344594	1237.329161	8/11/2019 11:54:52	19.05111111	18.33444444	18.55444444	18.47333333	18.45111111	18.10666667	18.59444444	18.12222222	17.81777778	17.95555556	18.20222222	18.17222222	18.38888889	18.09666667	18.12	17.98888889	17.70333333	18.05111111	17.69111111	18	17.72444444	17.97444444	18.03888889	17.76777778	17.89444444	17.84	17.52	17.87222222	17.66333333	17.56111111	17.81111111	17.15444444	17.74666667	17.58222222	18.48333333	17.00111111	17.89333333	17.36444444	17.90444444
8/11/2019 11:53:54	-118.5138334	42.54345866	1237.693677	-118.5138257	42.54345812	1234.302516	-118.5138141	42.54345551	1237.063097	8/11/2019 11:54:53	20.8	20.20666667	20.23555556	20.25	20.14555556	19.96777778	20.51888889	20.06666667	19.62888889	19.84444444	19.99333333	20.11333333	20.24222222	20.04444444	20.04666667	19.97	19.63555556	19.99555556	19.62555556	20.00666667	19.53888889	19.83888889	19.89666667	19.59333333	19.65	19.75	19.39888889	19.72888889	19.62333333	19.46111111	19.71666667	19.02555556	19.71555556	19.38777778	20.08	18.74	19.94111111	19.29777778	19.62555556
8/11/2019 11:53:55	-118.5138572	42.54346584	1237.6864	-118.5138485	42.54346494	1234.31996	-118.5138187	42.54346162	1236.865	8/11/2019 11:54:54	21.88	21.09555556	20.91555556	21.08333333	20.97333333	20.63555556	21.24	20.84666667	20.23111111	20.52444444	20.68888889	20.88666667	20.98333333	20.75444444	20.72333333	20.58333333	20.32777778	20.75555556	20.26111111	20.68777778	20.23111111	20.51111111	20.56444444	20.44666667	20.52	20.48111111	20.08666667	20.45555556	20.31333333	20.12111111	20.48	19.89777778	20.24111111	20.02	20.96	19.57555556	20.73333333	20.01555556	20.51444444
8/11/2019 11:53:56	-118.5138788	42.54347246	1237.6808	-118.5138713	42.54347181	1234.331144	-118.5138397	42.54348095	1236.67368	8/11/2019 11:54:55	22.49111111	21.69333333	21.81111111	21.81888889	21.63777778	21.42333333	21.91555556	21.47888889	20.95111111	21.19	21.46888889	21.49111111	21.58222222	21.48444444	21.36333333	21.33222222	21.11222222	21.46777778	20.95777778	21.39333333	20.98777778	21.24222222	21.26555556	21.14333333	21.12777778	21.13555556	20.78555556	21.15777778	20.99666667	20.79555556	21.16333333	20.52555556	21.15777778	21.09444444	21.77555556	20.45222222	21.28666667	20.81888889	21.08333333
8/11/2019 11:53:57	-118.5139045	42.54348071	1237.724757	-118.513897	42.54348002	1234.371868	-118.5138745	42.5435075	1236.559324	8/11/2019 11:54:56	23.19111111	22.51333333	22.54111111	22.82	22.73111111	22.28666667	22.82111111	22.35	21.86111111	22.13666667	22.40777778	22.46222222	22.49888889	22.27666667	22.18	22.24777778	21.89555556	22.28666667	21.82111111	22.27444444	21.91	22.13222222	22.13777778	21.94777778	22.13	21.97	21.65666667	22.05	21.79333333	21.74666667	21.97555556	21.43222222	21.99777778	21.66222222	22.12888889	21.29777778	21.97222222	21.53333333	22.01444444
8/11/2019 11:53:58	-118.5139344	42.5434899	1237.766774	-118.5139271	42.54348945	1234.372168	-118.5139371	42.54351683	1236.641871	8/11/2019 11:54:57	25.53111111	24.91333333	24.80333333	24.87777778	24.82888889	24.29333333	24.83444444	24.56777778	23.98666667	24.14888889	24.45777778	24.38444444	24.57222222	24.31666667	24.33222222	24.24444444	23.90777778	24.28111111	23.88666667	24.28888889	23.84	24.10333333	24.19111111	24.00111111	24.02111111	23.89888889	23.56555556	23.93111111	23.85333333	23.75111111	24.04666667	23.36	24.00666667	23.64333333	24.49555556	23.24888889	24.04	23.53	24.05666667
8/11/2019 11:53:59	-118.5139639	42.54349967	1237.747419	-118.5139563	42.54349928	1234.318313	-118.5139769	42.54351864	1236.623226	8/11/2019 11:54:58	29.366	28.621	28.631	28.718	28.648	28.01	28.69	28.241	27.703	27.895	28.071	28.343	28.34	28.012	28.187	27.981	27.697	28.162	27.508	28.07	27.475	27.789	27.669	27.511	27.571	27.552	27.104	27.466	27.372	27.158	27.441	26.917	27.393	27.444	27.97	26.837	27.676	27.114	27.583
8/11/2019 11:54:00	-118.513995	42.5435104	1237.723	-118.513987	42.54351006	1234.259197	-118.5139933	42.54351791	1236.534433	8/11/2019 11:54:59	29.11333333	28.46666667	28.57333333	28.35222222	28.45777778	27.99888889	28.60555556	28.18333333	27.58222222	27.82	27.95888889	28.17888889	28.24888889	28.01444444	28.04333333	27.95666667	27.50777778	28.10888889	27.46333333	27.98	27.36666667	27.72	27.66	27.51444444	27.53222222	27.42555556	27.11777778	27.39333333	27.37666667	27.14666667	27.44333333	26.95888889	27.33333333	27.06444444	27.61444444	26.41111111	27.29666667	27.14	27.57
8/11/2019 11:54:01	-118.5140278	42.54352144	1237.743194	-118.5140196	42.54352128	1234.262503	-118.5140317	42.54352786	1236.499871	8/11/2019 11:55:00	27.34777778	26.73555556	26.81888889	26.72777778	26.72777778	26.28777778	26.79333333	26.54	25.91111111	26.19333333	26.39777778	26.5	26.55888889	26.37444444	26.27888889	26.28555556	25.85555556	26.34222222	25.82	26.25666667	25.81444444	26.10888889	26.10111111	25.95777778	26.01444444	25.93222222	25.61888889	25.95555556	25.79666667	25.61333333	25.86888889	25.39111111	26.04111111	25.63555556	26.21	24.96777778	25.80222222	25.48666667	25.85555556
8/11/2019 11:54:02	-118.5140628	42.54353292	1237.823968	-118.5140545	42.54353306	1234.28841	-118.5140757	42.54353729	1236.521032	8/11/2019 11:55:01	24.92333333	24.01888889	24.23888889	24.28555556	24.08	23.71555556	24.32111111	23.94666667	23.44888889	23.58666667	23.86222222	23.91222222	24.06777778	23.76888889	23.73222222	23.73	23.42555556	23.79777778	23.34111111	23.72222222	23.32111111	23.53666667	23.67666667	23.44333333	23.46555556	23.43555556	23.14444444	23.47444444	23.20888889	23.19111111	23.44333333	22.84	23.27777778	22.90666667	23.8	22.71333333	23.25333333	23.02777778	23.40777778
8/11/2019 11:54:03	-118.514099	42.54354449	1237.885194	-118.5140888	42.54354443	1234.272529	-118.5140972	42.54354128	1236.645419	8/11/2019 11:55:02	20.88	20.09888889	20.08888889	19.85111111	19.99555556	19.56777778	20.15333333	19.68555556	19.22	19.39	19.61666667	19.71444444	19.81555556	19.69777778	19.57333333	19.53222222	19.24333333	19.66444444	19.18222222	19.56888889	19.25444444	19.52444444	19.57777778	19.28666667	19.31888889	19.35666667	19.02	19.31222222	19.19666667	19.04666667	19.41888889	18.80777778	19.29333333	19.22	19.90666667	18.69111111	19.66777778	18.84555556	19.45111111
8/11/2019 11:54:04	-118.5141356	42.54355659	1237.883871	-118.5141267	42.54355692	1234.257752	-118.5141274	42.54354703	1236.84571	8/11/2019 11:55:03	22.22777778	21.42111111	21.44333333	21.46666667	21.42333333	21.00666667	21.67555556	21.18555556	20.76777778	20.97	21.14888889	21.19	21.33555556	21.15	21.05333333	21.09555556	20.71444444	21.08555556	20.63111111	21.07888889	20.69222222	21.00111111	20.98888889	20.70333333	20.87222222	20.81777778	20.51333333	20.81	20.74666667	20.57666667	20.70111111	20.30111111	20.73777778	20.62555556	21.47777778	20.26333333	20.85777778	20.44111111	20.67
8/11/2019 11:54:05	-118.5141714	42.5435683	1237.8828	-118.5141622	42.54356844	1234.253493	-118.5141692	42.54355595	1236.991633	8/11/2019 11:55:04	19.30222222	18.35777778	18.30333333	18.57111111	18.31333333	18.08666667	18.58777778	18.17444444	17.67333333	17.82777778	18.10111111	18.18888889	18.24	18.09	17.97888889	17.96	17.56666667	17.98222222	17.57	17.92222222	17.52222222	17.85111111	17.89666667	17.63888889	17.76555556	17.74444444	17.29333333	17.75666667	17.56666667	17.32	17.64444444	17.12222222	17.47555556	17.33888889	18.21111111	17.06111111	18.15111111	17.56888889	17.84333333
8/11/2019 11:54:06	-118.5142069	42.5435803	1237.909742	-118.5141981	42.54358048	1234.275123	-118.5142138	42.54356673	1237.108839	8/11/2019 11:55:05	18.12777778	17.27333333	17.40888889	17.44888889	17.31444444	16.86666667	17.39666667	17.11	16.61777778	16.80333333	17.06888889	17.04777778	17.21333333	16.95444444	16.97777778	16.85333333	16.54555556	16.83888889	16.42555556	16.89444444	16.48888889	16.69777778	16.82333333	16.59555556	16.67111111	16.64555556	16.35333333	16.65333333	16.42333333	16.26777778	16.60444444	15.96888889	16.40555556	16.63222222	17.35333333	16.06111111	17.01111111	16.32	16.7
8/11/2019 11:54:07	-118.5142432	42.5435923	1237.961613	-118.5142346	42.54359263	1234.3092	-118.5142546	42.54357463	1237.240548	8/11/2019 11:55:06	16.85444444	15.92	15.82333333	16.01666667	15.86555556	15.47888889	16.06666667	15.68111111	15.11	15.35666667	15.52444444	15.62666667	15.76777778	15.55444444	15.40111111	15.40777778	15.08888889	15.42111111	15.02555556	15.43777778	15	15.26777778	15.25555556	15.12222222	15.08777778	15.18888889	14.73666667	15.15111111	15.04	14.78555556	14.99888889	14.40666667	14.89333333	14.79111111	15.40555556	14.36222222	15.66222222	14.91777778	14.99444444
8/11/2019 11:54:08	-118.514279	42.54360438	1237.974	-118.5142691	42.54360429	1234.346652	-118.5142751	42.5435683	1237.30771	8/11/2019 11:55:07	15.58555556	14.76	14.75333333	14.83777778	14.77	14.39333333	14.88333333	14.48444444	14.14666667	14.09888889	14.35222222	14.45444444	14.49222222	14.28444444	14.29111111	14.13888889	13.81555556	14.27222222	13.73666667	14.12111111	13.73555556	14.02666667	13.99111111	13.78333333	13.93666667	13.93888889	13.47111111	13.91888889	13.69333333	13.57	13.90777778	13.09888889	13.67111111	13.49555556	14.77111111	13.37333333	14.48222222	13.53777778	13.93
8/11/2019 11:54:09	-118.5143142	42.54361627	1237.974452	-118.5143056	42.5436166	1234.365723	-118.514319	42.54357574	1237.255355	8/11/2019 11:55:08	15.16777778	14.62111111	14.47444444	14.70555556	14.58444444	14.18888889	14.74	14.35111111	13.78	13.96444444	14.16222222	14.26666667	14.34222222	14.13111111	14.08555556	13.83444444	13.63666667	13.95555556	13.55555556	13.86111111	13.51777778	13.84	13.79888889	13.66444444	13.67444444	13.68888889	13.29666667	13.71777778	13.43888889	13.3	13.59	13.04222222	13.50777778	13.51111111	14.52444444	13.14333333	14.1	13.39777778	13.92222222
8/11/2019 11:54:10	-118.5143476	42.54362782	1237.994	-118.5143391	42.54362792	1234.38544	-118.5143581	42.54361442	1237.055033	8/11/2019 11:55:09	16.10888889	15.18111111	15.27777778	15.34888889	15.23222222	14.95111111	15.38777778	14.96444444	14.62555556	14.74444444	14.83	14.90777778	14.95	14.75777778	14.75777778	14.68666667	14.37111111	14.67	14.19555556	14.61444444	14.28555556	14.40333333	14.54555556	14.23666667	14.40444444	14.31555556	13.97444444	14.32666667	14.11222222	14.02	14.31	13.68555556	14.06777778	14.35666667	14.97888889	13.84888889	15.03	14.04222222	14.34333333
8/11/2019 11:54:11	-118.514381	42.54363938	1238.036	-118.514373	42.54363933	1234.395755	-118.5143926	42.54365598	1236.781839	8/11/2019 11:55:10	18.757	18.06	17.982	18.129	17.894	17.507	18.015	17.534	17.062	17.18	17.466	17.428	17.568	17.303	17.236	17.166	16.853	17.203	16.75	17.066	16.692	16.896	16.982	16.761	16.829	16.785	16.417	16.838	16.597	16.398	16.632	16.035	16.574	16.536	17.43	16.401	17.226	16.412	16.742
8/11/2019 11:54:12	-118.5144145	42.54365134	1238.096258	-118.5144068	42.54365106	1234.4107	-118.5144209	42.54368741	1236.551258	8/11/2019 11:55:11	20.94333333	20.3	20.15444444	20.03	20.05111111	19.71222222	20.24888889	19.85333333	19.32222222	19.41444444	19.57	19.55111111	19.74222222	19.46555556	19.41111111	19.30666667	18.99444444	19.47111111	18.97888889	19.19222222	18.87	19.08555556	19.10888889	18.90333333	18.97666667	18.98777778	18.52777778	18.87444444	18.73	18.55333333	18.86666667	18.24666667	18.79666667	18.87888889	19.93222222	18.36333333	19.43444444	18.56777778	18.94888889
8/11/2019 11:54:13	-118.5144486	42.54366394	1238.123032	-118.5144405	42.54366332	1234.403103	-118.514444	42.54371987	1236.472774	8/11/2019 11:55:12	23.19666667	22.55555556	22.58333333	22.60555556	22.36777778	21.99444444	22.55777778	22.09888889	21.61333333	21.75444444	21.86555556	21.91333333	22.14777778	21.84111111	21.66666667	21.59333333	21.27333333	21.71444444	21.23444444	21.55333333	21.16888889	21.42777778	21.46222222	21.27666667	21.29333333	21.18888889	20.84666667	21.17444444	21.03666667	20.81555556	21.05888889	20.58888889	21.16666667	21.17888889	22.08555556	20.87888889	21.70777778	20.83777778	21.26444444
8/11/2019 11:54:14	-118.5144834	42.54367668	1238.1448	-118.5144756	42.54367575	1234.38801	-118.514482	42.54374008	1236.3592	8/11/2019 11:55:13	23.12111111	22.36222222	22.36666667	22.48222222	22.32555556	21.89555556	22.35444444	22.01777778	21.40444444	21.55777778	21.85	21.75555556	21.90777778	21.73444444	21.55333333	21.47	21.12222222	21.55333333	21.08	21.40111111	21.00666667	21.29666667	21.25777778	21.05	21.09333333	21.03	20.66555556	21.06555556	20.87	20.74	20.96666667	20.35444444	20.92222222	21.03888889	21.79333333	20.60666667	21.73888889	20.80888889	21.02888889
8/11/2019 11:54:15	-118.5145194	42.54368984	1238.137839	-118.5145118	42.54368876	1234.342868	-118.5145157	42.54374544	1236.145452	8/11/2019 11:55:14	23.24555556	22.58333333	22.39111111	22.49222222	22.40444444	21.8	22.47666667	21.95666667	21.42222222	21.58	21.76	21.76	21.84777778	21.62333333	21.59333333	21.46888889	21.23777778	21.52888889	21.08111111	21.33222222	20.92555556	21.24222222	21.31222222	21.08333333	21.22666667	21.05333333	20.68666667	20.95777778	20.9	20.76666667	21.08888889	20.52777778	21.00222222	21.31222222	21.87222222	20.68222222	21.59888889	20.81333333	21.09555556
8/11/2019 11:54:16	-118.514556	42.5437033	1238.149871	-118.5145487	42.54370229	1234.324348	-118.5145353	42.54369556	1235.997323	8/11/2019 11:55:15	21.83555556	20.98666667	21.16333333	20.84444444	20.79666667	20.42777778	20.99222222	20.52555556	19.96222222	20.03	20.23111111	20.36333333	20.47888889	20.19111111	20.17888889	20.05444444	19.70333333	20.05777778	19.58888889	19.93	19.59444444	19.80111111	19.84333333	19.54111111	19.67	19.64333333	19.26777778	19.67777778	19.37666667	19.24666667	19.58555556	19.10888889	19.51	19.68888889	20.61888889	19.21555556	20.14555556	19.25777778	19.73777778
8/11/2019 11:54:17	-118.5145935	42.54371707	1238.20471	-118.5145861	42.54371605	1234.337087	-118.5145661	42.54367597	1236.068839	8/11/2019 11:55:16	24.23333333	23.58444444	23.43777778	23.59111111	23.47666667	23.08777778	23.66333333	23.17222222	22.58777778	22.68777778	22.95	22.99777778	23.12888889	22.97777778	22.87444444	22.69666667	22.43111111	22.71111111	22.30555556	22.61222222	22.24	22.52888889	22.49111111	22.23888889	22.3	22.28111111	21.86333333	22.30111111	22.12555556	21.83666667	22.12777778	21.55888889	22.10444444	22.35555556	23.01111111	21.33888889	22.58222222	21.72666667	22.18777778
8/11/2019 11:54:18	-118.5146316	42.54373061	1238.255613	-118.5146237	42.5437297	1234.358784	-118.5146013	42.54367465	1236.161355	8/11/2019 11:55:17	25.73666667	25.13111111	25.30222222	25.08444444	24.97333333	24.64333333	25.09	24.62777778	24.11888889	24.15111111	24.43555556	24.43111111	24.59444444	24.32	24.30111111	24.17555556	23.82	24.12444444	23.73111111	24.05222222	23.65444444	23.88888889	23.88777778	23.69222222	23.70555556	23.65444444	23.38777778	23.61888889	23.59333333	23.38777778	23.58666667	22.90555556	23.57888889	23.56444444	24.33111111	22.92	23.87888889	23.15555556	23.54
8/11/2019 11:54:19	-118.5146693	42.54374348	1238.2688	-118.5146611	42.54374256	1234.30495	-118.5146399	42.5436819	1236.1857	8/11/2019 11:55:18	24.04	23.30111111	23.30444444	23.28222222	23.10666667	22.64222222	23.12444444	22.70555556	22.22888889	22.50333333	22.54888889	22.61	22.76	22.47555556	22.39777778	22.30444444	22.02444444	22.28	21.90333333	22.25111111	21.80444444	22.02111111	22.03111111	21.84888889	21.88555556	21.85888889	21.50444444	21.75222222	21.59666667	21.40444444	21.75222222	21.25777778	21.56555556	21.53777778	22.55777778	21.24666667	22.19	21.41555556	21.84
8/11/2019 11:54:20	-118.5147069	42.54375614	1238.222387	-118.5146987	42.54375525	1234.228568	-118.5147018	42.5437115	1236.185806	8/11/2019 11:55:19	21.68555556	20.95555556	20.84666667	20.88555556	20.70444444	20.45333333	21.02111111	20.60555556	20.06333333	20.11111111	20.29888889	20.34777778	20.47777778	20.25111111	20.20333333	20.11777778	19.71444444	20.16222222	19.64111111	19.98444444	19.55555556	19.85666667	19.81222222	19.73888889	19.74111111	19.65555556	19.28222222	19.64777778	19.47333333	19.27888889	19.61	18.93666667	19.56	19.47888889	20.17333333	19.01888889	19.81111111	19.23111111	19.49777778
8/11/2019 11:54:21	-118.5147437	42.54376914	1238.162677	-118.5147356	42.54376835	1234.175887	-118.514754	42.54373775	1236.138774	8/11/2019 11:55:20	18.90111111	18.11222222	18.21666667	18.16444444	18.14888889	17.71777778	18.25444444	17.81777778	17.23	17.49222222	17.63555556	17.68444444	17.78666667	17.60444444	17.45777778	17.42111111	17.15222222	17.52	16.95777778	17.37444444	16.96555556	17.22333333	17.30111111	17.03666667	16.98333333	17.05222222	16.69666667	16.98555556	16.81666667	16.63	16.89555556	16.32444444	16.83444444	16.88333333	17.48111111	16.37111111	17.30666667	16.67	17.07444444
8/11/2019 11:54:22	-118.5147805	42.54378282	1238.185968	-118.5147722	42.54378185	1234.203935	-118.5147839	42.54374879	1236.088129	8/11/2019 11:55:21	17.14555556	16.34222222	16.23	16.52666667	16.29	15.91444444	16.55666667	16.07222222	15.64	15.84333333	15.95111111	16.03	16.02666667	15.87555556	15.85555556	15.79888889	15.47555556	15.76111111	15.32555556	15.82111111	15.40888889	15.56222222	15.62333333	15.33111111	15.42666667	15.43	15.02444444	15.39777778	15.25666667	14.95222222	15.31888889	14.63777778	15.08666667	15.14	15.88666667	14.7	15.76888889	15	15.29333333
8/11/2019 11:54:23	-118.5148176	42.5437959	1238.2274	-118.5148093	42.54379494	1234.241887	-118.514817	42.54376253	1236.070767	8/11/2019 11:55:22	16.893	16.32	16.208	16.27	16.163	15.772	16.359	15.997	15.419	15.605	15.776	15.86	15.978	15.742	15.741	15.699	15.322	15.778	15.282	15.526	15.253	15.389	15.466	15.33	15.338	15.3	14.96	15.294	15.148	14.968	15.214	14.453	14.911	14.983	15.741	14.661	15.506	14.814	15.168
8/11/2019 11:54:24	-118.5148548	42.54380854	1238.26071	-118.5148465	42.54380774	1234.24929	-118.5148564	42.54377912	1236.042774	8/11/2019 11:55:23	17.04666667	16.33666667	16.24222222	16.37111111	16.22888889	15.80111111	16.37333333	15.96777778	15.48666667	15.73444444	15.79	15.89444444	16.04111111	15.86333333	15.83111111	15.68555556	15.33	15.69777778	15.26555556	15.56666667	15.15888889	15.55222222	15.51333333	15.36888889	15.29444444	15.37333333	14.87222222	15.25222222	15.18666667	14.96777778	15.16888889	14.61555556	15.07777778	15.08555556	16.02555556	14.72333333	15.64444444	15.05111111	15.08
8/11/2019 11:54:25	-118.514893	42.54382116	1238.325935	-118.5148849	42.54382079	1234.266871	-118.5149075	42.54379752	1235.998903	8/11/2019 11:55:24	16.55444444	15.62444444	15.76	15.99444444	15.85888889	15.44888889	15.96666667	15.64444444	15.04777778	15.14555556	15.34111111	15.46666667	15.57	15.34888889	15.23	15.16444444	14.90555556	15.31777778	14.82888889	15.16333333	14.77888889	15.02777778	15.04777778	14.78	14.87666667	14.77666667	14.52	14.88777778	14.61	14.43666667	14.76888889	14.12777778	14.43333333	14.26666667	15.41555556	14.16	15.13888889	14.42222222	14.75333333
8/11/2019 11:54:26	-118.5149315	42.54383396	1238.386226	-118.5149218	42.54383309	1234.275587	-118.5149595	42.54381558	1235.885419	8/11/2019 11:55:25	16.17333333	15.44666667	15.33666667	15.63888889	15.41111111	15.11666667	15.57	15.09222222	14.68222222	14.99111111	15.09111111	15.26333333	15.29777778	15.12	14.98222222	14.87666667	14.59777778	14.94555556	14.55666667	14.75444444	14.46444444	14.79333333	14.73444444	14.45555556	14.46777778	14.54555556	14.12222222	14.56111111	14.33	14.04777778	14.33444444	13.86777778	14.33555556	13.99111111	15.23444444	14.08555556	14.99777778	13.87888889	14.4
8/11/2019 11:54:27	-118.5149706	42.54384668	1238.5342	-118.5149626	42.54384656	1234.38368	-118.5149913	42.54382982	1235.9138	8/11/2019 11:55:26	17.01	16.17888889	16.37111111	16.39333333	16.31888889	15.84	16.51777778	16.01888889	15.55111111	15.74555556	15.89888889	16.00777778	16.06777778	15.91555556	15.82666667	15.84555556	15.44666667	15.85888889	15.32	15.65555556	15.30888889	15.60444444	15.67777778	15.29	15.45777778	15.42	15.02333333	15.36222222	15.10333333	15.01111111	15.20222222	14.71222222	15.16111111	15.15555556	15.82666667	14.75888889	15.82444444	14.88777778	15.40222222
8/11/2019 11:54:28	-118.5150107	42.54385965	1238.575387	-118.5150026	42.54385952	1234.396403	-118.5150316	42.54384234	1235.899032	8/11/2019 11:55:27	20.73111111	19.89777778	20.11333333	20.17777778	20.02777778	19.76222222	20.16888889	19.84111111	19.41444444	19.47	19.7	19.73888889	19.85	19.78555556	19.68777778	19.65333333	19.31666667	19.57888889	19.17333333	19.59333333	19.20777778	19.46111111	19.55666667	19.28111111	19.29666667	19.26666667	19.04111111	19.27111111	19.06	18.90222222	19.21777778	18.75444444	19.17777778	19.00333333	19.63222222	18.43555556	19.49111111	18.93555556	19.25666667
8/11/2019 11:54:29	-118.5150514	42.54387296	1238.569065	-118.5150434	42.54387292	1234.363523	-118.5150788	42.54385583	1235.775323	8/11/2019 11:55:28	21.06111111	20.31333333	20.37444444	20.38888889	20.32777778	20.00333333	20.46111111	20.18888889	19.79333333	19.8	20.13222222	20.11444444	20.31777778	20.07888889	20.02111111	19.94888889	19.62444444	20.08444444	19.55666667	19.9	19.61777778	19.78888889	19.89111111	19.63888889	19.76222222	19.67555556	19.34888889	19.66666667	19.48333333	19.19555556	19.53555556	18.88555556	19.50222222	19.38888889	19.96	19.14777778	19.94333333	19.29222222	19.53111111
8/11/2019 11:54:30	-118.5150902	42.54388625	1238.563581	-118.5150824	42.54388631	1234.337235	-118.5150995	42.54386452	1235.820323	8/11/2019 11:55:29	22.38555556	21.67333333	21.82666667	21.91444444	21.86777778	21.44555556	21.99444444	21.52333333	21.03111111	21.29666667	21.46444444	21.52111111	21.66222222	21.36888889	21.25444444	21.24333333	21.03666667	21.28111111	20.87888889	21.22444444	20.85222222	21.10555556	21.05888889	20.76555556	20.90222222	20.82111111	20.55	20.80333333	20.7	20.54555556	20.82444444	20.11444444	20.70444444	20.36777778	21.24444444	20.03444444	20.90333333	20.34888889	20.96222222
8/11/2019 11:54:31	-118.5151299	42.54390029	1238.616	-118.5151215	42.54390018	1234.359506	-118.5151153	42.54387762	1235.969677	8/11/2019 11:55:30	24.36333333	23.49444444	23.55777778	23.66555556	23.48	23.12111111	23.63333333	23.27222222	22.75555556	22.90333333	23.03777778	23.14333333	23.29	23.12555556	23.01555556	22.83555556	22.55222222	22.98444444	22.44888889	22.82444444	22.41444444	22.60666667	22.73222222	22.40444444	22.60888889	22.47888889	22.11666667	22.39222222	22.38	22.14111111	22.43555556	21.86	22.43777778	22.24888889	22.99444444	21.89444444	22.44666667	22.04111111	22.44888889
8/11/2019 11:54:32	-118.5151696	42.54391448	1238.6546	-118.515161	42.54391416	1234.382263	-118.5151509	42.54389008	1236.109733	8/11/2019 11:55:31	18.956	17.902	17.991	18.133	18.008	17.637	18.171	17.716	17.266	17.468	17.607	17.681	17.809	17.586	17.472	17.449	17.078	17.525	17.034	17.334	17.021	17.27	17.291	17.054	17.154	17.17	16.755	17.099	17.053	16.9	17.053	16.479	16.989	16.919	17.538	16.424	17.311	17.088	17.064
8/11/2019 11:54:33	-118.5152106	42.54392877	1238.681742	-118.5152015	42.54392825	1234.379668	-118.5152085	42.54390868	1236.133742	8/11/2019 11:55:32	17.88444444	16.97777778	16.90888889	16.93111111	16.99111111	16.61222222	17.09555556	16.73222222	16.17222222	16.42888889	16.55777778	16.63777778	16.76555556	16.51111111	16.49888889	16.33111111	16.08444444	16.40888889	15.95555556	16.28666667	16.04	16.15555556	16.22111111	16.00222222	16.04111111	16.13222222	15.77666667	16.14666667	16.01666667	15.79	16.07888889	15.38333333	15.84555556	15.88888889	16.72	15.55222222	16.44555556	15.91111111	16.21
8/11/2019 11:54:34	-118.5152516	42.54394316	1238.702774	-118.5152432	42.54394282	1234.361313	-118.5152513	42.54392347	1236.14	8/11/2019 11:55:33	16.48555556	15.83777778	15.78888889	16.03777778	15.71555556	15.39777778	15.83777778	15.50333333	14.96333333	15.2	15.30333333	15.39555556	15.56555556	15.38444444	15.25666667	15.19555556	14.83666667	15.17666667	14.76111111	15.15	14.79111111	14.94444444	15.09666667	14.84666667	14.97555556	14.86666667	14.50333333	14.93777778	14.73333333	14.57222222	14.84222222	14.28333333	14.77888889	14.80444444	15.76666667	14.59333333	15.59777778	14.71555556	15.03333333
8/11/2019 11:54:35	-118.5152929	42.54395761	1238.683871	-118.5152839	42.54395702	1234.326032	-118.5152801	42.54393333	1236.177935	8/11/2019 11:55:34	17.21111111	16.48111111	16.41222222	16.60555556	16.44777778	16.19666667	16.58444444	16.28666667	15.66888889	15.87222222	16.00666667	16.02444444	16.23555556	16.05888889	15.96777778	15.91666667	15.59666667	15.87888889	15.56222222	15.87444444	15.51	15.79777778	15.76666667	15.51111111	15.62444444	15.67111111	15.25555556	15.56777778	15.47666667	15.34111111	15.51222222	14.96111111	15.49333333	15.66666667	16.17888889	15.22666667	15.96333333	15.37222222	15.85666667
8/11/2019 11:54:36	-118.5153327	42.54397071	1238.695097	-118.5153241	42.54397029	1234.299474	-118.5153472	42.5439623	1236.187387	8/11/2019 11:55:35	19.52555556	18.84333333	18.76444444	18.75111111	18.65	18.36666667	18.88222222	18.37111111	17.86333333	18.07777778	18.20777778	18.24	18.41333333	18.09777778	18.03777778	17.92888889	17.56555556	17.93666667	17.54222222	17.84111111	17.46666667	17.8	17.70444444	17.53	17.55777778	17.55111111	17.17777778	17.47222222	17.51	17.21111111	17.49	16.86888889	17.46111111	17.48444444	18.38888889	17.05111111	18.17444444	17.33555556	17.60333333
8/11/2019 11:54:37	-118.5153718	42.54398349	1238.796533	-118.5153627	42.54398299	1234.30022	-118.5154132	42.54399242	1236.1928	8/11/2019 11:55:36	18.75666667	17.76555556	17.87555556	17.84	17.82111111	17.41777778	17.93222222	17.53	16.95222222	17.12222222	17.29222222	17.39444444	17.43222222	17.30111111	17.09444444	17.02777778	16.70666667	17.08111111	16.67111111	16.98333333	16.55111111	16.87555556	16.80222222	16.69333333	16.80444444	16.74	16.42888889	16.73444444	16.53666667	16.44111111	16.62	16.09333333	16.52555556	16.52444444	17.89444444	16.37111111	17.29	16.65777778	17.00777778
8/11/2019 11:54:38	-118.5153979	42.54399227	1238.88071	-118.5153887	42.54399175	1234.260971	-118.5154452	42.54400498	1236.162129	8/11/2019 11:55:37	19.73111111	18.97111111	18.94555556	18.93777778	18.85333333	18.46666667	18.80777778	18.47222222	18.03777778	18.23333333	18.3	18.33777778	18.38555556	18.23111111	18.14555556	18.13777778	17.69222222	18.05333333	17.65222222	18.03666667	17.51666667	17.83444444	17.81222222	17.64555556	17.69222222	17.67777778	17.38444444	17.65111111	17.54666667	17.42	17.63333333	17.20333333	17.47666667	17.43555556	18.74222222	17.35555556	18.18222222	17.56888889	17.95
8/11/2019 11:54:39	-118.5153993	42.54400128	1238.793581	-118.5153902	42.54400111	1234.148774	-118.515436	42.54400559	1236.029645	8/11/2019 11:55:38	19.88777778	18.96444444	18.96888889	18.91666667	18.89	18.43111111	18.97444444	18.57444444	18.06777778	18.12333333	18.35888889	18.32333333	18.47444444	18.21444444	18.12222222	18.11	17.66111111	18.09	17.66666667	18.00444444	17.54666667	17.78	17.79888889	17.64	17.75	17.68	17.31111111	17.62222222	17.51666667	17.34888889	17.69333333	17.15	17.60111111	17.40777778	18.34555556	17.33888889	18.43666667	17.53222222	17.76444444
8/11/2019 11:54:40	-118.5153892	42.54402133	1238.773194	-118.5153805	42.54402108	1234.148397	-118.515419	42.54402175	1236.098613	8/11/2019 11:55:39	16.91555556	15.89444444	16.03333333	16.31111111	16.01333333	15.62666667	16.20555556	15.81333333	15.31444444	15.40111111	15.62444444	15.61444444	15.79	15.59888889	15.48111111	15.44	15.11222222	15.53888889	14.97444444	15.40555556	14.95888889	15.28	15.37222222	15.10111111	15.14111111	15.16333333	14.85333333	15.17111111	15.07	14.94222222	15.14	14.54888889	15.00777778	15.18333333	16.04222222	14.83888889	15.85555556	15.12333333	15.42222222
8/11/2019 11:54:41	-118.515374	42.54404655	1238.788129	-118.5153655	42.54404619	1234.210487	-118.5154021	42.54404712	1236.259226	8/11/2019 11:55:40	17.20444444	16.40444444	16.43444444	16.59222222	16.30888889	16.03444444	16.50888889	16.20111111	15.63222222	15.84	16.01888889	16.09555556	16.21888889	15.95777778	15.96333333	15.97	15.54444444	15.85888889	15.50222222	15.78888889	15.45	15.79333333	15.73333333	15.60222222	15.65	15.70444444	15.23555556	15.65888889	15.56	15.37333333	15.69777778	14.89222222	15.63333333	15.40666667	16.55666667	15.38111111	16.12	15.45555556	15.76444444
8/11/2019 11:54:42	-118.5153638	42.5440618	1238.9398	-118.515355	42.54406157	1234.270313	-118.515388	42.54406273	1236.481133	8/11/2019 11:55:41	16.23555556	15.50444444	15.41111111	15.58	15.26	15.02444444	15.51111111	14.97555556	14.66111111	14.76555556	14.96666667	14.98444444	15.14666667	14.90444444	14.86444444	14.76666667	14.46	14.83222222	14.43555556	14.73333333	14.3	14.67111111	14.74	14.49555556	14.63777778	14.67444444	14.25	14.7	14.46	14.34777778	14.65777778	13.9	14.46555556	14.62222222	15.47444444	14.34666667	15.18555556	14.61555556	14.76666667
8/11/2019 11:54:43	-118.5153557	42.54406282	1238.946935	-118.5153466	42.54406291	1234.249652	-118.5153787	42.54406321	1236.574355	8/11/2019 11:55:42	16.331	15.536	15.738	15.845	15.756	15.279	15.799	15.301	14.897	14.996	15.218	15.212	15.407	15.237	15.101	15.092	14.676	15.1	14.613	15.072	14.686	14.992	14.865	14.754	14.801	14.737	14.445	14.774	14.785	14.479	14.797	14.148	14.74	14.867	15.679	14.572	15.352	14.687	14.886
8/11/2019 11:54:44	-118.5153376	42.54405836	1238.879839	-118.5153284	42.54405864	1234.209481	-118.5153576	42.5440563	1236.612258	8/11/2019 11:55:43	16.86666667	16.18666667	16.12111111	16.11	15.98	15.75222222	16.23888889	15.83888889	15.30777778	15.51333333	15.61555556	15.69333333	15.88888889	15.63777778	15.61111111	15.56888889	15.27333333	15.52555556	15.14	15.45333333	15.15333333	15.35444444	15.38222222	15.15222222	15.25222222	15.22111111	14.93888889	15.37555556	15.16333333	14.94888889	15.25	14.73111111	15.1	15.18333333	16.31666667	15.01111111	15.98666667	15.09888889	15.4
8/11/2019 11:54:45	-118.5153103	42.54404983	1238.924516	-118.5153016	42.54405038	1234.254365	-118.5153187	42.54403935	1236.715677	8/11/2019 11:55:44	17.13333333	16.39888889	16.64222222	16.62	16.46444444	16.03444444	16.64777778	16.10666667	15.72	15.82777778	16.06333333	16.08777778	16.22555556	16.09444444	15.92666667	15.83222222	15.62111111	15.91777778	15.44555556	15.85666667	15.49666667	15.66333333	15.71888889	15.50777778	15.58333333	15.50222222	15.31888889	15.64	15.41666667	15.31888889	15.60222222	14.85222222	15.48888889	15.34444444	16.13555556	15.11777778	15.91666667	15.46666667	15.57333333
8/11/2019 11:54:46	-118.5152789	42.54403948	1238.9524	-118.5152705	42.54404012	1234.29989	-118.5152884	42.54402945	1236.811	8/11/2019 11:55:45	17.45444444	16.61444444	16.60333333	16.83	16.56777778	16.37	16.94111111	16.37111111	15.94111111	16.09111111	16.28666667	16.32222222	16.52	16.26444444	16.18222222	16.21	15.79444444	16.21555556	15.72111111	16.06333333	15.72222222	15.96666667	15.97444444	15.82777778	15.90333333	15.84444444	15.49444444	15.80777778	15.76666667	15.55555556	15.76111111	15.10888889	15.77	15.82666667	16.52111111	15.40444444	16.26666667	15.47777778	16.09
8/11/2019 11:54:47	-118.5152458	42.54402863	1238.997387	-118.515237	42.54402919	1234.347626	-118.5152571	42.5440195	1236.892323	8/11/2019 11:55:46	17.06	16.41222222	16.21888889	16.46333333	16.27111111	15.95444444	16.49666667	16.05777778	15.55333333	15.74777778	15.98333333	16.01777778	16.15888889	15.86333333	15.79111111	15.83666667	15.39111111	15.78	15.43111111	15.71	15.33666667	15.62	15.62111111	15.42888889	15.48444444	15.39888889	15.11111111	15.44555556	15.30333333	15.12777778	15.38555556	14.79555556	15.16222222	15.19888889	16.13666667	14.68666667	15.83111111	15.17555556	15.64777778
8/11/2019 11:54:48	-118.5152114	42.54401719	1239.017548	-118.5152025	42.54401784	1234.389455	-118.5152137	42.54400293	1236.965935	8/11/2019 11:55:47	17.02333333	16.11111111	16.20666667	16.35222222	16.34555556	15.78222222	16.42777778	15.98333333	15.47333333	15.71888889	15.93777778	15.87555556	16.03888889	15.75111111	15.69666667	15.64333333	15.35333333	15.60666667	15.22	15.55777778	15.17888889	15.36555556	15.51111111	15.18777778	15.32888889	15.36555556	14.88666667	15.3	15.09666667	14.96444444	15.13333333	14.47666667	15.11222222	14.94444444	15.95444444	14.88888889	15.66777778	15	15.18666667
8/11/2019 11:54:49	-118.5151767	42.54400555	1239.048645	-118.5151683	42.54400636	1234.414165	-118.5151868	42.54399729	1237.032484	8/11/2019 11:55:48	16.56666667	15.92666667	15.80444444	15.98777778	15.86111111	15.48333333	16.09555556	15.54444444	15.09777778	15.26888889	15.43444444	15.46111111	15.60444444	15.36888889	15.32777778	15.21444444	14.92444444	15.22444444	14.84888889	15.12333333	14.75222222	14.96222222	14.97	14.76	14.91777778	14.83	14.45444444	14.83333333	14.71666667	14.39444444	14.68777778	13.96222222	14.65666667	14.63666667	15.69777778	14.43	15.43444444	14.47444444	14.76
8/11/2019 11:54:50	-118.5151419	42.54399377	1238.998258	-118.5151337	42.54399459	1234.385568	-118.5151754	42.54399595	1236.928097	8/11/2019 11:55:49	17.36111111	16.69	16.55666667	16.66222222	16.65444444	16.25888889	16.74888889	16.30888889	15.86444444	16.02666667	16.20666667	16.22444444	16.30777778	16.05444444	16.10111111	15.86777778	15.55555556	15.97111111	15.52444444	15.81888889	15.36777778	15.69555556	15.70111111	15.47777778	15.58888889	15.45888889	15.17	15.41444444	15.3	15.1	15.35333333	14.76	15.28777778	15.19777778	15.86111111	14.61	15.55111111	15.03555556	15.42
8/11/2019 11:54:51	-118.5151072	42.54398192	1238.9246	-118.5150991	42.54398274	1234.360033	-118.5151534	42.54399207	1236.725267	8/11/2019 11:55:50	18.12777778	17.56444444	17.56555556	17.66888889	17.37555556	17.07111111	17.65444444	17.22888889	16.73555556	16.89666667	17.14333333	17.11777778	17.21555556	16.98	16.91888889	16.90888889	16.47444444	16.94555556	16.53777778	16.82777778	16.40222222	16.65333333	16.61555556	16.42555556	16.52888889	16.50888889	16.17222222	16.54	16.33333333	16.11444444	16.38333333	15.75111111	16.28777778	16.09333333	17.10444444	15.56111111	16.82888889	16.08555556	16.46666667
8/11/2019 11:54:52	-118.5150722	42.5439697	1238.812645	-118.5150639	42.54397045	1234.351526	-118.5151027	42.54397903	1236.677484	8/11/2019 11:55:51	19.73666667	19.10888889	19.11555556	19.25777778	19.06	18.65444444	19.16666667	18.71444444	18.30111111	18.50888889	18.75777778	18.77777778	18.89777778	18.73444444	18.62444444	18.60888889	18.30666667	18.61555556	18.17	18.55666667	18.17666667	18.37888889	18.32222222	18.26666667	18.22666667	18.22	17.82444444	18.17444444	18.06333333	17.86555556	18.22222222	17.53111111	17.99888889	17.91777778	18.49222222	17.39555556	18.47777778	17.73222222	18.09666667
8/11/2019 11:54:53	-118.5150368	42.54395716	1238.745903	-118.5150289	42.54395808	1234.365855	-118.5150388	42.54395869	1236.954065	8/11/2019 11:55:52	21.03666667	20.26888889	20.33888889	20.27222222	20.20555556	19.97333333	20.39	20.03666667	19.57888889	19.74666667	19.98777778	19.87222222	20.07111111	19.84888889	19.72666667	19.69111111	19.34666667	19.72444444	19.43555556	19.70333333	19.34333333	19.51	19.51777778	19.28666667	19.39777778	19.3	18.99222222	19.31444444	19.16	18.95888889	19.24555556	18.61444444	19.24111111	19.01777778	19.69222222	18.31444444	19.31111111	19.02888889	19.30333333
8/11/2019 11:54:54	-118.5150021	42.54394544	1238.7382	-118.5149956	42.54394675	1234.38926	-118.5150115	42.54394826	1237.1272	8/11/2019 11:55:53	19.499	18.951	18.959	18.959	18.966	18.659	19.141	18.733	18.169	18.436	18.566	18.64	18.885	18.625	18.577	18.441	18.111	18.505	18.036	18.465	18.01	18.255	18.218	18.154	18.165	18.036	17.677	18.026	17.875	17.718	18.006	17.35	17.869	17.77	18.272	17.205	18.229	17.455	18.043
8/11/2019 11:54:55	-118.5149663	42.54393396	1238.731125	-118.5149584	42.54393455	1234.371597	-118.5149976	42.54394358	1237.017438	8/11/2019 11:55:54	17.90222222	17.33222222	17.33333333	17.35444444	17.15222222	16.9	17.36333333	17.06333333	16.56888889	16.70666667	16.82444444	16.94444444	17.07222222	16.90111111	16.88666667	16.79666667	16.39444444	16.80444444	16.35555556	16.71777778	16.38222222	16.61444444	16.71444444	16.47111111	16.49444444	16.63888889	16.13444444	16.46	16.37333333	16.14333333	16.47444444	15.85888889	16.43111111	16.30222222	16.96666667	15.62555556	16.64111111	16.16333333	16.56666667
8/11/2019 11:54:56	-118.514929	42.54392194	1238.688733	-118.5149211	42.54392229	1234.336	-118.5149588	42.54393434	1236.926667	8/11/2019 11:55:55	19.09444444	18.32	18.45777778	18.59111111	18.34111111	18.02888889	18.64	18.23666667	17.83666667	18.05555556	18.19333333	18.25111111	18.38111111	18.26333333	18.19555556	18.06333333	17.87666667	18.13555556	17.75222222	18.05111111	17.67777778	18.01666667	17.99888889	17.77444444	17.75888889	17.76222222	17.43222222	17.80222222	17.71666667	17.49444444	17.74111111	17.07777778	17.58222222	17.57	18.07333333	16.83	17.76	17.28777778	17.64333333
8/11/2019 11:54:57	-118.5148916	42.54390978	1238.573935	-118.5148838	42.54391014	1234.293865	-118.5148893	42.54390722	1237.002323	8/11/2019 11:55:56	17.67777778	17.04222222	17.13	17.00777778	17.00222222	16.57888889	17.11	16.61888889	16.22666667	16.39888889	16.64444444	16.62666667	16.85	16.61111111	16.52888889	16.47	16.12666667	16.47444444	16.03222222	16.40888889	15.99777778	16.29444444	16.30222222	16.09333333	16.11333333	16.10555556	15.77	16.08777778	15.88	15.77333333	16.10111111	15.37555556	16.03	15.86888889	16.72666667	15.42222222	16.35222222	15.67666667	16.11111111
8/11/2019 11:54:58	-118.5148534	42.54389748	1238.509548	-118.5148461	42.5438978	1234.326148	-118.5148289	42.54387793	1237.127839	8/11/2019 11:55:57	17.45777778	16.74	16.66444444	16.82666667	16.67333333	16.45	16.92333333	16.50777778	16.06444444	16.20333333	16.45777778	16.48222222	16.56444444	16.46444444	16.28111111	16.22777778	15.96666667	16.26333333	15.83777778	16.12555556	15.88222222	16.01888889	16.12555556	15.87777778	15.91666667	15.95111111	15.52111111	15.85666667	15.83333333	15.51777778	15.84666667	15.23777778	15.63	15.53333333	16.35777778	15.07666667	16.39111111	15.46222222	15.8
8/11/2019 11:54:59	-118.5148161	42.54388552	1238.5464	-118.5148107	42.54388625	1234.413617	-118.5147979	42.54386857	1237.3306	8/11/2019 11:55:58	17.04777778	16.44888889	16.52777778	16.41555556	16.49555556	15.98555556	16.54666667	16.10333333	15.66111111	15.79888889	15.94555556	16.02333333	16.20888889	15.95888889	15.87444444	15.88444444	15.47444444	15.91333333	15.42555556	15.8	15.37	15.59555556	15.66222222	15.46777778	15.54	15.47777778	15.13111111	15.47222222	15.33666667	15.09666667	15.52777778	14.84555556	15.13111111	15.29444444	16.11777778	15.06	15.94777778	15.19777778	15.42666667
8/11/2019 11:55:00	-118.5147793	42.54387401	1238.520968	-118.5147717	42.54387366	1234.443219	-118.5147522	42.54385115	1237.502258	8/11/2019 11:55:59	17.15111111	16.56333333	16.53777778	16.58666667	16.43111111	16.14333333	16.57111111	16.09777778	15.77666667	15.99555556	16.10222222	16.10888889	16.25555556	16.06666667	15.98222222	15.95333333	15.61777778	16.02555556	15.56444444	15.91666667	15.56333333	15.74222222	15.79444444	15.62111111	15.74	15.60444444	15.28444444	15.64555556	15.46	15.37777778	15.51111111	15.04	15.42333333	15.48555556	16.25666667	14.96111111	15.90888889	15.29666667	15.58666667
8/11/2019 11:55:01	-118.5147429	42.54386312	1238.510419	-118.5147354	42.5438624	1234.461506	-118.5147065	42.54383535	1237.725258	8/11/2019 11:56:00	17.51555556	16.65222222	16.52666667	16.81555556	16.66	16.20111111	16.81777778	16.43333333	15.88	16.03111111	16.21666667	16.33666667	16.39111111	16.17	16.15111111	16.07222222	15.72777778	16.16111111	15.70555556	16.02444444	15.62888889	15.91666667	15.87222222	15.67777778	15.85444444	15.72777778	15.39555556	15.68111111	15.65333333	15.49666667	15.7	15.13333333	15.43333333	15.53222222	16.71666667	15.05333333	16.17333333	15.53777778	15.88222222
8/11/2019 11:55:02	-118.5147088	42.54385295	1238.514806	-118.514701	42.5438518	1234.453487	-118.5146783	42.5438275	1237.832516	8/11/2019 11:56:01	18.63222222	18.03666667	18.11888889	18.05222222	17.92222222	17.68333333	18.08777778	17.68555556	17.17666667	17.34222222	17.59111111	17.66777778	17.74777778	17.62	17.49555556	17.49333333	17.10444444	17.56888889	17.13888889	17.39444444	17.05555556	17.27444444	17.29888889	17.14	17.17777778	17.20888889	16.76555556	17.17555556	17.03666667	16.81555556	17.23666667	16.49444444	16.97333333	16.86888889	17.55666667	16.39	17.54888889	16.90888889	17.11
8/11/2019 11:55:03	-118.5146761	42.5438431	1238.5412	-118.5146681	42.5438415	1234.452337	-118.514649	42.54381921	1237.908367	8/11/2019 11:56:02	18.22	17.707	17.594	17.745	17.546	17.273	17.726	17.322	16.885	17.015	17.295	17.321	17.367	17.142	17.112	17.115	16.653	17.135	16.687	16.939	16.702	16.867	16.982	16.735	16.806	16.838	16.466	16.722	16.66	16.516	16.698	16.096	16.489	16.417	17.36	15.981	17.274	16.432	16.905
8/11/2019 11:55:04	-118.514644	42.54383288	1238.621032	-118.5146373	42.54383148	1234.445052	-118.5146189	42.54380989	1238.014419	8/11/2019 11:56:03	17.37777778	16.68888889	16.61444444	16.79	16.65	16.31777778	16.84777778	16.36	15.99555556	16.10444444	16.30666667	16.41444444	16.38222222	16.24	16.12888889	16.10222222	15.87222222	16.13111111	15.70555556	16.10888889	15.71666667	15.97444444	15.99777778	15.77555556	15.85777778	15.83777778	15.44666667	15.9	15.69666667	15.49666667	15.73222222	15.28	15.56555556	15.52555556	16.45222222	15.07	16.18888889	15.39666667	15.82777778
8/11/2019 11:55:05	-118.5146123	42.54382292	1238.653742	-118.5146032	42.54382062	1234.402377	-118.5145845	42.54379902	1238.134484	8/11/2019 11:56:04	17.67111111	16.99	16.67888889	17.07111111	16.92666667	16.43666667	16.96333333	16.52	16.02444444	16.21	16.48	16.49888889	16.68777778	16.43	16.29555556	16.23888889	15.99333333	16.25555556	15.82222222	16.20666667	15.86222222	16.01888889	16.01333333	15.92888889	15.94666667	15.98777778	15.54666667	15.91444444	15.77	15.59111111	15.88222222	15.29666667	15.78888889	15.74111111	16.58111111	15.38	16.27444444	15.56666667	15.82
8/11/2019 11:55:06	-118.5145806	42.54381306	1238.640677	-118.5145708	42.54381034	1234.344148	-118.5145611	42.54379168	1238.145161	8/11/2019 11:56:05	16.28	15.56	15.58111111	15.76111111	15.53666667	15.27333333	15.56111111	15.23666667	14.87	14.91	15.09333333	15.18444444	15.33333333	15.17555556	15.00888889	14.99555556	14.66888889	15.03888889	14.59333333	14.91444444	14.56555556	14.76888889	14.84444444	14.71444444	14.72888889	14.72888889	14.35555556	14.65888889	14.57	14.51555556	14.74333333	14.06777778	14.6	14.75777778	15.66333333	14.24888889	15.38	14.34111111	14.9
8/11/2019 11:55:07	-118.5145482	42.54380285	1238.687419	-118.5145382	42.54379986	1234.310077	-118.5145529	42.54379681	1238.153419	8/11/2019 11:56:06	16.52333333	15.76888889	15.94555556	15.83555556	15.74222222	15.42111111	15.90777778	15.45666667	14.99555556	15.2	15.42222222	15.38	15.37666667	15.29444444	15.2	15.14444444	14.81888889	15.08333333	14.8	15.04555556	14.80555556	15.10444444	15.05666667	14.90666667	14.91	14.89222222	14.52444444	14.90222222	14.75666667	14.53888889	14.91888889	14.27222222	14.69555556	14.67777778	15.74888889	14.68333333	15.38	14.66222222	14.96666667
8/11/2019 11:55:08	-118.5145167	42.54379316	1238.734	-118.5145064	42.54378994	1234.31172	-118.5145272	42.54379278	1238.240667	8/11/2019 11:56:07	17.27777778	16.38555556	16.48555556	16.66555556	16.45888889	16.04333333	16.56555556	16.16666667	15.62444444	15.82333333	15.98	16.03888889	16.05333333	15.99555556	15.90444444	15.79333333	15.45	15.86222222	15.43444444	15.69333333	15.35777778	15.59444444	15.62333333	15.41	15.59555556	15.48333333	15.18222222	15.44777778	15.27666667	15.23333333	15.39888889	14.78444444	15.35444444	15.64666667	16.25555556	15.14333333	16.03333333	15.17555556	15.42
8/11/2019 11:55:09	-118.5144838	42.54378343	1238.824161	-118.5144727	42.54377988	1234.328677	-118.5144936	42.543784	1238.383581	8/11/2019 11:56:08	19.47555556	18.65555556	18.81777778	18.93666667	18.67	18.33555556	18.83333333	18.4	17.91666667	18.06666667	18.19111111	18.27555556	18.35666667	18.08	18.16555556	18.02777778	17.65666667	18.03111111	17.55555556	17.97111111	17.60777778	17.74333333	17.72666667	17.60666667	17.64	17.62444444	17.29888889	17.63222222	17.43	17.35777778	17.63666667	17.04222222	17.40555556	17.62444444	18.38222222	17.08444444	18.27555556	17.33444444	17.66333333
8/11/2019 11:55:10	-118.5144502	42.54377299	1238.968419	-118.5144387	42.54376933	1234.372123	-118.5144655	42.54377397	1238.471387	8/11/2019 11:56:09	20.53666667	19.81444444	19.79222222	19.84333333	19.55444444	19.35222222	19.76555556	19.31333333	18.80666667	19.02333333	19.29555556	19.21444444	19.29	19.11333333	19.04111111	18.90111111	18.56555556	18.88222222	18.48222222	18.77555556	18.42888889	18.61444444	18.70666667	18.50444444	18.46888889	18.51666667	18.13111111	18.43222222	18.26333333	18.16555556	18.44111111	17.88555556	18.31111111	18.31777778	19.32333333	18.06777778	18.82	18.24	18.47888889
8/11/2019 11:55:11	-118.5144174	42.54376275	1239.03429	-118.5144058	42.54375898	1234.403581	-118.5144186	42.54374956	1238.408097	8/11/2019 11:56:10	23.05444444	22.09444444	22.18	22.22666667	22.25	21.71666667	22.18444444	21.81222222	21.24333333	21.39777778	21.58555556	21.65777778	21.66555556	21.41666667	21.46333333	21.38333333	21.00111111	21.34666667	20.90555556	21.17777778	20.88777778	21.05888889	21.09333333	20.89777778	20.98444444	20.81888889	20.54	20.92333333	20.74333333	20.45333333	20.70888889	20.28777778	20.75555556	20.84444444	21.47444444	20.29777778	21.40444444	20.30777778	20.75555556
8/11/2019 11:55:12	-118.5143844	42.54375248	1239.0246	-118.5143727	42.5437486	1234.349523	-118.514374	42.54373172	1238.328067	8/11/2019 11:56:11	23.55666667	22.86666667	22.71555556	22.91888889	22.82	22.31777778	22.88444444	22.33333333	21.91111111	22.05555556	22.28777778	22.23777778	22.37555556	22.14444444	22.03666667	22.03111111	21.68222222	21.92666667	21.55777778	21.83222222	21.44444444	21.74111111	21.63444444	21.56888889	21.60111111	21.65444444	21.13444444	21.47555556	21.27333333	21.24888889	21.51888889	20.79444444	21.53777778	21.39777778	22.12777778	20.98555556	22.05	21.01111111	21.46111111
8/11/2019 11:55:13	-118.5143505	42.54374186	1239.015935	-118.5143384	42.54373777	1234.295781	-118.5143417	42.54372143	1238.215419	8/11/2019 11:56:12	22.676	21.973	21.873	22.091	21.903	21.427	21.837	21.461	21.033	21.234	21.371	21.441	21.511	21.22	21.193	21.114	20.789	21.132	20.652	21.077	20.683	20.863	20.866	20.701	20.684	20.604	20.305	20.578	20.512	20.382	20.674	20.046	20.496	20.573	21.281	20.222	21.069	20.131	20.696
8/11/2019 11:55:14	-118.5143162	42.54373092	1239.032742	-118.5143034	42.54372654	1234.270819	-118.5143159	42.5437176	1238.156613	8/11/2019 11:56:13	21.78	21.08111111	20.97333333	21.08555556	21.10888889	20.65333333	21.01666667	20.60222222	20.18222222	20.32111111	20.46555556	20.41444444	20.60222222	20.38333333	20.34	20.20333333	19.92	20.23777778	19.83888889	20.12333333	19.83222222	19.98888889	20.01666667	19.77888889	19.78555556	19.78111111	19.46555556	19.66333333	19.61666667	19.45777778	19.65555556	19.07333333	19.66555556	19.50555556	20.48	19.24222222	20.38111111	19.26222222	19.71111111
8/11/2019 11:55:15	-118.5142832	42.54372074	1239.132806	-118.5142704	42.5437162	1234.312677	-118.5142828	42.54370815	1238.172548	8/11/2019 11:56:14	19.18888889	18.52222222	18.34666667	18.50555556	18.47888889	18.02	18.54111111	18.00777778	17.63777778	17.84111111	18.02777778	17.98333333	18.02777778	17.76888889	17.74777778	17.73333333	17.47777778	17.72111111	17.32666667	17.51333333	17.23	17.42444444	17.43333333	17.21	17.28111111	17.24666667	16.97111111	17.18333333	17.15666667	16.9	17.13111111	16.69444444	17.09666667	17.38888889	18.14111111	16.78111111	17.89333333	17.04777778	17.23666667
8/11/2019 11:55:16	-118.5142514	42.54371038	1239.2126	-118.5142384	42.54370575	1234.321437	-118.514255	42.54370081	1238.1831	8/11/2019 11:56:15	18.07777778	17.40222222	17.25444444	17.36888889	17.28222222	16.89	17.37444444	17.01666667	16.47444444	16.61111111	16.81444444	16.81777778	17.02444444	16.76333333	16.58222222	16.58333333	16.26555556	16.64222222	16.27111111	16.52888889	16.04111111	16.27444444	16.30333333	16.14222222	16.33111111	16.25333333	15.79333333	16.09777778	16.00666667	15.91333333	16.21	15.56555556	16.05555556	16.29	17.22333333	15.85666667	16.70444444	15.98555556	16.49222222
8/11/2019 11:55:17	-118.5142197	42.54369982	1239.227677	-118.5142064	42.54369505	1234.285823	-118.5142287	42.5436935	1238.138161	8/11/2019 11:56:16	17.54	16.84111111	16.70222222	16.87444444	16.71222222	16.28666667	16.81555556	16.46555556	15.91555556	16.05333333	16.21555556	16.36	16.46222222	16.24666667	16.05222222	16.03444444	15.71888889	16.03888889	15.70666667	15.93444444	15.60444444	15.84777778	15.87888889	15.60666667	15.75222222	15.67444444	15.29111111	15.77222222	15.54666667	15.43444444	15.71	15.10666667	15.49555556	15.56888889	16.45444444	15.31444444	16.39111111	15.57666667	15.82111111
8/11/2019 11:55:18	-118.5141873	42.54368908	1239.197194	-118.5141734	42.54368406	1234.219265	-118.5141983	42.54368388	1237.992323	8/11/2019 11:56:17	16.61111111	16.09666667	15.97	16.16888889	15.95333333	15.54222222	16.06333333	15.60222222	15.14222222	15.24666667	15.47111111	15.51444444	15.63	15.40111111	15.32444444	15.28222222	15.01	15.25666667	14.87888889	15.17444444	14.89444444	15.09888889	15.15222222	14.89444444	14.95666667	14.91555556	14.63777778	14.93777778	14.77333333	14.66777778	14.83888889	14.35444444	14.92777778	14.86888889	15.92111111	14.61888889	15.66777778	14.73111111	14.99333333
8/11/2019 11:55:19	-118.5141568	42.54367881	1239.171129	-118.5141431	42.54367359	1234.173394	-118.514157	42.54366446	1237.837774	8/11/2019 11:56:18	17.09	16.42444444	16.47555556	16.49	16.29	16.02888889	16.43666667	15.88333333	15.55444444	15.70333333	15.89333333	15.82666667	16.01111111	15.91	15.77555556	15.73555556	15.38888889	15.69666667	15.31777778	15.61111111	15.23111111	15.48666667	15.52333333	15.27888889	15.29444444	15.33888889	15.03555556	15.34	15.22333333	15.14444444	15.32666667	14.68888889	15.28333333	15.38666667	16.05888889	14.92111111	15.86222222	15.06888889	15.44
8/11/2019 11:55:20	-118.5141263	42.54366798	1239.1492	-118.5141126	42.54366264	1234.15016	-118.5141275	42.54365366	1237.7608	8/11/2019 11:56:19	17.24666667	16.46333333	16.42777778	16.51666667	16.54333333	16.16333333	16.61888889	16.13666667	15.74222222	15.91	15.97444444	16.04888889	16.16777778	16.05444444	15.95	15.86444444	15.57222222	15.84333333	15.51777778	15.74222222	15.46777778	15.61888889	15.68666667	15.51	15.58666667	15.53777778	15.17666667	15.53333333	15.43333333	15.25333333	15.55222222	14.96333333	15.42333333	15.56777778	16.40888889	14.97888889	16.16555556	15.26111111	15.75333333
8/11/2019 11:55:21	-118.5140952	42.54365706	1239.148355	-118.5140815	42.54365166	1234.161997	-118.5140978	42.54364417	1237.783839	8/11/2019 11:56:20	18.00777778	17.50777778	17.47444444	17.64777778	17.33777778	17	17.48	17.05666667	16.62444444	16.84444444	17.00666667	17.01666667	17.16777778	17.01666667	16.97666667	16.90222222	16.66	16.89111111	16.50222222	16.81	16.48777778	16.66222222	16.87888889	16.54888889	16.63888889	16.56888889	16.22	16.62444444	16.47666667	16.38	16.68555556	16.03111111	16.52333333	16.69666667	17.23333333	16.00333333	16.93888889	16.45888889	16.93666667
8/11/2019 11:55:22	-118.5140628	42.54364639	1239.212742	-118.5140487	42.54364085	1234.232423	-118.5140675	42.54363497	1237.829323	8/11/2019 11:56:21	19.59	18.84333333	18.86444444	19.05888889	18.83111111	18.45222222	18.93111111	18.45333333	18.09777778	18.32222222	18.65111111	18.51111111	18.71	18.50777778	18.38777778	18.37888889	18.12666667	18.47333333	18.04666667	18.39666667	18.06111111	18.28	18.41888889	18.07888889	18.25	18.22222222	17.88666667	18.17888889	18.02666667	18.02777778	18.18666667	17.39	17.95555556	18.10222222	18.83666667	17.37111111	18.50111111	18.07	18.33111111
8/11/2019 11:55:23	-118.5140302	42.54363556	1239.283129	-118.5140159	42.54362993	1234.295852	-118.5140345	42.54362397	1237.851129	8/11/2019 11:56:22	19.932	19.075	19.172	19.276	19.124	18.559	19.187	18.832	18.315	18.501	18.752	18.829	18.918	18.731	18.681	18.668	18.292	18.807	18.36	18.666	18.389	18.59	18.54	18.401	18.395	18.453	18.126	18.495	18.382	18.263	18.549	17.863	18.344	18.375	19.143	17.869	18.883	18.235	18.601
8/11/2019 11:55:24	-118.5139986	42.54362466	1239.313903	-118.5139844	42.54361912	1234.36279	-118.514001	42.54361296	1237.915387	8/11/2019 11:56:23	19.18777778	18.55222222	18.54444444	18.80444444	18.65222222	18.07666667	18.61777778	18.21111111	17.78222222	17.96555556	18.24777778	18.26888889	18.31111111	18.14555556	18.08777778	18.07444444	17.83444444	18.08333333	17.71444444	18.02444444	17.73888889	17.95111111	18.03333333	17.80222222	17.88333333	17.87777778	17.56666667	17.85333333	17.78666667	17.61444444	17.86	17.28444444	17.68555556	17.84222222	18.70666667	17.39666667	18.18222222	17.72	18.00333333
8/11/2019 11:55:25	-118.5139686	42.54361436	1239.351	-118.5139544	42.54360889	1234.44102	-118.5139676	42.54360232	1238.0538	8/11/2019 11:56:24	19.17444444	18.93222222	18.76	18.87444444	18.59222222	18.31444444	18.82888889	18.45666667	17.95555556	18.27444444	18.43222222	18.43222222	18.56	18.39111111	18.32555556	18.33666667	18.01222222	18.38	17.95111111	18.21666667	17.96555556	18.17111111	18.16111111	18.02888889	18.10111111	18.13111111	17.70333333	18.05888889	17.97333333	17.85	18.14666667	17.58444444	18.00777778	17.92	18.84444444	17.49666667	18.38444444	17.82666667	18.20444444
8/11/2019 11:55:26	-118.5139386	42.54360385	1239.378097	-118.5139244	42.54359834	1234.455406	-118.5139399	42.54359327	1238.144871	8/11/2019 11:56:25	20.61222222	20.11777778	19.98555556	20.20666667	19.97222222	19.56111111	19.99	19.58444444	19.19333333	19.39888889	19.64555556	19.59333333	19.73222222	19.55333333	19.49555556	19.48555556	19.18333333	19.57333333	19.23888889	19.45	19.13777778	19.38888889	19.32222222	19.18333333	19.30111111	19.25666667	18.97333333	19.32333333	19.12	19.00888889	19.35222222	18.79777778	19.25444444	19.40333333	19.94111111	18.47777778	19.48111111	18.76	19.16444444
8/11/2019 11:55:27	-118.5139082	42.54359356	1239.402032	-118.513894	42.543588	1234.480584	-118.513921	42.54358588	1238.104581	8/11/2019 11:56:26	21.04777778	20.30111111	20.29333333	20.54333333	20.39111111	19.97333333	20.43888889	20.03	19.69333333	19.84333333	20.01666667	20.08222222	20.17222222	19.95666667	19.95222222	19.85555556	19.61666667	19.95333333	19.47444444	19.87777778	19.53	19.85222222	19.94	19.58888889	19.72222222	19.67222222	19.38	19.77777778	19.54666667	19.43666667	19.74333333	19.20333333	19.76555556	19.36666667	20.23333333	18.94333333	20.18555556	19.45	19.89333333
8/11/2019 11:55:28	-118.5138776	42.54358323	1239.364226	-118.5138632	42.54357759	1234.439929	-118.5138772	42.54356518	1238.020419	8/11/2019 11:56:27	21.17333333	20.61444444	20.6	20.65666667	20.61888889	20.20777778	20.70555556	20.28333333	19.95444444	20.10666667	20.31444444	20.30555556	20.53666667	20.27888889	20.17666667	20.14333333	19.90888889	20.24333333	19.86333333	20.13666667	19.89222222	20.19	20.16111111	19.89333333	20.04222222	20.03222222	19.67555556	19.98	19.90666667	19.72222222	20	19.46333333	19.77333333	19.82111111	20.36111111	19.24888889	20.11444444	19.48	20.08555556
8/11/2019 11:55:29	-118.5138475	42.54357286	1239.3186	-118.5138335	42.54356737	1234.401233	-118.513846	42.54355378	1237.9486	8/11/2019 11:56:28	19.30222222	18.81222222	18.66444444	18.77777778	18.71222222	18.45111111	18.8	18.39777778	17.99111111	18.22222222	18.41222222	18.44777778	18.56444444	18.35666667	18.30222222	18.25888889	17.93555556	18.33777778	17.95333333	18.26555556	17.97	18.10888889	18.20333333	18.14444444	18.20888889	18.09444444	17.78333333	18.07444444	17.9	17.90111111	18.17444444	17.50666667	18.03888889	17.89111111	18.43222222	17.25777778	18.29888889	17.63333333	18.25777778
8/11/2019 11:55:30	-118.5138186	42.54356242	1239.25471	-118.513804	42.54355679	1234.358035	-118.5138059	42.54354398	1238.010419	8/11/2019 11:56:29	19.24444444	18.72444444	18.68222222	18.78333333	18.66	18.27222222	18.78333333	18.28666667	17.94777778	18.10666667	18.32111111	18.34	18.44	18.26555556	18.21666667	18.18333333	17.93555556	18.32666667	17.91444444	18.18555556	17.87111111	18.12444444	18.18555556	17.99444444	17.98444444	18.02444444	17.69222222	17.93444444	17.82666667	17.70111111	18.04555556	17.42222222	17.79888889	17.93777778	18.23666667	17.40333333	18.23666667	17.74444444	18.01111111
8/11/2019 11:55:31	-118.5137886	42.54355154	1239.159032	-118.513775	42.54354645	1234.295274	-118.5137751	42.54353342	1238.073484	8/11/2019 11:56:30	19.01333333	18.32	18.20666667	18.26555556	18.22666667	17.79888889	18.30555556	17.90222222	17.48777778	17.74555556	17.89666667	17.98222222	18.10888889	17.86111111	17.79222222	17.82777778	17.41222222	17.86888889	17.49666667	17.75555556	17.43777778	17.67555556	17.70444444	17.51111111	17.56222222	17.51111111	17.17555556	17.56888889	17.37333333	17.30333333	17.60444444	17.00444444	17.48	17.44333333	18.38222222	16.83777778	17.93222222	17.30777778	17.70333333
8/11/2019 11:55:32	-118.5137592	42.54354154	1239.054516	-118.5137456	42.54353665	1234.257226	-118.5137597	42.54352567	1237.97629	8/11/2019 11:56:31	19.09555556	18.27555556	18.34666667	18.44888889	18.30666667	17.86	18.31444444	17.96111111	17.51	17.71333333	17.94777778	17.94444444	18.07555556	17.93111111	17.82666667	17.93111111	17.53333333	17.84333333	17.52777778	17.82444444	17.46444444	17.68777778	17.76666667	17.51555556	17.70666667	17.62666667	17.29666667	17.58	17.49666667	17.33666667	17.7	17.07555556	17.63	17.44444444	18.38222222	17.34111111	18.21333333	17.5	17.87
8/11/2019 11:55:33	-118.5137305	42.54353224	1239.0102	-118.5137167	42.54352719	1234.28058	-118.5137296	42.54351746	1237.9982	8/11/2019 11:56:32	18.70111111	18.15666667	18.08555556	18.13111111	18.11333333	17.64444444	18.22	17.74888889	17.38888889	17.51222222	17.76333333	17.84	17.85666667	17.68333333	17.68	17.62	17.43444444	17.75	17.37111111	17.56111111	17.29	17.51	17.58555556	17.42	17.52222222	17.45777778	17.09444444	17.46888889	17.25333333	17.33111111	17.39888889	16.88	17.18666667	17.36666667	18.07222222	17.06777778	17.83222222	17.06666667	17.47666667
8/11/2019 11:55:34	-118.5137026	42.54352322	1239.000839	-118.5136875	42.54351782	1234.328426	-118.5137013	42.54350874	1238.050613	8/11/2019 11:56:33	18.454	18.042	17.944	18.137	17.96	17.528	18.022	17.489	17.18	17.477	17.533	17.612	17.744	17.531	17.39	17.479	17.094	17.411	17.115	17.412	17.054	17.303	17.315	17.165	17.228	17.221	16.874	17.169	17.056	16.947	17.139	16.59	17.076	17.185	17.81	16.711	17.509	16.984	17.356
8/11/2019 11:55:35	-118.513675	42.54351404	1239.043677	-118.5136609	42.54350903	1234.363694	-118.5136738	42.54349914	1238.088355	8/11/2019 11:56:34	18.99333333	18.42	18.32777778	18.38888889	18.30222222	17.84888889	18.35777778	17.93111111	17.54888889	17.66222222	17.89444444	17.84444444	18.01666667	17.90333333	17.85888889	17.77222222	17.41888889	17.81333333	17.47	17.68444444	17.44333333	17.53888889	17.68666667	17.51333333	17.48111111	17.62444444	17.23888889	17.55666667	17.36333333	17.33777778	17.60444444	16.94777778	17.53111111	17.33111111	18.18333333	16.86444444	17.98	17.18777778	17.67666667
8/11/2019 11:55:36	-118.5136479	42.54350456	1239.085806	-118.5136323	42.54349912	1234.375619	-118.513631	42.54348638	1238.232323	8/11/2019 11:56:35	18.89555556	18.22555556	18.17222222	18.38444444	18.31666667	17.74888889	18.32111111	17.81555556	17.51111111	17.59888889	17.85555556	17.87555556	17.97666667	17.80111111	17.75888889	17.78222222	17.47888889	17.77111111	17.32	17.73	17.33111111	17.49222222	17.67	17.36333333	17.47	17.48333333	17.11333333	17.45444444	17.29333333	17.13777778	17.35777778	16.87555556	17.25111111	17.34	18.10777778	17.01	17.73111111	17.19	17.38333333
8/11/2019 11:55:37	-118.5136216	42.54349554	1239.141903	-118.5136055	42.54349004	1234.386487	-118.5135941	42.54347603	1238.444419	8/11/2019 11:56:36	20.70555556	19.99111111	19.92666667	20.24444444	20.01777778	19.63777778	20.12333333	19.72333333	19.29888889	19.46444444	19.73444444	19.62555556	19.72	19.57777778	19.50888889	19.45111111	19.18222222	19.54777778	19.16444444	19.43777778	19.12	19.32111111	19.35111111	19.18222222	19.18	19.12111111	18.83333333	19.16777778	19.04333333	18.83888889	19.21222222	18.54333333	18.98333333	18.98333333	19.48777778	18.27111111	19.38777778	18.70333333	19.11111111
8/11/2019 11:55:38	-118.5135957	42.5434868	1239.167194	-118.5135799	42.54348131	1234.411474	-118.5135695	42.54346818	1238.623097	8/11/2019 11:56:37	18.11666667	17.28888889	17.44555556	17.45111111	17.39666667	16.95444444	17.50222222	17.00222222	16.62888889	16.84	16.94888889	16.92888889	17.12111111	16.92666667	16.88333333	16.70777778	16.54111111	16.78222222	16.43	16.75111111	16.39111111	16.56111111	16.65777778	16.32777778	16.53888889	16.56222222	16.13555556	16.34666667	16.34	16.25555556	16.47777778	15.87111111	16.28777778	16.57111111	17.06111111	16.06888889	17.14111111	16.17888889	16.54333333
8/11/2019 11:55:39	-118.5135737	42.54347946	1239.1888	-118.5135576	42.54347386	1234.460393	-118.513566	42.54346365	1238.639267	8/11/2019 11:56:38	17.50333333	16.82111111	16.71222222	16.97555556	16.76888889	16.24888889	16.81555556	16.43666667	16.08111111	16.16888889	16.39777778	16.45111111	16.49	16.32222222	16.21222222	16.19888889	15.80555556	16.19777778	15.79777778	16.06777778	15.73555556	15.92666667	15.97777778	15.80222222	15.81666667	15.72777778	15.52444444	15.79222222	15.66333333	15.45444444	15.70222222	15.08111111	15.64888889	15.51111111	16.44333333	15.14333333	16.35222222	15.51222222	15.92888889
8/11/2019 11:55:40	-118.5135599	42.54347448	1239.162903	-118.5135442	42.54346889	1234.493274	-118.5135548	42.54345628	1238.553935	8/11/2019 11:56:39	17.39666667	16.53222222	16.59666667	16.73	16.53333333	16.30333333	16.60555556	16.28444444	15.88444444	16.03666667	16.22777778	16.23222222	16.31111111	16.13222222	16.04	15.95111111	15.78	16.06333333	15.67111111	15.86666667	15.56555556	15.74444444	15.88666667	15.62777778	15.60777778	15.63777778	15.34444444	15.61111111	15.52666667	15.34777778	15.56777778	15	15.47333333	15.72222222	15.99777778	15.30666667	15.97111111	15.36666667	15.88888889
8/11/2019 11:55:41	-118.5135557	42.54347723	1239.155677	-118.5135396	42.54347164	1234.531603	-118.5135472	42.54346384	1238.471097	8/11/2019 11:56:40	17.46666667	16.84888889	16.57222222	16.87444444	16.62777778	16.37666667	16.87111111	16.46	15.93333333	16.18111111	16.38111111	16.35888889	16.40333333	16.22444444	16.13333333	16.17555556	15.79555556	16.13222222	15.75111111	16.02666667	15.68	15.90222222	15.96888889	15.70111111	15.89333333	15.80666667	15.43444444	15.73777778	15.59666667	15.47888889	15.77666667	15.09333333	15.71333333	15.89777778	16.65	15.22555556	16.19	15.39555556	15.89555556
8/11/2019 11:55:42	-118.5135455	42.54349392	1239.095484	-118.5135296	42.54348831	1234.582645	-118.5135264	42.54349207	1238.335935	8/11/2019 11:56:41	17.79777778	17.17444444	17.02111111	17.26333333	17.15222222	16.78111111	17.16777778	16.79555556	16.37444444	16.54111111	16.82555556	16.77666667	16.87666667	16.56111111	16.56	16.59888889	16.32555556	16.49444444	16.16111111	16.46	16.08222222	16.31222222	16.38222222	16.21777778	16.30222222	16.20111111	15.88888889	16.19111111	16	15.98666667	16.22888889	15.56444444	16.12444444	16.10666667	16.72777778	15.74888889	16.52444444	15.74222222	16.20333333
8/11/2019 11:55:43	-118.5135329	42.543516	1238.971065	-118.5135178	42.54350963	1234.588923	-118.513518	42.54350974	1238.255613	8/11/2019 11:56:42	17.832	17.318	17.39	17.333	17.246	16.733	17.359	16.941	16.541	16.668	16.948	16.927	17.017	16.846	16.754	16.682	16.438	16.752	16.395	16.542	16.237	16.511	16.5	16.311	16.378	16.345	16.001	16.405	16.18	16.146	16.342	15.763	16.267	16.289	16.868	15.759	16.917	15.948	16.524
8/11/2019 11:55:44	-118.5135312	42.54352464	1238.9302	-118.5135156	42.54351897	1234.52843	-118.5135167	42.54351086	1238.2008	8/11/2019 11:56:43	18.03888889	17.52111111	17.28222222	17.43888889	17.37222222	16.87111111	17.51666667	17.08444444	16.64	16.77555556	16.92666667	16.96333333	17.01777778	16.9	16.88	16.74222222	16.51333333	16.83666667	16.40222222	16.66	16.42777778	16.61	16.65777778	16.44	16.48222222	16.48777778	16.10777778	16.48666667	16.28666667	16.23111111	16.40666667	15.82777778	16.36333333	16.63888889	17.22444444	15.63333333	17.06444444	16.03888889	16.4
8/11/2019 11:55:45	-118.5135375	42.54352736	1238.877742	-118.513522	42.54352201	1234.488845	-118.5135239	42.54351332	1238.146452	8/11/2019 11:56:44	19.26333333	18.77333333	18.67888889	18.74111111	18.54	18.16555556	18.75555556	18.23	17.87222222	18.09333333	18.25333333	18.21444444	18.35333333	18.12444444	18.04111111	18.11555556	17.74666667	18.18333333	17.72333333	17.93444444	17.70333333	17.79555556	17.85111111	17.72777778	17.73333333	17.68888889	17.35111111	17.68444444	17.61	17.40222222	17.70444444	17.14666667	17.73777778	17.64111111	18.10777778	16.97777778	18.10444444	17.28777778	17.75666667
8/11/2019 11:55:46	-118.5135495	42.54353142	1238.819581	-118.513534	42.5435263	1234.418513	-118.5135362	42.54351919	1238.050194	8/11/2019 11:56:45	19.12666667	18.45222222	18.45777778	18.57111111	18.39111111	18.03333333	18.48333333	18.15333333	17.65888889	17.79888889	18.18666667	17.99222222	18.09555556	18.03777778	17.90444444	17.79444444	17.51111111	17.90777778	17.52555556	17.72	17.40222222	17.60444444	17.67777778	17.40111111	17.5	17.48888889	17.14	17.42333333	17.28333333	17.21555556	17.39777778	16.80888889	17.39	17.33888889	17.75666667	16.84666667	17.81666667	17.17333333	17.50333333
8/11/2019 11:55:47	-118.5135656	42.54353686	1238.819	-118.5135499	42.54353172	1234.35672	-118.5135521	42.54352546	1237.935	8/11/2019 11:56:46	18.17	17.60777778	17.77111111	17.57777778	17.53777778	17.09888889	17.65444444	17.23333333	16.81333333	17.04333333	17.20333333	17.26777778	17.36777778	17.16555556	17.08111111	16.97555556	16.77555556	17.01	16.69666667	16.91111111	16.61111111	16.92888889	16.89555556	16.66888889	16.66666667	16.85444444	16.44555556	16.71333333	16.52666667	16.45666667	16.68444444	16.14111111	16.71222222	16.54777778	17.19888889	16.10111111	16.93666667	16.33666667	16.75
8/11/2019 11:55:48	-118.5135852	42.54354333	1238.787839	-118.5135694	42.543538	1234.273219	-118.5135719	42.54353306	1237.791032	8/11/2019 11:56:47	18.62888889	17.93111111	18.08444444	18.19222222	17.77666667	17.52111111	18.01555556	17.78	17.22333333	17.38555556	17.72555556	17.64	17.77777778	17.64777778	17.55333333	17.54777778	17.17555556	17.55777778	17.19888889	17.45444444	17.23333333	17.29444444	17.43333333	17.25	17.24111111	17.29888889	17.01	17.32444444	17.07333333	17.05222222	17.25111111	16.77444444	17.12444444	17.47777778	17.82333333	16.40555556	17.41777778	16.78666667	17.33666667
8/11/2019 11:55:49	-118.5136054	42.54354985	1238.77104	-118.5135899	42.54354452	1234.235496	-118.513593	42.54354038	1237.67152	8/11/2019 11:56:48	18.67	18.25	18.28333333	18.31888889	18.27	17.77222222	18.18222222	17.81888889	17.45666667	17.67333333	17.78	17.83777778	17.98555556	17.76111111	17.68111111	17.73777778	17.45444444	17.73222222	17.39111111	17.57333333	17.32888889	17.51555556	17.58888889	17.42333333	17.51111111	17.45333333	17.20666667	17.49222222	17.28333333	17.19111111	17.57666667	16.88444444	17.41888889	17.28222222	18.02111111	16.68222222	17.93333333	17.21222222	17.49666667
8/11/2019 11:55:50	-118.5136294	42.54355726	1238.827162	-118.5136135	42.54355185	1234.23247	-118.5136147	42.54354943	1237.625811	8/11/2019 11:56:49	19.31333333	18.69777778	18.82333333	18.84888889	18.61333333	18.24666667	18.71666667	18.40555556	17.87444444	18.12777778	18.39777778	18.39888889	18.50888889	18.35888889	18.22888889	18.22777778	17.97666667	18.25	17.86111111	18.13	17.86444444	18.09333333	18.10444444	17.99111111	18.03111111	17.91	17.71555556	17.95333333	17.95333333	17.86888889	18.07222222	17.57666667	17.91	17.70444444	18.55333333	17.26444444	18.11888889	17.55777778	17.94555556
8/11/2019 11:55:51	-118.5136568	42.54356552	1238.927742	-118.5136404	42.54356009	1234.259052	-118.5136402	42.54356795	1237.830677	8/11/2019 11:56:50	19.30777778	18.61111111	18.57222222	18.73	18.51666667	18.28888889	18.67222222	18.29	17.93222222	18.03333333	18.35888889	18.35888889	18.48666667	18.25777778	18.20777778	18.16777778	17.96444444	18.22444444	17.87888889	18.09666667	17.82555556	18.01777778	18.07	17.91111111	18.00333333	17.96888889	17.60888889	17.94444444	17.83333333	17.61111111	17.97666667	17.47444444	17.78444444	17.68777778	18.57888889	17.12666667	18.13555556	17.81444444	18.07666667
8/11/2019 11:55:52	-118.5136815	42.54357278	1238.9298	-118.5136647	42.54356737	1234.20466	-118.5136678	42.54357934	1237.9282	8/11/2019 11:56:51	17.633	17.17	17.097	17.269	17.124	16.618	17.118	16.721	16.379	16.459	16.678	16.707	16.931	16.728	16.536	16.603	16.292	16.555	16.251	16.463	16.213	16.31	16.401	16.283	16.212	16.295	16.036	16.286	16.165	16.074	16.221	15.705	16.132	16.153	16.814	15.76	16.431	16.007	16.459
8/11/2019 11:55:53	-118.5137057	42.54358027	1238.883742	-118.5136885	42.54357489	1234.147658	-118.5136878	42.54357559	1237.900742	8/11/2019 11:56:52	17.46555556	16.95888889	16.88666667	17.02444444	16.77666667	16.42444444	16.80888889	16.39	16.11333333	16.22666667	16.53	16.47	16.62	16.52555556	16.33	16.36	16.1	16.38666667	16.05666667	16.17888889	15.92111111	16.20777778	16.16111111	16.06555556	16.02333333	16.00666667	15.77444444	16.04444444	16.01333333	15.85111111	16.10888889	15.45111111	15.97555556	16.02888889	16.82222222	15.51222222	16.73555556	15.73333333	16.13666667
8/11/2019 11:55:54	-118.5137292	42.54358826	1238.923645	-118.5137119	42.54358305	1234.190816	-118.5137099	42.54357549	1237.806387	8/11/2019 11:56:53	17.97777778	17.45222222	17.32444444	17.44	17.24111111	16.79444444	17.35444444	16.94777778	16.52555556	16.7	16.96888889	16.96333333	17.03111111	16.91777778	16.81	16.75888889	16.54444444	16.83666667	16.48888889	16.7	16.47111111	16.53555556	16.63333333	16.42888889	16.48444444	16.53222222	16.23666667	16.46444444	16.31	16.26333333	16.59888889	15.92555556	16.29333333	16.50555556	17.08888889	15.90444444	16.81333333	16.26111111	16.60888889
8/11/2019 11:55:55	-118.513753	42.54359649	1239.082548	-118.5137352	42.54359125	1234.288348	-118.5137322	42.54358277	1237.769258	8/11/2019 11:56:54	18.34	17.74666667	17.81777778	17.80222222	17.64111111	17.32111111	17.70666667	17.39666667	16.90666667	17.03666667	17.33777778	17.25444444	17.43888889	17.28111111	17.22111111	17.28	16.91222222	17.29444444	16.90888889	17.11444444	16.85888889	17.07444444	17.17444444	16.93222222	17.00111111	16.95666667	16.71	16.98333333	16.81	16.78	17.02	16.54555556	16.87222222	16.85555556	17.67777778	16.33111111	17.44	16.65888889	17.11
8/11/2019 11:55:56	-118.5137766	42.54360436	1239.175387	-118.5137586	42.5435992	1234.352619	-118.513756	42.54359107	1237.677484	8/11/2019 11:56:55	18.51444444	17.81	17.94	18.02	17.99777778	17.55444444	17.96444444	17.53333333	17.13666667	17.34777778	17.60888889	17.59333333	17.70222222	17.56333333	17.47222222	17.55444444	17.19444444	17.48666667	17.17333333	17.42333333	17.15222222	17.33333333	17.42777778	17.31333333	17.29333333	17.32333333	16.87555556	17.27444444	17.08	16.97	17.44	16.71111111	17.20111111	17.12111111	18.00444444	16.61	17.61222222	17.06	17.41
8/11/2019 11:55:57	-118.5137994	42.54361238	1239.2152	-118.5137809	42.54360714	1234.35078	-118.513779	42.54360034	1237.5506	8/11/2019 11:56:56	18.40777778	17.65222222	17.64888889	17.85888889	17.63333333	17.38777778	17.77444444	17.31444444	16.88555556	17.07666667	17.36777778	17.26777778	17.43777778	17.32555556	17.24333333	17.18	16.87	17.29222222	16.98444444	17.04888889	16.90777778	17.05	17.13666667	16.98888889	16.93111111	16.95111111	16.61444444	16.87777778	16.82666667	16.79888889	17.00444444	16.34	16.72777778	16.84888889	17.61888889	16.46222222	17.44111111	16.83888889	17.11
8/11/2019 11:55:58	-118.5138234	42.54362082	1239.306258	-118.5138034	42.54361516	1234.377594	-118.5138022	42.54361053	1237.501903	8/11/2019 11:56:57	18.79555556	18.43444444	18.26333333	18.36777778	18.18555556	17.77666667	18.13333333	17.82444444	17.52	17.58	17.86555556	17.87444444	17.92777778	17.78888889	17.59777778	17.68222222	17.38111111	17.65111111	17.32666667	17.42777778	17.28222222	17.46888889	17.49888889	17.35	17.33666667	17.35444444	17.09	17.38222222	17.25666667	17.15777778	17.47777778	16.78666667	17.28888889	17.48555556	18.15111111	16.90555556	17.87111111	17.11888889	17.57666667
8/11/2019 11:55:59	-118.5138482	42.54362843	1239.352806	-118.5138293	42.54362323	1234.407377	-118.5138254	42.54361974	1237.581387	8/11/2019 11:56:58	18.36555556	17.91777778	17.88777778	17.88111111	17.70777778	17.43555556	17.88222222	17.39444444	17.09222222	17.29555556	17.39555556	17.54555556	17.54111111	17.43555556	17.34666667	17.26888889	17.04666667	17.23444444	17.01	17.19	16.92333333	17.05111111	17.13555556	16.97	17.12	17.02222222	16.69888889	16.98	16.90333333	16.81888889	17.03222222	16.43222222	16.86777778	17.02222222	17.72888889	16.68444444	17.46555556	16.93888889	17.03
8/11/2019 11:56:00	-118.5138727	42.54363695	1239.300903	-118.5138541	42.54363196	1234.377145	-118.5138506	42.54362883	1237.571387	8/11/2019 11:56:59	18.39555556	17.86666667	17.83555556	17.99444444	17.72555556	17.30888889	17.84111111	17.43444444	17.06222222	17.20222222	17.39555556	17.45888889	17.53333333	17.47555556	17.27111111	17.20555556	16.99555556	17.31333333	16.98333333	17.18111111	16.92888889	17.1	17.26777778	17.00777778	17.07888889	17.05444444	16.74888889	17.04777778	16.91	16.95444444	17.09333333	16.49555556	16.90555556	16.78555556	17.76444444	16.42222222	17.39444444	16.83222222	17.25
8/11/2019 11:56:01	-118.5138981	42.54364546	1239.2616	-118.5138794	42.54364045	1234.3326	-118.5138746	42.54363712	1237.5738	8/11/2019 11:57:00	18.25333333	17.60888889	17.64111111	17.72111111	17.61444444	17.21333333	17.7	17.24444444	16.88111111	16.96666667	17.24444444	17.28555556	17.41777778	17.24333333	17.17	17.10555556	16.86777778	17.15888889	16.89666667	17.00777778	16.80666667	16.93222222	17.01111111	16.85333333	16.92666667	16.84888889	16.52333333	16.76111111	16.75333333	16.74555556	17.04777778	16.45111111	16.93333333	16.95444444	17.56777778	16.47888889	17.61888889	16.75888889	17.21666667
8/11/2019 11:56:02	-118.5139247	42.5436538	1239.275419	-118.513906	42.54364872	1234.292845	-118.5139082	42.54364406	1237.456484	8/11/2019 11:57:01	19.229	18.661	18.404	18.681	18.422	18.111	18.597	18.212	17.861	18.04	18.319	18.243	18.335	18.193	18.086	18.068	17.839	18.157	17.883	18.013	17.687	17.974	17.971	17.802	17.904	17.877	17.555	17.941	17.737	17.69	18.089	17.31	17.744	17.708	18.364	17.125	18.372	17.797	18.052
8/11/2019 11:56:03	-118.5139528	42.5436629	1239.310258	-118.5139343	42.54365796	1234.305194	-118.5139306	42.54364013	1237.209935	8/11/2019 11:57:02	18.45777778	17.75333333	18.00444444	17.89777778	17.74666667	17.35222222	17.75777778	17.43	17.06777778	17.12444444	17.43777778	17.39555556	17.52888889	17.36555556	17.23333333	17.28777778	16.88	17.37	16.95222222	17.14111111	16.91555556	17.02666667	17.22666667	17.06444444	17.04222222	16.99111111	16.82	16.99444444	16.85666667	16.78555556	17.12	16.53888889	16.82	17.24111111	17.74666667	16.87111111	17.59777778	16.93666667	17.19666667
8/11/2019 11:56:04	-118.5139814	42.54367238	1239.315355	-118.5139629	42.54366758	1234.28021	-118.5139536	42.54364166	1236.921677	8/11/2019 11:57:03	18.58888889	17.61777778	17.72333333	17.79	17.67	17.39888889	17.80777778	17.48	17.02666667	17.27888889	17.41	17.36777778	17.50222222	17.31888889	17.33666667	17.26666667	16.99111111	17.26888889	16.93333333	17.17	16.93333333	17.02111111	17.10444444	16.94111111	16.93666667	17.02111111	16.64666667	16.91555556	16.88	16.75777778	17.10444444	16.38111111	16.76444444	17.02444444	17.9	16.46333333	17.33333333	16.99777778	17.24333333
8/11/2019 11:56:05	-118.5140103	42.54368218	1239.3584	-118.5139917	42.54367758	1234.287937	-118.5139668	42.54365084	1236.8082	8/11/2019 11:57:04	18.82111111	18.15555556	18.03222222	18.21666667	18.10666667	17.65888889	18.14555556	17.61111111	17.32555556	17.40444444	17.74777778	17.63666667	17.69777778	17.57666667	17.45111111	17.42333333	17.18	17.52222222	17.2	17.47222222	17.09333333	17.33777778	17.36	17.14444444	17.22777778	17.20666667	16.81666667	17.18	17.02666667	17.00555556	17.30777778	16.77777778	17.12111111	17.26777778	18.05555556	17.07666667	17.80777778	17.11333333	17.51
8/11/2019 11:56:06	-118.5140411	42.54369215	1239.439355	-118.5140227	42.54368785	1234.328081	-118.5139949	42.5436626	1236.787903	8/11/2019 11:57:05	18.52666667	17.84666667	17.83	18.03555556	17.78555556	17.38333333	17.78444444	17.45111111	17.06777778	17.30777778	17.47888889	17.46666667	17.41111111	17.43111111	17.32111111	17.35666667	17.01	17.31444444	16.99333333	17.14555556	16.84666667	17.05666667	17.15333333	17.00222222	17.10333333	17.00111111	16.73777778	17.10111111	16.99333333	16.86666667	17.03111111	16.51888889	17.04555556	17.41	17.73888889	16.77333333	17.60666667	17.05	17.41
8/11/2019 11:56:07	-118.514074	42.54370302	1239.477452	-118.5140557	42.54369882	1234.357665	-118.5140425	42.5436832	1236.717677	8/11/2019 11:57:06	18.06555556	17.43111111	17.38777778	17.59888889	17.45	17.03777778	17.32444444	17.02333333	16.68444444	16.79777778	17.04666667	17.01444444	17.08888889	16.93888889	16.88444444	16.89444444	16.55	16.86777778	16.46	16.64888889	16.45555556	16.65666667	16.69	16.53444444	16.60666667	16.54555556	16.23888889	16.53	16.38666667	16.36444444	16.73444444	16.01222222	16.42888889	16.53333333	17.27666667	16.22555556	17.14111111	16.32555556	16.83
8/11/2019 11:56:08	-118.5141068	42.54371484	1239.489581	-118.5140887	42.54371074	1234.357213	-118.514094	42.54371142	1236.692548	8/11/2019 11:57:07	17.15888889	16.58222222	16.37	16.56	16.43111111	16.06555556	16.39222222	16.04111111	15.65666667	15.75	15.99111111	16.02333333	16.04444444	15.96555556	15.79888889	15.82	15.47	15.77555556	15.42111111	15.62	15.39444444	15.48888889	15.62555556	15.38	15.46444444	15.47666667	15.11	15.49222222	15.26666667	15.27222222	15.4	14.94333333	15.31	15.38666667	16.00555556	15.15	15.96333333	15.43222222	15.56
8/11/2019 11:56:09	-118.5141382	42.54372668	1239.4714	-118.5141198	42.5437226	1234.3279	-118.5141324	42.54373072	1236.626067	8/11/2019 11:57:08	17.18333333	16.74444444	16.63333333	16.75222222	16.65666667	16.25666667	16.59888889	16.13777778	15.78888889	15.84555556	16.12888889	16.04888889	16.23	15.97	15.96222222	15.92666667	15.58666667	15.89333333	15.57222222	15.71	15.54666667	15.60111111	15.70333333	15.50888889	15.57333333	15.58	15.33888889	15.44555556	15.32	15.31555556	15.63333333	14.99	15.58444444	15.52555556	16.49333333	15.39	15.97888889	15.28	15.90777778
8/11/2019 11:56:10	-118.5141697	42.54373833	1239.450194	-118.514152	42.54373453	1234.312184	-118.5141697	42.54373639	1236.330548	8/11/2019 11:57:09	17.31444444	16.59444444	16.50444444	16.61111111	16.49555556	16.15111111	16.56666667	16.14	15.70555556	15.89333333	16.08	15.95333333	16.18666667	16.02333333	15.93777778	15.83555556	15.53666667	15.83	15.50666667	15.73333333	15.45111111	15.57444444	15.61444444	15.52777778	15.52666667	15.44111111	15.15333333	15.42333333	15.25666667	15.17222222	15.43333333	14.97	15.37333333	15.52666667	16.34888889	15.13333333	16.07222222	15.19333333	15.6
8/11/2019 11:56:11	-118.5142026	42.54375028	1239.437323	-118.5141849	42.54374651	1234.290477	-118.5141944	42.54373725	1235.961581	8/11/2019 11:57:10	17.57333333	16.94888889	16.99111111	16.94444444	16.89333333	16.49666667	16.83111111	16.43222222	16.09444444	16.16555556	16.44222222	16.29222222	16.34888889	16.24222222	16.11888889	16.14111111	15.80333333	16.10444444	15.79777778	15.98666667	15.75555556	15.88444444	15.97555556	15.75444444	15.84333333	15.84333333	15.5	15.72666667	15.55666667	15.56555556	15.83222222	15.22555556	15.44222222	15.73666667	16.65888889	15.38888889	16.35222222	15.64333333	16.07777778
8/11/2019 11:56:12	-118.5142356	42.54376165	1239.439742	-118.514218	42.54375798	1234.270216	-118.5142129	42.5437451	1235.791645	8/11/2019 11:57:11	16.596	15.853	15.952	16.16	15.813	15.398	15.857	15.477	15.17	15.219	15.523	15.329	15.426	15.397	15.24	15.213	14.961	15.162	14.832	15.039	14.813	14.99	14.953	14.82	14.92	14.831	14.513	14.8	14.704	14.612	14.865	14.394	14.66	14.963	15.88	14.653	15.534	14.766	15.084
8/11/2019 11:56:13	-118.5142682	42.54377288	1239.4334	-118.5142505	42.54376909	1234.257613	-118.5142327	42.54375725	1235.883067	8/11/2019 11:57:12	17.75777778	17.06	17.10222222	17.19888889	17.06666667	16.57777778	16.88555556	16.42444444	16.22555556	16.29111111	16.47111111	16.42555556	16.45888889	16.37444444	16.29555556	16.29444444	15.88888889	16.14333333	15.88444444	16.10666667	15.87444444	16.03333333	16.15333333	15.84	16.04777778	15.90555556	15.62	15.90444444	15.74666667	15.69222222	15.97222222	15.3	15.87222222	16.12222222	17.01111111	15.70777778	16.54666667	15.93888889	16.04888889
8/11/2019 11:56:14	-118.5143009	42.54378466	1239.480645	-118.5142834	42.54378091	1234.269174	-118.5142763	42.5437797	1236.082581	8/11/2019 11:57:13	16.67444444	16.05888889	16.14888889	16.08444444	16.06555556	15.63666667	16.00111111	15.63666667	15.12666667	15.20555556	15.51	15.47444444	15.51444444	15.45666667	15.22666667	15.21777778	14.97666667	15.30111111	14.87666667	15.07222222	14.81777778	15.04666667	15.06333333	14.95111111	14.94555556	14.89666667	14.69111111	14.94222222	14.75666667	14.73888889	15.03222222	14.50222222	14.78333333	15.20444444	16.03111111	14.95555556	15.82333333	14.88333333	15.30111111
8/11/2019 11:56:15	-118.5143347	42.54379732	1239.507871	-118.5143172	42.54379362	1234.309523	-118.5143092	42.54379206	1236.314968	8/11/2019 11:57:14	15.78111111	15.08666667	15.33777778	15.36666667	15.17333333	14.74222222	15.16333333	14.73888889	14.45777778	14.46333333	14.71	14.66777778	14.76333333	14.63333333	14.52777778	14.56666667	14.16444444	14.48	14.20555556	14.38	14.12444444	14.29222222	14.34666667	14.18555556	14.14444444	14.28222222	13.96222222	14.20333333	14.10666667	13.90222222	14.35222222	13.74777778	14.00777778	14.38666667	15.23444444	14.33	14.94444444	14.27111111	14.38
8/11/2019 11:56:16	-118.5143699	42.54381012	1239.571355	-118.5143512	42.54380608	1234.3513	-118.5143424	42.54379331	1236.390677	8/11/2019 11:57:15	15.66111111	15.13777778	15.09111111	15.22888889	15.08444444	14.74	15.01777778	14.55666667	14.31555556	14.37444444	14.61555556	14.57	14.64888889	14.50888889	14.39666667	14.32444444	14.12444444	14.39222222	14.13777778	14.17444444	13.99111111	14.22777778	14.29888889	14.10666667	14.14222222	14.16555556	13.84666667	14.15333333	13.96666667	13.88333333	14.24666667	13.63777778	13.99111111	14.21666667	15.09777778	13.75777778	14.79666667	13.90222222	14.49333333
8/11/2019 11:56:17	-118.5144056	42.54382258	1239.6062	-118.514388	42.54381911	1234.3554	-118.5143944	42.5438113	1236.3212	8/11/2019 11:57:16	15.55	15.12	14.87777778	15.20666667	15.04888889	14.54777778	14.97	14.61444444	14.13888889	14.25111111	14.48777778	14.42111111	14.60333333	14.5	14.26	14.34666667	14.01222222	14.34222222	13.96444444	14.13111111	13.89555556	14.13777778	14.25444444	14.06	13.96111111	14.08	13.75888889	14.05333333	14.00333333	13.94777778	14.25222222	13.58777778	13.93888889	14.42111111	15.10555556	13.71666667	14.90555556	14.11444444	14.44666667
8/11/2019 11:56:18	-118.5144413	42.54383494	1239.657032	-118.5144235	42.5438313	1234.379458	-118.5144353	42.54383047	1236.285484	8/11/2019 11:57:17	16.14222222	15.68555556	15.59888889	15.69666667	15.52777778	15.03666667	15.43333333	15.02888889	14.73777778	14.89444444	15.09333333	14.98222222	15.15777778	15.00111111	14.86888889	14.86444444	14.59	14.79888889	14.59444444	14.78	14.47333333	14.6	14.7	14.54555556	14.64222222	14.51444444	14.27777778	14.57777778	14.43	14.37333333	14.68666667	14.10444444	14.52555556	14.47111111	15.43111111	14.40444444	14.96	14.62555556	14.95333333
8/11/2019 11:56:19	-118.5144781	42.54384758	1239.692355	-118.5144605	42.54384397	1234.389355	-118.5144671	42.5438449	1236.29971	8/11/2019 11:57:18	16.64111111	15.89444444	15.91555556	16.05333333	16.05777778	15.58777778	15.87	15.43888889	15.14111111	15.23666667	15.51	15.42555556	15.47777778	15.45111111	15.24888889	15.28	15.00222222	15.23	14.97333333	15.04555556	14.85444444	15.01	15.18777778	14.88777778	14.95222222	14.97444444	14.68111111	14.97555556	14.86	14.68777778	15.01111111	14.43555556	14.93777778	15.25888889	16.15333333	14.84666667	15.50444444	14.81888889	15.02
8/11/2019 11:56:20	-118.5145146	42.54385994	1239.736194	-118.5144972	42.54385638	1234.393781	-118.5144951	42.54385615	1236.376484	8/11/2019 11:57:19	16.56111111	16.14111111	16.07333333	16.15444444	15.90555556	15.67444444	15.93777778	15.53333333	15.24222222	15.33888889	15.60222222	15.56333333	15.62555556	15.54444444	15.42111111	15.37111111	15.11555556	15.40333333	15.1	15.18666667	14.91777778	15.04	15.28777778	15.10333333	15.14666667	15.21222222	14.78888889	15.15333333	14.92333333	14.90333333	15.18	14.6	14.95666667	15.28222222	16.34888889	14.90444444	15.76888889	14.85444444	15.39333333
8/11/2019 11:56:21	-118.5145509	42.54387192	1239.760548	-118.5145337	42.54386848	1234.384406	-118.5145271	42.54386768	1236.475097	8/11/2019 11:57:20	16.66666667	15.98222222	15.91777778	16.12666667	15.86	15.65111111	15.95666667	15.47777778	15.20666667	15.38111111	15.58222222	15.47111111	15.70555556	15.51	15.32777778	15.44555556	15.09333333	15.37	15.10777778	15.18111111	15	15.15	15.22777778	15.02	15.11888889	15.08111111	14.75888889	15.09222222	14.89666667	14.93555556	15.20222222	14.62666667	14.97333333	15.40666667	16.02222222	14.66888889	15.78444444	14.91222222	15.21333333
8/11/2019 11:56:22	-118.5145868	42.54388388	1239.7746	-118.5145698	42.54388032	1234.38328	-118.5145617	42.54387992	1236.5586	8/11/2019 11:57:21	16.19888889	15.67444444	15.46888889	15.79777778	15.57333333	15.22333333	15.58333333	15.13444444	14.76	14.99666667	15.13	15.1	15.17888889	15.06111111	15.01444444	14.95777778	14.68111111	15.01444444	14.60333333	14.77777778	14.56111111	14.76333333	14.85888889	14.69333333	14.73555556	14.82777778	14.41222222	14.69111111	14.53666667	14.46222222	14.73555556	14.19111111	14.54111111	14.80555556	15.46666667	14.84777778	15.50444444	14.72555556	14.91333333
8/11/2019 11:56:23	-118.5146228	42.54389596	1239.778097	-118.5146055	42.54389211	1234.369994	-118.5146056	42.54389201	1236.570129	8/11/2019 11:57:22	16.242	15.883	15.602	15.868	15.73	15.272	15.707	15.256	14.898	15.065	15.311	15.273	15.27	15.225	15.151	15.111	14.814	15.071	14.757	14.915	14.734	14.912	14.891	14.709	14.788	14.77	14.5	14.804	14.644	14.473	14.88	14.269	14.61	14.95	15.5	14.535	15.359	14.608	14.892
8/11/2019 11:56:24	-118.5146596	42.54390846	1239.793742	-118.5146422	42.54390451	1234.348758	-118.5146678	42.54390695	1236.327613	8/11/2019 11:57:23	16.16777778	15.64333333	15.58111111	15.71888889	15.68222222	15.23333333	15.57444444	15.13888889	14.85	15.05777778	15.27222222	15.19	15.24666667	15.19111111	15.07555556	15.06222222	14.68555556	15.04666667	14.70111111	14.89555556	14.70111111	14.82888889	14.77777778	14.76777778	14.67555556	14.77888889	14.43888889	14.64	14.59666667	14.42222222	14.84555556	14.12888889	14.43777778	14.68666667	15.40555556	14.29	15.18555556	14.70222222	14.92
8/11/2019 11:56:25	-118.5146968	42.54392068	1239.890097	-118.5146792	42.54391679	1234.356232	-118.5147013	42.54391108	1236.068935	8/11/2019 11:57:24	16.36666667	15.98333333	15.86444444	15.96333333	15.87	15.44111111	15.8	15.36333333	15.05333333	15.15444444	15.52888889	15.39333333	15.51111111	15.28666667	15.14222222	15.18111111	14.87333333	15.24444444	14.91666667	15.09666667	14.79777778	15.01222222	15.07	14.81	14.84444444	14.87111111	14.58666667	14.80888889	14.83333333	14.67555556	15.04555556	14.30666667	14.79222222	14.84777778	15.61333333	14.53666667	15.40333333	14.70777778	15.03333333
8/11/2019 11:56:26	-118.5147348	42.54393247	1239.944677	-118.5147171	42.5439288	1234.313774	-118.5147404	42.54392127	1235.728613	8/11/2019 11:57:25	16.41111111	15.59222222	15.82444444	15.86111111	15.84555556	15.48777778	15.77333333	15.32	15.10222222	15.25	15.4	15.33666667	15.36222222	15.38888889	15.19777778	15.23777778	14.96111111	15.19666667	14.91888889	15.04888889	14.77111111	14.97444444	15.04111111	14.83222222	14.93444444	14.94	14.60111111	14.88333333	14.72	14.65111111	14.96333333	14.34222222	14.68111111	14.86777778	15.60444444	14.39777778	15.48111111	14.66777778	15.2
8/11/2019 11:56:27	-118.5147727	42.54394415	1239.880516	-118.5147549	42.5439407	1234.203571	-118.5147661	42.54392971	1235.458839	8/11/2019 11:57:26	17.07888889	16.48222222	16.40555556	16.53333333	16.43444444	16.16333333	16.44555556	16.04333333	15.69222222	15.84333333	16.13111111	16.1	16.14444444	16.08444444	15.90222222	15.85666667	15.62333333	15.84333333	15.45111111	15.71444444	15.52777778	15.60444444	15.68555556	15.46555556	15.51222222	15.56777778	15.14333333	15.52888889	15.33333333	15.34111111	15.49555556	14.84777778	15.32111111	15.48444444	16.16111111	15.16555556	16.02666667	15.11666667	15.45444444
8/11/2019 11:56:28	-118.5148088	42.54395576	1239.8288	-118.5147893	42.54395194	1234.15764	-118.5147994	42.54394038	1235.2884	8/11/2019 11:57:27	17.88333333	17.50777778	17.31222222	17.43888889	17.50111111	16.98	17.35222222	16.87666667	16.69777778	16.79666667	17.01666667	16.94333333	17	16.92444444	16.74555556	16.86777778	16.52111111	16.79444444	16.50555556	16.67	16.43222222	16.56555556	16.64777778	16.43666667	16.43	16.42444444	16.09555556	16.35444444	16.27	16.13666667	16.47333333	15.83555556	16.11555556	16.35666667	16.97555556	15.75777778	16.74333333	16.05555556	16.34
8/11/2019 11:56:29	-118.514844	42.54396723	1239.810742	-118.5148258	42.54396385	1234.185845	-118.5148321	42.54395077	1235.195968	8/11/2019 11:57:28	18.01	17.48222222	17.48	17.63111111	17.42222222	17.32888889	17.49333333	17.17444444	16.83888889	16.99333333	17.23111111	17.17777778	17.23777778	17.14555556	17.02333333	17.05	16.76	17.07555556	16.85333333	16.89333333	16.67111111	16.80111111	16.93777778	16.76111111	16.76	16.72888889	16.46777778	16.70777778	16.53	16.46111111	16.77666667	16.11666667	16.43666667	16.66444444	17.19888889	16.09333333	16.87555556	16.31222222	16.72111111
8/11/2019 11:56:30	-118.5148757	42.54397762	1239.8278	-118.5148575	42.54397424	1234.243508	-118.5148623	42.54396004	1235.16036	8/11/2019 11:57:29	17.89	17.34444444	17.33555556	17.47222222	17.36555556	16.95555556	17.38333333	16.84444444	16.60666667	16.80333333	16.98444444	16.88222222	16.98222222	16.92444444	16.77555556	16.78888889	16.46666667	16.81777778	16.5	16.62555556	16.42777778	16.52111111	16.58555556	16.36777778	16.44555556	16.51444444	16.12333333	16.41222222	16.25	16.22333333	16.43777778	15.82111111	16.19444444	16.27333333	16.89	15.90555556	16.69444444	16.14333333	16.19666667
8/11/2019 11:56:31	-118.5149103	42.54398834	1239.829297	-118.5148922	42.54398513	1234.282324	-118.5149079	42.54398096	1235.176541	8/11/2019 11:57:30	19.18111111	18.61111111	18.8	18.75777778	18.59555556	18.34	18.75888889	18.22	18.00888889	18.15	18.35	18.34666667	18.41666667	18.33222222	18.18555556	18.16	17.96888889	18.21888889	17.85666667	18.06	17.86333333	18.02333333	18.02666667	17.90222222	17.84777778	17.82111111	17.59555556	17.86	17.72333333	17.64111111	17.90666667	17.33666667	17.72666667	17.75777778	18.13333333	17.40444444	17.90222222	17.51111111	17.87666667
8/11/2019 11:56:32	-118.5149481	42.5440001	1239.8296	-118.5149303	42.54399716	1234.32044	-118.5149478	42.54399736	1235.2156	8/11/2019 11:57:31	17.04555556	16.62	16.45555556	16.78333333	16.68888889	16.25666667	16.54222222	16.23888889	15.85666667	15.93333333	16.30888889	16.14333333	16.21	16.1	16.01	15.93666667	15.71111111	15.99444444	15.69	15.78	15.54888889	15.68777778	15.82777778	15.61888889	15.64666667	15.53222222	15.23222222	15.55222222	15.43666667	15.39111111	15.67333333	15.00444444	15.32111111	15.41444444	16.17	15.35555556	15.89444444	15.13888889	15.66111111
8/11/2019 11:56:33	-118.5149829	42.54401107	1239.922903	-118.5149648	42.54400815	1234.403874	-118.5149773	42.54400474	1235.269806	8/11/2019 11:57:32	16.478	15.877	15.867	15.921	15.886	15.489	15.844	15.288	15.145	15.088	15.527	15.366	15.407	15.3	15.253	15.126	14.844	15.11	14.852	14.853	14.731	14.813	14.903	14.762	14.83	14.681	14.331	14.549	14.536	14.54	14.739	14.113	14.42	14.718	15.16	14.307	15.226	14.378	14.754
8/11/2019 11:56:34	-118.5150177	42.54402245	1239.960258	-118.5149998	42.54401961	1234.428119	-118.5150118	42.54401646	1235.292677	8/11/2019 11:57:33	15.93666667	15.32777778	15.42222222	15.54777778	15.31777778	14.96222222	15.29333333	14.92	14.65555556	14.80666667	14.96555556	14.97222222	15.02222222	14.87	14.76555556	14.65555556	14.34555556	14.68222222	14.38222222	14.42444444	14.15777778	14.32666667	14.40333333	14.18555556	14.27666667	14.21222222	13.90222222	14.17777778	14.08444444	13.88666667	14.20777778	13.51	13.87222222	14.17666667	14.82222222	13.34111111	14.60888889	13.71666667	14.19222222
8/11/2019 11:56:35	-118.5150523	42.54403414	1239.931968	-118.5150345	42.54403119	1234.415855	-118.5150443	42.54402862	1235.290516	8/11/2019 11:57:34	16.21888889	15.78222222	15.70666667	15.75444444	15.87888889	15.34777778	15.70333333	15.40555556	14.99333333	15.18777778	15.36333333	15.19666667	15.30777778	15.19555556	15.07555556	15.04888889	14.79777778	15.05333333	14.77666667	14.79	14.72333333	14.75777778	14.84	14.68333333	14.71111111	14.68	14.41333333	14.53111111	14.46333333	14.28333333	14.66888889	14.05777778	14.32444444	14.48222222	15.27555556	14.20888889	15.01444444	14.21777778	14.82
8/11/2019 11:56:36	-118.5150866	42.54404613	1239.899419	-118.5150679	42.54404262	1234.39919	-118.5150707	42.54403849	1235.332323	8/11/2019 11:57:35	16.85777778	16.19111111	16.14333333	16.23888889	16.07555556	15.73666667	16.15555556	15.76	15.46888889	15.61666667	15.86555556	15.71777778	15.82444444	15.73111111	15.56111111	15.55111111	15.36444444	15.57777778	15.26777778	15.38111111	15.14666667	15.32111111	15.33222222	15.12888889	15.24444444	15.23111111	14.95555556	15.10111111	15.06666667	14.91333333	15.21111111	14.48111111	14.84888889	14.81333333	15.78444444	14.58444444	15.73	14.82444444	15.29333333
8/11/2019 11:56:37	-118.5151208	42.54405752	1239.8942	-118.515103	42.54405418	1234.387453	-118.5151039	42.54404959	1235.408	8/11/2019 11:57:36	16.99111111	16.57	16.44555556	16.92777778	16.72111111	16.32	16.68777778	16.23	16.00888889	16.09222222	16.31666667	16.21222222	16.32888889	16.18	16.13444444	16.03555556	15.87111111	16.07555556	15.84888889	15.94666667	15.66555556	15.83555556	15.81777778	15.74666667	15.69555556	15.79888889	15.37666667	15.62333333	15.54	15.50111111	15.73111111	15.19444444	15.41	15.40777778	16.05222222	15.17666667	16.04111111	15.27333333	15.59333333
8/11/2019 11:56:38	-118.5151551	42.54406906	1239.903839	-118.5151371	42.54406547	1234.359219	-118.5151563	42.54406472	1235.319774	8/11/2019 11:57:37	16.89666667	16.55666667	16.45666667	16.52222222	16.46333333	16.07333333	16.44555556	15.96111111	15.80555556	15.89222222	16.07888889	16.05666667	16.13444444	16.01111111	15.76	15.75777778	15.50777778	15.72222222	15.54777778	15.63555556	15.43222222	15.53111111	15.58333333	15.41	15.40333333	15.45888889	15.14333333	15.34	15.21333333	15.12222222	15.43444444	14.91111111	15.09222222	14.96555556	15.89555556	14.63555556	15.78444444	14.93555556	15.35333333
8/11/2019 11:56:39	-118.5151898	42.5440808	1239.90429	-118.515172	42.54407732	1234.30149	-118.5151914	42.54407541	1235.167806	8/11/2019 11:57:38	17.23888889	16.98555556	16.74333333	17.07777778	17.02333333	16.46666667	16.92444444	16.47222222	16.23333333	16.37777778	16.58666667	16.49444444	16.57777778	16.37	16.23222222	16.26777778	16.09	16.33888889	16.01666667	16.16111111	15.87222222	15.99111111	16.05666667	15.84777778	16.05	15.91111111	15.60555556	15.82777778	15.72333333	15.77444444	16.02666667	15.35777778	15.63	15.56666667	16.08444444	15.48777778	16.25222222	15.56666667	15.87555556
8/11/2019 11:56:40	-118.5152214	42.54409098	1239.88524	-118.5152018	42.54408707	1234.26882	-118.5152106	42.54408428	1235.15132	8/11/2019 11:57:39	17.47777778	16.84666667	16.98111111	16.94444444	16.93111111	16.66444444	16.81888889	16.5	16.20111111	16.41	16.58111111	16.59666667	16.64555556	16.47777778	16.41777778	16.28111111	16.07444444	16.22777778	16.11666667	16.09666667	15.96333333	16.01444444	16.16555556	15.95777778	15.92333333	15.92888889	15.63	15.84777778	15.70666667	15.66222222	16.02666667	15.33	15.48111111	15.86888889	16.37555556	15.04444444	16.32111111	15.69333333	15.87444444
8/11/2019 11:56:41	-118.5152558	42.54410213	1239.914333	-118.515235	42.54409791	1234.250778	-118.515253	42.54410031	1235.182889	8/11/2019 11:57:40	17.79222222	17.27333333	17.22333333	17.57666667	17.36111111	17.04666667	17.39111111	16.98222222	16.75444444	16.81555556	17.06444444	16.99111111	17.01555556	16.94888889	16.72555556	16.80666667	16.48666667	16.82222222	16.43555556	16.68	16.35666667	16.47222222	16.63222222	16.44	16.51888889	16.35555556	16.08444444	16.31555556	16.20666667	16.13777778	16.51666667	15.95777778	16.14333333	16.16444444	16.96888889	15.91222222	16.71777778	16.11333333	16.39888889
8/11/2019 11:56:42	-118.5152868	42.54411266	1240.023	-118.5152687	42.54410932	1234.271797	-118.5153254	42.54410748	1235.242613	8/11/2019 11:57:41	17.23333333	16.53111111	16.40111111	16.78444444	16.63666667	16.20222222	16.54666667	16.02111111	15.89111111	16.05333333	16.28777778	16.20222222	16.23666667	16.06444444	16.02444444	16.02666667	15.68111111	16.05111111	15.75333333	15.87777778	15.66444444	15.77	15.82777778	15.56555556	15.68777778	15.78666667	15.32444444	15.60444444	15.54	15.44222222	15.76111111	15.14333333	15.44777778	15.48333333	16.04222222	15.10222222	16.05666667	15.28444444	15.74
8/11/2019 11:56:43	-118.5152921	42.54412469	1239.946129	-118.5152746	42.54412122	1234.232781	-118.5153427	42.54411583	1235.318161	8/11/2019 11:57:42	17.624	17.299	16.993	17.241	17.052	16.791	17.114	16.715	16.418	16.629	16.797	16.678	16.872	16.749	16.544	16.519	16.231	16.537	16.237	16.251	16.063	16.254	16.308	16.19	16.156	16.133	15.858	16.037	15.925	15.844	16.084	15.532	15.79	15.762	16.536	15.354	16.445	15.616	15.914
8/11/2019 11:56:44	-118.5152828	42.54414938	1239.965935	-118.5152659	42.54414568	1234.276768	-118.5153262	42.54414122	1235.484839	8/11/2019 11:57:43	18.15222222	17.81555556	17.55555556	17.81777778	17.68333333	17.28666667	17.63666667	17.20888889	17.03	17.21	17.42	17.27777778	17.34444444	17.17888889	17.06777778	17.08555556	16.77888889	17.03555556	16.76	16.79777778	16.62222222	16.64555556	16.81666667	16.68444444	16.64777778	16.69777778	16.3	16.52555556	16.43666667	16.39888889	16.47888889	16.04777778	16.21333333	16.11333333	16.96	15.64222222	16.70333333	16.02666667	16.23777778
8/11/2019 11:56:45	-118.5152683	42.54417805	1240.014258	-118.5152525	42.54417303	1234.294942	-118.5153073	42.54416793	1235.642839	8/11/2019 11:57:44	18.19444444	17.69888889	17.50888889	17.71555556	17.58444444	17.22222222	17.50888889	17.19111111	16.94555556	17.05222222	17.28	17.16444444	17.25	17.07666667	16.95444444	16.98888889	16.77666667	16.96111111	16.64222222	16.82888889	16.61222222	16.66	16.72222222	16.60333333	16.57	16.54111111	16.22777778	16.44222222	16.35666667	16.25777778	16.45888889	15.84111111	16.11666667	16.31	16.94777778	15.74777778	16.77444444	15.92	16.40111111
8/11/2019 11:56:46	-118.515259	42.54419246	1240.052	-118.5152428	42.54418862	1234.25764	-118.5152929	42.5441856	1235.7522	8/11/2019 11:57:45	18.04111111	17.46333333	17.48	17.69111111	17.38111111	17.13555556	17.38555556	17.04888889	16.87555556	16.98888889	17.12666667	17.11555556	17.18666667	17.03444444	16.88888889	16.88777778	16.65444444	16.88222222	16.60444444	16.73666667	16.43111111	16.58555556	16.59	16.49333333	16.48666667	16.46555556	16.15	16.36333333	16.25	16.06222222	16.33888889	15.86888889	16.08777778	16.10555556	16.83888889	15.75111111	16.68	15.85666667	16.18333333
8/11/2019 11:56:47	-118.5152516	42.54419263	1240.101935	-118.5152354	42.54418884	1234.243187	-118.5152868	42.54418572	1235.856323	8/11/2019 11:57:46	18.21555556	17.69555556	17.53333333	17.72222222	17.56111111	17.27777778	17.61555556	17.22666667	17	16.95111111	17.28	17.19222222	17.31111111	17.22222222	17.00888889	17.06111111	16.82333333	16.99777778	16.68444444	16.81333333	16.56222222	16.71222222	16.74	16.51888889	16.59666667	16.57777778	16.22444444	16.53888889	16.33666667	16.24444444	16.57777778	15.83555556	16.27777778	16.38222222	16.98333333	15.88222222	16.64777778	16.04444444	16.30777778
8/11/2019 11:56:48	-118.5152352	42.54418782	1240.154645	-118.5152195	42.54418401	1234.266668	-118.5152736	42.54418082	1235.982258	8/11/2019 11:57:47	18.10444444	17.63444444	17.60888889	17.77111111	17.64777778	17.29	17.69666667	17.18111111	17.00333333	17.04444444	17.36888889	17.19666667	17.31777778	17.18333333	17.03	17.07111111	16.75666667	16.96777778	16.75222222	16.77222222	16.55444444	16.66555556	16.72	16.48555556	16.56222222	16.52	16.29111111	16.46666667	16.37333333	16.23777778	16.61111111	15.92222222	16.17222222	16.45666667	16.98444444	15.83888889	16.75777778	16.12	16.23222222
8/11/2019 11:56:49	-118.5152115	42.54418002	1240.246452	-118.5151958	42.54417603	1234.302706	-118.5152525	42.54417314	1236.121871	8/11/2019 11:57:48	17.73888889	17.23	17.17888889	17.36	17.24	16.85222222	17.10444444	16.71111111	16.46	16.63666667	16.75888889	16.69333333	16.77222222	16.67888889	16.43444444	16.56888889	16.23444444	16.38444444	16.22333333	16.22111111	16.09	16.12777778	16.26777778	16.06666667	16.02333333	16.01	15.65333333	15.91777778	15.79	15.66111111	16.03777778	15.35888889	15.71333333	15.47888889	16.18666667	15.22444444	16.01	15.60111111	15.8
8/11/2019 11:56:50	-118.5151824	42.54417009	1240.290387	-118.5151667	42.54416602	1234.307442	-118.5152176	42.54415923	1236.23229	8/11/2019 11:57:49	18.16444444	17.52111111	17.37555556	17.73333333	17.52111111	17.21555556	17.41777778	17.09	16.79333333	17.05555556	17.18777778	17.16111111	17.20222222	17.19444444	16.98	16.94	16.67888889	16.94555556	16.56777778	16.68	16.45777778	16.58111111	16.67666667	16.51888889	16.50444444	16.59777778	16.22777778	16.31444444	16.17333333	16.16555556	16.49888889	15.90555556	16.13222222	16.36555556	16.92555556	15.93	16.64777778	16.06111111	16.34555556
8/11/2019 11:56:51	-118.5151493	42.54415895	1240.28271	-118.5151335	42.5441547	1234.326013	-118.5151268	42.54414168	1236.465194	8/11/2019 11:57:50	18.01555556	17.46888889	17.57222222	17.70777778	17.42888889	17.22777778	17.64111111	17.03777778	16.88222222	17.01444444	17.22888889	17.21222222	17.29	17.11111111	17.03	17.06333333	16.74555556	16.98222222	16.68888889	16.73888889	16.57333333	16.61888889	16.77555556	16.53111111	16.51111111	16.62	16.27333333	16.50666667	16.26333333	16.31777778	16.53333333	15.90333333	16.22777778	16.19777778	16.80333333	15.79222222	16.72777778	16.13777778	16.51333333
8/11/2019 11:56:52	-118.515114	42.5441473	1240.2138	-118.5150985	42.54414276	1234.31602	-118.5150439	42.5441419	1236.6164	8/11/2019 11:57:51	17.24111111	16.74	16.54	16.87444444	16.79111111	16.5	16.81222222	16.32	16.09666667	16.15111111	16.45666667	16.32888889	16.34666667	16.23555556	16.14666667	16.21888889	15.79666667	16.13444444	15.85333333	16.01111111	15.75444444	15.83666667	15.80888889	15.65333333	15.70333333	15.79444444	15.36444444	15.67222222	15.40333333	15.29111111	15.62888889	15.06333333	15.34777778	15.39111111	15.98888889	15.06888889	15.94777778	15.14	15.52666667
8/11/2019 11:56:53	-118.5150767	42.5441351	1240.086935	-118.5150621	42.54413018	1234.308839	-118.5149901	42.54413141	1236.752452	8/11/2019 11:57:52	16.697	16.394	16.396	16.564	16.476	16.028	16.385	15.937	15.681	15.87	16.065	16.005	15.992	15.879	15.79	15.784	15.511	15.636	15.426	15.407	15.283	15.386	15.49	15.286	15.218	15.292	14.989	15.309	15.043	14.989	15.257	14.676	14.885	15.012	15.872	14.506	15.562	14.892	15.18
8/11/2019 11:56:54	-118.5150379	42.54412202	1239.992452	-118.5150235	42.54411673	1234.320165	-118.5149447	42.54411777	1236.936194	8/11/2019 11:57:53	16.96	16.51333333	16.39888889	16.77666667	16.52555556	16.17555556	16.48	16.18222222	15.92333333	15.97	16.22888889	16.16	16.21	16.12333333	15.97777778	15.99888889	15.75888889	15.95222222	15.59555556	15.77888889	15.57888889	15.60444444	15.72444444	15.48888889	15.56111111	15.51555556	15.25222222	15.36666667	15.30333333	15.20666667	15.50111111	14.89444444	15.18777778	15.35777778	15.92222222	14.78222222	15.49666667	15.07666667	15.34666667
8/11/2019 11:56:55	-118.5149995	42.54410898	1239.892613	-118.5149856	42.54410342	1234.335052	-118.5149104	42.54410681	1237.105839	8/11/2019 11:57:54	17.52222222	17.00222222	17.02555556	17.07555556	17.00888889	16.78333333	17.11	16.61	16.35666667	16.51	16.71333333	16.57888889	16.60666667	16.66888889	16.42333333	16.52888889	16.18444444	16.44	16.20666667	16.26888889	16.11444444	16.18222222	16.23888889	16.01777778	16.07555556	16.04111111	15.74555556	15.95	15.73666667	15.75555556	16.09111111	15.48	15.7	15.55444444	16.25444444	15.32333333	16.11888889	15.44444444	15.65333333
8/11/2019 11:56:56	-118.5149602	42.54409558	1239.7988	-118.5149464	42.54408979	1234.31734	-118.5148885	42.54410182	1237.1736	8/11/2019 11:57:55	17.62777778	16.95555556	16.96888889	17.12	17.10111111	16.8	17.09777778	16.69222222	16.41333333	16.61666667	16.83555556	16.68444444	16.76888889	16.71444444	16.62333333	16.53333333	16.39888889	16.54222222	16.27	16.38333333	16.18444444	16.27666667	16.41888889	16.12111111	16.17	16.18888889	15.91777778	16.01888889	15.94666667	15.87111111	16.04222222	15.56333333	15.76	15.69444444	16.31555556	15.31444444	16.15777778	15.56	15.86111111
8/11/2019 11:56:57	-118.5149199	42.54408166	1239.71471	-118.5149066	42.54407589	1234.304561	-118.5148479	42.54409068	1237.251774	8/11/2019 11:57:56	18.12222222	17.59666667	17.53333333	17.58888889	17.63666667	17.24444444	17.49111111	17.03666667	16.90888889	16.97666667	17.36444444	17.25555556	17.23777778	17.18555556	17.04111111	17.02555556	16.79555556	17.02	16.66222222	16.78222222	16.49444444	16.68888889	16.70888889	16.58777778	16.53666667	16.49777778	16.31555556	16.39444444	16.37333333	16.24555556	16.56666667	16.03888889	16.22222222	16.30888889	16.89777778	15.62555556	16.40666667	16.11333333	16.28666667
8/11/2019 11:56:58	-118.5148791	42.54406752	1239.604355	-118.5148657	42.54406151	1234.312094	-118.5148026	42.54407368	1237.372677	8/11/2019 11:57:57	17.94555556	17.42555556	17.36444444	17.64666667	17.42222222	17.29444444	17.56777778	17.05555556	16.81888889	17.01111111	17.25222222	17.09444444	17.15555556	17.18333333	16.95222222	16.92222222	16.81444444	17.01333333	16.66444444	16.83	16.57666667	16.72777778	16.68666667	16.52111111	16.55444444	16.69444444	16.25333333	16.55444444	16.38666667	16.21111111	16.43888889	15.89111111	16.18555556	16.36555556	16.65777778	15.59444444	16.67888889	16.01	16.42
8/11/2019 11:56:59	-118.5148379	42.54405336	1239.561419	-118.5148266	42.54404787	1234.382913	-118.5147733	42.54406227	1237.497355	8/11/2019 11:57:58	17.51555556	17.08444444	17.17888889	17.31666667	17.24	16.96222222	17.11555556	16.69555556	16.58	16.74	17.01555556	16.81111111	16.82888889	16.80111111	16.65222222	16.72777778	16.45333333	16.63666667	16.36666667	16.42444444	16.24222222	16.37888889	16.47333333	16.31666667	16.34333333	16.24888889	16.02666667	16.26666667	16.09333333	16.02111111	16.35777778	15.71888889	15.98444444	15.87555556	16.63222222	15.24	16.36	15.81	15.88777778
8/11/2019 11:57:00	-118.5147968	42.54403977	1239.617484	-118.5147835	42.54403342	1234.497832	-118.5147421	42.54404721	1237.591677	8/11/2019 11:57:59	17.22888889	17.04222222	16.85777778	17.00222222	16.92222222	16.63	16.80111111	16.41666667	16.24666667	16.37555556	16.62333333	16.53333333	16.52666667	16.50666667	16.31333333	16.33222222	16.07222222	16.36666667	16.1	16.17444444	16.04333333	15.95444444	16.11444444	16.08333333	15.97888889	15.95666667	15.66	15.88888889	15.78666667	15.68666667	15.91333333	15.37	15.52222222	15.69333333	16.44333333	15.27444444	15.96333333	15.41333333	15.59333333
8/11/2019 11:57:01	-118.5147561	42.54402626	1239.654	-118.5147425	42.54401972	1234.52826	-118.5147087	42.5440356	1237.606	8/11/2019 11:58:00	17.11	16.96111111	16.98444444	17.22555556	16.87222222	16.65333333	16.86333333	16.50555556	16.34	16.37777778	16.71444444	16.56444444	16.56777778	16.57888889	16.46111111	16.47888889	16.26222222	16.41888889	16.12666667	16.17444444	16.08555556	16.11333333	16.32666667	16.04444444	16.09888889	16.06	15.86888889	16.02333333	15.92333333	15.71333333	16.11111111	15.49444444	15.69555556	15.83444444	16.48666667	15.33	16.36777778	15.53666667	15.87555556
8/11/2019 11:57:02	-118.5147155	42.5440123	1239.658645	-118.514702	42.54400602	1234.513426	-118.5146748	42.54402602	1237.566516	8/11/2019 11:58:01	19.15111111	18.46333333	18.52555556	18.70444444	18.51777778	18.25333333	18.53	18.11333333	17.97888889	18.11777778	18.33444444	18.28	18.28777778	18.29888889	18.17555556	18.16	17.88888889	18.09666667	17.88	18	17.75333333	17.95555556	17.98222222	17.84	17.76444444	17.82444444	17.57666667	17.77888889	17.73666667	17.52444444	17.86666667	17.44777778	17.57333333	17.65333333	18.18444444	17.06	17.98555556	17.47555556	17.74444444
8/11/2019 11:57:03	-118.514674	42.54399795	1239.611806	-118.5146602	42.54399168	1234.462635	-118.5146388	42.54401328	1237.489935	8/11/2019 11:58:02	17.77555556	17.28777778	17.31888889	17.50777778	17.21222222	17.01444444	17.22333333	16.95666667	16.69777778	16.78333333	17.13666667	16.98222222	17.01888889	16.95222222	16.85888889	16.89666667	16.52666667	16.73888889	16.51888889	16.61	16.39444444	16.55333333	16.68666667	16.44555556	16.44111111	16.50555556	16.21888889	16.32	16.29666667	16.16444444	16.36111111	15.78444444	16.09777778	16.14111111	16.87222222	15.80666667	16.73444444	15.93888889	16.30555556
8/11/2019 11:57:04	-118.5146337	42.54398355	1239.561032	-118.5146201	42.54397723	1234.383265	-118.5146029	42.54399878	1237.385548	8/11/2019 11:58:03	17.365	16.942	16.987	17.116	17.05	16.77	17.099	16.63	16.473	16.581	16.887	16.708	16.687	16.698	16.463	16.573	16.341	16.522	16.319	16.33	16.19	16.317	16.394	16.205	16.162	16.21	15.869	16.177	16.081	15.88	16.153	15.582	15.745	16.063	16.581	15.531	16.367	15.8	16.162
8/11/2019 11:57:05	-118.5145942	42.54396968	1239.515484	-118.5145806	42.54396311	1234.320165	-118.5145643	42.54398198	1237.281097	8/11/2019 11:58:04	17.32333333	16.85222222	16.93555556	16.94222222	17.15222222	16.68666667	17.00444444	16.5	16.34	16.52	16.70333333	16.57777778	16.65222222	16.51555556	16.39444444	16.45	16.15222222	16.42333333	16.12666667	16.23222222	16.04444444	16.20333333	16.28444444	16.04666667	16.14333333	16.09333333	15.81444444	16.05777778	15.92	15.93888889	16.16666667	15.6	15.85444444	15.99444444	16.58333333	15.56111111	16.32111111	15.51222222	15.95555556
8/11/2019 11:57:06	-118.5145538	42.5439556	1239.466	-118.5145401	42.54394884	1234.26962	-118.5145246	42.54396852	1237.2326	8/11/2019 11:58:05	17.14666667	16.62555556	16.68333333	16.87333333	16.74	16.44	16.80111111	16.33	16.21777778	16.15888889	16.57555556	16.36333333	16.56222222	16.42444444	16.22555556	16.27111111	15.96555556	16.21666667	16.00888889	16.02555556	15.83222222	15.94555556	16.00444444	15.95555556	15.94	15.85777778	15.63	15.78666667	15.76666667	15.70333333	15.89111111	15.26444444	15.67222222	15.67444444	16.23	15.37222222	16.09555556	15.44888889	15.75555556
8/11/2019 11:57:07	-118.5145117	42.54394127	1239.418452	-118.5144982	42.54393461	1234.242439	-118.5144813	42.54395099	1237.201871	8/11/2019 11:58:06	16.75333333	16.30444444	16.04555556	16.34555556	16.26111111	16.05444444	16.33111111	15.83111111	15.65666667	15.75222222	16.04444444	15.89777778	15.86222222	15.84666667	15.70222222	15.70444444	15.56555556	15.74222222	15.39333333	15.58666667	15.32777778	15.45	15.61777778	15.42	15.46777778	15.44111111	15.15444444	15.27444444	15.25	15.13888889	15.49333333	14.86222222	15.01555556	15.26	15.80111111	14.69888889	15.56666667	14.93444444	15.27333333
8/11/2019 11:57:08	-118.5144681	42.54392652	1239.40271	-118.5144599	42.54392175	1234.250852	-118.5144541	42.54392634	1237.257871	8/11/2019 11:58:07	16.56666667	16.30666667	16.01111111	16.28777778	16.14111111	15.81	16.10555556	15.65444444	15.49111111	15.58	15.87222222	15.68888889	15.83333333	15.64111111	15.57	15.65333333	15.38666667	15.54444444	15.29333333	15.28666667	15.25888889	15.34777778	15.40666667	15.27222222	15.3	15.31111111	14.93	15.20666667	14.98	15.04555556	15.32	14.68111111	14.97888889	15.12	15.65444444	14.51777778	15.73	14.89666667	15.11333333
8/11/2019 11:57:09	-118.5144254	42.54391204	1239.44129	-118.5144121	42.54390556	1234.297577	-118.5144176	42.5438798	1237.491452	8/11/2019 11:58:08	15.82555556	15.68	15.44	15.54222222	15.35888889	15.11444444	15.45666667	15.02888889	14.85	14.98	15.19666667	15.10555556	15.22111111	15.14666667	14.99444444	14.98666667	14.65	14.99222222	14.74444444	14.75444444	14.59	14.67777778	14.71333333	14.54888889	14.56222222	14.65333333	14.43666667	14.61444444	14.5	14.49333333	14.76777778	14.19333333	14.52666667	14.56111111	15.17222222	14.11666667	14.92111111	14.48222222	14.64666667
8/11/2019 11:57:10	-118.5143853	42.5438985	1239.465	-118.5143717	42.54389177	1234.32518	-118.514377	42.5438669	1237.6808	8/11/2019 11:58:09	15.34333333	14.91666667	14.84222222	15.01444444	14.86666667	14.60555556	14.92777778	14.40888889	14.35777778	14.40888889	14.61222222	14.59	14.59444444	14.52	14.42333333	14.36444444	14.18111111	14.41444444	14.18777778	14.20111111	14.05333333	14.24	14.28111111	14.17666667	14.12555556	14.17	13.89333333	14.06666667	13.96222222	14.00555556	14.24555556	13.69888889	13.91555556	14.06555556	14.52111111	13.62555556	14.55333333	13.91444444	14.1
8/11/2019 11:57:11	-118.5143481	42.54388578	1239.516645	-118.5143347	42.54387904	1234.333939	-118.5143396	42.54388615	1237.60971	8/11/2019 11:58:10	14.83222222	14.35777778	14.35888889	14.62222222	14.53555556	14.12333333	14.41111111	13.93444444	13.75666667	13.83666667	14.19555556	14.07666667	14.10666667	14.10666667	13.9	13.87555556	13.66222222	13.88444444	13.61333333	13.70666667	13.57888889	13.65777778	13.76111111	13.55333333	13.68888889	13.69555556	13.44222222	13.63	13.46888889	13.48111111	13.72222222	13.14666667	13.49333333	13.51666667	14.29111111	13.23222222	13.87222222	13.52333333	13.83555556
8/11/2019 11:57:12	-118.5143126	42.54387393	1239.567419	-118.5142991	42.54386687	1234.350619	-118.5143051	42.54389385	1237.428065	8/11/2019 11:58:11	15.58222222	15.10777778	15.07	15.36555556	15.13444444	14.92333333	15.06444444	14.76	14.44222222	14.61666667	14.84222222	14.77555556	14.79111111	14.65888889	14.60444444	14.65333333	14.43555556	14.63555556	14.39222222	14.41888889	14.26333333	14.36777778	14.44444444	14.22888889	14.42333333	14.38333333	14.04888889	14.30666667	14.09777778	14.18444444	14.41444444	13.73222222	13.98333333	14.23111111	14.81666667	13.88	14.81222222	14.15333333	14.11666667
8/11/2019 11:57:13	-118.5142781	42.54386251	1239.58371	-118.514265	42.54385523	1234.355494	-118.5142661	42.54388927	1237.276129	8/11/2019 11:58:12	16.27333333	15.83777778	15.89333333	16.03111111	15.94333333	15.70888889	15.86	15.54222222	15.35777778	15.50888889	15.72555556	15.58333333	15.73333333	15.59555556	15.34111111	15.43111111	15.18555556	15.38333333	15.22666667	15.17333333	15.05444444	15.16111111	15.15555556	15.05666667	15.10555556	15.11444444	14.86444444	14.96888889	14.93	14.85	15.20333333	14.45555556	14.79333333	14.84777778	15.34555556	14.45555556	15.22444444	14.79555556	14.79888889
8/11/2019 11:57:14	-118.5142446	42.5438512	1239.565355	-118.5142315	42.54384364	1234.354274	-118.514226	42.54387742	1237.160806	8/11/2019 11:58:13	16.511	16.009	16.024	16.229	16.127	15.786	16.041	15.674	15.427	15.527	15.82	15.618	15.763	15.592	15.467	15.656	15.352	15.624	15.202	15.297	15.179	15.268	15.285	15.203	15.225	15.177	14.907	15.132	14.953	14.976	15.145	14.645	14.886	15.134	15.572	14.537	15.485	14.792	14.982
8/11/2019 11:57:15	-118.514212	42.5438403	1239.5806	-118.5141986	42.54383239	1234.36252	-118.514188	42.5438633	1237.0904	8/11/2019 11:58:14	17.07333333	16.78222222	16.64333333	16.88555556	16.71444444	16.35333333	16.52777778	16.11222222	16.05888889	16.21777778	16.42444444	16.23333333	16.32888889	16.25333333	16.07777778	16.11333333	15.84888889	16.04222222	15.83	15.94666667	15.71333333	15.82888889	15.85444444	15.76555556	15.76111111	15.70888889	15.52666667	15.69888889	15.55333333	15.45666667	15.69555556	15.12111111	15.40888889	15.37888889	16.17777778	15.06	15.77666667	15.33777778	15.64666667
8/11/2019 11:57:16	-118.5141789	42.54382967	1239.590516	-118.5141657	42.54382167	1234.365603	-118.5141531	42.54384837	1237.008258	8/11/2019 11:58:15	17.70333333	17.39888889	17.22	17.52444444	17.33666667	16.94777778	17.20555556	16.81777778	16.80777778	16.78666667	17.20888889	16.97444444	17.07	17.01666667	16.83666667	16.90222222	16.61777778	16.84444444	16.58888889	16.64333333	16.54888889	16.58888889	16.72111111	16.49888889	16.60888889	16.56444444	16.30555556	16.49111111	16.38333333	16.34555556	16.64555556	15.93333333	16.22333333	16.32444444	16.80333333	15.74	16.66333333	16.13111111	16.17777778
8/11/2019 11:57:17	-118.5141453	42.54381891	1239.601484	-118.5141317	42.54381064	1234.366616	-118.5141163	42.54383237	1236.916742	8/11/2019 11:58:16	16.71666667	16.24333333	16.21333333	16.54222222	16.52555556	16.14333333	16.39888889	16.04	15.75444444	15.99888889	16.13111111	16.01444444	16.07444444	16.10222222	15.91111111	15.94777778	15.77555556	15.85222222	15.65	15.69666667	15.55	15.56444444	15.8	15.59777778	15.54888889	15.60777778	15.35444444	15.52777778	15.47	15.37777778	15.6	15.06333333	15.28444444	15.51888889	15.94666667	14.89666667	15.95555556	15.24555556	15.29333333
8/11/2019 11:57:18	-118.5141108	42.54380702	1239.607258	-118.5140969	42.5437984	1234.353823	-118.5140778	42.54381499	1236.841645	8/11/2019 11:58:17	17.34555556	17.06666667	17.00444444	17.00666667	17.12666667	16.69666667	16.94111111	16.60222222	16.32777778	16.48444444	16.80888889	16.59111111	16.60111111	16.59222222	16.51333333	16.46555556	16.23	16.44111111	16.29111111	16.24	16.19	16.24333333	16.30222222	16.17111111	16.25333333	16.08333333	15.92666667	16.14444444	16.07	16.00666667	16.36777778	15.72555556	15.87222222	16.03777778	16.53	15.46222222	16.51666667	15.74888889	16.07666667
8/11/2019 11:57:19	-118.5140756	42.5437946	1239.631032	-118.5140617	42.54378566	1234.373223	-118.5140394	42.5437991	1236.815097	8/11/2019 11:58:18	17.82666667	17.41333333	17.48111111	17.34777778	17.49555556	17.24	17.49333333	17.13	16.85777778	16.95666667	17.29222222	17.09	17.21666667	17.10333333	17.07888889	17.12333333	16.77111111	16.96	16.78888889	16.76	16.68555556	16.73333333	16.79555556	16.69555556	16.70666667	16.67222222	16.50222222	16.71222222	16.58	16.51222222	16.86555556	16.29222222	16.25111111	16.42222222	16.94111111	15.94666667	16.88333333	16.28444444	16.61555556
8/11/2019 11:57:20	-118.5140384	42.54378196	1239.6468	-118.5140247	42.54377284	1234.41082	-118.5140002	42.54378294	1236.8252	8/11/2019 11:58:19	18.83222222	18.31111111	18.4	18.64444444	18.53888889	18.15444444	18.33222222	17.99888889	17.78555556	17.92	18.19666667	18.15777778	18.11777778	17.99555556	17.94444444	17.95666667	17.67888889	17.90666667	17.75777778	17.68777778	17.56555556	17.65555556	17.71	17.55666667	17.63666667	17.66666667	17.33555556	17.58222222	17.37333333	17.41555556	17.64222222	17.09333333	17.37333333	17.41	17.91777778	17.00333333	17.99444444	17.18888889	17.59
8/11/2019 11:57:21	-118.5140007	42.54376872	1239.667742	-118.5139873	42.54375962	1234.433103	-118.5139811	42.54375203	1236.919323	8/11/2019 11:58:20	18.66444444	18.33888889	18.30666667	18.46222222	18.32111111	18.20888889	18.34666667	17.96777778	17.85888889	17.96	18.24777778	18.09	18.14222222	18.07333333	17.93222222	18.02777778	17.90444444	17.96222222	17.82555556	17.81111111	17.66333333	17.76444444	17.92777778	17.68555556	17.76	17.70111111	17.46666667	17.71888889	17.46666667	17.59111111	17.74444444	17.33888889	17.42888889	17.62666667	17.77444444	17.09444444	17.69111111	17.42333333	17.48333333
8/11/2019 11:57:22	-118.5139624	42.54375523	1239.67429	-118.5139485	42.54374606	1234.377194	-118.5139663	42.54372653	1236.924516	8/11/2019 11:58:21	17.18555556	16.87888889	16.78333333	17.10222222	16.94555556	16.67111111	16.99	16.56555556	16.48555556	16.52555556	16.78888889	16.75111111	16.82222222	16.76888889	16.53555556	16.61888889	16.40888889	16.6	16.38111111	16.40111111	16.25888889	16.33111111	16.38555556	16.28444444	16.41333333	16.32	16.08333333	16.27777778	16.22666667	16.19222222	16.49666667	15.87555556	16.17111111	16.18444444	16.66666667	15.73111111	16.51666667	15.89666667	16.13666667
8/11/2019 11:57:23	-118.5139242	42.5437421	1239.624935	-118.5139105	42.5437329	1234.286755	-118.5139298	42.54371443	1236.88329	8/11/2019 11:58:22	17.92222222	17.67888889	17.89222222	17.86111111	17.76444444	17.45777778	17.78444444	17.39777778	17.35333333	17.31111111	17.64666667	17.49888889	17.59333333	17.56111111	17.47666667	17.49	17.24222222	17.42444444	17.23111111	17.26666667	17.04333333	17.22555556	17.23888889	17.1	17.24111111	17.22666667	16.88	17.18333333	17.05666667	17.02777778	17.23	16.78888889	16.85666667	16.76333333	17.57555556	16.50333333	17.42444444	16.75555556	17.04333333
8/11/2019 11:57:24	-118.513886	42.54372928	1239.664516	-118.5138723	42.54371987	1234.2815	-118.5138943	42.54370406	1236.869548	8/11/2019 11:58:23	18.92	18.507	18.358	18.671	18.615	18.237	18.453	17.975	17.926	18.095	18.28	18.269	18.321	18.28	18.071	18.085	17.798	18.081	17.764	17.907	17.688	17.857	17.832	17.791	17.794	17.789	17.575	17.709	17.542	17.599	17.839	17.17	17.443	17.316	17.924	17.036	17.63	17.218	17.716
8/11/2019 11:57:25	-118.5138489	42.5437167	1239.757	-118.513835	42.54370727	1234.29026	-118.5138644	42.54369354	1236.8492	8/11/2019 11:58:24	18.24666667	18.11333333	17.85333333	18.15333333	18.02777778	17.81111111	17.97555556	17.62444444	17.50222222	17.61222222	17.88777778	17.73666667	17.84333333	17.78111111	17.63666667	17.71888889	17.49	17.70333333	17.44	17.41	17.24	17.45555556	17.5	17.36555556	17.39888889	17.42222222	17.05888889	17.30111111	17.16	17.17333333	17.53222222	16.81777778	16.95555556	17.10777778	17.78	16.56888889	17.27777778	17.02555556	16.98222222
8/11/2019 11:57:26	-118.5138117	42.54370388	1239.797645	-118.5137977	42.54369443	1234.259968	-118.5138341	42.54368221	1236.793065	8/11/2019 11:58:25	18.28444444	17.87888889	17.89333333	18.01333333	17.97	17.77333333	17.98111111	17.56666667	17.57555556	17.53555556	17.88888889	17.66111111	17.85555556	17.76888889	17.64	17.68777778	17.49888889	17.61333333	17.41444444	17.41444444	17.29222222	17.43333333	17.53888889	17.32555556	17.30888889	17.27444444	17.09555556	17.38777778	17.22333333	17.1	17.43444444	16.83	16.98444444	16.98777778	17.55888889	16.79	17.16555556	16.85	16.88888889
8/11/2019 11:57:27	-118.513774	42.54369094	1239.808516	-118.5137599	42.54368129	1234.243529	-118.5137915	42.54366733	1236.775871	8/11/2019 11:58:26	17.94	17.62666667	17.56555556	17.65888889	17.68444444	17.39111111	17.58777778	17.14444444	17.04888889	17.08666667	17.42666667	17.29777778	17.37888889	17.42666667	17.16444444	17.27111111	16.97333333	17.13666667	16.93	16.99666667	16.84888889	16.89111111	16.99444444	16.83666667	16.91777778	16.89222222	16.62666667	16.69333333	16.62666667	16.65	16.93333333	16.24222222	16.54222222	16.37222222	17.04444444	15.80555556	17.13333333	16.27666667	16.51444444
8/11/2019 11:57:28	-118.5137362	42.5436781	1239.852484	-118.5137219	42.5436683	1234.259029	-118.5137423	42.54364709	1236.812129	8/11/2019 11:58:27	17.80333333	17.43222222	17.59	17.64777778	17.55333333	17.41222222	17.52333333	17.02666667	17.03111111	17.17111111	17.43111111	17.21444444	17.32888889	17.31555556	17.14888889	17.17777778	16.94777778	17.15444444	16.86666667	16.93222222	16.84888889	16.89	16.96333333	16.79444444	16.81333333	16.88444444	16.55777778	16.74777778	16.72666667	16.69777778	16.85444444	16.32555556	16.40111111	16.47	17.17111111	15.97777778	16.74333333	16.18555556	16.56222222
8/11/2019 11:57:29	-118.5137008	42.54366608	1239.8834	-118.5136869	42.5436564	1234.26984	-118.5137147	42.54363298	1236.809533	8/11/2019 11:58:28	17.46	17.15444444	17.09	17.27444444	17.22	16.92555556	17.23	16.78111111	16.65555556	16.89111111	17.07	17.04111111	17.08	17.01111111	16.93111111	16.89444444	16.61888889	16.81666667	16.60111111	16.64	16.60888889	16.58888889	16.66	16.46111111	16.56666667	16.57555556	16.26666667	16.43333333	16.42333333	16.42666667	16.63444444	15.96444444	16.17444444	16.33111111	16.56444444	15.49555556	16.53888889	15.93333333	16.17222222
8/11/2019 11:57:30	-118.5136752	42.54365749	1239.850161	-118.5136621	42.54364821	1234.254719	-118.5136969	42.54362146	1236.803065	8/11/2019 11:58:29	17.92111111	17.57777778	17.50444444	17.71777778	17.53777778	17.21333333	17.52777778	17.09	16.80333333	17.11	17.31111111	17.15777778	17.26222222	17.17888889	17.05333333	17.09555556	16.86111111	17.05888889	16.79444444	16.83222222	16.67888889	16.87111111	16.83777778	16.73777778	16.74555556	16.70333333	16.46333333	16.63666667	16.46666667	16.50444444	16.75333333	16.12666667	16.27444444	16.53222222	16.81222222	15.95333333	16.83555556	16.13111111	16.32
8/11/2019 11:57:31	-118.5136691	42.54365548	1239.898774	-118.5136554	42.54364623	1234.33031	-118.5136951	42.54361869	1236.849258	8/11/2019 11:58:30	17.78444444	17.37555556	17.60777778	17.66888889	17.52111111	17.17333333	17.43888889	16.94777778	16.93555556	17.13	17.34	17.10666667	17.30111111	17.15	16.94333333	17.08444444	16.83111111	16.96888889	16.80333333	16.83222222	16.64555556	16.78	16.83888889	16.72111111	16.70333333	16.69444444	16.45555556	16.64333333	16.52333333	16.48777778	16.80333333	16.16777778	16.22666667	16.46444444	17	15.69	16.44555556	16.10888889	16.44777778
8/11/2019 11:57:32	-118.5136727	42.54364857	1239.961387	-118.5136588	42.54363977	1234.376387	-118.5136784	42.54362198	1236.785871	8/11/2019 11:58:31	17.88888889	17.23666667	17.37111111	17.59444444	17.45888889	17.10666667	17.39666667	16.99222222	16.82777778	17.03222222	17.34666667	17.15333333	17.23888889	17.21888889	16.97777778	17.04666667	16.85777778	16.96777778	16.77777778	16.84	16.63	16.74333333	16.83444444	16.65555556	16.70666667	16.75333333	16.44	16.63111111	16.53333333	16.43555556	16.63444444	16.16	16.18	16.37333333	16.84666667	15.78	16.65555556	16.34444444	16.27777778
8/11/2019 11:57:33	-118.5136815	42.54363548	1239.998419	-118.5136676	42.5436273	1234.433258	-118.5136748	42.54361978	1236.665581	8/11/2019 11:58:32	17.70777778	17.32555556	17.36444444	17.61111111	17.43555556	17.12666667	17.29222222	17.00222222	16.90333333	16.94666667	17.29777778	17.12888889	17.20555556	17.12222222	16.99444444	17.09111111	16.88111111	17.02666667	16.76	16.79555556	16.71555556	16.76888889	16.86888889	16.69888889	16.67333333	16.86	16.43555556	16.63222222	16.40333333	16.59	16.65444444	16.22666667	16.37222222	16.40111111	16.72666667	16.05888889	16.72666667	15.92555556	16.41555556
8/11/2019 11:57:34	-118.5136931	42.54361942	1240.085	-118.513679	42.54361166	1234.49252	-118.5136899	42.54360518	1236.5888	8/11/2019 11:58:33	17.15333333	16.71333333	16.80111111	16.99666667	16.85555556	16.64777778	16.92777778	16.42888889	16.43	16.44555556	16.80777778	16.63666667	16.66555556	16.62333333	16.46	16.62666667	16.34111111	16.50444444	16.29666667	16.26111111	16.13777778	16.20444444	16.36777778	16.18	16.14555556	16.26	16.00444444	16.15111111	16.07	15.98444444	16.17888889	15.62444444	15.78888889	15.76888889	16.48666667	15.27111111	15.86222222	15.57666667	16.07555556
8/11/2019 11:57:35	-118.5137062	42.54360065	1240.130548	-118.5136921	42.543593	1234.504535	-118.5136995	42.54358611	1236.522065	8/11/2019 11:58:34	17.07111111	16.59555556	16.74888889	16.92111111	16.73	16.56666667	16.80777778	16.36	16.32777778	16.40777778	16.74888889	16.53777778	16.61777778	16.61111111	16.46555556	16.50333333	16.32	16.50222222	16.25777778	16.29222222	16.04444444	16.25555556	16.26777778	16.13666667	16.30666667	16.15111111	15.88333333	16.04777778	15.99666667	15.89888889	16.19222222	15.75333333	15.92	15.72888889	16.41777778	15.20777778	16.28222222	15.65777778	15.94111111
8/11/2019 11:57:36	-118.5137215	42.54357944	1240.174903	-118.5137067	42.54357263	1234.490368	-118.5137079	42.5435648	1236.446839	8/11/2019 11:58:35	17.957	17.657	17.824	18.018	17.852	17.514	17.783	17.463	17.422	17.495	17.747	17.686	17.69	17.664	17.561	17.638	17.323	17.618	17.38	17.441	17.275	17.421	17.492	17.249	17.407	17.356	17.002	17.252	17.194	17.173	17.271	16.92	16.97	16.862	17.214	16.32	17.127	16.707	16.874
8/11/2019 11:57:37	-118.5137378	42.54355778	1240.193613	-118.5137238	42.54355006	1234.462013	-118.5137103	42.54353338	1236.337194	8/11/2019 11:58:36	18.26333333	17.77222222	17.73666667	17.99555556	17.95555556	17.66777778	17.88888889	17.49555556	17.40444444	17.60444444	17.85333333	17.73	17.86777778	17.78555556	17.69555556	17.71666667	17.56111111	17.67777778	17.49888889	17.39777778	17.37111111	17.43555556	17.62111111	17.44333333	17.46111111	17.40777778	17.25555556	17.34333333	17.28	17.26444444	17.49222222	16.94111111	17.13888889	16.96888889	17.38555556	16.45444444	17.27555556	16.8	17.14333333
8/11/2019 11:57:38	-118.513754	42.54353648	1240.1868	-118.5137397	42.54352892	1234.441277	-118.5137189	42.54350548	1236.214633	8/11/2019 11:58:37	18.25111111	17.71444444	17.68444444	18.01	17.97333333	17.61555556	17.83777778	17.54222222	17.46333333	17.51444444	17.89333333	17.74333333	17.91111111	17.84	17.57777778	17.67333333	17.56222222	17.66333333	17.46333333	17.46444444	17.36444444	17.47666667	17.65444444	17.45777778	17.49444444	17.46666667	17.20666667	17.38666667	17.31666667	17.32666667	17.59666667	16.92333333	16.97888889	17.12888889	17.48	16.60888889	17.24666667	16.96888889	17.35666667
8/11/2019 11:57:39	-118.5137697	42.54351496	1240.158645	-118.5137555	42.54350726	1234.404335	-118.5137461	42.54348931	1236.091581	8/11/2019 11:58:38	18.99333333	18.63	18.42888889	18.79888889	18.71	18.53666667	18.62666667	18.41222222	18.2	18.37444444	18.72111111	18.61777778	18.6	18.55222222	18.50444444	18.56555556	18.35111111	18.49777778	18.35666667	18.32777778	18.22222222	18.29111111	18.43333333	18.24111111	18.31888889	18.39	18.00777778	18.15777778	18.10333333	18.09111111	18.39	17.77555556	17.88555556	17.65333333	17.96	17.18333333	17.97888889	17.72666667	17.76555556
8/11/2019 11:57:40	-118.5137865	42.5434932	1240.128452	-118.5137721	42.54348569	1234.370416	-118.5137837	42.54347527	1235.984452	8/11/2019 11:58:39	19.23888889	19.00111111	18.97888889	19.18888889	19.19555556	18.89111111	19.11111111	18.70222222	18.69	18.72111111	19.12888889	18.94333333	18.98	19.03111111	18.87555556	18.94333333	18.79333333	18.90777778	18.75666667	18.81333333	18.64444444	18.70888889	18.88222222	18.63888889	18.75222222	18.80333333	18.43888889	18.61111111	18.61666667	18.59	18.82	18.26111111	18.37555556	18.27444444	18.53666667	17.66666667	18.50111111	18.10444444	18.47777778
8/11/2019 11:57:41	-118.5138041	42.5434746	1240.049645	-118.5137896	42.54346741	1234.339365	-118.5138008	42.54346123	1235.903806	8/11/2019 11:58:40	18.62111111	18.20666667	18.31222222	18.42111111	18.45	18.18888889	18.36	18.06111111	17.91111111	17.95	18.32888889	18.22222222	18.27333333	18.21666667	18.12111111	18.16333333	17.98222222	18.08888889	18.00555556	17.97444444	17.84222222	17.93333333	18.03333333	17.90444444	17.93333333	18.02333333	17.68666667	17.92777778	17.67333333	17.68888889	18.04333333	17.35777778	17.52222222	17.30444444	17.77111111	16.84777778	17.69222222	17.34777778	17.73
8/11/2019 11:57:42	-118.5138251	42.54346302	1239.91	-118.5138107	42.54345599	1234.30165	-118.5138043	42.5434504	1235.9013	8/11/2019 11:58:41	18.72111111	18.40888889	18.46777778	18.69888889	18.52888889	18.31555556	18.59333333	18.28888889	18.11777778	18.30111111	18.69777778	18.53111111	18.52666667	18.52555556	18.40111111	18.51111111	18.18222222	18.37888889	18.21555556	18.19333333	18.14333333	18.22777778	18.24888889	18.14666667	18.19222222	18.02888889	17.91666667	18.08666667	18.03	17.98	18.24222222	17.69111111	17.85777778	17.85444444	17.85888889	16.78222222	17.79888889	17.37	17.76555556
8/11/2019 11:57:43	-118.5138532	42.54345729	1239.85471	-118.513839	42.54345045	1234.282319	-118.5138433	42.54344459	1235.813645	8/11/2019 11:58:42	21.61111111	21.19333333	21.36777778	21.63555556	21.49222222	21.26222222	21.51222222	21.21111111	21.12666667	21.28333333	21.56333333	21.46888889	21.52666667	21.43333333	21.31333333	21.36	21.15666667	21.35333333	21.13777778	21.11	20.98	21.21666667	21.18444444	21.14777778	21.19666667	20.97222222	20.83666667	20.97666667	20.94666667	20.94888889	21.2	20.65222222	20.76333333	20.40333333	20.74666667	19.92777778	20.54666667	20.27333333	20.80111111
8/11/2019 11:57:44	-118.513885	42.54345544	1239.845581	-118.5138707	42.54344911	1234.301965	-118.5138966	42.54343799	1235.663323	8/11/2019 11:58:43	20.99333333	20.82333333	20.80888889	21.06666667	20.81777778	20.61777778	20.93222222	20.65111111	20.54777778	20.7	20.96333333	20.82888889	20.93444444	20.93777778	20.68111111	20.80555556	20.63555556	20.76666667	20.54666667	20.58555556	20.38	20.50333333	20.65333333	20.47222222	20.65777778	20.60222222	20.28222222	20.32888889	20.34666667	20.34888889	20.56888889	20.01777778	20.14333333	19.99777778	20.49777778	19.46777778	20.21666667	19.98111111	20.08666667
8/11/2019 11:57:45	-118.5139131	42.54345605	1239.823645	-118.5138988	42.54345008	1234.327181	-118.5139441	42.54342312	1235.654194	8/11/2019 11:58:44	21.04222222	20.32555556	20.52555556	20.72	20.51444444	20.42222222	20.67111111	20.32555556	20.3	20.44	20.76444444	20.51111111	20.6	20.56	20.45333333	20.50555556	20.33	20.44666667	20.26333333	20.32333333	20.26111111	20.23666667	20.35111111	20.23222222	20.26888889	20.24777778	20.05111111	20.14888889	20.04	19.97555556	20.36777778	19.67444444	19.79333333	19.94	19.97666667	19.02111111	19.97444444	19.57888889	19.86
8/11/2019 11:57:46	-118.5139367	42.54345809	1239.83829	-118.513922	42.54345232	1234.352455	-118.5139508	42.5434194	1235.809839	8/11/2019 11:58:45	20.84222222	20.44555556	20.61888889	20.8	20.66777778	20.43111111	20.72777778	20.31444444	20.17444444	20.45555556	20.68111111	20.53666667	20.71888889	20.57666667	20.42111111	20.50888889	20.37333333	20.48333333	20.38	20.32888889	20.18444444	20.26	20.35777778	20.29111111	20.38111111	20.27666667	20.11666667	20.20666667	20.11333333	19.99	20.33777778	19.89666667	20.05444444	19.94	19.94888889	19.02777778	20.17111111	19.62444444	19.98666667
8/11/2019 11:57:47	-118.513956	42.5434609	1239.783	-118.5139413	42.54345494	1234.33816	-118.5139321	42.5434308	1235.9702	8/11/2019 11:58:46	23.10333333	22.77666667	22.70888889	22.88111111	22.91	22.68444444	22.97555556	22.58777778	22.48444444	22.73777778	22.94333333	22.76333333	22.81888889	22.91555556	22.65777778	22.68888889	22.56555556	22.61444444	22.52777778	22.5	22.33	22.45555556	22.60333333	22.47	22.60333333	22.37444444	22.21777778	22.31666667	22.13111111	22.28777778	22.49666667	21.92555556	22.18	22.09666667	22.03222222	21.14222222	21.87111111	21.56666667	21.90888889
8/11/2019 11:57:48	-118.5139767	42.54346546	1239.683097	-118.5139619	42.54345941	1234.292694	-118.5139411	42.54343979	1235.98629	8/11/2019 11:58:47	25.13	24.84333333	24.65111111	25.03666667	25.05666667	24.68666667	24.89111111	24.62777778	24.44888889	24.68222222	24.94666667	24.82555556	24.91222222	24.82333333	24.61777778	24.66444444	24.53777778	24.67444444	24.47222222	24.43333333	24.33444444	24.38111111	24.47888889	24.35333333	24.42222222	24.31666667	24.16777778	24.29333333	24.02333333	24.16444444	24.39555556	23.77444444	24.11333333	23.94444444	23.94555556	23.1	23.55	23.75666667	23.79555556
8/11/2019 11:57:49	-118.513999	42.54347173	1239.620742	-118.5139843	42.54346593	1234.276545	-118.5139901	42.5434445	1235.902806	8/11/2019 11:58:48	25.438	25.194	25.197	25.35	25.259	25.111	25.348	24.94	24.916	25.061	25.325	25.199	25.142	25.094	25.086	25.021	24.869	25.012	24.834	24.876	24.733	24.844	24.902	24.769	24.768	24.756	24.518	24.567	24.543	24.528	24.769	24.158	24.327	23.975	24.399	23.445	24.173	24.077	24.116
8/11/2019 11:57:50	-118.5140235	42.54347983	1239.631871	-118.5140088	42.54347418	1234.309987	-118.5140345	42.54344977	1235.793871	8/11/2019 11:58:49	25.32444444	24.80666667	25.09333333	25.27222222	25.13666667	25.02	25.23	24.83222222	24.81222222	24.91333333	25.20222222	25.09333333	25	25.10666667	24.87666667	25.06888889	24.78666667	24.98444444	24.68666667	24.76888889	24.66222222	24.7	24.78222222	24.62111111	24.68	24.59111111	24.40888889	24.46222222	24.51	24.51666667	24.67111111	24.22777778	24.26444444	24.01222222	24.21111111	23.48666667	24.07444444	23.82111111	24.13
8/11/2019 11:57:51	-118.5140499	42.54348822	1239.6456	-118.514035	42.54348268	1234.31518	-118.5140682	42.5434549	1235.6992	8/11/2019 11:58:50	27.97666667	27.88888889	27.78777778	28.04	27.87	27.76888889	28.09444444	27.57777778	27.59777778	27.82222222	28.04444444	28.01888889	27.98444444	27.96333333	27.82111111	27.78777778	27.65666667	27.84222222	27.59111111	27.72444444	27.43	27.46888889	27.59555556	27.45555556	27.49222222	27.43666667	27.22111111	27.21111111	27.21666667	27.14111111	27.41444444	26.95777778	26.97888889	27.12777778	26.96333333	26.04	26.67888889	26.42555556	27.00888889
8/11/2019 11:57:52	-118.5140787	42.54349728	1239.584645	-118.5140637	42.54349172	1234.274268	-118.5140986	42.54346079	1235.592032	8/11/2019 11:58:51	28.41444444	28.03222222	28.18888889	28.38666667	28.36444444	28.20777778	28.34888889	27.98222222	27.95111111	28.14111111	28.37	28.17666667	28.27333333	28.21333333	28.14666667	28.08111111	27.94444444	28.13333333	27.77555556	27.97444444	27.62222222	27.88222222	27.83222222	27.59	27.77111111	27.65333333	27.39666667	27.47777778	27.41	27.41	27.63111111	27.01333333	27.12444444	26.89	27.33111111	26.45888889	26.93555556	26.72888889	27.00888889
8/11/2019 11:57:53	-118.5141097	42.5435072	1239.564194	-118.5140947	42.54350171	1234.2621	-118.5141247	42.54347432	1235.467742	8/11/2019 11:58:52	26.99	26.73555556	26.64333333	26.88555556	26.79222222	26.71	26.81444444	26.42777778	26.39777778	26.40222222	26.84	26.63555556	26.73444444	26.64	26.57111111	26.51444444	26.42111111	26.56	26.29444444	26.38111111	26.13111111	26.21888889	26.28777778	26.16	26.28888889	26.18555556	25.90555556	25.99666667	25.97	25.87444444	26.24	25.63222222	25.69888889	25.41333333	25.67777778	24.73777778	25.57111111	25.49666667	25.61111111
8/11/2019 11:57:54	-118.5141419	42.54351692	1239.532548	-118.5141266	42.5435112	1234.271006	-118.5141374	42.54350828	1235.228129	8/11/2019 11:58:53	24.91888889	24.55444444	24.65	24.95222222	24.81777778	24.58888889	24.83222222	24.40555556	24.37	24.47111111	24.77222222	24.58888889	24.75888889	24.61777778	24.40555556	24.54444444	24.30444444	24.52	24.26444444	24.26888889	24.2	24.22333333	24.36	24.23888889	24.38	24.24888889	24.07555556	24.10111111	24.05	24.05	24.24666667	23.66	23.85777778	23.69111111	23.69777778	22.80444444	23.58888889	23.56555556	23.65333333
8/11/2019 11:57:55	-118.5141741	42.5435264	1239.5144	-118.5141583	42.54352043	1234.2436	-118.5141691	42.5435348	1234.948	8/11/2019 11:58:54	22.90222222	22.42222222	22.39777778	22.71666667	22.64777778	22.56777778	22.71333333	22.25	22.36111111	22.36666667	22.76555556	22.56555556	22.57888889	22.57666667	22.41111111	22.45	22.27777778	22.41888889	22.41222222	22.24666667	22.15444444	22.20666667	22.38333333	22.24555556	22.26	22.19666667	22.00222222	22.00222222	22.03333333	22.02333333	22.22777778	21.81333333	21.86333333	21.76777778	21.76777778	20.88	21.77777778	21.57444444	21.86333333
8/11/2019 11:57:56	-118.5142055	42.54353587	1239.471129	-118.5141894	42.54352991	1234.228839	-118.5141844	42.54355053	1234.759258	8/11/2019 11:58:55	20.52555556	20.15444444	20.13555556	20.45222222	20.40222222	20.24777778	20.36	20.07222222	19.99	20.11222222	20.50333333	20.24555556	20.28666667	20.35555556	20.10666667	20.17666667	20.06333333	20.23555556	19.99666667	19.88888889	19.88888889	19.88666667	19.96777778	19.88333333	19.91111111	20.00222222	19.68333333	19.83666667	19.68	19.78666667	19.94444444	19.48	19.40777778	19.32666667	19.64222222	18.58444444	19.50777778	19.36111111	19.54444444
8/11/2019 11:57:57	-118.5142388	42.54354627	1239.509968	-118.5142225	42.54354032	1234.259416	-118.5142051	42.54356528	1234.751935	8/11/2019 11:58:56	16.65333333	16.29888889	16.31777778	16.55444444	16.52444444	16.21666667	16.35666667	15.98333333	15.97	16.13666667	16.26777778	16.15444444	16.15	16.10888889	16.03	16.03777778	15.88444444	15.98777778	15.80222222	15.78444444	15.68444444	15.75333333	15.79666667	15.73444444	15.80888889	15.73888889	15.59777778	15.68777778	15.62333333	15.58	15.86666667	15.21	15.37666667	15.41444444	16.00666667	14.7	15.84	15.33888889	15.62888889
8/11/2019 11:57:58	-118.5142739	42.54355745	1239.594194	-118.5142572	42.54355147	1234.322039	-118.5142491	42.54357857	1234.686	8/11/2019 11:58:57	15.09888889	14.75222222	14.55666667	14.93111111	14.88222222	14.66111111	14.67444444	14.28777778	14.27222222	14.36	14.56444444	14.47333333	14.55444444	14.47888889	14.38111111	14.41888889	14.08444444	14.20777778	14.09666667	14.09777778	14.05222222	14.08111111	14.11222222	13.99222222	14.02777778	14.07444444	13.78555556	13.88888889	13.80666667	13.83222222	14.08111111	13.57111111	13.71888889	13.79	14.3	13.23444444	14.02111111	13.60666667	13.96222222
8/11/2019 11:57:59	-118.5143102	42.54356838	1239.673226	-118.5142916	42.543562	1234.372984	-118.5142986	42.54356437	1234.589613	8/11/2019 11:58:58	14.579	14.236	14.199	14.39	14.383	14.047	14.306	13.838	13.786	13.833	14.173	13.986	14.003	14.068	13.877	13.909	13.622	13.755	13.622	13.6	13.497	13.59	13.652	13.554	13.489	13.53	13.285	13.397	13.366	13.332	13.613	13.088	13.211	13.368	13.943	12.78	14.122	13.278	13.467
8/11/2019 11:58:00	-118.5143473	42.54357942	1239.731	-118.5143296	42.54357357	1234.40366	-118.5143475	42.54355742	1234.7474	8/11/2019 11:58:59	15.71333333	15.25222222	15.31888889	15.53666667	15.58666667	15.20666667	15.38777778	14.92777778	14.96888889	15.05444444	15.23111111	15.06111111	15.16777778	15.19222222	14.99666667	15.05	14.83888889	14.93888889	14.72888889	14.69222222	14.53222222	14.78555556	14.84777778	14.52777778	14.69555556	14.68444444	14.31777778	14.57888889	14.44333333	14.47555556	14.64222222	14.13222222	14.20555556	14.24444444	14.98555556	13.74888889	14.56222222	14.3	14.32
8/11/2019 11:58:01	-118.5143868	42.54359136	1239.763516	-118.5143687	42.5435857	1234.402381	-118.514386	42.54356888	1234.904774	8/11/2019 11:59:00	18.07777778	18.08111111	17.87444444	17.97666667	17.88555556	17.77666667	18.01555556	17.45555556	17.44444444	17.53333333	17.83555556	17.64777778	17.65333333	17.63333333	17.54666667	17.50333333	17.26222222	17.39	17.28222222	17.12777778	17.11555556	17.14	17.25666667	17.04555556	17.09666667	17.02888889	16.8	16.92111111	16.88	16.86555556	17.00555556	16.38111111	16.61888889	16.84111111	17.22555556	15.92222222	17.31555556	16.32	16.87444444
8/11/2019 11:58:02	-118.5144275	42.54360358	1239.739516	-118.5144096	42.54359813	1234.353971	-118.5144254	42.54358268	1235.000968	8/11/2019 11:59:01	22.73444444	22.33555556	22.33777778	22.55666667	22.50888889	22.20333333	22.38777778	21.98222222	22.00111111	22.03333333	22.30222222	22.16222222	22.13444444	21.99666667	21.93444444	21.92	21.69555556	21.89333333	21.68888889	21.50777778	21.43333333	21.53333333	21.52111111	21.44666667	21.48	21.34444444	21.14	21.14444444	21.20666667	21.11333333	21.36	20.92777778	20.91777778	20.99777778	20.96222222	20.45222222	21.36555556	20.61555556	20.93
8/11/2019 11:58:03	-118.5144704	42.54361622	1239.709548	-118.5144521	42.54361061	1234.314223	-118.5144729	42.54359401	1235.074548	8/11/2019 11:59:02	22.77666667	22.41777778	22.40222222	22.47777778	22.52444444	22.19111111	22.29444444	21.98	21.92	21.97777778	22.25	22.01444444	22.13777778	21.99888889	21.91222222	21.87777778	21.67333333	21.79	21.61555556	21.55555556	21.36111111	21.43444444	21.52888889	21.44	21.46222222	21.34333333	21.02444444	21.14444444	21.05333333	21.04333333	21.24333333	20.70888889	20.93222222	20.94111111	21.69	20.35222222	21.20222222	20.76111111	20.85333333
8/11/2019 11:58:04	-118.5145132	42.54362876	1239.697097	-118.5144957	42.54362323	1234.281019	-118.5145189	42.5436133	1234.939355	8/11/2019 11:59:03	20.16333333	19.77	19.82888889	20.01888889	19.71555556	19.64111111	19.7	19.43555556	19.16111111	19.32444444	19.59666667	19.41111111	19.41888889	19.44	19.26333333	19.26666667	19.06666667	19.22	18.89444444	18.94	18.73555556	18.80777778	18.91777778	18.74222222	18.79777778	18.78888889	18.54555556	18.66555556	18.54	18.57444444	18.80333333	18.25111111	18.37666667	18.59111111	19.27333333	18.11	18.79666667	18.32888889	18.50888889
8/11/2019 11:58:05	-118.5145549	42.5436412	1239.705	-118.5145372	42.54363552	1234.27028	-118.5145269	42.5436431	1234.7854	8/11/2019 11:59:04	21.01222222	20.62777778	20.69555556	20.83666667	20.80444444	20.67888889	20.72555556	20.29444444	20.30666667	20.33444444	20.64222222	20.50555556	20.41888889	20.51555556	20.25	20.34888889	19.98	20.09	20.00111111	19.94777778	19.77777778	19.82777778	19.88666667	19.77666667	19.83777778	19.85666667	19.50222222	19.57555556	19.52333333	19.43222222	19.81888889	19.16	19.33888889	19.42333333	19.58222222	18.81333333	19.41888889	19.07444444	19.22888889
8/11/2019 11:58:06	-118.5145959	42.54365362	1239.714645	-118.5145781	42.54364776	1234.260584	-118.5145454	42.54365973	1234.793355	8/11/2019 11:59:05	21.84777778	21.51111111	21.40333333	21.67333333	21.55222222	21.26777778	21.47888889	21.13444444	21.00222222	21.03111111	21.40444444	21.22222222	21.15222222	21.13666667	21.00111111	21.06888889	20.78	20.93	20.70666667	20.64222222	20.52	20.52	20.64444444	20.46222222	20.46777778	20.57444444	20.16777778	20.35555556	20.20666667	20.18333333	20.42333333	19.74111111	20.09666667	20.15777778	20.56	19.37888889	20.35777778	19.73555556	20.10888889
8/11/2019 11:58:07	-118.5146349	42.54366571	1239.75029	-118.5146169	42.54365965	1234.275868	-118.5145841	42.543672	1234.889839	8/11/2019 11:59:06	25.06777778	24.91888889	24.70444444	25.08	24.98222222	24.71777778	24.78666667	24.38333333	24.37111111	24.46111111	24.72111111	24.47444444	24.55666667	24.46555556	24.34888889	24.31111111	24.04666667	24.22555556	24.06777778	23.98222222	23.89888889	23.83555556	24.08888889	23.81	23.82	23.76777778	23.44555556	23.55	23.45111111	23.52	23.60555556	23.15111111	23.25666667	23.31222222	23.51666667	22.79777778	23.38555556	22.98	22.88333333
8/11/2019 11:58:08	-118.5146718	42.54367672	1239.7958	-118.5146519	42.54367005	1234.297317	-118.514624	42.5436821	1235.0252	8/11/2019 11:59:07	25.71777778	25.61333333	25.56888889	25.65	25.55666667	25.32888889	25.50555556	25.00111111	25.00444444	25.03666667	25.32888889	25.15111111	25.13777778	25.15666667	24.97555556	24.99666667	24.75777778	24.83111111	24.61555556	24.62	24.47111111	24.53111111	24.58666667	24.45111111	24.4	24.37111111	24.03555556	24.11555556	24.02333333	24.09333333	24.28666667	23.79888889	23.70333333	23.80444444	24.17	23.35222222	23.95555556	23.30888889	23.41666667
8/11/2019 11:58:09	-118.5147072	42.54368681	1239.842613	-118.5146887	42.54368087	1234.289052	-118.5146651	42.54369422	1235.109	8/11/2019 11:59:08	24.86	24.406	24.35	24.621	24.492	24.396	24.441	24.037	24.058	24.115	24.265	24.153	24.226	24.21	23.971	24.076	23.756	23.901	23.721	23.598	23.552	23.513	23.6	23.435	23.531	23.395	23.203	23.184	23.066	23.179	23.283	22.741	22.961	22.809	23.179	22.36	22.936	22.455	22.584
8/11/2019 11:58:10	-118.514743	42.5436968	1239.877387	-118.514724	42.54369105	1234.299335	-118.5147017	42.54370465	1235.185355	8/11/2019 11:59:09	20.65444444	20.27555556	20.25777778	20.63888889	20.48222222	20.15888889	20.37777778	19.97	19.93555556	19.96333333	20.23111111	20.05222222	20.06111111	19.99	19.81333333	19.87333333	19.59888889	19.79	19.58666667	19.45333333	19.43333333	19.41777778	19.44444444	19.39	19.38	19.35777778	19.00555556	19.19	19.09333333	19.16333333	19.36222222	18.74777778	19.01777778	19.08111111	19.56333333	18.69222222	19.18	18.62444444	18.76666667
8/11/2019 11:58:11	-118.5147796	42.54370695	1239.952774	-118.5147601	42.54370135	1234.306052	-118.5147385	42.54371523	1235.242065	8/11/2019 11:59:10	19.67	19.47444444	19.42111111	19.48888889	19.43444444	19.26555556	19.36444444	18.98555556	19.02222222	18.96	19.32666667	19.08777778	19.14888889	19.06111111	18.89222222	18.89777778	18.68888889	18.87777778	18.71222222	18.52666667	18.54888889	18.53	18.64111111	18.54666667	18.50333333	18.37444444	18.24666667	18.29111111	18.16666667	18.24	18.56444444	17.93888889	17.96666667	17.96888889	18.27888889	17.52666667	18.33	17.90777778	18.02333333
8/11/2019 11:58:12	-118.5148164	42.54371677	1240.008839	-118.5147962	42.5437113	1234.310213	-118.514788	42.54372466	1235.178968	8/11/2019 11:59:11	17.72111111	17.46333333	17.35777778	17.64333333	17.59555556	17.38555556	17.45333333	17.04555556	17.00111111	17.17111111	17.47666667	17.17555556	17.30777778	17.30888889	17.07888889	17.00777778	16.93	16.94444444	16.79777778	16.71444444	16.55555556	16.63666667	16.72444444	16.61888889	16.68	16.53444444	16.32666667	16.45111111	16.35	16.38666667	16.55222222	15.99444444	16.08111111	15.99444444	16.56444444	15.71777778	16.48	15.79444444	16.03111111
8/11/2019 11:58:13	-118.5148528	42.54372664	1240.0548	-118.5148325	42.54372142	1234.28816	-118.5148292	42.54373468	1234.997	8/11/2019 11:59:12	15.63888889	15.44222222	15.26222222	15.71222222	15.49888889	15.34666667	15.53111111	15.11444444	15.14111111	15.23333333	15.46444444	15.15888889	15.20333333	15.20888889	15.00555556	15.13555556	14.84222222	14.97888889	14.71555556	14.68777778	14.55111111	14.62666667	14.73555556	14.63555556	14.60666667	14.63333333	14.37333333	14.41111111	14.26666667	14.26666667	14.60222222	14.01	14.13888889	14.16333333	14.68666667	13.69333333	14.54555556	13.91333333	14.11777778
8/11/2019 11:58:14	-118.5148894	42.54373669	1240.047323	-118.5148672	42.54373107	1234.24971	-118.514862	42.54374092	1234.853935	8/11/2019 11:59:13	15.48111111	15.32666667	15.23666667	15.51444444	15.23222222	15.20777778	15.29111111	14.89555556	14.85111111	14.90666667	15.24333333	14.94333333	14.96111111	14.94666667	14.76777778	14.82	14.66555556	14.67	14.54111111	14.46333333	14.43444444	14.38111111	14.58222222	14.33333333	14.41444444	14.42111111	14.00444444	14.13555556	14.11333333	14.12	14.29777778	13.80888889	13.74555556	13.82555556	14.51444444	13.29	14.12333333	13.74111111	13.81444444
8/11/2019 11:58:15	-118.5149258	42.5437472	1240.086419	-118.5149053	42.54374193	1234.254484	-118.5149225	42.54373586	1234.936516	8/11/2019 11:59:14	15.33111111	15.06222222	15.13333333	15.30777778	15.25111111	15.03444444	15.10555556	14.72222222	14.73	14.79666667	15.02666667	14.79222222	14.88111111	14.83444444	14.69666667	14.72555556	14.42333333	14.59	14.37222222	14.34777778	14.17333333	14.28	14.37444444	14.14	14.22333333	14.17888889	13.88	14.05222222	13.81777778	13.89777778	14.10666667	13.50888889	13.43777778	13.88	14.21444444	13.03555556	14.16111111	13.67444444	13.57333333
8/11/2019 11:58:16	-118.5149618	42.54375769	1240.162097	-118.5149414	42.54375235	1234.309	-118.5149685	42.54373919	1235.159161	8/11/2019 11:59:15	15.29444444	15.11111111	15.02444444	15.37	15.15222222	14.94888889	15.11666667	14.73222222	14.73	14.69444444	15.05222222	14.88222222	14.79222222	14.81111111	14.63888889	14.70222222	14.54444444	14.57111111	14.48444444	14.28888889	14.27444444	14.18444444	14.31555556	14.09666667	14.23777778	14.19222222	13.81444444	13.90666667	13.92666667	13.83333333	14.17222222	13.54	13.66222222	14.02666667	14.31888889	13.34777778	14.00555556	13.41666667	13.76111111
8/11/2019 11:58:17	-118.5149972	42.54376732	1240.201	-118.5149764	42.54376214	1234.352867	-118.5150058	42.54375548	1235.212367	8/11/2019 11:59:16	16.32111111	15.97777778	16.13666667	16.30444444	16.09777778	15.95666667	16.04666667	15.63222222	15.67	15.70444444	15.99777778	15.79333333	15.80333333	15.77	15.51111111	15.64777778	15.34	15.44222222	15.34666667	15.23	15.12333333	15.17555556	15.24888889	15.06	15.13777778	15.10444444	14.80555556	14.90666667	14.79	14.70333333	15.01111111	14.49555556	14.54	14.65777778	15.03888889	14.30888889	14.97555556	14.40666667	14.67333333
8/11/2019 11:58:18	-118.5150324	42.54377666	1240.196452	-118.5150121	42.54377183	1234.347487	-118.5150169	42.5437674	1234.831839	8/11/2019 11:59:17	15.589	15.347	15.33	15.433	15.403	15.17	15.317	14.854	14.969	14.918	15.244	15.006	15.032	14.991	14.74	14.835	14.603	14.757	14.621	14.423	14.365	14.491	14.516	14.327	14.463	14.325	14.066	14.207	14.1	14.176	14.439	13.721	13.78	13.982	14.514	13.452	14.503	13.82	14.067
8/11/2019 11:58:19	-118.5150689	42.54378582	1240.234452	-118.515049	42.54378124	1234.381	-118.51504	42.54377855	1234.407097	8/11/2019 11:59:18	16.13	15.93333333	15.71333333	16.06333333	16.02444444	15.77111111	16.02888889	15.61	15.52666667	15.76777778	15.99222222	15.85888889	15.83666667	15.83222222	15.62	15.72222222	15.43777778	15.57444444	15.49222222	15.31444444	15.25666667	15.30111111	15.47555556	15.24	15.23555556	15.3	15.04444444	15.04555556	14.99777778	15.04555556	15.14666667	14.73888889	14.71333333	14.88111111	15.54444444	14.31333333	15.24666667	14.49333333	14.69888889
8/11/2019 11:58:20	-118.5151059	42.54379508	1240.188	-118.5150864	42.54379049	1234.386781	-118.5150582	42.54380116	1234.156645	8/11/2019 11:59:19	17.23444444	16.91555556	16.90888889	17.14111111	17.14222222	17.03444444	17.14111111	16.76	16.71	16.84222222	17.20222222	16.96888889	16.89333333	17.04	16.8	16.78777778	16.61	16.72777778	16.61222222	16.43333333	16.44333333	16.51444444	16.55444444	16.48222222	16.41333333	16.40333333	16.2	16.18	16.16	16.07333333	16.37222222	15.82777778	15.85	15.71444444	15.94555556	15.33	15.89333333	15.59555556	15.76777778
8/11/2019 11:58:21	-118.5151419	42.5438048	1240.1344	-118.5151228	42.54380003	1234.38826	-118.5150988	42.5438238	1234.0034	8/11/2019 11:59:20	17.52777778	17.05444444	17.08555556	17.38666667	17.17333333	17.05777778	17.15333333	16.84333333	16.89555556	16.97777778	17.33888889	17.12777778	17.08777778	17.1	16.98	16.96	16.84666667	16.86777778	16.76222222	16.70888889	16.59444444	16.69777778	16.69888889	16.61888889	16.59777778	16.69888889	16.38111111	16.52666667	16.37666667	16.39444444	16.69666667	16.02333333	15.97555556	15.97444444	16.17888889	15.29777778	16.39111111	15.69888889	15.96777778
8/11/2019 11:58:22	-118.5151777	42.54381453	1240.130968	-118.5151589	42.54380949	1234.41109	-118.5151405	42.54384058	1233.894742	8/11/2019 11:59:21	17.17777778	16.63666667	16.86	16.99666667	16.91222222	16.76111111	16.95666667	16.50777778	16.53555556	16.62555556	16.92111111	16.66666667	16.71333333	16.78	16.57333333	16.59333333	16.36888889	16.44444444	16.35222222	16.24222222	16.20222222	16.18222222	16.31333333	16.13444444	16.30555556	16.16666667	15.98555556	15.99555556	16.03666667	16.01777778	16.15666667	15.71555556	15.7	15.68666667	16.31444444	15.18444444	15.87	15.58222222	15.74
8/11/2019 11:58:23	-118.5152134	42.54382505	1240.092935	-118.515195	42.54381966	1234.435148	-118.5151729	42.54385585	1233.894548	8/11/2019 11:59:22	17.47666667	17.30555556	17.20666667	17.66333333	17.62888889	17.37666667	17.45333333	17.00444444	16.98888889	17.26555556	17.49555556	17.25222222	17.31333333	17.35888889	17.11888889	17.21333333	17.02666667	17.11666667	17.00777778	16.81222222	16.78111111	16.79666667	16.86444444	16.70888889	16.77555556	16.68222222	16.53222222	16.60111111	16.56666667	16.57	16.86111111	16.20333333	16.23111111	16.30888889	16.78777778	15.79111111	16.84333333	15.95666667	16.34666667
8/11/2019 11:58:24	-118.5152497	42.5438351	1240.152355	-118.5152315	42.54382945	1234.5103	-118.5152325	42.54385278	1234.142355	8/11/2019 11:59:23	16.96666667	16.92222222	16.86333333	17.26222222	16.99222222	16.83777778	17.01222222	16.61888889	16.74111111	16.75444444	16.96111111	16.82777778	16.85222222	16.88666667	16.70888889	16.69888889	16.57666667	16.61333333	16.51888889	16.47444444	16.29	16.38333333	16.43444444	16.41	16.42111111	16.41555556	16.09333333	16.28888889	16.15333333	16.16111111	16.46444444	15.89	15.88666667	15.89777778	16.25555556	15.40444444	16.35222222	15.77666667	15.97666667
8/11/2019 11:58:25	-118.5152867	42.54384485	1240.132968	-118.5152689	42.54383905	1234.5201	-118.5152911	42.54383731	1234.075677	8/11/2019 11:59:24	17.71444444	17.64666667	17.57888889	17.94	17.73111111	17.49222222	17.71666667	17.44444444	17.39333333	17.42333333	17.74222222	17.50888889	17.57888889	17.46555556	17.36333333	17.47222222	17.28	17.34111111	17.24888889	17.19222222	17.13888889	17.18555556	17.22444444	17.15333333	17.16	17.19444444	16.87888889	17.02444444	17	17.13	17.25333333	16.64	16.84888889	16.84111111	17.13888889	16.15888889	17.16666667	16.59333333	16.94777778
8/11/2019 11:58:26	-118.5153236	42.54385464	1240.076	-118.5153056	42.54384861	1234.47524	-118.5153291	42.54383746	1233.864	8/11/2019 11:59:25	24.56222222	24.12	24.29555556	24.53555556	24.57111111	24.41888889	24.50111111	24.28666667	24.36555556	24.30444444	24.73555556	24.41111111	24.49666667	24.50444444	24.33111111	24.36	24.13666667	24.3	24.17888889	24.09	23.96666667	24.02333333	24.18444444	24.08777778	24.17888889	23.97111111	23.72777778	23.79222222	23.88888889	23.80555556	24.08555556	23.56	23.57333333	23.39222222	23.72333333	23.03444444	23.43888889	23.35	23.62888889
8/11/2019 11:58:27	-118.5153608	42.54386414	1239.999258	-118.5153431	42.54385816	1234.403913	-118.5153527	42.54384577	1233.756452	8/11/2019 11:59:26	20.146	19.745	19.947	20.141	20.122	20.002	20.142	19.795	19.799	19.864	20.248	20.025	20.032	19.987	19.941	19.896	19.746	19.869	19.729	19.589	19.562	19.578	19.749	19.553	19.713	19.637	19.39	19.535	19.318	19.458	19.688	19.176	19.179	19.1	19.352	18.711	19.248	19.181	19.338
8/11/2019 11:58:28	-118.5153979	42.54387372	1239.97871	-118.5153789	42.54386721	1234.412658	-118.515376	42.54386424	1233.721968	8/11/2019 11:59:27	15.64888889	15.46555556	15.43	15.75	15.49888889	15.46666667	15.59666667	15.12888889	15.16444444	15.27888889	15.53444444	15.25777778	15.38222222	15.35666667	15.24222222	15.3	15.06333333	15.20555556	15.12222222	15.04111111	15	15.00111111	15.12888889	14.88222222	15.01777778	15.05	14.76333333	14.87555556	14.82333333	14.86666667	15.13222222	14.50888889	14.69444444	14.54	15.03888889	14.30666667	15.03	14.73777778	14.8
8/11/2019 11:58:29	-118.515434	42.5438832	1239.969613	-118.5154162	42.54387658	1234.422519	-118.5153976	42.54388902	1233.502677	8/11/2019 11:59:28	15.47555556	15.29666667	15.23666667	15.54111111	15.43	15.27222222	15.28555556	14.99888889	14.91444444	14.98777778	15.29333333	15.12222222	15.25777778	15.13666667	14.98777778	15.00333333	14.86555556	14.91444444	14.78111111	14.71	14.68666667	14.76666667	14.83222222	14.73888889	14.74555556	14.77777778	14.49777778	14.61666667	14.53333333	14.56666667	14.81555556	14.37	14.32666667	14.39111111	14.72111111	14.00444444	14.70333333	14.34555556	14.41333333
8/11/2019 11:58:30	-118.5154542	42.54388648	1239.9212	-118.5154366	42.54387938	1234.4042	-118.515414	42.54389886	1233.186	8/11/2019 11:59:29	15.27555556	14.89111111	14.82555556	15.19444444	15.05	14.82777778	14.96333333	14.52777778	14.62222222	14.72111111	15.07222222	14.77444444	14.80111111	14.79555556	14.63222222	14.68888889	14.56	14.53666667	14.48	14.22333333	14.37	14.34777778	14.53777778	14.27777778	14.43333333	14.44222222	14.22777778	14.31555556	14.24	14.27222222	14.53555556	14.04777778	14.08666667	14.16777778	14.55777778	13.74777778	14.52333333	14.08555556	14.19777778
8/11/2019 11:58:31	-118.5154661	42.54387709	1239.859742	-118.5154486	42.54386983	1234.3597	-118.5154295	42.54388947	1232.853774	8/11/2019 11:59:30	15.50444444	15.25666667	15.17444444	15.36222222	15.35888889	15.21222222	15.38111111	14.92666667	14.90333333	14.98	15.34222222	15.05333333	15.13555556	15.07888889	14.94333333	14.96444444	14.79222222	14.99444444	14.82	14.73666667	14.72444444	14.73222222	14.82111111	14.74444444	14.74333333	14.63	14.49	14.63777778	14.52666667	14.52777778	14.89777778	14.31222222	14.29888889	14.53888889	14.86666667	14.13333333	14.87333333	14.25888889	14.64666667
8/11/2019 11:58:32	-118.5154823	42.54385664	1239.862742	-118.5154649	42.54384941	1234.368571	-118.5154682	42.54385719	1232.886839	8/11/2019 11:59:31	17.45888889	16.96555556	16.86555556	17.22	17.15111111	16.77444444	17.05444444	16.64444444	16.57444444	16.65333333	16.98222222	16.76888889	16.75666667	16.74222222	16.51888889	16.66	16.41111111	16.50222222	16.35	16.24888889	16.16777778	16.21444444	16.41222222	16.28	16.28777778	16.28222222	16.00111111	16.21	16.08333333	16.12777778	16.40222222	15.91666667	15.93111111	16.28888889	16.64888889	15.73222222	16.28444444	15.77666667	16.28555556
8/11/2019 11:58:33	-118.5154941	42.54383802	1239.822484	-118.5154771	42.54383066	1234.365645	-118.5154955	42.54382897	1232.990968	8/11/2019 11:59:32	17.79	17.58444444	17.62666667	17.80222222	17.72444444	17.48888889	17.7	17.21333333	17.16666667	17.30888889	17.65777778	17.28888889	17.36	17.39444444	17.13777778	17.28	17.04111111	17.12777778	17.06888889	16.92777778	16.82555556	16.84	16.97555556	16.79666667	16.81555556	16.84444444	16.61222222	16.70111111	16.65	16.73555556	16.90222222	16.32333333	16.35777778	16.66111111	17.05333333	16.16555556	16.9	16.38777778	16.62666667
8/11/2019 11:58:34	-118.5154885	42.54383002	1239.797419	-118.5154718	42.5438223	1234.416877	-118.5154982	42.54381492	1233.183645	8/11/2019 11:59:33	18.19222222	18.00333333	17.95111111	18.23888889	18.27444444	17.98333333	18.04666667	17.58444444	17.63888889	17.79	18.11666667	17.82555556	17.85	17.91333333	17.61555556	17.67777778	17.41777778	17.49888889	17.39111111	17.30111111	17.32111111	17.18444444	17.36222222	17.25666667	17.30777778	17.34	17.04111111	17.15444444	17.05	17.10777778	17.36555556	16.84222222	16.77	16.94	17.30888889	16.51111111	17.27666667	16.79111111	16.97444444
8/11/2019 11:58:35	-118.5154593	42.54381694	1239.8656	-118.5154442	42.54380961	1234.49946	-118.5154723	42.54380076	1233.389	8/11/2019 11:59:34	17.01444444	16.88444444	16.59111111	16.92666667	16.90777778	16.58444444	16.81	16.37111111	16.36444444	16.31222222	16.72666667	16.43555556	16.45333333	16.49666667	16.27777778	16.36555556	16.15888889	16.26333333	16.15444444	15.98222222	15.97666667	15.97666667	16.10555556	15.94666667	16.04111111	15.95666667	15.74888889	15.83777778	15.67333333	15.7	16.02222222	15.48	15.54444444	15.81222222	16.27222222	15.16666667	16.04888889	15.46111111	15.71444444
8/11/2019 11:58:36	-118.5154055	42.54379643	1239.871935	-118.5153913	42.5437891	1234.501532	-118.5154188	42.54378501	1233.533677	8/11/2019 11:59:35	17.89111111	17.72888889	17.72444444	17.82333333	17.95555556	17.68333333	17.81777778	17.36	17.37222222	17.35888889	17.66	17.43111111	17.49111111	17.42222222	17.35111111	17.31444444	17.16333333	17.22777778	17.14555556	16.94555556	16.95111111	16.94555556	17.02666667	16.84444444	16.89888889	16.83888889	16.60666667	16.70555556	16.64333333	16.64444444	16.86555556	16.26777778	16.48444444	16.34444444	16.77	15.96111111	16.80777778	16.27777778	16.40444444
8/11/2019 11:58:37	-118.5153414	42.54377354	1239.861548	-118.5153251	42.5437653	1234.473674	-118.515355	42.54377499	1233.77429	8/11/2019 11:59:36	19.253	19.014	18.953	19.059	19.103	18.884	18.952	18.6	18.548	18.699	19.018	18.75	18.748	18.83	18.512	18.611	18.446	18.496	18.389	18.224	18.175	18.182	18.202	18.217	18.159	18.135	17.889	17.917	17.887	17.875	18.158	17.58	17.645	17.708	17.785	17.093	17.767	17.252	17.613
8/11/2019 11:58:38	-118.5152773	42.54375016	1239.762484	-118.5152631	42.54374258	1234.383661	-118.5152879	42.54375134	1234.030161	8/11/2019 11:59:37	16.48111111	16.14777778	16.27666667	16.46888889	16.43111111	16.18666667	16.27888889	15.95111111	15.96555556	16.10222222	16.36777778	16.12333333	16.17888889	16.18	16.05	16.15222222	15.89333333	15.94666667	15.80333333	15.68444444	15.62333333	15.63111111	15.7	15.66222222	15.58222222	15.60111111	15.36222222	15.43777778	15.41	15.43777778	15.70666667	15.07666667	15.04111111	15.17	15.35444444	14.59222222	15.46444444	15.08111111	15.10111111
8/11/2019 11:58:39	-118.515213	42.5437272	1239.641129	-118.5151962	42.54371856	1234.262171	-118.5152168	42.54371597	1234.107871	8/11/2019 11:59:38	17.98222222	17.48777778	17.57333333	17.78222222	17.63222222	17.54444444	17.44888889	17.12222222	17.17777778	17.23222222	17.5	17.33333333	17.24666667	17.28666667	17.09777778	17.07	16.93666667	16.96222222	16.83666667	16.66555556	16.59666667	16.56	16.70777778	16.60222222	16.68222222	16.61555556	16.36777778	16.32111111	16.28333333	16.34222222	16.53666667	16.00777778	15.93777778	15.96	16.72555556	15.75888889	16.45777778	15.97333333	15.99777778
8/11/2019 11:58:40	-118.5151528	42.54370642	1239.6122	-118.5151368	42.54369809	1234.24826	-118.5151551	42.54369244	1234.2048	8/11/2019 11:59:39	21.47444444	21.24555556	21.17111111	21.23555556	21.19666667	20.90555556	21.12333333	20.66666667	20.66222222	20.80444444	21.05444444	20.86	20.83444444	20.75555556	20.57111111	20.59111111	20.38333333	20.60222222	20.37777778	20.19111111	20.08888889	20.08444444	20.18555556	20.02	20.06777778	20.06111111	19.77222222	19.85666667	19.77	19.72777778	20.01111111	19.33111111	19.42333333	19.42888889	19.81333333	18.97888889	19.59	19.11666667	19.41222222
8/11/2019 11:58:41	-118.5150979	42.54368725	1239.626484	-118.5150832	42.54367953	1234.251003	-118.5151024	42.54367186	1234.316839	8/11/2019 11:59:40	18.98333333	18.83888889	18.58	18.84222222	18.79666667	18.43222222	18.57555556	18.19777778	18.30111111	18.28555556	18.56111111	18.39444444	18.33888889	18.31888889	18.14111111	18.13333333	17.96444444	18.00333333	17.93555556	17.77888889	17.78111111	17.66	17.78555556	17.65222222	17.56555556	17.53888889	17.32333333	17.36444444	17.35666667	17.27111111	17.55555556	16.99111111	17.21444444	17.28777778	17.52444444	16.59222222	17.61	16.97888889	17.25555556
8/11/2019 11:58:42	-118.5150492	42.54367054	1239.683419	-118.5150326	42.54366234	1234.258768	-118.5150528	42.54365613	1234.401	8/11/2019 11:59:41	17.49444444	17.23777778	17.16111111	17.42666667	17.22888889	17.09777778	17.20111111	16.79777778	16.76555556	16.74222222	17.08666667	16.86333333	16.86333333	16.83	16.64888889	16.66	16.52555556	16.50666667	16.31777778	16.19888889	16.10111111	16.06	16.21	16.08	16.13	15.99666667	15.86	15.85777778	15.72666667	15.80222222	15.92111111	15.43	15.49444444	15.85	16.35777778	15.20777778	16.23666667	15.56555556	15.91555556
8/11/2019 11:58:43	-118.5150087	42.54365692	1239.78929	-118.5149922	42.54364896	1234.263581	-118.515025	42.54365575	1234.469548	8/11/2019 11:59:42	18.84555556	18.69777778	18.29333333	18.70444444	18.59333333	18.35555556	18.57333333	18.17777778	18.11222222	18.05555556	18.42777778	18.10111111	18.20666667	18.15444444	17.87777778	17.93666667	17.73666667	17.75555556	17.65888889	17.46888889	17.4	17.36444444	17.43555556	17.3	17.43888889	17.31555556	17.04666667	17.09444444	16.93666667	17.04	17.29222222	16.74666667	16.9	17.29666667	17.57555556	16.64222222	17.52555556	16.78333333	16.96888889
8/11/2019 11:58:44	-118.5149752	42.54364568	1239.89	-118.5149596	42.54363828	1234.25244	-118.5150054	42.5436594	1234.4934	8/11/2019 11:59:43	20.72444444	20.62111111	20.36888889	20.62333333	20.66	20.41333333	20.41333333	20.01111111	20.03111111	20.09333333	20.35222222	20.12444444	20.11888889	20.06111111	19.90111111	19.91	19.64555556	19.70333333	19.50333333	19.44333333	19.32777778	19.27777778	19.38	19.18111111	19.23	19.18111111	18.93222222	18.95222222	18.92333333	18.91	19.14555556	18.60222222	18.80222222	18.93444444	19.41111111	18.53444444	19.13111111	18.66666667	18.84111111
8/11/2019 11:58:45	-118.514946	42.54363584	1239.965806	-118.5149302	42.54362858	1234.236281	-118.5149765	42.54365287	1234.486839	8/11/2019 11:59:44	22.22777778	22.04444444	22.08222222	22.24888889	22.19222222	21.90333333	21.95333333	21.62555556	21.64111111	21.65111111	21.94111111	21.70888889	21.72	21.63111111	21.44	21.42333333	21.24777778	21.31555556	21.09222222	20.98666667	20.92666667	20.97444444	20.99333333	20.84333333	20.87555556	20.81444444	20.53555556	20.59333333	20.48666667	20.47777778	20.63222222	20.21666667	20.26888889	20.43777778	20.78222222	20.03444444	20.69444444	20.03333333	20.21333333
8/11/2019 11:58:46	-118.5149194	42.54362719	1239.967677	-118.5149025	42.54361951	1234.198913	-118.5149237	42.54362484	1234.454065	8/11/2019 11:59:45	23.135	22.996	22.723	22.892	22.798	22.648	22.671	22.242	22.343	22.278	22.614	22.429	22.444	22.274	22.193	22.153	21.953	22.078	21.931	21.625	21.666	21.607	21.694	21.559	21.566	21.519	21.173	21.288	21.148	21.178	21.501	20.97	21.013	21.341	21.629	20.725	21.364	20.821	20.986
8/11/2019 11:58:47	-118.5148954	42.54361946	1240.0066	-118.5148785	42.54361164	1234.26418	-118.5148835	42.54360172	1234.4762	8/11/2019 11:59:46	23.88111111	23.71555556	23.65111111	23.77888889	23.88888889	23.58222222	23.66111111	23.30666667	23.32444444	23.45111111	23.63555556	23.31888889	23.4	23.17888889	23.13777778	23.14666667	22.99888889	22.99222222	22.83111111	22.67666667	22.66222222	22.56444444	22.80555556	22.54	22.49888889	22.62222222	22.26444444	22.33666667	22.18777778	22.26111111	22.44444444	21.92555556	22.03555556	22.14666667	22.29111111	21.75444444	22.12777778	21.68555556	22.04333333
8/11/2019 11:58:48	-118.5148732	42.54361204	1240.124774	-118.5148565	42.5436041	1234.376513	-118.5148599	42.54359154	1234.596097	8/11/2019 11:59:47	25.40666667	24.93888889	24.82444444	25.08555556	24.88777778	24.69444444	24.75444444	24.39666667	24.38666667	24.44111111	24.64444444	24.45	24.47666667	24.52333333	24.21444444	24.31555556	24.11555556	24.13222222	24.02333333	24.03	23.72777778	23.76555556	23.89666667	23.78333333	23.79	23.77222222	23.43555556	23.40111111	23.35666667	23.42333333	23.60888889	23.08888889	23.19333333	23.41888889	23.52888889	22.85111111	23.41666667	22.83666667	22.96333333
8/11/2019 11:58:49	-118.5148516	42.54360493	1240.136484	-118.514835	42.54359684	1234.395932	-118.5148416	42.54358551	1234.658032	8/11/2019 11:59:48	24.24333333	24.00555556	24.05222222	24.03555556	24.01444444	23.81888889	23.81333333	23.36777778	23.46	23.53222222	23.75333333	23.61666667	23.57666667	23.66111111	23.36555556	23.57888889	23.33666667	23.35555556	23.23111111	23.12333333	23.11	23.05	23.14	23.06222222	23.01555556	22.99777778	22.71444444	22.78777778	22.61	22.78	22.93555556	22.41333333	22.40444444	22.79666667	23.04555556	21.99222222	22.45444444	22.01888889	22.05666667
8/11/2019 11:58:50	-118.5148298	42.54359795	1240.101645	-118.5148132	42.54358975	1234.360323	-118.5148249	42.54357868	1234.629097	8/11/2019 11:59:49	23.91222222	23.52111111	23.35111111	23.53222222	23.57	23.33	23.42333333	23.04666667	23.12	23.09888889	23.41666667	23.19333333	23.03222222	23.12111111	22.85222222	22.93666667	22.82111111	22.80555556	22.66888889	22.53666667	22.41111111	22.50222222	22.63111111	22.43111111	22.49444444	22.40111111	22.13222222	22.14333333	22.05666667	22.12111111	22.26333333	21.75444444	21.97555556	22.10222222	22.65888889	21.67333333	22.05777778	21.42111111	21.89666667
8/11/2019 11:58:51	-118.514808	42.54359075	1240.048613	-118.5147914	42.54358244	1234.305597	-118.5148057	42.54357012	1234.572871	8/11/2019 11:59:50	25.48111111	25.23444444	25.17333333	25.5	25.32	25.13555556	25.24444444	24.85111111	24.88888889	24.88222222	25.14777778	24.84222222	24.85666667	24.86666667	24.58	24.70666667	24.47	24.57777778	24.39555556	24.25555556	24.22333333	24.27111111	24.30333333	24.14222222	24.11222222	24.11555556	23.88111111	23.86222222	23.84	23.80222222	24.05111111	23.44888889	23.67	23.45222222	23.74	23.00111111	23.66666667	23.17777778	23.32666667
8/11/2019 11:58:52	-118.5147852	42.54358274	1239.975613	-118.5147689	42.54357438	1234.276252	-118.5147835	42.54356179	1234.542161	8/11/2019 11:59:51	25.55444444	25.37222222	25.15777778	25.34555556	25.25	25.27333333	25.19888889	24.77888889	24.87	24.97666667	25.32	25.05444444	25.04	24.96444444	24.79555556	24.83555556	24.68444444	24.68444444	24.60333333	24.38444444	24.38555556	24.25333333	24.38222222	24.24111111	24.27	24.20444444	24.03555556	23.97555556	23.85	24.02888889	24.17888889	23.66555556	23.59666667	23.69888889	24.05777778	23.23777778	23.66555556	23.24333333	23.36444444
8/11/2019 11:58:53	-118.5147623	42.54357483	1239.9393	-118.5147464	42.54356641	1234.28768	-118.5147511	42.54355416	1234.67	8/11/2019 11:59:52	24.96333333	24.63666667	24.64555556	24.73333333	24.68333333	24.50555556	24.71222222	24.14	24.19888889	24.39222222	24.63888889	24.35111111	24.33333333	24.34111111	24.13222222	24.18333333	24.00111111	24.07777778	24.01777778	23.82333333	23.77	23.67111111	23.79777778	23.58555556	23.65666667	23.59777778	23.39111111	23.37333333	23.33444444	23.25666667	23.52555556	23.06444444	23.05888889	23.16	23.36111111	22.27222222	23.01777778	22.52555556	22.73
8/11/2019 11:58:54	-118.514738	42.54356684	1239.912065	-118.5147221	42.54355816	1234.323003	-118.5147141	42.54354484	1234.914419	8/11/2019 11:59:53	21.18777778	21.12555556	21.16333333	21.04444444	21.11888889	20.95333333	21.09111111	20.61	20.65222222	20.66888889	21.13111111	20.83888889	20.77666667	20.81444444	20.64444444	20.68	20.53888889	20.59777778	20.44444444	20.26333333	20.22777778	20.16	20.32666667	20.14666667	20.22777778	20.16777778	19.93	19.98888889	19.89	20.01222222	20.19111111	19.62	19.69	19.82111111	20.54111111	19.20777778	19.95777778	19.39	19.78
8/11/2019 11:58:55	-118.5147122	42.54355788	1239.966129	-118.5146968	42.54354922	1234.399887	-118.5146892	42.54353578	1235.165226	8/11/2019 11:59:54	19.35	19.213	19.149	19.458	19.279	19.013	19.222	18.662	18.766	18.833	19.152	18.859	18.855	18.864	18.653	18.722	18.533	18.56	18.515	18.334	18.292	18.284	18.427	18.41	18.334	18.32	18.065	18.192	18.025	18.048	18.371	17.844	17.941	18.13	18.55	17.669	18.309	17.772	17.94
8/11/2019 11:58:56	-118.514686	42.54354891	1239.948613	-118.5146703	42.54354005	1234.4578	-118.5146628	42.54352579	1235.38071	8/11/2019 11:59:55	25.26333333	25.12	25.18111111	25.26555556	25.19444444	25.10555556	25.05666667	24.79111111	24.80666667	24.78555556	25.20666667	24.85333333	24.90333333	24.98666667	24.72444444	24.71888889	24.51777778	24.63777778	24.52666667	24.24555556	24.34666667	24.23111111	24.37666667	24.22555556	24.15666667	24.25	23.83777778	23.95111111	23.91222222	23.92	24.13666667	23.59666667	23.53	23.30666667	23.56888889	22.91888889	23.41	23.12666667	23.15888889
8/11/2019 11:58:57	-118.51466	42.5435401	1239.9532	-118.5146444	42.5435312	1234.50824	-118.5146431	42.54351846	1235.504	8/11/2019 11:59:56	25.52444444	25.52555556	25.56	25.54888889	25.50222222	25.33222222	25.43666667	25.01777778	25.17777778	25.26888889	25.45888889	25.30222222	25.24333333	25.27	25.10444444	25.18111111	24.93666667	24.93333333	24.91333333	24.74555556	24.60888889	24.64333333	24.76111111	24.66666667	24.60111111	24.59111111	24.26555556	24.35555556	24.25666667	24.27444444	24.49	23.92666667	24.13	24.04222222	23.80777778	23.30555556	23.89444444	23.39666667	23.61444444
8/11/2019 11:58:58	-118.5146342	42.54353132	1239.996677	-118.5146196	42.54352278	1234.544068	-118.5146253	42.5435118	1235.529935	8/11/2019 11:59:57	24.05777778	23.85555556	23.65222222	24.17888889	23.96666667	23.95222222	24.02222222	23.57222222	23.65333333	23.67333333	24.05888889	23.72444444	23.74444444	23.72111111	23.50888889	23.65777778	23.41666667	23.41111111	23.37222222	23.21333333	23.11888889	23.10222222	23.25111111	23.12111111	23.12444444	23.06444444	22.81222222	22.84666667	22.72222222	22.81	22.87222222	22.43222222	22.52888889	22.39666667	22.74555556	21.76555556	22.30777778	22.03	22.15444444
8/11/2019 11:58:59	-118.5146078	42.5435226	1239.956258	-118.5145921	42.54351369	1234.506313	-118.5145956	42.54350405	1235.597419	8/11/2019 11:59:58	21.39666667	21.11444444	21.19444444	21.37555556	21.20666667	20.99222222	21.32777778	20.84666667	20.84777778	20.90555556	21.26666667	21.02888889	20.90888889	20.96444444	20.83222222	20.88888889	20.61888889	20.68222222	20.58555556	20.47444444	20.49444444	20.43111111	20.50444444	20.34666667	20.38666667	20.37444444	20.19111111	20.25777778	20.17666667	20.21888889	20.32555556	19.84888889	19.81222222	19.84444444	20.19	19.22444444	19.92	19.39	19.78555556
8/11/2019 11:59:00	-118.5145826	42.54351406	1239.9096	-118.514567	42.54350505	1234.49258	-118.5145806	42.54348696	1235.7672	8/11/2019 11:59:59	18.40777778	18.24444444	18.24111111	18.58111111	18.27444444	18.20555556	18.32111111	17.93444444	18.02555556	18.07	18.42	18.12777778	18.12666667	18.14666667	17.96666667	18.12444444	17.84555556	17.93777778	17.82777778	17.66666667	17.6	17.53222222	17.62888889	17.53333333	17.59	17.59888889	17.28555556	17.33111111	17.35666667	17.37	17.62888889	16.88555556	16.94666667	17.15	17.38	16.26666667	17.21444444	16.59333333	17.14111111
8/11/2019 11:59:01	-118.5145586	42.54350565	1239.823097	-118.5145439	42.54349682	1234.468065	-118.5145668	42.54347321	1235.96671	8/11/2019 12:00:00	16.78444444	16.74111111	16.69777778	17.05888889	17.00888889	16.85555556	16.85111111	16.46888889	16.53555556	16.66333333	16.99333333	16.75333333	16.66222222	16.72111111	16.50555556	16.63444444	16.48111111	16.58777778	16.45333333	16.37888889	16.35	16.17222222	16.28777778	16.23	16.21888889	16.15666667	15.91111111	16.03333333	15.91666667	15.92	16.24333333	15.67555556	15.57	15.7	15.90444444	15.07777778	15.76888889	15.52555556	15.63333333
8/11/2019 11:59:02	-118.5145341	42.54349681	1239.692323	-118.5145191	42.54348771	1234.420342	-118.5145322	42.54347206	1236.031774	8/11/2019 12:00:01	17.06777778	16.89111111	16.87666667	17.26222222	17.22222222	16.96666667	17.02555556	16.69666667	16.72	16.87777778	17.15	16.90111111	16.96333333	16.95222222	16.79111111	16.90777778	16.64777778	16.68	16.65333333	16.44777778	16.45333333	16.47888889	16.65888889	16.44666667	16.42444444	16.36222222	16.12777778	16.28777778	16.11333333	16.24444444	16.37111111	15.80444444	15.82222222	15.94444444	16.28888889	15.23333333	16.07222222	15.70555556	15.78111111
8/11/2019 11:59:03	-118.5145102	42.54348847	1239.591839	-118.5144943	42.54347884	1234.388897	-118.5144846	42.54347985	1235.927258	8/11/2019 12:00:02	16.71	16.45	16.57444444	16.64555556	16.70222222	16.45111111	16.61	16.20333333	16.20888889	16.37777778	16.69777778	16.49111111	16.42555556	16.38	16.26	16.27888889	16.17888889	16.22888889	16.15777778	15.92444444	16.04333333	15.92	15.99222222	15.94666667	15.98222222	15.85888889	15.78222222	15.77333333	15.76333333	15.70333333	16.03666667	15.35222222	15.34555556	15.44222222	15.79222222	14.88888889	15.83111111	15.23333333	15.22666667
8/11/2019 11:59:04	-118.5144869	42.54348058	1239.506774	-118.514471	42.54347093	1234.36771	-118.5144558	42.54347397	1235.845774	8/11/2019 12:00:03	16.467	16.293	16.213	16.342	16.379	16.137	16.382	15.876	16.028	16.059	16.396	16.122	16.174	16.104	15.983	16.043	15.93	15.967	15.834	15.73	15.745	15.664	15.803	15.731	15.666	15.723	15.474	15.541	15.4	15.488	15.676	15.1	15.007	15.088	15.209	14.374	15.618	14.886	15.078
8/11/2019 11:59:05	-118.5144642	42.54347282	1239.4668	-118.5144487	42.54346323	1234.38088	-118.5144361	42.54346292	1235.8524	8/11/2019 12:00:04	16.76	16.65111111	16.57888889	16.85666667	16.77555556	16.65111111	16.73	16.21	16.30333333	16.44333333	16.85222222	16.53222222	16.52777778	16.53666667	16.40555556	16.41	16.25555556	16.30888889	16.31	16.16222222	16.17666667	16.13888889	16.27222222	16.09222222	16.15888889	16.07444444	15.88666667	15.84888889	15.86666667	15.95777778	16.10777778	15.52555556	15.63333333	15.8	15.67222222	14.99555556	15.82333333	15.34444444	15.52
8/11/2019 11:59:06	-118.5144415	42.54346523	1239.441097	-118.5144266	42.54345561	1234.402881	-118.5144165	42.54345198	1235.914258	8/11/2019 12:00:05	18.61333333	18.30222222	18.28777778	18.68222222	18.63	18.59777778	18.64333333	18.21	18.38222222	18.53111111	18.70222222	18.49444444	18.53444444	18.53666667	18.43444444	18.52666667	18.27	18.40666667	18.31555556	18.13333333	18.13888889	18.04111111	18.21222222	18.11111111	18.15333333	18.23777778	17.87555556	17.99222222	17.84333333	17.89333333	18.23	17.60666667	17.48444444	17.63888889	17.65111111	16.94555556	17.9	17.49333333	17.37777778
8/11/2019 11:59:07	-118.5144185	42.54345748	1239.493129	-118.5144037	42.54344779	1234.462026	-118.5143976	42.54344358	1235.997355	8/11/2019 12:00:06	21.07444444	21	21.03111111	21.2	21.15	21.07444444	21.19444444	20.85111111	20.98222222	21.03444444	21.45111111	21.14555556	21.21555556	21.15888889	21.04333333	21.10333333	20.90444444	20.99666667	20.91444444	20.74555556	20.74666667	20.75777778	20.93	20.80555556	20.74555556	20.75777778	20.52888889	20.63333333	20.50666667	20.59333333	20.84333333	20.29444444	20.20888889	20.06777778	20.17444444	19.27444444	20.05	19.92333333	19.92666667
8/11/2019 11:59:08	-118.514395	42.54344924	1239.533194	-118.5143806	42.5434397	1234.470735	-118.5143877	42.54343742	1235.955548	8/11/2019 12:00:07	19.36888889	19.08333333	19.30555556	19.57888889	19.57	19.32111111	19.49444444	19.13666667	19.16888889	19.34777778	19.68	19.41666667	19.39222222	19.43333333	19.27111111	19.37222222	19.19	19.23777778	19.19444444	19.03	19.03444444	19.04777778	19.15222222	19.01111111	19.03	19.07888889	18.90333333	18.89666667	18.83333333	18.91666667	19.15444444	18.61777778	18.57	18.45111111	18.83555556	17.74	18.47666667	18.03444444	18.60888889
8/11/2019 11:59:09	-118.5143724	42.54344164	1239.4956	-118.5143577	42.54343207	1234.42444	-118.5143689	42.5434314	1235.8652	8/11/2019 12:00:08	16.22333333	16.31111111	16.05111111	16.42	16.41222222	16.20777778	16.35111111	15.91444444	15.99444444	16.07111111	16.46	16.16	16.18111111	16.30222222	16.07	16.15111111	15.99888889	15.98444444	16.01777778	15.85111111	15.79333333	15.80666667	15.94444444	15.77444444	15.79222222	15.82	15.58444444	15.69444444	15.63666667	15.67555556	15.87222222	15.26555556	15.36666667	15.49888889	15.69	14.55222222	15.70777778	15.08222222	15.32222222
8/11/2019 11:59:10	-118.51435	42.54343405	1239.403	-118.5143351	42.54342431	1234.361245	-118.5143461	42.54342433	1235.741613	8/11/2019 12:00:09	15.70666667	15.23888889	15.29	15.55333333	15.57888889	15.38444444	15.46	15.04111111	15.08888889	15.23222222	15.55111111	15.31111111	15.32111111	15.37555556	15.14666667	15.21222222	15.1	15.12444444	15.03666667	14.91444444	14.92333333	14.97555556	15.01333333	14.81666667	14.89333333	14.94333333	14.57888889	14.71444444	14.61	14.68888889	14.95222222	14.42111111	14.48	14.37888889	15.03555556	13.95444444	14.75	14.42222222	14.56666667
8/11/2019 11:59:11	-118.5143269	42.54342603	1239.318323	-118.514312	42.54341627	1234.313126	-118.5143198	42.54341638	1235.645516	8/11/2019 12:00:10	16.28	16.06444444	16.14444444	16.51222222	16.49666667	16.17	16.22777778	15.86666667	16.00222222	16.11111111	16.36	16.18222222	16.16888889	16.17111111	16.05222222	16.09555556	15.94666667	15.94555556	15.88222222	15.6	15.74	15.65888889	15.89333333	15.61666667	15.73333333	15.73666667	15.49111111	15.61777778	15.54333333	15.58	15.85777778	15.32111111	15.36777778	15.25333333	15.54333333	14.44555556	15.52777778	14.99333333	15.24111111
8/11/2019 11:59:12	-118.5143042	42.54341783	1239.319161	-118.5142895	42.54340828	1234.293145	-118.5142969	42.54340749	1235.582516	8/11/2019 12:00:11	19.9	19.89	19.86777778	19.97333333	19.91666667	19.83	19.86111111	19.54777778	19.70777778	19.75555556	20.07888889	19.75888889	19.77444444	19.85222222	19.61777778	19.78333333	19.50777778	19.65555556	19.60444444	19.27222222	19.43888889	19.40777778	19.49888889	19.38666667	19.36111111	19.43111111	19.20555556	19.24555556	19.18333333	19.34555556	19.59555556	18.98111111	19.01777778	18.85	19.22111111	18.39555556	19.04666667	19.02888889	18.88888889
8/11/2019 11:59:13	-118.514281	42.54340924	1239.3518	-118.5142665	42.54339986	1234.28198	-118.5142746	42.54340048	1235.5498	8/11/2019 12:00:12	20.675	20.674	20.654	20.839	20.862	20.711	20.885	20.448	20.519	20.524	20.841	20.641	20.653	20.639	20.467	20.682	20.484	20.511	20.44	20.334	20.261	20.295	20.419	20.27	20.371	20.272	20.169	20.25	20.167	20.295	20.5	19.947	20.038	20.038	20.038	19.166	19.931	19.762	19.934
8/11/2019 11:59:14	-118.5142577	42.54340063	1239.37771	-118.5142435	42.54339136	1234.277597	-118.5142525	42.54339354	1235.515097	8/11/2019 12:00:13	17.73444444	17.72666667	17.73	18.09555556	17.91333333	17.71444444	17.88111111	17.54555556	17.50666667	17.66111111	17.94222222	17.77666667	17.72777778	17.82222222	17.67666667	17.75444444	17.50777778	17.61333333	17.61555556	17.43111111	17.43333333	17.38444444	17.57	17.35222222	17.48333333	17.54555556	17.18444444	17.28333333	17.27	17.38	17.63333333	16.96777778	17.05888889	16.95333333	17.49	16.52777778	17.21777778	16.96111111	17.14888889
8/11/2019 11:59:15	-118.5142338	42.54339182	1239.387194	-118.5142195	42.54338236	1234.264729	-118.5142291	42.54338682	1235.462355	8/11/2019 12:00:14	18.46333333	18.33444444	18.34555556	18.61111111	18.66555556	18.44444444	18.54555556	18.23444444	18.31111111	18.35444444	18.69888889	18.47	18.48888889	18.52222222	18.40777778	18.38333333	18.28777778	18.38222222	18.23777778	18.10444444	18.13222222	18.12444444	18.20555556	18.23444444	18.18555556	18.24	17.89777778	18	18.05333333	18.11	18.30777778	17.73222222	17.66666667	17.72444444	17.88444444	17.12555556	17.8	17.53888889	17.53777778
8/11/2019 11:59:16	-118.5142086	42.5433827	1239.407161	-118.5141946	42.54337333	1234.259735	-118.514204	42.54337989	1235.40829	8/11/2019 12:00:15	18.95777778	18.91444444	18.99666667	19.18777778	19.21888889	19.05888889	19.02777778	18.70555556	18.75888889	18.89888889	19.29444444	18.99444444	19.08	19.08888889	18.94333333	18.99888889	18.82888889	18.98555556	18.87	18.71666667	18.75888889	18.68333333	18.94333333	18.78666667	18.80666667	18.83111111	18.49444444	18.61111111	18.56333333	18.71444444	18.89888889	18.30888889	18.37777778	18.37444444	18.63	17.52888889	18.23555556	18.07666667	18.35333333
8/11/2019 11:59:17	-118.5141834	42.54337402	1239.4356	-118.5141695	42.54336467	1234.29272	-118.5141776	42.54337208	1235.3728	8/11/2019 12:00:16	17.13444444	17.08555556	17.08	17.24666667	17.25777778	16.99111111	17.06333333	16.76111111	16.81777778	16.89333333	17.20111111	16.98222222	17.10666667	17.02555556	16.89	17.01	16.73555556	16.85111111	16.78666667	16.60888889	16.63777778	16.66222222	16.83444444	16.70555556	16.78333333	16.76666667	16.46777778	16.63777778	16.60333333	16.60333333	16.96	16.38444444	16.42444444	16.62555556	16.80444444	15.95333333	16.83	16.28	16.60666667
8/11/2019 11:59:18	-118.5141579	42.54336543	1239.448581	-118.5141441	42.54335607	1234.316532	-118.514152	42.54336456	1235.325581	8/11/2019 12:00:17	22.46	22.13444444	22.27444444	22.59	22.53444444	22.42888889	22.41444444	22.03111111	22.17333333	22.22222222	22.60333333	22.25555556	22.38444444	22.38222222	22.23	22.27666667	22.07444444	22.16555556	22.07777778	21.96	21.99222222	21.85555556	22.04111111	21.95333333	22.00444444	21.96333333	21.77111111	21.69333333	21.67888889	21.73777778	22.08777778	21.43333333	21.37555556	21.34222222	21.36444444	20.74666667	21.37111111	21.39777778	21.15777778
8/11/2019 11:59:19	-118.5141317	42.54335677	1239.468903	-118.514118	42.54334739	1234.325848	-118.5141255	42.54335521	1235.249613	8/11/2019 12:00:18	27.39888889	27.50444444	27.37666667	27.62777778	27.61222222	27.48444444	27.59222222	27.22333333	27.31666667	27.41888889	27.78333333	27.57444444	27.54444444	27.50555556	27.33333333	27.47111111	27.26444444	27.39	27.26333333	27.13777778	27.04555556	27.01111111	27.10333333	27.06888889	27.06222222	27.02777778	26.72111111	26.76888889	26.74	26.88444444	27.09333333	26.51666667	26.41555556	26.33	26.32	25.59888889	26.14666667	26.13888889	26.27222222
8/11/2019 11:59:20	-118.5141051	42.54334796	1239.529613	-118.5140916	42.54333867	1234.346445	-118.5140862	42.54334394	1235.300871	8/11/2019 12:00:19	29.39555556	29.25555556	29.49666667	29.54888889	29.54333333	29.51111111	29.56888889	29.35555556	29.34444444	29.55	29.86111111	29.61555556	29.62444444	29.68	29.46222222	29.48333333	29.34	29.42777778	29.21666667	29.24333333	29.12111111	29.10666667	29.08777778	29.02777778	29.09111111	28.93777778	28.65666667	28.73222222	28.67666667	28.64888889	28.87777778	28.37666667	28.39	28.32444444	28.11222222	27.31777778	27.88	27.98555556	28.04555556
8/11/2019 11:59:21	-118.5140769	42.54333864	1239.589419	-118.5140635	42.54332924	1234.386039	-118.5140484	42.54333131	1235.523032	8/11/2019 12:00:20	30.03777778	30.1	29.89777778	30.16111111	30.00333333	30.11888889	29.95777778	29.75444444	29.87888889	30.05444444	30.43333333	30.22	30.12666667	30.14333333	29.95777778	30.08333333	29.86111111	29.91222222	29.92666667	29.68555556	29.57444444	29.63111111	29.70888889	29.50777778	29.63666667	29.45222222	29.21333333	29.19111111	29.17333333	29.23	29.23444444	28.83666667	28.76222222	28.70222222	28.57777778	27.88444444	28.33111111	28.56888889	28.24555556
8/11/2019 11:59:22	-118.514048	42.54332929	1239.614355	-118.5140343	42.54331963	1234.385365	-118.5140332	42.5433211	1235.512548	8/11/2019 12:00:21	29.33888889	29.04111111	29.16	29.34333333	29.25666667	29.13222222	29.27888889	28.94333333	29.02111111	29.15333333	29.48222222	29.32444444	29.43111111	29.27666667	29.18444444	29.25555556	29.10222222	29.18444444	29.03888889	29.00555556	28.75666667	28.90111111	28.78	28.79888889	28.8	28.60333333	28.41777778	28.34222222	28.37	28.42888889	28.60444444	27.94888889	28.07555556	27.83444444	27.66555556	26.91666667	27.70111111	27.61111111	27.65
8/11/2019 11:59:23	-118.5140165	42.54331886	1239.6176	-118.5140029	42.5433091	1234.35648	-118.5140131	42.54331202	1235.3328	8/11/2019 12:00:22	25.937	25.659	25.775	26.041	25.844	25.732	25.851	25.45	25.494	25.677	26.093	25.737	25.831	25.835	25.678	25.723	25.531	25.597	25.44	25.411	25.304	25.324	25.436	25.4	25.441	25.289	25.075	25.129	25.062	25.235	25.328	24.891	24.818	24.465	24.646	23.733	24.447	24.241	24.693
8/11/2019 11:59:24	-118.513981	42.54330652	1239.58971	-118.5139677	42.54329684	1234.312552	-118.5139756	42.54329882	1235.218839	8/11/2019 12:00:23	23.56333333	23.44333333	23.58111111	23.69222222	23.74777778	23.51	23.60222222	23.27666667	23.35555556	23.51	23.84111111	23.64444444	23.71666667	23.62555556	23.48888889	23.56333333	23.50111111	23.60555556	23.39	23.20444444	23.24555556	23.28222222	23.38222222	23.28666667	23.29555556	23.33222222	23.06111111	23.02555556	23.13777778	23.16555556	23.39222222	22.78222222	22.79666667	22.69	22.37	21.85444444	22.45	22.45666667	22.51
8/11/2019 11:59:25	-118.513944	42.54329322	1239.566774	-118.5139304	42.54328346	1234.284461	-118.5139362	42.54328496	1235.157419	8/11/2019 12:00:24	23.25666667	23.14888889	23.15222222	23.47444444	23.28555556	23.33222222	23.44777778	23.02888889	23.18666667	23.27222222	23.55444444	23.39111111	23.42333333	23.45555556	23.20666667	23.27555556	23.23	23.26777778	23.16	22.96666667	23.05444444	23.02333333	23.14444444	23.10777778	23.08888889	22.94444444	22.76555556	22.85444444	22.82444444	22.88444444	23.12333333	22.52666667	22.51444444	22.35	22.35777778	21.55	22.16666667	22.09333333	22.13555556
8/11/2019 11:59:26	-118.5139064	42.54328024	1239.4878	-118.5138933	42.54327062	1234.23388	-118.5138992	42.54327314	1235.0756	8/11/2019 12:00:25	22.08444444	21.92555556	21.78666667	21.94	22.13666667	21.90111111	21.97444444	21.62777778	21.74222222	21.89111111	22.21777778	21.95888889	21.96555556	22.02111111	21.83777778	21.99	21.78666667	21.88555556	21.83	21.71222222	21.70444444	21.55555556	21.79	21.69444444	21.74	21.76777778	21.45	21.53777778	21.48666667	21.47444444	21.79777778	21.23	21.11888889	21.02555556	20.97	20.1	20.99	20.75111111	21.00333333
8/11/2019 11:59:27	-118.5138707	42.54326779	1239.474871	-118.5138593	42.54325887	1234.215013	-118.5138568	42.54325894	1235.147484	8/11/2019 12:00:26	17.95888889	17.94222222	17.8	18.12111111	17.98333333	17.84222222	17.97666667	17.57222222	17.62	17.77222222	18.19333333	17.86333333	17.86777778	17.92444444	17.76111111	17.88555556	17.69666667	17.78222222	17.74555556	17.61666667	17.63333333	17.55444444	17.69555556	17.62	17.56222222	17.6	17.27777778	17.41111111	17.39333333	17.47555556	17.66444444	17.10444444	17.13555556	17.21222222	17.29333333	16.43888889	17.25	17.00222222	17.12111111
8/11/2019 11:59:28	-118.5138372	42.54325651	1239.517677	-118.513824	42.54324706	1234.236103	-118.5138047	42.54324235	1235.444806	8/11/2019 12:00:27	18.73888889	18.63	18.56222222	18.94888889	18.89111111	18.77444444	18.70666667	18.51111111	18.46777778	18.55888889	19.06444444	18.67666667	18.79222222	18.8	18.54222222	18.73444444	18.54888889	18.65666667	18.65888889	18.50333333	18.44555556	18.35222222	18.56888889	18.46	18.41666667	18.46444444	18.25444444	18.31333333	18.21333333	18.32333333	18.62444444	17.88666667	17.93777778	17.71555556	17.86888889	17.31333333	17.90888889	17.77888889	17.83888889
8/11/2019 11:59:29	-118.5138066	42.5432457	1239.562032	-118.5137931	42.5432361	1234.270313	-118.5137882	42.54323244	1235.563516	8/11/2019 12:00:28	19.20111111	18.99666667	18.90444444	19.32111111	19.05888889	19.07444444	19.17777778	18.79111111	18.95111111	19.07666667	19.42	19.13222222	19.23222222	19.22444444	19.04888889	19.10111111	19.00333333	19.02333333	19.04666667	18.81	18.88	18.84333333	18.89111111	18.76555556	18.96888889	18.90555556	18.69111111	18.70111111	18.70666667	18.78	19.04777778	18.35888889	18.3	18.28333333	18.34888889	17.58333333	18.21333333	18.18222222	18.39222222
8/11/2019 11:59:30	-118.5137781	42.54323606	1239.582355	-118.5137647	42.54322663	1234.286458	-118.5137759	42.54322636	1235.43571	8/11/2019 12:00:29	19.48333333	19.29777778	19.34111111	19.56777778	19.67333333	19.48666667	19.56666667	19.11888889	19.29	19.36777778	19.76888889	19.43777778	19.58333333	19.62555556	19.40666667	19.45333333	19.42666667	19.39333333	19.37888889	19.12333333	19.27111111	19.2	19.32888889	19.19	19.22111111	19.31555556	19.09111111	19.04888889	19.03	19.13111111	19.29333333	18.88777778	18.69888889	18.80222222	18.81888889	18.00333333	18.64111111	18.51555556	18.58777778
8/11/2019 11:59:31	-118.5137519	42.54322676	1239.6382	-118.5137385	42.54321752	1234.30016	-118.5137489	42.54321864	1235.3112	8/11/2019 12:00:30	17.95333333	17.99111111	17.91555556	18.27666667	18.03666667	18.00111111	18.04666667	17.70777778	17.79777778	17.90888889	18.28888889	18.01888889	18.03666667	18.1	17.84666667	17.93444444	17.83888889	17.96	17.89333333	17.65555556	17.66777778	17.67666667	17.82111111	17.73444444	17.74555556	17.76777778	17.49222222	17.49777778	17.55333333	17.67888889	17.88888889	17.24888889	17.33888889	17.36777778	17.40444444	16.38	17.36	16.95	17.27666667
8/11/2019 11:59:32	-118.513726	42.54321752	1239.659806	-118.5137138	42.54320872	1234.290416	-118.513716	42.54320905	1235.337839	8/11/2019 12:00:31	18.23	18.183	18.028	18.364	18.203	18.155	18.15	17.73	17.975	17.963	18.276	18.073	18.087	18.158	18.081	18.06	17.949	18.018	17.974	17.773	17.838	17.773	17.974	17.781	17.906	17.832	17.527	17.647	17.671	17.708	17.965	17.296	17.334	17.204	17.606	16.366	17.163	17.278	17.164
8/11/2019 11:59:33	-118.5137003	42.54320812	1239.695097	-118.5136871	42.54319901	1234.283926	-118.5136845	42.54319892	1235.384484	8/11/2019 12:00:32	17.95333333	17.88444444	17.74666667	18.11666667	17.95555556	17.81444444	17.88666667	17.51222222	17.68444444	17.75555556	18.20222222	17.89222222	17.83555556	17.91555556	17.69111111	17.90333333	17.70666667	17.78888889	17.85888889	17.55333333	17.57111111	17.57888889	17.66222222	17.65333333	17.63333333	17.67222222	17.38888889	17.41444444	17.35333333	17.50555556	17.75555556	17.05666667	17.06888889	17.28111111	17.24	16.30666667	17.13333333	16.90888889	17.09
8/11/2019 11:59:34	-118.5136776	42.54319952	1239.6528	-118.5136648	42.54319058	1234.23452	-118.5136627	42.54319168	1235.2984	8/11/2019 12:00:33	17.71111111	17.44555556	17.34	17.81777778	17.74222222	17.56555556	17.62888889	17.30111111	17.33777778	17.40111111	17.65666667	17.55888889	17.61111111	17.70111111	17.48888889	17.65333333	17.51111111	17.48888889	17.43222222	17.30444444	17.31111111	17.25222222	17.39111111	17.28444444	17.22666667	17.30777778	17.08888889	17.13555556	17.08333333	17.10444444	17.40555556	16.90888889	16.70777778	16.87777778	16.80555556	16.16777778	16.74444444	16.55888889	16.79666667
8/11/2019 11:59:35	-118.5136674	42.54319559	1239.562581	-118.5136547	42.54318669	1234.198229	-118.5136529	42.54318882	1235.213871	8/11/2019 12:00:34	18.09555556	17.60666667	17.85222222	18.13444444	18.08666667	17.78888889	17.79555556	17.39777778	17.56111111	17.66444444	18.15666667	17.89555556	17.81555556	17.82222222	17.64444444	17.81111111	17.64222222	17.72333333	17.61666667	17.52222222	17.47111111	17.45444444	17.58666667	17.50555556	17.56777778	17.50444444	17.33	17.33444444	17.38333333	17.36666667	17.66444444	17.06	16.94222222	16.8	17.21666667	16.31555556	16.85111111	16.90333333	16.80888889
8/11/2019 11:59:36	-118.5136662	42.54319768	1239.60032	-118.5136532	42.54318833	1234.285624	-118.5136513	42.54319056	1235.2556	8/11/2019 12:00:35	17.94	17.95555556	17.92666667	18.03555556	18.00777778	17.85333333	17.88	17.61	17.81333333	17.83222222	18.12111111	17.85333333	17.99444444	17.94888889	17.78111111	17.77666667	17.70666667	17.86	17.73	17.58222222	17.52111111	17.61444444	17.66666667	17.63444444	17.69333333	17.57666667	17.41777778	17.51	17.48	17.50777778	17.75777778	17.13888889	17.16333333	17.25444444	17.33666667	16.30888889	17.15777778	16.96666667	17.08333333
8/11/2019 11:59:37	-118.5136639	42.54320423	1239.614811	-118.5136509	42.54319468	1234.358422	-118.5136482	42.54319715	1235.350919	8/11/2019 12:00:36	18.84555556	18.53333333	18.74111111	18.89222222	18.69888889	18.61777778	18.71555556	18.42	18.49333333	18.53	18.92666667	18.63888889	18.67444444	18.78777778	18.67444444	18.73777778	18.61222222	18.67444444	18.59222222	18.40666667	18.32888889	18.47888889	18.57444444	18.41444444	18.46888889	18.41666667	18.27888889	18.33	18.29333333	18.38	18.62	18.01222222	17.90111111	18.03777778	18.01333333	17.19333333	17.84777778	17.82	17.79666667
8/11/2019 11:59:38	-118.5136614	42.54321501	1239.603387	-118.5136483	42.54320529	1234.431687	-118.5136468	42.54320909	1235.435097	8/11/2019 12:00:37	18.83	18.66555556	18.63666667	18.96333333	18.83666667	18.63666667	18.76777778	18.34777778	18.49888889	18.60777778	19.07111111	18.73777778	18.75444444	18.77888889	18.64111111	18.67888889	18.60222222	18.70666667	18.63888889	18.40444444	18.45888889	18.36888889	18.55888889	18.53444444	18.54333333	18.52444444	18.20888889	18.33888889	18.29333333	18.47444444	18.71111111	18.06333333	17.91444444	17.99777778	18.12333333	17.25111111	18.01777778	17.71333333	17.75666667
8/11/2019 11:59:39	-118.5136588	42.54322442	1239.5794	-118.5136457	42.54321472	1234.46044	-118.5136471	42.5432199	1235.3388	8/11/2019 12:00:38	18.37222222	18.29444444	18.31666667	18.54333333	18.40111111	18.26	18.33	17.94444444	18.20555556	18.22333333	18.56222222	18.30222222	18.31777778	18.39555556	18.31	18.28666667	18.10666667	18.21333333	18.24666667	18.02777778	18.09777778	18.03666667	18.08777778	18.05888889	18.12222222	18.07777778	17.92222222	17.91888889	17.86333333	17.93	18.28555556	17.80333333	17.54	17.46888889	17.64555556	16.86444444	17.59777778	17.32333333	17.53666667
8/11/2019 11:59:40	-118.5136549	42.54323332	1239.54671	-118.513642	42.54322364	1234.444668	-118.5136387	42.5432245	1235.166871	8/11/2019 12:00:39	17.90888889	18.10444444	17.84666667	18.02555556	18.05888889	17.90888889	17.86888889	17.54	17.74111111	17.85	18.17	17.91111111	17.97111111	18.00777778	17.81333333	17.88888889	17.79777778	17.81777778	17.67777778	17.62777778	17.61777778	17.68555556	17.75555556	17.67666667	17.66444444	17.69333333	17.41222222	17.40666667	17.32333333	17.60777778	17.79888889	17.27444444	17.21888889	16.93222222	17.40444444	16.24111111	17.26888889	16.90333333	17.09555556
8/11/2019 11:59:41	-118.5136491	42.54324334	1239.461194	-118.5136366	42.54323377	1234.394874	-118.5136191	42.54322656	1234.961452	8/11/2019 12:00:40	17.499	17.357	17.347	17.576	17.57	17.296	17.383	17.061	17.149	17.247	17.532	17.391	17.356	17.417	17.279	17.391	17.33	17.254	17.163	16.976	16.999	16.973	17.001	17.028	17.011	17.09	16.847	16.882	16.78	16.88	17.169	16.755	16.497	16.568	16.675	15.819	16.488	16.321	16.65
8/11/2019 11:59:42	-118.5136435	42.54325284	1239.421161	-118.5136312	42.54324351	1234.386203	-118.5136189	42.54324747	1234.914871	8/11/2019 12:00:41	17.65444444	17.55777778	17.3	17.79222222	17.51222222	17.46222222	17.43666667	17.09777778	17.15777778	17.34666667	17.70333333	17.38666667	17.42777778	17.40666667	17.33111111	17.42222222	17.28666667	17.29888889	17.22	17.04888889	17.10555556	17.06222222	17.21444444	17.07111111	17.06888889	17.10666667	16.90666667	16.94111111	16.90666667	16.87888889	17.23333333	16.63555556	16.56888889	16.52555556	16.71	16.05333333	16.94555556	16.45222222	16.52111111
8/11/2019 11:59:43	-118.5136409	42.54325682	1239.434	-118.5136288	42.5432478	1234.40652	-118.513628	42.54325784	1235.038	8/11/2019 12:00:42	17.02333333	16.98666667	16.85222222	17.05444444	17.08666667	16.93555556	16.97	16.59555556	16.75111111	16.84333333	17.18777778	16.87777778	16.95777778	16.97444444	16.72222222	16.84444444	16.63333333	16.76555556	16.69888889	16.49888889	16.52	16.42555556	16.58777778	16.50333333	16.57333333	16.50111111	16.33777778	16.30666667	16.34	16.41444444	16.66666667	16.01666667	16.05	15.95444444	16.19444444	15.37222222	16.03333333	15.91555556	16.10333333
8/11/2019 11:59:44	-118.5136431	42.54325441	1239.419097	-118.5136313	42.54324561	1234.378777	-118.5136371	42.54325852	1235.148097	8/11/2019 12:00:43	17.32777778	17.09777778	17.16111111	17.44555556	17.32	17.33888889	17.28333333	16.89444444	16.94111111	17.14222222	17.50333333	17.15333333	17.18	17.35666667	17.12666667	17.24555556	17.02555556	17.09555556	17.02222222	16.85333333	16.83111111	16.82888889	16.97	16.81222222	16.92555556	16.94777778	16.74111111	16.74	16.69666667	16.77	16.98777778	16.40111111	16.32888889	16.24555556	16.64222222	15.66666667	16.51	16.11333333	16.40666667
8/11/2019 11:59:45	-118.5136477	42.54324896	1239.410871	-118.513636	42.54324026	1234.379968	-118.5136499	42.5432544	1235.250387	8/11/2019 12:00:44	18.09222222	17.83666667	17.92222222	18.31888889	18.04	18.01	18.01333333	17.60777778	17.81666667	17.86	18.24555556	17.88888889	18.05333333	18.05111111	17.91222222	17.99666667	17.90222222	17.83111111	17.89888889	17.64888889	17.72111111	17.75333333	17.77444444	17.78444444	17.72666667	17.71888889	17.42333333	17.57222222	17.50333333	17.65444444	17.75444444	17.26888889	17.26555556	17.31666667	17.23222222	16.49444444	17.18222222	16.89666667	17.21666667
8/11/2019 11:59:46	-118.5136531	42.54324181	1239.432387	-118.5136413	42.54323322	1234.40191	-118.5136625	42.54324743	1235.319129	8/11/2019 12:00:45	18.42666667	18.16888889	18.28333333	18.51666667	18.41	18.16222222	18.30777778	18.00555556	18.06	18.15555556	18.49333333	18.28111111	18.24777778	18.31666667	18.13222222	18.26555556	18.10333333	18.19555556	18.12111111	17.93555556	17.89888889	17.95666667	18.15666667	17.97444444	18.06	18.03444444	17.82444444	17.80333333	17.75333333	17.89111111	18.16777778	17.68222222	17.55555556	17.59666667	17.64444444	16.78888889	17.68444444	17.28444444	17.49
8/11/2019 11:59:47	-118.5136576	42.54323405	1239.467968	-118.5136456	42.54322548	1234.391461	-118.5136656	42.54323945	1235.416613	8/11/2019 12:00:46	18.52666667	18.56	18.52	18.80222222	18.75111111	18.49888889	18.58333333	18.21111111	18.43888889	18.50111111	18.82777778	18.61666667	18.69333333	18.59	18.50666667	18.64444444	18.54222222	18.52777778	18.48666667	18.32777778	18.28333333	18.31222222	18.43111111	18.38555556	18.39666667	18.42222222	18.17444444	18.14444444	18.18333333	18.21555556	18.52444444	17.93888889	18.02	17.82888889	17.79777778	17.05222222	17.98777778	17.61	17.82333333
8/11/2019 11:59:48	-118.5136607	42.54322934	1239.5468	-118.5136484	42.54322076	1234.432577	-118.5136668	42.54323426	1235.517267	8/11/2019 12:00:47	18.38111111	18.32666667	18.28777778	18.52333333	18.52666667	18.37	18.38222222	18.02444444	18.17	18.24333333	18.61333333	18.34333333	18.38111111	18.50666667	18.22666667	18.34777778	18.25111111	18.31777778	18.26333333	18.02777778	18.07555556	18.05444444	18.17222222	18.05888889	18.15	18.19	17.83222222	17.87222222	17.77666667	17.97666667	18.22666667	17.75888889	17.66666667	17.35333333	17.57555556	16.77444444	17.59666667	17.34555556	17.81
8/11/2019 11:59:49	-118.5136605	42.54322854	1239.532903	-118.513648	42.54321995	1234.398016	-118.5136602	42.54322779	1235.447677	8/11/2019 12:00:48	18.19111111	18.13666667	18.12555556	18.49444444	18.22	18.1	18.18222222	17.92555556	17.99333333	18.13555556	18.53111111	18.21444444	18.22111111	18.21888889	18.06111111	18.26333333	18.05444444	18.12777778	18.05111111	17.88111111	17.98222222	17.87555556	18.04222222	17.86777778	18.02555556	17.99666667	17.79666667	17.77555556	17.76666667	17.83777778	18.06333333	17.58666667	17.51888889	17.49222222	17.44666667	16.62777778	17.40888889	17.11888889	17.22333333
8/11/2019 11:59:50	-118.5136591	42.54322909	1239.386161	-118.5136466	42.54322066	1234.234284	-118.5136561	42.5432253	1235.32571	8/11/2019 12:00:49	18.269	18.405	18.319	18.527	18.416	18.276	18.416	17.972	18.116	18.192	18.593	18.303	18.386	18.35	18.247	18.371	18.212	18.319	18.262	18.046	18.062	18.01	18.159	18.091	18.139	18.071	17.802	17.895	17.923	18.036	18.306	17.635	17.628	17.822	17.741	16.608	17.552	17.41	17.59
8/11/2019 11:59:51	-118.5136557	42.54323454	1239.145774	-118.5136432	42.54322617	1233.994013	-118.5136513	42.54322878	1235.071387	8/11/2019 12:00:50	18.29	18.10555556	18.09777778	18.42555556	18.28	18.16888889	18.16333333	17.80333333	17.99333333	18.05888889	18.36555556	18.19333333	18.19333333	18.21666667	18.11111111	18.16777778	18.08666667	18.08777778	18.03333333	17.95333333	17.88111111	17.86222222	18.04333333	17.91666667	17.99	17.91888889	17.80222222	17.83666667	17.75333333	17.78777778	18.02888889	17.66777778	17.60111111	17.52555556	17.53222222	16.56888889	17.34444444	17.25444444	17.62333333
8/11/2019 11:59:52	-118.5136485	42.54324576	1238.9136	-118.5136361	42.5432374	1233.79562	-118.5136443	42.54323948	1234.8682	8/11/2019 12:00:51	17.22333333	17.14333333	17.09666667	17.32222222	17.28111111	16.98666667	17.12333333	16.82222222	16.85555556	16.87111111	17.26333333	16.96	17.01444444	17.09555556	16.85333333	16.99888889	16.85111111	16.86444444	16.85888889	16.61666667	16.70888889	16.62111111	16.73555556	16.67444444	16.63333333	16.60888889	16.39111111	16.57222222	16.46333333	16.47444444	16.72	16.24111111	16.19555556	16.23111111	16.26222222	15.46333333	16.20444444	16.01111111	16.25111111
8/11/2019 11:59:53	-118.5136389	42.54326071	1238.496516	-118.5136268	42.5432517	1233.437616	-118.5136352	42.54325385	1234.535	8/11/2019 12:00:52	18.05777778	18.11222222	17.99888889	18.35777778	18.21222222	18.05111111	18.11444444	17.78222222	17.84222222	17.86555556	18.30111111	18.08333333	18.02888889	18.13	17.89888889	18.05111111	17.91111111	17.87555556	17.93111111	17.66444444	17.67888889	17.73444444	17.80888889	17.69888889	17.68777778	17.78555556	17.50888889	17.58666667	17.50333333	17.66888889	17.89777778	17.26333333	17.24222222	17.05666667	17.19777778	16.50333333	17.32222222	17.1	17.06666667
8/11/2019 11:59:54	-118.5136281	42.54327722	1237.825258	-118.5136156	42.54326869	1232.750568	-118.5136243	42.54327112	1233.848516	8/11/2019 12:00:53	19.68222222	19.60111111	19.49666667	19.74444444	19.65444444	19.58888889	19.56333333	19.22555556	19.29111111	19.33777778	19.74333333	19.46444444	19.59777778	19.57111111	19.33222222	19.50555556	19.43666667	19.32555556	19.35666667	19.14333333	19.09777778	19.19555556	19.24222222	19.11444444	19.31222222	19.18111111	18.98111111	18.95555556	18.99666667	19.09555556	19.26555556	18.77777778	18.85333333	18.69555556	18.82	17.80444444	18.65666667	18.51888889	18.53555556
8/11/2019 11:59:55	-118.5136193	42.54329083	1237.611065	-118.5136067	42.5432823	1232.596203	-118.5136154	42.54328514	1233.591452	8/11/2019 12:00:54	19.03777778	18.93	18.90333333	19.27	19.15333333	18.97	18.91222222	18.55444444	18.77888889	18.83222222	19.20111111	18.94222222	18.95555556	19.02333333	18.76333333	18.87444444	18.74777778	18.79	18.82222222	18.58333333	18.69777778	18.53777778	18.69888889	18.64111111	18.75222222	18.61222222	18.39555556	18.50777778	18.51333333	18.50111111	18.83666667	18.25	18.20777778	18.22	18.56333333	17.50333333	18.08	18.03444444	17.99
8/11/2019 11:59:56	-118.5136175	42.54329418	1237.5884	-118.5136049	42.54328595	1232.55474	-118.5136129	42.54328736	1233.5624	8/11/2019 12:00:55	17.98444444	17.95333333	17.95666667	18.12666667	18.12777778	18.02555556	18.07111111	17.66222222	17.69444444	17.91777778	18.25111111	18.01111111	18.00222222	18.06	17.87222222	18.01222222	17.88222222	17.88888889	17.86777778	17.6	17.61888889	17.61555556	17.72	17.65	17.74	17.77666667	17.44888889	17.54111111	17.40666667	17.67444444	17.81444444	17.31888889	17.32666667	17.27444444	17.59222222	16.52	17.51111111	17.15444444	17.43666667
8/11/2019 11:59:57	-118.5136181	42.54329365	1237.530419	-118.5136058	42.54328566	1232.495781	-118.5136124	42.54328672	1233.522323	8/11/2019 12:00:56	19.40666667	19.44888889	19.20666667	19.62	19.42333333	19.32777778	19.41444444	18.93666667	19.13555556	19.32555556	19.62	19.28666667	19.33444444	19.44	19.14111111	19.32	19.14	19.26555556	19.24444444	18.96222222	18.96111111	18.96	19.11	19.02111111	19.04444444	19.04444444	18.76666667	18.88666667	18.79333333	18.89333333	19.13777778	18.64666667	18.47888889	18.41555556	18.42555556	17.78222222	18.41333333	18.38222222	18.46888889
8/11/2019 11:59:58	-118.5136218	42.54329098	1237.582194	-118.5136093	42.54328309	1232.48531	-118.5136165	42.54328432	1233.496161	8/11/2019 12:00:57	18.38888889	18.46555556	18.37	18.73555556	18.65777778	18.48888889	18.45777778	18.02333333	18.21888889	18.34	18.64	18.47777778	18.43111111	18.48888889	18.35888889	18.44444444	18.34555556	18.37777778	18.28888889	18.13888889	18.05777778	18.13777778	18.30555556	18.14444444	18.12666667	18.14333333	17.85222222	17.89111111	18.00333333	17.97	18.23777778	17.70222222	17.67111111	17.69444444	17.82333333	16.91222222	17.55888889	17.47	17.73666667
8/11/2019 11:59:59	-118.5136286	42.54328403	1237.819516	-118.5136154	42.54327624	1232.650745	-118.5136366	42.54327319	1233.88429	8/11/2019 12:00:58	18.623	18.53	18.462	18.709	18.727	18.546	18.576	18.182	18.388	18.513	18.773	18.467	18.565	18.584	18.463	18.604	18.373	18.469	18.446	18.206	18.161	18.191	18.186	18.206	18.214	18.221	18.102	17.973	18.007	18.152	18.322	17.918	17.855	17.84	17.824	17.116	17.798	17.519	17.68
8/11/2019 12:00:00	-118.5136351	42.54327628	1238.223613	-118.5136215	42.5432685	1233.054897	-118.5136491	42.54326625	1234.716419	8/11/2019 12:00:59	17.82111111	17.62666667	17.60888889	17.83444444	17.88888889	17.67444444	17.70111111	17.40444444	17.49777778	17.56444444	17.84222222	17.62333333	17.62888889	17.74333333	17.43222222	17.63111111	17.53777778	17.49222222	17.49	17.24555556	17.37555556	17.37555556	17.43111111	17.33111111	17.33	17.43555556	17.15	17.15444444	17.16333333	17.14888889	17.47333333	16.81888889	16.79777778	17.03555556	17.15666667	16.16	16.79888889	16.66444444	16.92888889
8/11/2019 12:00:01	-118.513641	42.54326834	1238.3978	-118.5136271	42.54326084	1233.20086	-118.513654	42.54325838	1235.0604	8/11/2019 12:01:00	17.25333333	17.21222222	17.13222222	17.47777778	17.29555556	17.13777778	17.10777778	16.73222222	16.88	17.00444444	17.34333333	17.01888889	17.03333333	17.12777778	16.89777778	17.06	16.92888889	16.89222222	16.77888889	16.62	16.68555556	16.69555556	16.83333333	16.74777778	16.73555556	16.67222222	16.44444444	16.42444444	16.53333333	16.46111111	16.82444444	16.26555556	16.15222222	16.29555556	16.53888889	15.65111111	16.31333333	16.01555556	16.12222222
8/11/2019 12:00:02	-118.5136472	42.54326003	1238.562516	-118.5136332	42.5432528	1233.355655	-118.5136577	42.54325308	1235.360516	8/11/2019 12:01:01	17.60222222	17.54555556	17.44	17.75444444	17.64777778	17.40777778	17.48222222	17.09888889	17.32888889	17.39222222	17.68777778	17.49555556	17.51111111	17.56666667	17.26888889	17.43666667	17.28333333	17.31666667	17.32444444	17.08111111	17.07111111	17.07555556	17.19222222	17.12444444	17.1	17.21777778	16.89	16.98555556	16.93	17.03333333	17.24	16.63111111	16.66111111	16.72222222	16.67666667	15.84777778	16.63222222	16.45333333	16.64222222
8/11/2019 12:00:03	-118.5136539	42.5432511	1238.580161	-118.5136395	42.5432445	1233.348258	-118.5136694	42.54324797	1235.292645	8/11/2019 12:01:02	18.51555556	18.46555556	18.24	18.70333333	18.52	18.40222222	18.52444444	18.17888889	18.23	18.35444444	18.71	18.42888889	18.43222222	18.45666667	18.34222222	18.44555556	18.29666667	18.39222222	18.38555556	18.07666667	18.14333333	18.09888889	18.16	18.08666667	18.14888889	18.14333333	17.89888889	18.07	17.87666667	17.94333333	18.21222222	17.73111111	17.86444444	17.81444444	17.79666667	16.85555556	17.78333333	17.38111111	17.57666667
8/11/2019 12:00:04	-118.5136607	42.54324187	1238.613484	-118.5136464	42.54323516	1233.337461	-118.5136807	42.54324288	1235.331387	8/11/2019 12:01:03	19.15666667	19.13555556	19.16	19.42555556	19.36222222	19.15888889	19.21444444	18.83777778	19.04888889	19.25111111	19.47777778	19.23666667	19.22333333	19.35	19.16333333	19.24111111	19.13777778	19.21	19.21888889	18.88111111	18.94444444	19	19.12777778	18.98222222	18.99111111	19.05666667	18.78222222	18.81777778	18.81	18.85666667	19.16555556	18.63555556	18.57222222	18.63222222	18.53555556	17.77333333	18.62555556	18.24	18.52666667
8/11/2019 12:00:05	-118.5136677	42.5432319	1238.7362	-118.5136534	42.54322536	1233.4122	-118.513688	42.54323682	1235.427	8/11/2019 12:01:04	18.87	18.92666667	18.66666667	19.03777778	18.87888889	18.8	19.01444444	18.45111111	18.66888889	18.74333333	19.16666667	18.90333333	18.95888889	18.97222222	18.85555556	18.93666667	18.83666667	18.80888889	18.82222222	18.56777778	18.57555556	18.59555556	18.72222222	18.55444444	18.71333333	18.72444444	18.52888889	18.49222222	18.48333333	18.65888889	18.86555556	18.19666667	18.18444444	18.24888889	18.20888889	17.40444444	18.26777778	18.03555556	18.23333333
8/11/2019 12:00:06	-118.5136743	42.54322232	1239.175677	-118.5136595	42.54321619	1233.821255	-118.5136916	42.54322968	1235.870065	8/11/2019 12:01:05	18.67111111	18.72222222	18.84666667	19.01777778	18.73333333	18.71111111	18.80333333	18.47111111	18.48666667	18.69555556	19.01333333	18.74	18.80222222	18.89444444	18.71666667	18.85555556	18.65555556	18.70333333	18.62555556	18.44444444	18.50777778	18.50666667	18.58444444	18.48111111	18.61888889	18.60666667	18.35444444	18.21111111	18.36	18.44111111	18.66777778	18.16444444	18.05888889	18.00222222	18.04	17.24222222	18.01111111	17.71555556	18.07
8/11/2019 12:00:07	-118.5136812	42.543213	1239.243387	-118.5136669	42.54320647	1233.899987	-118.5136937	42.54321916	1235.980548	8/11/2019 12:01:06	18.32666667	18.25777778	18.11888889	18.39	18.41777778	18.29333333	18.23111111	17.88777778	18.03222222	18.18555556	18.48666667	18.25222222	18.29333333	18.34222222	18.19666667	18.22333333	18.16111111	18.19111111	18.21333333	17.91	17.99666667	18.03	18.14	18.00222222	18.05666667	18.00333333	17.83222222	17.83555556	17.87	17.97444444	18.10111111	17.67	17.60444444	17.43777778	17.67222222	16.91111111	17.61111111	17.37	17.39
8/11/2019 12:00:08	-118.5136894	42.54320566	1239.278065	-118.513675	42.54319969	1233.904761	-118.5136809	42.54320551	1235.43571	8/11/2019 12:01:07	18.17111111	18.18666667	18.17777778	18.52111111	18.37222222	18.12555556	18.26333333	17.98111111	18.06666667	18.18222222	18.52222222	18.19	18.28444444	18.29777778	18.16444444	18.20888889	18.15666667	18.14555556	18.14444444	17.91333333	17.91222222	17.88333333	18.03333333	18.00111111	17.98111111	18.04111111	17.79111111	17.79333333	17.81	17.96111111	18.12	17.55444444	17.43444444	17.61111111	17.77222222	16.86444444	17.48777778	17.28777778	17.51
8/11/2019 12:00:09	-118.5136954	42.54320394	1239.190645	-118.5136823	42.54319776	1233.875977	-118.5136645	42.54320147	1234.689903	8/11/2019 12:01:08	18.574	18.485	18.493	18.704	18.716	18.506	18.458	18.042	18.391	18.409	18.744	18.559	18.509	18.569	18.351	18.491	18.386	18.386	18.378	18.238	18.203	18.189	18.35	18.269	18.22	18.232	18.069	18.017	17.989	18.19	18.32	17.911	17.676	17.853	17.747	17.059	17.594	17.583	17.65
8/11/2019 12:00:10	-118.5137073	42.54320642	1239.187	-118.5136945	42.54320047	1233.90688	-118.5136676	42.54319608	1234.2266	8/11/2019 12:01:09	17.81444444	17.72333333	17.75222222	18.06333333	17.84222222	17.72888889	17.84333333	17.33888889	17.49888889	17.55222222	17.98555556	17.69666667	17.70888889	17.77222222	17.60111111	17.67222222	17.60444444	17.65888889	17.59	17.44111111	17.42222222	17.38111111	17.49111111	17.44555556	17.52555556	17.44111111	17.31333333	17.24222222	17.21666667	17.36555556	17.57	17.02666667	17.05555556	16.91111111	17.03444444	16.25111111	17.17555556	16.73333333	16.80222222
8/11/2019 12:00:11	-118.5137261	42.54321188	1239.219742	-118.5137129	42.54320588	1233.931513	-118.5136892	42.54320082	1233.868226	8/11/2019 12:01:10	18.01	17.80222222	17.65444444	18.14888889	18.02	17.86111111	17.92222222	17.50555556	17.69777778	17.74777778	18.09666667	17.80444444	17.88888889	17.95333333	17.81111111	17.92666667	17.72444444	17.72777778	17.71777778	17.46888889	17.63111111	17.50222222	17.70111111	17.60555556	17.62555556	17.64111111	17.30333333	17.37	17.38666667	17.50777778	17.67888889	17.13	17.10333333	17.17111111	17.01111111	16.32111111	17.18777778	16.81555556	16.90333333
8/11/2019 12:00:12	-118.5137496	42.54321966	1239.255452	-118.5137374	42.54321387	1233.971145	-118.5137267	42.5432169	1233.524032	8/11/2019 12:01:11	19.33777778	19.10777778	19.19555556	19.50444444	19.44222222	19.39222222	19.34888889	19.10777778	19.29666667	19.31888889	19.72	19.30333333	19.35	19.47666667	19.28555556	19.44777778	19.30555556	19.32555556	19.25777778	19.10555556	19.14111111	19.10666667	19.25444444	19.14111111	19.17444444	19.19444444	19.00444444	19.01222222	19	19.14444444	19.38222222	18.75444444	18.7	18.40888889	18.57	17.74777778	18.66444444	18.35222222	18.49444444
8/11/2019 12:00:13	-118.5137765	42.54322893	1239.313742	-118.5137643	42.54322303	1234.046087	-118.5137636	42.54322994	1233.327323	8/11/2019 12:01:12	18.84	18.88111111	18.82777778	19.00666667	18.98888889	18.79333333	18.87555556	18.60111111	18.76666667	18.88222222	19.21888889	18.87222222	18.90666667	18.97222222	18.75666667	18.90666667	18.71666667	18.79111111	18.82111111	18.56777778	18.61222222	18.55222222	18.76	18.65555556	18.66	18.62666667	18.38444444	18.39888889	18.43	18.54111111	18.75222222	18.24888889	18.13777778	18.04555556	18.27	17.61111111	18.12	17.92555556	18.14444444
8/11/2019 12:00:14	-118.5138043	42.54323877	1239.324742	-118.5137924	42.54323298	1234.094152	-118.5138034	42.54323717	1233.297032	8/11/2019 12:01:13	17.64111111	17.55222222	17.57777778	17.88777778	17.89333333	17.59333333	17.66111111	17.31111111	17.50888889	17.56	17.90666667	17.56	17.57888889	17.74666667	17.52555556	17.62222222	17.56666667	17.52111111	17.51666667	17.25444444	17.28777778	17.28333333	17.35888889	17.32333333	17.39444444	17.32666667	17.13444444	17.15333333	17.09	17.17333333	17.55222222	16.98777778	16.90222222	16.84222222	17.05222222	16.02777778	16.91666667	16.74666667	16.93444444
8/11/2019 12:00:15	-118.5138317	42.54324868	1239.2318	-118.5138199	42.5432429	1234.06436	-118.5138343	42.54324946	1233.1684	8/11/2019 12:01:14	19.26222222	19.44777778	19.31222222	19.56111111	19.59777778	19.36222222	19.40222222	19.03	19.13555556	19.36333333	19.65666667	19.42444444	19.35666667	19.51444444	19.22777778	19.37666667	19.29555556	19.32444444	19.25555556	19.02222222	19.08666667	19.07111111	19.21222222	19.06888889	19.16333333	19.17222222	18.92888889	18.94333333	18.94666667	18.99111111	19.28222222	18.79666667	18.67444444	18.77333333	18.77555556	18.10111111	18.64	18.24666667	18.57555556
8/11/2019 12:00:16	-118.5138594	42.54325864	1239.095194	-118.5138478	42.54325282	1234.010974	-118.513863	42.54326063	1233.011581	8/11/2019 12:01:15	22.63333333	22.78222222	22.75111111	23.04777778	22.87	22.81444444	22.85444444	22.42666667	22.61777778	22.72888889	23.02111111	22.82555556	22.76444444	22.94555556	22.72111111	22.81	22.65888889	22.72333333	22.73555556	22.42333333	22.49222222	22.5	22.56666667	22.42333333	22.57111111	22.60222222	22.31444444	22.33222222	22.26333333	22.40888889	22.68222222	22.14444444	22.14777778	21.83666667	21.78555556	21.05	21.82444444	21.55222222	22.02888889
8/11/2019 12:00:17	-118.5138876	42.54326784	1239.046484	-118.5138762	42.54326196	1234.010239	-118.5138926	42.54326748	1232.969806	8/11/2019 12:01:16	24.813	24.945	24.885	25.222	25.209	25.099	25.064	24.719	24.93	24.902	25.36	25.073	25.091	25.177	24.945	25.085	24.921	24.905	24.846	24.626	24.714	24.662	24.789	24.748	24.76	24.694	24.502	24.301	24.339	24.505	24.718	24.209	24.156	24.017	24.089	23.084	23.753	23.888	23.854
8/11/2019 12:00:18	-118.5139155	42.5432766	1238.967	-118.513904	42.54327069	1233.95236	-118.5139152	42.54326516	1232.8768	8/11/2019 12:01:17	22.27333333	22.12222222	22.09444444	22.49333333	22.39666667	22.29777778	22.31444444	21.92888889	22.05777778	22.22555556	22.64888889	22.29666667	22.36222222	22.32555556	22.09777778	22.30333333	22.06	22.20888889	22.09555556	21.88	21.97333333	21.84777778	22.03222222	21.94	22.05	21.99333333	21.78888889	21.70333333	21.79888889	21.83888889	22.15888889	21.59111111	21.57666667	21.50111111	21.52666667	20.48555556	21.29555556	21.11333333	21.33111111
8/11/2019 12:00:19	-118.5139426	42.54328542	1238.933594	-118.5139307	42.54327947	1233.887225	-118.5139416	42.54327178	1232.770281	8/11/2019 12:01:18	24.46333333	24.54	24.57555556	24.67	24.65111111	24.58	24.57222222	24.16111111	24.28	24.43666667	24.82777778	24.51111111	24.54	24.66555556	24.36777778	24.59555556	24.37666667	24.47	24.41333333	24.16555556	24.19888889	24.16555556	24.32	24.24666667	24.35777778	24.13666667	24.02444444	24.01222222	23.88777778	24.02777778	24.27111111	23.73555556	23.72222222	23.59333333	23.39666667	22.6	23.08888889	23.16666667	23.48111111
8/11/2019 12:00:20	-118.5139692	42.5432944	1238.9546	-118.513957	42.54328837	1233.87084	-118.5139693	42.54328176	1232.746967	8/11/2019 12:01:19	25.21777778	25.09444444	25.01666667	25.30888889	25.18333333	25.08888889	25.17222222	24.78222222	24.9	25.01	25.34222222	25.10888889	25.06555556	25.14888889	24.95555556	25.08444444	24.89222222	24.94333333	24.93222222	24.71888889	24.70111111	24.64444444	24.80333333	24.70444444	24.81	24.69555556	24.52888889	24.52888889	24.33333333	24.55222222	24.73555556	24.26777778	24.32555556	24.02666667	23.97	23.19777778	23.74555556	23.82111111	24.25333333
8/11/2019 12:00:21	-118.5139963	42.54330324	1238.97471	-118.5139836	42.54329703	1233.861352	-118.5139928	42.54328223	1232.77829	8/11/2019 12:01:20	25.8	25.90333333	25.79555556	25.98777778	26.07666667	25.86555556	25.80222222	25.47	25.66777778	25.80444444	26.13222222	25.91555556	25.86444444	25.95555556	25.68111111	25.85	25.69888889	25.81	25.77888889	25.53555556	25.48222222	25.49666667	25.57111111	25.50777778	25.55333333	25.53444444	25.28888889	25.21444444	25.30666667	25.40777778	25.55444444	25.19555556	25.14333333	25.24	24.99222222	24.05111111	24.78222222	24.46555556	24.77333333
8/11/2019 12:00:22	-118.5140233	42.54331115	1238.99371	-118.5140095	42.54330457	1233.841255	-118.5140252	42.54327713	1232.909065	8/11/2019 12:01:21	26.57777778	26.65888889	26.68	26.82888889	26.80777778	26.62555556	26.69444444	26.32	26.49444444	26.51555556	26.90777778	26.52222222	26.66222222	26.68888889	26.50333333	26.60666667	26.47666667	26.58555556	26.44777778	26.31777778	26.29333333	26.28	26.29666667	26.31888889	26.23666667	26.23111111	26.04777778	26.03	25.92333333	26.10777778	26.43555556	25.84555556	25.78333333	25.79	25.43666667	24.96555556	25.61444444	25.27666667	25.55444444
8/11/2019 12:00:23	-118.5140497	42.5433187	1239.0792	-118.5140366	42.54331216	1233.8976	-118.5140538	42.543281	1233.1086	8/11/2019 12:01:22	28.67666667	28.68888889	28.70555556	28.90111111	28.63666667	28.65555556	28.58555556	28.20777778	28.33222222	28.46	28.95444444	28.70888889	28.57111111	28.78333333	28.51555556	28.59555556	28.38555556	28.57555556	28.36222222	28.32333333	28.15666667	28.13777778	28.21	28.09222222	28.21	28.07444444	27.93444444	27.92	27.92	27.88888889	28.07222222	27.59333333	27.65444444	27.53333333	27.38333333	26.5	27.41222222	27.40111111	27.47
8/11/2019 12:00:24	-118.5140757	42.54332637	1239.138323	-118.5140621	42.54331962	1233.934645	-118.5140836	42.54329215	1233.330484	8/11/2019 12:01:23	29.55	29.37666667	29.39777778	29.82	29.57111111	29.53888889	29.59777778	29.25444444	29.37888889	29.58333333	29.89333333	29.71	29.66444444	29.72333333	29.51777778	29.62111111	29.41444444	29.50888889	29.39222222	29.14777778	29.13333333	29.12	29.19222222	29.05666667	29.10333333	29.02111111	28.74888889	28.72111111	28.66	28.85222222	28.96666667	28.49111111	28.58222222	28.44777778	28.40333333	27.25222222	28.15111111	27.98555556	28.24111111
8/11/2019 12:00:25	-118.5141019	42.54333345	1239.117258	-118.5140883	42.5433268	1233.883984	-118.5141194	42.54331514	1233.565258	8/11/2019 12:01:24	30.298	30.38	30.23	30.561	30.479	30.3	30.305	30.017	30.127	30.417	30.722	30.421	30.395	30.425	30.215	30.365	30.17	30.144	30.087	29.891	29.853	29.816	29.921	29.799	29.791	29.646	29.381	29.408	29.367	29.44	29.698	29.233	29.189	28.999	28.96	28.148	28.769	28.544	29.075
8/11/2019 12:00:26	-118.5141288	42.54334051	1239.086677	-118.5141145	42.54333353	1233.834371	-118.5141369	42.54331375	1233.612032	8/11/2019 12:01:25	28.43222222	28.55	28.54	28.87	28.75444444	28.77444444	28.57777778	28.31111111	28.39333333	28.52777778	28.88555556	28.65111111	28.56888889	28.66777778	28.44777778	28.55333333	28.41555556	28.34222222	28.35222222	28.14555556	28.15444444	28.05111111	28.16444444	28.12333333	27.95666667	27.96555556	27.79666667	27.64777778	27.64666667	27.77	27.86	27.33666667	27.42555556	27.26666667	26.99777778	26.62222222	26.86555556	27.11555556	27.14444444
8/11/2019 12:00:27	-118.5141553	42.54334775	1239.05729	-118.5141412	42.54334053	1233.817245	-118.5141623	42.54333463	1233.49729	8/11/2019 12:01:26	25.00666667	24.67333333	24.70777778	25.01	24.99777778	24.87333333	24.94444444	24.49333333	24.75666667	24.71888889	25.13111111	24.83666667	24.79777778	24.82222222	24.67222222	24.74555556	24.67444444	24.73111111	24.67777778	24.39	24.38222222	24.36444444	24.48111111	24.34444444	24.47	24.30111111	24.14222222	24.14888889	24.01111111	24.23	24.37444444	23.98888889	23.84777778	23.45333333	23.45666667	23.00111111	23.45444444	23.53555556	23.65222222
8/11/2019 12:00:28	-118.5141816	42.54335478	1239.0896	-118.5141673	42.54334731	1233.81796	-118.5141802	42.54336208	1233.254	8/11/2019 12:01:27	19.99555556	19.80888889	19.82333333	19.99888889	20.09777778	19.88444444	19.91222222	19.56666667	19.78777778	19.80333333	20.18666667	19.90888889	19.80111111	19.93333333	19.78777778	19.91444444	19.72555556	19.75444444	19.67666667	19.48222222	19.61	19.56888889	19.55	19.55777778	19.54888889	19.54	19.31333333	19.37111111	19.26666667	19.42888889	19.60666667	19.21777778	19.11	18.91222222	19.08444444	18.52777778	18.96111111	18.97111111	18.94222222
8/11/2019 12:00:29	-118.5142084	42.5433619	1239.180065	-118.5141938	42.54335426	1233.849823	-118.5142045	42.54337849	1233.030323	8/11/2019 12:01:28	17.13	16.89555556	16.95555556	17.08111111	17.12222222	16.95444444	16.95333333	16.50444444	16.66	16.78444444	17.16333333	16.78444444	16.88444444	16.93333333	16.80333333	16.87111111	16.62222222	16.70111111	16.67777778	16.36888889	16.51	16.44555556	16.63888889	16.53333333	16.55666667	16.60444444	16.29222222	16.39777778	16.33333333	16.46222222	16.65888889	16.1	16.08222222	16.21222222	16.32444444	15.66777778	16.25888889	15.85111111	16.24444444
8/11/2019 12:00:30	-118.5142359	42.54336915	1239.230871	-118.5142214	42.54336139	1233.885242	-118.5142245	42.54338536	1232.883419	8/11/2019 12:01:29	17.15444444	17.17222222	17.06777778	17.48666667	17.45555556	17.02555556	17.21222222	16.73666667	16.93666667	17.01222222	17.28333333	17.03444444	17.09777778	17.17333333	16.91777778	17.05	16.96666667	16.95777778	16.87777778	16.64222222	16.69666667	16.62555556	16.76888889	16.75111111	16.74111111	16.65888889	16.59444444	16.58111111	16.63333333	16.59777778	16.97	16.45111111	16.38555556	16.49333333	16.35888889	16.01	16.57888889	16.26555556	16.26666667
8/11/2019 12:00:31	-118.5142637	42.54337644	1239.2274	-118.5142493	42.54336861	1233.9168	-118.5142364	42.54336528	1233.0454	8/11/2019 12:01:30	17.17111111	17.29444444	17.30333333	17.57666667	17.42333333	17.26444444	17.34444444	16.88888889	17.11666667	17.16222222	17.53111111	17.21888889	17.12333333	17.24555556	17.04111111	17.22111111	17.07333333	17.05777778	17.13333333	16.70444444	16.89111111	16.86111111	16.97444444	16.84888889	16.90777778	16.88666667	16.71111111	16.80333333	16.68333333	16.94	17.14	16.56888889	16.52111111	16.72777778	16.62333333	16.10111111	16.63444444	16.37	16.47333333
8/11/2019 12:00:32	-118.5142934	42.54338431	1239.222194	-118.5142785	42.54337627	1233.94221	-118.5142726	42.54336039	1233.247742	8/11/2019 12:01:31	19.83888889	19.72666667	19.64222222	19.82444444	19.90222222	19.60444444	19.66111111	19.34555556	19.41444444	19.55666667	19.88444444	19.61111111	19.59888889	19.59777778	19.48777778	19.53555556	19.48666667	19.44666667	19.42666667	19.24444444	19.23222222	19.22	19.37444444	19.33666667	19.31333333	19.34444444	19.17444444	19.11	19.01666667	19.19444444	19.55111111	19.03888889	19.06777778	19.15888889	19.17	18.10888889	19.02444444	18.58444444	19.28444444
8/11/2019 12:00:33	-118.5143263	42.5433929	1239.245677	-118.5143117	42.5433849	1233.975348	-118.5143307	42.54337984	1233.549	8/11/2019 12:01:32	18.731	18.621	18.646	18.833	18.925	18.665	18.637	18.311	18.521	18.514	18.853	18.538	18.603	18.6	18.463	18.601	18.458	18.439	18.413	18.091	18.194	18.173	18.32	18.25	18.264	18.275	18.117	18.06	18.115	18.148	18.541	17.918	17.914	17.991	18.194	17.426	18.013	17.887	18.019
8/11/2019 12:00:34	-118.5143627	42.54340214	1239.293968	-118.5143476	42.54339416	1234.045774	-118.5143749	42.54339215	1233.693452	8/11/2019 12:01:33	18.42777778	18.49888889	18.38666667	18.69222222	18.66222222	18.38666667	18.68222222	18.08111111	18.34222222	18.39333333	18.74555556	18.52222222	18.49555556	18.48777778	18.27555556	18.45555556	18.39333333	18.26777778	18.31	18.08333333	18.13111111	17.95555556	18.15555556	18.13444444	18.16444444	18.20555556	17.97222222	17.88111111	17.94	18.03666667	18.16111111	17.79222222	17.86666667	18.14222222	18.04555556	17.08555556	17.65888889	17.41111111	17.83888889
8/11/2019 12:00:35	-118.5144011	42.54341212	1239.322613	-118.5143847	42.5434037	1234.08821	-118.5143949	42.54340105	1233.680226	8/11/2019 12:01:34	24.59444444	24.63555556	24.46444444	24.85111111	24.74444444	24.54666667	24.64888889	24.27777778	24.47555556	24.56333333	24.86222222	24.56666667	24.56888889	24.65888889	24.46222222	24.56555556	24.41222222	24.45222222	24.49555556	24.24666667	24.21888889	24.15222222	24.31	24.28111111	24.31444444	24.25111111	24.10222222	24.12888889	23.97666667	24.16555556	24.31777778	23.75555556	23.85777778	23.71333333	23.48222222	22.78	23.51111111	23.50111111	23.66111111
8/11/2019 12:00:36	-118.5144404	42.54342284	1239.3026	-118.5144254	42.54341482	1234.0613	-118.514439	42.54341604	1233.7254	8/11/2019 12:01:35	21.46111111	21.13777778	21.40777778	21.53	21.54777778	21.35	21.39333333	21.12555556	21.18888889	21.43222222	21.66666667	21.39222222	21.43444444	21.50666667	21.25777778	21.32888889	21.22555556	21.21111111	21.21888889	20.94	21.02444444	21.04888889	21.08333333	20.95	20.92	21.02	20.80777778	20.75888889	20.7	20.86111111	21.07777778	20.58777778	20.56222222	20.46111111	20.28444444	19.74666667	20.23333333	20.46444444	20.41444444
8/11/2019 12:00:37	-118.5144806	42.54343375	1239.270226	-118.5144653	42.54342585	1233.9991	-118.5144745	42.54342472	1233.718065	8/11/2019 12:01:36	17.18444444	17.08	17.08	17.44111111	17.33666667	17.18888889	17.19	16.68	16.91333333	17.01444444	17.31444444	17.03555556	16.95111111	17.01	16.83	16.85888889	16.82444444	16.83222222	16.80111111	16.48222222	16.68222222	16.48444444	16.69888889	16.58777778	16.59333333	16.57888889	16.28888889	16.30666667	16.19666667	16.26111111	16.65222222	16.06333333	15.95222222	15.94666667	16.02444444	15.41444444	16.13666667	15.86333333	15.87
8/11/2019 12:00:38	-118.514522	42.54344524	1239.175645	-118.5145066	42.54343745	1233.939416	-118.5145119	42.54343622	1233.629484	8/11/2019 12:01:37	16.60444444	16.51777778	16.38333333	16.82	16.71666667	16.57444444	16.48777778	16.21222222	16.38222222	16.36888889	16.79666667	16.40888889	16.41777778	16.50555556	16.28333333	16.38333333	16.23222222	16.26777778	16.16666667	16.00444444	16.01	15.90666667	16.07777778	15.86666667	16.05666667	15.99444444	15.73222222	15.74888889	15.71	15.88555556	16.04222222	15.47888889	15.38444444	15.48333333	15.63777778	15.04333333	15.87	15.47666667	15.48111111
8/11/2019 12:00:39	-118.5145641	42.54345684	1239.079774	-118.5145483	42.54344909	1233.878739	-118.5145573	42.54345106	1233.600258	8/11/2019 12:01:38	17.19111111	17.21333333	17.04444444	17.32111111	17.36111111	17.20222222	17.18666667	16.78222222	16.91333333	16.88333333	17.33555556	17.02444444	17.04888889	17.07	16.80222222	16.94777778	16.87888889	16.90333333	16.75111111	16.60555556	16.65222222	16.54222222	16.63666667	16.56333333	16.62888889	16.54666667	16.39888889	16.37666667	16.2	16.41666667	16.70111111	16.08222222	15.92	16.22666667	16.54777778	15.48555556	16.32888889	15.81666667	15.98888889
8/11/2019 12:00:40	-118.5146053	42.54346778	1239.042226	-118.5145898	42.54346016	1233.878642	-118.5146102	42.54346142	1233.535742	8/11/2019 12:01:39	19.49222222	19.29333333	19.32222222	19.59	19.56	19.32555556	19.24777778	18.94111111	19.10888889	19.20555556	19.49666667	19.11888889	19.04	19.1	18.93444444	19.02222222	18.85333333	18.90111111	18.84888889	18.62666667	18.61111111	18.54444444	18.64555556	18.57666667	18.59	18.59555556	18.31777778	18.33	18.32333333	18.44555556	18.59888889	18.12555556	18.08222222	18.24	18.48444444	17.41333333	18.39111111	17.83666667	18.11888889
8/11/2019 12:00:41	-118.5146459	42.54347858	1239.0234	-118.5146306	42.543471	1233.89692	-118.514653	42.54347634	1233.36	8/11/2019 12:01:40	20.50444444	20.61333333	20.45111111	20.82	20.66777778	20.50111111	20.43333333	19.96444444	20.14888889	20.22777778	20.56444444	20.23	20.15333333	20.31222222	20.07333333	20.12111111	20.00555556	20.01666667	19.87555556	19.67222222	19.67	19.57888889	19.74222222	19.66222222	19.6	19.6	19.48666667	19.36444444	19.43666667	19.42	19.74333333	19.19444444	19.15777778	19.24888889	19.45333333	18.60888889	19.39555556	18.87	19.15222222
8/11/2019 12:00:42	-118.5146871	42.54348974	1238.996774	-118.5146716	42.54348206	1233.911087	-118.5146704	42.54349928	1233.032645	8/11/2019 12:01:41	23.008	22.861	22.788	23.062	23.053	22.96	22.752	22.378	22.467	22.59	22.9	22.593	22.523	22.585	22.392	22.406	22.238	22.263	22.18	21.95	21.953	21.924	21.974	21.848	21.893	21.821	21.574	21.611	21.514	21.746	21.882	21.333	21.375	21.639	21.675	20.981	21.355	20.978	21.243
8/11/2019 12:00:43	-118.5147283	42.54350028	1238.987065	-118.5147132	42.54349273	1233.895106	-118.5146923	42.5435017	1232.625129	8/11/2019 12:01:42	24.36333333	24.06222222	24.13333333	24.30666667	24.27111111	24	23.98888889	23.61222222	23.67444444	23.72888889	24.02555556	23.68333333	23.68777778	23.71111111	23.56666667	23.60333333	23.49444444	23.43555556	23.43111111	23.05111111	23.15222222	22.99111111	23.16666667	23.07333333	23.06333333	22.99111111	22.73444444	22.75333333	22.77666667	22.76333333	23.08	22.40555556	22.48444444	22.57777778	22.85666667	22.10777778	22.43111111	22.05777778	22.33
8/11/2019 12:00:44	-118.51477	42.54351036	1238.9776	-118.5147549	42.54350279	1233.8741	-118.5147227	42.54350332	1232.2408	8/11/2019 12:01:43	23.82666667	23.83	23.67444444	23.83666667	23.89777778	23.62222222	23.60333333	23.11111111	23.27555556	23.31	23.67888889	23.32444444	23.35555556	23.26555556	23.08888889	23.21222222	23.04111111	22.97555556	22.97333333	22.59	22.68111111	22.66111111	22.72111111	22.6	22.60444444	22.54777778	22.32888889	22.34333333	22.24222222	22.35333333	22.57777778	22.06444444	22.1	22.27111111	22.66666667	21.75444444	22.01111111	21.72555556	21.93
8/11/2019 12:00:45	-118.5148108	42.54351974	1238.938065	-118.5147955	42.54351212	1233.819768	-118.514777	42.54352034	1232.038968	8/11/2019 12:01:44	22.02333333	21.98888889	21.89666667	22.14333333	21.99444444	21.73333333	21.72666667	21.31222222	21.44	21.56333333	21.85777778	21.42111111	21.43777778	21.48333333	21.22333333	21.35777778	21.11555556	21.12111111	21.05111111	20.75111111	20.75888889	20.70666667	20.84111111	20.68	20.69444444	20.68111111	20.47444444	20.42333333	20.32333333	20.42666667	20.75666667	20.21444444	20.35444444	20.43111111	20.65333333	19.73222222	20.59444444	19.95666667	20.26666667
8/11/2019 12:00:46	-118.5148516	42.54352852	1238.979258	-118.5148361	42.54352092	1233.824706	-118.5148375	42.54352228	1232.331258	8/11/2019 12:01:45	21.59	21.55888889	21.45	21.59444444	21.57888889	21.36333333	21.27777778	21.01888889	21.02555556	20.99333333	21.38666667	21.11333333	21.00888889	21.03777778	20.76777778	20.96666667	20.69666667	20.67444444	20.63777778	20.28777778	20.31555556	20.19555556	20.28666667	20.24555556	20.21888889	20.18666667	19.93222222	19.89444444	19.79666667	20.06444444	20.21	19.76333333	19.82	19.89777778	20.28333333	19.44444444	19.93444444	19.48333333	20.01333333
8/11/2019 12:00:47	-118.5148919	42.5435375	1239.04571	-118.5148763	42.54352988	1233.864371	-118.5148944	42.5435278	1232.684677	8/11/2019 12:01:46	21.31111111	21.34666667	21.22888889	21.35888889	21.14666667	21.01444444	20.92444444	20.53111111	20.63111111	20.56666667	21.01444444	20.60333333	20.55888889	20.73666667	20.44555556	20.46888889	20.27777778	20.35888889	20.26333333	19.99333333	20.05888889	19.98777778	20.03888889	19.84666667	19.93555556	19.91222222	19.71777778	19.61333333	19.61666667	19.8	19.93	19.52777778	19.58666667	19.85666667	20.24888889	19.23	19.77	19.15666667	19.47333333
8/11/2019 12:00:48	-118.5149311	42.54354596	1239.098677	-118.5149154	42.54353834	1233.898874	-118.5149633	42.5435357	1232.804355	8/11/2019 12:01:47	21.91111111	21.99333333	21.69222222	21.87111111	21.66555556	21.31777778	21.38333333	20.92	21.1	21.15888889	21.54666667	21.26555556	21.21111111	21.26555556	21.05222222	21.20555556	21.09111111	21.01777778	20.96	20.75	20.78777778	20.72	20.84333333	20.73	20.73666667	20.71333333	20.54333333	20.44222222	20.35666667	20.45777778	20.86	20.21555556	20.17111111	20.17888889	20.48222222	19.70555556	20.11444444	19.7	19.64666667
8/11/2019 12:00:49	-118.5149695	42.54355404	1239.143	-118.514954	42.5435464	1233.9171	-118.5149887	42.54353786	1232.6826	8/11/2019 12:01:48	21.27333333	21.10666667	20.85222222	20.95888889	20.78	20.52777778	20.53888889	20.20555556	20.3	20.31888889	20.65	20.38333333	20.44555556	20.50222222	20.23444444	20.49222222	20.35111111	20.44666667	20.46	20.07555556	20.22	20.17777778	20.14666667	20.11444444	20.18222222	20.12777778	19.81222222	19.86555556	19.73	19.9	20.15	19.56555556	19.50666667	19.78777778	19.66555556	19.09888889	19.34888889	18.96888889	18.75555556
8/11/2019 12:00:50	-118.5150075	42.54356213	1239.151065	-118.5149917	42.54355445	1233.898387	-118.5149955	42.54355051	1232.34729	8/11/2019 12:01:49	22.59777778	22.54111111	22.07111111	22.20555556	21.88	21.72111111	21.63222222	21.16222222	21.38333333	21.51	21.85777778	21.61	21.64888889	21.77111111	21.60222222	21.74	21.75555556	21.76777778	21.79777778	21.56777778	21.51222222	21.47666667	21.69222222	21.54777778	21.57222222	21.51333333	21.27444444	21.15444444	21.13666667	21.22333333	21.39666667	20.84888889	20.79666667	20.84333333	20.64444444	19.75777778	20.61555556	19.63666667	19.78
8/11/2019 12:00:51	-118.5150431	42.54356882	1239.24796	-118.5150276	42.54356104	1233.985444	-118.5150176	42.54355586	1232.20532	8/11/2019 12:01:50	23.619	23.342	22.976	23.037	22.844	22.641	22.557	22.115	22.308	22.316	22.709	22.429	22.488	22.638	22.502	22.653	22.667	22.779	22.749	22.54	22.644	22.521	22.728	22.628	22.64	22.595	22.259	22.338	22.102	22.262	22.46	21.857	21.818	21.844	21.945	20.909	21.245	20.615	20.372
8/11/2019 12:00:52	-118.5150835	42.54357616	1239.244568	-118.5150679	42.54356807	1233.969141	-118.5150516	42.5435806	1232.358108	8/11/2019 12:01:51	23.43333333	23.13777778	22.75666667	22.94111111	22.91444444	22.59222222	22.50555556	22.14222222	22.32111111	22.33666667	22.74777778	22.43222222	22.46777778	22.55444444	22.31777778	22.52	22.37222222	22.41	22.43777778	22.1	22.29777778	22.12333333	22.26444444	22.25222222	22.21333333	22.19444444	21.88666667	21.86	21.84	21.96333333	22.19555556	21.67333333	21.56333333	21.72555556	21.61333333	20.87	21.33444444	20.88444444	20.68222222
8/11/2019 12:00:53	-118.5151234	42.5435839	1239.206	-118.5151077	42.5435756	1233.913325	-118.515091	42.54359215	1232.3095	8/11/2019 12:01:52	20.57555556	20.79111111	20.45	20.50666667	20.58111111	20.43777778	20.33444444	19.91666667	20.09888889	20.10888889	20.46111111	20.20222222	20.05666667	20.09444444	19.89777778	19.97111111	19.79888889	19.78	19.77	19.48666667	19.47555556	19.39333333	19.47555556	19.41333333	19.41666667	19.42	19.22111111	19.12111111	19.07	19.16666667	19.51777778	18.98111111	18.80222222	19.05333333	19.26444444	18.54333333	19.04555556	18.78222222	18.99
8/11/2019 12:00:54	-118.5151629	42.54359218	1239.101297	-118.5151469	42.54358366	1233.832473	-118.5151349	42.54359297	1232.037595	8/11/2019 12:01:53	19.95	19.87222222	19.71111111	20.02	19.92	19.74333333	19.64888889	19.14222222	19.45555556	19.29666667	19.69888889	19.26333333	19.30777778	19.32666667	19.11444444	19.32777778	19.09777778	19.09222222	18.95111111	18.69444444	18.71444444	18.66444444	18.74	18.66666667	18.72111111	18.69666667	18.36444444	18.47666667	18.31	18.43444444	18.81777778	18.25888889	18.30111111	18.42222222	18.66444444	17.97777778	18.28333333	17.99444444	18.45777778
8/11/2019 12:00:55	-118.5152054	42.54360144	1239.078419	-118.5151894	42.54359287	1233.812906	-118.515187	42.54360204	1231.846323	8/11/2019 12:01:54	20.18222222	19.90888889	19.93777778	20.08555556	19.97111111	19.88	19.66333333	19.38888889	19.59	19.61777778	19.86111111	19.52888889	19.50444444	19.45666667	19.41777778	19.36888889	19.32111111	19.20888889	19.21	18.90444444	18.96222222	18.86555556	19.02222222	18.87555556	18.89	18.84333333	18.59111111	18.67777778	18.49333333	18.62333333	18.87555556	18.50444444	18.34	18.72333333	18.91444444	18.12555556	18.65555556	18.08222222	18.39444444
8/11/2019 12:00:56	-118.5152449	42.54360921	1239.149097	-118.515229	42.54360074	1233.866971	-118.515228	42.54360872	1231.766387	8/11/2019 12:01:55	16.82222222	16.6	16.73111111	16.89444444	16.74	16.51888889	16.48	16.01444444	16.17666667	16.17333333	16.54777778	16.21222222	16.14111111	16.27444444	15.98888889	16.13555556	15.98777778	16.02555556	15.92666667	15.64777778	15.63111111	15.58333333	15.73666667	15.67444444	15.61222222	15.52222222	15.38666667	15.39333333	15.37666667	15.34666667	15.82333333	15.10888889	14.96666667	15.37333333	15.65555556	14.85666667	15.75333333	15.15	15.42
8/11/2019 12:00:57	-118.5152847	42.54361764	1239.2548	-118.5152689	42.54360923	1233.95406	-118.5152606	42.54361858	1231.8666	8/11/2019 12:01:56	16.18555556	16.19888889	16.16	16.31777778	16.38333333	16.08888889	16.01111111	15.64222222	15.77888889	15.85111111	16.19111111	15.86666667	15.85333333	15.89666667	15.68888889	15.77444444	15.61	15.56777778	15.67111111	15.29777778	15.32222222	15.28888889	15.40777778	15.32666667	15.34777778	15.29777778	15.06555556	15.13333333	15.14666667	15.08555556	15.47111111	14.89	14.83555556	14.98666667	15.32888889	14.59444444	15.38777778	14.96444444	15.12
8/11/2019 12:00:58	-118.5153238	42.54362631	1239.237452	-118.5153078	42.54361754	1233.9607	-118.5152968	42.54362709	1231.873516	8/11/2019 12:01:57	16.02222222	16.03444444	15.98111111	16.20222222	16.09777778	15.81111111	15.80666667	15.38666667	15.55333333	15.66111111	15.96444444	15.48333333	15.55555556	15.60444444	15.40888889	15.45888889	15.33	15.29222222	15.38444444	15.01666667	15.15111111	15.02111111	15.01333333	15.00555556	15.00444444	15.00222222	14.76333333	14.84333333	14.76333333	14.83444444	15.16222222	14.61555556	14.51222222	14.84666667	15.11444444	14.52888889	15.24	14.53888889	14.83333333
8/11/2019 12:00:59	-118.5153636	42.54363538	1239.199581	-118.5153477	42.54362632	1233.935945	-118.5153286	42.54363635	1231.836871	8/11/2019 12:01:58	15.512	15.569	15.393	15.63	15.495	15.278	15.274	14.743	14.975	15.044	15.413	15.033	15.095	15.128	14.881	14.991	14.904	14.811	14.878	14.541	14.611	14.605	14.663	14.551	14.606	14.634	14.335	14.397	14.338	14.493	14.693	14.216	14.071	14.464	14.791	13.865	14.673	14.262	14.448
8/11/2019 12:01:00	-118.5154036	42.54364526	1239.17371	-118.5153876	42.54363598	1233.907029	-118.5153743	42.5436482	1231.717806	8/11/2019 12:01:59	15.19888889	15.07444444	15.09666667	15.54111111	15.41555556	15.13444444	15.06111111	14.75444444	14.94222222	14.91555556	15.26222222	15.01666667	14.93444444	14.98333333	14.78666667	14.94444444	14.67	14.74666667	14.67777778	14.41666667	14.43	14.40777778	14.54111111	14.46777778	14.64444444	14.49666667	14.27666667	14.28333333	14.31	14.47333333	14.60888889	14.19777778	13.96	14.28666667	14.81222222	13.74	14.70222222	14.00777778	14.16444444
8/11/2019 12:01:01	-118.5154443	42.5436553	1239.179323	-118.515428	42.54364595	1233.863171	-118.5154287	42.54365481	1231.553258	8/11/2019 12:02:00	16.59888889	16.70111111	16.66666667	16.84222222	17.00111111	16.51666667	16.55666667	16.19333333	16.38	16.42888889	16.70111111	16.44777778	16.41555556	16.45777778	16.14777778	16.36444444	16.15444444	16.20444444	16.25	15.85444444	15.92444444	15.92888889	15.96333333	15.94444444	15.94666667	15.96	15.67	15.76444444	15.69333333	15.83666667	16.00444444	15.52333333	15.48777778	15.62444444	15.97333333	15.22555556	15.84666667	15.45	15.67666667
8/11/2019 12:01:02	-118.5154838	42.54366388	1239.219	-118.5154672	42.54365459	1233.850943	-118.5154684	42.5436605	1231.521	8/11/2019 12:02:01	18.29111111	18.31555556	18.26555556	18.41	18.44222222	18.25444444	18.16333333	17.83777778	17.88777778	17.96222222	18.28444444	17.91333333	17.92777778	18.00666667	17.80555556	17.91888889	17.74555556	17.71555556	17.64666667	17.41666667	17.40555556	17.44444444	17.46222222	17.37222222	17.40777778	17.40888889	17.23555556	17.21444444	17.24333333	17.35888889	17.62444444	17.13	17.06555556	17.22444444	17.74	16.96444444	17.5	17.05555556	17.34333333
8/11/2019 12:01:03	-118.5155145	42.54366959	1239.25916	-118.5154976	42.54366008	1233.864256	-118.5154901	42.54366718	1231.54084	8/11/2019 12:02:02	18.88777778	18.74444444	18.90444444	18.92111111	18.90111111	18.74555556	18.70333333	18.28666667	18.46777778	18.44666667	18.88	18.44	18.45555556	18.48888889	18.35111111	18.44	18.26777778	18.2	18.26555556	17.96111111	18.03777778	17.92555556	18.03777778	18.00888889	17.95333333	17.87777778	17.67888889	17.77666667	17.71666667	17.88888889	18.09111111	17.65444444	17.6	17.73111111	18.20888889	17.28888889	17.76	17.37777778	17.71666667
8/11/2019 12:01:04	-118.5155305	42.54366776	1239.199243	-118.515514	42.54365803	1233.844295	-118.5155029	42.54366657	1231.559946	8/11/2019 12:02:03	17.82777778	17.88555556	17.79222222	17.98444444	17.97444444	17.83111111	17.73333333	17.32111111	17.40444444	17.52444444	17.84888889	17.46111111	17.54888889	17.55222222	17.25555556	17.39777778	17.30888889	17.24666667	17.16333333	16.93888889	16.92222222	16.90222222	17.12222222	16.96222222	16.93333333	17.00777778	16.73666667	16.79	16.68666667	16.82333333	17.16777778	16.61666667	16.49777778	16.59555556	17.07	16.43	16.86111111	16.49444444	16.62888889
8/11/2019 12:01:05	-118.5155445	42.54365493	1239.200935	-118.5155276	42.54364523	1233.82269	-118.5155164	42.54365358	1231.562065	8/11/2019 12:02:04	16.99777778	16.89	16.80777778	17.03333333	16.97666667	16.87666667	16.72555556	16.31666667	16.56222222	16.64444444	16.95	16.57777778	16.54888889	16.58888889	16.32666667	16.56111111	16.33444444	16.28333333	16.37555556	16.02666667	16.15111111	16.02777778	16.23111111	16.19222222	16.21111111	16.11666667	15.87555556	15.88444444	15.93	16.05777778	16.27	15.76111111	15.71666667	15.94777778	16.24666667	15.45222222	16.03333333	15.63	15.84333333
8/11/2019 12:01:06	-118.5155585	42.54363618	1239.2966	-118.5155415	42.54362653	1233.83034	-118.5155386	42.5436333	1231.5468	8/11/2019 12:02:05	15.75666667	15.60555556	15.59777778	15.85	15.75222222	15.55333333	15.54444444	15.07444444	15.25	15.31333333	15.60222222	15.34444444	15.33777778	15.30444444	15.14555556	15.22666667	15.08	15.1	15.08666667	14.78666667	14.91111111	14.78777778	14.92777778	14.86666667	14.89888889	14.79888889	14.64222222	14.74	14.71333333	14.91	15.13111111	14.49888889	14.50444444	14.73555556	15.24333333	14.25666667	14.95222222	14.48111111	14.69222222
8/11/2019 12:01:07	-118.5155736	42.54361335	1239.393742	-118.5155562	42.54360395	1233.816745	-118.5155736	42.54360841	1231.396355	8/11/2019 12:02:06	17.40222222	17.38777778	17.2	17.56111111	17.35555556	17.10666667	17.23777778	16.71888889	16.97666667	16.97444444	17.29333333	16.96111111	17.00777778	16.93	16.81888889	16.85666667	16.72444444	16.71666667	16.75888889	16.38333333	16.51333333	16.31555556	16.44333333	16.37777778	16.52	16.45222222	16.22888889	16.32777778	16.25	16.42333333	16.63222222	16.12888889	16.15333333	16.34444444	16.63333333	15.95333333	16.50111111	15.96222222	16.27333333
8/11/2019 12:01:08	-118.5155884	42.5435897	1239.448903	-118.5155708	42.54358059	1233.768216	-118.5155965	42.54358268	1231.201	8/11/2019 12:02:07	18.387	18.331	18.128	18.416	18.308	18.217	18.078	17.664	17.863	17.867	18.323	17.85	17.804	17.839	17.682	17.722	17.673	17.626	17.597	17.372	17.393	17.292	17.445	17.321	17.39	17.362	17.165	17.085	17.134	17.312	17.572	17.019	16.893	17.305	17.677	16.704	17.284	17.041	17.21
8/11/2019 12:01:09	-118.5155938	42.54357633	1239.458097	-118.5155766	42.54356673	1233.799877	-118.5155867	42.54356682	1231.235258	8/11/2019 12:02:08	16.96666667	16.76555556	16.89333333	17.05111111	16.93888889	16.78777778	16.76444444	16.3	16.40222222	16.47555556	16.87888889	16.47	16.45222222	16.50888889	16.33111111	16.46333333	16.24333333	16.20222222	16.25222222	15.89888889	16.06111111	15.92111111	16.01111111	15.98	15.93333333	16.08333333	15.72111111	15.78666667	15.69	15.88	16.29444444	15.63222222	15.71777778	16.00333333	16.35	15.44	16.42444444	15.63111111	15.84333333
8/11/2019 12:01:10	-118.5155868	42.54356933	1239.488968	-118.5155697	42.54355948	1233.829371	-118.5155825	42.54356006	1231.156645	8/11/2019 12:02:09	16.37333333	16.38888889	16.05666667	16.42111111	16.33111111	16.02333333	15.97333333	15.63888889	15.69444444	15.76555556	16.16	15.70222222	15.7	15.73	15.54888889	15.72666667	15.58333333	15.5	15.63777778	15.23111111	15.29444444	15.22222222	15.40111111	15.33333333	15.27333333	15.25444444	15.00444444	15.13111111	15.10333333	15.15888889	15.61666667	15.01888889	14.90888889	15.58222222	15.73333333	14.92222222	15.55888889	15.13444444	15.33333333
8/11/2019 12:01:11	-118.5155736	42.54356188	1239.504903	-118.515557	42.5435519	1233.853532	-118.5155735	42.54355106	1231.109355	8/11/2019 12:02:10	19.24	18.93777778	18.89111111	19.12555556	19.06111111	19.02888889	18.87888889	18.33333333	18.65111111	18.62222222	18.99333333	18.64	18.66333333	18.77888889	18.48333333	18.50888889	18.47333333	18.38555556	18.44777778	18.12	18.24777778	18.1	18.16666667	18.11666667	18.12444444	18.14	17.94222222	17.90555556	17.86666667	18.10333333	18.36666667	17.60222222	17.74	17.73111111	18.00333333	17.72555556	18.09666667	17.56111111	17.87
8/11/2019 12:01:12	-118.515557	42.5435546	1239.4726	-118.51554	42.54354401	1233.8502	-118.5155558	42.54354178	1231.1162	8/11/2019 12:02:11	19.18333333	19.03333333	18.83444444	19.30666667	19.00555556	18.83333333	18.73777778	18.27555556	18.5	18.66444444	18.96	18.57111111	18.49555556	18.59666667	18.40666667	18.49111111	18.46666667	18.39888889	18.38555556	18.15333333	18.19555556	18.06777778	18.21666667	18.12222222	18.06666667	18.15	17.91555556	17.91444444	17.84666667	17.96444444	18.31555556	17.74444444	17.56888889	17.98777778	18.04666667	17.29	18.05777778	17.59111111	17.70333333
8/11/2019 12:01:13	-118.5155373	42.54354815	1239.447548	-118.5155202	42.54353713	1233.860548	-118.515533	42.54353439	1231.113742	8/11/2019 12:02:12	19.32	19.24888889	19.23666667	19.42777778	19.26333333	18.97666667	18.84111111	18.55555556	18.78555556	18.81888889	19.13444444	18.75444444	18.81666667	18.82333333	18.65	18.81333333	18.65777778	18.70888889	18.76888889	18.39	18.48111111	18.34888889	18.59111111	18.52111111	18.5	18.47666667	18.25333333	18.21111111	18.14333333	18.30666667	18.45888889	18.00444444	17.87111111	17.73777778	18.31333333	17.28888889	18.08888889	17.57888889	17.53
8/11/2019 12:01:14	-118.5155159	42.54354076	1239.481226	-118.5154986	42.54352956	1233.879155	-118.5154915	42.54352398	1231.375194	8/11/2019 12:02:13	17.39	17.15555556	16.71222222	16.73111111	16.57666667	16.32666667	16.28444444	15.85555556	16.08777778	16.18666667	16.55111111	16.44777778	16.40777778	16.56444444	16.48222222	16.67777778	16.67111111	16.68333333	16.84333333	16.69888889	16.85555556	16.79	16.98222222	16.86777778	16.96444444	16.75555556	16.66888889	16.61111111	16.51666667	16.63444444	16.87555556	16.01888889	16.15777778	16.28888889	16.56444444	15.21	15.81777778	14.87333333	15.14111111
8/11/2019 12:01:15	-118.5154934	42.54353282	1239.525452	-118.5154764	42.54352162	1233.896706	-118.5154555	42.54351413	1231.767903	8/11/2019 12:02:14	15.43222222	15.24555556	14.66777778	14.67444444	14.38555556	14.04444444	14.04333333	13.70333333	13.88555556	14.02777778	14.43333333	14.19555556	14.19111111	14.38666667	14.34555556	14.52333333	14.60555556	14.75333333	14.78444444	14.61444444	14.88444444	14.85555556	15.02555556	15.02666667	15.03666667	15.05222222	14.82444444	14.80222222	14.62	14.69666667	14.89111111	14.21666667	14.06333333	14.38444444	14.58111111	13.35444444	13.94333333	13.07333333	12.94333333
8/11/2019 12:01:16	-118.515471	42.54352564	1239.558	-118.5154541	42.54351432	1233.89186	-118.5154355	42.54350994	1231.9252	8/11/2019 12:02:15	17.19666667	17.10444444	16.99888889	17.09888889	17.00222222	16.73111111	16.52111111	16.19111111	16.33777778	16.51888889	16.81333333	16.50222222	16.53111111	16.69555556	16.61333333	16.66	16.54888889	16.64111111	16.72888889	16.41222222	16.60555556	16.52111111	16.69333333	16.61888889	16.53777778	16.64222222	16.41111111	16.31	16.30666667	16.38111111	16.61222222	16.04777778	15.92777778	15.89777778	16.24777778	15.52	15.98666667	15.27888889	15.31555556
8/11/2019 12:01:17	-118.5154482	42.54351853	1239.548774	-118.5154315	42.54350704	1233.863971	-118.5154144	42.54350597	1232.059871	8/11/2019 12:02:16	15.865	15.741	15.841	16.056	15.934	15.752	15.717	15.214	15.409	15.395	15.833	15.505	15.428	15.494	15.194	15.425	15.295	15.269	15.259	15.042	15.023	14.968	15.184	15.163	15.128	15.19	14.958	14.982	15.023	15.266	15.512	14.961	15.009	15.359	15.578	14.564	15.324	14.64	15.108
8/11/2019 12:01:18	-118.5154247	42.54351133	1239.527613	-118.5154083	42.54349963	1233.854123	-118.5153911	42.54350128	1232.369516	8/11/2019 12:02:17	14.50777778	14.22444444	14.22	14.73111111	14.46555556	14.29666667	14.15888889	13.76	14.04111111	13.97	14.29777778	13.94444444	13.90444444	13.93	13.76111111	13.93777778	13.78111111	13.74333333	13.77222222	13.40888889	13.58	13.56444444	13.64555556	13.61777778	13.66777778	13.69666667	13.47555556	13.43111111	13.53	13.59666667	13.94333333	13.37333333	13.46222222	13.87555556	14.04333333	13.48	14.21777778	13.68555556	13.87444444
8/11/2019 12:01:19	-118.5154014	42.54350398	1239.546581	-118.5153848	42.54349189	1233.914013	-118.5153782	42.54350113	1232.602419	8/11/2019 12:02:18	16.09111111	15.88777778	15.76222222	16.14444444	16.06111111	15.79333333	15.69555556	15.32222222	15.45222222	15.46111111	15.87222222	15.48666667	15.42222222	15.60333333	15.43	15.44555556	15.33666667	15.20666667	15.39333333	15.00333333	15.12333333	15.03	15.18555556	15.12222222	15.16777778	15.18888889	14.97777778	15.03888889	14.93333333	15.11888889	15.43111111	14.94222222	14.76	14.91888889	15.59444444	14.62777778	15.62888889	14.96444444	15.16666667
8/11/2019 12:01:20	-118.5153778	42.54349601	1239.597161	-118.5153608	42.54348395	1233.964452	-118.5153614	42.54348726	1232.520032	8/11/2019 12:02:19	17.20333333	17.00222222	17.01333333	17.11444444	16.94444444	16.83777778	16.78444444	16.38666667	16.41777778	16.54777778	16.87222222	16.52555556	16.52111111	16.62222222	16.41222222	16.52333333	16.43777778	16.34555556	16.40111111	16.11	16.16777778	16.14666667	16.20222222	16.20444444	16.25777778	16.22888889	16.07888889	16.08555556	16.05333333	16.22777778	16.46333333	15.91666667	15.94222222	16.12	16.11777778	15.63444444	16.38333333	15.73	15.90222222
8/11/2019 12:01:21	-118.5153545	42.54348832	1239.5906	-118.5153385	42.54347682	1233.9602	-118.515343	42.54347676	1232.3834	8/11/2019 12:02:20	18.39111111	18.23111111	18.18222222	18.45777778	18.21777778	17.96333333	17.89555556	17.55555556	17.67333333	17.61	18.12222222	17.82111111	17.73333333	17.85222222	17.63666667	17.84555556	17.65111111	17.67	17.71555556	17.35111111	17.55	17.47777778	17.62111111	17.55111111	17.61555556	17.59222222	17.34888889	17.30111111	17.35666667	17.49222222	17.77777778	17.17444444	17.07777778	17.26777778	17.65222222	16.55333333	17.19111111	16.74666667	16.77555556
8/11/2019 12:01:22	-118.5153315	42.54348065	1239.562968	-118.5153144	42.54346901	1233.940252	-118.5153241	42.54346773	1232.445097	8/11/2019 12:02:21	18.40111111	18.03	17.85888889	18.14666667	17.82111111	17.68333333	17.59	17.11	17.33777778	17.41666667	17.73111111	17.52333333	17.54222222	17.59666667	17.44444444	17.58111111	17.50222222	17.56222222	17.58777778	17.29555556	17.43	17.35888889	17.47666667	17.30111111	17.41111111	17.34333333	17.28111111	17.26111111	17.25333333	17.36333333	17.63888889	17.08777778	16.93555556	17.10777778	17.48222222	16.45555556	17.18111111	16.39555556	16.39444444
8/11/2019 12:01:23	-118.5153089	42.54347254	1239.524742	-118.5152916	42.54346114	1233.934668	-118.515323	42.54344549	1232.587935	8/11/2019 12:02:22	17.59666667	17.40666667	17.41222222	17.51555556	17.35222222	17.1	16.87666667	16.61444444	16.80555556	16.74	17.16222222	16.94111111	16.95	17.09	16.88333333	17.04333333	16.98111111	16.88666667	17.04666667	16.85666667	16.88777778	16.74444444	16.94777778	16.84555556	16.87444444	16.90555556	16.68333333	16.70555556	16.66	16.78	17.00666667	16.45555556	16.42111111	16.74222222	16.90555556	16.03555556	16.31333333	15.92666667	15.93666667
8/11/2019 12:01:24	-118.5152862	42.54346487	1239.479871	-118.5152689	42.54345378	1233.941729	-118.5153107	42.54343042	1232.67729	8/11/2019 12:02:23	17.64111111	17.29333333	17.19555556	17.38666667	17.13222222	16.88777778	16.79	16.43888889	16.60444444	16.68666667	17.01555556	16.71555556	16.78666667	16.88444444	16.62333333	16.85888889	16.72555556	16.76111111	16.78555556	16.40777778	16.64444444	16.55555556	16.69333333	16.67111111	16.62222222	16.75	16.42333333	16.42444444	16.35666667	16.54444444	16.82222222	16.25333333	16.14222222	16.33777778	16.84555556	15.65222222	16.5	15.73333333	15.61333333
8/11/2019 12:01:25	-118.5152642	42.5434575	1239.42	-118.5152468	42.54344675	1233.955713	-118.5152912	42.54342056	1232.789633	8/11/2019 12:02:24	18.04	17.89111111	17.80555556	17.97222222	17.90444444	17.62777778	17.50666667	17.14777778	17.27111111	17.41666667	17.62111111	17.32111111	17.34777778	17.37444444	17.27333333	17.45666667	17.31222222	17.28555556	17.34444444	17.04	17.09333333	16.98	17.16444444	17.11888889	17.13	17.07666667	16.73	16.79777778	16.80333333	16.98	17.16888889	16.68888889	16.69	16.87	17.07111111	16.56777778	17.00222222	16.48777778	16.53
8/11/2019 12:01:26	-118.515242	42.54345021	1239.390194	-118.5152243	42.54343966	1233.965226	-118.5152634	42.54342202	1233.045677	8/11/2019 12:02:25	17.466	17.385	17.243	17.393	17.003	16.984	16.868	16.537	16.714	16.739	17.157	16.777	16.843	16.829	16.701	16.932	16.767	16.751	16.751	16.501	16.626	16.465	16.604	16.534	16.654	16.559	16.287	16.336	16.315	16.532	16.686	16.123	16.152	16.371	16.482	15.76	16.318	15.634	15.716
8/11/2019 12:01:27	-118.5152199	42.54344309	1239.340516	-118.5152016	42.54343272	1233.945652	-118.5152468	42.54343161	1233.298613	8/11/2019 12:02:26	16.68555556	16.55111111	16.45333333	16.46888889	16.34666667	16.12777778	16.05222222	15.71222222	15.77222222	15.84888889	16.28444444	15.86111111	16.00666667	16.08111111	15.95777778	16.09111111	16.10111111	15.98777778	15.99111111	15.78444444	15.90555556	15.85444444	15.98555556	15.96444444	16.00111111	15.94	15.69444444	15.70111111	15.63666667	15.68222222	16.15	15.49111111	15.47	15.60222222	15.99888889	14.96888889	15.79222222	14.93555556	15.09333333
8/11/2019 12:01:28	-118.5151972	42.54343555	1239.289581	-118.5151788	42.54342552	1233.912258	-118.5152264	42.54341907	1233.379516	8/11/2019 12:02:27	14.96333333	15.02555556	14.73444444	14.92444444	14.56	14.40888889	14.48111111	13.92444444	14.27111111	14.27666667	14.62111111	14.22333333	14.34111111	14.54777778	14.26333333	14.48111111	14.50222222	14.43	14.51333333	14.26777778	14.49777778	14.33111111	14.52888889	14.42777778	14.36333333	14.49333333	14.27222222	14.26111111	14.15	14.27222222	14.51	13.95555556	13.97444444	14.30111111	14.55777778	13.38222222	14.21555556	13.30666667	13.71444444
8/11/2019 12:01:29	-118.5151745	42.54342809	1239.251581	-118.5151561	42.54341827	1233.883323	-118.5151877	42.54339325	1233.344935	8/11/2019 12:02:28	10.02555556	9.852222222	9.733333333	10.03888889	9.693333333	9.521111111	9.425555556	9.097777778	9.32	9.247777778	9.535555556	9.313333333	9.393333333	9.496666667	9.326666667	9.386666667	9.505555556	9.42	9.537777778	9.286666667	9.55	9.497777778	9.64	9.538888889	9.534444444	9.614444444	9.436666667	9.504444444	9.463333333	9.47	9.874444444	9.25	9.191111111	9.886666667	9.971111111	9.031111111	9.985555556	9.114444444	9.252222222
8/11/2019 12:01:30	-118.5151526	42.5434207	1239.2208	-118.5151344	42.54341083	1233.88748	-118.5151425	42.54339616	1233.1138	8/11/2019 12:02:29	11.51111111	11.20666667	11.28555556	11.53555556	11.29444444	11.18555556	11.14666667	10.65666667	10.82777778	10.82777778	11.22888889	10.88111111	10.85444444	11.03666667	10.84666667	11.02888889	10.87555556	10.9	10.78777778	10.56333333	10.76888889	10.80444444	10.92555556	10.75444444	10.71555556	10.87333333	10.58555556	10.63777778	10.66333333	10.72777778	11.04222222	10.47444444	10.29888889	10.42555556	11.06	10.42222222	10.81444444	10.35111111	10.34
8/11/2019 12:01:31	-118.5151333	42.54341406	1239.18208	-118.5151154	42.54340418	1233.893996	-118.5151173	42.54339764	1232.7774	8/11/2019 12:02:30	13.40888889	13.31111111	12.98777778	13.56888889	13.42222222	13.21222222	13.10111111	12.73222222	12.88888889	12.87333333	13.31222222	12.92444444	12.88666667	12.95666667	12.81111111	12.87	12.73555556	12.70555556	12.63444444	12.42555556	12.42888889	12.40444444	12.63	12.45888889	12.39555556	12.47777778	12.27333333	12.23444444	12.17666667	12.30444444	12.60111111	11.95333333	11.98	12.37777778	12.61222222	11.86666667	12.59333333	11.90666667	12.23
8/11/2019 12:01:32	-118.5151115	42.54340719	1239.12973	-118.5150939	42.54339723	1233.905051	-118.515089	42.54339259	1232.467676	8/11/2019 12:02:31	13.26333333	13.20333333	13.13333333	13.35666667	13.37	13.14444444	13.02	12.67333333	12.86	12.95888889	13.28444444	12.86111111	12.89888889	13.00666667	12.66444444	12.91	12.67777778	12.70666667	12.66666667	12.42444444	12.51333333	12.43444444	12.49888889	12.44777778	12.50777778	12.55666667	12.22111111	12.35	12.25	12.45333333	12.67666667	12.19	12.03111111	12.49888889	12.53555556	11.73333333	12.67888889	12.08777778	12.33
8/11/2019 12:01:33	-118.5150873	42.54339988	1239.035613	-118.5150702	42.5433899	1233.914452	-118.5150634	42.54338434	1232.228258	8/11/2019 12:02:32	12.49666667	12.71555556	12.73111111	12.77111111	12.83777778	12.69	12.54111111	12.27555556	12.37666667	12.51333333	12.78	12.37666667	12.4	12.50555556	12.29111111	12.36444444	12.23111111	12.19444444	12.26888889	11.90888889	12.03444444	11.85	12.05444444	11.95333333	11.96666667	12.02222222	11.71444444	11.82111111	11.76666667	11.86555556	12.17777778	11.70222222	11.64333333	11.68444444	12.38777778	11.12888889	12.14222222	11.63888889	11.89
8/11/2019 12:01:34	-118.5150657	42.54339287	1238.999355	-118.5150488	42.54338278	1233.949826	-118.5150603	42.54339137	1232.012161	8/11/2019 12:02:33	12.275	12.309	12.28	12.678	12.541	12.318	12.247	11.792	12.08	12.058	12.371	12.022	12.004	12.076	11.896	11.963	11.856	11.75	11.895	11.416	11.587	11.493	11.578	11.529	11.567	11.63	11.378	11.367	11.333	11.58	11.75	11.36	11.286	11.456	11.745	11.165	11.814	11.387	11.598
8/11/2019 12:01:35	-118.5150447	42.54338594	1239.0042	-118.515028	42.54337584	1233.96186	-118.5150398	42.54340068	1232.023	8/11/2019 12:02:34	12.44777778	12.43666667	12.32	12.71	12.61666667	12.40888889	12.30555556	11.94444444	12.16111111	12.18	12.49333333	12.10555556	12.11888889	12.33888889	12.05555556	12.10444444	11.97777778	11.89	11.98222222	11.63666667	11.69555556	11.70888889	11.66111111	11.71555556	11.66	11.71777778	11.44555556	11.51444444	11.49	11.64555556	11.97444444	11.33555556	11.32222222	11.47	11.82222222	11.26444444	11.72222222	11.35111111	11.71555556
8/11/2019 12:01:36	-118.5150229	42.54337856	1239.004774	-118.515009	42.54336954	1233.94091	-118.5150105	42.54339639	1232.190387	8/11/2019 12:02:35	13.81222222	13.91444444	13.59111111	14.03888889	13.98444444	13.72888889	13.60111111	13.38333333	13.60777778	13.57111111	13.89777778	13.53111111	13.49444444	13.61333333	13.41222222	13.52666667	13.48222222	13.35777778	13.29888889	13.04222222	13.10777778	13.07111111	13.13888889	13.12555556	13.03	13.08888889	12.86777778	12.89222222	12.85	12.95444444	13.28	12.60111111	12.65222222	12.78333333	13.04	12.37222222	13.17666667	12.82666667	12.97777778
8/11/2019 12:01:37	-118.5149993	42.54337054	1238.993613	-118.5149825	42.54336065	1233.906613	-118.5149808	42.54338225	1232.544226	8/11/2019 12:02:36	14.50666667	14.44333333	14.36444444	14.73888889	14.69444444	14.55888889	14.34888889	14.05666667	14.22444444	14.35222222	14.60333333	14.36666667	14.34444444	14.39555556	14.15888889	14.27222222	14.14555556	14.05444444	14.11	13.72555556	13.88777778	13.79333333	13.97444444	13.83666667	13.79222222	13.91444444	13.53222222	13.54888889	13.48333333	13.57888889	13.95555556	13.38888889	13.36666667	13.16666667	13.39111111	12.88111111	13.74888889	13.23444444	13.24444444
8/11/2019 12:01:38	-118.514975	42.54336252	1238.946871	-118.5149583	42.54335243	1233.872758	-118.5149745	42.54336537	1232.513581	8/11/2019 12:02:37	14.20111111	14.40444444	14.24333333	14.56111111	14.61111111	14.40555556	14.17777778	13.77222222	14.08666667	14.12777778	14.56	14.15111111	14.12111111	14.15111111	13.95222222	14.09777778	13.89444444	13.93888889	13.83	13.54	13.67777778	13.63888889	13.73555556	13.59111111	13.67777778	13.65555556	13.41777778	13.38666667	13.30333333	13.36	13.63222222	13.19777778	12.99888889	13.17555556	13.37444444	12.39666667	13.20777778	12.89	13.09111111
8/11/2019 12:01:39	-118.5149515	42.54335476	1238.9354	-118.5149346	42.54334447	1233.86116	-118.514945	42.54334052	1232.342	8/11/2019 12:02:38	14.05666667	14.12111111	13.94777778	14.37666667	14.33	14.09666667	14.01	13.69666667	13.88111111	13.95777778	14.32333333	13.92333333	13.96444444	13.95333333	13.74777778	13.91444444	13.71555556	13.70555556	13.79	13.39222222	13.47333333	13.41	13.47666667	13.41777778	13.44777778	13.40666667	13.19	13.16888889	13.01666667	13.23777778	13.52111111	12.94555556	12.75666667	12.99333333	13.35666667	12.39888889	13.25444444	12.83333333	12.87
8/11/2019 12:01:40	-118.5149281	42.54334675	1238.900742	-118.5149114	42.54333645	1233.807777	-118.5149109	42.5433235	1232.251387	8/11/2019 12:02:39	14.09555556	14.02777778	14.08555556	14.50222222	14.32333333	14.25111111	14.10666667	13.74888889	14.04	13.93777778	14.30333333	14.02111111	14.00555556	14.07333333	13.88666667	13.97	13.80444444	13.79222222	13.85111111	13.43555556	13.50333333	13.43111111	13.6	13.51888889	13.50444444	13.51111111	13.22444444	13.33777778	13.22333333	13.41777778	13.66	12.95444444	12.97111111	13.11222222	13.20444444	12.56111111	13.16111111	12.78	13.05666667
8/11/2019 12:01:41	-118.5149043	42.54333758	1238.856387	-118.5148884	42.54332771	1233.777258	-118.5148985	42.54332703	1232.202581	8/11/2019 12:02:40	14.13111111	14.31222222	14.06888889	14.46	14.52555556	14.33222222	14.37777778	13.84444444	14.1	14.22777778	14.64	14.26555556	14.18666667	14.33555556	14.10666667	14.17777778	14.06777778	14.01111111	13.97333333	13.73333333	13.80333333	13.69666667	13.91777778	13.83666667	13.76555556	13.77666667	13.53555556	13.44222222	13.45777778	13.59222222	13.96666667	13.37111111	13.12888889	13.21888889	13.47	12.60888889	13.52	13.20111111	13.19666667
8/11/2019 12:01:42	-118.5148778	42.54332808	1238.852323	-118.5148609	42.54331786	1233.836016	-118.5148823	42.54332929	1232.209226	8/11/2019 12:02:41	14.53888889	14.49555556	14.69666667	14.96222222	14.98	14.76333333	14.67	14.24666667	14.45666667	14.56	14.97444444	14.52888889	14.54666667	14.60888889	14.50666667	14.59222222	14.41777778	14.34222222	14.40888889	14.02333333	14.2	14.11333333	14.24222222	14.16444444	14.11222222	14.22444444	13.88333333	13.95	13.83666667	14.09222222	14.29888889	13.62222222	13.60888889	13.65	13.76	12.95444444	13.79222222	13.44555556	13.59111111
8/11/2019 12:01:43	-118.5148494	42.54331892	1238.931968	-118.5148325	42.5433087	1233.926319	-118.5148429	42.5433132	1232.329065	8/11/2019 12:02:42	15.41222222	15.28333333	15.45111111	15.73333333	15.60777778	15.36333333	15.35333333	15.01111111	15.16222222	15.25222222	15.66555556	15.27444444	15.29888889	15.41111111	15.1	15.28777778	15.17666667	15.11333333	15.14222222	14.78666667	14.80666667	14.86	14.94111111	14.86666667	14.87333333	14.79666667	14.65222222	14.60333333	14.55333333	14.69777778	14.99333333	14.44777778	14.28	14.41444444	14.57333333	13.84888889	14.33888889	14.25777778	14.35222222
8/11/2019 12:01:44	-118.5148217	42.54330966	1239.0242	-118.5148048	42.54329943	1233.9883	-118.5148129	42.543302	1232.4566	8/11/2019 12:02:43	15.968	15.803	15.831	16.146	16.22	15.887	15.946	15.548	15.764	15.815	16.158	15.823	15.858	15.963	15.694	15.834	15.777	15.724	15.767	15.432	15.51	15.383	15.567	15.476	15.577	15.47	15.295	15.349	15.298	15.516	15.61	15.123	15.046	15.09	15.386	14.462	15.274	14.886	15.107
8/11/2019 12:01:45	-118.5147928	42.54330034	1239.02629	-118.5147758	42.54328996	1233.963603	-118.5147796	42.54328615	1232.440161	8/11/2019 12:02:44	15.32444444	15.27	15.37	15.83666667	15.66888889	15.50222222	15.39666667	15.02222222	15.18333333	15.33555556	15.73444444	15.32666667	15.25111111	15.44555556	15.15777778	15.39	15.25777778	15.17111111	15.13333333	14.87	15.02333333	14.88333333	15.01888889	14.92555556	14.90555556	14.96111111	14.61111111	14.68	14.71	14.78111111	15.07333333	14.45333333	14.28	14.42111111	14.64333333	13.67555556	14.55444444	14.23888889	14.44666667
8/11/2019 12:01:46	-118.5147627	42.54329088	1239.045161	-118.514746	42.54328052	1233.9624	-118.5147459	42.54327069	1232.414032	8/11/2019 12:02:45	17.17111111	17.16222222	17.06666667	17.48222222	17.59111111	17.38333333	17.19333333	16.98	17.16	17.32666667	17.61333333	17.35555556	17.19222222	17.34111111	17.12333333	17.31444444	17.10111111	17.06111111	17.13444444	16.81111111	16.89	16.81555556	16.96777778	16.87888889	16.89222222	16.82444444	16.70111111	16.66666667	16.56666667	16.74888889	17.01	16.37444444	16.24555556	16.21111111	16.23888889	15.57	16.37666667	16.06666667	16.06444444
8/11/2019 12:01:47	-118.5147327	42.54328146	1239.092258	-118.5147162	42.54327117	1233.994419	-118.5147171	42.54325805	1232.384484	8/11/2019 12:02:46	18.98222222	19.27333333	18.97444444	19.44444444	19.51777778	19.45555556	19.28111111	18.97111111	19.18444444	19.35777778	19.69555556	19.39555556	19.37111111	19.45555556	19.15444444	19.38555556	19.30333333	19.20777778	19.27888889	18.91333333	19.01111111	18.98777778	19.07111111	18.96555556	19.09222222	19.04888889	18.84333333	18.7	18.65	18.85777778	19.10333333	18.58222222	18.37777778	18.24111111	18.08111111	17.30666667	18.33	18.05333333	18.29
8/11/2019 12:01:48	-118.5147027	42.54327182	1239.1296	-118.5146863	42.54326155	1234.015027	-118.5146877	42.54324699	1232.411367	8/11/2019 12:02:47	17.77222222	17.97333333	17.77111111	18.13888889	18.30555556	18.21111111	18.18333333	17.74666667	18.04333333	18.05777778	18.51888889	18.13888889	18.19222222	18.21555556	18.02333333	18.12555556	18.02	17.96666667	17.96888889	17.64	17.82888889	17.71444444	17.80888889	17.77888889	17.86666667	17.81888889	17.58	17.62444444	17.51666667	17.69777778	18.00666667	17.46666667	17.30222222	17.23222222	17.05222222	16.42333333	17.22888889	16.97222222	17.14888889
8/11/2019 12:01:49	-118.5146734	42.54326216	1239.115161	-118.5146567	42.54325195	1233.989132	-118.5146837	42.54325188	1232.415452	8/11/2019 12:02:48	17.40777778	17.52666667	17.3	17.69	17.63111111	17.58555556	17.53888889	17.09444444	17.36666667	17.34111111	17.77444444	17.46888889	17.47555556	17.52666667	17.31555556	17.48777778	17.38888889	17.31111111	17.35333333	17.07222222	17.16	17.04333333	17.16444444	17.22111111	17.06	17.17111111	16.89777778	16.91	16.93333333	17.06777778	17.13777778	16.73666667	16.42333333	16.46444444	16.55666667	15.88777778	16.57	16.32666667	16.58777778
8/11/2019 12:01:50	-118.5146449	42.5432528	1239.038355	-118.5146277	42.54324239	1233.934303	-118.5146604	42.54324638	1232.30671	8/11/2019 12:02:49	15.82333333	16.19777778	15.84222222	16.25111111	16.20666667	16.11111111	16.00777778	15.62	15.94333333	15.94888889	16.34111111	15.95333333	15.94	16.04333333	15.84	16.02777778	15.96	15.84666667	15.86444444	15.58666667	15.74666667	15.62888889	15.66111111	15.58444444	15.62888889	15.70111111	15.40444444	15.41222222	15.44666667	15.47333333	15.73555556	15.18	15.03555556	15.02111111	15.27777778	14.30666667	15.20888889	14.95777778	15.06666667
8/11/2019 12:01:51	-118.5146171	42.54324364	1239.005484	-118.5145993	42.54323304	1233.916335	-118.5146172	42.54323178	1232.358452	8/11/2019 12:02:50	15.35	15.29555556	15.30666667	15.73888889	15.53777778	15.54444444	15.43444444	15.06222222	15.29111111	15.37333333	15.74444444	15.38111111	15.40666667	15.57222222	15.28444444	15.47	15.18777778	15.23666667	15.22666667	14.98777778	15.06222222	14.90666667	15.06888889	15.02666667	15.00222222	14.98111111	14.77777778	14.68666667	14.75	14.84222222	15.14777778	14.51444444	14.4	14.56666667	14.66	13.88	14.58444444	14.2	14.51333333
8/11/2019 12:01:52	-118.5145891	42.5432345	1239.016516	-118.5145715	42.54322401	1233.924284	-118.514577	42.54322054	1232.581581	8/11/2019 12:02:51	15.628	15.627	15.517	15.916	15.899	15.776	15.752	15.289	15.564	15.525	16.038	15.699	15.621	15.818	15.514	15.72	15.583	15.532	15.489	15.272	15.328	15.171	15.288	15.237	15.295	15.283	15.062	15.121	15.04	15.156	15.523	14.789	14.785	14.735	14.822	13.955	14.924	14.482	14.586
8/11/2019 12:01:53	-118.5145624	42.54322575	1239.011323	-118.5145446	42.54321518	1233.901952	-118.5145493	42.54321119	1232.714742	8/11/2019 12:02:52	14.82444444	14.79	14.75555556	15.1	15.06333333	14.84	14.89444444	14.46555556	14.79111111	14.67333333	15.06666667	14.79222222	14.74111111	14.87888889	14.63666667	14.74777778	14.65222222	14.63	14.69777778	14.30333333	14.36555556	14.30777778	14.42888889	14.30444444	14.29444444	14.40888889	14.12888889	14.20555556	14.18333333	14.21666667	14.58444444	13.95555556	13.82222222	13.95222222	14.06777778	13.35777778	13.94222222	13.74555556	13.80888889
8/11/2019 12:01:54	-118.5145369	42.5432173	1238.981	-118.5145195	42.54320665	1233.8539	-118.5145303	42.54320338	1232.7364	8/11/2019 12:02:53	15.24444444	15.11222222	15.07444444	15.35222222	15.31666667	15.18222222	15.09888889	14.70444444	14.87	14.93444444	15.28333333	14.97333333	14.93666667	15.00222222	14.83888889	14.95444444	14.85666667	14.79222222	14.84888889	14.47444444	14.60222222	14.46	14.63	14.57111111	14.60555556	14.52333333	14.32	14.27666667	14.33333333	14.44888889	14.78	14.14777778	13.88222222	14.03444444	14.24888889	13.57	14.28	13.85111111	14.13888889
8/11/2019 12:01:55	-118.5145123	42.54320903	1238.970935	-118.5144948	42.54319831	1233.793423	-118.5145205	42.5431976	1232.643097	8/11/2019 12:02:54	15.49333333	15.51	15.39333333	15.83444444	15.86	15.78111111	15.79111111	15.29444444	15.43888889	15.62222222	15.87888889	15.54111111	15.51777778	15.57777778	15.48444444	15.55555556	15.36333333	15.39555556	15.42222222	15.15666667	15.28	15.14444444	15.27777778	15.14	15.14888889	15.12666667	15.09333333	14.92222222	14.93666667	15.00111111	15.33777778	14.73222222	14.59111111	14.48444444	14.61555556	13.81555556	14.64111111	14.57444444	14.68666667
8/11/2019 12:01:56	-118.5144871	42.5432004	1238.986806	-118.5144705	42.54318997	1233.799003	-118.514491	42.54318803	1232.687871	8/11/2019 12:02:55	15.91111111	15.90333333	15.87444444	16.17555556	16.09	16.00444444	15.89666667	15.57555556	15.83	15.87666667	16.26555556	15.98	15.93111111	16.00666667	15.80555556	15.84888889	15.82222222	15.84111111	15.73777778	15.49666667	15.52333333	15.48222222	15.61555556	15.57555556	15.57666667	15.58222222	15.32333333	15.32555556	15.32	15.44888889	15.70333333	15.09666667	14.94666667	15.09222222	15.08777778	14.22555556	15.01444444	14.92444444	14.98
8/11/2019 12:01:57	-118.5144619	42.54319161	1239.067645	-118.5144443	42.54318071	1233.851848	-118.5144572	42.54317545	1232.866032	8/11/2019 12:02:56	15.69222222	15.52888889	15.73	15.95555556	15.95	15.87666667	15.77111111	15.42222222	15.64	15.68666667	16.10555556	15.68777778	15.71333333	15.88333333	15.56666667	15.70888889	15.60888889	15.51222222	15.66111111	15.32111111	15.37555556	15.35777778	15.56222222	15.41888889	15.40222222	15.39333333	15.21222222	15.22222222	15.15	15.24888889	15.49666667	15.00555556	14.84888889	14.95333333	15.02777778	14.24	15.06111111	14.82444444	14.73333333
8/11/2019 12:01:58	-118.514438	42.54318338	1239.134	-118.5144202	42.54317236	1233.878857	-118.5144374	42.54316637	1232.961033	8/11/2019 12:02:57	15.59222222	15.28222222	15.46333333	15.84555556	15.74777778	15.52666667	15.60222222	15.10333333	15.48777778	15.51666667	15.86222222	15.55333333	15.37	15.65333333	15.39777778	15.57222222	15.51111111	15.37555556	15.38777778	15.12	15.23888889	15.17333333	15.28333333	15.19111111	15.18888889	15.19777778	14.94777778	14.94777778	14.93666667	15.03222222	15.28333333	14.74333333	14.50777778	14.91	14.83111111	14.09333333	14.62555556	14.39111111	14.62
8/11/2019 12:01:59	-118.5144147	42.54317566	1239.14329	-118.5143967	42.54316443	1233.877448	-118.5144106	42.54315871	1233.010226	8/11/2019 12:02:58	15.35444444	15.08111111	15.30111111	15.62666667	15.58	15.39666667	15.35666667	14.94	15.23	15.29666667	15.68666667	15.26777778	15.25444444	15.38777778	15.30444444	15.29333333	15.28111111	15.24	15.22777778	14.86888889	15.01333333	14.91666667	15.05333333	14.98555556	14.92111111	14.93666667	14.80777778	14.63222222	14.72333333	14.81	15.00333333	14.45111111	14.35888889	14.41333333	14.71	13.90444444	14.54777778	14.25777778	14.35222222
8/11/2019 12:02:00	-118.5143912	42.54316806	1239.120839	-118.5143734	42.5431566	1233.860365	-118.5143795	42.54315079	1233.076742	8/11/2019 12:02:59	15.43888889	15.34666667	15.53222222	15.82333333	15.75222222	15.72666667	15.57888889	15.14	15.49666667	15.52222222	15.86333333	15.59	15.51444444	15.55555556	15.33666667	15.53888889	15.39222222	15.34	15.38222222	15.02	15.04444444	15.04222222	15.21666667	15.08888889	15.19333333	15.11222222	14.90777778	14.90333333	14.86	15.04333333	15.30111111	14.76	14.38666667	14.65222222	14.79777778	13.84777778	14.57111111	14.27555556	14.48
8/11/2019 12:02:01	-118.5143678	42.54316068	1239.115806	-118.5143499	42.54314883	1233.865458	-118.5143645	42.54315409	1233.255871	8/11/2019 12:03:00	15.916	15.911	15.978	16.163	16.169	15.988	15.969	15.528	15.861	15.908	16.295	15.958	16.018	16.112	15.87	15.993	15.845	15.784	15.947	15.693	15.69	15.568	15.683	15.589	15.626	15.721	15.445	15.453	15.319	15.504	15.772	15.133	15.017	15.082	15.162	14.27	15.149	14.823	15.024
8/11/2019 12:02:02	-118.5143444	42.54315334	1239.1464	-118.5143264	42.54314126	1233.93922	-118.5143448	42.54315084	1233.4828	8/11/2019 12:03:01	15.32444444	15.60333333	15.40555556	15.74444444	15.74222222	15.44	15.53444444	15.13222222	15.47111111	15.42111111	15.88111111	15.50444444	15.41888889	15.59222222	15.29555556	15.40888889	15.40111111	15.34222222	15.38777778	15.04333333	15.24333333	15.06	15.27555556	15.15666667	15.18888889	15.17111111	14.93555556	14.88444444	14.87	14.98	15.29444444	14.67777778	14.53555556	14.77666667	14.48888889	13.99555556	14.88222222	14.4	14.56666667
8/11/2019 12:02:03	-118.5143221	42.54314568	1239.15929	-118.5143041	42.54313365	1233.993503	-118.5143171	42.54313922	1233.699226	8/11/2019 12:03:02	15.39444444	15.25111111	15.46444444	15.69111111	15.59666667	15.57222222	15.40444444	15.03555556	15.23888889	15.31444444	15.75	15.36111111	15.28	15.42	15.25444444	15.34777778	15.26111111	15.17777778	15.20666667	14.90222222	15.05333333	14.92333333	15.03888889	15.04555556	14.91888889	15.00555556	14.88666667	14.79111111	14.66	14.95333333	15.08444444	14.66222222	14.37888889	14.54666667	14.64333333	13.66111111	14.55555556	14.27111111	14.42
8/11/2019 12:02:04	-118.5142988	42.54313783	1239.158387	-118.5142804	42.54312577	1234.004835	-118.5142933	42.54313139	1233.919935	8/11/2019 12:03:03	15.88111111	15.70111111	15.83666667	15.99555556	16.12555556	15.88333333	15.88888889	15.47666667	15.70222222	15.83	16.19111111	15.82666667	15.84111111	16.01222222	15.78333333	15.83888889	15.80888889	15.71888889	15.74	15.44444444	15.5	15.43222222	15.6	15.48666667	15.55888889	15.53222222	15.32333333	15.35333333	15.31333333	15.46111111	15.70555556	15.06333333	14.97555556	15.17	15.01222222	14.30666667	15.10777778	14.94777778	14.96666667
8/11/2019 12:02:05	-118.5142736	42.54312894	1239.164548	-118.5142551	42.54311705	1233.989132	-118.5142663	42.54312151	1234.069194	8/11/2019 12:03:04	16.63777778	16.61222222	16.56777778	16.99777778	16.90777778	16.74444444	16.64555556	16.4	16.57666667	16.56111111	17.00666667	16.60777778	16.68	16.73	16.56888889	16.69666667	16.55444444	16.55666667	16.58111111	16.29888889	16.37555556	16.29888889	16.41777778	16.42	16.44444444	16.41888889	16.26222222	16.22666667	16.16333333	16.40888889	16.55111111	15.97666667	15.66111111	15.76333333	15.82666667	15.35444444	16.05	15.83555556	15.82333333
8/11/2019 12:02:06	-118.5142472	42.54311948	1239.113516	-118.5142287	42.54310787	1233.922658	-118.5142406	42.54311264	1234.168452	8/11/2019 12:03:05	19.98888889	19.8	20.07111111	20.32555556	20.29444444	20.27555556	20.19	19.75888889	20.05666667	20.09333333	20.49666667	20.22	20.18444444	20.31444444	20.08111111	20.15	20.10666667	20.02555556	20.18444444	19.78222222	19.92444444	19.79222222	19.96111111	19.98777778	19.95	19.95111111	19.77666667	19.69777778	19.7	19.86444444	20.16222222	19.64888889	19.47888889	19.40777778	19.41	18.69888889	19.14666667	19.18111111	19.13777778
8/11/2019 12:02:07	-118.5142211	42.54311048	1239.059677	-118.5142024	42.5430989	1233.871639	-118.5142207	42.54310559	1234.168613	8/11/2019 12:03:06	20.31222222	20.28777778	20.30666667	20.70777778	20.75333333	20.63	20.54888889	20.22333333	20.40555556	20.48555556	20.94444444	20.66	20.58222222	20.67	20.46888889	20.60333333	20.54222222	20.52444444	20.55222222	20.23666667	20.44	20.28111111	20.49888889	20.39333333	20.42444444	20.45111111	20.11888889	20.22555556	20.15	20.28111111	20.47444444	19.96222222	19.84	19.72555556	19.53777778	19.06111111	19.51222222	19.62444444	19.56
8/11/2019 12:02:08	-118.5141957	42.54310202	1239.003	-118.5141766	42.54309026	1233.86082	-118.5141967	42.54309642	1234.1154	8/11/2019 12:03:07	21.89777778	21.83222222	21.84888889	22.23333333	22.25777778	22.11444444	22.09222222	21.70777778	22.03555556	22.09222222	22.48	22.19666667	22.24222222	22.31555556	22.06	22.19555556	22.11111111	22.06777778	22	21.78777778	21.86111111	21.82333333	21.92	21.81666667	21.83777778	21.90333333	21.76666667	21.63	21.62111111	21.72777778	22.08666667	21.51666667	21.38777778	21.18111111	21.18555556	20.33888889	21.07444444	21.06777778	21.07111111
8/11/2019 12:02:09	-118.5141701	42.54309364	1238.928097	-118.5141513	42.54308185	1233.863194	-118.5141688	42.5430861	1234.064613	8/11/2019 12:03:08	21.69666667	21.59222222	21.72111111	22.09888889	22.05888889	21.93333333	21.88222222	21.58111111	21.88	21.85222222	22.37555556	21.98333333	21.96333333	22.00555556	21.93777778	22.02555556	21.83888889	21.85666667	21.92111111	21.62111111	21.73222222	21.58444444	21.81222222	21.72111111	21.66333333	21.70666667	21.53444444	21.45222222	21.42	21.70666667	21.75888889	21.43888889	21.25888889	21.20777778	21.19444444	20.24777778	20.94222222	20.81	21.15777778
8/11/2019 12:02:10	-118.5141439	42.54308472	1238.880097	-118.514125	42.54307285	1233.892265	-118.514136	42.54307298	1234.047452	8/11/2019 12:03:09	16.247	16.263	16.277	16.472	16.559	16.264	16.336	15.962	16.145	16.193	16.644	16.323	16.286	16.421	16.193	16.355	16.208	16.187	16.233	15.876	16.083	15.94	16.067	15.979	16.034	16.039	15.901	15.891	15.877	15.963	16.297	15.726	15.644	15.648	15.834	15.251	15.814	15.374	15.723
8/11/2019 12:02:11	-118.5141163	42.54307536	1238.924	-118.5140975	42.54306332	1233.976152	-118.5140947	42.54305288	1234.040806	8/11/2019 12:03:10	17.12777778	17.26333333	17.21333333	17.43444444	17.55777778	17.34	17.34444444	16.90444444	17.13888889	17.35111111	17.58555556	17.31555556	17.17888889	17.40444444	17.17777778	17.31111111	17.24444444	17.15222222	17.24888889	16.96333333	17.06333333	17.03777778	17.14777778	17.06444444	17.05	17.08555556	16.89222222	16.88333333	16.85333333	17.00888889	17.25555556	16.79333333	16.64777778	16.5	16.72666667	15.90444444	16.53888889	16.45888889	16.61444444
8/11/2019 12:02:12	-118.514089	42.54306578	1238.9828	-118.5140701	42.54305377	1234.02156	-118.5140654	42.54304356	1234.149	8/11/2019 12:03:11	18.93888889	19.06444444	18.94444444	19.35333333	19.34888889	19.19666667	19.06111111	18.76222222	18.99666667	18.99444444	19.45333333	19.01666667	19.12222222	19.24222222	19.07333333	19.23	19.09333333	19.03555556	19.12777778	18.74555556	18.87	18.81333333	18.94222222	18.94777778	18.94888889	18.94777778	18.77444444	18.78444444	18.73	18.87111111	19.22666667	18.69111111	18.32444444	18.21222222	18.26222222	17.80666667	18.43111111	18.51555556	18.45333333
8/11/2019 12:02:13	-118.5140623	42.54305672	1239.020194	-118.5140435	42.54304477	1234.028826	-118.5140348	42.54303618	1234.146935	8/11/2019 12:03:12	19.10777778	19.19111111	19.18333333	19.52444444	19.46666667	19.32	19.40666667	18.83777778	19.23	19.30666667	19.60444444	19.37222222	19.30222222	19.43888889	19.23666667	19.33555556	19.23222222	19.22111111	19.33444444	19.04888889	19.09444444	19.03222222	19.15222222	19.12666667	19.09777778	19.14111111	18.94666667	18.88555556	18.93333333	19.02	19.40777778	18.78555556	18.60555556	18.67444444	18.48333333	17.76555556	18.54777778	18.39222222	18.57444444
8/11/2019 12:02:14	-118.5140365	42.54304768	1239.056323	-118.5140174	42.54303573	1233.997006	-118.5139963	42.5430357	1233.946258	8/11/2019 12:03:13	18.19444444	18.23888889	18.11444444	18.58555556	18.42333333	18.33	18.12111111	17.91222222	18.16666667	18.19777778	18.67666667	18.28	18.20777778	18.39666667	18.19333333	18.31777778	18.24444444	18.14666667	18.23111111	17.94444444	18.04444444	18.01111111	18.06555556	18.14333333	18.05666667	18.07666667	17.82555556	17.86444444	17.90333333	18.08555556	18.19333333	17.70555556	17.46	17.28222222	17.32666667	16.75555556	17.31555556	17.56444444	17.31
8/11/2019 12:02:15	-118.5140119	42.54303874	1239.044613	-118.5139932	42.54302697	1233.943439	-118.5139777	42.54303045	1233.747935	8/11/2019 12:03:14	19.07555556	19.26111111	19.09111111	19.68555556	19.51888889	19.47777778	19.35444444	19.02666667	19.29555556	19.36222222	19.71333333	19.44888889	19.44555556	19.57222222	19.36888889	19.54	19.37888889	19.38444444	19.36666667	19.03888889	19.23111111	19.18111111	19.26111111	19.26333333	19.28	19.26222222	19.04222222	19.11777778	18.99333333	19.12	19.37555556	18.93888889	18.65222222	18.57111111	18.5	17.83	18.67222222	18.45111111	18.57222222
8/11/2019 12:02:16	-118.513988	42.54302993	1238.990645	-118.5139695	42.54301809	1233.872339	-118.5139731	42.54302137	1233.689516	8/11/2019 12:03:15	19.87555556	19.87777778	19.86444444	20.26111111	20.04222222	19.93666667	20.01888889	19.6	19.96777778	19.91333333	20.38	19.95555556	20.07333333	20.08444444	19.86333333	20.12111111	20.01888889	19.99666667	20.05111111	19.61333333	19.76222222	19.73888889	19.78666667	19.85222222	19.87333333	19.86444444	19.61666667	19.59888889	19.66	19.73222222	19.97888889	19.51444444	19.22666667	19.08888889	19.03222222	18.42888889	19.05444444	19.01777778	19.14333333
8/11/2019 12:02:17	-118.5139659	42.54302204	1238.911	-118.5139477	42.54301026	1233.8096	-118.513953	42.54301012	1233.584	8/11/2019 12:03:16	17.98888889	18.03666667	18.06666667	18.32444444	18.35444444	18.22333333	18.14333333	17.70666667	17.90111111	18.13333333	18.53666667	18.15888889	18.20888889	18.27333333	18.13777778	18.20444444	18.13777778	18.15	18.21	17.78111111	17.94	17.87333333	17.96333333	18.00555556	17.95333333	17.99555556	17.75222222	17.78777778	17.87	17.95222222	18.14555556	17.61	17.48444444	17.47111111	17.47222222	16.62666667	17.4	17.31888889	17.47777778
8/11/2019 12:02:18	-118.5139546	42.5430215	1238.936516	-118.5139365	42.54300995	1233.843903	-118.5139585	42.54301001	1233.467	8/11/2019 12:03:17	20.22666667	20.33111111	20.39777778	20.78333333	20.70666667	20.76777778	20.60333333	20.15555556	20.49333333	20.45111111	20.94555556	20.59444444	20.60555556	20.75444444	20.47444444	20.64777778	20.54444444	20.54555556	20.61444444	20.23555556	20.33888889	20.23777778	20.38666667	20.33555556	20.34888889	20.37777778	20.20777778	20.13888889	20.18	20.29222222	20.50666667	19.95555556	19.86222222	19.64888889	19.63222222	19.04222222	19.48222222	19.52666667	19.65111111
8/11/2019 12:02:19	-118.5139441	42.54303465	1238.903645	-118.5139269	42.54302206	1233.90519	-118.5139485	42.54301888	1233.309129	8/11/2019 12:03:18	19.119	18.956	18.855	19.339	19.146	19.011	19.069	18.615	19.046	19.017	19.444	19.029	19.126	19.195	19.064	19.188	19.012	18.962	19.084	18.741	18.86	18.841	18.806	18.84	18.877	18.86	18.69	18.655	18.64	18.964	19.103	18.484	18.309	18.388	18.387	17.568	18.351	18.16	18.319
8/11/2019 12:02:20	-118.5139315	42.54305471	1238.892419	-118.5139142	42.54304241	1233.922287	-118.5139265	42.54303856	1233.195742	8/11/2019 12:03:19	20.13666667	19.99222222	20.00222222	20.31888889	20.24222222	20.18888889	20.06777778	19.79111111	20.05666667	20.13444444	20.47222222	20.24333333	20.21222222	20.27555556	20.11222222	20.29777778	20.21666667	20.08	20.19222222	19.85888889	19.86666667	19.90777778	19.98777778	20.02444444	20	19.92444444	19.83222222	19.70555556	19.79333333	19.93333333	20.25666667	19.66	19.47555556	19.39555556	19.37555556	18.58333333	19.11666667	19.02777778	19.30222222
8/11/2019 12:02:21	-118.5139179	42.54307812	1238.894806	-118.5139006	42.54306552	1233.951461	-118.5139183	42.54307245	1233.300355	8/11/2019 12:03:20	20.75666667	20.70333333	20.80444444	21.05111111	20.96777778	20.89555556	20.83222222	20.55888889	20.80333333	20.91333333	21.31	20.99333333	20.96888889	21.02333333	20.86333333	21.02444444	20.91222222	20.87222222	20.97555556	20.66666667	20.68111111	20.57888889	20.78666667	20.76222222	20.69555556	20.67444444	20.49	20.41555556	20.46666667	20.63111111	20.82888889	20.37333333	20.27333333	20.05333333	20.22444444	19.31555556	19.95	19.83444444	19.98
8/11/2019 12:02:22	-118.5139027	42.5431037	1238.9	-118.5138856	42.54309079	1233.98198	-118.51391	42.54310506	1233.5408	8/11/2019 12:03:21	21.04888889	20.99333333	20.98555556	21.26333333	21.29888889	21.19555556	21.05	20.77111111	20.97222222	21.13888889	21.51666667	21.18111111	21.14666667	21.32222222	21.08777778	21.25777778	21.13888889	21.05222222	21.06333333	20.80444444	20.89888889	20.85222222	21.06777778	20.96444444	20.92444444	20.94555556	20.73888889	20.63222222	20.71	20.76888889	21.11444444	20.56333333	20.35	20.19888889	20.15666667	19.49333333	20.00444444	20.03222222	20.18666667
8/11/2019 12:02:23	-118.5138871	42.54313137	1238.846452	-118.5138706	42.54311719	1233.940274	-118.5138966	42.54312841	1233.608548	8/11/2019 12:03:22	18.86444444	19.13888889	18.97333333	19.31111111	19.26111111	19.2	19.16555556	18.76222222	19.07888889	19.13444444	19.53333333	19.17333333	19.18333333	19.27888889	19.10444444	19.22555556	19.09777778	19.18888889	19.24444444	18.85	19.00222222	18.81444444	19.01111111	18.98444444	19.01111111	18.98	18.81222222	18.73444444	18.67	18.80333333	19.18888889	18.58222222	18.43777778	18.30333333	18.29555556	17.60888889	18.31444444	18.12333333	18.38444444
8/11/2019 12:02:24	-118.5138736	42.54316012	1238.77771	-118.5138564	42.54314702	1233.864213	-118.5138831	42.54315496	1233.533742	8/11/2019 12:03:23	19.18777778	19.44333333	19.31	19.73888889	19.63555556	19.56888889	19.43777778	19.05555556	19.36666667	19.44777778	19.82666667	19.54888889	19.58222222	19.64444444	19.47555556	19.58555556	19.55	19.44555556	19.55444444	19.17333333	19.43222222	19.18222222	19.44	19.36222222	19.32666667	19.35111111	19.18333333	19.12777778	19.12	19.24555556	19.51777778	19.07777778	18.78555556	18.67444444	18.54444444	17.75	18.56333333	18.51555556	18.65444444
8/11/2019 12:02:25	-118.5138647	42.54318949	1238.742226	-118.5138474	42.54317632	1233.829539	-118.5138587	42.54316755	1233.394387	8/11/2019 12:03:24	20.51777778	20.83	20.72444444	21.10222222	21.15333333	21.03222222	20.83333333	20.59	20.79777778	20.89111111	21.36666667	20.94444444	21.03222222	21.2	20.81888889	21.01333333	21	20.99555556	20.99888889	20.60888889	20.74888889	20.61555556	20.77777778	20.71555556	20.78777778	20.71	20.54222222	20.50444444	20.5	20.66666667	20.86777778	20.36111111	20.14777778	20.15111111	19.87333333	19.11666667	19.8	19.83333333	20.02
8/11/2019 12:02:26	-118.5138594	42.54321858	1238.7384	-118.5138419	42.54320541	1233.84072	-118.5138468	42.5431927	1233.3246	8/11/2019 12:03:25	19.32555556	19.29888889	19.33444444	19.59888889	19.79333333	19.65777778	19.57777778	19.17	19.45444444	19.64888889	20.05555556	19.68333333	19.69	19.80666667	19.60333333	19.72555556	19.69666667	19.61555556	19.65666667	19.37111111	19.50222222	19.40666667	19.52333333	19.50111111	19.56555556	19.52555556	19.32	19.24222222	19.26	19.34333333	19.69222222	19.15666667	18.94888889	18.94888889	18.53444444	17.93666667	18.53222222	18.60777778	18.78222222
8/11/2019 12:02:27	-118.513858	42.5432465	1238.793677	-118.5138403	42.5432332	1233.874616	-118.5138418	42.54322059	1233.365226	8/11/2019 12:03:26	19.19444444	19.31555556	19.13555556	19.46111111	19.43	19.36	19.28777778	18.99555556	19.25111111	19.31666667	19.80777778	19.43555556	19.35222222	19.62888889	19.27	19.37444444	19.37444444	19.41	19.43333333	19.02555556	19.23333333	19.19444444	19.25222222	19.24555556	19.29444444	19.17222222	18.97	18.95222222	18.98666667	19.22333333	19.34777778	18.80444444	18.67555556	18.61111111	18.53666667	17.61	18.54777778	18.28	18.5
8/11/2019 12:02:28	-118.5138593	42.54327452	1238.813355	-118.5138416	42.54326125	1233.880626	-118.5138395	42.5432457	1233.344613	8/11/2019 12:03:27	19.495	19.62	19.666	20.078	19.913	19.847	19.815	19.398	19.695	19.844	20.125	19.861	19.822	19.993	19.726	19.926	19.79	19.737	19.85	19.552	19.612	19.518	19.652	19.633	19.644	19.568	19.406	19.408	19.354	19.518	19.831	19.259	19.128	18.968	18.858	17.995	18.771	18.77	18.947
8/11/2019 12:02:29	-118.5138639	42.54329942	1238.848581	-118.5138461	42.5432863	1233.906835	-118.5138405	42.54326886	1233.304	8/11/2019 12:03:28	19.93111111	20.09888889	19.95111111	20.17555556	20.26222222	20.01444444	20.01555556	19.60555556	19.93888889	20.03777778	20.43888889	20.07777778	20.08555556	20.16222222	20.02666667	20.13555556	20.08777778	19.97666667	20.05111111	19.66888889	19.90555556	19.75	19.94888889	19.96555556	19.93777778	19.90888889	19.71333333	19.65888889	19.67	19.81555556	20.03222222	19.48333333	19.44222222	19.38888889	18.99	18.12444444	18.95222222	19.19222222	19.01555556
8/11/2019 12:02:30	-118.5138727	42.54331704	1238.9626	-118.5138547	42.54330433	1233.91312	-118.5138454	42.54328582	1233.2532	8/11/2019 12:03:29	20.91111111	21.04888889	21.07222222	21.31111111	21.34222222	21.28888889	21.07777778	20.88333333	21.19333333	21.23888889	21.68111111	21.23888889	21.26666667	21.43777778	21.21444444	21.34666667	21.28888889	21.23555556	21.27777778	21.01333333	21.09333333	21.03444444	21.16888889	21.13333333	21.11444444	21.08222222	20.91111111	20.93888889	20.77333333	21.03	21.18111111	20.75666667	20.52666667	20.56333333	20.25888889	19.52777778	20.02	20.23666667	20.23333333
8/11/2019 12:02:31	-118.5138827	42.54333042	1238.998419	-118.5138644	42.54331776	1233.865781	-118.5138602	42.54330513	1233.20229	8/11/2019 12:03:30	21.01222222	21.10666667	21.07111111	21.43333333	21.40444444	21.25222222	21.36111111	20.75666667	21.17555556	21.27111111	21.67222222	21.31888889	21.33777778	21.48777778	21.21	21.43111111	21.21	21.21555556	21.27555556	20.95888889	21.11888889	20.96111111	21.15888889	21.07444444	21.20555556	21.09555556	20.94777778	20.95222222	20.78333333	21.11333333	21.22666667	20.70222222	20.50222222	20.44555556	20.01	19.47	20.09111111	20.25111111	20.28
8/11/2019 12:02:32	-118.5138945	42.54334134	1238.998871	-118.5138759	42.54332886	1233.791803	-118.5138724	42.54331829	1233.096839	8/11/2019 12:03:31	20.95444444	21.27111111	21.18777778	21.62111111	21.49222222	21.41222222	21.37222222	20.96111111	21.33555556	21.35111111	21.80444444	21.41111111	21.43888889	21.45222222	21.36666667	21.5	21.4	21.42444444	21.40888889	21.08111111	21.18777778	21.09888889	21.34666667	21.24888889	21.26777778	21.28777778	21.05	21.06555556	20.97	21.1	21.39333333	20.79	20.64333333	20.39444444	20.25	19.62555556	20.43666667	20.35555556	20.26666667
8/11/2019 12:02:33	-118.5139061	42.54335051	1238.994548	-118.5138877	42.54333812	1233.759758	-118.5138944	42.54333782	1233.142903	8/11/2019 12:03:32	21.13111111	21.47222222	21.22222222	21.58888889	21.57666667	21.54222222	21.34222222	21.11	21.34555556	21.54444444	21.84555556	21.45222222	21.48222222	21.63222222	21.46444444	21.55777778	21.49777778	21.38888889	21.50333333	21.23	21.23666667	21.09555556	21.30444444	21.26111111	21.28333333	21.32111111	21.1	21.09666667	21.09	21.13	21.46111111	20.93777778	20.63444444	20.77888889	20.84888889	20.00888889	20.48222222	20.55333333	20.64666667
8/11/2019 12:02:34	-118.5139175	42.54335827	1238.997258	-118.5138994	42.54334578	1233.766061	-118.5139132	42.54335462	1233.32971	8/11/2019 12:03:33	21.79111111	21.73666667	21.78555556	22.30666667	22.18555556	22.05666667	21.97222222	21.65	21.94888889	22.02444444	22.44111111	22.16444444	22.03555556	22.15	21.93777778	22.06666667	21.98555556	22.02111111	21.96555556	21.75777778	21.85444444	21.70777778	21.95555556	21.88333333	21.83888889	21.88111111	21.66222222	21.57	21.69	21.91888889	22.05111111	21.51888889	21.28333333	21.28666667	20.92666667	20.61666667	21.00777778	20.96666667	21.04333333
8/11/2019 12:02:35	-118.5139305	42.5433656	1239.0374	-118.5139126	42.54335279	1233.79974	-118.5139281	42.54336502	1233.5424	8/11/2019 12:03:34	23.06666667	23.24333333	23.21	23.48	23.33111111	23.34111111	23.28222222	22.88555556	23.18777778	23.36777778	23.68	23.36777778	23.29444444	23.48777778	23.20777778	23.32555556	23.29666667	23.25	23.25888889	22.98666667	23.11444444	22.88444444	23.08	23.09444444	23.08555556	23.06333333	22.85333333	22.78333333	22.78555556	22.97	23.23444444	22.66222222	22.49333333	22.24111111	22.29	21.46888889	22.01222222	22.20333333	22.29
8/11/2019 12:02:36	-118.5139453	42.54337409	1239.058935	-118.5139273	42.54336105	1233.810526	-118.5139597	42.54337578	1233.458581	8/11/2019 12:03:35	25.45111111	25.53777778	25.54666667	25.98111111	25.93222222	25.73111111	25.48111111	25.30333333	25.60222222	25.72222222	26.08444444	25.67	25.64888889	25.79888889	25.56333333	25.69555556	25.67888889	25.53444444	25.58888889	25.23111111	25.33777778	25.14111111	25.40555556	25.36111111	25.33666667	25.32444444	25.12666667	25.01	25.04	25.23	25.33555556	24.83111111	24.70777778	24.26444444	24.43333333	23.82111111	24.18333333	24.45222222	24.23777778
8/11/2019 12:02:37	-118.5139552	42.54338735	1239.145968	-118.5139371	42.54337425	1233.877923	-118.5139638	42.54338059	1233.223452	8/11/2019 12:03:36	22.139	22.149	21.978	22.546	22.408	22.266	22.25	21.976	22.245	22.333	22.615	22.349	22.304	22.455	22.239	22.45	22.291	22.252	22.34	22.015	22.151	21.95	22.153	21.961	22.122	22.122	21.927	21.963	21.893	21.933	22.222	21.65	21.386	21.442	21.088	20.552	21.068	21.119	21.283
8/11/2019 12:02:38	-118.5139524	42.5434121	1239.139226	-118.5139347	42.54339866	1233.924739	-118.5139267	42.54338774	1233.265323	8/11/2019 12:03:37	21.38	21.35888889	21.15333333	21.54444444	21.50666667	21.47222222	21.37444444	21.06888889	21.43333333	21.47777778	21.86	21.52666667	21.50555556	21.59111111	21.40777778	21.49555556	21.51777778	21.37888889	21.49777778	21.17888889	21.27333333	21.18666667	21.25777778	21.31	21.24222222	21.27666667	21.08333333	21.06	20.99	21.06222222	21.28333333	20.78333333	20.62555556	20.63222222	20.43777778	19.71666667	20.52888889	20.28333333	20.39333333
8/11/2019 12:02:39	-118.5139445	42.54343676	1239.1552	-118.5139265	42.5434239	1233.877797	-118.5139307	42.54342398	1233.3638	8/11/2019 12:03:38	20.91222222	21.09333333	20.93888889	21.40222222	21.32777778	21.22777778	21.01777778	20.76888889	21.04666667	21.11222222	21.50333333	21.16333333	21.22666667	21.32222222	21.09111111	21.20666667	21.17222222	21.10555556	21.12555556	20.76666667	20.92555556	20.79	21.04333333	20.91666667	20.95666667	20.96555556	20.75666667	20.67333333	20.7	20.80777778	21.09333333	20.54111111	20.34555556	20.26333333	19.89	19.68888889	19.99555556	20.10777778	20.28666667
8/11/2019 12:02:40	-118.5139363	42.54345802	1239.21371	-118.5139183	42.54344494	1233.836506	-118.5139215	42.54344528	1233.39	8/11/2019 12:03:39	21.21	21.11777778	21.31555556	21.52777778	21.57666667	21.51555556	21.41666667	21.04333333	21.26	21.39	21.74888889	21.47555556	21.48222222	21.55444444	21.32111111	21.45555556	21.38333333	21.29333333	21.46777778	21.06444444	21.16666667	21.04222222	21.20111111	21.15666667	21.22888889	21.20222222	21.02222222	20.95	20.94666667	21.07444444	21.28	20.80666667	20.64	20.52777778	20.19888889	19.98555556	20.31666667	20.34222222	20.48222222
8/11/2019 12:02:41	-118.5139279	42.54347594	1239.339774	-118.5139096	42.54346311	1233.876403	-118.5139103	42.54346127	1233.479613	8/11/2019 12:03:40	23.29555556	23.45111111	23.39	23.78444444	23.70888889	23.60222222	23.47	23.24444444	23.56222222	23.64	23.99888889	23.61222222	23.62777778	23.77555556	23.51666667	23.63666667	23.60888889	23.53666667	23.52777778	23.19	23.39333333	23.23333333	23.38	23.39555556	23.38777778	23.36444444	23.16	23.12	23.11444444	23.27444444	23.37444444	23.02111111	22.87666667	22.72	22.3	21.52444444	22.36222222	22.33888889	22.39666667
8/11/2019 12:02:42	-118.5139183	42.54349224	1239.411419	-118.5138996	42.54347952	1233.83511	-118.5138936	42.54347558	1233.601774	8/11/2019 12:03:41	22.68444444	22.83888889	22.79888889	23.06888889	22.97222222	22.82222222	22.78111111	22.51444444	22.73555556	22.76666667	23.26444444	22.97111111	22.78888889	23.02	22.78666667	22.99555556	22.91888889	22.78888889	22.81888889	22.47	22.69888889	22.47111111	22.64111111	22.63111111	22.72888889	22.62111111	22.36222222	22.28111111	22.37	22.43555556	22.70333333	22.19111111	22.06777778	22.07666667	21.68222222	21.03222222	21.63	21.52888889	21.81444444
8/11/2019 12:02:43	-118.513907	42.54350787	1239.463355	-118.5138881	42.54349536	1233.792674	-118.5138851	42.54348939	1233.599387	8/11/2019 12:03:42	22.17222222	22.07666667	22.11111111	22.39222222	22.50777778	22.31666667	22.37	21.91	22.13	22.28222222	22.65777778	22.40444444	22.33333333	22.54333333	22.31444444	22.46444444	22.31444444	22.27555556	22.35777778	22.00333333	22.08666667	22.02777778	22.18888889	22.13	22.13333333	22.15222222	21.90777778	21.79333333	21.82	22.01222222	22.17	21.71	21.55333333	21.41	21.26222222	20.20777778	21.19444444	21.03	21.32444444
8/11/2019 12:02:44	-118.5138966	42.54352133	1239.5435	-118.5138778	42.54350883	1233.815	-118.5139021	42.54351212	1233.38575	8/11/2019 12:03:43	19.56333333	19.7	19.55	19.93	20.00111111	19.80111111	19.74888889	19.40666667	19.84444444	19.76777778	20.26888889	19.85333333	19.91444444	19.99888889	19.69	19.96333333	19.81555556	19.83777778	19.80777778	19.38555556	19.63111111	19.55111111	19.62777778	19.60666667	19.63666667	19.70111111	19.38333333	19.40666667	19.42	19.47555556	19.74555556	19.24555556	19.02111111	18.83444444	18.66444444	18.07666667	18.73555556	18.71333333	18.86666667
8/11/2019 12:02:45	-118.5138857	42.54353606	1239.712541	-118.5138669	42.54352358	1233.955124	-118.5138982	42.54353038	1233.220622	8/11/2019 12:03:44	19.12666667	19.09555556	19.27444444	19.58888889	19.41222222	19.27888889	19.30444444	18.79888889	19.27111111	19.24888889	19.68111111	19.31111111	19.40555556	19.42111111	19.25777778	19.38111111	19.30666667	19.18333333	19.20777778	18.94111111	19.07666667	18.99444444	19.09666667	19.04777778	19.03555556	19.16444444	18.89555556	18.84555556	18.78	19.09222222	19.24111111	18.80333333	18.57777778	18.66	18.58666667	17.62444444	18.33777778	18.17555556	18.22555556
8/11/2019 12:02:46	-118.5138749	42.54355262	1239.820516	-118.5138561	42.54354013	1234.037948	-118.5138807	42.54354702	1233.148516	8/11/2019 12:03:45	20.241	20.386	20.313	20.605	20.757	20.517	20.477	20.027	20.428	20.508	20.94	20.632	20.536	20.607	20.418	20.573	20.539	20.412	20.471	20.194	20.317	20.227	20.309	20.315	20.172	20.335	20.029	20.029	20.008	20.132	20.345	19.928	19.622	19.533	19.335	18.711	19.431	19.176	19.62
8/11/2019 12:02:47	-118.5138643	42.54356755	1239.810677	-118.5138453	42.54355488	1234.002816	-118.5138641	42.54356145	1233.115871	8/11/2019 12:03:46	17.58	17.72888889	17.58444444	17.98444444	17.91333333	17.87333333	17.79777778	17.47222222	17.69555556	17.75	18.15666667	17.83111111	17.81888889	17.95	17.75111111	17.88444444	17.76555556	17.71888889	17.79	17.45111111	17.57666667	17.41777778	17.58444444	17.56444444	17.61888889	17.50111111	17.35111111	17.27777778	17.32666667	17.36666667	17.66	17.27888889	16.94666667	16.98	16.82	16.16	16.99333333	16.66888889	16.91
8/11/2019 12:02:48	-118.5138541	42.54358192	1239.8528	-118.513835	42.54356932	1234.02914	-118.5138523	42.5435717	1233.1742	8/11/2019 12:03:47	16.99222222	16.99666667	16.96444444	17.36666667	17.12444444	17.06444444	17.08666667	16.76888889	16.95111111	17.07555556	17.47666667	17.02222222	17.13888889	17.25222222	16.98111111	17.23	16.93666667	16.88	17.01222222	16.70333333	16.74555556	16.67888889	16.85	16.77222222	16.83555556	16.85333333	16.65	16.46444444	16.55	16.60444444	16.96888889	16.36222222	16.05777778	16.05111111	16.52888889	15.27333333	16.25111111	15.99111111	16.09555556
8/11/2019 12:02:49	-118.5138451	42.54359613	1239.884839	-118.5138258	42.54358352	1234.038381	-118.5138505	42.54357634	1233.37	8/11/2019 12:03:48	16.96555556	16.92888889	17.00555556	17.18888889	17.18444444	17.08111111	16.91111111	16.73	16.95666667	16.97888889	17.26444444	17.04666667	16.96111111	17.11666667	16.91555556	17.00666667	16.95666667	16.98666667	16.98555556	16.68222222	16.67888889	16.66888889	16.74444444	16.75	16.70777778	16.74666667	16.57888889	16.48111111	16.54333333	16.58444444	16.86555556	16.36333333	16.15333333	16.05111111	15.95222222	15.29777778	15.85444444	16.12555556	16.15777778
8/11/2019 12:02:50	-118.5138373	42.54360956	1239.863968	-118.5138177	42.54359678	1233.998019	-118.5138453	42.54358578	1233.524935	8/11/2019 12:03:49	16.76	16.78333333	16.92222222	17.14444444	17.10333333	17.03888889	16.96444444	16.57222222	16.9	17.00777778	17.35888889	17.06333333	16.93	17.12111111	16.90555556	17.01666667	16.92777778	16.85555556	16.90333333	16.48444444	16.64	16.60111111	16.79555556	16.72777778	16.70111111	16.76444444	16.56666667	16.39888889	16.65	16.53555556	16.89	16.28111111	16.21888889	16.17666667	15.87888889	15.56222222	16.08	15.86777778	16.05666667
8/11/2019 12:02:51	-118.51383	42.54362258	1239.808645	-118.5138102	42.54360986	1233.921858	-118.5138361	42.54359992	1233.606548	8/11/2019 12:03:50	16.82222222	16.81555556	16.69444444	17.09888889	17.00555556	16.93888889	16.84888889	16.47888889	16.85	16.82111111	17.13333333	16.86111111	16.82222222	17.02444444	16.72444444	16.83777778	16.82333333	16.76666667	16.79888889	16.34222222	16.58	16.47222222	16.64555556	16.63111111	16.61222222	16.68	16.42777778	16.31888889	16.40333333	16.50444444	16.82888889	16.18666667	16.01444444	15.79888889	16.22	15.2	16.15	15.87888889	16.15111111
8/11/2019 12:02:52	-118.5138233	42.54363374	1239.756567	-118.5138031	42.54362149	1233.873697	-118.5138276	42.54361391	1233.677367	8/11/2019 12:03:51	17.49555556	17.49444444	17.42111111	17.73333333	17.68	17.51111111	17.56666667	17.20888889	17.34555556	17.42666667	17.91111111	17.51888889	17.59888889	17.60666667	17.42666667	17.59888889	17.53444444	17.40333333	17.45555556	17.18222222	17.27111111	17.11111111	17.33555556	17.34111111	17.24222222	17.27666667	17.04777778	17.05222222	16.98	17.21	17.37222222	16.89	16.69888889	16.68666667	16.59	15.92222222	16.66555556	16.51555556	16.78666667
8/11/2019 12:02:53	-118.5138192	42.54364024	1239.702194	-118.5137988	42.54362797	1233.822926	-118.51382	42.54362316	1233.839387	8/11/2019 12:03:52	16.58555556	16.91	16.73222222	16.93888889	16.90666667	16.87222222	16.80444444	16.38	16.69111111	16.77111111	17.15777778	16.79666667	16.86	16.93	16.74222222	16.85222222	16.76333333	16.68888889	16.81444444	16.39666667	16.57333333	16.40666667	16.54	16.56444444	16.48777778	16.55444444	16.37555556	16.27666667	16.28333333	16.47222222	16.71888889	16.18777778	15.94666667	15.92444444	15.91222222	15.23111111	15.95555556	15.76333333	15.85444444
8/11/2019 12:02:54	-118.513823	42.54364254	1239.65729	-118.5138022	42.54363063	1233.772584	-118.5138191	42.54362755	1234.030323	8/11/2019 12:03:53	17.19	17.277	17.385	17.76	17.607	17.466	17.32	17.002	17.32	17.438	17.793	17.342	17.42	17.515	17.358	17.53	17.421	17.363	17.358	17.066	17.113	17.114	17.147	17.185	17.213	17.239	16.941	16.996	16.891	17.044	17.366	16.886	16.464	16.58	16.498	15.693	16.57	16.325	16.344
8/11/2019 12:02:55	-118.5138387	42.54364825	1239.673903	-118.5138176	42.54363662	1233.757268	-118.5138329	42.54363298	1234.225645	8/11/2019 12:03:54	17.38444444	17.42666667	17.40555556	17.7	17.66111111	17.55555556	17.31555556	17.03555556	17.35777778	17.39111111	17.78666667	17.34888889	17.39	17.52555556	17.26666667	17.38888889	17.39	17.26	17.30333333	16.93	17.06555556	16.94111111	17.08333333	17.06777778	17.15	17.17111111	16.91555556	16.87666667	16.79333333	16.97555556	17.08888889	16.62	16.52111111	16.54555556	16.48555556	16.07	16.49555556	16.30111111	16.46666667
8/11/2019 12:02:56	-118.5138668	42.54365637	1239.804774	-118.5138453	42.54364498	1233.8517	-118.5138585	42.54364118	1234.497129	8/11/2019 12:03:55	16.18555556	16.16	16.18222222	16.38888889	16.46666667	16.25888889	16.16666667	15.76	16.15777778	16.19222222	16.56222222	16.17111111	16.13888889	16.36222222	16.08222222	16.22333333	16.21444444	16.06555556	16.09	15.69555556	15.91666667	15.83888889	15.94555556	15.94666667	15.95555556	15.90555556	15.77222222	15.71444444	15.77	15.82888889	16.03444444	15.55777778	15.28	15.51888889	15.5	14.80777778	15.52	15.23444444	15.44
8/11/2019 12:02:57	-118.5139029	42.54366532	1239.949	-118.5138808	42.54365417	1233.95968	-118.5138952	42.54365078	1234.8472	8/11/2019 12:03:56	17.18444444	17.08777778	17.04111111	17.43	17.42111111	17.29	17.32555556	16.81444444	17.18444444	17.20888889	17.60222222	17.19555556	17.23222222	17.33555556	17.06555556	17.20555556	17.07444444	17.09222222	17.16444444	16.78888889	16.87777778	16.75444444	16.87555556	16.86666667	16.83	16.91777778	16.86777778	16.72111111	16.60666667	16.81777778	17.08666667	16.45333333	16.30222222	16.28777778	16.37666667	15.36222222	16.19666667	16.11444444	16.21111111
8/11/2019 12:02:58	-118.5139271	42.5436698	1240.046774	-118.5139047	42.54365886	1234.008403	-118.5139228	42.54365653	1235.183226	8/11/2019 12:03:57	16.82777778	16.93444444	16.98	17.26888889	17.32777778	17.12777778	17.15777778	16.74222222	17.10555556	17.11444444	17.54111111	17.12555556	17.10444444	17.27777778	16.98555556	17.10444444	17.11333333	17.06666667	17.01444444	16.66777778	16.89222222	16.81888889	16.88	16.86111111	16.90777778	16.88777778	16.67666667	16.71	16.54	16.70888889	16.96888889	16.48222222	16.19888889	16.26	16.16	15.38111111	16.26	15.95555556	16.18333333
8/11/2019 12:02:59	-118.5139362	42.54366547	1239.928065	-118.5139137	42.5436547	1233.862268	-118.5139315	42.54365271	1235.296677	8/11/2019 12:03:58	17.36666667	17.42666667	17.23666667	17.59777778	17.66555556	17.54	17.47777778	16.99444444	17.33666667	17.41555556	17.83777778	17.41555556	17.35888889	17.50777778	17.22888889	17.41444444	17.4	17.34	17.31888889	17.05444444	17.19222222	17.08666667	17.20444444	17.12222222	17.15888889	17.17111111	17.01444444	16.94222222	17.01666667	17.12222222	17.25777778	16.82333333	16.71888889	16.50444444	16.53777778	15.60222222	16.43777778	16.47222222	16.59555556
8/11/2019 12:03:00	-118.5139457	42.54365515	1239.899323	-118.513923	42.54364458	1233.811061	-118.5139389	42.54364251	1235.408355	8/11/2019 12:03:59	16.51111111	16.54333333	16.63111111	16.85777778	16.91333333	16.74333333	16.59111111	16.28222222	16.62	16.62888889	17.10444444	16.68111111	16.62888889	16.70222222	16.56222222	16.63777778	16.57111111	16.50888889	16.59222222	16.23555556	16.32888889	16.24666667	16.40444444	16.35444444	16.40666667	16.30111111	16.12333333	16.12555556	16.18	16.22666667	16.53	16.01111111	15.72888889	15.73	16.03888889	15.09222222	15.80777778	15.57222222	15.74666667
8/11/2019 12:03:01	-118.5139546	42.54364136	1239.923	-118.5139318	42.54363123	1233.799635	-118.5139497	42.54362812	1235.527613	8/11/2019 12:04:00	17.005	17.095	17.136	17.47	17.255	17.257	17.137	16.687	17.043	17.099	17.48	17.127	17.063	17.266	17.035	17.193	17.015	16.972	17.026	16.673	16.833	16.71	16.817	16.804	16.778	16.795	16.659	16.637	16.534	16.725	16.991	16.417	16.267	16.165	16.041	15.486	16.312	15.953	16.168
8/11/2019 12:03:02	-118.513963	42.5436279	1240.0162	-118.5139402	42.54361791	1233.884153	-118.5139696	42.54361457	1235.5453	8/11/2019 12:04:01	17.56	17.63888889	17.64222222	17.96222222	17.78777778	17.72	17.68222222	17.31555556	17.55222222	17.59555556	18.05888889	17.64888889	17.67555556	17.82777778	17.59111111	17.76888889	17.79	17.63888889	17.65777778	17.29111111	17.43888889	17.28888889	17.44333333	17.37777778	17.43	17.46777778	17.29	17.12666667	17.17333333	17.32777778	17.60777778	17.07111111	16.85444444	16.84222222	16.87333333	16.03555556	16.69555556	16.60555556	16.82222222
8/11/2019 12:03:03	-118.513972	42.54361491	1240.153516	-118.5139483	42.54360578	1233.966506	-118.5139759	42.54360171	1235.643452	8/11/2019 12:04:02	19.61222222	19.65	19.53666667	20.13666667	19.93	19.95555556	19.83222222	19.44555556	19.73666667	19.76555556	20.19333333	19.8	19.79111111	19.97555556	19.70222222	19.85666667	19.90111111	19.77888889	19.83222222	19.47111111	19.55	19.50888889	19.73111111	19.65777778	19.60777778	19.58	19.43777778	19.37333333	19.32	19.53	19.77666667	19.21777778	18.92888889	18.90555556	18.74222222	18.01777778	18.63222222	19.00555556	18.87555556
8/11/2019 12:03:04	-118.5139812	42.5436015	1240.197032	-118.5139573	42.54359251	1233.921106	-118.5139825	42.54358701	1235.609935	8/11/2019 12:04:03	23.10777778	22.97222222	23.11666667	23.24111111	23.37777778	23.32	23.21777778	22.84666667	23.20555556	23.26333333	23.67111111	23.32	23.26	23.36444444	23.13777778	23.30777778	23.21888889	23.21555556	23.22	22.87222222	22.99666667	22.82	22.99	22.90111111	22.98222222	22.84555556	22.79222222	22.63777778	22.60333333	22.85444444	23.03777778	22.52666667	22.18444444	22.14444444	21.99777778	21.33777778	22.05666667	21.83	22.03555556
8/11/2019 12:03:05	-118.51399	42.54358828	1240.186742	-118.5139655	42.54357967	1233.855639	-118.5139878	42.54357446	1235.556419	8/11/2019 12:04:04	25.89777778	25.87888889	25.82777778	26.15666667	26.16333333	26.03555556	26.05222222	25.55888889	25.97111111	26.01777778	26.41555556	26.10444444	25.98111111	26.20111111	25.92444444	25.99333333	25.88888889	25.93555556	25.96	25.60333333	25.72333333	25.51888889	25.75333333	25.68111111	25.63	25.63444444	25.37	25.33666667	25.35777778	25.48777778	25.55555556	25.01111111	24.89111111	24.70666667	24.61222222	23.78888889	24.35222222	24.48333333	24.67777778
8/11/2019 12:03:06	-118.5140001	42.54357468	1240.140194	-118.5139758	42.54356544	1233.793361	-118.5139934	42.54356067	1235.605355	8/11/2019 12:04:05	27.56555556	27.67333333	27.65	27.80555556	27.89777778	27.82777778	27.58888889	27.29444444	27.56111111	27.69222222	28.02555556	27.74111111	27.69666667	27.77888889	27.61444444	27.66777778	27.57666667	27.63555556	27.61555556	27.30333333	27.21222222	27.23333333	27.32	27.19888889	27.27111111	27.2	27.02222222	26.81	26.83333333	27.12111111	27.15666667	26.70111111	26.51333333	26.42222222	25.90777778	25.25444444	25.99777778	26.05111111	26.11555556
8/11/2019 12:03:07	-118.5140096	42.54355964	1240.0516	-118.5139857	42.54355019	1233.751863	-118.5140002	42.543545	1235.6396	8/11/2019 12:04:06	23.93333333	24.02444444	24.11777778	24.23666667	24.32777778	24.16333333	24.09555556	23.76444444	23.95	24.09222222	24.6	24.09666667	24.10555556	24.20555556	23.93111111	24.07111111	24.04111111	23.98222222	24.09333333	23.72333333	23.89	23.68666667	23.87	23.8	23.83333333	23.86666667	23.71333333	23.62444444	23.51	23.70222222	24.01333333	23.36444444	23.21555556	23.08444444	22.65222222	22.46	23.05666667	22.86888889	22.93222222
8/11/2019 12:03:08	-118.5140206	42.54354159	1240.069226	-118.5139966	42.54353253	1233.771503	-118.5140079	42.54352629	1235.725065	8/11/2019 12:04:07	22.49111111	22.49333333	22.54777778	22.95333333	22.84333333	22.81888889	22.68111111	22.41333333	22.64111111	22.64444444	23.13	22.71666667	22.66444444	22.75555556	22.56111111	22.71888889	22.65888889	22.58777778	22.53777778	22.24222222	22.38	22.24444444	22.41555556	22.33666667	22.34777778	22.33111111	22.08222222	22.05222222	22.1	22.12222222	22.35111111	21.89444444	21.71444444	21.71777778	21.44222222	20.94444444	21.40222222	21.45777778	21.62
8/11/2019 12:03:09	-118.5140321	42.54352297	1240.124484	-118.5140083	42.54351399	1233.813335	-118.5140187	42.54350791	1235.845226	8/11/2019 12:04:08	28.14666667	28.38444444	28.38111111	28.55	28.49	28.50444444	28.42222222	28.06666667	28.36222222	28.43666667	28.82	28.49444444	28.46111111	28.56222222	28.28888889	28.38111111	28.37777778	28.30888889	28.33444444	28.04111111	27.93111111	27.90333333	27.95	27.86555556	27.90888889	27.85777778	27.64444444	27.50666667	27.56	27.67222222	27.76	27.27777778	27.17888889	27.12	26.75777778	26.02333333	26.69222222	26.75222222	26.80333333
8/11/2019 12:03:10	-118.514043	42.54350614	1240.186806	-118.5140189	42.54349739	1233.8698	-118.5140308	42.54349228	1235.994258	8/11/2019 12:04:09	24.174	24.419	24.261	24.61	24.534	24.486	24.443	23.968	24.336	24.387	24.734	24.396	24.42	24.505	24.213	24.43	24.373	24.242	24.377	24.015	24.054	23.953	24.105	24.087	24.156	24.049	23.929	23.909	23.783	23.992	24.255	23.68	23.604	23.584	23.019	22.515	23.384	23.195	23.427
8/11/2019 12:03:11	-118.5140524	42.5434905	1240.3116	-118.5140283	42.5434818	1233.976497	-118.5140407	42.5434773	1236.2077	8/11/2019 12:04:10	23.11888889	23.23	23.25555556	23.4	23.50555556	23.52555556	23.30222222	23.02333333	23.31888889	23.30333333	23.80222222	23.45666667	23.32444444	23.47	23.21333333	23.34111111	23.27333333	23.17111111	23.21666667	22.83888889	23.05	22.85555556	23.01888889	23.00777778	22.94333333	22.97	22.74333333	22.71111111	22.62333333	22.73333333	23.11111111	22.60555556	22.21777778	22.29111111	22.20666667	21.38777778	22.02666667	22.03	22.14888889
8/11/2019 12:03:12	-118.5140623	42.54347615	1240.423625	-118.5140381	42.5434675	1234.042569	-118.5140499	42.54346304	1236.398375	8/11/2019 12:04:11	20.65	20.82888889	20.65333333	20.84777778	21.00111111	21.04444444	20.87111111	20.54111111	20.72888889	20.75666667	21.18	20.83555556	20.78888889	20.87666667	20.61777778	20.79888889	20.70111111	20.58333333	20.68111111	20.33333333	20.48666667	20.37555556	20.47111111	20.41222222	20.46222222	20.48888889	20.28888889	20.30222222	20.28	20.21555556	20.51222222	20.12888889	19.95555556	19.63888889	19.84666667	19.07555556	19.69888889	19.68888889	19.8
8/11/2019 12:03:13	-118.5140684	42.54346814	1240.373967	-118.5140445	42.54345954	1234.032717	-118.5140529	42.54345371	1236.4998	8/11/2019 12:04:12	20.25555556	20.44555556	20.52555556	20.92111111	20.95	20.90666667	20.70333333	20.36	20.74111111	20.80111111	21.20333333	20.82111111	20.76777778	20.80333333	20.60777778	20.76222222	20.60666667	20.64666667	20.62222222	20.31222222	20.34333333	20.28	20.38777778	20.38444444	20.38111111	20.38111111	20.16888889	20.11333333	20.00333333	20.32555556	20.57666667	19.83777778	19.66666667	19.74666667	19.75444444	19.01	19.65333333	19.39666667	19.73333333
8/11/2019 12:03:14	-118.5140691	42.54346724	1240.211129	-118.5140454	42.54345844	1233.929545	-118.514051	42.5434524	1236.576806	8/11/2019 12:04:13	20.81222222	21.05555556	20.87333333	21.43888889	21.42	21.30444444	21.18111111	20.75222222	21.15555556	21.2	21.59444444	21.19666667	21.17222222	21.28444444	21.11333333	21.23222222	21.14888889	20.99222222	21.03555556	20.84555556	20.83444444	20.75888889	20.84	20.82	20.74333333	20.86777778	20.72666667	20.58222222	20.59666667	20.63555556	20.88	20.40111111	20.22777778	20.23555556	20.01111111	19.39555556	20.13666667	19.94444444	20.04666667
8/11/2019 12:03:15	-118.5140689	42.54346788	1240.184065	-118.5140454	42.54345878	1233.930532	-118.5140508	42.5434527	1236.647387	8/11/2019 12:04:14	22.54	22.69555556	22.61	22.90444444	22.99888889	22.92444444	22.77222222	22.39444444	22.73222222	22.83666667	23.21111111	22.80444444	22.88444444	22.94333333	22.66666667	22.82444444	22.71555556	22.68777778	22.73888889	22.35333333	22.4	22.33555556	22.44333333	22.48222222	22.49666667	22.44888889	22.15555556	22.08555556	22.09	22.30666667	22.49444444	21.98111111	21.83444444	21.68333333	21.33	21.04333333	21.69222222	21.45555556	21.48111111
8/11/2019 12:03:16	-118.5140697	42.54346812	1240.1874	-118.5140463	42.54345884	1233.9835	-118.5140514	42.54345316	1236.6942	8/11/2019 12:04:15	23.33333333	23.66666667	23.40222222	23.73111111	23.78555556	23.66111111	23.50777778	23.30222222	23.53555556	23.69111111	24.03666667	23.65	23.60777778	23.8	23.36444444	23.65222222	23.57444444	23.41555556	23.52666667	23.08555556	23.22444444	23.14333333	23.18777778	23.22777778	23.24222222	23.25888889	23.05777778	22.90111111	22.94222222	23.08444444	23.29666667	22.85666667	22.58555556	22.61333333	22.44555556	21.81222222	22.43111111	22.35666667	22.45666667
8/11/2019 12:03:17	-118.5140699	42.54346834	1240.135226	-118.5140464	42.543459	1233.943739	-118.5140522	42.54345358	1236.726387	8/11/2019 12:04:16	24.03888889	23.97444444	24.04222222	24.39777778	24.38333333	24.20333333	24.15666667	23.80333333	24.11222222	24.25222222	24.62	24.21222222	24.09111111	24.31111111	24.06333333	24.23888889	24.15111111	24.07	24.15111111	23.76333333	23.87666667	23.66333333	23.85	23.86111111	23.85111111	23.78444444	23.63666667	23.47444444	23.56333333	23.7	23.84333333	23.36666667	23.18888889	22.89333333	23.23444444	22.20555556	22.90777778	22.74888889	23.05111111
8/11/2019 12:03:18	-118.5140691	42.54346856	1240.095839	-118.5140454	42.54345902	1233.924074	-118.5140529	42.54345382	1236.721484	8/11/2019 12:04:17	25.16111111	25.22111111	25.41888889	25.76555556	25.62777778	25.59333333	25.57222222	25.15333333	25.37222222	25.53888889	25.88333333	25.55888889	25.49777778	25.61888889	25.36	25.53222222	25.47666667	25.33111111	25.36666667	25.09666667	25.15222222	25.01666667	25.17666667	25.06	25.07777778	25.01888889	24.88444444	24.8	24.74333333	24.95222222	25.13666667	24.68222222	24.46555556	24.53777778	24.36444444	23.68888889	24.03444444	24.21333333	24.4
8/11/2019 12:03:19	-118.5140586	42.54346501	1239.964903	-118.5140348	42.54345532	1233.846639	-118.5140465	42.54345231	1236.667935	8/11/2019 12:04:18	24.417	24.26	24.415	24.619	24.618	24.679	24.461	24.108	24.363	24.443	24.793	24.446	24.506	24.534	24.23	24.484	24.353	24.279	24.367	23.984	24.033	23.901	24.114	24.027	23.997	24.051	23.837	23.774	23.776	23.989	23.986	23.758	23.587	23.526	23.242	22.604	23.124	23.089	23.331
8/11/2019 12:03:20	-118.5140365	42.54345708	1239.4792	-118.5140124	42.54344712	1233.43772	-118.5140261	42.54344496	1236.2614	8/11/2019 12:04:19	20.85555556	21.03666667	20.90888889	21.25222222	21.15888889	21.07888889	21.08888889	20.7	20.96666667	20.98666667	21.50777778	21.05111111	21.04	21.14222222	20.90777778	21.14888889	20.94666667	20.88333333	21.06	20.60111111	20.75888889	20.64666667	20.82444444	20.83555556	20.76555556	20.74111111	20.59777778	20.53888889	20.42333333	20.64444444	20.90666667	20.41888889	20.36444444	20.25444444	19.89777778	19.24666667	20.09888889	19.89222222	20.26222222
8/11/2019 12:03:21	-118.5140103	42.54344814	1238.977387	-118.5139861	42.5434381	1232.994655	-118.5139998	42.54343594	1235.783097	8/11/2019 12:04:20	22.35888889	22.44333333	22.33777778	22.76111111	22.84333333	22.59	22.49888889	22.19666667	22.51333333	22.50888889	22.85666667	22.52666667	22.55444444	22.70555556	22.36666667	22.63222222	22.51555556	22.5	22.50222222	22.10666667	22.27777778	22.02888889	22.22555556	22.24	22.27	22.23222222	22.06222222	21.90666667	21.98555556	22.07444444	22.33	21.80222222	21.76444444	21.36666667	21.26222222	20.76333333	20.98333333	21.49333333	21.35444444
8/11/2019 12:03:22	-118.513984	42.5434402	1238.474774	-118.5139598	42.54343006	1232.5462	-118.5139732	42.54342763	1235.295903	8/11/2019 12:04:21	20.98	21.25777778	21.16444444	21.61	21.52444444	21.53666667	21.36777778	20.98555556	21.42444444	21.36333333	21.78666667	21.50222222	21.41222222	21.61444444	21.37	21.46555556	21.33555556	21.28555556	21.40333333	21.10888889	21.15222222	21.07333333	21.22777778	21.16666667	21.26	21.18333333	21.01111111	20.95888889	20.92	21.10444444	21.31444444	20.82	20.57777778	20.68333333	20.38777778	19.77333333	20.16888889	20.40555556	20.52111111
8/11/2019 12:03:23	-118.5139597	42.54343444	1237.968258	-118.5139353	42.54342422	1232.075523	-118.5139483	42.54342172	1234.812806	8/11/2019 12:04:22	20.86666667	21.20666667	21.22111111	21.31222222	21.43666667	21.39555556	21.14333333	20.82333333	21.15888889	21.19666667	21.71	21.29555556	21.29555556	21.37222222	21.20666667	21.26222222	21.26222222	21.19888889	21.26777778	20.91222222	21.01444444	20.87777778	21.05222222	20.94	20.99111111	21.02666667	20.83555556	20.75222222	20.77	20.98	21.16777778	20.55222222	20.42333333	20.38888889	20.42222222	19.49333333	20.28666667	20.32444444	20.4
8/11/2019 12:03:24	-118.5139405	42.54343002	1237.308516	-118.5139158	42.54341971	1231.445294	-118.5139284	42.54341699	1234.172032	8/11/2019 12:04:23	21.42333333	21.63555556	21.51333333	21.83777778	21.89444444	21.90333333	21.75	21.36111111	21.76222222	21.78444444	22.22777778	21.78666667	21.80888889	21.81666667	21.72666667	21.85555556	21.74333333	21.75444444	21.74777778	21.49	21.49444444	21.43888889	21.51111111	21.42333333	21.56888889	21.49111111	21.36222222	21.24444444	21.32	21.41111111	21.58888889	21.08	21.03111111	20.86444444	20.44666667	20.01	20.73444444	20.65777778	20.75333333
8/11/2019 12:03:25	-118.5139257	42.54342682	1236.545839	-118.5139008	42.54341648	1230.692861	-118.5139132	42.54341364	1233.414677	8/11/2019 12:04:24	21.28555556	21.02444444	21.15777778	21.43444444	21.45	21.32444444	21.22777778	20.99444444	21.08666667	21.34222222	21.72888889	21.34888889	21.18333333	21.50888889	21.25444444	21.40777778	21.25666667	21.16444444	21.28888889	20.88555556	21.07	20.98777778	21.11333333	21.07	20.96888889	21.08444444	20.91333333	20.74222222	20.84333333	21.00777778	21.25	20.74888889	20.50444444	20.57666667	20.32	19.59222222	20.52333333	20.12	20.38666667
8/11/2019 12:03:26	-118.5139135	42.54342392	1235.7634	-118.5138886	42.54341368	1229.934127	-118.5139016	42.5434108	1232.6039	8/11/2019 12:04:25	21.01888889	21.07	20.90888889	21.25777778	21.39	21.36777778	21.15333333	20.79888889	21.16777778	21.24444444	21.65111111	21.17777778	21.26555556	21.34444444	21.13888889	21.29	21.14777778	21.10444444	21.16888889	20.81666667	20.96888889	20.82555556	20.96	21.01888889	21.05111111	20.98333333	20.84222222	20.70222222	20.70666667	20.87111111	21.21333333	20.63	20.44222222	20.24888889	20.15666667	19.24	20.03666667	20.03222222	20.24
8/11/2019 12:03:27	-118.5139011	42.54342116	1234.987387	-118.5138759	42.54341086	1229.164542	-118.5138897	42.54340804	1231.782	8/11/2019 12:04:26	21.39777778	21.54	21.36777778	21.67777778	21.75	21.54	21.55444444	21.13222222	21.47222222	21.56	21.97666667	21.53888889	21.51444444	21.74777778	21.47666667	21.60444444	21.56666667	21.40777778	21.52222222	21.07888889	21.21666667	21.18	21.30777778	21.29	21.31555556	21.33444444	21.09222222	20.97444444	20.98333333	21.18444444	21.39777778	21.02444444	20.68444444	20.71777778	20.36111111	19.71555556	20.47666667	20.35333333	20.56222222
8/11/2019 12:03:28	-118.5138785	42.54341485	1234.281032	-118.5138531	42.54340447	1228.467794	-118.5138677	42.54340205	1231.028613	8/11/2019 12:04:27	19.051	19.195	19.152	19.559	19.561	19.305	19.309	18.934	19.254	19.319	19.73	19.324	19.233	19.465	19.242	19.379	19.296	19.257	19.411	18.995	19.092	18.998	19.187	19.094	19.134	19.058	18.924	18.918	18.742	18.986	19.288	18.741	18.479	18.437	18.519	17.714	18.28	18.434	18.451
8/11/2019 12:03:29	-118.5138392	42.54340218	1233.554065	-118.5138144	42.54339203	1227.768026	-118.5138288	42.54338948	1230.290129	8/11/2019 12:04:28	18.90666667	18.93	18.97333333	19.36111111	19.18555556	19.13	18.97333333	18.67888889	19.03	19.02	19.51	19.09111111	19.09888889	19.15666667	19.06444444	19.27444444	19.14888889	19.05222222	19.12555556	18.76	18.86444444	18.78333333	18.91555556	18.85333333	18.88888889	18.95555556	18.73777778	18.68111111	18.64666667	18.80111111	19.04	18.59666667	18.21666667	18.31	18.26	17.64888889	18.12666667	17.96777778	18.26666667
8/11/2019 12:03:30	-118.5137932	42.5433886	1232.8374	-118.5137678	42.54337825	1227.05128	-118.5137812	42.54337558	1229.551	8/11/2019 12:04:29	18.61333333	18.55222222	18.52555556	18.96444444	18.85777778	18.68666667	18.61111111	18.26444444	18.54666667	18.60777778	19.05555556	18.58333333	18.68333333	18.80888889	18.55555556	18.74888889	18.64333333	18.56	18.74333333	18.39555556	18.42222222	18.32222222	18.53	18.40888889	18.43888889	18.48555556	18.29444444	18.25555556	18.22	18.47555556	18.63888889	18.02333333	17.83111111	17.91777778	17.89222222	17.21666667	17.70555556	17.59222222	17.96333333
8/11/2019 12:03:31	-118.5137514	42.54337643	1232.140806	-118.5137259	42.54336609	1226.391016	-118.5137385	42.54336345	1228.856548	8/11/2019 12:04:30	17.76444444	17.91111111	17.91555556	18.27555556	18.20444444	18.04333333	17.99888889	17.61	18	18.00888889	18.41777778	18.04555556	18.04666667	18.14777778	17.89111111	18.15111111	18.02888889	17.95111111	18.03333333	17.60777778	17.82333333	17.70111111	17.78666667	17.71666667	17.82333333	17.74444444	17.64222222	17.50666667	17.53	17.67555556	17.96111111	17.29555556	17.11555556	16.85444444	16.94111111	16.26444444	17.07111111	16.91	17.28333333
8/11/2019 12:03:32	-118.513717	42.54336663	1231.492129	-118.5136916	42.54335641	1225.771665	-118.513704	42.54335395	1228.211097	8/11/2019 12:04:31	19.13888889	19.29777778	19.22888889	19.57777778	19.53555556	19.42111111	19.32888889	18.91777778	19.39666667	19.42888889	19.78666667	19.37666667	19.36444444	19.55444444	19.34666667	19.51555556	19.41888889	19.30444444	19.43555556	19.05777778	19.23888889	19.07111111	19.24333333	19.2	19.19222222	19.24666667	19.05333333	18.95222222	18.96333333	19.12111111	19.42222222	18.87	18.71	18.47777778	18.35	17.75444444	18.40777778	18.36222222	18.55333333
8/11/2019 12:03:33	-118.5136894	42.54335858	1230.83729	-118.5136635	42.54334829	1225.12361	-118.513676	42.54334597	1227.539774	8/11/2019 12:04:32	17.91555556	18.00666667	17.89111111	18.32333333	18.30222222	18.16777778	17.97222222	17.67333333	18.07888889	18.06444444	18.40444444	17.97777778	18.07111111	18.23888889	17.88888889	18.15111111	18.06888889	18.00666667	18.11555556	17.7	17.91666667	17.69888889	17.79111111	17.92111111	17.85333333	17.81444444	17.59111111	17.62555556	17.57666667	17.81333333	18.05	17.58777778	17.29666667	17.47888889	17.25777778	16.51111111	17.07111111	17.09555556	17.22
8/11/2019 12:03:34	-118.5136659	42.54335213	1230.183871	-118.5136401	42.54334183	1224.528787	-118.513653	42.54333929	1226.913065	8/11/2019 12:04:33	17.05444444	17.29333333	17.29888889	17.50777778	17.46	17.31	17.28666667	16.93	17.28444444	17.23777778	17.71888889	17.33222222	17.30333333	17.40333333	17.23555556	17.41222222	17.34	17.24222222	17.35	16.93888889	17.13555556	17.05666667	17.13555556	17.04888889	17.12777778	17.07888889	16.98	16.82777778	16.79333333	17.10777778	17.24	16.69333333	16.58222222	16.55333333	16.51222222	15.88777778	16.76	16.41777778	16.61333333
8/11/2019 12:03:35	-118.5136456	42.5433489	1229.526806	-118.5136197	42.54333848	1223.943335	-118.5136329	42.54333578	1226.294226	8/11/2019 12:04:34	17.37777778	17.43222222	17.34555556	17.49777778	17.49666667	17.42	17.26888889	16.96555556	17.21555556	17.3	17.69444444	17.29777778	17.30777778	17.39111111	17.12666667	17.34666667	17.18888889	17.18111111	17.24222222	16.88333333	17.07555556	16.94666667	17.09222222	16.93444444	17.02444444	17.09333333	16.89666667	16.89111111	16.67	17.01444444	17.14111111	16.69777778	16.45	16.59111111	16.60666667	16.13444444	16.58	16.33	16.75888889
8/11/2019 12:03:36	-118.513628	42.54334663	1228.94429	-118.5136021	42.54333611	1223.409477	-118.5136156	42.54333343	1225.715323	8/11/2019 12:04:35	18.9	18.995	18.795	19.4	19.352	19.123	18.984	18.746	19.005	18.984	19.467	19.034	19.006	19.219	18.95	19.147	19.034	18.869	19.061	18.612	18.834	18.689	18.782	18.714	18.739	18.769	18.608	18.541	18.397	18.638	18.928	18.283	18.098	18.3	18.194	17.353	17.962	18.034	18.036
8/11/2019 12:03:37	-118.5136096	42.54334296	1228.4572	-118.5135831	42.54333223	1222.93908	-118.5135974	42.54332995	1225.199667	8/11/2019 12:04:36	16.98444444	16.99777778	17.00888889	17.35	17.30888889	17.26222222	17.08555556	16.7	17.03777778	17.04111111	17.49777778	17.00555556	16.99111111	17.17777778	16.92111111	17.11333333	17.02444444	16.96	17.02222222	16.67888889	16.83111111	16.63888889	16.87222222	16.77	16.80666667	16.85111111	16.50333333	16.60888889	16.63333333	16.65777778	17.02111111	16.40777778	16.19888889	16.30888889	16.15333333	15.72333333	16.11222222	16.05111111	16.07
8/11/2019 12:03:38	-118.5135881	42.54333724	1228.005161	-118.5135619	42.54332647	1222.537229	-118.5135764	42.54332458	1224.761581	8/11/2019 12:04:37	19.02555556	19.29777778	19.08333333	19.35444444	19.37333333	19.29222222	19.18444444	18.78777778	19.01444444	19.13222222	19.46777778	19.10666667	19.00777778	19.24	18.99333333	19.12	19.06666667	18.99666667	19.05111111	18.63333333	18.80333333	18.66333333	18.71333333	18.76333333	18.75444444	18.87555556	18.60222222	18.49	18.5	18.61888889	18.95555556	18.39333333	18.06666667	17.98888889	18.01333333	17.48555556	17.90111111	17.99222222	17.89
8/11/2019 12:03:39	-118.5135665	42.5433314	1227.505355	-118.5135402	42.54332043	1222.092594	-118.5135545	42.54331878	1224.306903	8/11/2019 12:04:38	19.81888889	19.70111111	19.82777778	20.14333333	20.23777778	19.96111111	19.94	19.39555556	19.73777778	19.78666667	20.17666667	19.79555556	19.78888889	19.86666667	19.70222222	19.79333333	19.76888889	19.69444444	19.74888889	19.36111111	19.54444444	19.34555556	19.42	19.45	19.47333333	19.50888889	19.20111111	19.06333333	19.19222222	19.31444444	19.61	18.93666667	18.79111111	18.87	18.95555556	18.34555556	18.63222222	18.59666667	18.80888889
8/11/2019 12:03:40	-118.5135464	42.54332563	1227.03629	-118.5135202	42.54331452	1221.695252	-118.5135343	42.54331322	1223.866548	8/11/2019 12:04:39	20.39333333	20.48777778	20.62888889	20.93222222	20.69	20.63555556	20.47777778	20.18777778	20.43444444	20.54333333	20.91888889	20.5	20.51111111	20.60333333	20.40777778	20.60333333	20.48222222	20.28333333	20.47	20.04444444	20.19777778	20.12222222	20.14666667	20.14777778	20.18	20.06111111	19.89888889	19.85222222	19.82	19.99111111	20.23555556	19.65444444	19.48444444	19.59777778	19.22111111	18.84666667	19.17222222	19.09333333	19.26222222
8/11/2019 12:03:41	-118.5135278	42.54331984	1226.7244	-118.5135013	42.54330834	1221.477197	-118.5135152	42.54330724	1223.594	8/11/2019 12:04:40	18.17111111	18.27	18.12	18.46444444	18.41333333	18.37777778	18.23444444	17.76777778	18.18555556	18.20222222	18.61111111	18.15555556	18.18222222	18.23222222	18.05111111	18.21111111	18.10666667	18.00888889	18.07888889	17.57666667	17.82888889	17.64444444	17.89666667	17.81777778	17.75666667	17.78555556	17.57777778	17.50333333	17.57333333	17.62333333	17.97222222	17.41888889	17.19	17.28888889	17.08666667	16.31333333	17.15777778	16.88777778	17.06333333
8/11/2019 12:03:42	-118.5135104	42.54331475	1226.439903	-118.5134841	42.54330318	1221.251881	-118.5134975	42.54330188	1223.344355	8/11/2019 12:04:41	15.99777778	16.11555556	16.18888889	16.30333333	16.3	16.24555556	16.05222222	15.67333333	16.09222222	16.14111111	16.37	16.06777778	16.04111111	16.12111111	15.97222222	16.14111111	15.93444444	15.87111111	15.92	15.64222222	15.74	15.51111111	15.67777778	15.61222222	15.67555556	15.61333333	15.46555556	15.34555556	15.33333333	15.47666667	15.74222222	15.15222222	14.98888889	14.95888889	15.27666667	14.44666667	15.13111111	14.70222222	15.04777778
8/11/2019 12:03:43	-118.5134951	42.54331087	1226.222871	-118.5134691	42.5432992	1221.11061	-118.5134818	42.54329755	1223.175258	8/11/2019 12:04:42	15.59333333	15.69888889	15.76	15.90222222	15.85333333	15.71666667	15.54888889	15.15777778	15.44666667	15.56333333	15.88111111	15.49555556	15.44444444	15.61555556	15.20777778	15.53	15.36	15.23222222	15.35444444	14.86777778	15.13555556	14.96222222	15.08777778	15.02333333	14.99888889	14.98777778	14.72	14.78555556	14.76333333	14.77444444	15.15777778	14.53	14.32666667	14.46222222	14.52333333	13.84777778	14.35888889	14.20444444	14.47333333
8/11/2019 12:03:44	-118.5134851	42.54330892	1225.797742	-118.5134586	42.5432971	1220.753452	-118.5134711	42.54329524	1222.855484	8/11/2019 12:04:43	15.94888889	16.05333333	16.20777778	16.24333333	16.45777778	16.18666667	16.06222222	15.67555556	15.96222222	15.94777778	16.28666667	15.92333333	15.94555556	16.04222222	15.78	15.88777778	15.80222222	15.70555556	15.79	15.40111111	15.53111111	15.42	15.47333333	15.47444444	15.47111111	15.49555556	15.20888889	15.17777778	15.16	15.27666667	15.57111111	15.09666667	14.85777778	14.95222222	15.19222222	14.24777778	15.13888889	14.56111111	14.62
8/11/2019 12:03:45	-118.5134826	42.54330979	1225.552419	-118.513456	42.5432979	1220.519713	-118.5134697	42.54329555	1222.771774	8/11/2019 12:04:44	16.011	15.984	16.067	16.295	16.151	16.085	15.934	15.512	15.735	15.714	16.212	15.805	15.695	15.878	15.678	15.781	15.653	15.566	15.696	15.156	15.366	15.329	15.419	15.284	15.208	15.304	14.982	15.013	15.049	15.18	15.422	14.82	14.559	14.753	14.728	14.109	14.694	14.535	14.532
8/11/2019 12:03:46	-118.5134798	42.54330966	1225.365633	-118.5134531	42.54329764	1220.32204	-118.5134666	42.54329564	1222.5848	8/11/2019 12:04:45	16.03666667	16.06666667	16.17777778	16.42	16.26777778	16.20111111	16.03111111	15.68222222	15.93777778	15.85444444	16.37888889	15.89333333	15.89	15.93777778	15.71888889	15.92555556	15.80111111	15.68777778	15.69888889	15.33555556	15.52666667	15.39777778	15.40888889	15.40777778	15.39888889	15.32555556	15.17444444	15.16444444	15.05	15.30666667	15.51555556	14.93444444	14.62333333	14.82	15.08	14.14333333	15.02111111	14.42333333	14.74
8/11/2019 12:03:47	-118.5134742	42.54330816	1225.150806	-118.5134473	42.54329594	1220.096923	-118.5134604	42.54329405	1222.319548	8/11/2019 12:04:46	17.35333333	17.13	17.31666667	17.55222222	17.64888889	17.37	17.32	16.88666667	17.21222222	17.29888889	17.53333333	17.22222222	17.21333333	17.26333333	17.01111111	17.15777778	17.09	17.00777778	17.14	16.71777778	16.86222222	16.68	16.90333333	16.87	16.82111111	16.77888889	16.57444444	16.46	16.44333333	16.68444444	16.89111111	16.38	16.19888889	16.12666667	16.26222222	15.47	16.19111111	16.03888889	16.13777778
8/11/2019 12:03:48	-118.5134661	42.54330585	1224.917935	-118.5134393	42.54329359	1219.848142	-118.5134521	42.54329186	1222.036258	8/11/2019 12:04:47	25.51222222	25.73222222	25.40666667	25.90111111	25.84333333	25.71777778	25.52666667	25.21666667	25.47111111	25.56555556	25.86555556	25.55777778	25.56444444	25.60555556	25.36	25.50222222	25.49777778	25.43	25.47888889	25.21111111	25.18444444	25.09	25.34888889	25.20555556	25.26444444	25.25444444	25.10555556	24.94444444	24.89888889	25.00888889	25.38555556	24.82222222	24.66111111	24.69222222	24.44333333	24.02444444	24.36888889	24.44777778	24.57222222
8/11/2019 12:03:49	-118.513458	42.54330368	1224.6286	-118.513431	42.54329127	1219.554107	-118.5134436	42.54328958	1221.719033	8/11/2019 12:04:48	32.43333333	32.61444444	32.39222222	32.85777778	32.65555556	32.72888889	32.43555556	32.21555556	32.48333333	32.57888889	32.82333333	32.49222222	32.36666667	32.49	32.28444444	32.37555556	32.27666667	32.17777778	32.23888889	31.82666667	32.02777778	31.88777778	32.01222222	32.03222222	32.10555556	31.96222222	31.80111111	31.63777778	31.68111111	31.87	32.15555556	31.69	31.39111111	31.40333333	31.14111111	30.56444444	31.04	30.81111111	31.19111111
8/11/2019 12:03:50	-118.5134518	42.54330346	1224.34496	-118.5134251	42.54329088	1219.322724	-118.5134376	42.54328912	1221.45816	8/11/2019 12:04:49	17.87888889	17.76111111	17.77	18.10666667	18.08222222	17.91555556	17.72888889	17.37444444	17.74	17.63777778	18.12111111	17.65666667	17.7	17.78111111	17.51333333	17.68333333	17.57555556	17.45888889	17.63333333	17.19555556	17.27	17.20777778	17.32	17.26777778	17.21888889	17.25333333	17.06666667	16.96666667	16.93333333	17.11666667	17.38	16.87444444	16.60444444	16.68777778	16.71888889	16.09222222	16.86888889	16.54222222	16.5
8/11/2019 12:03:51	-118.5134494	42.54330454	1224.106081	-118.5134228	42.54329183	1219.085611	-118.5134354	42.54328972	1221.308811	8/11/2019 12:04:50	13.42666667	13.50666667	13.51888889	13.66444444	13.73222222	13.51222222	13.57666667	13.18444444	13.46222222	13.49	13.89777778	13.46888889	13.54666667	13.68	13.48111111	13.68222222	13.58111111	13.58777778	13.71222222	13.32888889	13.52333333	13.36666667	13.60777778	13.52	13.57	13.63777778	13.51666667	13.48333333	13.42222222	13.69444444	13.95555556	13.49555556	13.24555556	13.43333333	13.46	12.54555556	13.41222222	13.19	13.31888889
8/11/2019 12:03:52	-118.5134508	42.5433046	1223.900516	-118.5134241	42.54329173	1218.881577	-118.5134363	42.54328965	1221.169419	8/11/2019 12:04:51	6.198888889	6.364444444	6.261111111	6.76	6.817777778	6.537777778	6.405555556	5.988888889	6.391111111	6.408888889	6.903333333	6.495555556	6.543333333	6.792222222	6.485555556	6.717777778	6.598888889	6.568888889	6.862222222	6.347777778	6.583333333	6.44	6.658888889	6.628888889	6.682222222	6.842222222	6.512222222	6.671111111	6.7	6.834444444	7.118888889	6.507777778	6.33	6.561111111	6.833333333	6.071111111	7.03	6.544444444	6.578888889
8/11/2019 12:03:53	-118.5134528	42.54330426	1223.683935	-118.5134261	42.54329142	1218.6236	-118.5134381	42.54328924	1220.880419	8/11/2019 12:04:52	-0.04	0.056	0.162	0.743	0.666	0.389	0.264	-0.123	0.176	0.225	0.537	0.16	0.335	0.438	0.258	0.402	0.368	0.215	0.325	-0.01	0.144	0.164	0.333	0.324	0.246	0.439	0.276	0.273	0.24	0.491	0.799	0.265	0.097	0.7	0.879	0.001	0.896	0.3	0.6
8/11/2019 12:03:54	-118.5134532	42.54330428	1223.6648	-118.5134263	42.54329135	1218.56586	-118.5134384	42.54328922	1220.803	8/11/2019 12:04:53	0.12	0.043333333	0.016666667	0.655555556	0.523333333	0.281111111	0.178888889	-0.141111111	0.086666667	0.151111111	0.486666667	0.176666667	0.157777778	0.308888889	0.102222222	0.378888889	0.234444444	0.15	0.318888889	-0.09	0.19	0.184444444	0.231111111	0.163333333	0.186666667	0.388888889	0.118888889	0.214444444	0.21	0.437777778	0.761111111	0.188888889	0.082222222	0.475555556	0.977777778	0.056666667	0.911111111	0.352222222	0.473333333
[truncated: 101 more columns]
