# Supplementary material
Source: MDPI journal article supplement (https://www.mdpi.com/2072-4292/13/5/1035)
Supplement: s1 [file s1 › supporting_data/fly033sec-ahs7-matched.csv]

datetime	long	lat	elev_msl	date	timezulu	timepac	datepac	datetimenr	940.046	946.742	953.407	960.04	966.642	973.214	979.755	986.266	992.747	999.199	1005.621	1012.015	1018.38	1024.718	1031.027	1037.309	1043.564	1049.792	1055.994	1062.169	1068.319	1074.443	1080.542	1086.616	1092.666	1098.692	1104.694	1110.672	1116.627	1122.559	1128.469	1134.357	1140.223	1146.067	1151.89	1157.693	1163.475	1169.236	1174.978	1180.701	1186.404
8/11/2019 12:42:20	-118.5134682	42.54331324	1221.907323	8/11/19	0.821064815	0.529398148	8/11/19 12:42	12:43:18	17.76777778	17.33777778	17.35111111	17.21	17.46555556	17.27111111	17.28444444	17.37444444	17.05111111	16.81777778	17.03888889	17.17	17.35	16.91555556	17.17666667	16.80444444	16.69777778	16.67333333	16.65666667	17.11666667	16.79888889	16.86888889	16.47444444	16.79444444	16.53	16.29111111	16.35666667	16.56777778	16.58555556	16.23888889	16.27555556	15.87666667	16.06	15.83777778	15.48111111	15.51333333	16.05777778	15.76222222	15.86111111	15.55	15.83444444
8/11/2019 12:42:21	-118.51347	42.54331774	1222.7256	8/11/19	0.821076389	0.529409722	8/11/19 12:42	12:43:19	16.47	15.92333333	15.99888889	15.84555556	16.01888889	15.72666667	15.80444444	15.77222222	15.49777778	15.30444444	15.44	15.67	15.80222222	15.35333333	15.59777778	15.24111111	15.09555556	15.10555556	14.92333333	15.48555556	15.16888889	15.19444444	14.86888889	15.08111111	14.88333333	14.71111111	14.67666667	14.94444444	14.76333333	14.53555556	14.48555556	14.00555556	14.26111111	14.16222222	14.10777778	13.92444444	14.58222222	14.16666667	14.41	13.79666667	14.24777778
8/11/2019 12:42:22	-118.5134698	42.54332094	1223.36829	8/11/19	0.821087963	0.529421296	8/11/19 12:42	12:43:20	18.00555556	17.46888889	17.55333333	17.58	17.44111111	17.34222222	17.54333333	17.50555556	17.20222222	16.79111111	17.03333333	17.27888889	17.43444444	16.89555556	17.16444444	16.88444444	16.69555556	16.78888889	16.61666667	17.11	16.81	16.83777778	16.56222222	16.70777778	16.52666667	16.30111111	16.24222222	16.44888889	16.47666667	16.21555556	16.11555556	15.63666667	15.99	15.84444444	15.84888889	15.38777778	15.96222222	15.71777778	15.86777778	15.48555556	15.67888889
8/11/2019 12:42:23	-118.5134782	42.54332468	1224.044355	8/11/19	0.821099537	0.52943287	8/11/19 12:42	12:43:21	18.43111111	17.72222222	18.00888889	17.86111111	17.94666667	17.72888889	17.91222222	17.82	17.55	17.20777778	17.45666667	17.61222222	17.79333333	17.35111111	17.63	17.18222222	17.12444444	17.13222222	17.03333333	17.49	17.26777778	17.19444444	16.98777778	17.19666667	16.98444444	16.80666667	16.73555556	16.99777778	16.84222222	16.71	16.61111111	16.12	16.45	16.35444444	16.16888889	15.77888889	16.71777778	16.27888889	16.19111111	15.98111111	16.18888889
8/11/2019 12:42:24	-118.5134982	42.54333062	1224.775774	8/11/19	0.821111111	0.529444444	8/11/19 12:42	12:43:22	19.23	18.63222222	18.63888889	18.67444444	18.84666667	18.56444444	18.73777778	18.66111111	18.30888889	18.17333333	18.41	18.52222222	18.69	18.28111111	18.50555556	18.19	18.05222222	18.17111111	17.89	18.44222222	18.13777778	18.15555556	17.83222222	18.11222222	17.90555556	17.73666667	17.64888889	17.86444444	17.87111111	17.55222222	17.48777778	17.07888889	17.45333333	17.18666667	17.25	16.27333333	17.13333333	17.06	17.31222222	16.82111111	17.18888889
8/11/2019 12:42:25	-118.5135198	42.54333755	1225.44672	8/11/19	0.821122685	0.529456019	8/11/19 12:42	12:43:23	19.63111111	18.92222222	19.08444444	19.14555556	19.08	18.86111111	19.02444444	18.97555556	18.79555556	18.43111111	18.69555556	18.96444444	19.08111111	18.64444444	18.90444444	18.51111111	18.45444444	18.40888889	18.21111111	18.77777778	18.47555556	18.47666667	18.25222222	18.34777778	18.30555556	18.12555556	18.05222222	18.16888889	18.2	17.92666667	17.81111111	17.35111111	17.67444444	17.48222222	17.30111111	16.72111111	17.67555556	17.35222222	17.5	17.16888889	17.33777778
8/11/2019 12:42:26	-118.5135453	42.5433459	1226.211333	8/11/19	0.821134259	0.529467593	8/11/19 12:42	12:43:24	19.55125	18.86375	19.01875	18.825	18.92125	18.8225	19.01625	18.95125	18.68375	18.52875	18.7175	18.9075	19.0025	18.62125	18.7625	18.49625	18.40125	18.42375	18.25	18.74875	18.5025	18.55	18.32	18.45875	18.30625	18.04125	18.03875	18.22625	18.20625	17.92625	17.9	17.435	17.71125	17.54375	17.29125	16.82875	17.60625	17.4625	17.5825	17.085	17.42875
8/11/2019 12:42:27	-118.5135745	42.54335584	1226.971226	8/11/19	0.821145833	0.529479167	8/11/19 12:42	12:43:25	18.43111111	18.08111111	17.96444444	17.93666667	18.04666667	17.74888889	17.93444444	17.89444444	17.72777778	17.43	17.61555556	17.85333333	18.01111111	17.49111111	17.81555556	17.53111111	17.37555556	17.33666667	17.26777778	17.70555556	17.5	17.50888889	17.21888889	17.36777778	17.25	16.96	17.06777778	17.20777778	17.24444444	16.93	16.91111111	16.48222222	16.84444444	16.46555556	16.44	15.94222222	16.81111111	16.54888889	16.58444444	16.29777778	16.55111111
8/11/2019 12:42:28	-118.5136017	42.54336534	1227.673548	8/11/19	0.821157407	0.529490741	8/11/19 12:42	12:43:26	18.50111111	17.96777778	17.95666667	17.89111111	18.17111111	17.88333333	18.03	18.04	17.74666667	17.37	17.60333333	17.78555556	17.97555556	17.56111111	17.75111111	17.50666667	17.31111111	17.38111111	17.19111111	17.70222222	17.47222222	17.49444444	17.26111111	17.45444444	17.31333333	17.07777778	17.06	17.20888889	17.23444444	16.90888889	16.98555556	16.43777778	16.90222222	16.59888889	16.69222222	16.05111111	16.85111111	16.50888889	16.76666667	16.27333333	16.53
8/11/2019 12:42:29	-118.5136284	42.54337498	1228.383774	8/11/19	0.821168981	0.529502315	8/11/19 12:42	12:43:27	20.56555556	20.02222222	20.06111111	20.09333333	20.12444444	19.98111111	20.07222222	20.13888889	19.79777778	19.55222222	19.80444444	19.97111111	20.15333333	19.80333333	19.99333333	19.73111111	19.57777778	19.68888889	19.46666667	19.95666667	19.68666667	19.76	19.58555556	19.70333333	19.64	19.39222222	19.30111111	19.55777778	19.54444444	19.27666667	19.21222222	18.83	19.20222222	19.03333333	18.88	18.16888889	18.92444444	18.77777778	18.93333333	18.28111111	18.87444444
8/11/2019 12:42:30	-118.5136536	42.54338474	1228.9174	8/11/19	0.821180556	0.529513889	8/11/19 12:42	12:43:28	20.43444444	20.07888889	20.12	20.02333333	20.06555556	19.83444444	19.97777778	20.08333333	19.75222222	19.52888889	19.75444444	19.93555556	20.09	19.60111111	19.92777778	19.65666667	19.45333333	19.57555556	19.39444444	19.93111111	19.62666667	19.67888889	19.37555556	19.54	19.41111111	19.19333333	19.24111111	19.46111111	19.41333333	19.21555556	19.13333333	18.64555556	18.98	18.88	18.81777778	17.96333333	18.95666667	18.60777778	18.74111111	18.31555556	18.71111111
8/11/2019 12:42:31	-118.5136765	42.5433942	1228.94328	8/11/19	0.82119213	0.529525463	8/11/19 12:42	12:43:29	21.94555556	21.33222222	21.23888889	21.1	21.38333333	21.13666667	21.30111111	21.21333333	21.02777778	20.83	21.01444444	21.24222222	21.37222222	21.11444444	21.38666667	20.91555556	20.83111111	20.88111111	20.76888889	21.25111111	20.95888889	21.04333333	20.79	20.90333333	20.82333333	20.58555556	20.63888889	20.79888889	20.83888889	20.60333333	20.38111111	20.11888889	20.47	20.21555556	19.88	19.30222222	20.18111111	19.91666667	19.95333333	19.75444444	20.11888889
8/11/2019 12:42:32	-118.513704	42.54340615	1228.886459	8/11/19	0.821203704	0.529537037	8/11/19 12:42	12:43:30	20.78444444	20.22444444	20.49	20.26444444	20.44222222	20.10666667	20.3	20.27444444	20.04111111	19.72333333	19.89444444	20.25888889	20.32	19.96222222	20.30222222	19.86777778	19.89111111	19.86555556	19.68666667	20.21666667	19.99777778	20.00888889	19.72777778	19.85111111	19.78444444	19.58666667	19.58666667	19.81777778	19.72666667	19.47888889	19.38111111	18.97111111	19.40777778	19.16444444	18.96555556	18.36666667	19.32444444	18.80333333	19.00666667	18.90777778	18.91777778
8/11/2019 12:42:33	-118.5137364	42.54342022	1229.23429	8/11/19	0.821215278	0.529548611	8/11/19 12:42	12:43:31	20.19875	19.8025	19.92875	19.66125	19.64875	19.505	19.64375	19.73625	19.45875	19.09875	19.4	19.73125	19.81625	19.36625	19.66625	19.40625	19.245	19.2825	19.10875	19.6675	19.4725	19.45875	19.1675	19.39125	19.29	18.95625	18.97625	19.20625	19.27875	18.925	18.845	18.53625	18.86875	18.6325	18.105	18	18.5525	18.51875	18.64	18.29875	18.53
8/11/2019 12:42:34	-118.5137663	42.54343409	1230.298065	8/11/19	0.821226852	0.529560185	8/11/19 12:42	12:43:32	19.96888889	19.58111111	19.54666667	19.48222222	19.70666667	19.30222222	19.49666667	19.46	19.25444444	18.93333333	19.22888889	19.47333333	19.61666667	19.11	19.41	19.17222222	18.99111111	19.04777778	18.88888889	19.41888889	19.23777778	19.10888889	18.92777778	19.06666667	19.00666667	18.75777778	18.67666667	19.01333333	18.90444444	18.76444444	18.62888889	18.32444444	18.58	18.46	18.02555556	17.52444444	18.50111111	18.19333333	18.44666667	18.03	18.26444444
8/11/2019 12:42:35	-118.5137951	42.54344838	1231.3426	8/11/19	0.821238426	0.529571759	8/11/19 12:42	12:43:33	20.63	20.25	20.02625	20.09375	20.2	19.96625	20.12125	20.095	19.86875	19.5875	19.90625	20.07875	20.2875	19.75125	20.15	19.78375	19.67375	19.68625	19.605	20.07125	19.86375	19.93125	19.58875	19.73125	19.7125	19.51375	19.49125	19.795	19.72875	19.57625	19.39	19.02375	19.37125	19.0925	18.995	18.40875	19.21375	19.08	18.94	18.77875	19.07875
8/11/2019 12:42:36	-118.5138235	42.54346414	1232.284313	8/11/19	0.82125	0.529583333	8/11/19 12:42	12:43:34	20.18625	19.3275	19.5825	19.625	19.67625	19.36625	19.6675	19.68625	19.31625	19.095	19.38125	19.64	19.685	19.3175	19.54625	19.235	19.09375	19.14125	19.06125	19.545	19.32875	19.29	19.05	19.135	19.10375	18.9275	18.89	19.07	19.18	18.865	18.82625	18.3625	18.76625	18.4775	17.97625	17.73875	18.53375	18.295	18.4975	18.1025	18.49375
8/11/2019 12:42:37	-118.5138521	42.54347979	1233.338167	8/11/19	0.821261574	0.529594907	8/11/19 12:42	12:43:35	19.84444444	19.30888889	19.25111111	19.23333333	19.42333333	19.12222222	19.31	19.27888889	18.96444444	18.83333333	18.99666667	19.23222222	19.39444444	18.93666667	19.24555556	18.88555556	18.76555556	18.79333333	18.66777778	19.20555556	19.02111111	18.97666667	18.71111111	18.81111111	18.72222222	18.53666667	18.56333333	18.74666667	18.76555556	18.48	18.51111111	18.06222222	18.39555556	18.17444444	18.06222222	17.50555556	18.35111111	18.12	18.23333333	17.68	18.07666667
8/11/2019 12:42:38	-118.5138798	42.54349624	1234.372871	8/11/19	0.821273148	0.529606481	8/11/19 12:42	12:43:36	22.06555556	21.87333333	21.64222222	21.77222222	21.77444444	21.58	21.70777778	21.71333333	21.51777778	21.23555556	21.41555556	21.74111111	21.93333333	21.37333333	21.76222222	21.37222222	21.22333333	21.33777778	21.14777778	21.65222222	21.38	21.43555556	21.22111111	21.23666667	21.11333333	20.97	21.06	21.28111111	21.13777778	20.82777778	20.75888889	20.42777778	20.84333333	20.37444444	20.10666667	19.70777778	20.60444444	20.23777778	20.47111111	19.96666667	20.58888889
8/11/2019 12:42:39	-118.5139093	42.54351292	1235.428	8/11/19	0.821284722	0.529618056	8/11/19 12:42	12:43:37	25.84	25.405	25.59125	25.48875	25.60125	25.33	25.67625	25.55625	25.18125	25	25.23875	25.495	25.61875	25.25	25.505	25.115	24.93875	25.025	24.89	25.33125	25.205	25.115	24.93625	24.99375	24.99	24.66625	24.75375	24.9	24.81875	24.605	24.41625	24.18375	24.57125	24.01125	23.9725	23.46375	24.13375	23.80625	24.1875	23.7875	24.2775
8/11/2019 12:42:40	-118.5139392	42.54352987	1236.391194	8/11/19	0.821296296	0.52962963	8/11/19 12:42	12:43:38	29.98888889	29.59777778	29.62666667	29.48111111	29.66333333	29.4	29.65111111	29.68444444	29.3	29.09666667	29.27888889	29.68666667	29.78333333	29.27111111	29.62444444	29.21777778	28.91666667	29.03222222	28.71666667	29.35222222	29.01888889	29.16333333	28.75555556	28.76777778	28.74111111	28.42333333	28.38222222	28.53	28.54666667	28.17111111	28.19555556	27.76222222	28.22444444	27.67888889	27.49888889	27.06888889	27.75222222	27.61222222	27.8	27.48777778	28.01666667
8/11/2019 12:42:41	-118.5139699	42.54354824	1237.274839	8/11/19	0.82130787	0.529641204	8/11/19 12:42	12:43:39	28.98666667	28.63111111	28.63111111	28.61444444	28.65555556	28.42555556	28.57666667	28.70444444	28.23444444	28.05666667	28.28666667	28.59777778	28.71111111	28.22222222	28.51888889	28.12555556	28.03555556	28.10666667	27.87333333	28.43444444	28.07444444	28.12222222	27.91111111	27.85	27.72222222	27.50222222	27.48	27.58888889	27.63	27.26222222	27.24444444	26.82222222	27.19333333	26.72666667	26.63777778	26.25333333	26.91	26.84111111	26.83333333	26.69222222	27.04555556
8/11/2019 12:42:42	-118.513998	42.54356535	1237.60448	8/11/19	0.821319444	0.529652778	8/11/19 12:42	12:43:40	28.09333333	27.67222222	27.71333333	27.83333333	27.68666667	27.50777778	27.73	27.63333333	27.31444444	27.09777778	27.32666667	27.58666667	27.76666667	27.33777778	27.72333333	27.15888889	27.17	27.20333333	27.11777778	27.53888889	27.25444444	27.37777778	26.96666667	26.93666667	27.00888889	26.76111111	26.75666667	26.82777778	26.73555556	26.57111111	26.60111111	26.03666667	26.61777778	26.10444444	25.95777778	25.15	25.93555556	25.88222222	26.18666667	25.79555556	26.29222222
8/11/2019 12:42:43	-118.5140303	42.5435842	1237.743833	8/11/19	0.821331019	0.529664352	8/11/19 12:42	12:43:41	27.25333333	26.78444444	26.69555556	26.68888889	26.62666667	26.53777778	26.73666667	26.74111111	26.49555556	26.14444444	26.44777778	26.68444444	26.84666667	26.39	26.70888889	26.32444444	26.12888889	26.25111111	26.03777778	26.73111111	26.29666667	26.36888889	26.16333333	26.18888889	26.01444444	25.75222222	25.76888889	25.97666667	26.00333333	25.69888889	25.67	25.16	25.59333333	24.97555556	24.98222222	24.69666667	25.27555556	25.12666667	25.30222222	24.97333333	25.41888889
8/11/2019 12:42:44	-118.5140667	42.54360522	1237.651806	8/11/19	0.821342593	0.529675926	8/11/19 12:42	12:43:42	21.33	21.0475	21.29375	21.0775	21.18	20.94625	21.185	21.13875	20.88875	20.6225	20.78625	21.09875	21.21125	20.85125	21.06875	20.71125	20.64	20.7025	20.5175	21.065	20.7725	20.82375	20.55	20.61875	20.61875	20.4475	20.3025	20.555	20.65625	20.3625	20.22875	19.755	20.1525	19.85625	19.64125	19.20125	20.01875	19.70625	20.12875	19.49625	19.95875
8/11/2019 12:42:45	-118.5141026	42.54361815	1237.557839	8/11/19	0.821354167	0.5296875	8/11/19 12:42	12:43:43	22.74333333	22.48	22.44111111	22.42555556	22.47444444	22.24111111	22.59777778	22.38222222	22.13	21.91888889	22.14666667	22.49777778	22.46888889	22.11666667	22.43	21.97888889	21.94777778	21.96888889	21.76777778	22.24777778	22.03222222	22.17	21.80111111	21.94	22.01888889	21.73777778	21.67	21.91444444	21.92	21.61666667	21.61222222	21.19777778	21.73444444	21.46	20.98666667	20.32666667	21.28111111	20.82	21.32777778	20.78111111	21.22
8/11/2019 12:42:46	-118.5141381	42.54362532	1237.624032	8/11/19	0.821365741	0.529699074	8/11/19 12:42	12:43:44	19.60444444	19.36	19.04888889	18.94111111	19.15555556	18.91888889	19.06333333	19.01111111	18.73666667	18.54555556	18.82888889	18.94888889	19.08777778	18.58555556	18.89666667	18.69777778	18.41333333	18.51111111	18.33888889	18.99	18.62444444	18.66666667	18.43222222	18.50777778	18.51222222	18.33444444	18.25777778	18.44444444	18.34888889	18.23	18.06888889	17.82444444	17.97777778	17.75222222	17.86777778	17.06777778	18.03111111	17.67444444	17.80777778	17.61111111	17.71777778
8/11/2019 12:42:47	-118.5141704	42.54363003	1237.676	8/11/19	0.821377315	0.529710648	8/11/19 12:42	12:43:45	19.46625	18.95625	18.97375	18.8575	19.005	18.8025	18.93375	19.03625	18.74	18.465	18.67625	18.8075	18.9475	18.63	18.8675	18.47125	18.455	18.5325	18.28875	18.8425	18.58125	18.55	18.32625	18.52625	18.42375	18.0725	18.1925	18.33125	18.37	18.07	18.045	17.5475	17.9225	17.69125	17.4075	17.20875	18.0375	17.58875	17.7775	17.6025	17.7825
8/11/2019 12:42:48	-118.5142	42.54363328	1237.6858	8/11/19	0.821388889	0.529722222	8/11/19 12:42	12:43:46	17.98375	17.42875	17.55625	17.44125	17.505	17.28625	17.51375	17.45125	17.0975	16.85625	17.00125	17.2925	17.445	16.93375	17.21125	16.9	16.79	16.7975	16.635	17.195	16.97125	16.93	16.58625	16.8375	16.64625	16.45625	16.51125	16.6575	16.725	16.40375	16.40625	16.005	16.27875	16.15	16.0175	15.6475	16.37	16.28375	16.18375	15.8875	16.175
8/11/2019 12:42:49	-118.514227	42.54363618	1237.590677	8/11/19	0.821400463	0.529733796	8/11/19 12:42	12:43:47	16.28375	15.6925	15.7875	15.635	15.755	15.47625	15.6075	15.625	15.3075	15.0175	15.25625	15.4375	15.56125	15.04875	15.3825	15.01875	14.97375	14.94875	14.7375	15.37875	15.03125	15.0175	14.79375	14.9675	14.705	14.56125	14.68125	14.80125	14.88375	14.4575	14.53	13.9575	14.6525	14.36	14.30125	13.9725	14.72625	14.22125	14.43	13.88125	14.265
8/11/2019 12:42:50	-118.5142405	42.54363872	1237.367226	8/11/19	0.821412037	0.52974537	8/11/19 12:42	12:43:48	16.25444444	15.66111111	15.84222222	15.62	15.70333333	15.39111111	15.59	15.57777778	15.34222222	15.08333333	15.23888889	15.40666667	15.56888889	15.11777778	15.41666667	14.98444444	14.90444444	14.86666667	14.75333333	15.27666667	15.02111111	15.03888889	14.72333333	14.91555556	14.77555556	14.50555556	14.56777778	14.79333333	14.66333333	14.39111111	14.35555556	14.05777778	14.35666667	14.52111111	14.28666667	14.00888889	14.72333333	14.08	14.41666667	14.01	14.15222222
8/11/2019 12:42:51	-118.5142449	42.5436409	1237.200258	8/11/19	0.821423611	0.529756944	8/11/19 12:42	12:43:49	16.21875	15.55875	15.53625	15.67625	15.55875	15.39375	15.50125	15.4675	15.0775	14.855	15.055	15.25	15.52125	15.035	15.255	14.85625	14.7825	14.8	14.58875	15.19125	14.8575	14.88625	14.57875	14.8	14.75875	14.3675	14.39125	14.6775	14.675	14.35625	14.31375	13.995	14.4875	14.1125	14.0175	13.755	14.59375	14.19	14.46	14.02625	14.065
8/11/2019 12:42:52	-118.5142545	42.54364474	1237.1236	8/11/19	0.821435185	0.529768519	8/11/19 12:42	12:43:50	16.43222222	15.87111111	15.83666667	15.68555556	15.74111111	15.48	15.75555556	15.65555556	15.27333333	15.00888889	15.28777778	15.45444444	15.59444444	15.09888889	15.40666667	15.04222222	14.88444444	14.92111111	14.70222222	15.34222222	15.06333333	15.06222222	14.77555556	14.93111111	14.79444444	14.55111111	14.60444444	14.83222222	14.83555556	14.59111111	14.50888889	14.02888889	14.54111111	14.15444444	14.28222222	13.85777778	14.84	14.25	14.39	13.97222222	14.23888889
8/11/2019 12:42:53	-118.5142672	42.54365085	1237.095871	8/11/19	0.821446759	0.529780093	8/11/19 12:42	12:43:51	16.46	16.0125	15.815	15.8625	15.95125	15.56625	15.85375	15.80875	15.425	15.165	15.3	15.60125	15.74375	15.16125	15.4675	15.21125	15.03125	15.1175	14.825	15.47875	15.0975	15.1675	14.88125	15.01375	14.84875	14.705	14.6475	14.855	14.835	14.6	14.41625	14.1725	14.78375	14.5225	14.3425	13.9975	14.84875	14.34875	14.5725	14.08625	14.42
8/11/2019 12:42:54	-118.5142824	42.54365835	1237.193355	8/11/19	0.821458333	0.529791667	8/11/19 12:42	12:43:52	16.53	16.13444444	16.02111111	15.99444444	16.07444444	15.85	16.01888889	16.02	15.68	15.32444444	15.48777778	15.76444444	15.85444444	15.32444444	15.61888889	15.34888889	15.16888889	15.21333333	15.02666667	15.58333333	15.32222222	15.34777778	15.00888889	15.12	15.05444444	14.79	14.82777778	15.11777778	14.99333333	14.77555556	14.65222222	14.36	14.77444444	14.59777778	14.80444444	14.13888889	15.1	14.53222222	14.57	14.52888889	14.51111111
8/11/2019 12:42:55	-118.5142977	42.54366535	1237.28425	8/11/19	0.821469907	0.529803241	8/11/19 12:42	12:43:53	16.96875	16.33125	16.465	16.40625	16.48875	16.09125	16.24375	16.2525	15.9	15.60625	15.72875	16.06625	16.13125	15.73875	15.93375	15.58	15.4825	15.56375	15.31625	15.88125	15.50875	15.6325	15.31	15.42625	15.32	15.10125	15.1225	15.36875	15.395	15.0025	15.04625	14.6475	14.965	15.0225	15.23375	14.585	15.24	14.9275	15.135	14.5475	14.82
8/11/2019 12:42:56	-118.5143149	42.54367357	1237.349027	8/11/19	0.821481481	0.529814815	8/11/19 12:42	12:43:54	17.37333333	16.76888889	17.02666667	16.7	16.63666667	16.48	16.65888889	16.63	16.27555556	16.05222222	16.11333333	16.41333333	16.47555556	16.04888889	16.36444444	15.98888889	15.83444444	15.86333333	15.75333333	16.24777778	15.91777778	15.96777778	15.67666667	15.84888889	15.77666667	15.44777778	15.52	15.72888889	15.80333333	15.34666667	15.41111111	14.95111111	15.39555556	15.60888889	15.46444444	15.04777778	15.94777778	15.32333333	15.45777778	14.95444444	15.17111111
8/11/2019 12:42:57	-118.5143362	42.543685	1237.399129	8/11/19	0.821493056	0.529826389	8/11/19 12:42	12:43:55	17.505	16.95625	17.10875	17.08375	17.03125	16.76625	16.92	16.9375	16.51375	16.22625	16.405	16.66375	16.72625	16.2925	16.6525	16.27875	16.14375	16.09625	15.91875	16.4425	16.17	16.19375	15.96625	16.09125	15.99	15.68875	15.70875	16.03375	15.9975	15.6825	15.5525	15.24625	15.54875	15.84	15.86125	15.18125	16.14125	15.45625	15.655	15.32875	15.3025
8/11/2019 12:42:58	-118.5143602	42.54369821	1237.449258	8/11/19	0.82150463	0.529837963	8/11/19 12:42	12:43:56	18.91	18.45444444	18.66777778	18.30222222	18.55666667	18.13888889	18.37444444	18.24444444	17.90666667	17.66888889	17.88777778	18.08333333	18.17888889	17.69555556	18.00111111	17.53777778	17.48	17.52888889	17.38888889	17.94111111	17.53333333	17.62	17.28666667	17.46777778	17.30777778	17.09555556	17.06222222	17.21	17.23111111	17.00777778	16.98777778	16.62444444	16.94666667	16.97111111	17.04	16.50222222	17.27	16.79555556	16.97111111	16.50444444	16.78777778
8/11/2019 12:42:59	-118.5143844	42.54371115	1237.52	8/11/19	0.821516204	0.529849537	8/11/19 12:42	12:43:57	21.72625	21.16	21.26625	21.16125	21.19125	20.84375	21.0125	20.96875	20.6975	20.34375	20.55875	20.91375	20.87875	20.52125	20.74375	20.3625	20.1625	20.205	19.9925	20.60625	20.36	20.27875	19.9425	20.13875	20.09875	19.78	19.7475	19.97	20.00625	19.57625	19.64125	19.23625	19.64	19.67625	19.68125	18.9975	19.84	19.42875	19.5775	19.15	19.235
8/11/2019 12:43:00	-118.5144108	42.54372545	1237.518667	8/11/19	0.821527778	0.529861111	8/11/19 12:43	12:43:58	22.31125	21.75	21.81625	21.74375	21.87625	21.3975	21.57875	21.535	21.15375	20.82125	21.08875	21.31875	21.48	20.91375	21.3275	20.8175	20.6575	20.72375	20.5775	21.14625	20.77125	20.83875	20.5175	20.58375	20.51625	20.2725	20.29125	20.4825	20.4275	19.9925	20.07375	19.69625	20.13125	20.15875	19.86625	19.7975	20.31	19.78625	19.8325	19.63625	19.70375
8/11/2019 12:43:01	-118.5144406	42.54374129	1237.595032	8/11/19	0.821539352	0.529872685	8/11/19 12:43	12:43:59	23.23	22.73555556	22.82777778	22.68222222	22.67111111	22.39111111	22.60333333	22.51111111	22.15888889	21.92	22.10666667	22.27222222	22.41888889	22.00333333	22.28	21.83777778	21.75888889	21.76222222	21.54111111	22.16333333	21.76777778	21.85	21.60777778	21.62	21.56666667	21.26888889	21.30333333	21.52666667	21.51444444	21.16	21.17333333	20.74666667	21.24333333	21.18444444	21.03888889	20.66666667	21.44333333	20.63777778	21.23555556	20.56333333	20.55333333
8/11/2019 12:43:02	-118.5144686	42.54375569	1237.682677	8/11/19	0.821550926	0.529884259	8/11/19 12:43	12:44:00	25.41125	24.61	24.71375	24.615	24.78375	24.32	24.50125	24.4225	24.07875	23.80875	24.0125	24.24375	24.36625	23.88875	24.07375	23.7175	23.6175	23.68	23.4725	23.94875	23.62875	23.65625	23.45625	23.53	23.51625	23.15	23.12125	23.39625	23.34	23.0425	23.05125	22.49625	23.1425	22.93	22.845	22.40375	23.065	22.63125	22.6475	22.17375	22.525
8/11/2019 12:43:03	-118.5144971	42.54377032	1237.701419	8/11/19	0.8215625	0.529895833	8/11/19 12:43	12:44:01	22.99	22.55	22.45714286	22.42142857	22.37	21.95857143	22.31285714	22.24714286	21.87285714	21.75428571	21.66714286	22.13857143	22.14142857	21.65285714	21.87571429	21.55428571	21.38571429	21.47428571	21.24	21.88428571	21.42428571	21.42428571	21.14714286	21.31714286	21.09	20.93	20.91571429	21.17714286	21.17	20.79571429	20.81285714	20.46285714	20.82428571	20.69857143	20.78	19.81714286	20.58571429	20.5	20.41142857	20.1	20.24571429
8/11/2019 12:43:04	-118.5145271	42.54378517	1237.728581	8/11/19	0.821574074	0.529907407	8/11/19 12:43	12:44:02	19.31111111	18.84	18.93888889	18.71222222	18.76222222	18.53444444	18.70333333	18.71222222	18.33333333	18.04888889	18.22777778	18.44666667	18.54888889	18.01333333	18.29888889	17.91111111	17.78777778	17.80222222	17.75	18.17444444	17.87444444	17.90333333	17.65444444	17.77555556	17.67888889	17.38333333	17.37555556	17.67777778	17.70222222	17.3	17.32555556	16.85333333	17.21888889	17.08777778	16.98	16.74444444	17.46555556	17.22888889	17.44	16.81	16.95777778
8/11/2019 12:43:05	-118.5145578	42.54379938	1237.6886	8/11/19	0.821585648	0.529918981	8/11/19 12:43	12:44:03	17.24375	16.7025	16.86625	16.65375	16.85625	16.4025	16.73	16.55	16.38125	16.065	16.14	16.32875	16.51875	16.06125	16.2475	15.9875	15.78	15.8875	15.59375	16.215	15.9375	15.965	15.685	15.84625	15.795	15.45375	15.415	15.69	15.59125	15.24125	15.3475	14.93625	15.3725	15.295	15.68375	14.77125	15.645	15.2475	15.31625	14.95625	15.2225
8/11/2019 12:43:06	-118.5145873	42.54381355	1237.555677	8/11/19	0.821597222	0.529930556	8/11/19 12:43	12:44:04	16.685	16.2625	16.22875	16.09875	16.03375	15.85125	16.035	15.96	15.615	15.34625	15.5675	15.765	15.8725	15.37875	15.63625	15.32625	15.14875	15.21625	15.13125	15.58625	15.27	15.36375	15.095	15.205	14.99375	14.88	14.905	15.1475	15.12375	14.89625	14.86375	14.35625	14.91125	14.88	14.91125	14.3525	15.31875	14.38875	14.9625	14.5425	14.7425
8/11/2019 12:43:07	-118.5146158	42.5438279	1237.410806	8/11/19	0.821608796	0.52994213	8/11/19 12:43	12:44:05	17.37222222	16.84888889	17.09666667	16.97444444	16.91555556	16.53888889	16.84444444	16.71444444	16.38555556	16.15777778	16.26111111	16.54222222	16.62666667	16.22888889	16.48555556	16.05111111	16.04333333	16.03333333	15.86111111	16.48	16.08777778	16.18444444	15.83333333	16.04111111	15.93888889	15.70888889	15.82555556	15.91	15.99333333	15.65666667	15.66111111	15.17	15.66	15.79444444	15.46333333	15	15.94111111	15.34666667	15.56666667	15.25111111	15.35777778
8/11/2019 12:43:08	-118.5146432	42.54384207	1237.324645	8/11/19	0.82162037	0.529953704	8/11/19 12:43	12:44:06	17.2925	16.70875	16.91375	16.645	16.935	16.51625	16.715	16.755	16.36	16.1575	16.335	16.49375	16.595	16.1525	16.5275	16.1575	15.9875	16.08125	15.80625	16.46	16.13875	16.20125	15.9825	16.0675	15.9125	15.665	15.73375	15.96875	15.99375	15.65625	15.58875	15.2725	15.755	15.6375	15.41	14.98375	16.025	15.41125	15.69375	15.285	15.3575
8/11/2019 12:43:09	-118.5146706	42.54385348	1237.2766	8/11/19	0.821631944	0.529965278	8/11/19 12:43	12:44:07	18.79777778	18.50444444	18.35	18.34333333	18.32444444	18.05666667	18.27111111	18.28111111	17.82555556	17.72	17.87333333	18.14111111	18.21333333	17.72111111	17.95111111	17.66666667	17.55333333	17.59333333	17.52111111	18.03333333	17.69777778	17.66555556	17.51333333	17.59	17.53666667	17.22555556	17.28	17.57555556	17.54	17.29666667	17.23666667	16.81444444	17.27333333	17.06555556	17.30111111	16.35666667	17.33777778	17.02888889	17.19333333	16.80222222	16.83555556
8/11/2019 12:43:10	-118.5146971	42.5438634	1237.309484	8/11/19	0.821643519	0.529976852	8/11/19 12:43	12:44:08	18.35	18.04	18.11375	17.91125	17.9675	17.775	17.93125	17.93875	17.6575	17.3575	17.55	17.82125	17.9075	17.41125	17.755	17.4125	17.2325	17.23375	17.145	17.6625	17.40125	17.3575	17.11375	17.24125	17.0775	16.87875	17.01375	17.0975	17.19375	16.84375	16.88125	16.23375	16.7825	16.70875	16.45625	16.13875	16.83	16.525	16.7575	16.26625	16.42875
8/11/2019 12:43:11	-118.5147241	42.54386491	1237.344226	8/11/19	0.821655093	0.529988426	8/11/19 12:43	12:44:09	18.53333333	17.92444444	18.01	17.91555556	18.03666667	17.76777778	17.86777778	17.97111111	17.59888889	17.35555556	17.52888889	17.79333333	17.87111111	17.49777778	17.64555556	17.33444444	17.16333333	17.28111111	17.09555556	17.71666667	17.32333333	17.4	17.09111111	17.24666667	17.12555556	16.89222222	16.86333333	17.13333333	17.10111111	16.80555556	16.69555556	16.39	16.85888889	16.64666667	16.43	16.17444444	17.00111111	16.48444444	16.56666667	16.25888889	16.32666667
8/11/2019 12:43:12	-118.514752	42.54385823	1237.336355	8/11/19	0.821666667	0.53	8/11/19 12:43	12:44:10	17.8425	17.535	17.4575	17.1925	17.22	17.115	17.26	17.1925	16.8525	16.69375	16.73625	17.1225	17.15125	16.555	16.87375	16.5725	16.415	16.5725	16.2975	16.89375	16.595	16.64875	16.37	16.47375	16.35625	16.20875	16.1475	16.34875	16.27375	16.03375	16.045	15.61	15.93125	15.80625	15.7625	15.35875	16.1225	15.71375	15.85875	15.53625	15.61375
8/11/2019 12:43:13	-118.5147769	42.54384956	1237.306	8/11/19	0.821678241	0.530011574	8/11/19 12:43	12:44:11	17.5625	16.83625	17.20625	17.0675	17.22	16.87	16.9825	17.0325	16.7825	16.4325	16.6925	16.95625	16.97875	16.585	16.8275	16.44375	16.27625	16.36875	16.2025	16.69	16.44	16.45125	16.1925	16.26625	16.215	15.975	15.93375	16.18625	16.16125	15.9075	15.80875	15.40875	15.8325	15.5675	15.665	15.18875	16.1825	15.55	15.6025	15.45875	15.5
8/11/2019 12:43:14	-118.5147868	42.54384507	1237.210452	8/11/19	0.821689815	0.530023148	8/11/19 12:43	12:44:12	17.86777778	17.38555556	17.53	17.35444444	17.47333333	17.22111111	17.31777778	17.36666667	16.98444444	16.66111111	16.88666667	17.09222222	17.19	16.79222222	17.05333333	16.72	16.57666667	16.64888889	16.51	16.95111111	16.64666667	16.58555556	16.38777778	16.54333333	16.6	16.20444444	16.22222222	16.44444444	16.38666667	16.21	16.02333333	15.73444444	16.14777778	16.07222222	15.85666667	15.40555556	16.19222222	15.76333333	16.11888889	15.51666667	15.74777778
8/11/2019 12:43:15	-118.5147854	42.54384207	1237.063452	8/11/19	0.821701389	0.530034722	8/11/19 12:43	12:44:13	17.9925	17.485	17.725	17.46625	17.37125	17.09125	17.36125	17.425	17.02625	16.7275	16.85625	17.09375	17.32625	16.81625	17.09	16.7575	16.5925	16.65625	16.50625	17.04375	16.78	16.7825	16.5225	16.66125	16.5425	16.33375	16.30125	16.50125	16.47	16.20625	16.1575	15.745	16.09	16.1725	16.135	15.67375	16.58125	15.95875	16.01125	15.69	15.795
8/11/2019 12:43:16	-118.5147794	42.5438371	1236.953645	8/11/19	0.821712963	0.530046296	8/11/19 12:43	12:44:14	17.88	17.5125	17.59625	17.345	17.35	17.0825	17.31625	17.2475	16.855	16.70375	16.77125	17.135	17.26625	16.76375	16.9825	16.64	16.58	16.56625	16.37875	17.01625	16.605	16.63125	16.335	16.43875	16.38375	16.26375	16.1975	16.355	16.33375	16.1225	16.15375	15.675	16.02375	16.10375	15.73375	15.47875	16.175	15.7925	16.17875	15.47875	15.7175
8/11/2019 12:43:17	-118.5147696	42.54383063	1236.833419	8/11/19	0.821724537	0.53005787	8/11/19 12:43	12:44:15	17.835	17.53375	17.42	17.59875	17.43625	17.12625	17.2425	17.23875	17.04875	16.65875	16.795	17.12	17.14	16.76875	16.975	16.6725	16.5425	16.5925	16.34	16.88625	16.6025	16.69125	16.40375	16.51625	16.36625	16.25125	16.11375	16.295	16.4225	16.02125	16.025	15.7475	15.945	16.11125	16.16375	15.4325	16.23	15.79375	15.74875	15.73375	15.6025
8/11/2019 12:43:18	-118.5147576	42.54382316	1236.7104	8/11/19	0.821736111	0.530069444	8/11/19 12:43	12:44:16	18.28222222	17.91888889	17.78888889	17.64444444	17.87222222	17.53222222	17.65111111	17.66666667	17.27888889	17.03333333	17.19	17.40222222	17.55666667	17.19111111	17.39	17.02666667	16.91555556	16.97444444	16.78555556	17.32222222	17.01666667	17.04666667	16.72555556	16.97444444	16.69444444	16.55444444	16.49111111	16.75555556	16.75888889	16.42222222	16.37888889	15.94555556	16.23666667	16.39111111	16.38888889	15.53666667	16.61555556	16.35555556	16.17666667	15.92888889	16.07555556
8/11/2019 12:43:19	-118.5147432	42.54381484	1236.612645	8/11/19	0.821747685	0.530081019	8/11/19 12:43	12:44:17	19.0975	18.51625	18.57	18.44125	18.5325	18.23125	18.305	18.31375	17.9225	17.59125	17.90625	18.05375	18.2025	17.74875	18.08	17.61125	17.54	17.575	17.33625	17.92	17.59625	17.57625	17.33375	17.5325	17.33	17.1375	17.22	17.3475	17.36375	17.0575	16.98125	16.55625	16.98375	16.74875	17.06625	16.4825	17.04875	16.78875	17.02	16.555	16.63875
8/11/2019 12:43:20	-118.5147274	42.54380578	1236.561484	8/11/19	0.821759259	0.530092593	8/11/19 12:43	12:44:18	18.935	18.45833333	18.565	18.65666667	18.65333333	18.20833333	18.405	18.32833333	17.97166667	17.76333333	17.94833333	18.17666667	18.33	17.83666667	18.02	17.58666667	17.50333333	17.66833333	17.45	17.88333333	17.58833333	17.605	17.265	17.48833333	17.37166667	17.09833333	17.10166667	17.41333333	17.385	16.99666667	16.99666667	16.575	16.985	16.81166667	16.99333333	16.37166667	17.06666667	16.84333333	16.97	16.65666667	16.705
8/11/2019 12:43:21	-118.5147107	42.5437964	1236.516387	8/11/19	0.821770833	0.530104167	8/11/19 12:43	12:44:19	20.03222222	19.37888889	19.36555556	19.16666667	19.35222222	19.02555556	19.23555556	19.21666667	18.84444444	18.49222222	18.70555556	18.96666667	19.06222222	18.56777778	18.89111111	18.50444444	18.41	18.35777778	18.19777778	18.74777778	18.41444444	18.42333333	18.13222222	18.26888889	18.13333333	17.99666667	17.88111111	18.14888889	18.07	17.84222222	17.73777778	17.40666667	17.64555556	17.63444444	17.92111111	17.08555556	18.06111111	17.43	17.68	17.19666667	17.34222222
8/11/2019 12:43:22	-118.5146948	42.54378788	1236.4768	8/11/19	0.821782407	0.530115741	8/11/19 12:43	12:44:20	20.61	20.17875	20.05875	19.975	19.86	19.65875	19.80125	19.88875	19.49125	19.1175	19.495	19.59	19.6125	19.18375	19.4625	19.155	18.99625	19.0425	18.8775	19.2675	19.05125	19.03	18.77375	18.92375	18.77125	18.5225	18.575	18.7475	18.73375	18.47375	18.41375	18.00375	18.2875	18.37875	18.45625	17.955	18.80875	18.32875	18.25	17.79	18.05875
8/11/2019 12:43:23	-118.5146802	42.54377965	1236.433452	8/11/19	0.821793981	0.530127315	8/11/19 12:43	12:44:21	21.83444444	21.29666667	21.43	21.21777778	21.16444444	20.92777778	21.09222222	21.04333333	20.61222222	20.34888889	20.49444444	20.71888889	20.90222222	20.46111111	20.61888889	20.27111111	20.16444444	20.17666667	20.00555556	20.53222222	20.10444444	20.31888889	19.99444444	19.97444444	19.94222222	19.69555556	19.65	19.91111111	19.98888889	19.61777778	19.50444444	19.06444444	19.51444444	19.43555556	19.59222222	19.13555556	19.66222222	19.33111111	19.24777778	19.19333333	19.36222222
8/11/2019 12:43:24	-118.5146661	42.54377192	1236.36971	8/11/19	0.821805556	0.530138889	8/11/19 12:43	12:44:22	23.0025	22.6675	22.4775	22.405	22.50375	22.08	22.20875	22.2	21.87125	21.57625	21.80625	21.9625	22.045	21.6175	21.9	21.55625	21.3625	21.3175	21.2375	21.6875	21.48625	21.435	21.16375	21.27	21.1775	20.84875	20.9625	21.1375	21.0375	20.7975	20.6975	20.39875	20.82	20.70375	20.78625	20.22375	20.865	20.485	20.595	20.14	20.24625
8/11/2019 12:43:25	-118.5146512	42.54376633	1236.343226	8/11/19	0.82181713	0.530150463	8/11/19 12:43	12:44:23	21.4775	20.97375	20.91625	20.79375	20.89625	20.57	20.7125	20.58125	20.35875	20.015	20.28375	20.4775	20.6275	20.0375	20.345	19.99	19.79125	19.7875	19.6775	20.1775	19.82875	19.79875	19.5825	19.81125	19.69375	19.37375	19.3925	19.6075	19.635	19.275	19.22375	18.745	19.18375	19.19375	19.39625	18.9425	19.515	18.9675	19.2475	18.95375	18.815
8/11/2019 12:43:26	-118.514637	42.54376036	1236.436129	8/11/19	0.821828704	0.530162037	8/11/19 12:43	12:44:24	21.745	21.16	21.18	21.04	21.08333333	20.715	20.94833333	20.82666667	20.4	20.11166667	20.34833333	20.52166667	20.67333333	20.265	20.485	20.20833333	20.03	20.09666667	19.90333333	20.48166667	20.125	20.11666667	19.85	20.00666667	19.81333333	19.55333333	19.615	19.77833333	19.675	19.50666667	19.515	19.005	19.43333333	19.56166667	19.515	19.235	19.61	19.15	19.28	19.08833333	19.10833333
8/11/2019 12:43:27	-118.5146233	42.5437546	1236.5066	8/11/19	0.821840278	0.530173611	8/11/19 12:43	12:44:25	20.94875	20.66875	20.65625	20.65625	20.5025	20.23125	20.4525	20.365	19.915	19.68375	19.90125	20.0675	20.1975	19.7675	19.94125	19.59875	19.54125	19.5	19.35375	19.88375	19.51875	19.5075	19.4075	19.50625	19.38875	19.09125	19.075	19.22875	19.26875	19.01625	19.00375	18.58	19.045	19.09125	19.38625	18.735	19.24125	18.8225	19.075	18.5175	18.70625
8/11/2019 12:43:28	-118.5146096	42.54374858	1236.591129	8/11/19	0.821851852	0.530185185	8/11/19 12:43	12:44:26	19.61222222	19.20777778	19.13666667	18.96444444	19.09444444	18.72111111	18.86111111	18.80111111	18.37222222	18.17	18.40555556	18.56444444	18.70666667	18.27111111	18.53555556	18.15	17.92555556	18.03333333	17.85222222	18.36444444	18.06	18.16888889	17.84777778	17.95444444	17.82888889	17.64666667	17.61	17.82333333	17.81888889	17.55666667	17.57666667	17.19111111	17.73333333	18.06333333	18.06111111	17.30777778	18.31111111	17.36	17.88	17.27333333	17.21555556
8/11/2019 12:43:29	-118.5145966	42.54374266	1236.600065	8/11/19	0.821863426	0.530196759	8/11/19 12:43	12:44:27	19.875	19.505	19.42875	19.42625	19.38875	19.0425	19.03875	18.99625	18.66875	18.3525	18.54375	18.82625	18.91875	18.46875	18.635	18.32875	18.2525	18.16125	18.06375	18.67125	18.2375	18.27625	18.07625	18.17	18.05125	17.7775	17.9575	18.0025	18.0125	17.68375	17.74625	17.2775	17.65875	17.7625	18.23125	17.7325	18.0575	17.70125	17.8225	17.44125	17.62
8/11/2019 12:43:30	-118.5145844	42.5437371	1236.549935	8/11/19	0.821875	0.530208333	8/11/19 12:43	12:44:28	21.57	20.97375	20.98375	20.72625	20.92875	20.525	20.605	20.525	20.25875	19.865	20.08625	20.28875	20.32125	19.97375	20.20625	19.86375	19.70125	19.655	19.58625	20.05375	19.835	19.745	19.45	19.6225	19.565	19.2075	19.2875	19.5475	19.55125	19.17375	19.28	18.7425	19.12375	19.06125	19.27	19.3425	19.3475	19.2375	18.94875	18.9325	18.91125
8/11/2019 12:43:31	-118.5145713	42.54373126	1236.4408	8/11/19	0.821886574	0.530219907	8/11/19 12:43	12:44:29	23.30375	23.0225	23.01625	22.73375	22.7275	22.3875	22.5575	22.5725	22.15	21.84875	22.125	22.33625	22.3525	21.875	22.17	21.795	21.585	21.6175	21.48	21.995	21.7225	21.6975	21.44375	21.555	21.45125	21.2225	21.18	21.355	21.3775	21.0775	21.04625	20.58	21.1575	21.11625	21.1	20.635	21.29125	20.9075	21.07125	20.70625	20.8375
8/11/2019 12:43:32	-118.5145578	42.54372534	1236.30171	8/11/19	0.821898148	0.530231481	8/11/19 12:43	12:44:30	23.495	22.97375	22.94375	22.84375	22.87625	22.4475	22.6275	22.58875	22.2125	21.9725	22.0125	22.36875	22.48375	21.97125	22.28125	21.80125	21.69375	21.7775	21.51125	22.11375	21.84375	21.82125	21.49125	21.64375	21.57125	21.2575	21.2625	21.53625	21.52375	21.1075	21.1525	20.77625	21.2125	21.33375	21.3275	21.02625	21.35125	21.0075	21.23	20.89375	21.0175
8/11/2019 12:43:33	-118.5145431	42.54371914	1236.123387	8/11/19	0.821909722	0.530243056	8/11/19 12:43	12:44:31	22.5225	22.31125	22.275	22.0275	22.06125	21.65125	21.885	21.8325	21.43125	21.155	21.375	21.58375	21.65875	21.1925	21.3725	21.125	20.91875	20.97125	20.76	21.2375	21.01625	20.995	20.825	20.855	20.72625	20.47625	20.575	20.665	20.735	20.46875	20.415	20.06875	20.6	20.66375	20.46625	20.28125	20.81375	20.2225	20.58125	20.10875	20.08875
8/11/2019 12:43:34	-118.5145277	42.54371304	1235.992161	8/11/19	0.821921296	0.53025463	8/11/19 12:43	12:44:32	22.325	21.9	21.8675	21.81125	21.93375	21.56875	21.545	21.54375	21.14375	20.94	21.08625	21.36125	21.4625	20.9525	21.1625	20.725	20.68375	20.74375	20.60625	21.04375	20.78375	20.745	20.455	20.61125	20.46	20.2475	20.2275	20.51125	20.47375	20.22125	20.0975	19.73	20.22	20.18125	20.415	19.88125	20.56375	20.0375	20.05875	19.97	19.92875
8/11/2019 12:43:35	-118.5145123	42.54370672	1235.962	8/11/19	0.82193287	0.530266204	8/11/19 12:43	12:44:33	22.2625	21.92125	21.6775	21.50375	21.5875	21.26375	21.32	21.22125	20.9375	20.54875	20.85875	21.00375	21.13375	20.675	20.94	20.5575	20.465	20.45125	20.3175	20.74375	20.54	20.4625	20.2875	20.395	20.27625	20.04	20.13875	20.24375	20.27625	19.9275	19.9425	19.49875	20.1	20.2125	20.30625	19.90875	20.405	19.86	20.0125	19.59375	19.8025
8/11/2019 12:43:36	-118.5144969	42.5437003	1235.964844	8/11/19	0.821944444	0.530277778	8/11/19 12:43	12:44:34	21.85	21.4875	21.3725	21.105	21.20375	20.86	21.03	20.88875	20.6525	20.33625	20.50125	20.69625	20.85625	20.38	20.55125	20.16	20.185	20.11625	19.935	20.42375	20.13375	20.20125	19.8725	20.0775	19.97875	19.5875	19.6775	19.865	19.92125	19.57625	19.58	19.17625	19.53125	19.745	19.75	19.3525	19.84125	19.47625	19.8175	19.5475	19.39375
8/11/2019 12:43:37	-118.5144809	42.54369376	1235.926467	8/11/19	0.821956019	0.530289352	8/11/19 12:43	12:44:35	21.51125	21.315	21.33375	21.16125	21.195	20.75	20.7875	20.75875	20.44	20.24125	20.36	20.4875	20.6925	20.23	20.47875	20.1875	19.90125	19.99625	19.88875	20.28	20.08125	20.02375	19.7325	19.87	19.92	19.54375	19.595	19.79375	19.79625	19.43625	19.4625	19.05375	19.47375	19.69875	19.70125	19.37	19.9575	19.29125	19.54	19.18625	19.28375
8/11/2019 12:43:38	-118.5144647	42.54368744	1235.939226	8/11/19	0.821967593	0.530300926	8/11/19 12:43	12:44:36	21.20666667	20.70555556	20.69222222	20.68111111	20.63777778	20.30444444	20.46	20.25777778	19.90444444	19.69	19.91555556	20.12444444	20.18444444	19.77222222	19.93333333	19.59333333	19.49444444	19.44	19.24888889	19.79	19.47333333	19.54111111	19.34333333	19.35111111	19.27111111	19.09333333	19.04555556	19.26333333	19.20222222	18.96111111	19.07666667	18.56777778	18.92444444	19.18444444	19.24333333	18.72333333	19.50555556	18.80333333	19.14	18.66888889	18.81555556
8/11/2019 12:43:39	-118.5144481	42.54368212	1235.9866	8/11/19	0.821979167	0.5303125	8/11/19 12:43	12:44:37	19.22285714	18.67428571	18.66	18.54285714	18.63285714	18.30142857	18.39	18.35571429	17.96714286	17.68571429	17.96285714	18.04428571	18.20857143	17.74142857	18.01571429	17.62285714	17.55571429	17.57142857	17.33857143	17.87857143	17.56	17.68142857	17.36142857	17.50142857	17.39285714	17.19	17.12428571	17.34428571	17.39714286	17.05142857	17.04285714	16.56428571	17.01142857	17.25714286	17.32	16.93428571	17.56571429	17.04714286	17.22571429	16.81	16.94285714
8/11/2019 12:43:40	-118.5144384	42.54367863	1235.944806	8/11/19	0.821990741	0.530324074	8/11/19 12:43	12:44:38	19.12888889	18.84111111	18.77777778	18.58333333	18.68777778	18.31	18.51111111	18.45111111	18.04666667	17.78	17.9	18.17333333	18.22333333	17.86777778	18.13888889	17.74666667	17.60111111	17.61888889	17.44333333	17.92888889	17.65	17.63111111	17.39222222	17.62333333	17.50222222	17.22555556	17.12777778	17.31444444	17.38777778	17.08555556	17.03111111	16.71333333	17.15	17.24777778	17.17888889	16.80333333	17.34555556	16.94111111	17.13666667	16.82	16.96888889
8/11/2019 12:43:41	-118.51444	42.54367072	1235.987097	8/11/19	0.822002315	0.530335648	8/11/19 12:43	12:44:39	19.49444444	19.12333333	19.02777778	18.89555556	18.97111111	18.58222222	18.74666667	18.54333333	18.31444444	18.00222222	18.13333333	18.42444444	18.49222222	18.18444444	18.33333333	17.88555556	17.87444444	17.82888889	17.65	18.15888889	17.92888889	17.93777778	17.68888889	17.81222222	17.62222222	17.41888889	17.50777778	17.65111111	17.63	17.37222222	17.36	16.87111111	17.50444444	17.56555556	17.65111111	17.34777778	17.81777778	17.27111111	17.27222222	16.98888889	17.16111111
8/11/2019 12:43:42	-118.5144489	42.54365491	1236.094839	8/11/19	0.822013889	0.530347222	8/11/19 12:43	12:44:40	18.37	17.765	18.06333333	17.71166667	17.84	17.66666667	17.72833333	17.70333333	17.185	17.025	17.18	17.455	17.595	17.04666667	17.33666667	17.00833333	16.785	16.90333333	16.68333333	17.18	16.94833333	16.90833333	16.62833333	16.83	16.77333333	16.50333333	16.48333333	16.60833333	16.58333333	16.31666667	16.365	15.98666667	16.32833333	16.645	16.55	16.035	16.83	16.44833333	16.39	16.385	16.09
8/11/2019 12:43:43	-118.5144598	42.54363842	1236.034387	8/11/19	0.822025463	0.530358796	8/11/19 12:43	12:44:41	20.90875	20.4225	20.4425	20.09625	20.2825	19.93625	20.05625	19.995	19.70875	19.42	19.6175	19.8725	19.855	19.44125	19.72625	19.3775	19.18625	19.2675	19.05125	19.555	19.34	19.28625	19.03	19.1	19.06125	18.71875	18.7725	18.93375	19.01375	18.66375	18.5575	18.2575	18.75125	18.75875	18.98625	18.3825	18.905	18.6775	18.6325	18.28	18.33125
8/11/2019 12:43:44	-118.5144695	42.54362372	1235.9088	8/11/19	0.822037037	0.53037037	8/11/19 12:43	12:44:42	21.81333333	21.41222222	21.36111111	21.29111111	21.39	21.01777778	21.13666667	21.1	20.68888889	20.44111111	20.58	20.78666667	20.88555556	20.45777778	20.72333333	20.32	20.14555556	20.24888889	20.09888889	20.61333333	20.27888889	20.22222222	19.95444444	20.15444444	20.07666667	19.80888889	19.78777778	19.99	19.96888889	19.76	19.7	19.22555556	19.74888889	19.70888889	19.68777778	19.25222222	19.96111111	19.43444444	19.72888889	19.49666667	19.33666667
8/11/2019 12:43:45	-118.5144768	42.54361491	1235.804161	8/11/19	0.822048611	0.530381944	8/11/19 12:43	12:44:43	22.94142857	22.38857143	22.32285714	22.34	22.19428571	22.03857143	22.07714286	22.06	21.69714286	21.39571429	21.60142857	21.76714286	21.9	21.51428571	21.72142857	21.42857143	21.19428571	21.19285714	21.08142857	21.53285714	21.24285714	21.31857143	21.06285714	21.16285714	20.99857143	20.77714286	20.76428571	20.96	21	20.70714286	20.63428571	20.33285714	20.81285714	20.84285714	20.81428571	20.42571429	21.05	20.53	20.66714286	20.40857143	20.38571429
8/11/2019 12:43:46	-118.5144831	42.54361388	1235.689548	8/11/19	0.822060185	0.530393519	8/11/19 12:43	12:44:44	21.88	21.26125	21.42375	21.28625	21.17625	20.93625	21.05375	20.885	20.56	20.325	20.575	20.715	20.7475	20.44625	20.5025	20.27375	20.08875	20.09625	19.89375	20.46625	20.19	20.16625	19.93375	20.07375	19.89125	19.6225	19.61	19.9075	19.93625	19.62	19.515	19.205	19.6675	19.675	19.60125	19.35875	19.77125	19.3525	19.4275	19.36625	19.1875
8/11/2019 12:43:47	-118.5144925	42.54361469	1235.617548	8/11/19	0.822071759	0.530405093	8/11/19 12:43	12:44:45	23.17555556	22.84222222	22.87888889	22.79	22.80888889	22.35555556	22.46666667	22.32666667	22.03888889	21.78444444	21.97111111	22.21444444	22.36111111	21.82777778	22.02111111	21.78666667	21.59111111	21.57555556	21.43	21.91222222	21.63777778	21.62333333	21.37777778	21.52555556	21.37777778	21.15333333	21.10888889	21.31333333	21.29222222	21.02333333	21.04111111	20.64888889	21.00333333	20.95666667	21.15111111	20.69111111	21.15333333	20.77333333	20.86111111	20.59555556	20.60555556
8/11/2019 12:43:48	-118.514504	42.543617	1235.5184	8/11/19	0.822083333	0.530416667	8/11/19 12:43	12:44:46	23.92125	23.2575	23.38	23.14	23.24625	22.91625	22.89875	22.9625	22.72	22.23625	22.4025	22.71875	22.80625	22.2975	22.4175	22.1975	22.0575	22.105	21.88	22.28625	22.085	22.0675	21.7925	21.8825	21.8725	21.475	21.575	21.7925	21.75	21.355	21.3625	21.02	21.29625	21.55875	21.58125	20.8575	21.715	21.1775	21.335	20.995	21.10125
8/11/2019 12:43:49	-118.5145149	42.54362037	1235.405581	8/11/19	0.822094907	0.530428241	8/11/19 12:43	12:44:47	23.30625	23.1225	23.1775	22.9125	22.86625	22.54125	22.62625	22.535	22.32625	21.9	22.08875	22.28	22.37125	22.00375	22.23875	21.925	21.79	21.67375	21.59875	22.095	21.77	21.82375	21.5525	21.59375	21.54375	21.275	21.28	21.47	21.38125	21.1325	21.01625	20.73625	21.17125	21.23375	21.365	20.8025	21.43	20.92125	21.02	20.8425	20.78375
8/11/2019 12:43:50	-118.5145279	42.54362415	1235.372419	8/11/19	0.822106481	0.530439815	8/11/19 12:43	12:44:48	23.00222222	22.70888889	22.81555556	22.66666667	22.67111111	22.26888889	22.39333333	22.27777778	21.99111111	21.64333333	21.82777778	22.10777778	22.24333333	21.67666667	22	21.62	21.48888889	21.53111111	21.29	21.76444444	21.52666667	21.44111111	21.27555556	21.36777778	21.21777778	20.91	21.03333333	21.14222222	21.13777778	20.83666667	20.9	20.43333333	20.91555556	20.80555556	21.21111111	20.52555556	21.10666667	20.65666667	20.82222222	20.41333333	20.53
8/11/2019 12:43:51	-118.5145413	42.54362851	1235.308742	8/11/19	0.822118056	0.530451389	8/11/19 12:43	12:44:49	22.44625	22.04375	22.06	21.87125	21.92	21.5875	21.62875	21.5475	21.2775	20.85125	21.11375	21.29875	21.3825	20.9775	21.155	20.83875	20.6975	20.65875	20.49375	21.01	20.75125	20.69625	20.53125	20.57875	20.465	20.25875	20.21	20.38875	20.32625	20.12	20.10625	19.64625	20.06	20.22125	20.21875	20.19625	20.63625	20.20875	20.04375	20	19.92375
8/11/2019 12:43:52	-118.5145545	42.54363369	1235.239258	8/11/19	0.82212963	0.530462963	8/11/19 12:43	12:44:50	21.64857143	21.13571429	21.11857143	20.95714286	20.96714286	20.62	20.70571429	20.7	20.42285714	19.96285714	20.14	20.32142857	20.6	20.02714286	20.30285714	19.91428571	19.80142857	19.78714286	19.67714286	20.13714286	19.85285714	19.79428571	19.52142857	19.73857143	19.57142857	19.38857143	19.30714286	19.54142857	19.48857143	19.29714286	19.30142857	18.79285714	19.23428571	19.50571429	19.76285714	19	19.68714286	19.08571429	19.54857143	19.03714286	19.09142857
8/11/2019 12:43:53	-118.5145673	42.54363946	1235.2096	8/11/19	0.822141204	0.530474537	8/11/19 12:43	12:44:51	21.28	21.1175	21.04	20.77375	20.83875	20.37	20.53875	20.41625	20.1775	19.8825	20.09125	20.2725	20.39625	19.92125	20.19125	19.83375	19.75125	19.5975	19.5675	19.96875	19.71875	19.85	19.43875	19.62125	19.55	19.295	19.20375	19.46375	19.37375	19.11375	19.21375	18.76375	19.25375	19.3875	19.59125	19.1725	19.53125	19.1	19.2475	18.89375	18.94
8/11/2019 12:43:54	-118.5145803	42.5436456	1235.285	8/11/19	0.822152778	0.530486111	8/11/19 12:43	12:44:52	20.88125	20.3425	20.5075	20.25625	20.24375	19.96375	20.00625	19.93	19.6275	19.1975	19.3875	19.67125	19.6075	19.29375	19.4975	19.10875	19.09	19.01375	18.87	19.25375	19.13375	19.0475	18.82125	19.01875	18.90375	18.59125	18.59375	18.78125	18.77375	18.46625	18.45625	18.20875	18.55375	18.5225	18.635	18.55875	18.79875	18.66375	18.505	18.2775	18.37375
8/11/2019 12:43:55	-118.5145937	42.54365103	1235.37852	8/11/19	0.822164352	0.530497685	8/11/19 12:43	12:44:53	20.7725	20.2075	20.17625	20.03125	19.94875	19.6075	19.76875	19.65375	19.3	18.9375	19.24	19.46	19.455	19.0475	19.245	18.9925	18.7875	18.81625	18.74375	19.06125	18.8375	18.8275	18.635	18.645	18.6275	18.3775	18.34375	18.495	18.6025	18.28375	18.37875	17.94625	18.335	18.60375	18.525	17.82375	18.94875	18.08875	18.55	18.235	18.16875
8/11/2019 12:43:56	-118.5146102	42.54365718	1235.399811	8/11/19	0.822175926	0.530509259	8/11/19 12:43	12:44:54	21.61714286	21.23285714	21.09571429	21.18285714	21.13714286	20.79857143	20.87428571	20.79428571	20.47714286	20.13428571	20.36142857	20.59857143	20.54428571	20.24571429	20.37142857	19.97571429	19.88	19.93285714	19.70142857	20.20142857	19.92857143	19.92428571	19.64142857	19.81142857	19.81142857	19.39571429	19.45142857	19.80142857	19.57	19.21285714	19.45571429	18.97428571	19.30714286	19.53285714	19.43428571	19.19857143	20.1	19.38428571	19.38571429	19.36857143	18.91857143
8/11/2019 12:43:57	-118.5146293	42.54366422	1235.293387	8/11/19	0.8221875	0.530520833	8/11/19 12:43	12:44:55	22.05333333	21.68444444	21.60222222	21.34555556	21.51222222	21.14777778	21.35222222	21.20777778	20.81555556	20.56111111	20.77222222	20.98	21.07666667	20.62333333	20.75333333	20.50111111	20.37333333	20.35444444	20.19444444	20.62222222	20.39222222	20.39444444	20.14222222	20.31222222	20.10555556	19.80888889	19.93222222	20.08222222	20.10444444	19.73777778	19.76222222	19.36111111	19.77555556	19.97555556	20.02666667	19.72444444	20.13333333	19.67	19.80777778	19.48444444	19.44333333
8/11/2019 12:43:58	-118.514647	42.5436707	1235.241935	8/11/19	0.822199074	0.530532407	8/11/19 12:43	12:44:56	21.59	21.14625	20.95125	21.03375	21.075	20.69375	20.86	20.79	20.4625	20.12375	20.23625	20.45375	20.5925	20.16625	20.3525	20.0325	19.8675	19.88375	19.7225	20.11875	19.85875	19.73875	19.57875	19.69125	19.605	19.32125	19.40875	19.4825	19.525	19.4225	19.285	18.925	19.21625	19.49625	19.73875	19.3225	19.69125	19.1475	19.3075	18.93375	19.01875
8/11/2019 12:43:59	-118.5146662	42.54367694	1235.2752	8/11/19	0.822210648	0.530543981	8/11/19 12:43	12:44:57	23.26375	22.77375	23.04875	22.86125	22.915	22.52375	22.59875	22.565	22.18625	21.915	22.1375	22.2675	22.3825	21.965	22.105	21.80375	21.60875	21.67	21.4775	21.935	21.6175	21.67125	21.3875	21.55375	21.4275	21.1325	21.08	21.39125	21.31625	21.0025	21.04375	20.68	21.015	21.46625	21.2575	21.19375	21.56375	20.84125	21.0475	20.74125	20.88
8/11/2019 12:44:00	-118.5146853	42.54368342	1235.22571	8/11/19	0.822222222	0.530555556	8/11/19 12:44	12:44:58	25.49625	25.235	25.03875	25.08375	25.03625	24.68625	24.6625	24.61125	24.30625	23.9975	24.17	24.405	24.40375	24.01125	24.32	23.8825	23.7575	23.785	23.59875	23.9875	23.77625	23.71375	23.58	23.51625	23.505	23.27375	23.27125	23.4725	23.3825	23.13125	23.18	22.7075	23.2875	23.22375	23.49125	22.9425	23.56875	23.15125	23.18	22.9425	22.97125
8/11/2019 12:44:01	-118.5147039	42.54369002	1235.142806	8/11/19	0.822233796	0.53056713	8/11/19 12:44	12:44:59	26.1075	25.70375	25.65	25.51125	25.4575	24.99375	25.1625	25.035	24.705	24.50875	24.64375	24.88	24.85	24.5175	24.72125	24.29125	24.24375	24.075	23.985	24.50375	24.19625	24.2175	23.86875	24.055	23.8975	23.7275	23.63	23.855	23.76625	23.52875	23.57375	23.16125	23.70625	23.64625	23.775	23.4825	23.90375	23.3525	23.6525	23.285	23.25875
8/11/2019 12:44:02	-118.5147214	42.54369668	1235.07371	8/11/19	0.82224537	0.530578704	8/11/19 12:44	12:45:00	26.34125	25.78875	25.7625	25.7225	25.62125	25.2525	25.33	25.215	24.87875	24.5475	24.7875	24.875	25.05125	24.6375	24.82625	24.53125	24.365	24.3475	24.195	24.57625	24.36125	24.2975	24.08125	24.19375	24.10375	23.86875	23.81125	23.9775	23.9075	23.77125	23.62375	23.3425	23.68625	23.785	23.99125	23.26625	24.01125	23.475	23.6075	23.32625	23.31875
8/11/2019 12:44:03	-118.514738	42.5437029	1235.0166	8/11/19	0.822256944	0.530590278	8/11/19 12:44	12:45:01	25.95875	25.27125	25.28	25.21125	25.18375	24.9825	24.95375	24.84875	24.55	24.29375	24.415	24.55875	24.6825	24.25375	24.48375	24.1425	24.0275	23.94625	23.76125	24.15875	24.0225	23.99625	23.7325	23.81	23.7	23.43125	23.47	23.555	23.5725	23.22125	23.36	22.90875	23.14625	23.41	23.5	23.21125	23.78	23.16625	23.135	22.97375	22.945
8/11/2019 12:44:04	-118.5147548	42.54370925	1234.997742	8/11/19	0.822268519	0.530601852	8/11/19 12:44	12:45:02	25.415	24.885	24.93375	24.60125	24.63125	24.305	24.4675	24.31875	23.93625	23.67375	23.85125	24.1025	24.14	23.67375	23.91875	23.54125	23.4075	23.4425	23.2775	23.6875	23.45375	23.4075	23.15	23.19125	23.15625	22.9875	22.90125	23.06625	23.04625	22.71875	22.77375	22.46875	22.76375	22.6875	23.01125	22.53125	23.34875	22.5775	22.9775	22.435	22.62125
8/11/2019 12:44:05	-118.5147721	42.54371648	1235.052161	8/11/19	0.822280093	0.530613426	8/11/19 12:44	12:45:03	23.58888889	23.30444444	23.16333333	23.03555556	23.00888889	22.71888889	22.71666667	22.66888889	22.38111111	22.03888889	22.23111111	22.31222222	22.48666667	22.14444444	22.29444444	21.85555556	21.77222222	21.79888889	21.68666667	22.07444444	21.80555556	21.76111111	21.51666667	21.60111111	21.56333333	21.21444444	21.33555556	21.45888889	21.39777778	21.11	21.22111111	20.78	21.10777778	21.09555556	21.39333333	20.91555556	21.52222222	21.00777778	21.30111111	20.88333333	20.92
8/11/2019 12:44:06	-118.5147901	42.54372407	1235.219065	8/11/19	0.822291667	0.530625	8/11/19 12:44	12:45:04	21.71571429	21.22428571	21.24285714	21.22714286	21.19714286	20.77571429	20.83571429	20.75	20.53714286	20.08428571	20.30714286	20.49142857	20.56285714	20.30714286	20.44428571	20.10285714	19.96571429	19.94142857	19.83285714	20.23714286	19.91571429	19.94142857	19.60714286	19.88	19.65857143	19.47428571	19.37571429	19.65428571	19.66428571	19.42714286	19.3	18.97428571	19.39	19.62142857	19.53857143	19.30857143	19.60428571	19.42142857	19.44571429	19.19428571	18.96
8/11/2019 12:44:07	-118.5148091	42.5437309	1235.373097	8/11/19	0.822303241	0.530636574	8/11/19 12:44	12:45:05	20.31125	19.655	19.785	19.61375	19.6525	19.19875	19.29625	19.27875	18.93375	18.58125	18.68375	18.9375	19.055	18.575	18.83625	18.5475	18.35625	18.38	18.2675	18.73375	18.34375	18.41625	18.1625	18.32625	18.18375	17.92	17.96875	18.24625	18.17	17.90125	17.92	17.54375	17.92125	18.14375	18.12375	17.72	18.33	17.8725	17.9875	17.74625	17.82375
8/11/2019 12:44:08	-118.5148286	42.54373816	1235.4466	8/11/19	0.822314815	0.530648148	8/11/19 12:44	12:45:06	18.71875	18.29375	18.19375	18.02375	18.19875	17.8625	17.87	17.82	17.66375	17.21125	17.43	17.60125	17.6125	17.22625	17.575	17.175	17.0575	17.12875	16.98875	17.305	17.1775	17.145	16.83	17.02	16.91625	16.7175	16.75875	16.87125	16.8525	16.60625	16.625	16.15375	16.4725	16.82125	16.79	16.09375	17.17375	16.5125	16.80875	16.38	16.31875
8/11/2019 12:44:09	-118.5148447	42.54374332	1235.429677	8/11/19	0.822326389	0.530659722	8/11/19 12:44	12:45:07	18.02857143	17.56	17.49428571	17.42857143	17.51285714	17.11714286	17.07571429	17.06428571	16.85571429	16.54571429	16.79285714	16.89142857	17.02142857	16.56	16.82285714	16.53571429	16.27428571	16.35714286	16.21571429	16.68571429	16.45714286	16.37571429	16.21857143	16.39571429	16.17714286	15.94285714	15.96714286	16.24714286	16.17428571	15.91428571	15.87714286	15.49571429	15.77714286	16.01857143	16.05285714	15.96571429	16.7	15.77857143	16.14285714	15.59142857	15.64857143
8/11/2019 12:44:10	-118.514853	42.54373926	1235.356484	8/11/19	0.822337963	0.530671296	8/11/19 12:44	12:45:08	17.9775	17.54875	17.7	17.27875	17.54625	17.14375	17.21	17.19625	16.87625	16.6925	16.7025	16.9225	16.9675	16.645	16.84625	16.55375	16.4	16.38375	16.36375	16.73875	16.42875	16.54125	16.15125	16.41875	16.22375	15.9975	15.94	16.1025	16.13125	15.95875	15.97125	15.6275	15.945	16.32875	16.44875	15.61	16.19125	15.82	16.05625	15.63125	15.69375
8/11/2019 12:44:11	-118.5148622	42.5437286	1235.337387	8/11/19	0.822349537	0.53068287	8/11/19 12:44	12:45:09	18.275	17.7975	17.68625	17.755	17.56625	17.33875	17.375	17.34375	17.085	16.74875	16.8875	17.1	17.14625	16.80125	16.94875	16.59625	16.5025	16.48625	16.35875	16.74625	16.57125	16.56875	16.3075	16.45625	16.25	16.14625	16.09125	16.235	16.24375	16.0425	16.0125	15.54875	15.93	16.15875	16.2725	15.7575	16.3175	15.87375	16.25125	15.82875	15.7275
8/11/2019 12:44:12	-118.5148712	42.54371523	1235.285355	8/11/19	0.822361111	0.530694444	8/11/19 12:44	12:45:10	18.22375	17.845	17.95625	17.72875	17.82	17.32875	17.42	17.31375	17.1625	16.75375	17.015	17.11	17.245	16.7675	17.07125	16.675	16.5975	16.5775	16.38	16.815	16.565	16.5975	16.35625	16.42875	16.31	16.01125	15.9825	16.25875	16.345	16.02875	16.0675	15.66625	15.99625	16.4225	16.7025	15.9175	16.53625	16.15625	16.3525	15.9525	15.86125
8/11/2019 12:44:13	-118.51488	42.54370226	1235.2032	8/11/19	0.822372685	0.530706019	8/11/19 12:44	12:45:11	19.52	18.91	19.00857143	18.90714286	18.83	18.55714286	18.63	18.58857143	18.30714286	17.96	18.23857143	18.29714286	18.33571429	18.05428571	18.23714286	17.97571429	17.67571429	17.65285714	17.50428571	17.96857143	17.79428571	17.70857143	17.43571429	17.59285714	17.37571429	17.23	17.25285714	17.4	17.43857143	17.11285714	17.05571429	16.65571429	17.03571429	17.46142857	17.65714286	17.08285714	17.65857143	17.06285714	17.29428571	17.05857143	16.83428571
8/11/2019 12:44:14	-118.5148839	42.54369359	1235.103097	8/11/19	0.822384259	0.530717593	8/11/19 12:44	12:45:12	19.15555556	18.61333333	18.63555556	18.66555556	18.42444444	18.26777778	18.28444444	18.15333333	17.86777778	17.53222222	17.70111111	17.82666667	17.96	17.56222222	17.71111111	17.47555556	17.23111111	17.23444444	17.07777778	17.43555556	17.21333333	17.22555556	16.89222222	17.09111111	16.99333333	16.73444444	16.77444444	16.95333333	16.92222222	16.68222222	16.56888889	16.24666667	16.61666667	16.93444444	16.86444444	16.34	17.06444444	16.75555556	16.92	16.57444444	16.47
8/11/2019 12:44:15	-118.5148795	42.54368674	1234.938677	8/11/19	0.822395833	0.530729167	8/11/19 12:44	12:45:13	19.5925	19.37625	19.30625	19.1675	19.15625	18.86	18.79	18.825	18.52375	18.22625	18.3925	18.44625	18.6	18.11125	18.39	18.04875	17.91875	17.91625	17.8475	18.1	17.9425	17.9375	17.62125	17.7675	17.6675	17.40375	17.455	17.63625	17.56	17.37625	17.37875	16.975	17.30625	17.785	17.605	17.21875	17.6675	17.22625	17.47	17.1425	17.07125
8/11/2019 12:44:16	-118.5148697	42.54367971	1234.807806	8/11/19	0.822407407	0.530740741	8/11/19 12:44	12:45:14	21.31	20.93285714	20.90571429	20.64857143	20.79285714	20.26	20.53714286	20.31714286	20.19571429	19.87285714	19.9	20.12714286	20.16571429	19.78428571	19.95714286	19.66	19.47571429	19.45428571	19.29714286	19.77714286	19.52142857	19.51571429	19.17142857	19.19428571	19.22714286	18.96	18.94142857	19.12571429	19.04857143	18.88	18.79714286	18.54714286	18.60142857	18.85714286	18.78714286	18.80571429	19.17285714	18.78857143	18.94	18.87714286	18.47714286
8/11/2019 12:44:17	-118.5148568	42.54367259	1234.711194	8/11/19	0.822418981	0.530752315	8/11/19 12:44	12:45:15	22.85375	22.46875	22.60125	22.31	22.4875	22.08875	22.07	22.085	21.755	21.33625	21.65	21.74875	21.845	21.29	21.57125	21.27625	21.04	21	21.01	21.31625	21.14875	21.07125	20.8375	20.95625	20.81625	20.6525	20.6775	20.66125	20.7325	20.51625	20.435	20.13375	20.39	20.6425	20.81625	20.55	21.00625	20.26	20.435	20.255	20.1675
8/11/2019 12:44:18	-118.5148415	42.54366584	1234.645	8/11/19	0.822430556	0.530763889	8/11/19 12:44	12:45:16	24.67555556	24.44	24.10444444	24.22777778	24.04	23.67111111	23.80333333	23.65555556	23.4	23.10222222	23.27666667	23.45555556	23.54222222	23.07777778	23.23666667	23.01111111	22.81222222	22.71222222	22.72111111	23.02111111	22.76777778	22.77111111	22.52666667	22.59222222	22.54	22.29666667	22.36888889	22.45888889	22.36111111	22.18888889	22.16444444	21.70888889	22.14444444	22.22111111	22.37111111	21.92333333	22.58555556	21.98777778	22.04333333	21.64111111	21.83666667
8/11/2019 12:44:19	-118.5148249	42.54365952	1234.6504	8/11/19	0.82244213	0.530775463	8/11/19 12:44	12:45:17	26.16625	25.53375	25.77375	25.60125	25.45875	25.08125	25.25625	25.05125	24.7575	24.47375	24.72375	24.7675	24.875	24.485	24.7475	24.295	24.1675	24.13375	24.0225	24.4375	24.2575	24.2025	23.98125	24.02625	23.85625	23.5925	23.62375	23.79125	23.76625	23.53625	23.52625	23.14	23.38625	23.52875	23.805	23.24125	23.835	23.39125	23.51	23.32125	23.1875
8/11/2019 12:44:20	-118.5148072	42.54365324	1234.677968	8/11/19	0.822453704	0.530787037	8/11/19 12:44	12:45:18	26.55571429	26.21571429	25.98714286	26.13571429	26.00142857	25.64142857	25.77571429	25.68714286	25.31285714	25.11857143	25.22428571	25.28285714	25.39428571	25.05285714	25.20285714	24.80571429	24.73142857	24.68428571	24.63285714	24.99428571	24.73	24.74857143	24.42571429	24.59142857	24.33	24.19571429	24.28	24.34714286	24.30428571	24.14	24.06714286	23.85857143	24.02428571	24.22142857	24.18142857	23.79571429	24.45142857	23.97857143	23.88714286	23.77142857	23.61428571
8/11/2019 12:44:21	-118.5147893	42.54364696	1234.649452	8/11/19	0.822465278	0.530798611	8/11/19 12:44	12:45:19	26.10555556	25.73666667	25.73	25.61777778	25.46777778	25.15111111	25.28111111	25.24111111	24.95666667	24.43222222	24.70666667	24.84	24.95666667	24.57555556	24.77777778	24.38777778	24.25	24.23666667	24.16111111	24.48777778	24.26777778	24.23111111	23.95888889	24.08888889	23.95666667	23.74222222	23.69444444	23.93555556	23.9	23.63444444	23.61	23.29333333	23.48222222	23.77888889	24.07444444	23.56333333	23.90111111	23.44777778	23.71	23.35222222	23.22
8/11/2019 12:44:22	-118.5147713	42.54364106	1234.610548	8/11/19	0.822476852	0.530810185	8/11/19 12:44	12:45:20	24.60375	24.3725	24.17375	24.205	24.1575	23.69875	23.78125	23.76125	23.4425	23.0275	23.32875	23.45125	23.45875	23.085	23.3475	23.00875	22.8775	22.7875	22.7275	23.115	22.91375	22.7625	22.6225	22.70375	22.5375	22.42125	22.41	22.49625	22.5675	22.23375	22.3675	21.94375	22.2625	22.4325	22.74625	22.2175	22.59875	22.24625	22.415	22.16625	21.91125
8/11/2019 12:44:23	-118.5147538	42.54363556	1234.5538	8/11/19	0.822488426	0.530821759	8/11/19 12:44	12:45:21	23.46714286	23.11714286	23.23	22.90428571	22.88428571	22.52428571	22.56428571	22.47428571	22.11142857	21.85	22.15	22.25571429	22.29714286	21.98857143	22.05714286	21.71428571	21.69142857	21.73428571	21.45	21.95285714	21.68285714	21.67285714	21.40714286	21.53857143	21.46571429	21.18571429	21.24428571	21.37428571	21.41	21.08571429	21.23857143	20.64571429	21.05142857	21.53571429	21.60714286	21.19	21.82714286	21.09571429	21.37571429	20.97142857	20.95
8/11/2019 12:44:24	-118.514736	42.54363076	1234.528677	8/11/19	0.8225	0.530833333	8/11/19 12:44	12:45:22	25.80428571	25.44428571	25.31	25.40714286	25.21714286	24.85714286	24.71428571	24.81	24.47571429	24.17	24.29	24.43142857	24.48	24.05571429	24.33857143	24	23.97	23.75571429	23.71142857	24.05714286	23.92285714	23.85285714	23.59571429	23.66857143	23.58142857	23.43714286	23.40857143	23.53	23.50428571	23.24285714	23.37428571	22.97	23.22428571	23.43857143	23.68857143	23.44571429	23.94571429	23.36857143	23.32142857	23.01714286	23.02142857
8/11/2019 12:44:25	-118.5147185	42.54362573	1234.586032	8/11/19	0.822511574	0.530844907	8/11/19 12:44	12:45:23	27.58555556	27.00222222	27.11111111	26.99333333	26.91888889	26.54555556	26.66444444	26.59666667	26.28111111	25.86111111	26.17222222	26.25666667	26.42888889	26.01777778	26.19666667	25.80888889	25.69222222	25.68444444	25.53777778	25.86666667	25.72444444	25.65333333	25.43111111	25.43111111	25.4	25.19666667	25.09333333	25.28222222	25.37666667	25.06	25.07222222	24.63777778	24.97555556	25.35555556	25.38444444	25.11111111	25.27333333	24.86111111	24.92777778	24.73555556	24.71666667
8/11/2019 12:44:26	-118.5147012	42.54362066	1234.617968	8/11/19	0.822523148	0.530856481	8/11/19 12:44	12:45:24	27.3375	27.19	26.97125	26.9075	26.83375	26.5025	26.47375	26.34625	26.19375	25.82	26.01125	26.14875	26.1675	25.8425	26.09625	25.60125	25.605	25.42625	25.42125	25.7875	25.57375	25.51625	25.28875	25.3975	25.24	25.08375	24.97875	25.19625	25.1425	24.97625	24.90125	24.6025	24.8975	25.21	25.17625	24.72875	25.14125	24.8025	24.64375	24.8025	24.57125
8/11/2019 12:44:27	-118.5146842	42.54361576	1234.6304	8/11/19	0.822534722	0.530868056	8/11/19 12:44	12:45:25	27.265	27.26125	27.04875	26.9675	26.955	26.535	26.6275	26.53125	26.19875	25.78375	26.04875	26.2	26.335	25.8175	26.15125	25.735	25.60625	25.6275	25.54125	25.9725	25.67375	25.7125	25.36375	25.37625	25.295	25.09125	25.04	25.23625	25.22625	24.91125	24.97875	24.6225	24.8125	25.26625	25.225	24.86	24.98125	24.735	24.63	24.66	24.755
8/11/2019 12:44:28	-118.5146674	42.54361075	1234.649645	8/11/19	0.822546296	0.53087963	8/11/19 12:44	12:45:26	25.26	25.2	24.84555556	24.76222222	24.80777778	24.39222222	24.50333333	24.31666667	24.09666667	23.75666667	24.01555556	24.21444444	24.18888889	23.81222222	24.02111111	23.63666667	23.55222222	23.57555556	23.44555556	23.75666667	23.53666667	23.51555556	23.35333333	23.42	23.37	23.14666667	23.03222222	23.25	23.23	23.14888889	22.99555556	22.67	23.04888889	23.30222222	23.25222222	22.69333333	23.25777778	22.79666667	22.85666667	22.74111111	22.64666667
8/11/2019 12:44:29	-118.5146518	42.5436056	1234.575226	8/11/19	0.82255787	0.530891204	8/11/19 12:44	12:45:27	23.64555556	23.25444444	23.25666667	23.24888889	23.22888889	22.86111111	22.84888889	22.68222222	22.52555556	22.18111111	22.42222222	22.48888889	22.53333333	22.20555556	22.40888889	22.07555556	21.99111111	21.94222222	21.77444444	22.17333333	21.94777778	21.90666667	21.75444444	21.71555556	21.71	21.42777778	21.43333333	21.61888889	21.7	21.37888889	21.38444444	20.97222222	21.43666667	21.69555556	21.63888889	21.27777778	21.79111111	21.03111111	21.71	21.09777778	21.07111111
8/11/2019 12:44:30	-118.5146369	42.54360079	1234.485258	8/11/19	0.822569444	0.530902778	8/11/19 12:44	12:45:28	23.58125	23.3075	23.18375	23.06125	23.20875	22.80125	22.6975	22.7875	22.55	22.1475	22.37875	22.45	22.61625	22.17125	22.265	22.04	21.875	21.8475	21.74875	22.11125	21.9325	21.8775	21.59125	21.70625	21.68375	21.4375	21.3125	21.54125	21.5775	21.44375	21.285	20.93375	21.38875	21.71625	21.60875	21.315	21.8825	21.23625	21.4225	21.13375	21.145
8/11/2019 12:44:31	-118.5146224	42.54359571	1234.390129	8/11/19	0.822581019	0.530914352	8/11/19 12:44	12:45:29	25.42777778	25.07111111	24.97777778	24.87555556	24.93333333	24.60888889	24.59666667	24.42777778	24.28222222	23.91444444	24.14111111	24.18888889	24.34222222	23.98222222	24.06555556	23.78444444	23.65111111	23.48111111	23.50444444	23.87555556	23.61777778	23.60222222	23.35111111	23.50777778	23.39444444	23.12222222	23.13777778	23.23444444	23.26888889	23.05222222	23.14333333	22.7	22.97444444	23.3	23.21444444	23.04777778	23.13222222	22.84333333	23.03	22.88777778	22.80111111
8/11/2019 12:44:32	-118.514608	42.5435905	1234.345	8/11/19	0.822592593	0.530925926	8/11/19 12:44	12:45:30	26.55666667	26.15888889	26.04222222	26.05777778	26.06222222	25.72444444	25.68111111	25.66555556	25.38	25.05444444	25.17222222	25.33777778	25.42555556	25.03777778	25.28	24.90333333	24.77333333	24.62666667	24.62333333	24.97444444	24.74666667	24.69222222	24.51111111	24.64666667	24.57888889	24.23555556	24.32888889	24.40444444	24.35777778	24.13777778	24.15444444	23.76333333	24.09444444	24.13222222	24.26	24.10111111	24.49888889	23.94666667	23.87	23.66888889	23.83
8/11/2019 12:44:33	-118.5145919	42.54358517	1234.280581	8/11/19	0.822604167	0.5309375	8/11/19 12:44	12:45:31	26.92625	26.6775	26.68	26.485	26.47	26.33375	26.23125	26.11125	25.90125	25.41875	25.66	25.87125	25.93625	25.47375	25.70125	25.41625	25.36375	25.2475	25.22625	25.515	25.2875	25.2675	24.94125	24.99875	25.105	24.745	24.7275	24.9275	24.91375	24.65625	24.62	24.2625	24.55125	24.59	24.81375	24.54375	24.91125	24.2	24.56	24.1275	24.04875
8/11/2019 12:44:34	-118.5145744	42.54357982	1234.234355	8/11/19	0.822615741	0.530949074	8/11/19 12:44	12:45:32	25.76875	25.6475	25.41625	25.3125	25.3425	24.99125	24.9925	25.03625	24.705	24.31125	24.53	24.76	24.80125	24.43875	24.65125	24.25875	24.1125	24.0825	24.08125	24.355	24.25375	24.1425	23.86375	24.0125	23.815	23.62	23.68125	23.7275	23.79625	23.5675	23.6025	23.17875	23.34	23.60625	23.6775	23.53	23.67375	23.2775	23.5025	23.30625	23.16875
8/11/2019 12:44:35	-118.5145575	42.54357396	1234.183387	8/11/19	0.822627315	0.530960648	8/11/19 12:44	12:45:33	22.36111111	22.25333333	22.08777778	22.21222222	22.03	21.65222222	21.79666667	21.66888889	21.49555556	21.17888889	21.37111111	21.44222222	21.58333333	21.17888889	21.44111111	21.10333333	20.93	21.00111111	20.82555556	21.23111111	21.04888889	20.96333333	20.73777778	20.77222222	20.68444444	20.40444444	20.51222222	20.63333333	20.67333333	20.42333333	20.49555556	20.03555556	20.53555556	20.72888889	20.74111111	20.19555556	20.83111111	20.16333333	20.63222222	20.13555556	19.92888889
8/11/2019 12:44:36	-118.5145406	42.54356829	1234.170484	8/11/19	0.822638889	0.530972222	8/11/19 12:44	12:45:34	19.02333333	18.82888889	18.58555556	18.62333333	18.57	18.25	18.20111111	18.23666667	17.91888889	17.60777778	17.84	17.91555556	18.07111111	17.58666667	17.83222222	17.50777778	17.51111111	17.32777778	17.28222222	17.69444444	17.42555556	17.34888889	17.08	17.21666667	17.13222222	16.94333333	16.98777778	17.10444444	17.05666667	16.96444444	17.00888889	16.68111111	16.80888889	17.26111111	17.37111111	17.14333333	17.33111111	16.86555556	17.26666667	16.96333333	16.72888889
8/11/2019 12:44:37	-118.5145241	42.54356276	1234.1504	8/11/19	0.822650463	0.530983796	8/11/19 12:44	12:45:35	19.345	19.21125	19.225	18.92	19.0425	18.69	18.575	18.63125	18.285	17.9825	18.1475	18.3075	18.4525	18.02375	18.26875	17.99375	17.7925	17.81375	17.6875	18.075	17.85125	17.76125	17.5725	17.6725	17.55	17.3625	17.40875	17.49	17.49125	17.345	17.32625	17.09625	17.22375	17.56125	17.985	17.18125	17.8875	17.29625	17.4325	17.165	17.12625
8/11/2019 12:44:38	-118.5145071	42.54355737	1234.099581	8/11/19	0.822662037	0.53099537	8/11/19 12:44	12:45:36	20.29875	20.14375	20.08	19.95125	19.97375	19.5475	19.6075	19.515	19.3	18.88375	19.14875	19.29875	19.38125	18.94375	19.125	18.885	18.79875	18.855	18.6975	18.9775	18.8575	18.8025	18.5325	18.7175	18.5725	18.295	18.29375	18.5275	18.51375	18.32	18.33875	17.96	18.13	18.4775	18.4075	18.2325	18.56875	18.125	18.16	18.21375	18.085
8/11/2019 12:44:39	-118.514491	42.54355262	1234.02136	8/11/19	0.822673611	0.531006944	8/11/19 12:44	12:45:37	20.87888889	20.35	20.38888889	20.32333333	20.29666667	19.95111111	20.02222222	19.93	19.66666667	19.34777778	19.62666667	19.78	19.76222222	19.42666667	19.63777778	19.28444444	19.26666667	19.13222222	19.08333333	19.47	19.32444444	19.23444444	18.94	19.17111111	18.99888889	18.79666667	18.85333333	18.89	18.94111111	18.77666667	18.73111111	18.42777778	18.65333333	18.85333333	18.67	18.31888889	19.02666667	18.53888889	18.43333333	18.39777778	18.28666667
8/11/2019 12:44:40	-118.5144732	42.54354741	1233.953838	8/11/19	0.822685185	0.531018519	8/11/19 12:44	12:45:38	20.01555556	19.66222222	19.51666667	19.49333333	19.44555556	19.14666667	19.09111111	19.16666667	18.98	18.59888889	18.83444444	18.92888889	18.99222222	18.54333333	18.78222222	18.62444444	18.51666667	18.38222222	18.26888889	18.70222222	18.51222222	18.38111111	18.17666667	18.36333333	18.3	18.08222222	18.09777778	18.21888889	18.22555556	17.95111111	17.98	17.59333333	17.79333333	18.10111111	17.83333333	17.70444444	18.13	17.85777778	17.89333333	17.60333333	17.51888889
8/11/2019 12:44:41	-118.5144536	42.54354184	1233.9308	8/11/19	0.822696759	0.531030093	8/11/19 12:44	12:45:39	19.09375	18.95	18.79125	18.71625	18.74125	18.42125	18.45375	18.36	18.13125	17.8525	18.10625	18.22875	18.2775	17.9275	18.135	17.75375	17.71625	17.61375	17.66	17.94	17.73375	17.76375	17.36875	17.69375	17.47375	17.2725	17.34375	17.42	17.48625	17.32	17.34875	16.9075	17.265	17.34875	17.33125	16.9475	17.535	16.9875	17.2	17.1125	16.935
8/11/2019 12:44:42	-118.5144351	42.54353685	1233.877194	8/11/19	0.822708333	0.531041667	8/11/19 12:44	12:45:40	17.4125	17.13	17.2	17.115	17.3475	16.87875	16.94	16.81625	16.68875	16.4075	16.5125	16.69125	16.67875	16.33625	16.69625	16.22375	16.215	16.17875	16.0975	16.46125	16.33375	16.23375	15.98375	16.1775	16.02625	15.82125	15.895	16.00875	16.035	15.84625	15.7575	15.41375	15.67125	15.995	15.9175	15.46875	16.175	15.69625	15.95	15.7125	15.39125
8/11/2019 12:44:43	-118.5144177	42.54353147	1233.901581	8/11/19	0.822719907	0.531053241	8/11/19 12:44	12:45:41	16.80888889	16.61	16.66444444	16.56777778	16.54222222	16.21444444	16.16222222	16.23222222	15.98222222	15.67555556	15.86444444	16.03444444	16.05888889	15.67333333	15.88444444	15.70444444	15.52777778	15.44555556	15.44	15.80777778	15.57888889	15.52111111	15.37777778	15.58	15.40666667	15.21333333	15.23555556	15.39333333	15.35	15.18333333	15.11444444	14.9	15.03333333	15.12333333	15.25666667	14.91666667	15.53111111	14.94222222	15.35777778	15.11666667	14.94666667
8/11/2019 12:44:44	-118.5144114	42.54352818	1233.910677	8/11/19	0.822731481	0.531064815	8/11/19 12:44	12:45:42	17.13625	16.8025	16.8875	16.7175	16.745	16.58	16.5975	16.41625	16.27125	15.88875	16.12375	16.32625	16.38	16.00125	16.215	15.90875	15.77375	15.7525	15.74875	16.06625	15.8925	15.80125	15.595	15.86	15.645	15.49	15.56	15.64625	15.66875	15.43375	15.515	15.1725	15.38	15.75375	15.71375	15.33	16.06	15.4775	15.43625	15.44375	15.25375
8/11/2019 12:44:45	-118.5144115	42.5435222	1233.9366	8/11/19	0.822743056	0.531076389	8/11/19 12:44	12:45:43	17.67888889	17.37555556	17.37444444	17.28333333	17.26444444	17.02666667	16.94555556	16.90777778	16.83222222	16.40111111	16.62666667	16.80555556	16.80555556	16.50111111	16.73444444	16.48888889	16.40666667	16.27	16.20222222	16.58222222	16.45888889	16.42	16.19	16.24555556	16.19111111	15.88555556	16.00444444	16.1	16.14888889	16.01555556	16.02	15.52555556	15.84111111	16.10777778	16.29222222	15.66111111	16.36555556	15.98777778	15.88111111	16.04222222	15.71444444
8/11/2019 12:44:46	-118.5144139	42.54351473	1234.02544	8/11/19	0.82275463	0.531087963	8/11/19 12:44	12:45:44	17.12111111	16.90666667	16.93444444	16.71777778	16.67888889	16.34333333	16.53	16.56444444	16.24	15.92444444	16.15777778	16.26666667	16.37666667	15.99666667	16.18666667	15.89666667	15.86222222	15.74888889	15.73	16.07555556	15.87666667	15.83444444	15.62444444	15.76111111	15.70111111	15.43666667	15.45555556	15.67222222	15.61333333	15.46666667	15.53111111	15.12777778	15.42111111	15.76777778	15.90111111	15.17444444	15.97222222	15.36666667	15.60666667	15.40111111	15.23333333
8/11/2019 12:44:47	-118.5144184	42.54350571	1234.086865	8/11/19	0.822766204	0.531099537	8/11/19 12:44	12:45:45	16.90111111	16.70888889	16.70888889	16.49888889	16.61666667	16.11666667	16.16666667	16.25333333	16.06	15.63222222	15.88666667	16.08111111	16.08777778	15.76222222	15.98888889	15.66333333	15.49888889	15.53111111	15.47	15.89555556	15.66222222	15.65777778	15.41888889	15.59111111	15.51111111	15.33222222	15.32111111	15.44555556	15.44777778	15.34444444	15.23777778	14.89555556	15.29222222	15.57333333	15.45777778	15.17333333	15.70444444	15.06666667	15.45	15.21555556	15.21333333
8/11/2019 12:44:48	-118.5144231	42.5434959	1234.130032	8/11/19	0.822777778	0.531111111	8/11/19 12:44	12:45:46	16.74555556	16.34333333	16.44555556	16.20333333	16.25666667	16.02777778	16.04555556	15.94777778	15.79111111	15.52888889	15.61777778	15.80222222	15.90666667	15.48111111	15.72111111	15.38888889	15.33555556	15.33333333	15.23222222	15.63222222	15.45333333	15.35333333	15.18222222	15.35444444	15.30222222	15.05444444	15.08	15.14666667	15.23777778	15.02111111	15.03333333	14.61111111	14.81111111	15.24222222	14.97	14.9	15.37555556	14.99333333	15.31777778	14.98	14.85888889
8/11/2019 12:44:49	-118.5144277	42.54348713	1234.249484	8/11/19	0.822789352	0.531122685	8/11/19 12:44	12:45:47	19.445	19	19.21375	19.2775	19.16875	19.01	18.7625	18.86125	18.65	18.40625	18.53125	18.715	18.865	18.545	18.75375	18.41875	18.4125	18.24375	18.2825	18.64375	18.41625	18.4525	18.17375	18.3525	18.14375	17.97125	17.94625	18.1225	18.21875	17.925	17.9	17.66125	17.9375	18.0575	17.78125	17.535	18.18125	17.865	17.9625	17.885	17.71
8/11/2019 12:44:50	-118.5144313	42.54348296	1234.4142	8/11/19	0.822800926	0.531134259	8/11/19 12:44	12:45:48	20.06888889	19.79555556	19.85333333	19.54111111	19.79555556	19.51666667	19.50777778	19.43111111	19.38555556	18.97444444	19.28111111	19.39222222	19.51888889	19.11444444	19.4	19.1	18.96	18.89666667	18.92666667	19.24333333	19.07	19.08666667	18.89888889	19.01777778	18.92444444	18.69222222	18.74777778	18.80333333	18.89555556	18.76666667	18.70444444	18.27	18.51111111	18.57666667	18.35666667	18.00222222	18.46777778	18.40444444	18.60666667	18.40444444	18.40888889
8/11/2019 12:44:51	-118.514437	42.54348283	1234.413032	8/11/19	0.8228125	0.531145833	8/11/19 12:44	12:45:49	19.82	19.61444444	19.74222222	19.75777778	19.84666667	19.52	19.44777778	19.37222222	19.32333333	18.9	19.21888889	19.32555556	19.40666667	19.14777778	19.41	19.15222222	19.04111111	18.90888889	18.92666667	19.22777778	19.05555556	19.02444444	18.78666667	19.02666667	18.88222222	18.60666667	18.73	18.84333333	18.88222222	18.81444444	18.71111111	18.25555556	18.56444444	18.43222222	18.20666667	18.19222222	18.69555556	18.50333333	18.52666667	18.45	18.37222222
8/11/2019 12:44:52	-118.5144455	42.54348483	1234.354355	8/11/19	0.822824074	0.531157407	8/11/19 12:44	12:45:50	19.3675	18.88625	19.25875	19.0175	19.22625	18.92375	18.75375	18.79125	18.7225	18.42	18.5225	18.7575	18.81125	18.53375	18.68	18.3375	18.28625	18.26	18.2225	18.55875	18.46375	18.37125	18.0375	18.31625	18.2225	17.93125	17.98	18.10625	18.1575	18.06625	18.05625	17.63	17.82375	17.9325	17.61375	17.33	18.13625	17.79375	17.815	17.91375	17.6425
8/11/2019 12:44:53	-118.5144556	42.54348788	1234.338484	8/11/19	0.822835648	0.531168981	8/11/19 12:44	12:45:51	18.56333333	18.09	18.2	18.02222222	18.15222222	17.79555556	17.69	17.73	17.49777778	17.27666667	17.42222222	17.60333333	17.63222222	17.27111111	17.60777778	17.29111111	17.13333333	17.12222222	17.02777778	17.39555556	17.24777778	17.15555556	16.93777778	17.19777778	16.96333333	16.77222222	16.85555556	16.85555556	16.99222222	16.80888889	16.81222222	16.46111111	16.59222222	16.58444444	16.47555556	16.13222222	17.30666667	16.46111111	16.71333333	16.71333333	16.54
8/11/2019 12:44:54	-118.5144671	42.5434914	1234.323226	8/11/19	0.822847222	0.531180556	8/11/19 12:44	12:45:52	17.36666667	17.14222222	17.16111111	17.15555556	17.03222222	16.91	16.80555556	16.83777778	16.69888889	16.30222222	16.57666667	16.76222222	16.83222222	16.49333333	16.66444444	16.38111111	16.22777778	16.13888889	16.13666667	16.45333333	16.32555556	16.23555556	15.96111111	16.18111111	16.14555556	15.84222222	15.89333333	16.00333333	16.01666667	15.85	15.82333333	15.35555556	15.67777778	16.07222222	15.91666667	15.63666667	15.94111111	15.69333333	15.68666667	15.51777778	15.32
8/11/2019 12:44:55	-118.5144791	42.54349514	1234.3018	8/11/19	0.822858796	0.53119213	8/11/19 12:44	12:45:53	17.34125	17.08375	17.30375	16.965	17.25125	16.80875	16.71125	16.85125	16.455	16.19	16.4675	16.59125	16.64	16.33375	16.51875	16.15	16.14625	16.105	15.97375	16.32875	16.12	16.0775	15.86125	16.105	15.9475	15.72	15.85125	15.78125	15.93625	15.695	15.84875	15.37625	15.535	15.825	15.5875	15.5425	16.18375	15.47	15.65375	15.55875	15.27875
8/11/2019 12:44:56	-118.5144919	42.54349876	1234.26071	8/11/19	0.82287037	0.531203704	8/11/19 12:44	12:45:54	17.44111111	17.12777778	17.2	17.05444444	17.16444444	16.72555556	16.80444444	16.77666667	16.63333333	16.21888889	16.46777778	16.55555556	16.72111111	16.34666667	16.45333333	16.23333333	16.2	16.09777778	16.15444444	16.33666667	16.18777778	16.13222222	15.89333333	16.13777778	15.98777778	15.74777778	15.76666667	15.89666667	15.95444444	15.68444444	15.73333333	15.42888889	15.62666667	15.71888889	15.70888889	15.44666667	15.98666667	15.47666667	15.70666667	15.55444444	15.30444444
8/11/2019 12:44:57	-118.514505	42.54350225	1234.253258	8/11/19	0.822881944	0.531215278	8/11/19 12:44	12:45:55	17.70125	17.35	17.36875	17.26125	17.36375	16.98625	17.12625	17.0625	16.92375	16.58875	16.85375	16.92125	16.97625	16.645	16.81375	16.5175	16.5	16.3825	16.37375	16.715	16.61125	16.47625	16.20375	16.475	16.28375	16.10875	16.11375	16.22125	16.3125	16.055	15.9925	15.645	15.9575	16.2425	16.095	15.62625	16.2275	15.7875	15.92125	15.77875	15.5
8/11/2019 12:44:58	-118.5145184	42.54350605	1234.305355	8/11/19	0.822893519	0.531226852	8/11/19 12:44	12:45:56	18.0825	17.78875	17.95375	17.97625	17.83	17.68375	17.5525	17.57375	17.3475	17.1675	17.26625	17.4025	17.44375	16.98	17.32875	17.07	16.9425	16.82625	16.8075	17.215	16.96375	16.91	16.74875	16.88125	16.74125	16.46625	16.64125	16.66	16.66625	16.48125	16.465	16.1775	16.3375	16.39125	16.39	16.22375	16.555	16.17	16.5325	16.16875	16.07875
8/11/2019 12:44:59	-118.5145327	42.54350975	1234.476355	8/11/19	0.822905093	0.531238426	8/11/19 12:44	12:45:57	19.02333333	18.74666667	18.79555556	18.76111111	18.74444444	18.45222222	18.32333333	18.30555556	18.20111111	17.96222222	18.15	18.25333333	18.28555556	17.98666667	18.09222222	17.90555556	17.84444444	17.67222222	17.65111111	17.99111111	17.82888889	17.83444444	17.52222222	17.74444444	17.64333333	17.39888889	17.27	17.50888889	17.50111111	17.36555556	17.29777778	16.87444444	17.09555556	17.4	17.14333333	16.95333333	17.53555556	17.13	17.28666667	17.18333333	16.91
8/11/2019 12:45:00	-118.5145483	42.54351202	1234.781516	8/11/19	0.822916667	0.53125	8/11/19 12:45	12:45:58	19.14777778	18.79	18.81777778	18.71222222	18.76666667	18.61888889	18.53555556	18.40444444	18.40888889	17.91777778	18.19	18.27333333	18.40888889	18.01222222	18.27888889	17.92222222	17.84111111	17.79444444	17.77444444	18.09111111	17.91333333	17.91	17.62777778	17.83777778	17.69111111	17.37666667	17.46555556	17.59555556	17.58222222	17.45777778	17.38777778	16.98666667	17.09777778	17.62111111	17.18	17.14888889	17.57333333	17.10111111	17.32666667	17.24111111	17.05444444
8/11/2019 12:45:01	-118.5145647	42.5435163	1234.6434	8/11/19	0.822928241	0.531261574	8/11/19 12:45	12:45:59	18.46375	18.12375	18.24625	18.00625	18.15125	17.75625	17.7575	17.5675	17.6775	17.2375	17.49375	17.54	17.5675	17.30625	17.4825	17.155	17.02375	17.01625	16.9525	17.27625	17.175	17.0575	16.74625	17.075	16.8675	16.71375	16.71875	16.76375	16.8825	16.61125	16.58375	16.195	16.43125	16.63125	16.26	16.21375	16.855	16.375	16.51	16.215	16.1325
8/11/2019 12:45:02	-118.5145812	42.54352085	1234.430516	8/11/19	0.822939815	0.531273148	8/11/19 12:45	12:46:00	18.90444444	18.85888889	18.67222222	18.63111111	18.64555556	18.29555556	18.26111111	18.16111111	18.03777778	17.66333333	17.88	18.08111111	18.10555556	17.75555556	17.94333333	17.60666667	17.64666667	17.50888889	17.42111111	17.74444444	17.57888889	17.47444444	17.22444444	17.53666667	17.38444444	17.13	17.09555556	17.20888889	17.26666667	17.07111111	17.20777778	16.67222222	17.04111111	17.17888889	17.21444444	16.80333333	17.38555556	16.98888889	17.24666667	16.89888889	16.69666667
8/11/2019 12:45:03	-118.5145976	42.54352489	1234.331903	8/11/19	0.822951389	0.531284722	8/11/19 12:45	12:46:01	20.45375	20.27875	20.32375	20.185	20.26	19.68625	19.65125	19.57375	19.455	19.215	19.2775	19.48875	19.50625	19.05375	19.4175	19.10625	19.0025	18.91375	18.9375	19.17375	19.075	18.95125	18.6975	18.83125	18.715	18.52125	18.4825	18.62125	18.8025	18.54375	18.4625	18.15125	18.49	18.6725	18.60375	18.4375	19.00125	18.3275	18.3475	18.2575	18.145
8/11/2019 12:45:04	-118.5146133	42.54352853	1234.231903	8/11/19	0.822962963	0.531296296	8/11/19 12:45	12:46:02	21.85222222	21.74222222	21.53333333	21.45	21.42333333	21.27333333	21.05555556	20.97333333	20.88	20.54555556	20.80222222	20.91222222	20.9	20.55111111	20.74111111	20.44333333	20.41444444	20.26555556	20.30555556	20.42666667	20.44888889	20.36888889	20.11333333	20.32	20.15555556	19.92555556	19.90666667	19.98222222	19.99555556	19.92555556	19.94444444	19.66222222	19.89111111	20.11222222	20.13111111	19.55888889	20.27555556	19.54777778	19.79333333	19.63888889	19.49222222
8/11/2019 12:45:05	-118.5146289	42.54353094	1234.2608	8/11/19	0.822974537	0.53130787	8/11/19 12:45	12:46:03	24.20875	23.68375	23.55625	23.64	23.71	23.2475	23.23	23.19125	22.9825	22.605	22.805	22.9775	22.98375	22.63875	22.8325	22.54625	22.515	22.29625	22.36875	22.6275	22.44125	22.35375	22.1975	22.31625	22.16	21.87875	21.92125	22	22.02625	21.955	21.92875	21.49125	21.795	22.0425	22.06125	21.445	22.2175	21.64625	21.7925	21.61375	21.38
8/11/2019 12:45:06	-118.5146448	42.54353414	1234.175806	8/11/19	0.822986111	0.531319444	8/11/19 12:45	12:46:04	25.22777778	25.05222222	25.02444444	24.80555556	24.79333333	24.56444444	24.48222222	24.38	24.35777778	23.85	24.15777778	24.18777778	24.34444444	23.90111111	24.16222222	23.77777778	23.75222222	23.64111111	23.55444444	23.89666667	23.75666667	23.59	23.46	23.59111111	23.43111111	23.19333333	23.26555556	23.36666667	23.28222222	23.27444444	23.20111111	22.86111111	23.05888889	23.19666667	23.01444444	22.55222222	23.36	22.69222222	23.11	22.88777778	22.77777778
8/11/2019 12:45:07	-118.5146604	42.5435371	1234.187935	8/11/19	0.822997685	0.531331019	8/11/19 12:45	12:46:05	25.76111111	25.47777778	25.52222222	25.42555556	25.35	25.02888889	24.88888889	24.87222222	24.74888889	24.42666667	24.64666667	24.69333333	24.79	24.43555556	24.56333333	24.38222222	24.22333333	24.12777778	24.06333333	24.37444444	24.25222222	24.14222222	23.94111111	24.01777778	23.96777778	23.70888889	23.78888889	23.85777778	23.81222222	23.71555556	23.71222222	23.30444444	23.53333333	23.82666667	23.68555556	23.44666667	23.75333333	23.27888889	23.38333333	23.41111111	23.16444444
8/11/2019 12:45:08	-118.5146766	42.5435402	1234.165677	8/11/19	0.823009259	0.531342593	8/11/19 12:45	12:46:06	25.7975	25.56625	25.385	25.46875	25.525	25.12625	24.89125	24.9925	24.82	24.49375	24.65	24.76375	24.7525	24.4575	24.665	24.38	24.25625	24.1575	24.1	24.38625	24.24625	24.11625	23.95125	24.08375	24.0125	23.765	23.7525	23.90875	23.87	23.69125	23.7825	23.34875	23.5875	23.76125	23.805	23.44375	23.87875	23.455	23.5025	23.37875	23.11375
8/11/2019 12:45:09	-118.5146933	42.54354427	1234.106968	8/11/19	0.823020833	0.531354167	8/11/19 12:45	12:46:07	23.44666667	23.19	23.08888889	22.99333333	23.16444444	22.74	22.58	22.58555556	22.37	22.03	22.34888889	22.33666667	22.42222222	22.11333333	22.26888889	21.95111111	21.88777778	21.79111111	21.73666667	21.97333333	21.87777778	21.78555556	21.46333333	21.65666667	21.60444444	21.41666667	21.35333333	21.59222222	21.50444444	21.37444444	21.36888889	21.02222222	21.22888889	21.43888889	21.48333333	21.43555556	21.56333333	21.26777778	21.23888889	21.35111111	21.09222222
8/11/2019 12:45:10	-118.5147103	42.54354834	1234.0972	8/11/19	0.823032407	0.531365741	8/11/19 12:45	12:46:08	19.98888889	19.59333333	19.70222222	19.54666667	19.50555556	19.31888889	19.09111111	19.04333333	18.92555556	18.43555556	18.77777778	18.85333333	18.83222222	18.51777778	18.77777778	18.45777778	18.39777778	18.16111111	18.23333333	18.47777778	18.34	18.28888889	17.98333333	18.19777778	18.12111111	17.85333333	17.84	17.97555556	18.03222222	17.88555556	17.90111111	17.54444444	17.90444444	18.18111111	18.14666667	17.78	18.35111111	17.87555556	18.08	17.93333333	17.56333333
8/11/2019 12:45:11	-118.5147273	42.54355203	1234.157839	8/11/19	0.823043981	0.531377315	8/11/19 12:45	12:46:09	20.43375	20.4275	20.24875	20.05375	19.96625	19.7575	19.66375	19.625	19.4975	19.00375	19.3625	19.405	19.495	19.1	19.315	19.01625	19.00625	18.80125	18.9075	19.075	18.9875	18.8925	18.635	18.82125	18.69	18.46125	18.51375	18.545	18.58375	18.52375	18.54875	18.19125	18.5275	18.805	18.61125	18.3625	18.87625	18.18875	18.88	18.5475	18.03125
8/11/2019 12:45:12	-118.514745	42.54355572	1234.18329	8/11/19	0.823055556	0.531388889	8/11/19 12:45	12:46:10	23.27555556	23.08777778	22.84	22.95555556	22.78444444	22.35888889	22.34	22.23	22.18111111	21.74555556	22.06666667	22.04555556	22.12333333	21.86444444	22.04111111	21.68444444	21.58	21.37111111	21.52444444	21.59666667	21.58444444	21.44888889	21.26111111	21.38333333	21.20666667	20.95222222	21.11555556	21.10666667	21.16888889	21.00444444	21.01666667	20.60333333	20.86888889	21.08111111	21.02777778	20.73333333	21.33444444	20.73777778	20.94222222	20.82555556	20.65444444
8/11/2019 12:45:13	-118.5147629	42.54355959	1234.163129	8/11/19	0.82306713	0.531400463	8/11/19 12:45	12:46:11	24.07777778	23.77666667	23.74111111	23.88111111	23.66	23.38777778	23.21666667	23.16333333	23.09666667	22.63444444	22.95444444	23.04555556	23.06777778	22.74222222	22.86666667	22.52333333	22.51666667	22.38222222	22.37666667	22.56333333	22.46444444	22.35555556	22.13555556	22.29555556	22.11	21.99333333	21.99666667	22.05555556	22.10666667	21.87888889	21.93444444	21.67444444	21.73555556	21.99444444	21.99666667	21.66666667	22.01	21.71333333	21.98333333	21.81555556	21.49444444
8/11/2019 12:45:14	-118.5147806	42.54356322	1234.2268	8/11/19	0.823078704	0.531412037	8/11/19 12:45	12:46:12	24.585	24.35375	24.22	24.3975	24.2	23.9425	23.79125	23.79625	23.65375	23.24	23.5375	23.64875	23.58875	23.31375	23.46	23.1725	23.0425	22.95125	23.02125	23.195	23.08	22.9875	22.745	22.80875	22.81	22.4725	22.56375	22.63625	22.5375	22.47	22.44875	22.1675	22.415	22.70375	22.2875	22.33625	22.79125	22.21625	22.22	22.15375	21.96375
8/11/2019 12:45:15	-118.5147986	42.54356732	1234.369742	8/11/19	0.823090278	0.531423611	8/11/19 12:45	12:46:13	25.4875	25.29875	25.11125	25.2525	25.0275	24.74125	24.6625	24.45125	24.42125	24.025	24.24125	24.3875	24.36	24.03875	24.23	23.905	23.9175	23.7675	23.68625	23.86875	23.84	23.71	23.455	23.59875	23.53375	23.2525	23.245	23.375	23.39	23.24625	23.20875	22.91	23.11125	23.24	23.24875	22.81125	23.36375	22.92875	23.1425	23.01625	22.7275
8/11/2019 12:45:16	-118.5148173	42.54357188	1234.415548	8/11/19	0.823101852	0.531435185	8/11/19 12:45	12:46:14	25.04444444	24.90333333	24.71111111	24.80111111	24.65333333	24.42555556	24.28666667	24.22888889	24.08444444	23.6	23.87111111	23.93666667	24.03333333	23.73	23.90555556	23.61	23.47333333	23.40444444	23.33222222	23.64	23.44	23.38444444	23.14111111	23.28888889	23.07222222	22.95111111	22.98111111	23.06	23.02555556	22.92111111	22.95777778	22.6	22.79555556	22.96333333	22.89333333	22.67666667	23.10888889	22.68555556	22.61	22.66666667	22.42111111
8/11/2019 12:45:17	-118.5148364	42.54357722	1234.493129	8/11/19	0.823113426	0.531446759	8/11/19 12:45	12:46:15	25.26555556	25.35111111	25.04777778	25.26	24.99888889	24.74111111	24.46444444	24.43222222	24.32888889	23.97555556	24.20111111	24.27333333	24.24555556	24.03777778	24.05777778	23.82777778	23.74222222	23.59555556	23.66	23.82555556	23.76333333	23.50111111	23.36	23.45	23.44111111	23.10333333	23.11	23.14555556	23.27555556	23.09666667	23.04888889	22.71	22.92666667	23.19	23.08444444	22.9	23.54111111	22.84888889	23.15666667	22.68555556	22.73777778
8/11/2019 12:45:18	-118.5148562	42.54358256	1234.6314	8/11/19	0.823125	0.531458333	8/11/19 12:45	12:46:16	25.3375	25.17875	25.12875	25.10125	24.995	24.53875	24.52875	24.535	24.3575	23.96625	24.165	24.125	24.27375	23.94875	24.0075	23.75125	23.79125	23.51875	23.54625	23.7825	23.77375	23.39	23.3	23.3975	23.245	22.945	23.01375	23.15375	23.0825	22.99	22.95625	22.68	22.87875	23.04625	23.25625	22.78375	23.33875	22.79625	23.0225	22.98625	22.4575
8/11/2019 12:45:19	-118.5148771	42.54358806	1234.855742	8/11/19	0.823136574	0.531469907	8/11/19 12:45	12:46:17	23.10555556	22.98222222	22.63777778	22.85888889	22.76222222	22.41555556	22.26444444	22.24666667	22.10222222	21.58555556	21.86444444	21.99666667	21.99777778	21.62444444	21.71888889	21.53555556	21.38555556	21.25222222	21.22666667	21.43222222	21.34222222	21.19111111	21.00555556	21.15777778	20.96444444	20.78111111	20.75666667	20.88444444	20.85888889	20.72111111	20.77888889	20.53777778	20.75	21.04666667	21.07222222	20.88111111	21.60222222	20.68	20.81555556	20.83888889	20.47666667
8/11/2019 12:45:20	-118.514899	42.54359339	1235.009161	8/11/19	0.823148148	0.531481481	8/11/19 12:45	12:46:18	22.68666667	22.48222222	22.30777778	22.36666667	22.13222222	21.88444444	21.58777778	21.60111111	21.54111111	21.11444444	21.38	21.35555556	21.43111111	21.09333333	21.33888889	21.00222222	20.97333333	20.81555556	20.80333333	20.98333333	20.90777778	20.84666667	20.47	20.72222222	20.52	20.31555556	20.40111111	20.40222222	20.46222222	20.41888889	20.25444444	19.97444444	20.16666667	20.69444444	20.81888889	20.24555556	20.88	20.06888889	20.21666667	20.32555556	19.65666667
8/11/2019 12:45:21	-118.5149212	42.54359809	1235.159806	8/11/19	0.823159722	0.531493056	8/11/19 12:45	12:46:19	23.17125	23.03625	22.75	22.7875	22.79875	22.4875	22.30375	22.28125	22.185	21.76625	22.01125	22.06	22.02625	21.6825	21.82375	21.5225	21.3975	21.26	21.29125	21.52125	21.40375	21.34875	21.08	21.21	21.07125	20.75625	20.89375	20.93375	20.955	20.67375	20.7425	20.47875	20.85	21.1475	21.24	20.86	21.31625	20.69625	20.77	20.94625	20.5225
8/11/2019 12:45:22	-118.5149422	42.54360285	1235.237935	8/11/19	0.823171296	0.53150463	8/11/19 12:45	12:46:20	23.15	22.88125	22.9	22.79	22.7925	22.35875	22.3075	22.2175	22.06625	21.755	21.98125	22.04125	22.02375	21.68125	21.8825	21.52875	21.4975	21.30125	21.375	21.5225	21.4425	21.335	21.02375	21.315	21.16625	20.87375	20.8175	20.98875	20.9925	20.78625	20.85125	20.525	20.71	20.99875	21.14125	20.635	21.1825	20.7025	20.605	20.7775	20.1625
8/11/2019 12:45:23	-118.514954	42.54360414	1235.1878	8/11/19	0.82318287	0.531516204	8/11/19 12:45	12:46:21	24.06666667	23.98666667	23.77666667	23.56555556	23.60777778	23.24222222	23.02888889	22.95888889	22.91555556	22.49777778	22.74111111	22.74222222	22.79666667	22.55333333	22.79222222	22.38	22.32111111	22.13777778	22.21333333	22.38111111	22.33222222	22.15333333	21.97444444	22.07555556	21.94	21.76333333	21.80222222	21.91888889	21.85	21.7	21.75555556	21.37666667	21.64777778	22.24333333	22.08333333	21.74777778	22.05666667	21.44888889	21.69555556	21.42777778	21.08666667
8/11/2019 12:45:24	-118.51496	42.54359785	1235.149871	8/11/19	0.823194444	0.531527778	8/11/19 12:45	12:46:22	23.69	23.58111111	23.38777778	23.38333333	23.24333333	22.94111111	22.78555556	22.54222222	22.52888889	22.18	22.41555556	22.45333333	22.52777778	22.23888889	22.36555556	22.03222222	21.98222222	21.87333333	21.87888889	22.01555556	21.92888889	21.78	21.60555556	21.69333333	21.65333333	21.45222222	21.45777778	21.45666667	21.46333333	21.32777778	21.23888889	20.99666667	21.19222222	21.62666667	21.70111111	21.38	21.90222222	21.17777778	21.31666667	21.00111111	20.62222222
8/11/2019 12:45:25	-118.5149668	42.54358628	1235.254258	8/11/19	0.823206019	0.531539352	8/11/19 12:45	12:46:23	22.02875	22.0275	21.7625	21.75	21.57625	21.285	21.09625	20.9875	20.91375	20.4925	20.76	20.7375	20.7875	20.44	20.58375	20.32625	20.24125	20.115	20.11375	20.25625	20.115	20.05375	19.81875	20.02375	19.76	19.60875	19.56875	19.77125	19.61375	19.6325	19.55125	19.2775	19.4475	20.005	19.935	20	20.3	19.61375	19.67625	19.67875	19.0775
8/11/2019 12:45:26	-118.5149727	42.54357396	1235.386	8/11/19	0.823217593	0.531550926	8/11/19 12:45	12:46:24	21.46222222	21.24222222	21.04444444	21.03555556	20.91888889	20.61333333	20.48111111	20.30444444	20.21222222	19.94	20.15333333	20.27555556	20.24111111	19.88666667	20.03888889	19.73111111	19.77333333	19.64444444	19.59777778	19.78111111	19.63444444	19.56333333	19.34333333	19.47111111	19.33222222	19.11777778	19.14888889	19.29444444	19.33666667	19.13777778	19.22777778	18.81444444	19.02444444	19.39333333	19.54	19.42555556	19.56777778	19.06666667	19.12	18.95333333	18.43666667
8/11/2019 12:45:27	-118.5149741	42.54356842	1235.598	8/11/19	0.823229167	0.5315625	8/11/19 12:45	12:46:25	20.98666667	20.97555556	20.66777778	20.52555556	20.45555556	20.20444444	19.94666667	19.95888889	19.82111111	19.46777778	19.69666667	19.78333333	19.85555556	19.44888889	19.58444444	19.35333333	19.37222222	19.19111111	19.25	19.39333333	19.40555556	19.12888889	18.98666667	19.12555556	18.88333333	18.74444444	18.80555556	18.79111111	18.88222222	18.74777778	18.85333333	18.40555556	18.63888889	18.98333333	18.92222222	18.64888889	18.94222222	18.75444444	18.67333333	18.52	18.11666667
8/11/2019 12:45:28	-118.5149688	42.54356579	1235.698161	8/11/19	0.823240741	0.531574074	8/11/19 12:45	12:46:26	20.87714286	20.72142857	20.60571429	20.62	20.60571429	20.18714286	20.00714286	20.00142857	19.91571429	19.51857143	19.73571429	19.86428571	19.81857143	19.52857143	19.66571429	19.42285714	19.35	19.20714286	19.31714286	19.43714286	19.41	19.14714286	19.04571429	19.27857143	19.10857143	18.87857143	18.84857143	18.92	18.92142857	18.74571429	18.83571429	18.53	18.68571429	19.06428571	18.9	18.90285714	19.30285714	18.51571429	18.78571429	18.58142857	18.13857143
8/11/2019 12:45:29	-118.5149566	42.54356315	1235.657097	8/11/19	0.823252315	0.531585648	8/11/19 12:45	12:46:27	21.7025	21.50125	21.25625	21.105	21.07	20.78125	20.64375	20.58375	20.46375	20.10875	20.345	20.37	20.355	20.055	20.31125	20.04	19.96875	19.76125	19.85375	20.07875	20.0375	19.83375	19.645	19.92875	19.665	19.53625	19.5875	19.545	19.60125	19.57	19.48125	19.15375	19.33625	19.6775	19.8175	19.35125	19.8775	19.0925	19.0675	19.2225	18.56875
8/11/2019 12:45:30	-118.51494	42.54356034	1235.637774	8/11/19	0.823263889	0.531597222	8/11/19 12:45	12:46:28	21.90777778	21.63888889	21.63222222	21.61222222	21.41111111	21.16333333	20.85333333	20.92444444	20.74555556	20.48	20.77444444	20.68	20.77	20.38222222	20.61111111	20.29111111	20.27444444	20.09222222	20.11333333	20.37111111	20.28888889	20.09666667	19.87222222	20.16444444	19.92444444	19.70111111	19.81777778	19.75444444	19.83666667	19.61	19.73888889	19.36111111	19.60444444	19.89666667	19.92111111	19.93	19.88888889	19.51111111	19.57333333	19.62444444	18.97666667
8/11/2019 12:45:31	-118.5149221	42.54355688	1235.618581	8/11/19	0.823275463	0.531608796	8/11/19 12:45	12:46:29	21.31222222	21.54	21.29777778	21.04444444	21.06111111	20.80111111	20.58444444	20.47555556	20.55222222	20.12555556	20.34666667	20.31333333	20.42	20.02888889	20.20777778	19.89222222	19.85555556	19.59111111	19.66777778	19.83333333	19.74555556	19.60333333	19.31777778	19.56333333	19.29555556	19.19111111	19.27222222	19.21333333	19.18222222	19.16444444	19.16666667	18.79444444	18.99	19.49	19.43666667	19.06333333	19.55333333	18.97888889	19.26666667	19.15888889	18.81666667
8/11/2019 12:45:32	-118.5149043	42.54355326	1235.6424	8/11/19	0.823287037	0.53162037	8/11/19 12:45	12:46:30	21.0975	20.86125	20.92375	20.90375	20.82	20.51625	20.3075	20.27375	20.20625	19.7575	20.06625	20.06625	20.09375	19.69625	19.85	19.55	19.53375	19.34625	19.42625	19.46	19.535	19.30375	19.0925	19.2075	19.1075	18.8675	18.94375	18.90625	18.9275	18.97	18.935	18.54625	18.77625	19.24125	19.05375	18.48625	19.13375	18.77	19.015	18.98125	18.50625
8/11/2019 12:45:33	-118.5148863	42.54354996	1235.715355	8/11/19	0.823298611	0.531631944	8/11/19 12:45	12:46:31	21.82555556	21.65333333	21.59777778	21.21333333	21.53333333	21.07555556	20.94333333	20.94888889	20.84777778	20.45111111	20.69222222	20.73666667	20.75111111	20.48222222	20.62444444	20.40555556	20.15111111	20.03222222	20.05555556	20.28333333	20.18555556	19.97333333	19.72444444	19.97333333	19.84444444	19.59555556	19.59555556	19.63	19.60222222	19.48333333	19.62222222	19.18444444	19.46444444	19.80888889	19.80222222	19.45111111	19.93	19.31333333	19.51333333	19.66555556	19.09555556
8/11/2019 12:45:34	-118.5148677	42.54354664	1235.862	8/11/19	0.823310185	0.531643519	8/11/19 12:45	12:46:32	21.98222222	21.96333333	21.83888889	21.92777778	21.76777778	21.49888889	21.35333333	21.23777778	21.12333333	20.84111111	21.03888889	21.03222222	21.10111111	20.82111111	20.97777778	20.68111111	20.61777778	20.36777778	20.48666667	20.59111111	20.57888889	20.36	20.15111111	20.35444444	20.22444444	19.97444444	20.02111111	20.08888889	19.99111111	19.96444444	19.92555556	19.61111111	19.82111111	20.08555556	20.41888889	19.88	20.36	19.68888889	19.79333333	19.76777778	19.42555556
8/11/2019 12:45:35	-118.5148494	42.5435433	1235.994484	8/11/19	0.823321759	0.531655093	8/11/19 12:45	12:46:33	22.3875	22.255	22.25625	22.11125	22.10375	21.73	21.715	21.52	21.5475	21.1025	21.415	21.385	21.44125	21.02125	21.18875	20.96875	20.985	20.77375	20.84875	20.9975	20.7925	20.73125	20.55875	20.6875	20.43	20.29875	20.2975	20.40125	20.39875	20.27375	20.325	20.0575	20.1325	20.47125	20.21	20.28875	20.33625	20.2025	20.075	20.145	19.9275
8/11/2019 12:45:36	-118.5148313	42.54354031	1236.030387	8/11/19	0.823333333	0.531666667	8/11/19 12:45	12:46:34	23.76555556	23.44222222	23.47444444	23.42	23.34222222	23.08444444	22.81	22.87555556	22.87666667	22.39888889	22.70555556	22.63444444	22.67555556	22.37888889	22.53666667	22.30222222	22.23	21.98666667	22.02777778	22.19	22.16777778	21.94777778	21.74666667	21.95	21.80222222	21.55444444	21.69888889	21.66333333	21.73	21.50888889	21.58111111	21.26333333	21.47222222	21.71666667	21.57666667	21.31888889	21.76777778	21.35333333	21.70333333	21.37555556	21.08222222
8/11/2019 12:45:37	-118.514814	42.54353796	1235.9536	8/11/19	0.823344907	0.531678241	8/11/19 12:45	12:46:35	24.4225	24.2675	24.4275	24.12125	24.27875	23.88125	23.6725	23.7075	23.7525	23.32625	23.50125	23.5025	23.64375	23.24875	23.52875	23.16375	23.1225	22.8675	22.86375	23.05125	23.0175	22.8325	22.62	22.7875	22.62625	22.42875	22.545	22.51125	22.5475	22.43375	22.4275	22.14	22.37625	22.65	22.46375	22.3825	22.605	22.1625	22.4675	22.30375	21.84875
8/11/2019 12:45:38	-118.5147969	42.54353522	1235.929129	8/11/19	0.823356481	0.531689815	8/11/19 12:45	12:46:36	24.79444444	24.73222222	24.46333333	24.49	24.48888889	24.08777778	24.12777778	23.88	23.91666667	23.46666667	23.68333333	23.76666667	23.75555556	23.52	23.61333333	23.40666667	23.28	23.17	23.21111111	23.31666667	23.21888889	23.07222222	22.92111111	23.05444444	22.89333333	22.69888889	22.75444444	22.77555556	22.80888889	22.67666667	22.63555556	22.38888889	22.55777778	22.89333333	22.64111111	22.60222222	22.85777778	22.36888889	22.55666667	22.68222222	21.94888889
8/11/2019 12:45:39	-118.5147796	42.54353204	1235.936355	8/11/19	0.823368056	0.531701389	8/11/19 12:45	12:46:37	24.655	24.5025	24.37375	24.345	24.40375	23.995	23.85375	23.75	23.775	23.3875	23.66875	23.65	23.6225	23.405	23.49375	23.31	23.22	22.98625	23.0975	23.28625	23.10375	23.03375	22.72625	22.92375	22.81125	22.4975	22.7425	22.55625	22.675	22.6225	22.6425	22.15125	22.31125	22.59375	22.61	22.16875	22.67625	22.28875	22.505	22.27625	21.855
8/11/2019 12:45:40	-118.5147643	42.54352905	1235.96275	8/11/19	0.82337963	0.531712963	8/11/19 12:45	12:46:38	23.6025	23.65625	23.57	23.44	23.4775	23.21125	23.03125	22.90625	22.85875	22.535	22.8425	22.77875	22.77375	22.4325	22.63375	22.42875	22.33375	22.17875	22.3425	22.41	22.44125	22.125	21.97375	22.13125	22.00375	21.76375	21.80875	21.86125	21.9125	21.81375	21.7825	21.43875	21.62	21.87875	21.88375	21.3225	21.9775	21.435	21.6725	21.62	21.11375
8/11/2019 12:45:41	-118.5147476	42.54352544	1235.986973	8/11/19	0.823391204	0.531724537	8/11/19 12:45	12:46:39	23.05666667	23.04555556	22.83333333	22.88	22.81666667	22.50333333	22.38888889	22.34666667	22.32666667	21.90777778	22.18222222	22.16555556	22.22222222	21.91555556	22.01444444	21.82666667	21.70555556	21.56	21.66444444	21.69222222	21.66555556	21.54333333	21.31	21.53	21.35111111	21.09222222	21.27444444	21.24111111	21.23	21.11444444	21.09333333	20.75	20.94333333	21.24777778	20.61888889	20.64111111	21.22555556	20.74888889	20.91666667	20.78888889	20.39666667
8/11/2019 12:45:42	-118.5147283	42.54352104	1236.057906	8/11/19	0.823402778	0.531736111	8/11/19 12:45	12:46:40	22.76777778	22.59666667	22.51111111	22.54777778	22.57444444	22.28777778	22.04555556	21.98111111	21.98444444	21.67777778	21.92888889	21.82777778	21.91888889	21.65333333	21.72333333	21.48666667	21.41333333	21.28	21.25777778	21.42	21.38666667	21.25111111	21.04777778	21.19	20.99	20.97444444	20.87333333	20.98222222	21.01	20.83777778	20.81222222	20.44222222	20.79888889	21.09555556	20.73222222	20.47666667	20.81111111	20.40555556	20.60666667	20.60777778	20.30555556
8/11/2019 12:45:43	-118.5147103	42.54351693	1236.1528	8/11/19	0.823414352	0.531747685	8/11/19 12:45	12:46:41	21.45571429	21.30714286	21.49857143	21.27428571	21.34	20.98	20.83714286	20.71571429	20.83428571	20.42857143	20.64	20.66	20.6	20.33714286	20.56714286	20.28857143	20.20571429	20.00714286	20.12571429	20.18142857	20.21714286	20.12428571	19.79	20.05142857	19.90428571	19.67428571	19.74714286	19.76	19.72714286	19.62142857	19.68571429	19.38285714	19.58714286	19.68571429	19.54857143	19.21	19.89857143	19.30857143	19.61142857	19.33714286	19.07857143
8/11/2019 12:45:44	-118.5146929	42.5435131	1236.194032	8/11/19	0.823425926	0.531759259	8/11/19 12:45	12:46:42	20.00222222	19.92666667	19.81222222	19.72555556	19.62333333	19.42666667	19.25333333	19.12777778	19.12	18.79444444	18.99777778	19.04777778	19.01111111	18.71	18.87555556	18.73888889	18.59666667	18.38888889	18.61444444	18.62333333	18.57777778	18.51666667	18.26444444	18.39555556	18.25222222	18.01888889	18.18666667	18.15888889	18.27555556	18.13	18.15	17.83333333	17.99444444	18.42444444	18.12111111	17.92	18.16222222	17.71222222	18.3	17.93777778	17.53666667
8/11/2019 12:45:45	-118.5146751	42.54350974	1236.2502	8/11/19	0.8234375	0.531770833	8/11/19 12:45	12:46:43	19.7475	19.73125	19.53375	19.56875	19.72125	19.28625	19.1075	19.02875	19.04375	18.65375	18.95	18.92125	19.01625	18.65625	18.83	18.58	18.63125	18.395	18.44625	18.63125	18.5225	18.41875	18.205	18.36875	18.3025	17.985	18.0175	18.2425	18.235	18.085	18.215	17.74875	17.965	18.525	18.505	17.7875	18.445	17.7	18.01	17.87	17.57875
8/11/2019 12:45:46	-118.5146578	42.54350601	1236.365065	8/11/19	0.823449074	0.531782407	8/11/19 12:45	12:46:44	21.56142857	21.38714286	21.36428571	21.43857143	21.57857143	20.98	20.84857143	20.73714286	20.77857143	20.41142857	20.69857143	20.67857143	20.64571429	20.42428571	20.46857143	20.31	20.23571429	20.08142857	20.10571429	20.31142857	20.22	20.06857143	19.86571429	20.06	20.04	19.75857143	19.71142857	19.74142857	19.81714286	19.71571429	19.70142857	19.36571429	19.25285714	19.64714286	19.57	19.45571429	19.84714286	19.62571429	19.33428571	19.55142857	19.35285714
8/11/2019 12:45:47	-118.5146402	42.54350248	1236.367581	8/11/19	0.823460648	0.531793981	8/11/19 12:45	12:46:45	21.42666667	21.46333333	21.25	20.985	21.24333333	20.88166667	20.62	20.55333333	20.64833333	20.34	20.61333333	20.625	20.62833333	20.39333333	20.58333333	20.27333333	20.25833333	20.07333333	20.12333333	20.30166667	20.245	20.11166667	19.84166667	20.12	19.90833333	19.81	19.805	19.795	19.79	19.60833333	19.81333333	19.22666667	19.70166667	19.645	19.47333333	19.00166667	19.56333333	19.12333333	19.48	19.45666667	18.98166667
8/11/2019 12:45:48	-118.5146217	42.54349972	1236.303839	8/11/19	0.823472222	0.531805556	8/11/19 12:45	12:46:46	19.49444444	19.53444444	19.51111111	19.66	19.57222222	19.34333333	19.10777778	19.05222222	19.12555556	18.72444444	19.08111111	19.07	19.13888889	18.82777778	18.96666667	18.68888889	18.75	18.54555556	18.59555556	18.79666667	18.73777778	18.57333333	18.35333333	18.57	18.50777778	18.24888889	18.30444444	18.28777778	18.26333333	18.17222222	18.27888889	17.81555556	17.83777778	18.12	17.68444444	17.46555556	18.17222222	17.91111111	18	17.88	17.49444444
8/11/2019 12:45:49	-118.5146038	42.54349668	1236.3342	8/11/19	0.823483796	0.53181713	8/11/19 12:45	12:46:47	19.12	19.085	19.0575	19.09	19.21	18.9575	18.81125	18.66	18.82	18.49875	18.66	18.67125	18.77875	18.5075	18.60625	18.40875	18.39375	18.1925	18.26125	18.4475	18.43875	18.32375	18.00625	18.15125	18.095	17.87	18.05375	17.94125	17.9525	17.885	17.76875	17.605	17.70125	17.74	17.43625	16.88375	17.63375	17.3975	17.56	17.60125	17.19875
8/11/2019 12:45:50	-118.5145862	42.54349252	1236.467903	8/11/19	0.82349537	0.531828704	8/11/19 12:45	12:46:48	19.65833333	19.74666667	19.68166667	19.515	19.7	19.39666667	19.25333333	19.25	19.36166667	19.00833333	19.26	19.30666667	19.27	18.965	19.195	18.97833333	18.88666667	18.78333333	18.82833333	19.00166667	18.91	18.78333333	18.46666667	18.81666667	18.595	18.405	18.535	18.42666667	18.53166667	18.38666667	18.39833333	18.13666667	18.35	18.41166667	17.77666667	17.73166667	18.46833333	17.92333333	18.44	18.23666667	17.8
8/11/2019 12:45:51	-118.5145689	42.5434882	1236.574516	8/11/19	0.823506944	0.531840278	8/11/19 12:45	12:46:49	19.64875	19.7025	19.76	19.68	19.59625	19.4175	19.26875	19.2425	19.285	19.01375	19.22	19.355	19.38625	19.00875	19.13875	18.90375	18.9025	18.79625	18.9125	18.9625	18.85875	18.825	18.645	18.765	18.665	18.3875	18.48625	18.56	18.65875	18.58625	18.44625	18.13875	18.32	18.455	17.83125	17.76875	18.00375	17.9125	18.07	18.1175	17.8425
8/11/2019 12:45:52	-118.5145516	42.5434846	1236.605968	8/11/19	0.823518519	0.531851852	8/11/19 12:45	12:46:50	18.74	18.8	18.92125	18.71125	18.8875	18.63625	18.3975	18.3	18.48125	18.01625	18.34875	18.37375	18.3725	18.12125	18.29375	18.0175	18.035	17.94	18.015	18.05625	18.11875	17.93	17.64	17.8625	17.7425	17.555	17.65375	17.5875	17.58625	17.59625	17.5375	17.27375	17.38875	17.55875	17.26	16.66125	17.59875	17.035	17.4175	17.3525	16.85625
8/11/2019 12:45:53	-118.5145358	42.54348171	1236.62564	8/11/19	0.823530093	0.531863426	8/11/19 12:45	12:46:51	18.34375	18.26	18.3375	18.10375	18.4575	18.1725	17.91	17.9325	17.94	17.5925	17.8825	17.845	17.92875	17.55	17.795	17.57375	17.51375	17.3475	17.44875	17.5925	17.56	17.44	17.20375	17.4125	17.26375	17.07	17.22	17.09	17.19875	17.155	17.0075	16.73875	16.8525	17.2725	16.66375	16.6225	17.07625	16.7425	16.72	16.9325	16.435
8/11/2019 12:45:54	-118.5145182	42.54347863	1236.695	8/11/19	0.823541667	0.531875	8/11/19 12:45	12:46:52	17.76625	17.605	17.75875	17.71875	17.78375	17.57875	17.34	17.32125	17.315	16.91625	17.2075	17.16375	17.32	17.0075	17.1575	16.96125	16.97875	16.70125	16.8575	16.97625	16.95	16.86	16.5575	16.865	16.735	16.465	16.58375	16.5225	16.58375	16.50375	16.47125	16.1475	16.2825	16.8275	16.42875	16.07375	16.5225	16.155	16.39625	16.24125	15.84375
8/11/2019 12:45:55	-118.514499	42.54347595	1236.73929	8/11/19	0.823553241	0.531886574	8/11/19 12:45	12:46:53	17.34111111	17.39222222	17.38111111	17.23111111	17.27333333	17.13666667	16.76777778	16.91888889	16.83	16.42222222	16.79555556	16.83666667	16.88777778	16.57222222	16.76444444	16.52444444	16.52555556	16.24666667	16.42555556	16.46111111	16.51222222	16.33777778	16.15111111	16.40777778	16.22888889	16.01444444	16.09222222	16.07666667	16.12	16.13111111	16.09	15.71111111	15.68666667	16.16222222	15.70888889	15.39777778	16.02666667	15.79333333	15.84111111	15.82666667	15.50111111
8/11/2019 12:45:56	-118.5144818	42.54347328	1236.845258	8/11/19	0.823564815	0.531898148	8/11/19 12:45	12:46:54	17.75	17.625	17.60125	17.65125	17.83	17.49	17.32875	17.29625	17.48875	16.9125	17.21625	17.2575	17.3275	17.07125	17.26625	17.02625	17.0525	16.795	16.94625	17.0425	17.04125	16.8725	16.64625	16.9325	16.7825	16.49125	16.57375	16.6275	16.74875	16.7025	16.55125	16.2	16.2975	16.60125	16.1625	15.90625	16.45	16.09875	16.28	16.1325	16.01875
8/11/2019 12:45:57	-118.5144718	42.5434702	1236.999968	8/11/19	0.823576389	0.531909722	8/11/19 12:45	12:46:55	18.15777778	18.10222222	17.99222222	17.93222222	18.11222222	17.79888889	17.58444444	17.69555556	17.66111111	17.39111111	17.61555556	17.58444444	17.67666667	17.39888889	17.55555556	17.32111111	17.32555556	17.13333333	17.21	17.44111111	17.33444444	17.18888889	17.01444444	17.22666667	17.06666667	16.87777778	17.05111111	17.01444444	16.97555556	16.88333333	16.90222222	16.61222222	16.59222222	16.64111111	16.32666667	16.32222222	16.63222222	16.43777778	16.61444444	16.59333333	16.12777778
8/11/2019 12:45:58	-118.5144737	42.5434572	1237.1872	8/11/19	0.823587963	0.531921296	8/11/19 12:45	12:46:56	18.3725	18.34625	18.3225	18.42875	18.5725	18.1175	17.9875	18.00875	18.03125	17.7825	17.97375	18.0625	17.96875	17.77875	17.93125	17.675	17.64	17.51875	17.65375	17.77375	17.66875	17.60625	17.24625	17.54875	17.5175	17.25	17.29125	17.27625	17.41625	17.2975	17.22125	16.8425	16.89375	17.0375	16.94625	16.39875	17.29875	16.84375	16.805	16.8525	16.4925
8/11/2019 12:45:59	-118.5144791	42.54343893	1237.378097	8/11/19	0.823599537	0.53193287	8/11/19 12:45	12:46:57	22.70555556	22.65111111	22.67222222	22.56555556	22.68888889	22.48333333	22.26888889	22.37888889	22.44444444	22.08555556	22.34444444	22.38111111	22.37222222	22.21111111	22.28333333	22.09555556	22.11333333	21.90222222	22.09333333	22.16888889	22.20555556	22.07333333	21.81111111	22.07222222	21.99777778	21.76222222	21.88666667	21.84222222	21.90888889	21.81333333	21.74777778	21.4	21.51222222	21.55222222	21.36888889	20.88222222	21.24666667	21.34222222	21.55666667	21.58222222	21.19777778
8/11/2019 12:46:00	-118.5144841	42.54343227	1237.434774	8/11/19	0.823611111	0.531944444	8/11/19 12:46	12:46:58	22.43666667	22.26	22.41666667	22.46888889	22.50555556	22.26555556	21.96444444	22.00222222	22.00333333	21.74666667	22.11444444	22.04	22.09	21.84555556	22.11333333	21.78666667	21.77222222	21.50666667	21.73666667	21.82444444	21.83777778	21.60222222	21.48222222	21.73666667	21.53333333	21.28333333	21.41666667	21.48111111	21.54555556	21.53555556	21.46222222	21.09333333	21.11888889	21.15666667	20.73222222	20.75111111	21.38111111	20.97555556	20.80111111	21.10444444	20.97888889
8/11/2019 12:46:01	-118.5144937	42.54343237	1237.371903	8/11/19	0.823622685	0.531956019	8/11/19 12:46	12:46:59	21.46125	21.565	21.60625	21.4725	21.58	21.24125	21.07875	21.22625	21.215	20.82375	21.09	21.02125	21.2225	20.9425	21.2	20.86	20.8325	20.6875	20.875	21.03375	20.975	20.78	20.62625	20.8275	20.77125	20.51875	20.605	20.55625	20.685	20.7125	20.58625	20.26	20.30125	20.54	20.16	19.91875	20.28375	20.1275	20.51375	20.4575	20.10125
8/11/2019 12:46:02	-118.5145073	42.54343403	1237.332419	8/11/19	0.823634259	0.531967593	8/11/19 12:46	12:47:00	22.2825	22.49125	22.3725	22.38375	22.5875	22.28375	22.21375	22.20125	22.2075	21.88375	22.26375	22.24375	22.2675	22.1025	22.1875	22.01625	22.01	21.74125	21.90875	21.94875	22.07375	21.83875	21.65375	21.88875	21.8525	21.67	21.67	21.665	21.82375	21.7	21.6875	21.33125	21.4775	21.41125	20.83625	20.6725	21.24625	21.09875	21.275	21.47625	21.31375
8/11/2019 12:46:03	-118.5145212	42.54343583	1237.31725	8/11/19	0.823645833	0.531979167	8/11/19 12:46	12:47:01	21.23666667	21.24222222	21.18222222	21.20777778	21.33666667	21.07444444	20.74111111	20.72222222	20.88222222	20.50555556	20.77888889	20.75777778	20.80777778	20.53555556	20.73111111	20.51666667	20.48111111	20.35777778	20.38444444	20.60222222	20.58	20.39222222	20.18333333	20.41888889	20.23	20.04888889	20.14222222	20.06888889	20.18666667	20.17444444	20.03555556	19.68111111	19.62222222	19.87666667	19.36444444	19.19444444	19.85111111	19.79555556	19.54777778	19.91555556	19.52333333
8/11/2019 12:46:04	-118.5145384	42.54343882	1237.286486	8/11/19	0.823657407	0.531990741	8/11/19 12:46	12:47:02	17.55125	17.57	17.745	17.7525	17.785	17.52	17.34	17.19625	17.4175	17.00875	17.24	17.30375	17.29375	17.09	17.2525	16.97125	17.0125	16.775	16.865	16.93375	16.98125	16.81625	16.64125	16.90625	16.70625	16.5	16.5925	16.545	16.6675	16.625	16.535	16.16125	16.29875	16.48375	16.10375	15.86125	16.4225	16.09	16.33625	16.2875	15.91
8/11/2019 12:46:05	-118.5145584	42.54344252	1237.258581	8/11/19	0.823668981	0.532002315	8/11/19 12:46	12:47:03	17.30625	17.37125	17.29	17.145	17.2725	17.07	16.755	16.8075	16.8675	16.63	16.90125	16.855	16.8275	16.64	16.84875	16.4975	16.60875	16.275	16.4625	16.57375	16.5875	16.3975	16.13625	16.39375	16.25625	16.03625	16.24	16.11625	16.1975	16.19	16.1675	15.74875	15.9	16.18125	15.70375	15.65375	16.11125	15.76125	15.85875	15.865	15.28875
8/11/2019 12:46:06	-118.5145772	42.54344603	1237.272065	8/11/19	0.823680556	0.532013889	8/11/19 12:46	12:47:04	17.69777778	17.59	17.71444444	17.56333333	17.72111111	17.44444444	17.11555556	17.18222222	17.29	16.76111111	17.23555556	17.10888889	17.24	16.88111111	17.12555556	16.79111111	16.97111111	16.67444444	16.77555556	16.92333333	16.86	16.72777778	16.49777778	16.71111111	16.59111111	16.34555556	16.51888889	16.44777778	16.53777778	16.36444444	16.49444444	16.04666667	15.97333333	16.41111111	15.82111111	15.65111111	16.23222222	15.91555556	16.14333333	16.17444444	15.60888889
8/11/2019 12:46:07	-118.5145967	42.54344956	1237.3378	8/11/19	0.82369213	0.532025463	8/11/19 12:46	12:47:05	18.28222222	18.40888889	18.54666667	18.59	18.46111111	18.22	17.88222222	17.95444444	18.03777778	17.71666667	17.91333333	17.88444444	17.92666667	17.70333333	17.78444444	17.59777778	17.57666667	17.33333333	17.59333333	17.61444444	17.56222222	17.33111111	17.16888889	17.47333333	17.27888889	17.04	17.15222222	17.11888889	17.24333333	17.10777778	17.13888889	16.72777778	16.80555556	17.03444444	16.64888889	16.46333333	16.97555556	16.57777778	16.79333333	16.78444444	16.33666667
8/11/2019 12:46:08	-118.5146165	42.54345351	1237.341065	8/11/19	0.823703704	0.532037037	8/11/19 12:46	12:47:06	18.99375	18.985	18.96125	19.07625	18.89875	18.7225	18.48375	18.55125	18.57625	18.23	18.57875	18.4975	18.55125	18.23875	18.46625	18.155	18.2525	17.9725	18.1	18.235	18.13875	17.9675	17.72625	17.98125	17.835	17.64125	17.71625	17.69875	17.7925	17.6825	17.5625	17.345	17.26875	17.5375	17.025	16.9475	17.42875	17.14125	17.4625	17.37	16.82625
8/11/2019 12:46:09	-118.5146369	42.54345736	1237.395032	8/11/19	0.823715278	0.532048611	8/11/19 12:46	12:47:07	19.24875	19.1075	19.115	19.005	19.19375	18.93125	18.50375	18.5775	18.62625	18.28875	18.66375	18.63625	18.56375	18.24625	18.5225	18.20875	18.24125	17.9775	18.09625	18.315	18.18375	18.11125	17.875	18.11875	17.94125	17.655	17.7975	17.835	17.84125	17.7575	17.74625	17.395	17.395	17.6925	17.45625	17.11625	17.6925	17.43625	17.4325	17.26125	16.90375
8/11/2019 12:46:10	-118.5146576	42.5434606	1237.463129	8/11/19	0.823726852	0.532060185	8/11/19 12:46	12:47:08	18.62111111	18.75888889	18.73777778	18.63333333	18.56111111	18.31555556	18.02666667	18.05111111	18.08777778	17.69111111	18.12111111	18.01444444	17.98444444	17.76555556	17.88666667	17.69666667	17.70777778	17.35888889	17.58666667	17.57222222	17.66777778	17.48	17.30555556	17.54333333	17.32222222	17.17555556	17.21555556	17.28222222	17.16333333	17.22111111	17.20777778	16.87888889	16.88666667	17.24111111	16.95555556	16.62888889	17.32222222	16.82555556	16.94666667	16.89777778	16.42888889
8/11/2019 12:46:11	-118.514676	42.5434637	1237.52375	8/11/19	0.823738426	0.532071759	8/11/19 12:46	12:47:09	18.83	18.90625	18.93	18.7775	18.88875	18.6475	18.3475	18.21875	18.325	17.89125	18.32375	18.20125	18.14375	18.04	18.16	17.78125	17.81875	17.60125	17.75375	17.84625	17.83625	17.57375	17.3225	17.6825	17.49125	17.31625	17.3925	17.30875	17.33125	17.36875	17.32125	17.0325	17.04125	17.6375	17.06375	16.9225	17.60625	17.16	17.065	17.3325	16.675
8/11/2019 12:46:12	-118.5146971	42.54346721	1237.576459	8/11/19	0.82375	0.532083333	8/11/19 12:46	12:47:10	20.7575	20.8975	20.93	20.94375	20.81125	20.44875	20.345	20.38375	20.3825	19.9525	20.225	20.21375	20.24	20.04	20.21375	19.9375	19.89875	19.56625	19.77375	19.86375	19.91125	19.5875	19.395	19.6475	19.45875	19.21125	19.34125	19.4025	19.3625	19.30375	19.3625	18.97625	19.04	19.54375	18.90875	18.6975	19.27625	18.7825	19.1725	19.1925	18.6025
8/11/2019 12:46:13	-118.5147208	42.54347138	1237.571355	8/11/19	0.823761574	0.532094907	8/11/19 12:46	12:47:11	22.08888889	22.15777778	22.04666667	21.84333333	21.95	21.74888889	21.32333333	21.47666667	21.50222222	21.14444444	21.40444444	21.40444444	21.31555556	21.10666667	21.26	20.99222222	20.97222222	20.67444444	20.85666667	20.96	20.85666667	20.67	20.46777778	20.70888889	20.60222222	20.33777778	20.38111111	20.43888889	20.40333333	20.44222222	20.30888889	19.96	20.06	20.48444444	20.21222222	19.78333333	20.02222222	19.94	20.08111111	20.13	19.63666667
8/11/2019 12:46:14	-118.514742	42.54347553	1237.586968	8/11/19	0.823773148	0.532106481	8/11/19 12:46	12:47:12	22.39625	22.34625	22.19	22.31	22.225	22.1425	21.84875	21.77625	21.835	21.44375	21.70875	21.62875	21.66125	21.41375	21.50625	21.34125	21.16875	21.015	21.10625	21.26125	21.1825	21.005	20.83125	20.98875	20.875	20.625	20.66625	20.76	20.73625	20.69	20.74625	20.45375	20.31875	20.78125	20.2975	20.21625	20.83125	20.315	20.55125	20.37125	20.09625
8/11/2019 12:46:15	-118.5147624	42.54347976	1237.5466	8/11/19	0.823784722	0.532118056	8/11/19 12:46	12:47:13	22.55125	22.57625	22.59375	22.47875	22.5825	22.30625	22	21.8875	22.055	21.59375	21.84625	21.81625	21.85125	21.59625	21.75625	21.4575	21.42875	21.09125	21.37375	21.32625	21.40875	21.1325	21.055	21.16	20.95625	20.81375	20.85	20.8825	20.89875	20.87	20.805	20.52875	20.61125	20.905	20.72	20.505	20.79375	20.3675	20.4825	20.865	20.02875
8/11/2019 12:46:16	-118.5147826	42.54348414	1237.496839	8/11/19	0.823796296	0.53212963	8/11/19 12:46	12:47:14	22.78666667	22.83444444	22.80555556	22.70444444	22.66222222	22.41222222	22.14111111	22.03	22.06	21.76	22.06	22.07333333	21.96444444	21.70111111	21.83333333	21.57666667	21.60222222	21.39444444	21.54111111	21.48333333	21.59333333	21.35444444	21.09111111	21.39111111	21.29111111	20.93111111	21.10222222	20.90333333	21.15222222	20.99	20.95333333	20.70666667	20.61222222	20.82555556	20.83666667	20.71	21.06111111	20.75555556	20.70666667	20.93	20.32222222
8/11/2019 12:46:17	-118.5148053	42.54348921	1237.541774	8/11/19	0.82380787	0.532141204	8/11/19 12:46	12:47:15	21.90125	22.04125	21.89875	21.86	21.95125	21.66	21.2525	21.31125	21.405	20.9525	21.2825	21.1875	21.2325	20.9475	21.12875	20.92625	20.85	20.62	20.76625	20.73125	20.77375	20.6475	20.345	20.54375	20.45625	20.1925	20.3225	20.25	20.23625	20.22	20.26875	19.96875	19.99125	20.29875	20.27875	19.94625	20.32875	19.87875	20.05875	20.26375	19.55375
8/11/2019 12:46:18	-118.5148291	42.54349396	1237.651903	8/11/19	0.823819444	0.532152778	8/11/19 12:46	12:47:16	20.99	20.79571429	20.63714286	20.75	20.79285714	20.61142857	20.17285714	20.11857143	20.20142857	19.90142857	20.11142857	20.03285714	20.07428571	19.74714286	19.97714286	19.64571429	19.57285714	19.43857143	19.54428571	19.61285714	19.63142857	19.45428571	19.13571429	19.43	19.32571429	19.03142857	19.09285714	19.02714286	19.14	19.17428571	18.98857143	18.75285714	18.79428571	19.38428571	18.98857143	18.80571429	19.08142857	18.90857143	18.94	19.01857143	18.59714286
8/11/2019 12:46:19	-118.5148541	42.54349825	1237.741129	8/11/19	0.823831019	0.532164352	8/11/19 12:46	12:47:17	19.2475	19.26125	19.26625	19.27	19.24875	19.05375	18.6075	18.695	18.7375	18.32375	18.665	18.46375	18.62	18.28625	18.45875	18.22125	18.13375	17.90375	18.03875	18.0625	18.1375	17.88875	17.65	17.88625	17.63625	17.58	17.56875	17.7	17.59375	17.67625	17.66875	17.22	17.4525	17.8025	17.48625	17.375	17.87875	17.39125	17.5225	17.47125	16.9875
8/11/2019 12:46:20	-118.5148788	42.5435028	1237.766	8/11/19	0.823842593	0.532175926	8/11/19 12:46	12:47:18	18.29555556	18.34666667	17.92777778	18.10222222	18.22777778	18.01222222	17.64111111	17.58666667	17.66444444	17.31666667	17.55333333	17.45111111	17.52	17.24777778	17.30333333	17.12	17.11333333	16.83777778	16.96555556	17.02	16.97333333	16.78555556	16.59888889	16.84222222	16.64555556	16.33888889	16.46666667	16.45222222	16.57333333	16.54	16.47333333	16.24666667	16.22666667	16.69	16.50222222	16.44555556	16.72	16.39222222	16.57333333	16.64111111	15.78111111
8/11/2019 12:46:21	-118.5149044	42.54350749	1237.718032	8/11/19	0.823854167	0.5321875	8/11/19 12:46	12:47:19	17.67444444	17.77777778	17.82444444	17.59444444	17.76	17.36444444	17.10222222	16.98444444	17.15222222	16.64777778	16.97111111	16.88555556	16.84111111	16.62555556	16.78777778	16.47222222	16.52888889	16.24888889	16.36888889	16.37	16.42333333	16.15333333	15.93666667	16.23888889	16.01666667	15.76444444	15.83111111	15.92222222	15.98111111	15.95444444	15.89222222	15.59333333	15.7	16.25222222	15.88333333	15.91	16.48	15.81111111	16.11111111	16.11111111	15.27777778
8/11/2019 12:46:22	-118.5149303	42.54351157	1237.721194	8/11/19	0.823865741	0.532199074	8/11/19 12:46	12:47:20	17.02111111	17.19555556	17.06777778	17.00222222	17.11333333	16.93666667	16.43	16.46111111	16.64666667	16.17555556	16.47888889	16.29777778	16.29333333	16.12	16.17444444	16.02555556	16.00888889	15.64555556	15.82333333	15.85222222	15.85444444	15.67666667	15.49333333	15.69333333	15.6	15.36666667	15.4	15.40333333	15.48111111	15.44777778	15.46777778	15.26	15.33333333	15.78111111	15.31555556	15.40444444	15.97888889	15.28333333	15.73222222	15.77666667	15.03
8/11/2019 12:46:23	-118.5149561	42.54351551	1237.751935	8/11/19	0.823877315	0.532210648	8/11/19 12:46	12:47:21	18.755	19.09125	18.86375	18.81375	18.825	18.6425	18.34	18.3	18.3625	17.9375	18.25125	18.1575	18.1525	17.9275	18.11875	17.8775	17.79	17.64375	17.7825	17.755	17.8325	17.54375	17.33125	17.62375	17.46125	17.2175	17.39375	17.2775	17.36875	17.3525	17.40625	16.97625	17.2525	17.6125	17.6325	16.94875	17.53625	17.035	17.28875	17.24625	16.65625
8/11/2019 12:46:24	-118.5149808	42.5435193	1237.8608	8/11/19	0.823888889	0.532222222	8/11/19 12:46	12:47:22	19.94444444	19.82	19.68666667	19.62222222	19.54	19.25777778	18.96888889	18.96444444	19.03888889	18.62111111	19.05111111	18.84222222	18.94666667	18.60333333	18.84111111	18.55111111	18.65222222	18.36333333	18.55666667	18.54666667	18.61888889	18.34666667	18.13666667	18.43555556	18.27777778	17.95555556	18.17222222	18.13222222	18.11888889	18.24777778	18.14	17.81111111	17.80666667	18.23	18.23333333	17.86222222	18.38111111	17.62888889	18.08666667	17.92555556	17.32555556
8/11/2019 12:46:25	-118.514996	42.54351945	1237.941613	8/11/19	0.823900463	0.532233796	8/11/19 12:46	12:47:23	19.11111111	19.06888889	19.00444444	18.82111111	18.71444444	18.41888889	18.11333333	18.06666667	18.16111111	17.73333333	18.09111111	17.90111111	17.97777778	17.67666667	17.82777778	17.77888889	17.67444444	17.41888889	17.57222222	17.68111111	17.68111111	17.43888889	17.31555556	17.55222222	17.3	17.14333333	17.22333333	17.19	17.23	17.23666667	17.27666667	16.89333333	17.06333333	17.65666667	17.37222222	17.25888889	17.59	17.07333333	17.30666667	17.29333333	16.44555556
8/11/2019 12:46:26	-118.515004	42.54350895	1237.992677	8/11/19	0.823912037	0.53224537	8/11/19 12:46	12:47:24	19.17125	19.3125	19.11	18.9925	19	18.785	18.36875	18.48875	18.43125	18.1175	18.4025	18.30625	18.3275	18.06875	18.15375	17.98375	17.9175	17.69	17.91	17.83875	17.92375	17.6125	17.5025	17.7675	17.56625	17.33875	17.405	17.35125	17.43875	17.595	17.53	17.25	17.27125	17.65375	17.59375	17.70125	17.8625	17.58125	17.575	17.61	16.845
8/11/2019 12:46:27	-118.5150107	42.54349285	1238.0764	8/11/19	0.823923611	0.532256944	8/11/19 12:46	12:47:25	17.24375	17.42	17.46625	17.1875	17.325	16.9775	16.845	16.75125	16.93875	16.3525	16.725	16.645	16.6675	16.415	16.61125	16.29125	16.29125	16.09375	16.29875	16.245	16.35625	16.14875	15.8975	16.1	15.97125	15.85625	15.875	15.8825	15.94375	15.92625	15.92	15.58375	15.5425	16.135	15.98625	15.87	16.30875	15.9475	16.125	16.0175	15.17375
8/11/2019 12:46:28	-118.5150149	42.54348084	1238.227	8/11/19	0.823935185	0.532268519	8/11/19 12:46	12:47:26	15.35888889	15.44	15.46222222	15.38666667	15.34333333	15.20444444	14.78666667	14.75	14.96222222	14.53222222	14.81666667	14.79444444	14.77888889	14.42333333	14.66	14.39333333	14.42777778	14.16222222	14.32333333	14.36555556	14.36222222	14.13	13.95666667	14.26888889	14.03222222	13.87444444	13.98777778	13.97555556	14.04888889	14.01444444	14.03222222	13.72888889	13.64222222	14.25333333	14.04444444	13.75777778	14.31444444	13.81555556	13.93666667	14.14111111	13.59
8/11/2019 12:46:29	-118.5150106	42.54347661	1238.141243	8/11/19	0.823946759	0.532280093	8/11/19 12:46	12:47:27	16.35555556	16.47111111	16.28777778	16.15222222	16.23222222	16.13666667	15.78555556	15.58111111	15.74	15.31111111	15.73222222	15.58555556	15.51	15.36222222	15.53222222	15.23444444	15.27333333	14.91777778	15.20888889	15.23888889	15.30888889	14.98	14.82111111	15.09555556	14.97333333	14.66444444	14.79888889	14.67666667	14.90777778	14.81222222	14.82555556	14.52333333	14.58777778	14.93777778	14.61111111	14.61888889	15.21111111	14.69555556	14.92333333	15.18555556	14.45444444
8/11/2019 12:46:30	-118.5149912	42.54347302	1238.000097	8/11/19	0.823958333	0.532291667	8/11/19 12:46	12:47:28	16.8475	16.82125	16.73125	16.74375	16.825	16.54375	16.16625	16.06	16.2875	15.85125	16.0975	15.975	16.08375	15.73125	15.99375	15.71875	15.76125	15.46625	15.65125	15.6975	15.65375	15.4675	15.14375	15.52	15.365	15.0475	15.3	15.22375	15.35125	15.15	15.35625	15.07	15.07375	15.40375	15.09625	15.18	15.76125	15.25875	15.45125	15.4875	14.6875
8/11/2019 12:46:31	-118.5149625	42.54346976	1237.939097	8/11/19	0.823969907	0.532303241	8/11/19 12:46	12:47:29	17.04	17.04875	17.20625	16.96625	17.1775	16.73625	16.49625	16.46875	16.57875	16.18375	16.455	16.42	16.44875	16.14875	16.33625	16.085	16.0175	15.79125	15.97875	15.88	16.0525	15.79875	15.58375	15.9425	15.7675	15.45125	15.6425	15.54	15.65625	15.59625	15.6575	15.3625	15.48	15.90875	15.48875	15.4325	16.04375	15.47625	15.63375	15.69125	14.96375
8/11/2019 12:46:32	-118.5149283	42.54346558	1237.875613	8/11/19	0.823981481	0.532314815	8/11/19 12:46	12:47:30	16.03	16.15444444	16.25888889	16.04888889	16.14	15.87333333	15.51111111	15.39333333	15.75444444	15.22555556	15.53111111	15.40222222	15.43333333	15.23333333	15.34888889	15.08666667	15.17777778	14.86888889	15.01444444	15.01777778	14.97666667	14.80777778	14.58888889	14.87666667	14.79333333	14.53666667	14.72444444	14.63444444	14.68	14.73222222	14.69444444	14.36888889	14.45444444	14.86111111	14.31555556	14.22333333	14.89666667	14.49111111	14.71666667	14.78666667	13.88333333
8/11/2019 12:46:33	-118.5149054	42.54346204	1237.882	8/11/19	0.823993056	0.532326389	8/11/19 12:46	12:47:31	15.36714286	15.25285714	15.23714286	15.11714286	15.25857143	15	14.67714286	14.59857143	14.81	14.30428571	14.65428571	14.46	14.54428571	14.24428571	14.44285714	14.23	14.22	13.88714286	14.11	14.08571429	14.09571429	13.90142857	13.7	14.06142857	13.87571429	13.65285714	13.68285714	13.66142857	13.77857143	13.79714286	13.8	13.44285714	13.48714286	14.11714286	13.75	13.60428571	14.28428571	13.66714286	13.69285714	14.07714286	13.20571429
8/11/2019 12:46:34	-118.5148935	42.54346012	1237.881129	8/11/19	0.82400463	0.532337963	8/11/19 12:46	12:47:32	14.93625	15.19625	14.94375	14.97875	15.1775	14.80875	14.4325	14.3725	14.6125	14.1475	14.43375	14.3525	14.365	14.1175	14.25375	14.01625	14.00875	13.755	13.9375	13.87125	13.97875	13.735	13.59875	13.80875	13.7975	13.415	13.595	13.57375	13.73375	13.59375	13.55	13.31	13.29875	13.6125	13.59625	13.4125	13.93875	13.515	13.815	13.92375	12.98875
8/11/2019 12:46:35	-118.5148831	42.54345966	1237.829161	8/11/19	0.824016204	0.532349537	8/11/19 12:46	12:47:33	15.62666667	15.55	15.58666667	15.53	15.50666667	15.37222222	14.87222222	14.96444444	15.09777778	14.75111111	15.06777778	14.81888889	14.76666667	14.67	14.79444444	14.56444444	14.53666667	14.24555556	14.41	14.42777778	14.58111111	14.29111111	14.14333333	14.31333333	14.16	13.96444444	14.12555556	13.99333333	14.12777778	14.01555556	14.04777778	13.74444444	13.87444444	14.25222222	14.15777778	13.86444444	14.52666667	13.97333333	14.13666667	14.25777778	13.61111111
8/11/2019 12:46:36	-118.5148749	42.54345934	1237.826548	8/11/19	0.824027778	0.532361111	8/11/19 12:46	12:47:34	15.5275	15.72875	15.67125	15.52125	15.6225	15.40875	15.0325	14.9825	15.02125	14.73125	15.085	14.8725	14.81	14.6275	14.82875	14.53	14.5325	14.33125	14.51875	14.5	14.5525	14.34625	14.11125	14.43	14.19375	14.005	14.005	14.075	14.1325	14.0425	14.11875	13.91	13.66	14.5	14.0875	13.98	14.60375	14.03	14.1	14.4325	13.48125
8/11/2019 12:46:37	-118.5148686	42.54345869	1237.860097	8/11/19	0.824039352	0.532372685	8/11/19 12:46	12:47:35	15.60857143	15.64285714	15.63857143	15.46714286	15.43142857	15.45	14.98714286	14.94714286	15.04	14.77285714	15	14.83571429	14.87857143	14.64714286	14.75571429	14.48	14.49285714	14.23	14.48	14.52857143	14.49142857	14.26285714	13.99285714	14.29285714	14.17428571	13.81	14.03	13.87428571	14.10428571	14.16857143	14.05428571	13.73571429	13.94285714	14.41714286	13.98285714	13.98857143	14.33428571	14.00714286	14.23285714	14.50857143	13.44428571
8/11/2019 12:46:38	-118.5148608	42.54345782	1237.7708	8/11/19	0.824050926	0.532384259	8/11/19 12:46	12:47:36	15.52125	15.6575	15.725	15.53125	15.63	15.38875	14.94	14.89	15.14625	14.8325	15	14.92	14.92875	14.59125	14.80625	14.6725	14.55875	14.31375	14.52	14.56625	14.5675	14.34375	14.09	14.39875	14.2025	14.05625	14.14375	14.0175	14.0725	14.19625	14.1	13.97	14.00125	14.4775	14.26375	13.89625	14.54125	14.02625	14.22	14.19375	13.72125
8/11/2019 12:46:39	-118.51485	42.54345688	1237.852613	8/11/19	0.8240625	0.532395833	8/11/19 12:46	12:47:37	15.90444444	15.89	15.87666667	15.85555556	15.92555556	15.72	15.35222222	15.23555556	15.33555556	15.03777778	15.34222222	15.21	15.17333333	14.96777778	15.03555556	14.87555556	14.9	14.57111111	14.82444444	14.80555556	14.86444444	14.63111111	14.42666667	14.71444444	14.55555556	14.29555556	14.49666667	14.29111111	14.52333333	14.46333333	14.43777778	14.14222222	14.25666667	14.57	14.42888889	14.24555556	14.59888889	14.38	14.51	14.51555556	13.78888889
8/11/2019 12:46:40	-118.5148368	42.54345494	1237.942968	8/11/19	0.824074074	0.532407407	8/11/19 12:46	12:47:38	16.0225	15.96125	15.9575	15.83625	16.03	15.69125	15.28	15.19125	15.36125	15.0775	15.31875	15.15375	15.19	14.9525	15.1025	14.90125	14.93875	14.64125	14.81125	14.865	14.83875	14.61875	14.48375	14.66625	14.54375	14.41625	14.41125	14.365	14.40625	14.4275	14.46	14.05375	14.2675	14.60875	14.41	14.11125	14.84	14.1625	14.475	14.43375	13.90375
8/11/2019 12:46:41	-118.5148205	42.54345321	1237.89929	8/11/19	0.824085648	0.532418981	8/11/19 12:46	12:47:39	16.75111111	16.88222222	16.73222222	16.67222222	16.81888889	16.41333333	16.23444444	16.09555556	16.20888889	15.80888889	16.12666667	16.06777778	16.06333333	15.83666667	15.93777778	15.71777778	15.66444444	15.42444444	15.57333333	15.67333333	15.69444444	15.48555556	15.24222222	15.51	15.34333333	15.11111111	15.36	15.19	15.31777778	15.24666667	15.33777778	15.05888889	14.98	15.29777778	15.25666667	15.17333333	15.49222222	15.16555556	15.38555556	15.51666667	14.73555556
8/11/2019 12:46:42	-118.5148025	42.54345196	1237.7962	8/11/19	0.824097222	0.532430556	8/11/19 12:46	12:47:40	17.56777778	17.76111111	17.62333333	17.61555556	17.49444444	17.43333333	17.05333333	16.96	17.13	16.72444444	17.03111111	16.89	16.91111111	16.63333333	16.82666667	16.59444444	16.58111111	16.28333333	16.48111111	16.49	16.56333333	16.31222222	16.18666667	16.43444444	16.22555556	16.05777778	16.17555556	16.06111111	16.18	16.17888889	16.26888889	15.84111111	15.86777778	16.38333333	15.98888889	16.12444444	16.31	16.07444444	16.16333333	16.53777778	15.55444444
8/11/2019 12:46:43	-118.5147837	42.54345009	1237.701355	8/11/19	0.824108796	0.53244213	8/11/19 12:46	12:47:41	17.50375	17.68375	17.49125	17.47	17.61625	17.3075	16.825	16.76375	16.9425	16.53375	16.88625	16.72125	16.64125	16.50875	16.62625	16.46625	16.53875	16.05625	16.46	16.3875	16.46875	16.155	16.03625	16.2975	16.125	15.84625	15.98125	15.955	15.88375	16.01125	16.10625	15.7775	15.8325	16.25125	15.46875	15.80375	15.9625	15.985	16.0725	16.01	15.355
8/11/2019 12:46:44	-118.5147624	42.54344764	1237.619645	8/11/19	0.82412037	0.532453704	8/11/19 12:46	12:47:42	16.86125	17.01625	16.9325	17.0125	16.94625	16.745	16.36125	16.25875	16.42125	16.05875	16.3175	16.32875	16.28875	16.11	16.18125	16.02	15.99875	15.665	15.8475	15.83375	16.01875	15.72125	15.4975	15.7175	15.535	15.39875	15.52375	15.49625	15.49875	15.55375	15.61	15.21375	15.3	15.70625	15.49875	15.25625	15.87375	15.4175	15.47375	15.69625	15.00625
8/11/2019 12:46:45	-118.5147394	42.54344486	1237.557387	8/11/19	0.824131944	0.532465278	8/11/19 12:46	12:47:43	16.78375	17.03625	16.86875	16.93	16.9225	16.58375	16.30125	16.24125	16.4425	16.00625	16.39	16.255	16.32625	16.0575	16.30125	15.9975	16.05875	15.66375	15.8925	15.80875	16.0125	15.67	15.51875	15.7425	15.71125	15.38375	15.50625	15.52125	15.59	15.5075	15.475	15.18875	15.22125	15.78375	15.36125	15.275	15.79375	15.35125	15.345	15.58125	14.70125
8/11/2019 12:46:46	-118.5147144	42.54344219	1237.499774	8/11/19	0.824143519	0.532476852	8/11/19 12:46	12:47:44	17.78777778	17.95	17.80555556	17.69666667	17.87333333	17.61777778	17.09444444	17.20666667	17.43222222	16.97111111	17.30333333	17.18111111	17.08444444	16.84666667	17.06777778	16.87777778	16.84777778	16.48888889	16.78555556	16.72222222	16.83555556	16.57555556	16.36444444	16.64777778	16.54555556	16.33666667	16.41333333	16.37111111	16.44888889	16.43111111	16.35222222	16.03111111	16.11555556	16.36888889	16.25555556	16.19888889	16.45111111	16.25111111	16.35222222	16.29666667	15.57666667
8/11/2019 12:46:47	-118.5146882	42.54343934	1237.433	8/11/19	0.824155093	0.532488426	8/11/19 12:46	12:47:45	18.9375	19.155	19.285	19.15125	18.96375	18.91125	18.52625	18.39625	18.50875	18.19	18.4525	18.3975	18.33	18.19	18.19625	18.0575	17.99	17.8075	17.985	17.97375	18.065	17.76125	17.625	17.8725	17.67	17.47375	17.51	17.5275	17.6225	17.57	17.6775	17.40875	17.28	17.68375	17.31	17.09875	17.6325	17.37	17.5075	17.51375	16.9825
8/11/2019 12:46:48	-118.514662	42.54343634	1237.386032	8/11/19	0.824166667	0.5325	8/11/19 12:46	12:47:46	17.75625	18.09	17.915	17.73625	17.77375	17.6525	17.17375	17.15625	17.43375	16.935	17.30875	17.1525	17.23125	16.94125	17.09125	16.795	16.91375	16.55625	16.805	16.70875	16.84125	16.55375	16.42375	16.7025	16.61375	16.4025	16.4825	16.34875	16.4775	16.5075	16.49625	16.225	16.195	16.8975	16.29125	16.0575	16.77625	16.17625	16.32	16.5975	15.7525
8/11/2019 12:46:49	-118.5146362	42.54343406	1237.381	8/11/19	0.824178241	0.532511574	8/11/19 12:46	12:47:47	17.41571429	17.61571429	17.32428571	17.50571429	17.58857143	17.28857143	16.92285714	16.78714286	17.02	16.54	16.97714286	16.76428571	16.79571429	16.59857143	16.73428571	16.53142857	16.51428571	16.24285714	16.53142857	16.47571429	16.48857143	16.25	16.05857143	16.37142857	16.15142857	16.15285714	16.10714286	16.05714286	16.23	16.15714286	16.25285714	15.91285714	15.87714286	16.37571429	15.98857143	16.02	16.46714286	15.79285714	16.10142857	16.04714286	15.47
8/11/2019 12:46:50	-118.5146114	42.54343176	1237.415226	8/11/19	0.824189815	0.532523148	8/11/19 12:46	12:47:48	18.21888889	18.24	18.35666667	18.19333333	18.36444444	18.05777778	17.61222222	17.66555556	17.86777778	17.43888889	17.83444444	17.60888889	17.62333333	17.45222222	17.54222222	17.31111111	17.32666667	17.07888889	17.32333333	17.23	17.28	17.08	16.89555556	17.23	16.94333333	16.84888889	16.93444444	16.81888889	16.87666667	16.87333333	16.82444444	16.59333333	16.64333333	17.13111111	16.31666667	16.38111111	16.99222222	16.60111111	16.76	16.70555556	16.05222222
8/11/2019 12:46:51	-118.5145875	42.54342944	1237.3704	8/11/19	0.824201389	0.532534722	8/11/19 12:46	12:47:49	18.13333333	18.39166667	18.225	18.425	18.36833333	18.17333333	17.6	17.62333333	17.91166667	17.49833333	17.7	17.69666667	17.65333333	17.49	17.63	17.32166667	17.46166667	17.11333333	17.35	17.30666667	17.44	17.15	17.00666667	17.29333333	17.09166667	16.85666667	16.95	16.87666667	16.90833333	17.04333333	17.07333333	16.87	16.72833333	16.86333333	16.50833333	16.18	16.84333333	16.615	16.81	16.87	16.255
8/11/2019 12:46:52	-118.5145637	42.54342748	1237.299742	8/11/19	0.824212963	0.532546296	8/11/19 12:46	12:47:50	17.18	17.28625	17.26375	17.225	17.225	16.9975	16.70125	16.7225	16.86375	16.58	16.87375	16.74875	16.81125	16.52875	16.63625	16.51	16.55625	16.1675	16.41625	16.4425	16.5075	16.15375	16.05875	16.30625	16.215	15.99	16.1175	15.9725	16.065	16.1675	16.1325	15.79625	15.6675	16.205	15.59625	15.80375	15.9275	15.67625	15.85875	15.7775	15.27875
8/11/2019 12:46:53	-118.5145429	42.54342581	1237.25872	8/11/19	0.824224537	0.53255787	8/11/19 12:46	12:47:51	17.45333333	17.63222222	17.62888889	17.70222222	17.58333333	17.48777778	17.05888889	17.12777778	17.31222222	16.96	17.26	17.17555556	17.23666667	16.92111111	17.13444444	16.98666667	16.97	16.63666667	16.90777778	16.82444444	16.91444444	16.60666667	16.53333333	16.76333333	16.56666667	16.41111111	16.62111111	16.45111111	16.51666667	16.63888889	16.47222222	16.22111111	16.20666667	16.51444444	15.77888889	15.88555556	16.31555556	16.15777778	16.13666667	16.42222222	15.81777778
8/11/2019 12:46:54	-118.5145204	42.54342384	1237.232595	8/11/19	0.824236111	0.532569444	8/11/19 12:46	12:47:52	19.9675	19.88	20.145	19.98625	20.21125	19.9975	19.7075	19.61125	19.7525	19.41	19.76375	19.71	19.72125	19.55625	19.595	19.41375	19.4625	19.13625	19.41625	19.3125	19.45375	19.29375	19.00875	19.3525	19.20125	18.9525	19.10375	19.065	19.06125	19.05	19.125	18.78125	18.7025	18.89	18.21	18.27	18.6225	18.83625	18.715	18.90875	18.3425
8/11/2019 12:46:55	-118.5144959	42.54342144	1237.265	8/11/19	0.824247685	0.532581019	8/11/19 12:46	12:47:53	22.09555556	22.28333333	22.28555556	22.15333333	22.30555556	22.04111111	21.81	21.69222222	21.98	21.59222222	21.91666667	21.81111111	21.83555556	21.67333333	21.78555556	21.63888889	21.75111111	21.38888889	21.58666667	21.60444444	21.7	21.48555556	21.21333333	21.51555556	21.38555556	21.16777778	21.40888889	21.18111111	21.36444444	21.40222222	21.46444444	21.11888889	20.99	21.31	20.43777778	20.7	20.98777778	20.68888889	20.91666667	21.27222222	20.54555556
8/11/2019 12:46:56	-118.5144738	42.54341875	1237.32829	8/11/19	0.824259259	0.532592593	8/11/19 12:46	12:47:54	22.38	22.74	22.67222222	22.53222222	22.74222222	22.49222222	22.22555556	22.09222222	22.36111111	21.99666667	22.41777778	22.26333333	22.27444444	22.05222222	22.25111111	22.07666667	22.08444444	21.77333333	22.03666667	22.01555556	22.06333333	21.82333333	21.68	21.95555556	21.81555556	21.59444444	21.79111111	21.65222222	21.76	21.80777778	21.76555556	21.51333333	21.35777778	21.59333333	20.9	21.15555556	21.29666667	21.29444444	21.46333333	21.49888889	21
8/11/2019 12:46:57	-118.5144526	42.54341644	1237.268387	8/11/19	0.824270833	0.532604167	8/11/19 12:46	12:47:55	23.755	24.075	23.96625	24.115	24.0675	23.73375	23.37875	23.51625	23.6975	23.3525	23.62125	23.555	23.475	23.42375	23.38375	23.41	23.42375	23.035	23.34625	23.22125	23.4075	23.16875	22.94125	23.29375	23.0575	22.93125	23.07375	22.9675	22.96125	23.1525	23.0475	22.77125	22.5575	22.8125	22.29625	22.44	22.45625	22.82875	22.64	22.8575	22.6575
8/11/2019 12:46:58	-118.5144316	42.54341459	1237.190613	8/11/19	0.824282407	0.532615741	8/11/19 12:46	12:47:56	24.50625	24.8575	24.6075	24.65875	24.7325	24.5325	24.10875	24.1425	24.37625	24.005	24.29625	24.29375	24.2325	24.02875	24.2075	24.04625	24.0325	23.715	24.085	23.94625	24.1725	23.86625	23.69	24.07875	23.79125	23.62125	23.80625	23.73625	23.90375	23.84375	23.955	23.63	23.48375	23.475	23.03125	23.2225	23.54375	23.2525	23.495	23.7875	23.355
8/11/2019 12:46:59	-118.5144099	42.54341222	1237.205516	8/11/19	0.824293981	0.532627315	8/11/19 12:46	12:47:57	19.53	19.86125	19.73375	19.7875	19.7425	19.56875	19.2175	19.25875	19.43375	19.2325	19.51	19.37875	19.265	19.1925	19.3925	19.18375	19.23	18.98875	19.15125	19.1125	19.215	19.03125	18.91125	19.0625	18.98125	18.79	18.9675	18.75375	18.99625	19.04	18.99875	18.85375	18.74	19.025	18.605	18.33625	18.70375	18.5175	18.84375	19.1475	18.2625
8/11/2019 12:47:00	-118.514389	42.54340987	1237.195258	8/11/19	0.824305556	0.532638889	8/11/19 12:47	12:47:58	18.44	18.62555556	18.63888889	18.60111111	18.54444444	18.42666667	18.08444444	18.03333333	18.24888889	17.86111111	18.15	18.05888889	18.10111111	17.94	18.06222222	17.80444444	17.87777778	17.51888889	17.95	17.84333333	18.02	17.73222222	17.61111111	17.87555556	17.72444444	17.55777778	17.64555556	17.54111111	17.78111111	17.82222222	17.80777778	17.52666667	17.41555556	17.65666667	17.17111111	17.48222222	17.71444444	17.50444444	17.46666667	17.88666667	17.17222222
8/11/2019 12:47:01	-118.5143794	42.5434075	1237.1134	8/11/19	0.82431713	0.532650463	8/11/19 12:47	12:47:59	17.6525	17.775	17.9125	17.94875	17.8875	17.64625	17.305	17.37625	17.55	17.12875	17.52125	17.295	17.33125	17.1025	17.1775	17.16	17.19625	16.79	17.12875	17.04	17.12	16.8975	16.71375	17.04	16.87	16.65375	16.82875	16.70125	16.8325	16.965	16.87625	16.5725	16.56625	16.945	16.2125	16.205	16.65125	16.54625	16.70125	16.80125	15.99875
8/11/2019 12:47:02	-118.5143785	42.54339774	1237.089226	8/11/19	0.824328704	0.532662037	8/11/19 12:47	12:48:00	17.22857143	17.33142857	17.45	17.53142857	17.41571429	17.26857143	16.91285714	16.95428571	17.16428571	16.74142857	17.08142857	16.87714286	16.95714286	16.70571429	16.83857143	16.76	16.75714286	16.44142857	16.77857143	16.69857143	16.83857143	16.50857143	16.41	16.63285714	16.67	16.25142857	16.46285714	16.33857143	16.53428571	16.59857143	16.49714286	16.27857143	16.15714286	16.54571429	15.89857143	15.96714286	16.26428571	16.32142857	16.65	16.52857143	15.68285714
8/11/2019 12:47:03	-118.5143803	42.5433831	1237.135903	8/11/19	0.824340278	0.532673611	8/11/19 12:47	12:48:01	18.1525	18.53	18.37	18.5025	18.5	18.25625	17.80625	17.79875	18.115	17.81125	18.07625	17.87625	17.93625	17.70125	17.9275	17.7225	17.77625	17.43	17.78125	17.67	17.84375	17.56875	17.40875	17.68	17.47875	17.3375	17.5325	17.38875	17.46875	17.56	17.555	17.205	17.2075	17.5125	17.085	16.66875	17.4025	17.24375	17.17625	17.61625	16.69125
8/11/2019 12:47:04	-118.5143839	42.54337756	1237.161839	8/11/19	0.824351852	0.532685185	8/11/19 12:47	12:48:02	16.79125	17.04375	16.9275	16.9975	17.02625	16.8275	16.45375	16.445	16.75875	16.2975	16.65625	16.47375	16.51875	16.295	16.5	16.32875	16.3475	15.95	16.33125	16.2225	16.30375	16.10375	15.87375	16.27375	16.005	15.89	16.07375	15.95375	16.1025	16.11	16.08375	15.97	15.74375	16.3375	15.81125	15.5625	15.88375	15.9	15.73125	15.9575	15.37375
8/11/2019 12:47:05	-118.51439	42.54337538	1237.1758	8/11/19	0.824363426	0.532696759	8/11/19 12:47	12:48:03	17.28444444	17.47555556	17.43555556	17.34888889	17.41	17.23333333	16.91333333	16.79	17.09	16.73888889	17.06111111	16.89666667	16.87333333	16.77666667	16.87111111	16.78444444	16.82222222	16.53111111	16.72444444	16.65111111	16.79222222	16.59555556	16.41666667	16.66333333	16.50777778	16.29555556	16.45666667	16.40888889	16.53444444	16.59111111	16.62	16.36111111	16.16444444	16.61666667	16.18	15.88444444	16.42666667	16.23333333	16.41777778	16.70555556	15.90777778
8/11/2019 12:47:06	-118.514396	42.54336337	1237.161903	8/11/19	0.824375	0.532708333	8/11/19 12:47	12:48:04	18.14625	18.495	18.44375	18.47	18.415	18.23625	18.0225	17.8975	18.16125	17.69375	18.155	17.96375	17.9675	17.8175	17.85875	17.7725	17.7975	17.48875	17.81125	17.64125	17.7425	17.48375	17.42625	17.73375	17.56375	17.34625	17.63375	17.45	17.49375	17.66375	17.655	17.25	17.3025	17.67375	17.1925	16.9875	17.6425	17.30375	17.5375	17.47875	17.07125
8/11/2019 12:47:07	-118.5144016	42.54334725	1237.302613	8/11/19	0.824386574	0.532719907	8/11/19 12:47	12:48:05	14.92125	15.2225	15.4125	15.13	15.32375	14.935	14.50625	14.545	14.87375	14.47375	14.84875	14.65125	14.6375	14.42125	14.6725	14.47125	14.37375	14.09875	14.41625	14.29375	14.45875	14.17125	14.03125	14.32	14.1925	14.0075	14.06375	13.9475	14.14375	14.245	14.1075	13.81375	13.79875	14.3925	13.72375	13.65375	14.07	13.945	14.04	14.295	13.325
8/11/2019 12:47:08	-118.5144083	42.54334216	1237.309258	8/11/19	0.824398148	0.532731481	8/11/19 12:47	12:48:06	15.23888889	15.59666667	15.57111111	15.46666667	15.44777778	15.24888889	14.75	14.79222222	15.10333333	14.67444444	14.96444444	14.84222222	14.87333333	14.60666667	14.74555556	14.64111111	14.66555556	14.29333333	14.57777778	14.54777778	14.63888889	14.37	14.23666667	14.49222222	14.38	14.13222222	14.29444444	14.18	14.34777778	14.34111111	14.30111111	14.08444444	13.97555556	14.23111111	13.79111111	14.06555556	14.49444444	14.02111111	14.11666667	14.54777778	13.55222222
8/11/2019 12:47:09	-118.5144205	42.54334023	1237.246033	8/11/19	0.824409722	0.532743056	8/11/19 12:47	12:48:07	15.14	15.36625	15.27625	15.32875	15.3075	14.9975	14.58625	14.545	14.87125	14.4525	14.83125	14.67875	14.6575	14.42875	14.4825	14.46125	14.46375	14.11	14.30375	14.39375	14.4325	14.1675	13.94	14.28375	14.0925	13.84875	13.9975	13.91875	14.1025	14.10875	14.05	13.75375	13.72125	14.12	13.8525	13.51375	14.21375	13.64625	13.98	14.19375	13.4625
8/11/2019 12:47:10	-118.5144362	42.5433391	1237.272161	8/11/19	0.824421296	0.53275463	8/11/19 12:47	12:48:08	14.83	14.975	15.14625	15.10625	15.045	14.78625	14.4075	14.34125	14.57375	14.26625	14.55	14.5275	14.37375	14.3425	14.365	14.16875	14.23	13.87375	14.20125	14.08125	14.21375	13.995	13.68	14.0475	13.89375	13.69875	13.8225	13.69	13.82625	13.885	13.99	13.54625	13.44125	14.1025	13.3125	13.2075	13.85	13.37	13.7325	13.96125	13.01625
8/11/2019 12:47:11	-118.5144528	42.54333779	1237.360774	8/11/19	0.82443287	0.532766204	8/11/19 12:47	12:48:09	15.37111111	15.56888889	15.47222222	15.46111111	15.62777778	15.28888889	14.82888889	14.78666667	15.11111111	14.77444444	15.06333333	14.86333333	14.84333333	14.80333333	14.79666667	14.68	14.70777778	14.37111111	14.71333333	14.59666667	14.70777778	14.44777778	14.22888889	14.62	14.39444444	14.17777778	14.35111111	14.22666667	14.33444444	14.40444444	14.48555556	14.11	14.09444444	14.55	13.87888889	13.94111111	14.40888889	14.06111111	14.28444444	14.55444444	13.72444444
8/11/2019 12:47:12	-118.5144703	42.54333679	1237.460774	8/11/19	0.824444444	0.532777778	8/11/19 12:47	12:48:10	16	16.125	16.16375	15.96125	16.13	15.8	15.4	15.385	15.675	15.26625	15.65375	15.4525	15.46875	15.28375	15.49625	15.2075	15.34625	14.96625	15.23	15.17125	15.215	15.0225	14.9925	15.19	15.04	14.81875	15.09375	14.82125	15.0125	14.96625	15.12125	14.855	14.8025	15.3475	15.00625	14.6575	15.24625	14.80875	15.15125	15.3775	14.3375
8/11/2019 12:47:13	-118.5144862	42.54333638	1237.63225	8/11/19	0.824456019	0.532789352	8/11/19 12:47	12:48:11	19.29	19.6675	19.5275	19.62625	19.65375	19.3925	19.0475	19.04125	19.2325	18.80625	19.34625	19.09	19.15625	19.04625	19.12	18.95125	19.00875	18.6325	18.9025	18.8125	19.005	18.6975	18.585	18.86	18.74875	18.58375	18.68375	18.58875	18.61625	18.76875	18.6675	18.5775	18.42875	18.83625	18.3275	18.20625	18.7175	18.38625	18.4675	18.95375	17.98125
8/11/2019 12:47:14	-118.5145047	42.54333691	1237.704811	8/11/19	0.824467593	0.532800926	8/11/19 12:47	12:48:12	22.32111111	22.64	22.52666667	22.59666667	22.76111111	22.48888889	22.06666667	22.11	22.32666667	21.93777778	22.31888889	22.10444444	22.14	21.96	22.14333333	21.99444444	22.00222222	21.64111111	21.95444444	21.80666667	21.96333333	21.71111111	21.52666667	21.84	21.66333333	21.43777778	21.62666667	21.51777778	21.68444444	21.59888889	21.64	21.35888889	21.22444444	21.39777778	20.91444444	20.80777778	20.96555556	21.05444444	21.25	21.61555556	20.99222222
8/11/2019 12:47:15	-118.5145248	42.54333741	1237.715387	8/11/19	0.824479167	0.5328125	8/11/19 12:47	12:48:13	21.8025	22.0275	21.95	21.89375	22.11875	21.86	21.4425	21.43375	21.79625	21.37625	21.69625	21.57	21.49875	21.4225	21.57625	21.40125	21.46125	21.1375	21.39625	21.33375	21.3075	21.0575	21.005	21.2625	21.1275	20.88	20.9625	20.86	20.95125	21.09375	21.10375	20.72	20.7275	20.8975	20.18125	20.18875	20.65375	20.5975	20.73125	21.075	20.34375
8/11/2019 12:47:16	-118.5145429	42.54333925	1237.750968	8/11/19	0.824490741	0.532824074	8/11/19 12:47	12:48:14	18.59555556	18.93444444	18.82333333	18.90444444	18.96333333	18.82	18.29888889	18.39111111	18.69777778	18.27111111	18.63555556	18.52777778	18.46888889	18.29111111	18.48333333	18.29111111	18.40444444	18.08222222	18.35222222	18.19	18.40555556	18.08777778	17.87888889	18.25222222	18.08555556	17.89666667	17.91555556	17.88555556	17.98	18.04111111	18.00222222	17.73555556	17.44666667	17.88666667	17.34555556	17.25	17.73111111	17.6	17.44666667	17.92555556	17.15222222
8/11/2019 12:47:17	-118.5145606	42.54334062	1237.826677	8/11/19	0.824502315	0.532835648	8/11/19 12:47	12:48:15	17.74857143	18.08142857	17.85	17.91714286	18.06571429	17.83	17.44857143	17.29142857	17.68142857	17.35428571	17.65	17.52428571	17.56285714	17.40714286	17.44714286	17.29714286	17.37	17.07142857	17.36714286	17.22428571	17.34714286	17.12	16.92	17.25	17.01857143	16.87142857	16.98857143	16.95571429	16.98142857	17.11428571	17.04857143	16.66428571	16.42714286	16.62428571	16.26857143	16.45428571	16.66857143	16.36	16.82285714	17.05285714	16.13142857
8/11/2019 12:47:18	-118.5145785	42.54334238	1238.013	8/11/19	0.824513889	0.532847222	8/11/19 12:47	12:48:16	17.3	17.71875	17.6275	17.72875	17.7425	17.50625	17.09875	17.03	17.30875	16.9375	17.32	17.1775	17.205	16.995	17.13625	17.0025	17.08625	16.75875	17.1075	16.865	17.01625	16.7875	16.61	16.97625	16.73875	16.4725	16.5975	16.5325	16.58125	16.6375	16.73625	16.3525	16.24125	16.5	15.9375	16.07375	16.40625	16.07	16.125	16.63375	15.67
8/11/2019 12:47:19	-118.514597	42.54334499	1237.981677	8/11/19	0.824525463	0.532858796	8/11/19 12:47	12:48:17	16.65777778	16.85444444	16.91333333	16.85111111	16.96888889	16.75444444	16.38444444	16.39555556	16.69777778	16.25	16.72	16.36888889	16.44333333	16.31555556	16.30111111	16.18222222	16.31555556	15.89888889	16.23444444	16.12	16.21888889	15.99111111	15.80777778	16.11444444	15.97222222	15.73555556	15.94666667	15.77333333	15.90777778	15.89777778	15.89	15.56	15.47333333	15.97555556	15.09	15.40444444	15.48555556	15.65111111	15.31111111	15.75333333	15.07888889
8/11/2019 12:47:20	-118.514616	42.54334692	1237.927548	8/11/19	0.824537037	0.53287037	8/11/19 12:47	12:48:18	16.19	16.43	16.40142857	16.29428571	16.49571429	16.33571429	15.83571429	15.86142857	16.12142857	15.75	16.08857143	15.93857143	15.88857143	15.87142857	15.90857143	15.76142857	15.79571429	15.42428571	15.67857143	15.64428571	15.68428571	15.49857143	15.25142857	15.55142857	15.33714286	15.03142857	15.29428571	15.04714286	15.19428571	15.39285714	15.16857143	14.86857143	14.86714286	15.03285714	14.74571429	14.43285714	15.04428571	14.97142857	14.88428571	15.12428571	14.43142857
8/11/2019 12:47:21	-118.5146351	42.54334966	1237.847323	8/11/19	0.824548611	0.532881944	8/11/19 12:47	12:48:19	15.84666667	16.19333333	16.27	16.18111111	16.28444444	15.99444444	15.55111111	15.56333333	15.86555556	15.37888889	15.73444444	15.61777778	15.62444444	15.46222222	15.52777778	15.31444444	15.47555556	15.11222222	15.40555556	15.16	15.34111111	15.11777778	14.97444444	15.27333333	15.04444444	14.83333333	14.93444444	14.82555556	15.00111111	15.04666667	14.93111111	14.73444444	14.56111111	15.04	14.31555556	14.47	14.88	14.57888889	14.53666667	14.93444444	14.14777778
8/11/2019 12:47:22	-118.5146529	42.5433541	1237.7658	8/11/19	0.824560185	0.532893519	8/11/19 12:47	12:48:20	16.07333333	16.21111111	16.32222222	16.18666667	16.22444444	16.08666667	15.71888889	15.59777778	15.91333333	15.52888889	15.84555556	15.71666667	15.69333333	15.46	15.64777778	15.53777778	15.52333333	15.14555556	15.50111111	15.29555556	15.53	15.17777778	15.02777778	15.25666667	15.12333333	14.97333333	15.13222222	14.97777778	15.03333333	15.10777778	15.05222222	14.87111111	14.67555556	15.19333333	14.37666667	14.72	15.08444444	14.66	14.62333333	15.09777778	14.30666667
8/11/2019 12:47:23	-118.5146678	42.54336028	1237.690032	8/11/19	0.824571759	0.532905093	8/11/19 12:47	12:48:21	16.00125	16.375	16.32125	16.4075	16.375	16.13	15.53	15.61625	15.91125	15.55125	15.9	15.7875	15.6825	15.5575	15.71	15.445	15.50625	15.14375	15.37125	15.2475	15.45875	15.09625	14.915	15.3125	15.135	14.875	15.0075	14.865	14.9775	15.0575	15.13875	14.675	14.5275	15.1925	14.4675	14.48375	14.90375	14.74375	14.76	15.1325	14.1925
8/11/2019 12:47:24	-118.514679	42.54336681	1237.67912	8/11/19	0.824583333	0.532916667	8/11/19 12:47	12:48:22	16.45571429	16.66	16.73	16.58428571	16.74285714	16.38571429	15.98571429	15.90571429	16.18857143	15.81	16.2	16.03857143	15.88142857	15.79857143	15.87714286	15.88857143	15.86142857	15.46428571	15.69857143	15.55285714	15.74285714	15.41142857	15.29571429	15.52857143	15.39714286	15.14857143	15.35571429	15.31142857	15.33142857	15.39714286	15.46	15.03285714	14.86142857	15.51428571	14.71142857	14.78714286	15.08428571	14.85285714	14.97	15.36428571	14.46428571
8/11/2019 12:47:25	-118.5146877	42.54337459	1237.670871	8/11/19	0.824594907	0.532928241	8/11/19 12:47	12:48:23	16.395	16.62375	16.67875	16.5925	16.65625	16.54875	16.13	16.0525	16.35875	16.02375	16.355	16.09125	16.085	15.95625	16.06875	15.90875	16.01	15.53125	15.88	15.86	15.9375	15.67625	15.51625	15.7125	15.68375	15.365	15.4675	15.32875	15.5275	15.555	15.52875	15.1825	15.03875	15.41	14.8325	14.73375	15.0525	15.16625	15.1425	15.49375	14.68125
8/11/2019 12:47:26	-118.5146925	42.54338465	1237.582	8/11/19	0.824606481	0.532939815	8/11/19 12:47	12:48:24	16.53666667	16.65333333	16.75666667	16.92555556	16.82333333	16.74	16.11888889	16.18222222	16.50333333	16.06	16.44888889	16.19777778	16.21	16.01222222	16.16666667	16.02444444	16.08333333	15.68555556	16.04666667	15.82111111	15.98888889	15.68	15.49444444	15.83444444	15.63222222	15.32111111	15.53888889	15.48444444	15.51777778	15.60555556	15.52222222	15.27444444	15.06111111	15.45555556	14.83222222	15.05777778	15.35222222	15.10111111	15.15	15.43222222	14.55555556
8/11/2019 12:47:27	-118.5146939	42.54339563	1237.521323	8/11/19	0.824618056	0.532951389	8/11/19 12:47	12:48:25	16.6025	16.81625	16.71875	16.79875	16.89875	16.71	16.1925	16.145	16.4525	16.085	16.44	16.24125	16.26875	16.03625	16.125	15.9675	15.94125	15.70125	15.9475	15.815	16.08375	15.61875	15.41625	15.79625	15.55875	15.43125	15.565	15.4125	15.49	15.62	15.59	15.2225	14.9775	15.32625	14.9	14.91	15.2125	15.07375	15.165	15.3625	14.55375
8/11/2019 12:47:28	-118.5146942	42.54340682	1237.550548	8/11/19	0.82462963	0.532962963	8/11/19 12:47	12:48:26	16.25428571	16.28428571	16.53428571	16.48571429	16.58	16.40857143	15.78571429	15.84428571	16.19714286	15.8	16.08428571	15.82285714	15.96714286	15.71857143	15.83	15.63142857	15.74428571	15.23	15.70857143	15.46285714	15.52857143	15.32571429	15.14428571	15.47142857	15.30714286	15.00714286	15.22142857	15.06571429	15.08714286	15.20571429	15.25714286	14.96	14.71857143	15.13714286	14.58571429	14.30571429	15.09142857	14.75285714	14.94428571	15.12571429	14.27142857
8/11/2019 12:47:29	-118.514694	42.54341966	1237.543323	8/11/19	0.824641204	0.532974537	8/11/19 12:47	12:48:27	16.76888889	17.19111111	17.24111111	17.11777778	17.08	16.96666667	16.56555556	16.43777778	16.78333333	16.35222222	16.74111111	16.54555556	16.53444444	16.37777778	16.44111111	16.28333333	16.31333333	15.90333333	16.25555556	16.17333333	16.19333333	15.99333333	15.80555556	16.08444444	15.83222222	15.67555556	15.92444444	15.65555556	15.76	15.93	15.91444444	15.63777778	15.49	15.62222222	15.44666667	15.28111111	15.49888889	15.38777778	15.50444444	15.80222222	14.95777778
8/11/2019 12:47:30	-118.5146925	42.54343353	1237.642226	8/11/19	0.824652778	0.532986111	8/11/19 12:47	12:48:28	18.92777778	19.07666667	19.35555556	19.36555556	19.33333333	19.20111111	18.64666667	18.62888889	18.97777778	18.53	18.80222222	18.66555556	18.59222222	18.52	18.59111111	18.36	18.44444444	18.02444444	18.39666667	18.20666667	18.44555556	18.11444444	17.93555556	18.09333333	18.07111111	17.75777778	18.00333333	17.71111111	17.81222222	17.94222222	17.92	17.69555556	17.50333333	18.02444444	17.36444444	17.25777778	17.53555556	17.37222222	17.79333333	17.60333333	16.96222222
8/11/2019 12:47:31	-118.5146904	42.54344714	1237.7376	8/11/19	0.824664352	0.532997685	8/11/19 12:47	12:48:29	20.37625	20.7	20.515	20.55875	20.6275	20.375	19.755	19.85125	20.14	19.64	20.03125	19.82375	19.83125	19.59625	19.7675	19.58625	19.64875	19.26	19.55875	19.4725	19.54625	19.2675	19.065	19.35625	19.20625	19.05375	19.13125	18.97125	19.00375	19.1325	19.10375	18.77125	18.49	18.835	18.525	18.3175	18.64875	18.525	18.6025	18.83875	18.09625
8/11/2019 12:47:32	-118.5146873	42.54346001	1237.770516	8/11/19	0.824675926	0.533009259	8/11/19 12:47	12:48:30	20.27142857	20.69857143	20.68857143	20.80571429	20.70428571	20.61142857	20.04	19.96142857	20.24142857	19.84428571	20.21428571	19.99142857	19.97142857	19.86571429	20.03428571	19.69857143	19.80714286	19.31142857	19.66428571	19.54714286	19.73857143	19.30285714	19.26428571	19.49285714	19.34571429	19.10142857	19.17	19.11428571	19.16428571	19.21428571	19.23285714	18.85142857	18.79714286	19.03571429	18.62857143	18.51	18.95857143	18.68428571	18.62285714	19.10285714	18.14142857
8/11/2019 12:47:33	-118.5146846	42.54347325	1237.784419	8/11/19	0.8246875	0.533020833	8/11/19 12:47	12:48:31	20.16444444	20.33777778	20.36222222	20.18888889	20.29222222	20.09666667	19.47888889	19.55111111	19.87444444	19.39222222	19.75333333	19.63666667	19.58333333	19.4	19.50777778	19.37	19.36222222	18.92333333	19.34777778	19.12888889	19.32222222	18.97222222	18.77333333	19.08555556	18.92777778	18.66888889	18.81666667	18.59333333	18.77333333	18.77444444	18.79444444	18.51333333	18.34444444	18.59	18.33888889	18.10111111	18.54777778	18.39777778	18.46	18.62888889	17.79777778
8/11/2019 12:47:34	-118.5146823	42.5434859	1237.788581	8/11/19	0.824699074	0.533032407	8/11/19 12:47	12:48:32	20.17666667	20.38333333	20.47888889	20.60111111	20.59777778	20.27777778	19.75555556	19.78	20.12888889	19.74333333	20.11111111	19.86666667	19.83444444	19.62888889	19.69444444	19.53888889	19.63777778	19.22888889	19.51	19.29555556	19.52	19.31111111	19.02666667	19.34	19.13555556	18.97666667	19.10222222	18.89666667	19.02777778	19.02	19.08444444	18.82	18.55222222	19.03888889	18.57444444	18.49	18.83111111	18.57222222	18.72	18.99333333	18.03444444
8/11/2019 12:47:35	-118.5146797	42.5434982	1237.772871	8/11/19	0.824710648	0.533043981	8/11/19 12:47	12:48:33	19.52857143	20.10428571	20.01285714	19.93	20.00428571	19.76428571	19.12857143	19.15428571	19.40142857	19.04285714	19.41571429	19.16142857	19.09428571	19.09285714	19.09142857	18.94571429	19.07857143	18.60285714	18.90142857	18.68142857	18.87142857	18.49	18.32857143	18.61	18.52571429	18.34285714	18.42	18.29285714	18.46428571	18.49285714	18.48428571	18.25142857	17.96857143	18.53714286	18.12428571	18.19	18.45571429	18.08714286	18.29714286	18.46285714	17.56285714
8/11/2019 12:47:36	-118.5146771	42.5435108	1237.728968	8/11/19	0.824722222	0.533055556	8/11/19 12:47	12:48:34	19.01777778	19.42222222	19.31444444	19.29777778	19.42111111	19.08888889	18.67888889	18.58333333	18.92777778	18.43666667	18.84222222	18.54888889	18.63222222	18.46888889	18.56777778	18.40111111	18.48555556	18.15444444	18.35666667	18.26444444	18.41555556	18.16777778	17.98444444	18.28333333	18.09	17.79888889	18.07111111	17.91222222	17.93111111	18.07555556	17.98777778	17.77666667	17.68666667	18.31888889	17.52777778	17.59	18.01222222	17.62333333	17.81333333	18.08222222	17.07111111
8/11/2019 12:47:37	-118.5146749	42.54352288	1237.738367	8/11/19	0.824733796	0.53306713	8/11/19 12:47	12:48:35	22.57777778	22.93111111	22.79222222	22.87444444	22.88666667	22.66333333	22.20555556	22.31222222	22.54888889	22.06777778	22.43666667	22.31555556	22.2	22.08888889	22.16111111	21.98666667	22.15888889	21.57333333	21.97777778	21.70111111	22	21.63444444	21.51222222	21.80444444	21.58666667	21.37	21.44777778	21.35666667	21.45111111	21.45777778	21.47333333	21.22222222	21.04333333	21.48222222	20.94222222	20.84888889	21.01222222	20.73888889	21.02777778	21.16333333	20.33111111
8/11/2019 12:47:38	-118.5146742	42.54353486	1237.770613	8/11/19	0.82474537	0.533078704	8/11/19 12:47	12:48:36	24.775	25.01375	24.915	25.0175	25.02875	24.78	24.28875	24.265	24.4925	24.10875	24.51875	24.355	24.30375	24.1475	24.2925	24.07375	24.19125	23.78375	24.05	23.8	24.0275	23.68625	23.53125	23.78625	23.6375	23.48	23.5775	23.2825	23.40875	23.47625	23.44375	23.23	22.92375	23.17875	22.47125	22.72875	22.97625	22.84125	22.9775	22.8925	22.32625
8/11/2019 12:47:39	-118.5146742	42.54354708	1237.838161	8/11/19	0.824756944	0.533090278	8/11/19 12:47	12:48:37	25.71875	26.02375	25.92875	25.87125	25.8125	25.7725	25.28125	25.3125	25.55875	25.10625	25.5	25.3475	25.24625	25.10625	25.29625	25.05125	25.1475	24.62375	24.98375	24.81125	24.99375	24.67875	24.51	24.70125	24.665	24.3775	24.51	24.32625	24.33875	24.52625	24.4125	24.0725	23.92	24.12875	23.735	23.91	23.6925	23.7925	23.615	24.135	23.1125
8/11/2019 12:47:40	-118.5146742	42.5435603	1237.9492	8/11/19	0.824768519	0.533101852	8/11/19 12:47	12:48:38	26.47	26.94625	26.68375	26.92625	26.765	26.62	25.97375	26.00625	26.3725	25.87	26.24125	26.035	25.9575	25.89875	26.01375	25.9125	25.85	25.49375	25.78875	25.6075	25.72375	25.4325	25.25375	25.55125	25.355	25.04	25.2075	25.0125	25.11875	25.155	25.1575	24.9225	24.6075	25.015	24.3825	24.20875	24.6725	24.39375	24.6375	24.89125	23.86125
8/11/2019 12:47:41	-118.5146754	42.54357341	1238.040613	8/11/19	0.824780093	0.533113426	8/11/19 12:47	12:48:39	27.45857143	27.66857143	27.66	27.6	27.78285714	27.43428571	26.92571429	26.83	27.26571429	26.84285714	27.11428571	26.94142857	26.85857143	26.94142857	26.91714286	26.74285714	26.92857143	26.41142857	26.58571429	26.57428571	26.64142857	26.31142857	26.12	26.34857143	26.27571429	25.99428571	26.06571429	25.94	26.05571429	26.15571429	26.1	25.75142857	25.50428571	25.83285714	25.18142857	25.06	25.48142857	25.37285714	25.40428571	25.63142857	24.82428571
8/11/2019 12:47:42	-118.5146772	42.54358588	1238.108516	8/11/19	0.824791667	0.533125	8/11/19 12:47	12:48:40	27.57625	28.19875	28.01	28.01375	28.01875	27.84125	27.24	27.23	27.6225	27.1775	27.53375	27.3525	27.2925	27.32375	27.3825	27.11125	27.06625	26.79125	27.08125	26.95375	27.00375	26.63	26.5325	26.695	26.62	26.35375	26.46375	26.2625	26.315	26.40625	26.3925	26.1625	25.72375	25.88625	25.3425	25.6325	25.70625	25.67375	25.49125	26.0975	25.27125
8/11/2019 12:47:43	-118.5146793	42.54359838	1238.173258	8/11/19	0.824803241	0.533136574	8/11/19 12:47	12:48:41	27.06666667	27.52	27.31444444	27.47444444	27.54666667	27.17555556	26.68333333	26.66333333	26.99888889	26.54333333	26.96	26.64777778	26.68777778	26.61444444	26.65444444	26.47555556	26.54444444	26.17	26.44222222	26.26888889	26.42555556	26.03111111	25.96666667	26.09555556	25.98666667	25.66444444	25.87666667	25.62222222	25.72666667	25.73333333	25.80222222	25.41333333	25.23444444	25.25111111	24.75555556	24.96	25.03555556	24.92111111	25.14222222	25.43333333	24.49111111
8/11/2019 12:47:44	-118.5146823	42.54361157	1238.221613	8/11/19	0.824814815	0.533148148	8/11/19 12:47	12:48:42	26.72777778	27.05	27.14222222	27.12666667	27.11666667	26.99777778	26.37444444	26.38222222	26.74888889	26.26666667	26.68	26.47777778	26.41555556	26.29888889	26.37888889	26.13333333	26.16111111	25.79333333	26.12111111	25.94555556	26.06888889	25.79333333	25.54222222	25.83	25.59888889	25.33333333	25.56111111	25.34	25.41	25.45888889	25.45555556	25.08444444	25.00555556	25.28666667	24.60777778	24.67888889	24.87444444	24.84666667	24.98888889	25.09222222	24.14
8/11/2019 12:47:45	-118.5146861	42.54362438	1238.2118	8/11/19	0.824826389	0.533159722	8/11/19 12:47	12:48:43	27.30125	27.30375	27.4325	27.50875	27.40125	27.24375	26.73625	26.79	27.07375	26.6175	26.94625	26.74875	26.6325	26.65	26.73125	26.585	26.54	26.15125	26.50125	26.275	26.3875	26.13375	25.88	26.1325	25.95125	25.60125	25.7875	25.63375	25.7825	25.79375	25.825	25.55125	25.30625	25.59875	24.94125	24.81375	25.4325	24.8925	25.0525	25.39875	24.5675
8/11/2019 12:47:46	-118.5146909	42.54363761	1238.205839	8/11/19	0.824837963	0.533171296	8/11/19 12:47	12:48:44	26.90857143	27.31142857	27.05857143	27.19714286	27.27714286	27.02714286	26.56285714	26.45285714	26.83285714	26.40571429	26.73428571	26.57428571	26.42285714	26.28571429	26.50571429	26.20428571	26.32714286	25.91428571	26.27142857	26.06	26.12857143	25.88	25.64571429	25.71571429	25.7	25.55857143	25.64285714	25.38714286	25.49857143	25.55857143	25.54	25.29	24.96	25.27142857	24.49571429	24.76428571	24.63571429	24.71285714	24.77285714	25.00857143	24.33142857
8/11/2019 12:47:47	-118.5146981	42.54365157	1238.242484	8/11/19	0.824849537	0.53318287	8/11/19 12:47	12:48:45	26.82	27.22111111	27.13	27.23111111	27.13555556	26.96444444	26.42222222	26.38555556	26.79	26.31777778	26.68222222	26.51	26.42222222	26.31666667	26.40888889	26.24111111	26.25666667	25.85222222	26.20444444	25.98333333	26.11666667	25.78444444	25.62333333	25.85	25.76555556	25.35666667	25.56333333	25.36111111	25.46111111	25.55111111	25.45333333	25.19777778	24.93666667	25.11444444	24.74666667	24.71333333	24.78333333	24.72777778	25.02222222	25.11555556	24.27777778
8/11/2019 12:47:48	-118.5147068	42.54366584	1238.293387	8/11/19	0.824861111	0.533194444	8/11/19 12:47	12:48:46	26.955	27.33375	27.25125	27.515	27.27125	27.08625	26.5725	26.6275	26.925	26.5075	26.95	26.6	26.4825	26.515	26.5325	26.42875	26.36375	26.02375	26.3375	26.1075	26.325	25.98375	25.7425	25.9475	25.88625	25.56	25.70625	25.45125	25.65375	25.78375	25.70375	25.38125	25.145	25.3875	24.6775	25.05625	25.09875	25.07875	24.87125	25.37125	24.47625
8/11/2019 12:47:49	-118.5147157	42.54368083	1238.345161	8/11/19	0.824872685	0.533206019	8/11/19 12:47	12:48:47	26.36125	26.73625	26.68375	26.6675	26.70875	26.49875	25.95625	25.92875	26.34	25.82875	26.22625	26.0125	25.9525	25.83375	25.99	25.6825	25.77875	25.4125	25.78125	25.49375	25.71375	25.3275	25.13125	25.3225	25.28375	24.99375	25.085	24.85	24.98875	25.06	25.11125	24.775	24.4475	24.65875	24.245	24.525	24.16125	24.36	24.305	24.615	23.75375
8/11/2019 12:47:50	-118.5147242	42.54369524	1238.4722	8/11/19	0.824884259	0.533217593	8/11/19 12:47	12:48:48	24.68875	25.0275	24.9675	24.975	25.04875	24.8325	24.29375	24.285	24.7625	24.25625	24.59	24.395	24.375	24.18375	24.3	24.1775	24.17875	23.7575	24.14375	23.81875	24.01875	23.67875	23.53375	23.72	23.63625	23.3725	23.55625	23.2775	23.32125	23.4475	23.43875	23.025	22.7925	22.9975	22.35375	22.5425	22.7475	22.81625	22.775	22.96625	22.31375
8/11/2019 12:47:51	-118.5147326	42.54370931	1238.52771	8/11/19	0.824895833	0.533229167	8/11/19 12:47	12:48:49	23.79777778	24.02888889	23.88	23.96666667	24.06111111	23.90777778	23.39666667	23.31333333	23.71444444	23.31555556	23.71666667	23.45555556	23.37	23.28333333	23.32777778	23.15111111	23.20666667	22.82333333	23.17333333	22.94	23.17777778	22.71777778	22.54111111	22.83666667	22.62888889	22.49777778	22.50888889	22.38111111	22.49777778	22.52222222	22.42	22.15555556	22.00555556	22.25666667	21.37666667	21.75777778	21.81333333	21.91777778	21.75	22.13888889	21.48888889
8/11/2019 12:47:52	-118.514741	42.54372377	1238.541032	8/11/19	0.824907407	0.533240741	8/11/19 12:47	12:48:50	22.05888889	22.34333333	22.23111111	22.43555556	22.30666667	22.21777778	21.55444444	21.55888889	22.06666667	21.60333333	21.99777778	21.65222222	21.74555556	21.57777778	21.61666667	21.46222222	21.61222222	21.18111111	21.46	21.25888889	21.46555556	21.09222222	20.85888889	21.21777778	21.01777778	20.78222222	20.84444444	20.78444444	20.93444444	20.89222222	20.92444444	20.65666667	20.26333333	20.65333333	19.94888889	20.06222222	20.11555556	20.32222222	20.14888889	20.56888889	19.69555556
8/11/2019 12:47:53	-118.5147487	42.54373804	1238.592226	8/11/19	0.824918981	0.533252315	8/11/19 12:47	12:48:51	20.4125	20.785	20.785	20.78625	21.0125	20.635	20.115	20.14	20.56625	20.12625	20.46875	20.17375	20.19	20.11	20.07	20.05125	20.055	19.6175	20.0125	19.775	19.97625	19.4875	19.38	19.75375	19.46375	19.25125	19.44	19.2475	19.31875	19.49125	19.54	19.0975	18.83375	19.06875	18.56625	18.64375	18.75375	18.8725	18.835	19.0025	18.1375
8/11/2019 12:47:54	-118.5147554	42.54375114	1238.627	8/11/19	0.824930556	0.533263889	8/11/19 12:47	12:48:52	19.17888889	19.65666667	19.64444444	19.75666667	19.82	19.55777778	19.14777778	18.88444444	19.44444444	19.00333333	19.33444444	19.11888889	19.03222222	18.99111111	19.08555556	18.90777778	18.93777778	18.57555556	18.90111111	18.68111111	18.84555556	18.56	18.41	18.59333333	18.43111111	18.28111111	18.34888889	18.16222222	18.28444444	18.44222222	18.49	18.04444444	17.69666667	18.01666667	17.42222222	17.29888889	17.63666667	17.65222222	17.78	17.92111111	17.18888889
8/11/2019 12:47:55	-118.5147616	42.54376436	1238.658516	8/11/19	0.82494213	0.533275463	8/11/19 12:47	12:48:53	18.37375	18.8575	18.8375	18.77125	18.8525	18.7425	18.06875	18.06875	18.6	18.09125	18.49	18.33375	18.21125	18.13625	18.105	18.04625	18.1625	17.63375	18.19	17.87375	18.03	17.655	17.515	17.8525	17.70875	17.345	17.4775	17.41	17.47	17.59375	17.5875	17.105	16.8675	17.355	16.525	16.45375	16.88875	16.685	16.69	17.13	16.19875
8/11/2019 12:47:56	-118.5147683	42.54377789	1238.67171	8/11/19	0.824953704	0.533287037	8/11/19 12:47	12:48:54	18.05	18.24666667	18.40222222	18.33888889	18.39666667	18.31777778	17.64888889	17.77777778	18.14444444	17.76333333	18.07888889	17.93333333	17.78222222	17.74555556	17.80666667	17.60222222	17.73777778	17.25555556	17.70222222	17.47	17.66888889	17.32888889	17.08777778	17.42888889	17.23666667	17.08555556	17.26777778	17.00111111	17.10333333	17.15777778	17.26555556	16.93666667	16.58111111	17.06	16.24	16.27333333	16.64888889	16.48	16.46666667	16.98222222	15.99555556
8/11/2019 12:47:57	-118.5147752	42.54379132	1238.6874	8/11/19	0.824965278	0.533298611	8/11/19 12:47	12:48:55	17.38142857	17.88428571	17.50857143	17.71714286	17.79857143	17.64571429	17.17285714	17.22285714	17.55428571	17.18428571	17.56142857	17.24857143	17.19714286	17.24857143	17.35857143	17.15428571	17.13142857	16.80714286	17.17857143	16.79285714	17.10571429	16.73	16.59857143	16.86142857	16.86428571	16.42142857	16.68285714	16.46857143	16.51	16.62	16.58285714	16.31857143	16.07285714	16.58857143	15.46285714	15.63714286	15.93142857	15.85428571	15.84142857	16.22857143	15.35428571
8/11/2019 12:47:58	-118.5147817	42.54380408	1238.677097	8/11/19	0.824976852	0.533310185	8/11/19 12:47	12:48:56	17.00375	17.08	17.2075	17.36875	17.315	17.13875	16.56125	16.59625	17.12625	16.67125	17.03875	16.79375	16.8475	16.66875	16.775	16.60375	16.61875	16.29375	16.63625	16.41	16.57875	16.2475	16.105	16.48125	16.23875	16.03125	16.18125	15.99625	16.0775	16.2175	16.17	15.84875	15.56375	15.97875	15.03625	15.0675	15.59125	15.4575	15.2025	15.69125	14.975
8/11/2019 12:47:59	-118.5147882	42.5438169	1238.692839	8/11/19	0.824988426	0.533321759	8/11/19 12:47	12:48:57	16.57555556	17.05	16.79666667	16.90555556	17.03333333	16.85222222	16.38333333	16.36888889	16.81	16.37111111	16.68888889	16.51	16.40666667	16.37111111	16.44111111	16.31	16.36	15.97777778	16.37555556	16.10888889	16.28222222	16.03666667	15.92222222	16.18222222	15.95666667	15.81444444	15.90444444	15.71777778	15.83888889	15.98777778	16.04666667	15.61444444	15.30444444	15.76555556	14.80333333	15.02333333	15.30333333	15.21777778	15.35666667	15.64555556	14.71444444
8/11/2019 12:48:00	-118.5147929	42.54383045	1238.775387	8/11/19	0.825	0.533333333	8/11/19 12:48	12:48:58	16.7075	17.10875	17.1925	17.09625	17.28125	17.005	16.5775	16.57375	17.025	16.56375	16.96125	16.68125	16.63375	16.58125	16.7475	16.405	16.65875	16.11875	16.48125	16.29625	16.5325	16.1975	15.98	16.325	16.12625	15.935	16.0025	15.96125	16.0225	16.02625	15.975	15.92125	15.3925	15.79875	15.0775	14.985	15.3625	15.365	15.5875	15.64	14.7525
8/11/2019 12:48:01	-118.5147946	42.54384348	1238.869355	8/11/19	0.825011574	0.533344907	8/11/19 12:48	12:48:59	16.7475	17.22875	17.21875	17.2725	17.48375	17.2775	16.76625	16.795	17.205	16.8125	17.17	16.88625	17.0375	16.75625	16.8825	16.77	16.91625	16.4525	16.81125	16.59125	16.86125	16.405	16.26875	16.5975	16.47625	16.27	16.35375	16.20625	16.29125	16.48125	16.2875	16.1175	15.81125	16.06375	15.2125	15.16125	15.7075	15.56375	15.7675	15.915	15.16625
8/11/2019 12:48:02	-118.5147926	42.54385468	1238.973	8/11/19	0.825023148	0.533356481	8/11/19 12:48	12:49:00	17.02888889	17.43777778	17.39222222	17.47111111	17.51666667	17.36555556	16.76111111	16.81777778	17.27	16.94888889	17.16	17.00222222	16.89444444	16.84888889	16.92666667	16.8	16.94111111	16.51777778	16.89222222	16.62222222	16.87111111	16.48333333	16.33888889	16.62555556	16.5	16.27777778	16.39666667	16.28666667	16.32	16.40777778	16.42666667	16.07	15.73777778	16.03555556	15.19666667	15.28777778	15.76777778	15.57666667	15.90222222	16.25333333	15.10555556
8/11/2019 12:48:03	-118.514787	42.54386555	1238.897452	8/11/19	0.825034722	0.533368056	8/11/19 12:48	12:49:01	16.54375	16.87125	16.9775	17.02625	17.19375	16.98375	16.3225	16.375	16.82625	16.4625	16.725	16.49375	16.4375	16.4325	16.4625	16.38625	16.41875	15.96375	16.315	16.09875	16.36625	15.985	15.895	16.1425	15.9575	15.8275	15.96625	15.7	15.905	16.01125	16.02875	15.7	15.345	15.56625	14.89125	14.95	15.40625	15.32375	15.46625	15.785	14.90375
8/11/2019 12:48:04	-118.5147784	42.54387542	1238.824903	8/11/19	0.825046296	0.53337963	8/11/19 12:48	12:49:02	16.26875	16.9725	16.78875	16.8575	16.84375	16.59	16.18125	16.14375	16.60375	16.1625	16.6225	16.32875	16.35625	16.2525	16.30875	16.16625	16.29875	15.7675	16.18375	15.9525	16.14	15.79125	15.695	16.0325	15.805	15.5675	15.8675	15.6275	15.71375	15.87375	15.84625	15.5	15.21625	15.50375	14.5575	15.03375	15.33375	15.05375	15.2475	15.72125	14.79375
8/11/2019 12:48:05	-118.5147676	42.5438846	1238.843839	8/11/19	0.82505787	0.533391204	8/11/19 12:48	12:49:03	15.945	15.99125	16.3475	16.31625	16.34	16.385	15.70125	15.76875	16.165	15.7275	16.14375	15.85625	15.965	15.81125	15.87875	15.71375	15.84625	15.3775	15.85125	15.5225	15.745	15.39375	15.26875	15.5275	15.41875	15.30125	15.39375	15.27375	15.37375	15.44125	15.375	15.05	14.9	15.2	14.39875	14.36375	14.86875	14.71875	14.805	15.03625	14.3125
8/11/2019 12:48:06	-118.5147556	42.54389098	1238.8948	8/11/19	0.825069444	0.533402778	8/11/19 12:48	12:49:04	15.78125	16.23375	16.1775	16.3275	16.265	16.13	15.61875	15.56	16.07125	15.70375	16.01625	15.7775	15.66	15.6325	15.7125	15.57875	15.71625	15.265	15.7175	15.34	15.67	15.31875	15.17625	15.45	15.32625	15.13875	15.245	15.07375	15.17625	15.27	15.3275	15.0775	14.71625	15.10875	14.185	14.4	14.86875	14.76875	14.715	15.19625	14.09125
8/11/2019 12:48:07	-118.5147429	42.54389486	1239.019742	8/11/19	0.825081019	0.533414352	8/11/19 12:48	12:49:05	15.72333333	16.12222222	16.16222222	16.24	16.35888889	16.20555556	15.58888889	15.65555556	16.05333333	15.66666667	16.06666667	15.86555556	15.75444444	15.64222222	15.82222222	15.73111111	15.72333333	15.28222222	15.69555556	15.46	15.73666667	15.23777778	15.17222222	15.49888889	15.39555556	15.15222222	15.32111111	15.18777778	15.25666667	15.24666667	15.34333333	15.04	14.69333333	15.18666667	14.15777778	14.39555556	14.76111111	14.59555556	14.67	15.23222222	14.07222222
8/11/2019 12:48:08	-118.5147295	42.54389703	1239.055871	8/11/19	0.825092593	0.533425926	8/11/19 12:48	12:49:06	15.98125	16.3025	16.23	16.3025	16.36625	16.3025	15.575	15.66	16.12125	15.745	16.03625	15.83375	15.78	15.66	15.82625	15.65375	15.76375	15.25125	15.68375	15.38625	15.69	15.34	15.2275	15.4275	15.36875	15.1875	15.3675	15.08125	15.32	15.27	15.30625	15.07125	14.71125	14.90625	14.44	14.40875	14.4975	14.48625	14.67	14.88375	14.19375
8/11/2019 12:48:09	-118.514715	42.54389736	1239.123968	8/11/19	0.825104167	0.5334375	8/11/19 12:48	12:49:07	16.04375	16.4025	16.41875	16.43125	16.5875	16.38375	15.875	15.8075	16.2775	15.88625	16.235	16.0975	15.965	15.9025	15.99	15.9275	15.95375	15.4825	15.93875	15.55625	15.93125	15.585	15.37375	15.66125	15.565	15.33375	15.53125	15.31625	15.44375	15.43	15.43	15.155	14.93125	15.3325	14.67625	14.455	14.9025	14.97375	14.94	15.4075	14.30125
8/11/2019 12:48:10	-118.5147002	42.54389604	1239.118032	8/11/19	0.825115741	0.533449074	8/11/19 12:48	12:49:08	15.97333333	16.34444444	16.39666667	16.32222222	16.41	16.33888889	15.91555556	15.76333333	16.31555556	15.89444444	16.30666667	15.98555556	15.94777778	15.82222222	15.98666667	15.81222222	15.97222222	15.54888889	15.87	15.67111111	15.95333333	15.47777778	15.40111111	15.77444444	15.62555556	15.44111111	15.53666667	15.32555556	15.47666667	15.52888889	15.48666667	15.21777778	14.99222222	15.30888889	14.43666667	14.43666667	14.93555556	14.84222222	15.02333333	15.30333333	14.28666667
8/11/2019 12:48:11	-118.5146865	42.5438923	1239.093	8/11/19	0.825127315	0.533460648	8/11/19 12:48	12:49:09	16.53125	17.06375	16.6725	17.0675	16.90875	16.88375	16.32625	16.3775	16.90125	16.355	16.86375	16.61875	16.5325	16.3825	16.475	16.41375	16.4575	16.01625	16.4275	16.22125	16.36	16.0725	15.89375	16.31	16.05875	15.92875	16.1125	15.92	16.09125	16.08875	16.1	15.7625	15.5875	15.84	14.80375	15.23625	15.39875	15.33125	15.30875	15.82	14.8975
8/11/2019 12:48:12	-118.5146732	42.54388601	1239.003484	8/11/19	0.825138889	0.533472222	8/11/19 12:48	12:49:10	16.60857143	16.99857143	17.05428571	17.12714286	17.19285714	16.97428571	16.48571429	16.58142857	16.93857143	16.55142857	16.91142857	16.67	16.65428571	16.46142857	16.61142857	16.45571429	16.53857143	16.08285714	16.56428571	16.28142857	16.54285714	16.24857143	16.05857143	16.43571429	16.20428571	16.03714286	16.18571429	15.93285714	16.06285714	16.1	16.04285714	15.95714286	15.59285714	15.80714286	15.01428571	15.18	15.47857143	15.59142857	15.67571429	15.88857143	15.06428571
8/11/2019 12:48:13	-118.51466	42.54387804	1238.947613	8/11/19	0.825150463	0.533483796	8/11/19 12:48	12:49:11	16.3525	16.83625	16.93125	16.81	16.98875	16.96125	16.34875	16.34	16.82125	16.45	16.7375	16.52	16.49125	16.375	16.4975	16.41125	16.4975	16.005	16.38875	16.12125	16.405	16.10125	15.99625	16.3425	16.0325	15.88375	16.095	15.86125	15.93125	16.08875	16.0675	15.77375	15.35125	15.7225	14.91	15.00375	15.38	15.37625	15.45125	15.85	14.88
8/11/2019 12:48:14	-118.5146477	42.5438683	1238.93629	8/11/19	0.825162037	0.53349537	8/11/19 12:48	12:49:12	17.2	17.735	17.50375	17.54875	17.64125	17.50625	16.9775	16.9925	17.49625	16.9975	17.39875	17.21	17.27	17.14875	17.12875	16.995	17.1575	16.7775	17.12375	16.84	17.09625	16.7075	16.675	16.92875	16.84	16.53	16.875	16.58875	16.74	16.69375	16.80625	16.42	16.23625	16.41625	15.5675	15.6275	15.96375	16.0925	16.02625	16.4675	15.61375
8/11/2019 12:48:15	-118.5146359	42.54385689	1239.049	8/11/19	0.825173611	0.533506944	8/11/19 12:48	12:49:13	18.11	18.50125	18.4475	18.4825	18.6	18.56	18.02875	18.0225	18.50125	18.12125	18.43625	18.17375	18.26	18.185	18.1975	18.1025	18.2025	17.78	18.22375	17.91	18.1475	17.8575	17.70125	18.01375	17.89125	17.7325	17.88375	17.6575	17.7525	17.8675	17.92	17.56625	17.39375	17.4275	16.38875	16.80125	17.005	17.10875	17.305	17.6675	16.85375
8/11/2019 12:48:16	-118.5146266	42.54384486	1239.1528	8/11/19	0.825185185	0.533518519	8/11/19 12:48	12:49:14	16.88875	17.41375	17.30375	17.5325	17.59375	17.4325	16.82125	16.9025	17.2825	16.87875	17.2525	17.06875	16.98375	16.95875	17.14125	16.9175	17.09625	16.6275	16.935	16.65875	17.03875	16.68125	16.4525	16.82875	16.63125	16.475	16.67	16.465	16.59625	16.73625	16.50625	16.265	16.04375	16.33625	15.57625	15.80375	16.1575	16.12375	15.9725	16.43	15.66875
8/11/2019 12:48:17	-118.5146203	42.54383139	1239.211935	8/11/19	0.825196759	0.533530093	8/11/19 12:48	12:49:15	16.64333333	16.86222222	16.74333333	16.71222222	16.95555556	16.87888889	16.17666667	16.13777778	16.66666667	16.33111111	16.60333333	16.41222222	16.41333333	16.33444444	16.35888889	16.28555556	16.43555556	15.92	16.31222222	16.03222222	16.28	15.99888889	15.75111111	16.12444444	15.94333333	15.73777778	15.92777778	15.73555556	15.76666667	15.92	15.93333333	15.71888889	15.36666667	15.66333333	14.98333333	14.71666667	15.14777778	15.32444444	15.47666667	15.71666667	14.65111111
8/11/2019 12:48:18	-118.5146159	42.54381709	1239.200161	8/11/19	0.825208333	0.533541667	8/11/19 12:48	12:49:16	16.60125	17.05625	16.98875	17.14	17.1925	17.13875	16.56875	16.44875	16.98125	16.5575	16.98	16.68125	16.63	16.65625	16.7	16.51625	16.6125	16.13375	16.5975	16.23125	16.5625	16.22	15.98375	16.4975	16.20125	16.0475	16.175	16.07875	16.145	16.175	16.16875	15.86125	15.605	15.92625	14.97125	15.145	15.575	15.43	15.7075	15.99625	15
8/11/2019 12:48:19	-118.5146131	42.54380302	1239.199387	8/11/19	0.825219907	0.533553241	8/11/19 12:48	12:49:17	16.89555556	17.39555556	17.28666667	17.34444444	17.39	17.27111111	16.75666667	16.80444444	17.25	16.80777778	17.13111111	16.92111111	16.87777778	16.80555556	16.91888889	16.77888889	16.90888889	16.34333333	16.80666667	16.49666667	16.80777778	16.37333333	16.24666667	16.57888889	16.38666667	16.18777778	16.37777778	16.22111111	16.26555556	16.29333333	16.44222222	15.99555556	15.74555556	15.86333333	15.24	15.31444444	15.86222222	15.51555556	15.73888889	15.94333333	15.13222222
8/11/2019 12:48:20	-118.5146121	42.54378916	1239.146	8/11/19	0.825231481	0.533564815	8/11/19 12:48	12:49:18	17.11625	17.4975	17.3925	17.54375	17.52875	17.47	16.94125	16.915	17.345	16.9475	17.43125	17.04625	16.98875	16.95875	17.04625	16.97625	16.99	16.45375	16.88625	16.6125	16.85875	16.53875	16.3175	16.68375	16.545	16.29625	16.465	16.14375	16.43	16.56375	16.44625	16.22625	15.99625	16.4475	15.32375	15.43125	15.7875	15.855	15.95125	16.22125	15.1025
8/11/2019 12:48:21	-118.514613	42.54377513	1239.156806	8/11/19	0.825243056	0.533576389	8/11/19 12:48	12:49:19	17.54888889	17.73666667	17.84888889	17.80888889	18.02777778	17.97444444	17.38333333	17.34777778	17.86	17.41111111	17.74	17.47666667	17.45777778	17.39	17.41555556	17.29444444	17.45333333	16.93444444	17.29666667	17.11444444	17.38	17.01888889	16.87	17.12777778	16.92777778	16.70333333	16.78888889	16.64333333	16.73111111	16.87222222	16.86555556	16.49	16.44111111	16.70222222	15.72555556	15.93444444	16.09666667	16.08	16.08444444	16.58222222	15.57666667
8/11/2019 12:48:22	-118.5146155	42.54376039	1239.285677	8/11/19	0.82525463	0.533587963	8/11/19 12:48	12:49:20	18.64125	19.1825	18.98	19.16375	19.125	19.1075	18.615	18.5875	18.8225	18.6025	18.96625	18.72625	18.63625	18.545	18.595	18.46125	18.56	18.0925	18.57625	18.2075	18.52125	18.0475	17.9075	18.26	18.0775	17.89875	18.11	17.8025	17.9475	18.0825	18.15875	17.85125	17.585	17.855	17.29875	16.8275	17.24375	17.2	17.275	17.625	16.70875
8/11/2019 12:48:23	-118.514619	42.5437458	1239.326968	8/11/19	0.825266204	0.533599537	8/11/19 12:48	12:49:21	20.14375	20.5975	20.4625	20.40125	20.5975	20.5	20.02375	19.9675	20.37125	19.92	20.33625	20.0675	20.0225	19.83875	19.935	19.87375	19.96375	19.41375	19.8875	19.50875	19.78125	19.345	19.19125	19.62375	19.405	19.15375	19.365	19.17125	19.27625	19.51	19.27625	18.94125	18.7725	19.14	17.9675	18.20625	18.6575	18.44	18.625	19.0175	18.055
8/11/2019 12:48:24	-118.5146232	42.5437314	1239.314613	8/11/19	0.825277778	0.533611111	8/11/19 12:48	12:49:22	19.615	19.86	19.69375	19.855	19.94125	19.755	19.285	19.19625	19.635	19.16	19.5975	19.37625	19.29875	19.2275	19.32875	19.16375	19.225	18.70375	19.115	18.85	19.075	18.75	18.63375	18.8775	18.67125	18.51875	18.6775	18.5075	18.58875	18.68375	18.76125	18.45125	18.2175	18.60125	17.79	17.64625	18.0025	17.8725	18.055	18.59	17.5125
8/11/2019 12:48:25	-118.5146274	42.54371716	1239.401	8/11/19	0.825289352	0.533622685	8/11/19 12:48	12:49:23	19.96888889	20.45888889	20.22777778	20.32777778	20.35333333	20.27777778	19.75555556	19.69888889	20.03	19.69777778	20.08555556	19.92666667	19.75333333	19.68888889	19.83222222	19.58444444	19.78888889	19.26222222	19.67	19.35888889	19.60666667	19.17666667	19.11111111	19.33888889	19.25444444	18.98	19.19666667	18.94888889	19.09666667	19.22888889	19.18444444	18.89	18.70888889	19.18666667	18.19111111	18.43333333	18.65	18.42666667	18.68666667	18.75222222	17.92222222
8/11/2019 12:48:26	-118.5146323	42.54370259	1239.430903	8/11/19	0.825300926	0.533634259	8/11/19 12:48	12:49:24	22.72	23.51375	23.25875	23.3325	23.2875	23.19375	22.71	22.6325	23.15625	22.6625	23.01125	22.78125	22.74625	22.635	22.79375	22.55125	22.66375	22.2025	22.5775	22.22625	22.5825	22.17625	21.94875	22.28625	22.0975	21.85	22.0075	21.79625	21.8975	21.98375	21.99375	21.76375	21.44125	21.8475	20.6225	20.895	21.12125	21.02875	21.06375	21.48125	20.51
8/11/2019 12:48:27	-118.514637	42.54368775	1239.495935	8/11/19	0.8253125	0.533645833	8/11/19 12:48	12:49:25	23.50375	24.00375	24.01875	24.07375	24.2475	23.985	23.45	23.40875	23.85375	23.38375	23.87625	23.52375	23.55625	23.37125	23.44375	23.31375	23.41	22.91125	23.47875	22.98625	23.27875	22.96625	22.79375	23.1325	22.86625	22.71125	22.7625	22.6175	22.6275	22.7675	22.61625	22.4325	22.09375	22.25375	21.2275	21.6125	21.78375	21.7675	21.935	22.07	21.1975
8/11/2019 12:48:28	-118.5146421	42.54367306	1239.5448	8/11/19	0.825324074	0.533657407	8/11/19 12:48	12:49:26	22.855	23.47125	23.075	23.18375	23.395	23.1075	22.6025	22.6825	23.09	22.59375	23.01875	22.68125	22.63875	22.58625	22.64875	22.48875	22.65875	22.02375	22.505	22.26375	22.48	22.03	21.99375	22.16125	22.05	21.78625	21.9925	21.68	21.84125	21.945	21.90375	21.59125	21.29	21.49	20.63875	20.8025	21.085	20.9675	21.025	21.37125	20.61375
8/11/2019 12:48:29	-118.5146487	42.54365784	1239.525226	8/11/19	0.825335648	0.533668981	8/11/19 12:48	12:49:27	21.55666667	22.08333333	21.85666667	22.04555556	21.92666667	21.73888889	21.22888889	21.18444444	21.69777778	21.25888889	21.57555556	21.38111111	21.27555556	21.22555556	21.26555556	21.08444444	21.22444444	20.73666667	21.2	20.83222222	21.10888889	20.67	20.50666667	20.79111111	20.67111111	20.37111111	20.61111111	20.30444444	20.47444444	20.54222222	20.48777778	20.24888889	20.13888889	20.48	19.62666667	19.56666667	19.79555556	19.69222222	19.97666667	20.33555556	19.03666667
8/11/2019 12:48:30	-118.5146554	42.54364232	1239.464645	8/11/19	0.825347222	0.533680556	8/11/19 12:48	12:49:28	23.74857143	24.28	24.10571429	24.21714286	24.11428571	24.12714286	23.65571429	23.46285714	23.88857143	23.54	23.93428571	23.64	23.60142857	23.53285714	23.52857143	23.44857143	23.45428571	23.03714286	23.43285714	23.06714286	23.33142857	22.95142857	22.92	23.12714286	22.88142857	22.64714286	22.82571429	22.60571429	22.63142857	22.78428571	22.76285714	22.53285714	22.26285714	22.71857143	21.53	21.91428571	22.02857143	21.86714286	22.05285714	22.36142857	21.32142857
8/11/2019 12:48:31	-118.5146614	42.5436271	1239.426581	8/11/19	0.825358796	0.53369213	8/11/19 12:48	12:49:29	24.19714286	24.40142857	24.44142857	24.49714286	24.50142857	24.36	23.69	23.73428571	24.27142857	23.88428571	24.21142857	23.93714286	23.83571429	23.72142857	23.84285714	23.67285714	23.73142857	23.37285714	23.69285714	23.27	23.7	23.22142857	23.07714286	23.34142857	23.21142857	22.91285714	23.04714286	22.82285714	23.00285714	22.99	23.00714286	22.67285714	22.45857143	22.93142857	22.07857143	22.18857143	22.34285714	22.11571429	22.31	22.75857143	21.75571429
8/11/2019 12:48:32	-118.5146668	42.54361229	1239.418774	8/11/19	0.82537037	0.533703704	8/11/19 12:48	12:49:30	24.25333333	24.75222222	24.72888889	24.88	24.87666667	24.72111111	24.22888889	24.21888889	24.57333333	24.11	24.53	24.25666667	24.14555556	24.17888889	24.17555556	24.07888889	24.10111111	23.53777778	24.09666667	23.68444444	23.94666667	23.46111111	23.43222222	23.73333333	23.54555556	23.28111111	23.42888889	23.17	23.27333333	23.49111111	23.37777778	23.16777778	22.84777778	23.17666667	22.24666667	22.33777778	22.70222222	22.49333333	22.79666667	22.83	21.98555556
8/11/2019 12:48:33	-118.5146719	42.54359742	1239.4988	8/11/19	0.825381944	0.533715278	8/11/19 12:48	12:49:31	25.92333333	26.36222222	26.22333333	26.32	26.29111111	26.21111111	25.66666667	25.65444444	26.13	25.60777778	26.01222222	25.81444444	25.71666667	25.58333333	25.69222222	25.57555556	25.70333333	25.08333333	25.53444444	25.11444444	25.46444444	25.00111111	24.97444444	25.19888889	25.08333333	24.77555556	24.94555556	24.64111111	24.83111111	24.94111111	24.90666667	24.48222222	24.33444444	24.58222222	23.72888889	23.66	23.95777778	23.79555556	24.01666667	24.19333333	23.26666667
8/11/2019 12:48:34	-118.5146773	42.54358255	1239.553	8/11/19	0.825393519	0.533726852	8/11/19 12:48	12:49:32	26.49625	26.87625	26.78	26.88	26.86	26.72875	26.3125	26.2575	26.7425	26.31125	26.73625	26.47	26.33625	26.305	26.38	26.27625	26.295	25.7875	26.22125	25.81375	26.18625	25.74375	25.5675	25.8325	25.71875	25.45125	25.615	25.265	25.555	25.5475	25.50875	25.15625	25.005	25.26375	24.20625	24.38625	24.5925	24.525	24.615	24.885	24.0475
8/11/2019 12:48:35	-118.5146827	42.54356712	1239.630645	8/11/19	0.825405093	0.533738426	8/11/19 12:48	12:49:33	27.1725	27.43125	27.43125	27.38375	27.29625	27.24625	26.82125	26.7675	27.2875	26.73125	27.06125	26.93	26.86375	26.7525	26.83375	26.7375	26.8175	26.28	26.72875	26.4275	26.53875	26.1925	26.02625	26.34875	26.16375	25.9525	26.085	25.7525	25.87625	26.0075	26.0575	25.64875	25.34125	25.52875	24.6475	24.805	24.9475	25.1575	24.91125	25.37875	24.51125
8/11/2019 12:48:36	-118.5146881	42.5435519	1239.703387	8/11/19	0.825416667	0.53375	8/11/19 12:48	12:49:34	26.24125	26.34375	26.41875	26.5825	26.545	26.5475	25.955	25.85	26.44625	25.95375	26.42875	26.05875	26.02125	25.9625	26.05875	25.8925	25.9475	25.515	25.75125	25.555	25.7625	25.35625	25.16125	25.4825	25.3375	25.00375	25.2475	24.99375	25.13625	25.19625	25.11875	24.79875	24.61125	24.64625	23.56875	23.80875	24.435	24.055	24.11875	24.56375	23.475
8/11/2019 12:48:37	-118.5146934	42.54353695	1239.661742	8/11/19	0.825428241	0.533761574	8/11/19 12:48	12:49:35	23.00111111	23.32111111	23.15777778	23.21222222	23.34666667	23.30777778	22.69444444	22.67111111	23.20111111	22.59111111	23.07111111	22.78555556	22.64333333	22.63888889	22.66333333	22.57222222	22.62333333	22.11222222	22.57	22.25444444	22.39888889	22.13111111	21.92777778	22.24666667	22.02666667	21.75555556	21.92	21.70444444	21.81555556	21.96666667	21.81333333	21.57666667	21.36222222	21.51444444	20.83888889	20.46111111	21.08444444	21.04888889	20.93888889	21.48666667	20.42333333
8/11/2019 12:48:38	-118.5146987	42.54352278	1239.573	8/11/19	0.825439815	0.533773148	8/11/19 12:48	12:49:36	19.82	20.2725	20.37125	20.35375	20.3525	20.19875	19.61875	19.52875	20.02875	19.5425	19.9325	19.62625	19.625	19.63375	19.60875	19.48375	19.63	19.09375	19.5325	19.14375	19.46125	19.07875	18.89	19.19375	19.0325	18.83375	18.86875	18.7225	18.83875	19.03875	19.0125	18.68	18.4675	18.8525	18.1425	18.02	18.35625	18.33375	18.5275	18.61125	17.8075
8/11/2019 12:48:39	-118.5147043	42.54350884	1239.58871	8/11/19	0.825451389	0.533784722	8/11/19 12:48	12:49:37	18.95625	19.17	19.11	19.3125	19.35875	19.23625	18.74	18.6	19.04	18.63875	19.04125	18.70875	18.65625	18.58125	18.6025	18.5675	18.49375	18.1025	18.5025	18.1975	18.52125	18.12375	17.9	18.2625	18.07375	17.82875	18.06625	17.87375	17.94625	18.04625	18.12125	17.72625	17.53875	18.06625	17.27	17.04375	17.27875	17.47625	17.65	17.80625	16.82625
8/11/2019 12:48:40	-118.5147095	42.543495	1239.692903	8/11/19	0.825462963	0.533796296	8/11/19 12:48	12:49:38	19.54888889	20.14888889	20.23888889	20.00777778	20.21222222	19.92	19.41222222	19.30888889	19.73111111	19.34888889	19.77333333	19.46888889	19.44888889	19.36555556	19.39333333	19.31333333	19.32888889	18.95666667	19.28888889	18.93888889	19.27	18.90777778	18.80222222	19.01444444	18.80666667	18.66222222	18.82777778	18.59777778	18.76333333	18.87333333	18.86222222	18.53555556	18.27666667	18.77111111	17.99	18.06222222	18.52333333	18.01111111	18.14666667	18.50222222	17.55333333
8/11/2019 12:48:41	-118.5147143	42.54348141	1239.764806	8/11/19	0.825474537	0.53380787	8/11/19 12:48	12:49:39	21.40625	21.9925	21.91	21.8225	21.915	21.75625	21.16375	21.175	21.675	21.26125	21.61	21.29375	21.275	21.23625	21.24875	21.1475	21.215	20.78375	21.17375	20.745	21.12625	20.68	20.5425	20.92125	20.71	20.49	20.6625	20.38125	20.39875	20.51	20.505	20.31625	20.06625	20.57	19.74	19.90125	19.9825	19.68625	19.86375	20.18875	19.22875
8/11/2019 12:48:42	-118.5147194	42.54346764	1239.838935	8/11/19	0.825486111	0.533819444	8/11/19 12:48	12:49:40	22.14333333	22.555	22.44666667	22.43833333	22.62166667	22.45333333	21.855	21.78	22.26333333	21.845	22.22833333	21.83666667	21.86666667	21.825	21.84833333	21.67666667	21.81833333	21.21166667	21.63	21.36	21.62333333	21.23666667	21.08833333	21.37666667	21.16333333	20.915	21.01166667	20.85166667	20.95	21.13833333	20.95166667	20.84333333	20.52833333	20.85	19.95833333	20.04333333	20.54	20.25666667	20.36333333	20.87	19.79166667
8/11/2019 12:48:43	-118.5147238	42.54345372	1239.8912	8/11/19	0.825497685	0.533831019	8/11/19 12:48	12:49:41	21.04571429	21.42	21.59571429	21.55714286	21.62285714	21.43285714	20.88571429	20.86714286	21.29142857	20.84571429	21.35714286	20.94142857	20.97571429	20.85	20.84	20.76	20.87428571	20.42285714	20.83428571	20.48571429	20.78	20.38142857	20.26142857	20.51	20.26857143	20.04142857	20.28714286	19.99714286	20.09571429	20.25857143	20.26285714	19.93142857	19.63714286	19.84428571	19.21285714	19.11714286	19.46571429	19.36142857	19.52285714	19.9	18.80857143
8/11/2019 12:48:44	-118.5147285	42.54343968	1239.968968	8/11/19	0.825509259	0.533842593	8/11/19 12:48	12:49:42	19.825	20.3575	20.14375	20.36	20.27625	20.305	19.60125	19.56125	20.04375	19.605	20.0625	19.66375	19.71	19.565	19.6875	19.47625	19.62	19.1575	19.50625	19.155	19.4775	19.03375	18.8925	19.34875	19.0825	18.7775	18.90875	18.71125	18.9325	18.9175	19.00625	18.70875	18.33125	18.95875	17.95625	18.20625	18.39125	18.2625	18.37	18.71375	17.6625
8/11/2019 12:48:45	-118.5147337	42.54342524	1240.02371	8/11/19	0.825520833	0.533854167	8/11/19 12:48	12:49:43	17.63444444	18.24	18.12444444	18.2	18.12444444	18.18888889	17.49888889	17.48	17.95666667	17.55333333	17.94	17.62888889	17.56111111	17.50444444	17.53777778	17.34	17.50555556	17.01111111	17.43555556	17.13444444	17.41111111	16.98888889	16.83888889	17.19222222	16.96	16.77333333	16.92333333	16.70333333	16.90333333	17.02333333	17.02777778	16.61777778	16.42777778	16.68111111	16.09222222	15.95888889	16.51333333	16.45555556	16.38444444	16.61555556	15.64222222
8/11/2019 12:48:46	-118.5147388	42.54341079	1240.105516	8/11/19	0.825532407	0.533865741	8/11/19 12:48	12:49:44	16.235	16.675	16.62625	16.56375	16.77875	16.545	16.1275	16.08875	16.55875	16.19625	16.48875	16.2125	16.115	16.08	16.16375	15.95625	16.1125	15.605	16.04	15.645	15.9375	15.6275	15.4825	15.81	15.68125	15.3425	15.60875	15.2875	15.52875	15.61	15.54875	15.23375	15.06	15.5975	14.5	14.41625	15.1675	14.975	15.09	15.39125	14.3925
8/11/2019 12:48:47	-118.5147443	42.54339614	1240.1724	8/11/19	0.825543981	0.533877315	8/11/19 12:48	12:49:45	17.03714286	17.67571429	17.32285714	17.53285714	17.59714286	17.45428571	16.94571429	16.86285714	17.30142857	16.98	17.26428571	17.05142857	17.06857143	16.95857143	16.99142857	16.89142857	17.07285714	16.62	16.98714286	16.69714286	16.93142857	16.59571429	16.38142857	16.83571429	16.61	16.41285714	16.62285714	16.38428571	16.45571429	16.65285714	16.52571429	16.36	16.04142857	16.44714286	15.70714286	15.49857143	16.22285714	15.85571429	16.19428571	16.22857143	15.37428571
8/11/2019 12:48:48	-118.51475	42.54338049	1240.203871	8/11/19	0.825555556	0.533888889	8/11/19 12:48	12:49:46	18.7675	19.47625	19.33625	19.475	19.505	19.33125	18.745	18.70125	19.3225	18.82875	19.3675	19.00625	19.0025	18.955	18.93	18.9	19.04	18.48	18.9725	18.58625	18.95625	18.54375	18.4925	18.735	18.58125	18.34875	18.57375	18.23625	18.51375	18.64125	18.61875	18.3125	18.03	18.48375	17.6025	17.62625	17.79125	17.8	18.055	18.24	17.33625
8/11/2019 12:48:49	-118.5147556	42.54336359	1240.321839	8/11/19	0.82556713	0.533900463	8/11/19 12:48	12:49:47	17.72333333	18.16	18.42111111	18.43	18.36888889	18.34777778	17.78888889	17.75222222	18.28666667	17.82888889	18.32555556	18.04444444	17.84444444	17.95222222	17.92	17.87333333	18	17.54	17.95111111	17.57222222	17.86555556	17.45222222	17.41222222	17.71222222	17.49555556	17.32222222	17.48777778	17.23111111	17.42888889	17.56333333	17.55777778	17.27888889	16.82111111	17.20666667	16.41444444	16.41444444	16.6	16.76777778	16.97333333	17.24222222	16.21555556
8/11/2019 12:48:50	-118.5147613	42.54334622	1240.40571	8/11/19	0.825578704	0.533912037	8/11/19 12:48	12:49:48	16.77	17.34375	17.23125	17.34	17.395	17.27875	16.84875	16.81125	17.2825	16.86375	17.28	16.98125	16.83625	16.815	16.9575	16.81875	16.98375	16.43875	16.86375	16.5525	16.89125	16.4575	16.3975	16.605	16.48375	16.27125	16.465	16.1925	16.385	16.56375	16.51375	16.2075	15.975	16.25875	15.27375	15.31125	15.96375	15.91875	15.76125	16.41	15.22375
8/11/2019 12:48:51	-118.5147681	42.54332894	1240.394097	8/11/19	0.825590278	0.533923611	8/11/19 12:48	12:49:49	16.0225	16.46	16.36	16.50875	16.4225	16.41	15.66	15.7825	16.315	15.795	16.4025	15.9225	15.93375	15.85	15.9675	15.80625	15.93125	15.505	15.85125	15.59	15.83	15.46	15.31875	15.7225	15.4975	15.27625	15.535	15.195	15.35	15.53625	15.56875	15.155	14.95125	15.2875	14.39125	14.4175	15.07	14.9075	15.1425	15.495	14.205
8/11/2019 12:48:52	-118.514775	42.54331228	1240.2804	8/11/19	0.825601852	0.533935185	8/11/19 12:48	12:49:50	15.24	16.10111111	15.84888889	15.91444444	15.96666667	15.94333333	15.33	15.27444444	15.80666667	15.52666667	15.83555556	15.46333333	15.50444444	15.35	15.42555556	15.28777778	15.44222222	15.01777778	15.44333333	15.19111111	15.46555556	15.00666667	14.90555556	15.29111111	15.04666667	14.85555556	15.05444444	14.76	15.00333333	15.05888889	15.03666667	14.80444444	14.46888889	14.88777778	13.99333333	13.95777778	14.30666667	14.37222222	14.67666667	14.87111111	13.68555556
8/11/2019 12:48:53	-118.5147798	42.54329553	1240.236677	8/11/19	0.825613426	0.533946759	8/11/19 12:48	12:49:51	15.31125	15.74375	15.78875	15.81125	15.93375	15.71875	15.15375	15.03875	15.735	15.26375	15.65	15.315	15.37625	15.18375	15.3075	15.17	15.285	14.825	15.32625	14.79125	15.26	14.895	14.73	15.08625	14.86	14.76625	14.8475	14.655	14.8025	14.88625	14.89625	14.7125	14.32125	14.61625	13.90125	13.73875	14.43375	14.21625	14.4225	14.55	13.6975
8/11/2019 12:48:54	-118.5147825	42.54327847	1240.223452	8/11/19	0.825625	0.533958333	8/11/19 12:48	12:49:52	15.78875	16.12	16.2625	16.22	16.38	16.17875	15.5575	15.625	16.15125	15.8675	16.04625	15.94125	15.85625	15.8375	15.94875	15.76375	15.8425	15.40125	15.8275	15.5075	15.80875	15.515	15.1925	15.61875	15.45625	15.24625	15.4875	15.1925	15.37625	15.45	15.40125	15.2225	14.905	15.3425	14.35	14.29625	15.0275	14.68375	14.94125	15.1075	14.095
8/11/2019 12:48:55	-118.5147827	42.54326136	1240.308097	8/11/19	0.825636574	0.533969907	8/11/19 12:48	12:49:53	19.62125	20.2525	20.17625	20.37125	20.44375	20.295	19.72625	19.9025	20.15875	19.81	20.3025	20.01375	19.96125	19.8675	19.95125	19.80125	19.975	19.48	19.94375	19.57	19.8275	19.5225	19.4025	19.645	19.515	19.37125	19.63375	19.2975	19.47125	19.62125	19.57625	19.32625	19.13125	19.28	18.23125	18.4	18.79	18.78375	19.12875	19.28875	18.46375
8/11/2019 12:48:56	-118.5147806	42.54324466	1240.2756	8/11/19	0.825648148	0.533981481	8/11/19 12:48	12:49:54	21.89666667	22.47333333	22.66555556	22.73444444	22.72111111	22.62666667	22.03777778	22.01	22.65888889	22.06333333	22.49333333	22.24333333	22.13	22.19666667	22.17888889	22.17666667	22.32	21.74555556	22.24444444	21.86666667	22.15777778	21.71888889	21.66666667	22.01111111	21.82777778	21.64555556	21.86666667	21.60777778	21.70111111	21.98666667	21.81666667	21.60888889	21.27111111	21.46666667	20.37555556	20.51	20.85555556	21.12444444	21.17444444	21.80888889	20.81888889
8/11/2019 12:48:57	-118.5147745	42.5432286	1240.180774	8/11/19	0.825659722	0.533993056	8/11/19 12:48	12:49:55	23.46125	23.8925	23.83625	23.98	24.1325	24.0075	23.32625	23.40375	23.83	23.43375	23.8825	23.5525	23.50125	23.51	23.62875	23.54125	23.56625	22.93875	23.58875	23.09875	23.5625	23.02375	22.9225	23.34	23.2025	22.92375	23.06125	22.8325	23	23.13625	23.14125	22.80375	22.6675	22.6275	21.73875	21.835	22.18375	22.32125	22.13	22.92125	21.93375
8/11/2019 12:48:58	-118.5147644	42.54321404	1240.165129	8/11/19	0.825671296	0.53400463	8/11/19 12:48	12:49:56	19.63625	20.22875	20.26625	20.50375	20.6125	20.36875	19.85375	19.8225	20.465	20.10375	20.395	20.1725	20.065	20.0775	20.0725	20.03125	20.14375	19.60875	20.12125	19.77375	20.155	19.6825	19.5875	19.94875	19.75375	19.57125	19.73875	19.4525	19.6	19.67625	19.79875	19.41	19.18875	19.3275	18.31	18.3075	18.6825	18.7775	18.85125	19.39	18.45625
8/11/2019 12:48:59	-118.5147506	42.5432022	1240.143774	8/11/19	0.82568287	0.534016204	8/11/19 12:48	12:49:57	18.20666667	18.55111111	18.84	18.94888889	19.13222222	18.89	18.34444444	18.27	18.78777778	18.45666667	18.91555556	18.54666667	18.48111111	18.54555556	18.53888889	18.41111111	18.57777778	18.07333333	18.49333333	18.18666667	18.46333333	18.16333333	17.96777778	18.38111111	18.13888889	18.01888889	18.16555556	17.86111111	18.04333333	18.12444444	18.13888889	17.86777778	17.59666667	17.71222222	16.76888889	16.97666667	17.39333333	17.36555556	17.46	17.84777778	17.06
8/11/2019 12:49:00	-118.5147348	42.54319468	1240.245323	8/11/19	0.825694444	0.534027778	8/11/19 12:49	12:49:58	19.50875	20.0525	20.175	20.21	20.2125	20.07875	19.56125	19.53	20.10375	19.61625	20.12875	19.7575	19.73875	19.66625	19.845	19.745	19.84375	19.33	19.88625	19.44	19.78375	19.3325	19.24625	19.51625	19.37625	19.2425	19.41375	19.145	19.3575	19.43125	19.49	19.1725	18.8025	19.1625	18.25125	18.3075	18.5325	18.58	18.7525	19.04875	18.3375
8/11/2019 12:49:01	-118.5147278	42.5431911	1240.322161	8/11/19	0.825706019	0.534039352	8/11/19 12:49	12:49:59	19.50875	20.1425	20.13	20.1375	20.42125	20.21	19.62375	19.51	20.12625	19.6575	20.11625	19.82	19.8825	19.685	19.8175	19.7675	19.885	19.34375	19.91875	19.57125	19.78125	19.42625	19.30375	19.66375	19.5275	19.27875	19.4625	19.28375	19.3975	19.5375	19.4975	19.1925	18.9475	18.9925	18.07375	18.315	18.515	18.74375	18.655	19.26625	18.465
8/11/2019 12:49:02	-118.514726	42.54319472	1240.317	8/11/19	0.825717593	0.534050926	8/11/19 12:49	12:50:00	19.24	19.83	19.625	19.96375	20.08	19.84375	19.2025	19.24125	19.8675	19.36375	19.77375	19.61	19.54125	19.445	19.515	19.40875	19.5375	19.02875	19.535	19.30625	19.51875	19.1325	18.92625	19.3875	19.2125	18.9625	19.13125	18.96625	19.1775	19.20875	19.25125	18.985	18.5125	18.93	17.81	18.08625	17.89	18.33375	18.535	18.765	18.10875
8/11/2019 12:49:03	-118.514724	42.543204	1240.320032	8/11/19	0.825729167	0.5340625	8/11/19 12:49	12:50:01	19.52857143	20.08857143	19.91571429	20.13428571	20.12571429	20.13285714	19.61714286	19.55	20.08428571	19.80285714	20.1	19.76142857	19.80714286	19.73857143	19.74571429	19.78714286	19.89142857	19.41	19.79	19.57	19.76	19.53285714	19.32285714	19.64285714	19.46142857	19.17857143	19.45714286	19.18571429	19.36857143	19.54285714	19.42571429	19.38285714	18.90428571	19.09	17.73285714	18.26428571	18.46571429	18.48142857	18.72571429	19.08571429	18.33571429
8/11/2019 12:49:04	-118.5147209	42.54321718	1240.300839	8/11/19	0.825740741	0.534074074	8/11/19 12:49	12:50:02	20.54428571	21.14428571	21.23857143	21.35571429	21.41285714	21.24	20.89428571	20.78571429	21.34142857	20.82571429	21.34571429	21.09285714	21.04285714	20.99857143	21.07571429	20.89714286	21.08142857	20.58285714	21.06857143	20.63857143	21.01428571	20.56571429	20.46428571	20.76571429	20.55142857	20.37857143	20.68714286	20.41714286	20.52142857	20.56714286	20.72857143	20.41571429	20.07428571	20.07714286	19.2	18.93571429	19.59714286	19.60285714	19.82571429	20.16571429	19.44857143
8/11/2019 12:49:05	-118.5147168	42.54323286	1240.206387	8/11/19	0.825752315	0.534085648	8/11/19 12:49	12:50:03	21.80125	22.04125	22.185	22.19	22.39125	22.2075	21.5075	21.5725	22.1125	21.695	22.12625	21.76875	21.80375	21.79375	21.76	21.7375	21.89	21.30125	21.80375	21.4325	21.7675	21.38	21.29	21.54875	21.435	21.17	21.31625	21.12375	21.23	21.34125	21.35875	21.1	20.67	20.82875	19.8075	20.1125	20.0875	20.7075	20.46	21.36625	20.33625
8/11/2019 12:49:06	-118.5147119	42.54324924	1240.0892	8/11/19	0.825763889	0.534097222	8/11/19 12:49	12:50:04	16.36428571	16.87	16.82571429	16.85857143	17.16857143	16.89142857	16.31857143	16.27	16.90571429	16.46142857	16.94142857	16.55714286	16.48571429	16.48428571	16.45142857	16.45	16.53142857	16.03857143	16.50714286	16.21142857	16.43857143	16.12857143	15.94	16.36857143	16.12285714	15.92285714	16.12142857	15.83142857	16.03714286	16.13714286	16.3	15.92	15.64142857	15.88857143	15.11428571	15.05142857	15.45714286	15.55428571	15.60571429	16.07857143	14.85
8/11/2019 12:49:07	-118.5147065	42.54326555	1240.019871	8/11/19	0.825775463	0.534108796	8/11/19 12:49	12:50:05	17.40714286	18.12714286	18.29	18.13714286	18.34428571	18.13714286	17.49	17.46857143	17.97714286	17.61857143	18.14142857	17.74142857	17.65428571	17.70428571	17.70857143	17.66571429	17.77857143	17.35285714	17.68	17.49428571	17.68857143	17.30142857	17.24428571	17.50571429	17.44285714	17.20571429	17.33714286	17.14142857	17.37142857	17.54142857	17.38857143	17.22	16.89571429	17.09	16.21142857	16.33	16.64714286	16.54857143	16.87428571	17.17	16.31714286
8/11/2019 12:49:08	-118.5147009	42.543283	1240.019323	8/11/19	0.825787037	0.53412037	8/11/19 12:49	12:50:06	15.6825	16.18375	15.9575	16.2475	16.3775	16.12375	15.595	15.61625	16.0875	15.71125	16.075	15.79125	15.6525	15.55875	15.69	15.61	15.76375	15.18125	15.6675	15.32	15.62625	15.25875	15.1325	15.34	15.205	15.045	15.22625	15.05	15.18625	15.32	15.24	15.015	14.6875	15.24625	14.12625	14.2975	14.62875	14.75125	14.70875	15.07375	14
8/11/2019 12:49:09	-118.5146957	42.54330018	1239.974355	8/11/19	0.825798611	0.534131944	8/11/19 12:49	12:50:07	14.53857143	15.05714286	15.05714286	15.19285714	15.29142857	14.95857143	14.40285714	14.35857143	14.93857143	14.61142857	14.86428571	14.49571429	14.54428571	14.49857143	14.56857143	14.41714286	14.56714286	14.10857143	14.59714286	14.18285714	14.56	14.10285714	13.98285714	14.25857143	14.09428571	13.92428571	14.14857143	13.94428571	14.03714286	14.24571429	14.29571429	14.02428571	13.53571429	13.99285714	13.13285714	13.23285714	13.56714286	13.51571429	13.67571429	14.17	12.86
8/11/2019 12:49:10	-118.5146906	42.54331626	1239.944	8/11/19	0.825810185	0.534143519	8/11/19 12:49	12:50:08	15.24714286	15.82285714	16.01571429	16.02571429	15.94571429	15.86857143	15.21	15.18857143	15.83142857	15.30142857	15.74428571	15.56428571	15.33	15.43142857	15.41857143	15.30142857	15.54571429	14.98428571	15.42428571	15.06142857	15.36428571	15.03714286	14.84571429	15.21714286	15.03142857	14.77	15.02714286	14.75428571	14.89571429	15.12571429	15.05142857	14.76571429	14.37428571	14.97857143	14.07285714	14.14857143	14.66	14.33142857	14.43	14.88428571	13.91285714
8/11/2019 12:49:11	-118.5146862	42.54333192	1239.902065	8/11/19	0.825821759	0.534155093	8/11/19 12:49	12:50:09	16.05	16.46444444	16.40777778	16.46	16.79111111	16.55444444	15.77333333	15.90222222	16.43555556	15.95888889	16.32666667	16.03	15.96111111	15.96222222	15.92888889	15.90333333	16.00222222	15.56111111	15.97222222	15.59777778	15.95	15.53111111	15.37	15.69888889	15.53555556	15.38	15.62333333	15.26666667	15.46222222	15.57111111	15.55555556	15.36444444	14.96777778	15.33777778	14.56888889	14.74222222	15.14666667	15.03666667	15.13666667	15.62555556	14.42222222
8/11/2019 12:49:12	-118.514682	42.54334641	1239.86796	8/11/19	0.825833333	0.534166667	8/11/19 12:49	12:50:10	15.48333333	16.12222222	15.96888889	16.03777778	16.24666667	15.88777778	15.38444444	15.18444444	15.83222222	15.41222222	15.79111111	15.51222222	15.39777778	15.35777778	15.45333333	15.22	15.39222222	14.89555556	15.42111111	15.05555556	15.31	14.91333333	14.81	15.12333333	14.91888889	14.7	14.96333333	14.65444444	14.89222222	14.91888889	14.94888889	14.76222222	14.28	14.90333333	14.13111111	14.00666667	14.58333333	14.29666667	14.59	14.91666667	13.69111111
8/11/2019 12:49:13	-118.5146777	42.54336271	1239.860459	8/11/19	0.825844907	0.534178241	8/11/19 12:49	12:50:11	15.73714286	16.26	16.01	16.26571429	16.27142857	16.14142857	15.52571429	15.45428571	16.13428571	15.75571429	16.13285714	15.71428571	15.71285714	15.63142857	15.66285714	15.53285714	15.70714286	15.21714286	15.61571429	15.23	15.6	15.19714286	14.95857143	15.35285714	15.15428571	15.01571429	15.12428571	14.95571429	15	15.20571429	15.12142857	14.86	14.69428571	15.23857143	14.28571429	14.58285714	14.69857143	14.53428571	14.62714286	14.93285714	13.95571429
8/11/2019 12:49:14	-118.5146728	42.54338049	1239.886548	8/11/19	0.825856481	0.534189815	8/11/19 12:49	12:50:12	16.0925	16.4625	16.71625	16.55	16.6075	16.64625	15.9725	15.88875	16.495	16.06375	16.45375	16.0875	16.05	16.04875	16.05	16.02	16.06625	15.62875	15.97	15.69375	15.95375	15.555	15.46625	15.72	15.5625	15.34375	15.58875	15.21375	15.39375	15.5075	15.475	15.30625	14.77	15.41125	14.205	14.6675	14.99125	15.01625	14.9025	15.4225	14.21
8/11/2019 12:49:15	-118.5146681	42.54339656	1239.8436	8/11/19	0.825868056	0.534201389	8/11/19 12:49	12:50:13	16.06777778	16.40222222	16.40555556	16.48666667	16.52888889	16.42777778	15.79444444	15.79444444	16.34888889	15.95333333	16.4	16.08555556	15.86555556	15.83666667	15.93	15.80888889	15.94666667	15.38222222	15.87	15.41888889	15.79888889	15.38111111	15.25333333	15.55333333	15.36222222	15.21777778	15.41111111	15.17333333	15.30111111	15.45888889	15.35777778	15.10111111	14.92444444	15.26666667	14.34222222	14.34666667	14.77777778	14.74222222	14.95666667	15.20111111	14.03444444
8/11/2019 12:49:16	-118.5146633	42.54341268	1239.843935	8/11/19	0.82587963	0.534212963	8/11/19 12:49	12:50:14	17.24777778	17.79888889	17.60555556	17.77111111	17.80666667	17.62888889	17.00888889	17.01333333	17.55666667	17.15666667	17.51666667	17.18555556	17.07666667	17.08333333	17.14111111	17.01444444	17.13222222	16.60555556	17.02555556	16.69333333	16.98666667	16.56444444	16.43666667	16.77	16.58888889	16.47111111	16.51333333	16.23444444	16.58444444	16.58444444	16.65	16.35777778	16.06444444	16.34222222	15.52777778	15.58555556	16.09888889	15.93888889	15.93444444	16.41555556	15.37
8/11/2019 12:49:17	-118.5146585	42.5434285	1239.883742	8/11/19	0.825891204	0.534224537	8/11/19 12:49	12:50:15	17.97666667	18.55166667	18.73	18.69666667	18.68	18.61166667	17.845	17.91833333	18.44833333	18.03333333	18.405	18.00666667	18.04	17.955	17.90666667	17.81166667	18.04833333	17.55	17.93166667	17.575	17.85666667	17.395	17.26333333	17.51	17.47833333	17.27833333	17.45166667	17.14666667	17.25	17.45166667	17.42666667	17.32666667	16.81833333	17.36166667	16.64	16.74166667	16.73666667	16.88833333	16.87	17.31833333	16.16833333
8/11/2019 12:49:18	-118.5146536	42.54344408	1239.88329	8/11/19	0.825902778	0.534236111	8/11/19 12:49	12:50:16	18.16333333	18.69555556	18.73111111	18.73	18.82777778	18.63777778	18.01888889	17.97888889	18.51888889	18.07333333	18.42555556	18.13222222	18.04222222	18.02222222	18.07555556	17.95777778	18.07555556	17.6	18.06	17.6	17.99888889	17.54666667	17.33777778	17.75333333	17.49777778	17.25333333	17.45333333	17.15666667	17.32666667	17.60555556	17.55	17.42555556	16.89555556	17.20555556	16.61333333	16.56222222	16.64555556	16.77222222	16.97333333	17.34444444	16.37444444
8/11/2019 12:49:19	-118.5146494	42.54345823	1239.8565	8/11/19	0.825914352	0.534247685	8/11/19 12:49	12:50:17	17.9925	18.5375	18.32375	18.6075	18.4525	18.3175	17.77125	17.74125	18.28125	17.76375	18.165	17.84125	17.7425	17.64875	17.8225	17.72625	17.8825	17.11875	17.69	17.37375	17.71375	17.2875	17.07875	17.475	17.26	16.9675	17.28375	16.925	17.08625	17.32125	17.23125	17.1225	16.67875	17.30375	16.54625	16.72625	16.67875	16.705	16.56875	17.20125	15.9525
8/11/2019 12:49:20	-118.5146445	42.54347267	1239.804677	8/11/19	0.825925926	0.534259259	8/11/19 12:49	12:50:18	19.09875	19.675	19.495	19.63125	19.56875	19.365	18.7575	18.78	19.44625	18.9025	19.30125	18.9525	18.895	18.885	19.00375	18.80875	18.97125	18.40375	18.8275	18.48875	18.80625	18.34375	18.145	18.52125	18.2975	18.18625	18.4025	18.0675	18.215	18.46125	18.4375	18.25875	17.755	18.20375	17.26125	17.33125	17.845	17.58	17.785	17.92125	17.025
8/11/2019 12:49:21	-118.5146384	42.54349082	1239.766108	8/11/19	0.8259375	0.534270833	8/11/19 12:49	12:50:19	21.88625	22.64625	22.54875	22.665	22.6025	22.4525	21.90125	21.7875	22.47	21.8875	22.24375	21.9575	21.88625	21.91375	21.93	21.79875	21.8975	21.3525	21.78875	21.37	21.7225	21.33875	21.1275	21.44	21.30625	21.06125	21.235	21.04625	21.16125	21.27875	21.235	20.895	20.58125	21.1325	20.0825	20.10375	20.47	20.2875	20.385	20.55875	19.60375
8/11/2019 12:49:22	-118.5146324	42.54350901	1239.747452	8/11/19	0.825949074	0.534282407	8/11/19 12:49	12:50:20	23.70777778	24.22888889	23.96555556	24.14222222	24.40111111	24.17	23.39666667	23.37555556	24	23.47555556	23.90444444	23.65666667	23.42555556	23.45	23.50888889	23.32222222	23.53333333	22.87111111	23.37111111	23.02666667	23.40555556	22.93	22.76	23.05111111	22.90333333	22.61222222	22.89	22.55222222	22.60555556	22.89777778	22.83111111	22.55666667	22.24333333	22.56	21.62222222	21.74888889	21.72	21.91222222	21.92333333	22.25444444	21.18333333
8/11/2019 12:49:23	-118.5146265	42.54352584	1239.7196	8/11/19	0.825960648	0.534293981	8/11/19 12:49	12:50:21	24.52625	25.12125	25.06625	25.2275	25.07375	24.90625	24.38125	24.22	24.72625	24.2825	24.59875	24.4	24.275	24.315	24.3075	24.14125	24.2775	23.76625	24.2075	23.79	24.18625	23.71375	23.6125	23.90125	23.74	23.52875	23.6425	23.35	23.44625	23.75875	23.6975	23.3475	23.02875	23.34125	22.4625	22.79375	22.9325	22.77	22.8275	23.285	22.18625
8/11/2019 12:49:24	-118.5146201	42.54354356	1239.652781	8/11/19	0.825972222	0.534305556	8/11/19 12:49	12:50:22	24.47555556	24.80111111	24.62555556	24.90222222	24.91555556	24.77444444	24.03777778	23.96666667	24.59555556	24.05222222	24.5	24.13222222	24.11444444	24.03777778	24.08444444	23.91888889	23.96444444	23.55444444	23.96555556	23.6	23.87777778	23.49333333	23.25222222	23.57555556	23.42666667	23.24111111	23.40333333	23.1	23.29888889	23.43888889	23.43888889	23.19444444	22.77777778	23.10222222	22.38777778	22.22222222	22.38	22.63333333	22.77	23.21111111	21.94555556
8/11/2019 12:49:25	-118.5146142	42.54356126	1239.61	8/11/19	0.825983796	0.53431713	8/11/19 12:49	12:50:23	24.09875	24.935	24.6225	24.76	24.83125	24.5575	23.91375	23.835	24.37	23.83625	24.2875	24.05125	23.89	23.895	23.91875	23.82	23.9975	23.40125	23.8475	23.3475	23.7875	23.38375	23.18375	23.55375	23.33875	23.20625	23.23	23.065	23.1125	23.31875	23.315	23.01	22.68125	23.16375	22.355	22.7475	22.5425	22.5375	22.7975	23.0825	21.995
8/11/2019 12:49:26	-118.5146082	42.54357859	1239.56629	8/11/19	0.82599537	0.534328704	8/11/19 12:49	12:50:24	25.0225	25.7625	25.60625	25.63125	25.63625	25.41125	24.8025	24.76	25.3825	24.81875	25.1975	24.96875	24.82625	24.80875	24.80875	24.7025	24.85125	24.26125	24.73	24.3075	24.7	24.14625	23.98625	24.33375	24.19375	23.91625	24.1425	23.85	24.0125	24.07	24.09125	23.83625	23.45875	23.80875	23.1475	23.325	23.56	23.48875	23.345	23.93875	22.8725
8/11/2019 12:49:27	-118.514602	42.5435962	1239.490032	8/11/19	0.826006944	0.534340278	8/11/19 12:49	12:50:25	24.57555556	24.96555556	24.98333333	25.04111111	24.97888889	24.80555556	24.04444444	24.05777778	24.68111111	24.08222222	24.62111111	24.26333333	24.18555556	24.12222222	24.14777778	24.03	24.20333333	23.59222222	24.02888889	23.65777778	24.00111111	23.48333333	23.4	23.65444444	23.55222222	23.29666667	23.50555556	23.21444444	23.36444444	23.64	23.51111111	23.14666667	22.76888889	23.29555556	22.51888889	22.90111111	22.92222222	22.90888889	22.87666667	23.35222222	22.21
8/11/2019 12:49:28	-118.5145957	42.54361392	1239.4188	8/11/19	0.826018519	0.534351852	8/11/19 12:49	12:50:26	25.07125	25.675	25.52	25.74625	25.5225	25.58	24.9225	24.74625	25.2525	24.88875	25.1775	24.91875	24.7625	24.825	24.75375	24.65875	24.79	24.21625	24.69875	24.29875	24.57875	24.15375	24.04625	24.3375	24.16	23.97875	24.07875	23.88	23.9625	24.0275	24.05125	23.66625	23.43375	23.7	23.0625	23.24125	23.2425	23.3825	23.24	23.7425	22.65125
8/11/2019 12:49:29	-118.5145892	42.54363159	1239.430548	8/11/19	0.826030093	0.534363426	8/11/19 12:49	12:50:27	23.305	24.02625	23.875	23.99375	24.05125	23.8525	23.19375	23.07	23.66125	23.30375	23.63375	23.27625	23.19625	23.14125	23.11375	23.0675	23.14875	22.51	23.08625	22.655	22.97625	22.57125	22.34	22.69125	22.5625	22.32	22.4375	22.1925	22.30125	22.4475	22.3625	22.21125	21.7925	22.22875	21.1975	21.6875	21.67	21.87125	21.6425	22.29	21.325
8/11/2019 12:49:30	-118.5145822	42.54365034	1239.439097	8/11/19	0.826041667	0.534375	8/11/19 12:49	12:50:28	20.09555556	20.80666667	20.84555556	20.76666667	20.84111111	20.66222222	20.02444444	20.06888889	20.49	20.03777778	20.41444444	20.10444444	20.03	20	20.04444444	19.92888889	19.98	19.49888889	19.98222222	19.56333333	19.87111111	19.39444444	19.34444444	19.60333333	19.41444444	19.21	19.34333333	19.12111111	19.35666667	19.41666667	19.40222222	19.18	18.82444444	19.00111111	18.46777778	18.35777778	18.76555556	18.85	18.64666667	19.21222222	18.23222222
8/11/2019 12:49:31	-118.5145749	42.5436699	1239.363323	8/11/19	0.826053241	0.534386574	8/11/19 12:49	12:50:29	17.94875	18.395	18.34375	18.69125	18.5575	18.36375	17.8075	17.64125	18.26875	17.76875	18.16125	17.83875	17.775	17.74	17.84875	17.60125	17.75625	17.26375	17.71375	17.2775	17.635	17.07375	16.9575	17.38625	17.15	17.0775	17.155	16.81125	17.04	17.22375	17.24625	17.04125	16.6375	17.24125	16.18375	16.43875	16.67	16.48625	16.6825	17.15125	15.9825
8/11/2019 12:49:32	-118.5145671	42.54368943	1239.269	8/11/19	0.826064815	0.534398148	8/11/19 12:49	12:50:30	19.23375	19.64625	19.83875	19.73875	19.87375	19.78	19.07	19.04	19.55625	19.16625	19.51	19.145	19.0225	19.06	19.06125	19.0525	19.05875	18.57	19.03375	18.6425	18.91125	18.53	18.345	18.72875	18.44	18.19875	18.53125	18.12375	18.29375	18.62875	18.6025	18.30375	18.02625	18.2825	17.615	17.38625	18.075	18.03	18.145	18.43125	17.1075
8/11/2019 12:49:33	-118.5145593	42.54370854	1239.2254	8/11/19	0.826076389	0.534409722	8/11/19 12:49	12:50:31	21.16777778	21.50222222	21.34111111	21.63333333	21.66	21.45555556	20.81	20.78333333	21.35777778	20.84666667	21.19666667	20.93666667	20.81777778	20.72888889	20.79444444	20.67555556	20.88555556	20.31555556	20.65666667	20.27777778	20.65222222	20.16222222	20.11444444	20.36666667	20.27222222	20.00555556	20.19111111	19.78777778	20.09777778	20.25666667	20.2	19.97555556	19.70555556	20.31888889	19.11444444	19.58111111	19.74111111	19.63555556	19.60666667	20.13555556	19.02
8/11/2019 12:49:34	-118.5145513	42.54372757	1239.207742	8/11/19	0.826087963	0.534421296	8/11/19 12:49	12:50:32	21.5425	21.985	21.95625	22.13625	22.055	21.91125	21.245	21.20375	21.835	21.3175	21.77875	21.3525	21.33625	21.27125	21.34125	21.26	21.40625	20.79375	21.33	20.81125	21.175	20.70375	20.555	20.8275	20.7075	20.55625	20.66375	20.42125	20.5975	20.7425	20.75625	20.46	20.13125	20.53125	19.71	19.8625	19.85	19.89875	19.9525	20.6775	19.42125
8/11/2019 12:49:35	-118.5145435	42.54374725	1239.143613	8/11/19	0.826099537	0.53443287	8/11/19 12:49	12:50:33	21.14	21.9025	21.61	21.7675	21.94125	21.61	20.98625	20.87375	21.4525	20.9925	21.4075	21.06875	20.98125	20.92	21.01375	20.8425	20.97875	20.49875	20.95375	20.47	20.88375	20.4	20.2775	20.5975	20.40875	20.2325	20.37875	20.22	20.3175	20.49375	20.4225	20.1775	19.78625	20.15875	19.28875	19.40625	19.69125	19.70625	19.675	20.31125	18.98875
8/11/2019 12:49:36	-118.5145354	42.54376712	1239.091065	8/11/19	0.826111111	0.534444444	8/11/19 12:49	12:50:34	19.51285714	19.86142857	19.96857143	19.98714286	20.03	19.97714286	19.23285714	19.10571429	19.75	19.27571429	19.74142857	19.30428571	19.22428571	19.19428571	19.19857143	19.16142857	19.23428571	18.71285714	19.22857143	18.81428571	19.12285714	18.70142857	18.52857143	18.86428571	18.62571429	18.44571429	18.62428571	18.43857143	18.62714286	18.80285714	18.75714286	18.51285714	17.89857143	18.37714286	17.71142857	17.73285714	17.76	18.16428571	17.87714286	18.53	17.49285714
8/11/2019 12:49:37	-118.5145276	42.54378766	1239.060226	8/11/19	0.826122685	0.534456019	8/11/19 12:49	12:50:35	16.015	16.68625	16.59875	17.025	16.88375	16.65	15.99	15.9625	16.65125	16.03375	16.565	16.1725	16.155	15.99875	16.11625	16.025	16.2	15.60125	15.97625	15.7175	16.00625	15.615	15.425	15.76375	15.6175	15.43875	15.6225	15.29	15.50125	15.66375	15.57375	15.28875	14.98375	15.51875	14.75375	14.65	15.17625	15.1275	15.02375	15.34875	14.38625
8/11/2019 12:49:38	-118.5145196	42.54380786	1239.0686	8/11/19	0.826134259	0.534467593	8/11/19 12:49	12:50:36	15.0625	15.735	15.63125	15.79125	15.79	15.5775	15.01125	14.89375	15.53375	14.98	15.5175	15.08125	15.0975	14.98875	15.125	15.0925	15.21	14.5825	15.1025	14.67125	15.06	14.65125	14.50875	14.98125	14.6975	14.48875	14.74	14.40375	14.72625	14.795	14.7975	14.55625	14.19125	14.68875	13.49875	13.81375	13.95875	14.0975	14.1825	14.64625	13.56
8/11/2019 12:49:39	-118.514512	42.54382757	1239.117323	8/11/19	0.826145833	0.534479167	8/11/19 12:49	12:50:37	14.78777778	15.62333333	15.68666667	15.71777778	15.77333333	15.6	14.94444444	14.90666667	15.55888889	15.02111111	15.51666667	15.17777778	15.07777778	15.08555556	15.07555556	15.04888889	15.19333333	14.59777778	15.17333333	14.75444444	15.11	14.64555556	14.57	14.91888889	14.73777778	14.55555556	14.84444444	14.46	14.69	14.82222222	14.84333333	14.49555556	14.31111111	14.71333333	13.89777778	13.99777778	14.13333333	14.29555556	14.52333333	14.76666667	13.61777778
8/11/2019 12:49:40	-118.5145063	42.54383932	1239.141742	8/11/19	0.826157407	0.534490741	8/11/19 12:49	12:50:38	15.59875	16.26125	16.2125	16.345	16.2775	16.22	15.6	15.5925	16.09	15.7575	16.1725	15.7975	15.63875	15.76625	15.73875	15.71625	15.84625	15.2625	15.75625	15.395	15.68625	15.30375	15.21	15.55	15.4275	15.11375	15.4925	15.13875	15.26375	15.4175	15.515	15.2525	14.80625	15.31875	14.155	14.4925	14.78125	14.74375	14.6475	15.46	14.235
8/11/2019 12:49:41	-118.5145051	42.5438388	1239.1272	8/11/19	0.826168981	0.534502315	8/11/19 12:49	12:50:39	15.07	15.57875	15.575	15.715	15.6875	15.61375	14.95625	14.97875	15.46	15.0325	15.48375	15.14125	15.15875	15.05875	15.07875	15.015	15.12875	14.58625	15.07375	14.785	15.0875	14.69125	14.4775	14.8025	14.77	14.5575	14.67625	14.48375	14.655	14.855	14.80125	14.6	14.03125	14.70375	13.41125	13.99	14.22125	14.045	14.1675	14.565	13.64875
8/11/2019 12:49:42	-118.5145067	42.54383782	1239.047355	8/11/19	0.826180556	0.534513889	8/11/19 12:49	12:50:40	14.885	15.3525	15.4875	15.74375	15.7125	15.375	14.7825	14.745	15.2775	14.9125	15.3575	15.01	14.95375	14.91	14.96125	14.88375	15.0325	14.475	15.07	14.58125	14.9225	14.5	14.40125	14.76875	14.62625	14.47	14.625	14.3825	14.61375	14.6725	14.7625	14.2525	14.06875	14.4925	13.51875	13.6925	13.99375	14.14375	14.19	14.57875	13.50125
8/11/2019 12:49:43	-118.5145073	42.54383758	1239.065645	8/11/19	0.82619213	0.534525463	8/11/19 12:49	12:50:41	14.6875	15.2	15.34	15.40625	15.51875	15.305	14.67	14.6375	15.3125	14.75625	15.18375	14.885	14.85375	14.81	14.9175	14.83	14.97375	14.3525	14.8825	14.5125	14.94125	14.4675	14.31	14.74875	14.5725	14.3125	14.63875	14.105	14.49125	14.64625	14.675	14.39875	13.975	14.6875	13.65625	13.7	13.975	14.0125	14.19	14.52625	13.35
8/11/2019 12:49:44	-118.5144982	42.54383605	1239.042452	8/11/19	0.826203704	0.534537037	8/11/19 12:49	12:50:42	14.86375	15.33625	15.4125	15.5625	15.64375	15.3275	14.9625	14.82125	15.32375	14.8675	15.36125	14.96	14.86375	14.83875	14.93625	14.855	14.9975	14.44375	14.88625	14.5725	14.935	14.53875	14.4275	14.78875	14.50875	14.3675	14.535	14.2775	14.495	14.71	14.6425	14.4125	13.995	14.555	13.46875	13.9625	13.85	14.05625	14.1225	14.38875	13.44
8/11/2019 12:49:45	-118.5144755	42.54383212	1239.050516	8/11/19	0.826215278	0.534548611	8/11/19 12:49	12:50:43	14.92555556	15.57333333	15.41	15.67333333	15.67666667	15.47222222	14.84666667	14.80111111	15.42777778	15.02111111	15.53333333	15.06222222	15.03777778	15.03444444	14.99	14.94333333	15.06777778	14.55888889	15.12444444	14.7	15.02222222	14.62	14.47555556	14.86	14.67666667	14.53222222	14.65111111	14.44777778	14.57555556	14.82444444	14.70888889	14.59333333	14.20555556	14.38888889	13.33	13.68444444	14.15888889	14.15111111	14.19666667	14.59222222	13.40666667
8/11/2019 12:49:46	-118.5144437	42.54382636	1239.002548	8/11/19	0.826226852	0.534560185	8/11/19 12:49	12:50:44	14.83625	15.4575	15.43125	15.39	15.52	15.47375	14.84125	14.84125	15.3025	15.01375	15.37375	15.01625	14.91875	14.99625	14.93375	14.93875	15.11625	14.54875	15.05125	14.68875	15.03125	14.56	14.41625	14.8675	14.71625	14.42125	14.66625	14.405	14.58	14.73875	14.64125	14.3875	14.05125	14.47625	13.35125	13.42	14.03625	13.95125	13.965	14.55625	13.41
8/11/2019 12:49:47	-118.5144284	42.54382204	1238.9402	8/11/19	0.826238426	0.534571759	8/11/19 12:49	12:50:45	14.83625	15.345	15.4375	15.54875	15.745	15.52	14.90125	14.885	15.38625	14.96	15.44625	15.15125	15.075	15.005	15.02125	15.015	15.11	14.6125	15.17625	14.71375	15.04	14.6875	14.5575	14.8975	14.6875	14.55125	14.70625	14.475	14.63875	14.855	14.825	14.65875	14.195	14.68	13.37	13.765	14.0375	14.06375	14.07	14.5925	13.615
8/11/2019 12:49:48	-118.5144275	42.54382057	1238.917258	8/11/19	0.82625	0.534583333	8/11/19 12:49	12:50:46	14.765	15.4075	15.465	15.6325	15.52375	15.46625	14.77625	14.66125	15.38625	14.8825	15.295	14.99625	14.91875	14.88625	14.96625	14.91	15.08625	14.52875	14.98875	14.65625	15.00875	14.59625	14.41875	14.82875	14.5825	14.44125	14.62375	14.41625	14.6125	14.815	14.74375	14.425	14.0425	14.6225	13.66375	13.66375	14.12375	14.05125	14.055	14.395	13.51875
8/11/2019 12:49:49	-118.5144257	42.5438159	1238.99616	8/11/19	0.826261574	0.534594907	8/11/19 12:49	12:50:47	14.89444444	15.52333333	15.38666667	15.58888889	15.64666667	15.33666667	14.75777778	14.79444444	15.33	14.85444444	15.33333333	15.00444444	14.86111111	14.92111111	14.97222222	14.92333333	15.01777778	14.48555556	14.95222222	14.57111111	14.95222222	14.55555556	14.37333333	14.83111111	14.63555556	14.34222222	14.60777778	14.36111111	14.43	14.79777778	14.77444444	14.40666667	14.09555556	14.71444444	13.74111111	13.62777778	13.99222222	14.05666667	14.17	14.72222222	13.37
8/11/2019 12:49:50	-118.5144209	42.54380319	1239.092324	8/11/19	0.826273148	0.534606481	8/11/19 12:49	12:50:48	15.52666667	16.26222222	16.17222222	16.33222222	16.36111111	16.27222222	15.59666667	15.59555556	16.27555556	15.77222222	16.23222222	15.91222222	15.87111111	15.87333333	15.86777778	15.79444444	15.92222222	15.36222222	15.87666667	15.42333333	15.78333333	15.45666667	15.32666667	15.68444444	15.51111111	15.27	15.51777778	15.27	15.35	15.66111111	15.55555556	15.31333333	14.94555556	15.14555556	14.29777778	14.50222222	14.73777778	14.90111111	15.03666667	15.26555556	14.33
8/11/2019 12:49:51	-118.5144136	42.54378428	1239.1402	8/11/19	0.826284722	0.534618056	8/11/19 12:49	12:50:49	15.7025	16.34125	16.30875	16.26625	16.355	16.31125	15.62375	15.58875	16.2625	15.57125	16.18625	15.81	15.70125	15.68625	15.75125	15.745	15.74375	15.26875	15.795	15.37875	15.66125	15.29875	15.0875	15.5125	15.405	15.1075	15.38625	15.06	15.26125	15.5575	15.41	15.1675	14.73	15.1225	14.145	14.35125	14.63875	14.645	14.775	15.305	14
8/11/2019 12:49:52	-118.5144061	42.54376378	1239.206581	8/11/19	0.826296296	0.53462963	8/11/19 12:49	12:50:50	18.0775	18.60625	18.46625	18.63875	18.76625	18.59	17.8575	17.85875	18.51625	18.0625	18.49625	18.0975	18.045	17.95375	18.0275	17.93375	18.11125	17.58375	18.08875	17.5525	17.965	17.49125	17.32875	17.75375	17.5925	17.34375	17.6025	17.2275	17.42625	17.6425	17.54125	17.355	16.96625	17.26375	16.53375	16.725	16.52875	16.6175	16.965	17.26875	15.885
8/11/2019 12:49:53	-118.5143983	42.54374026	1239.262935	8/11/19	0.82630787	0.534641204	8/11/19 12:49	12:50:51	20.63285714	20.96571429	21.03	21.01714286	21.03285714	21.06857143	20.30857143	20.18428571	20.93	20.40857143	20.92285714	20.42857143	20.39	20.36142857	20.39428571	20.36	20.43	19.87857143	20.35285714	19.89714286	20.23	19.79	19.74857143	20.12428571	19.92	19.69571429	19.84857143	19.54714286	19.77285714	19.79428571	19.87	19.62285714	19.26428571	19.74714286	18.88857143	18.66	19.15142857	19.11285714	19.26571429	19.61	18.43857143
8/11/2019 12:49:54	-118.5143934	42.54371625	1239.198581	8/11/19	0.826319444	0.534652778	8/11/19 12:49	12:50:52	20.14666667	20.82555556	20.57	20.82666667	20.86333333	20.71	20.02111111	20.02555556	20.67	20.05222222	20.50222222	20.09555556	20.07	20.09111111	20.06	20.00888889	20.15444444	19.55222222	20.06111111	19.60333333	19.94555556	19.49555556	19.38555556	19.68666667	19.48222222	19.29888889	19.50111111	19.22	19.32444444	19.48777778	19.50777778	19.17333333	18.92555556	19.28222222	18.34666667	18.44888889	18.50666667	18.74333333	18.79333333	19.25666667	17.99222222
8/11/2019 12:49:55	-118.5143905	42.54369215	1239.2256	8/11/19	0.826331019	0.534664352	8/11/19 12:49	12:50:53	19.7975	20.4925	20.45	20.5175	20.48125	20.35625	19.62125	19.67	20.31125	19.7375	20.14125	19.77125	19.6975	19.71	19.7525	19.66125	19.795	19.2225	19.68625	19.3125	19.59375	19.09375	19.0175	19.34	19.20625	19.0075	19.10625	18.94	19.0525	19.15875	19.16375	18.85125	18.47625	18.84125	17.9375	18.16	18.40875	18.36	18.445	18.99	17.71125
8/11/2019 12:49:56	-118.5143906	42.54366679	1239.343548	8/11/19	0.826342593	0.534675926	8/11/19 12:49	12:50:54	18.04428571	18.73	18.80142857	18.98285714	18.98857143	18.78571429	17.98714286	18.05	18.65857143	18.24428571	18.63142857	18.20428571	18.17428571	18.13571429	18.18	18.07857143	18.21857143	17.61	18.15714286	17.72571429	18.13714286	17.72857143	17.49571429	17.86142857	17.70142857	17.43714286	17.58285714	17.29857143	17.56857143	17.63857143	17.59142857	17.31714286	16.94714286	17.19571429	16.26571429	16.32571429	16.66	16.76	16.78714286	17.41	16.16428571
8/11/2019 12:49:57	-118.5143926	42.54364355	1239.41104	8/11/19	0.826354167	0.5346875	8/11/19 12:49	12:50:55	16.24333333	16.50111111	16.65222222	16.92111111	17.00666667	16.89111111	16.15444444	16.18888889	16.71555556	16.29222222	16.67777778	16.31555556	16.31777778	16.24222222	16.35333333	16.23444444	16.33111111	15.78555556	16.31444444	15.87777778	16.21222222	15.79333333	15.56	15.96111111	15.84	15.57444444	15.74	15.54	15.69777778	15.82333333	15.91777778	15.56	15.15	15.53111111	14.54222222	14.81	15.09111111	15.10222222	15.14555556	15.64444444	14.46333333
8/11/2019 12:49:58	-118.5143961	42.54361862	1239.529649	8/11/19	0.826365741	0.534699074	8/11/19 12:49	12:50:56	15.0825	15.72625	15.79625	15.78	16.00375	15.93625	15.12375	15.05125	15.79875	15.29125	15.74125	15.3675	15.2425	15.21625	15.24375	15.23125	15.40625	14.77875	15.315	14.82375	15.1775	14.725	14.58	15.07375	14.7275	14.63875	14.88625	14.51375	14.64625	14.81625	14.875	14.49125	14.175	14.50875	13.79375	14	14.1075	14.20125	14.16	14.63625	13.60875
8/11/2019 12:49:59	-118.5144012	42.54359132	1239.530323	8/11/19	0.826377315	0.534710648	8/11/19 12:49	12:50:57	15.59125	16.14125	16.1525	16.14	16.445	16.095	15.485	15.3875	16.0875	15.665	16.0525	15.615	15.5775	15.54125	15.6075	15.53375	15.735	15.11	15.665	15.29625	15.53	15.1525	14.98625	15.4225	15.17125	15.0275	15.1825	14.87125	14.9875	15.21125	15.26125	14.91	14.54	14.975	13.92125	14.4	14.48875	14.5725	14.565	15.23875	13.8125
8/11/2019 12:50:00	-118.5144065	42.54356694	1239.5088	8/11/19	0.826388889	0.534722222	8/11/19 12:50	12:50:58	16.01285714	16.65	16.77285714	16.83714286	16.92285714	16.77714286	16.12857143	16.05857143	16.66714286	16.19571429	16.53857143	16.31571429	16.15714286	16.05285714	16.13142857	16.09142857	16.28285714	15.64571429	16.21428571	15.77	16.11428571	15.57285714	15.52142857	15.83	15.70714286	15.47571429	15.70714286	15.34142857	15.45142857	15.69714286	15.75428571	15.32142857	15.06142857	15.45857143	14.66571429	14.51857143	15.05285714	14.87285714	14.97	15.49857143	14.37142857
8/11/2019 12:50:01	-118.5144127	42.54354262	1239.531355	8/11/19	0.826400463	0.534733796	8/11/19 12:50	12:50:59	15.66666667	16.06555556	16.25666667	16.35333333	16.39666667	16.25444444	15.56777778	15.57777778	16.2	15.74333333	16.08	15.81444444	15.63111111	15.62444444	15.69111111	15.57111111	15.76888889	15.29333333	15.74	15.30555556	15.61555556	15.22111111	15.05555556	15.47333333	15.26333333	15.06	15.25111111	14.88222222	15.13888889	15.35222222	15.35222222	15.04111111	14.70777778	15.21555556	14.14888889	14.37111111	14.62888889	14.65444444	14.69	15.20555556	13.92777778
8/11/2019 12:50:02	-118.5144188	42.5435178	1239.693	8/11/19	0.826412037	0.53474537	8/11/19 12:50	12:51:00	15.5	16.375	16.17875	16.23625	16.4075	16.25125	15.45375	15.56	16.12375	15.70375	16.18125	15.775	15.64375	15.6925	15.73625	15.59375	15.68625	15.16125	15.72	15.3475	15.6425	15.2075	15.05625	15.38625	15.26875	15.07125	15.2275	14.95125	15.21625	15.26875	15.36875	14.99	14.75625	15.02	14.31125	14.37125	14.6475	14.59875	14.685	15.225	13.97
8/11/2019 12:50:03	-118.5144249	42.54349361	1239.81071	8/11/19	0.826423611	0.534756944	8/11/19 12:50	12:51:01	15.89	16.55375	16.34	16.395	16.51375	16.485	15.785	15.72375	16.36125	15.9425	16.23625	15.90125	15.91625	15.92875	15.86625	15.86875	16.05125	15.435	16.01625	15.515	15.915	15.54	15.31125	15.66875	15.4875	15.485	15.61375	15.21625	15.495	15.435	15.54375	15.27625	14.91125	15.18375	14.41875	14.52	14.69125	14.87	14.835	15.3425	14.16875
8/11/2019 12:50:04	-118.5144299	42.54347273	1239.9675	8/11/19	0.826435185	0.534768519	8/11/19 12:50	12:51:02	16.96428571	17.66428571	17.48714286	17.78	17.83714286	17.67142857	17.11571429	17.06857143	17.59571429	17.19428571	17.64428571	17.39857143	17.27428571	17.29571429	17.32142857	17.25142857	17.43857143	16.88428571	17.34285714	16.96571429	17.26714286	16.93285714	16.75857143	17.15	16.85571429	16.71714286	16.92	16.60142857	16.76857143	16.98428571	16.90571429	16.76	16.28428571	16.75857143	15.31571429	15.80714286	15.98285714	16.06571429	16.24428571	16.60571429	15.39571429
8/11/2019 12:50:05	-118.5144357	42.54344985	1240.115135	8/11/19	0.826446759	0.534780093	8/11/19 12:50	12:51:03	19.81333333	20.40777778	20.37777778	20.47777778	20.66	20.55111111	20.04666667	19.90555556	20.52	20.16555556	20.52777778	20.18444444	20.18555556	20.21222222	20.22777778	20.16222222	20.37	19.77555556	20.36	19.77333333	20.23222222	19.75888889	19.66666667	19.99555556	19.85222222	19.66888889	19.82222222	19.54333333	19.70888889	19.88333333	19.96222222	19.59	19.23777778	19.42666667	18.29444444	18.44222222	18.64222222	18.91777778	19.00777778	19.30888889	18.53333333
8/11/2019 12:50:06	-118.514442	42.54342413	1240.198452	8/11/19	0.826458333	0.534791667	8/11/19 12:50	12:51:04	22.66375	23.52	23.45875	23.6875	23.62	23.54875	22.98125	22.9475	23.615	23.07	23.5225	23.23375	23.20875	23.16125	23.22375	23.21875	23.37	22.76625	23.2475	22.84375	23.175	22.83375	22.74625	23.02375	22.7	22.66	22.8225	22.44625	22.7275	22.9075	22.935	22.5775	22.33625	22.4525	21.24875	21.2125	21.51875	21.755	21.91875	22.68	21.71125
8/11/2019 12:50:07	-118.5144476	42.5434017	1240.249677	8/11/19	0.826469907	0.534803241	8/11/19 12:50	12:51:05	25.18375	25.83125	25.78125	25.93375	26.0175	26.1	25.24125	25.11125	25.95	25.3975	25.91375	25.49125	25.54	25.52	25.5275	25.49875	25.63	25.07	25.5725	25.17875	25.55125	25.02375	24.91125	25.2725	25.09625	24.94125	25.0925	24.82625	25.01875	25.07875	25.06125	24.87	24.44625	24.64875	23.49	23.64125	24.15125	24.255	24.155	24.855	23.78375
8/11/2019 12:50:08	-118.5144528	42.54338207	1240.3	8/11/19	0.826481481	0.534814815	8/11/19 12:50	12:51:06	23.15625	23.65625	23.71375	23.89875	23.94125	23.8	23.13	23.23625	23.6925	23.31875	23.81	23.40875	23.4	23.35875	23.4125	23.35625	23.50875	22.915	23.4825	22.98875	23.43375	22.99625	22.85	23.17625	23.01	22.91375	23.02125	22.7775	23.01125	23.175	23.18875	22.92	22.5475	22.815	21.61	21.90625	22.0675	22.42	22.3025	23.00875	21.8875
8/11/2019 12:50:09	-118.5144583	42.5433609	1240.27	8/11/19	0.826493056	0.534826389	8/11/19 12:50	12:51:07	23.67428571	24.31285714	23.97857143	24.21857143	24.32	24.03571429	23.55428571	23.55	24.16857143	23.67571429	24.22571429	23.74857143	23.73285714	23.77142857	23.78142857	23.67	23.76714286	23.31142857	23.80142857	23.5	23.83714286	23.35714286	23.31571429	23.60714286	23.43142857	23.20857143	23.47428571	23.11857143	23.24857143	23.45428571	23.44142857	23.29857143	22.68571429	22.99285714	21.95428571	22.36857143	22.55428571	22.53	22.44714286	23.36428571	22.32142857
8/11/2019 12:50:10	-118.5144652	42.54333725	1240.321258	8/11/19	0.82650463	0.534837963	8/11/19 12:50	12:51:08	22.445	23.48625	23.29625	23.2475	23.48375	23.225	22.6075	22.61125	23.18125	22.75	23.29875	22.8325	22.8275	22.79125	22.88125	22.8325	22.93875	22.38125	22.95375	22.43875	22.81	22.39125	22.36375	22.6275	22.57625	22.30625	22.50625	22.16375	22.3825	22.52625	22.56125	22.31125	21.985	22.2375	21.375	21.4525	21.70375	21.785	21.9175	22.2025	21.50125
8/11/2019 12:50:11	-118.5144711	42.54331796	1240.44524	8/11/19	0.826516204	0.534849537	8/11/19 12:50	12:51:09	18.22444444	18.72666667	18.70888889	18.90111111	19.01333333	18.88777778	18.09222222	18.17444444	18.79555556	18.30222222	18.84111111	18.49888889	18.44888889	18.46444444	18.47555556	18.29111111	18.47444444	17.89444444	18.50666667	18.02666667	18.40555556	18.04666667	17.92333333	18.27	18.12333333	17.87666667	18.03222222	17.83222222	17.87222222	18.13333333	18.14777778	17.83555556	17.54111111	18.07888889	16.90222222	16.84333333	17.12555556	17.43	17.56333333	18.02333333	16.79222222
8/11/2019 12:50:12	-118.5144749	42.54331142	1240.514297	8/11/19	0.826527778	0.534861111	8/11/19 12:50	12:51:10	16.1575	16.695	16.8525	16.86875	16.8875	16.79625	16.11625	16.1475	16.6225	16.3075	16.66125	16.345	16.28625	16.23	16.32375	16.31875	16.40625	15.84875	16.37	15.87375	16.29	15.8425	15.725	16.2275	15.94125	15.76875	16.0225	15.65125	15.825	16.07	15.94375	15.825	15.36125	15.9875	14.83125	14.89125	15.2475	15.57	15.44625	15.9375	14.85875
8/11/2019 12:50:13	-118.5144754	42.54332126	1240.5066	8/11/19	0.826539352	0.534872685	8/11/19 12:50	12:51:11	15.5425	16.3325	16.14125	16.18375	16.535	16.385	15.71125	15.5875	16.26375	15.93375	16.3975	15.91875	15.895	15.88375	15.88875	15.7775	16.0525	15.44	16.0575	15.715	15.9625	15.5625	15.37625	15.77625	15.5975	15.39625	15.6825	15.26125	15.56625	15.76875	15.71	15.3125	15.01	15.26375	14.5375	14.49125	14.93875	14.72375	14.88	15.66875	14.3075
8/11/2019 12:50:14	-118.5144699	42.54335075	1240.47329	8/11/19	0.826550926	0.534884259	8/11/19 12:50	12:51:12	21.6825	22.32625	22.18625	22.4475	22.56625	22.33	21.63375	21.72	22.30875	21.75875	22.31	22.025	21.86625	21.82625	21.9125	21.85875	22.0525	21.43875	21.9975	21.5775	21.8925	21.52625	21.44375	21.6925	21.63375	21.4075	21.6325	21.375	21.4475	21.72375	21.70375	21.505	21.01625	21.535	20.415	20.38375	20.73375	20.7975	21.02375	21.485	20.57125
8/11/2019 12:50:15	-118.5144608	42.54338865	1240.381419	8/11/19	0.8265625	0.534895833	8/11/19 12:50	12:51:13	20.2625	20.9125	20.825	21.03875	21.27625	21.095	20.39625	20.3525	20.99875	20.52	21.09625	20.70125	20.54125	20.55875	20.6175	20.4925	20.67625	20.15375	20.75875	20.20125	20.64625	20.1175	20.0325	20.37875	20.21625	20.1225	20.21875	19.8925	20.065	20.345	20.2725	19.97125	19.3625	19.89625	18.6125	19.02375	19.0025	19.36375	19.4025	20.0575	19.01125
8/11/2019 12:50:16	-118.5144354	42.5434094	1240.288645	8/11/19	0.826574074	0.534907407	8/11/19 12:50	12:51:14	19.51888889	20.29333333	20.11222222	20.52777778	20.42	20.42222222	19.59555556	19.61888889	20.30222222	19.83555556	20.36444444	20.01222222	19.80222222	19.86777778	19.95666667	19.94111111	20.12666667	19.50222222	20.02333333	19.54888889	19.86777778	19.49222222	19.37888889	19.7	19.54111111	19.29333333	19.56777778	19.28333333	19.35555556	19.58222222	19.49333333	19.20222222	18.75	19.01111111	18.07777778	18.25222222	18.43111111	18.65333333	18.66666667	19.22555556	18.24333333
8/11/2019 12:50:17	-118.5143815	42.54341451	1240.317	8/11/19	0.826585648	0.534918981	8/11/19 12:50	12:51:15	22.57875	23.05875	23.20375	23.36375	23.525	23.3025	22.63875	22.62	23.36625	22.87875	23.30125	22.9775	22.9525	22.90125	22.8925	22.86875	23.055	22.4075	22.99875	22.615	22.96375	22.45375	22.39875	22.755	22.57625	22.41125	22.64125	22.2425	22.42125	22.69125	22.7225	22.33125	21.82875	22.075	21.04125	21.16625	21.415	21.7475	21.965	22.34875	21.23
8/11/2019 12:50:18	-118.5143136	42.54341103	1240.376226	8/11/19	0.826597222	0.534930556	8/11/19 12:50	12:51:16	16.36666667	16.99555556	16.87222222	17.20333333	17.20222222	17.07111111	16.43555556	16.37222222	17.01777778	16.53444444	16.95444444	16.73111111	16.59333333	16.57888889	16.64666667	16.53111111	16.73444444	16.20555556	16.71111111	16.29333333	16.63222222	16.34444444	16.10666667	16.43555556	16.29555556	16.18111111	16.32	16.01555556	16.17	16.38777778	16.36777778	16.11333333	15.76888889	16.05111111	15.05555556	15.07444444	15.46888889	15.4	15.85444444	15.93555556	14.95555556
8/11/2019 12:50:19	-118.5142504	42.54340465	1240.32475	8/11/19	0.826608796	0.53494213	8/11/19 12:50	12:51:17	20.43428571	21.08	21.20142857	21.39714286	21.45	21.27857143	20.59285714	20.50571429	21.23571429	20.76285714	21.33571429	20.93714286	20.83428571	20.86571429	20.88285714	20.94	20.99857143	20.39714286	21.02285714	20.42714286	20.94428571	20.46285714	20.39428571	20.68142857	20.58	20.39714286	20.65571429	20.35571429	20.41	20.65	20.73285714	20.52142857	20.07428571	20.34142857	19.22428571	19.40571429	19.42285714	19.89	19.98857143	20.78285714	19.58
8/11/2019 12:50:20	-118.5141885	42.54339843	1240.038568	8/11/19	0.82662037	0.534953704	8/11/19 12:50	12:51:18	19.295	20.03	20.05875	20.275	20.3325	20.27125	19.5025	19.56875	20.26	19.71625	20.24875	19.8625	19.7975	19.80125	19.87875	19.82375	19.8475	19.3975	19.9025	19.45375	19.935	19.49	19.36375	19.70625	19.51375	19.3025	19.6225	19.275	19.50625	19.66125	19.67375	19.4775	18.98125	19.3025	18.21125	18.27	18.7625	18.78375	18.755	19.425	18.40375
8/11/2019 12:50:21	-118.5141289	42.54339343	1239.301452	8/11/19	0.826631944	0.534965278	8/11/19 12:50	12:51:19	19.02888889	19.72	19.51222222	19.72444444	19.87555556	19.61111111	19.00444444	19.01222222	19.7	19.23888889	19.80555556	19.34333333	19.34666667	19.30111111	19.37222222	19.30111111	19.38444444	18.9	19.42888889	19.05555556	19.47333333	18.97333333	18.85333333	19.18333333	19.16111111	18.96	19.04222222	18.75888889	19.00444444	19.29666667	19.24111111	19.01	18.65666667	19.04666667	17.92	18.00333333	18.57888889	18.37444444	18.55555556	19.05666667	18.16888889
8/11/2019 12:50:22	-118.5140796	42.54338974	1238.384871	8/11/19	0.826643519	0.534976852	8/11/19 12:50	12:51:20	21.41375	22.1575	22.06125	22.16	22.38875	22.1275	21.46	21.3425	22.15625	21.5975	22.005	21.74375	21.65375	21.8275	21.7875	21.70125	21.95125	21.3275	21.83125	21.42	21.81375	21.3425	21.25875	21.66	21.4525	21.28	21.525	21.2125	21.44	21.57	21.62875	21.31625	20.9175	21.17625	20.005	20.21625	20.61	20.80875	20.695	21.4375	20.35625
8/11/2019 12:50:23	-118.5140318	42.54338562	1237.350097	8/11/19	0.826655093	0.534988426	8/11/19 12:50	12:51:21	19.92571429	20.54285714	20.58428571	20.68285714	20.64857143	20.68571429	19.99285714	20.01428571	20.72428571	20.24571429	20.71428571	20.42285714	20.27857143	20.35428571	20.46142857	20.33142857	20.52857143	19.96428571	20.47428571	20.02857143	20.39	19.97428571	19.84571429	20.16571429	20.09142857	19.91428571	20.05142857	19.72571429	20.02714286	20.18142857	20.19571429	19.97285714	19.40571429	19.68428571	18.39428571	18.58285714	19.15142857	19.12	19.25857143	19.97428571	18.74571429
8/11/2019 12:50:24	-118.5139866	42.54338124	1236.3374	8/11/19	0.826666667	0.535	8/11/19 12:50	12:51:22	22.19777778	23.04555556	22.89222222	23.32333333	23.3	23.21666667	22.38	22.42444444	23.10555556	22.57444444	23.02222222	22.78222222	22.70333333	22.65888889	22.68222222	22.66111111	22.87111111	22.22777778	22.77777778	22.34555556	22.77444444	22.25222222	22.18888889	22.58	22.36	22.13555556	22.51222222	22.12555556	22.31	22.47555556	22.36444444	22.23333333	21.68888889	21.83666667	20.58555556	20.89222222	21.01111111	21.64666667	21.38666667	22.22888889	21.17666667
8/11/2019 12:50:25	-118.5139416	42.5433765	1235.323097	8/11/19	0.826678241	0.535011574	8/11/19 12:50	12:51:23	24.1475	24.6375	24.81875	24.7	24.91	24.76125	24.145	24.20625	24.80375	24.35375	24.84375	24.43875	24.465	24.43375	24.475	24.43125	24.45625	23.8775	24.41625	24.00125	24.42875	24.08375	23.95125	24.22125	24.06375	23.90375	24.02625	23.825	23.955	24.14	24.16125	23.8575	23.43625	23.45875	22.12875	22.50625	22.65	23.185	23.3825	23.67125	22.765
8/11/2019 12:50:26	-118.5138959	42.54337104	1234.234774	8/11/19	0.826689815	0.535023148	8/11/19 12:50	12:51:24	24.265	24.82125	24.84375	25.0775	25.13625	24.9175	24.315	24.19	24.875	24.41	24.83625	24.50125	24.4925	24.55625	24.56375	24.50875	24.65	24.08875	24.6875	24.195	24.59875	24.11125	24.0875	24.405	24.18125	23.995	24.23125	23.935	24.03625	24.26	24.30625	24.03625	23.4175	23.61375	22.7275	22.84	23.1275	23.3825	23.3975	23.93875	22.97625
8/11/2019 12:50:27	-118.513849	42.54336506	1233.205839	8/11/19	0.826701389	0.535034722	8/11/19 12:50	12:51:25	20.96875	21.70125	21.68375	21.77	21.8175	21.73	21.055	21.06125	21.7275	21.29125	21.7525	21.3725	21.3425	21.30125	21.35375	21.34	21.4775	20.94625	21.5375	21.01625	21.5	20.97625	20.945	21.25375	21.11125	20.85625	21.12125	20.8	21.06625	21.2625	21.1325	20.92875	20.42625	20.88375	19.475	19.65625	20.1325	20.22125	20.2725	20.575	19.945
8/11/2019 12:50:28	-118.5138018	42.54335866	1232.142613	8/11/19	0.826712963	0.535046296	8/11/19 12:50	12:51:26	18.41888889	19.18222222	19.09	19.30333333	19.33777778	19.27111111	18.55888889	18.59888889	19.24	18.78555556	19.26111111	18.89	18.79888889	18.92888889	18.97111111	18.93111111	19.10444444	18.50666667	19.06888889	18.59777778	19.02555556	18.57222222	18.45444444	18.79222222	18.69444444	18.47111111	18.64444444	18.40888889	18.57111111	18.75666667	18.75555556	18.48222222	18.11	18.26444444	17.24111111	17.28222222	17.59777778	17.75222222	17.93333333	18.43	17.34888889
8/11/2019 12:50:29	-118.5137562	42.54335254	1231.201129	8/11/19	0.826724537	0.53505787	8/11/19 12:50	12:51:27	18.94375	19.65875	19.7025	19.93875	19.9375	19.8425	19.15625	19.165	19.87625	19.2825	19.81125	19.5325	19.3925	19.475	19.54	19.47875	19.64125	19.0925	19.58875	19.16	19.53625	19.12625	19.12125	19.4225	19.24	18.95375	19.26875	18.86875	19.11625	19.37	19.19	18.96375	18.5225	18.68875	17.595	17.87	18.11	18.4275	18.445	18.99625	17.86875
8/11/2019 12:50:30	-118.5137126	42.54334654	1230.4238	8/11/19	0.826736111	0.535069444	8/11/19 12:50	12:51:28	19.21777778	19.78111111	19.80666667	19.9	20.02222222	19.84333333	19.21777778	19.14888889	20	19.41444444	19.87111111	19.63888889	19.54888889	19.52888889	19.69	19.54222222	19.75222222	19.15666667	19.70222222	19.17222222	19.70111111	19.21777778	19.08888889	19.45	19.38888889	19.14777778	19.31666667	19.12	19.18444444	19.42777778	19.43555556	19.11444444	18.54666667	18.86111111	17.46666667	17.91444444	18.07666667	18.53222222	18.53333333	19.00555556	17.99222222
8/11/2019 12:50:31	-118.5136756	42.5433412	1229.294645	8/11/19	0.826747685	0.535081019	8/11/19 12:50	12:51:29	17.60142857	18.59285714	18.29	18.66714286	18.82428571	18.53285714	17.84714286	17.84142857	18.59	18.06857143	18.56857143	18.13857143	18.07428571	18.18857143	18.25857143	18.18428571	18.38571429	17.79142857	18.25	17.86	18.20428571	17.84857143	17.67142857	18.08285714	17.86142857	17.73285714	17.92428571	17.59714286	17.80714286	18.05571429	17.93571429	17.83142857	17.36714286	17.66571429	16.32142857	16.69	16.76	17.00285714	17.20857143	17.54142857	16.51571429
8/11/2019 12:50:32	-118.5136497	42.54333725	1228.625161	8/11/19	0.826759259	0.535092593	8/11/19 12:50	12:51:30	17.455	18.31625	18.025	18.00625	18.165	18.11375	17.42	17.3475	18.21	17.69375	18.0975	17.8225	17.61125	17.73	17.82875	17.7675	17.85375	17.27625	17.8375	17.30625	17.77	17.3025	17.1975	17.51	17.4275	17.19625	17.50125	17.1475	17.37875	17.60125	17.46	17.19625	16.74125	17.24625	15.925	16.0475	16.22	16.69125	16.9075	17.2825	16.09625
8/11/2019 12:50:33	-118.5136384	42.54333571	1227.999194	8/11/19	0.826770833	0.535104167	8/11/19 12:50	12:51:31	17.12571429	17.69	17.60571429	17.73285714	17.78857143	17.82857143	17.04571429	17.05857143	17.78571429	17.31571429	17.68142857	17.37142857	17.26571429	17.35571429	17.41857143	17.27428571	17.52285714	16.82	17.48571429	16.97714286	17.31142857	16.99	16.79714286	17.1	16.98428571	16.76857143	17.04714286	16.71714286	16.86857143	17.08285714	17.09857143	16.95285714	16.34714286	16.86428571	15.56142857	15.73285714	16.22285714	16.15714286	16.41142857	17.01857143	15.73142857
8/11/2019 12:50:34	-118.5136237	42.54333194	1227.2148	8/11/19	0.826782407	0.535115741	8/11/19 12:50	12:51:32	17.92888889	18.60888889	18.62	18.60555556	18.88333333	18.7	17.95555556	17.88	18.59666667	18.16	18.63555556	18.25	18.17	18.2	18.26555556	18.18444444	18.46777778	17.85888889	18.30666667	17.76555556	18.29222222	17.87333333	17.72555556	18.06111111	17.99555556	17.66666667	17.91444444	17.59333333	17.81222222	17.99888889	18.01	17.71555556	17.20888889	17.41555556	16.53444444	16.98444444	16.85222222	17.09444444	17.17222222	17.73777778	16.67444444
8/11/2019 12:50:35	-118.5136053	42.54332834	1226.409935	8/11/19	0.826793981	0.535127315	8/11/19 12:50	12:51:33	18.68	19.52571429	19.40142857	19.63714286	19.73428571	19.66857143	18.9	18.93142857	19.62285714	19.15428571	19.44714286	19.19714286	19.17714286	19.16142857	19.23285714	19.28857143	19.26285714	18.75714286	19.29714286	18.85428571	19.28	18.85571429	18.73142857	19.03428571	18.85714286	18.53285714	18.93	18.53428571	18.74285714	18.92428571	18.94571429	18.67428571	18.18142857	18.27857143	17.22	17.27571429	17.62714286	17.99	17.75714286	18.80428571	17.55714286
8/11/2019 12:50:36	-118.5135852	42.54332591	1225.610935	8/11/19	0.826805556	0.535138889	8/11/19 12:50	12:51:34	20.43888889	21.05888889	21.10333333	21.17222222	21.32	21.11666667	20.38333333	20.46111111	21.19444444	20.68333333	21.05	20.79333333	20.72777778	20.76444444	20.83222222	20.75888889	20.97222222	20.34111111	20.95555556	20.36444444	20.80222222	20.40666667	20.35222222	20.66333333	20.40666667	20.32555556	20.51777778	20.17111111	20.40111111	20.58444444	20.51333333	20.26333333	19.82222222	20.27888889	19.05222222	18.81555556	19.38777778	19.59333333	19.66666667	20.37333333	19.14333333
8/11/2019 12:50:37	-118.5135636	42.5433222	1224.908419	8/11/19	0.82681713	0.535150463	8/11/19 12:50	12:51:35	21.68222222	22.53888889	22.42222222	22.52222222	22.63888889	22.55333333	21.84111111	21.94888889	22.56444444	22.07	22.48222222	22.24777778	22.11111111	22.11333333	22.15222222	22.20444444	22.26333333	21.61777778	22.22333333	21.70888889	22.11777778	21.65444444	21.63777778	21.97333333	21.81666667	21.59	21.84777778	21.51333333	21.56444444	21.78888889	21.77333333	21.61	21.21444444	21.24666667	20.09555556	20.46111111	20.43222222	20.94888889	20.96	21.40888889	20.32
8/11/2019 12:50:38	-118.5135397	42.5433169	1224.402323	8/11/19	0.826828704	0.535162037	8/11/19 12:50	12:51:36	22.19	23.115	22.85375	22.985	23.19625	22.9225	22.2625	22.2625	23.00375	22.4275	22.88625	22.60375	22.575	22.44125	22.61625	22.47875	22.6075	21.995	22.55125	22.16375	22.56625	22.11375	21.93375	22.27125	22.11125	21.90875	22.135	21.74	21.85375	22.1525	22.205	21.84375	21.43625	21.80125	20.12125	20.64375	20.88375	21.1525	21.1675	21.72875	20.76
8/11/2019 12:50:39	-118.5135224	42.54331276	1224.0446	8/11/19	0.826840278	0.535173611	8/11/19 12:50	12:51:37	18.225	18.90625	18.745	18.98375	19.02	18.94875	18.18	18.1425	18.85375	18.38375	18.84875	18.495	18.445	18.41625	18.41375	18.4225	18.51875	17.8975	18.42625	17.94875	18.43	18.01375	17.875	18.2575	17.98375	17.7425	18.06375	17.73625	17.8075	18.0225	18.0775	17.64875	17.23	17.5525	16.24125	16.5575	17.1475	17.22	17.29	17.63	16.60375
8/11/2019 12:50:40	-118.5135173	42.54331144	1223.826065	8/11/19	0.826851852	0.535185185	8/11/19 12:50	12:51:38	18.6625	19.3325	19.2925	19.41375	19.41625	19.33625	18.675	18.61625	19.395	18.91375	19.38	18.98125	18.8825	18.935	18.9575	18.87125	19.06	18.36625	19.00625	18.4775	18.7925	18.32375	18.3125	18.62	18.4275	18.2375	18.45625	18.08125	18.34	18.44625	18.515	18.11625	17.755	18.025	16.82	17.08	17.3775	17.4775	17.455	18.22	17.07875
8/11/2019 12:50:41	-118.5135075	42.54330854	1223.654903	8/11/19	0.826863426	0.535196759	8/11/19 12:50	12:51:39	17.03444444	17.60777778	17.57666667	17.63333333	17.78333333	17.62333333	16.90555556	16.91	17.58222222	17.06222222	17.50888889	17.18444444	17.10888889	17.14888889	17.11111111	17.10777778	17.17222222	16.60222222	17.06888889	16.72555556	17.02888889	16.69222222	16.47666667	16.86888889	16.76222222	16.42111111	16.76888889	16.34444444	16.61777778	16.82555556	16.67333333	16.48555556	16.05333333	16.38888889	15.17888889	15.72777778	15.72666667	15.96888889	16.05666667	16.47222222	15.32
8/11/2019 12:50:42	-118.5134941	42.54330563	1223.493742	8/11/19	0.826875	0.535208333	8/11/19 12:50	12:51:40	19.0425	19.71	19.57	19.6375	19.795	19.565	19.07625	18.9325	19.7275	19.13625	19.69875	19.2475	19.295	19.15375	19.16625	19.055	19.2225	18.74125	19.25875	18.78125	19.14375	18.67375	18.53375	18.8975	18.78	18.44625	18.695	18.3875	18.64375	18.74625	18.65875	18.47625	18.00875	18.26625	17.1225	17.55375	17.7375	18.025	17.95625	18.43	17.27125
8/11/2019 12:50:43	-118.5134888	42.54330542	1223.3352	8/11/19	0.826886574	0.535219907	8/11/19 12:50	12:51:41	17.2075	17.83875	17.79125	17.91625	17.9575	17.7975	17.12625	17.13875	17.7075	17.19125	17.6825	17.27875	17.325	17.28125	17.345	17.16125	17.52375	16.87	17.39875	16.92375	17.3275	16.825	16.71875	17.2225	17.04	16.75125	16.9225	16.59875	16.86875	17.0175	17.04875	16.75	16.39125	16.595	15.36875	15.89625	16.06	16.12375	16.46125	16.8825	15.6825
8/11/2019 12:50:44	-118.5134852	42.54330553	1223.189839	8/11/19	0.826898148	0.535231481	8/11/19 12:50	12:51:42	20.78666667	21.60111111	21.37222222	21.59666667	21.66	21.62111111	20.94888889	20.83555556	21.61888889	21.11444444	21.61777778	21.19111111	21.11666667	21.25444444	21.12666667	21.11333333	21.27333333	20.60333333	21.24333333	20.73888889	21.19111111	20.66555556	20.48666667	20.87666667	20.71	20.52888889	20.60666667	20.33111111	20.51333333	20.69	20.73666667	20.46	19.92888889	20.14666667	18.93	19.20333333	19.42222222	19.52222222	19.57444444	20.18777778	19.07222222
8/11/2019 12:50:45	-118.5134775	42.54330397	1223.024161	8/11/19	0.826909722	0.535243056	8/11/19 12:50	12:51:43	30.12375	31.13	30.8825	31.16625	31.24875	31.23625	30.59125	30.54625	31.2825	30.8275	31.31875	30.96125	30.87375	30.8425	30.9125	30.83875	31.01	30.375	31	30.3925	30.8075	30.50625	30.365	30.70875	30.54625	30.32125	30.605	30.22375	30.40875	30.55375	30.5425	30.28125	29.80625	29.9975	28.85	28.69625	28.74625	29.25125	29.43625	29.805	28.83125
8/11/2019 12:50:46	-118.5134779	42.54330402	1222.930032	8/11/19	0.826921296	0.53525463	8/11/19 12:50	12:51:44	40.06555556	40.86	40.71222222	40.82222222	41.00666667	41.01555556	40.37666667	40.30777778	40.87	40.39	40.79666667	40.45333333	40.23444444	40.32888889	40.33111111	40.19222222	40.33	39.69222222	40.36666667	39.73222222	40.31111111	39.73333333	39.78111111	40.02777778	39.93111111	39.73444444	39.94	39.70222222	39.82222222	40.14888889	40.15222222	39.95222222	39.58666667	39.82333333	38.62888889	38.40666667	38.26444444	38.47666667	39.09888889	39.40777778	37.98111111
8/11/2019 12:50:47	-118.5134779	42.54330444	1222.758065	8/11/19	0.82693287	0.535266204	8/11/19 12:50	12:51:45	31.18428571	31.69	31.65428571	31.85142857	32.11714286	32.18142857	31.33714286	31.38285714	32.17142857	31.57714286	32.12142857	31.62714286	31.49285714	31.60857143	31.56142857	31.47	31.64142857	31.00857143	31.63142857	30.94714286	31.45	31.00142857	30.87142857	31.19857143	31.13285714	30.96	31.12857143	30.75857143	31.00714286	31.06428571	31.06857143	30.74571429	30.29285714	30.56285714	29.72571429	29.93571429	29.77142857	29.99714286	30.10285714	30.83	29.38428571
8/11/2019 12:50:48	-118.5134752	42.54330442	1222.6076	8/11/19	0.826944444	0.535277778	8/11/19 12:50	12:51:46	23.765	24.7025	24.73375	24.8025	24.97875	24.7625	24.12375	24.18625	24.925	24.38375	24.85375	24.58	24.45	24.4875	24.545	24.51875	24.6425	24.17375	24.58875	24.1875	24.5975	24.16375	24.0725	24.495	24.37375	24.13875	24.325	24.02375	24.235	24.46125	24.48125	24.345	23.72625	24.1275	23.0625	23.32625	23.46375	23.55625	23.495	24.085	22.995
8/11/2019 12:50:49	-118.5134746	42.54330511	1222.482806	8/11/19	0.826956019	0.535289352	8/11/19 12:50	12:51:47	15.295	16.3475	16.18625	16.4675	16.47625	16.41875	15.97625	15.80125	16.62	16.23125	16.615	16.33	16.1675	16.1975	16.3125	16.3225	16.47625	15.885	16.53	16.0525	16.46875	16.09125	16.04125	16.355	16.29125	15.98875	16.3425	16.0125	16.23875	16.49375	16.42875	16.265	16.205	16.62625	15.23375	14.89125	15.4825	14.88125	16.175	16.00125	14.68
8/11/2019 12:50:50	-118.5134753	42.54330628	1222.274419	8/11/19	0.826967593	0.535300926	8/11/19 12:50	12:51:48	3.468888889	4.152222222	4.184444444	4.504444444	4.74	4.626666667	3.851111111	3.99	4.658888889	4.266666667	4.703333333	4.298888889	4.326666667	4.294444444	4.453333333	4.394444444	4.653333333	4.094444444	4.672222222	4.304444444	4.658888889	4.244444444	4.175555556	4.597777778	4.416666667	4.266666667	4.378888889	4.203333333	4.477777778	4.783333333	4.68	4.486666667	3.965555556	4.551111111	3.544444444	3.64	3.916666667	4.017777778	3.993333333	4.864444444	3.351111111
8/11/2019 12:50:51	-118.5134753	42.54330579	1221.972871	8/11/19	0.826979167	0.5353125	8/11/19 12:50	12:51:49	0.097142857	0.778571429	0.891428571	0.871428571	1.127142857	1.118571429	0.457142857	0.467142857	1.182857143	0.787142857	1.317142857	0.915714286	0.868571429	0.887142857	0.94	0.912857143	1.208571429	0.704285714	1.282857143	0.851428571	1.137142857	0.87	0.705714286	1.118571429	0.971428571	0.892857143	1.09	0.724285714	1.021428571	1.267142857	1.268571429	1.037142857	0.632857143	1.138571429	0.19	0.362857143	0.707142857	0.658571429	0.642857143	1.26	-0.035714286
[truncated: 99 more columns]
